1 **Reference transcriptomes of porcine peripheral immune cells created through bulk and**  
2 **single-cell RNA sequencing**

3  
4 Juber Herrera-Uribe<sup>1†</sup>, Jayne E. Wiarda<sup>2,3,4†</sup>, Sathesh K. Sivasankaran<sup>2,5</sup>, Lance Daharsh<sup>1</sup>, Haibo  
5 Liu<sup>1</sup>, Kristen A. Byrne<sup>2</sup>, Timothy P.L .Smith<sup>6</sup>, Joan K. Lunney<sup>7</sup>, Crystal L. Loving<sup>2‡\*</sup>,  
6 Christopher K. Tuggle<sup>1‡\*</sup>

7  
8 <sup>1</sup> Department of Animal Science, Iowa State University, Ames, IA, USA.

9 <sup>2</sup> Food Safety and Enteric Pathogens Research Unit, National Animal Disease Center,  
10 Agricultural Research Service, United States Department of Agriculture, Ames, IA, USA

11 <sup>3</sup> Immunobiology Graduate Program, Iowa State University, Ames, IA, USA

12 <sup>4</sup> Oak Ridge Institute for Science and Education, Agricultural Research Service Participation  
13 Program, Oak Ridge, TN, USA

14 <sup>5</sup> Genome Informatics Facility, Iowa State University, Ames, IA, USA

15 <sup>6</sup> USDA, ARS, U.S. Meat Animal Research Center, Clay Center, Nebraska, USA

16 <sup>7</sup> USDA-ARS, Beltsville Agricultural Research Center, Animal Parasitic Diseases Laboratory,  
17 Beltsville, MD, USA.

18 † These authors have contributed equally to this work and share first authorship

19 ‡ These authors have contributed equally to this work and share senior and last authorship

20 **\*Correspondence:**

21 Corresponding authors: [cktuggle@iastate.edu](mailto:cktuggle@iastate.edu), [crystal.loving@usda.gov](mailto:crystal.loving@usda.gov)

22

23 **Keywords:** Pig, immune cells, transcriptome, Single-cell RNA-seq, bulkRNA-seq, FAANG.

24 **ABSTRACT**

25 Pigs are a valuable human biomedical model and an important protein source supporting global  
26 food security. The transcriptomes of peripheral blood immune cells in pigs were defined at the  
27 bulk cell-type and single cell levels. First, eight cell types were isolated in bulk from peripheral  
28 blood mononuclear cells (PBMCs) by cell sorting, representing Myeloid, NK cells and specific  
29 populations of T and B cells. Transcriptomes for each bulk population of cells were generated by  
30 RNA-seq with 10,974 expressed genes detected. Pairwise comparisons between cell types revealed  
31 specific expression, while enrichment analysis identified 1,885 to 3,591 significantly enriched  
32 genes across all 8 cell types. Gene Ontology analysis for the top 25% of significantly enriched  
33 genes (SEG) showed high enrichment of biological processes related to the nature of each cell  
34 type. Comparison of gene expression indicated highly significant correlations between pig cells  
35 and corresponding human PBMC bulk RNA-seq data available in Haemopedia. Second, higher  
36 resolution of distinct cell populations was obtained by single-cell RNA-sequencing (scRNA-seq)  
37 of PBMC. Seven PBMC samples were partitioned and sequenced that produced 28,810 single cell  
38 transcriptomes distributed across 36 clusters and classified into 13 general cell types including  
39 plasmacytoid dendritic cells (DC), conventional DCs, monocytes, B cell, conventional CD4 and  
40 CD8  $\alpha\beta$  T cells, NK cells, and  $\gamma\delta$  T cells. Signature gene sets from the human Haemopedia data  
41 were assessed for relative enrichment in genes expressed in pig cells and integration of pig scRNA-  
42 seq with a public human scRNA-seq dataset provided further validation for similarity between  
43 human and pig data. The sorted porcine bulk RNAseq dataset informed classification of scRNA-  
44 seq PBMC populations; specifically, an integration of the datasets showed that the pig bulk  
45 RNAseq data helped define the CD4CD8 double-positive T cell populations in the scRNA-seq  
46 data. Overall, the data provides deep and well-validated transcriptomic data from sorted PBMC

47 populations and the first single-cell transcriptomic data for porcine PBMCs. This resource will be  
48 invaluable for annotation of pig genes controlling immunogenetic traits as part of the porcine  
49 Functional Annotation of Animal Genomes (FAANG) project, as well as further study of, and  
50 development of new reagents for, porcine immunology.

51

## 52 **INTRODUCTION**

53 A major goal of biological research is using genomic information to predict complex  
54 phenotypes of individuals or individual cells with specific genotypes. Predicting complex  
55 phenotypes is an important component of broad Genome-to-Phenome (G2P) understanding  
56 (Koltjes et al., 2019), and investing in sequencing of multiple animal genomes, including pigs  
57 (*Sus scrofa*), for improved genome and cell functional annotation is key in solving the G2P  
58 question (Andersson et al., 2015; Giuffra et al., 2019). In addition to their major role in the  
59 world supply of dietary protein, pigs have anatomic, physiologic, and genetic similarities to  
60 humans and serve as biomedical models for human disease and regenerative medicine (reviewed  
61 in (Swindle et al., 2012; Kobayashi et al., 2018). Thus, deep annotation of porcine genome  
62 function would be a major milestone for addressing the G2P question. A highly contiguous  
63 porcine genome assembly with gene model-level annotation was recently published (Warr et al.,  
64 2020). However, this annotation is based primarily on RNA sequencing (RNA-seq) data from  
65 solid tissues, with few sample types representative of immune cells, with the exception of  
66 alveolar macrophages and dendritic cells (Auray et al 2016). Given the interaction of animal  
67 health and growth, any functional annotation of the porcine genome will be incomplete without  
68 deep analysis of expression patterns and regulatory elements controlling the immune system.

69           The transcriptomes of circulating immune cells serve as a window into porcine immune  
70 physiology and traits (Chaussabel et al., 2010; Mach et al., 2013; Schroyen and Tuggle, 2015;  
71 Auray et al., 2020). Blood RNA profiling has been used to understand variation in porcine  
72 immune responses (Huang et al., 2011; Arceo et al., 2013; Knetter et al., 2015; Munyaka et al.,  
73 2019) and genetic control of gene expression (Maroilley et al., 2017). One goal of such research  
74 is to develop gene signatures predictive of disease states (Berry et al., 2010) and predict  
75 responses to immunizations and/or infections (Chaussabel and Baldwin, 2014; Tsang et al.,  
76 2014), as has been demonstrated in humans. Whole blood is easily collected from live animals,  
77 but represents an extremely complex mixture of cell types. Estimates of gene expression in  
78 mixed samples are inherently inaccurate as cell composition differences are difficult to adjust  
79 for, complicating the interpretation of RNA differences across samples and treatments. Thus,  
80 starting from whole blood transcriptomic data, it is nearly impossible to link gene expression and  
81 regulation to a specific cell or cell type. To determine direct regulatory interactions, we must  
82 analyze specific cell populations and even individual cells. A cell type-specific understanding of  
83 peripheral immune cell gene expression patterns will thus enhance biological understanding of  
84 porcine immunity, reveal targets for phenotyping, and provide a comparison to other species.

85           Predominant immune cell populations in porcine peripheral blood mononuclear cell  
86 (PBMC) preparations are comprised mainly of monocytes, B-cells, and T-cells, with minor  
87 fractions of dendritic cells (DCs), natural killer (NK) cells, and NKT-cells also present. Porcine  
88 peripheral T-cell populations (reviewed in (Gerner et al., 2009a; Gerner et al., 2015) and DCs  
89 (Summerfield et al., 2015; Auray et al., 2016) are readily described based on phenotype, though  
90 deeper characterization of porcine immune cells could improve identification of valuable reagent  
91 targets and biological understanding of porcine immunity. T-cell populations are commonly

92 grouped as  $\alpha\beta$  or  $\gamma\delta$  T-cells according to T-cell receptor (TCR) chain expression and further  
93 divided based on CD2, CD4, CD8 $\alpha$ , and/or CD8 $\beta$  expression. Pigs have a unique CD2<sup>-</sup>  $\gamma\delta$  T-cell  
94 lineage contributing to higher percentages of circulating  $\gamma\delta$  T-cells (Takamatsu et al., 2006) and  
95 unique  $\alpha\beta$  T-cells expressing both CD4 and CD8 $\alpha$  (Zuckermann, 1999). Relatively little is  
96 known about different circulating B-cell populations in pigs, as reagents for phenotyping are  
97 limited.

98         Various technical approaches can be used to enrich or isolate specific cell populations,  
99 improving resolution of cell types for deeper interrogation of gene expression. Flow cytometry is  
100 used to characterize cells based on expression of cell type-specific protein markers, and live cells  
101 can be sorted by magnetic- and/or fluorescence-activated cell sorting (MACS/FACS) for use in  
102 subsequent assays. MACS/FACS enrichment followed by transcriptomic analysis can provide  
103 additional insight of gene expression in specific cell types, but cells expressing the same  
104 combination of markers are often still a heterogeneous mixture (Sutermaster and Darling, 2019).  
105 Some major subtypes of porcine immune cell populations can be labeled for cell sorting by  
106 existing antibody reagents (Gerner et al., 2009b), but some subtypes such as B-cells lack these  
107 resources.

108         An exciting alternative to sorting specific cell types for transcriptomic analysis is single-  
109 cell RNA-seq (scRNA-seq). Many scRNA-seq approaches do not require prior  
110 phenotypic/functional information or antibody reagents but instead rely on physical partitioning  
111 of cells to uniquely tagged transcripts from individual cells and sharpen resolution of subsequent  
112 transcriptomic analysis to single cells (Liu and Trapnell, 2016; Vieira Braga et al., 2016; Zheng  
113 et al., 2017). scRNA-seq methods have been applied to human PBMCs (Zheng et al., 2017) and  
114 provide more accurate and detailed analyses of transcriptional landscapes that can identify new

115 cell types (Villani et al., 2017) when compared to other transcriptomic approaches. There are  
116 limitations to scRNA-seq, with tradeoffs in total genes detected per cell versus total cells  
117 captured for analysis, depending on the approach used (Wilson and Göttgens, 2018).

118 To deeply annotate the porcine genome for peripheral mononuclear immune cell gene  
119 expression and further inform phenotype and function of the heterogenous pool of immune cells  
120 in PBMC preparations, two approaches were used to isolate peripheral immune cells for RNA-  
121 seq. MACS followed by FACS was used to enrich for eight PBMC populations using  
122 population-specific cell surface markers, and RNA isolated from enriched populations was used  
123 for bulk RNA-seq (bulkRNA-seq) or a NanoString assay to evaluate gene expression. PBMCs  
124 were also subjected to droplet-based partitioning for scRNA-seq. Gene expression patterns of  
125 porcine immune cells using different approaches were compared to each other and to multiple  
126 human datasets. Complementary methods provided an improved annotation and deeper  
127 understanding of porcine PBMCs, as well as explicated datasets for further query by the research  
128 community.

129

## 130 **MATERIAL AND METHODS**

### 131 **Animals and PBMC isolation**

132 Four separate PBMC isolations were performed, with different animals used in each  
133 experiment. Cells were used for bulkRNA-seq, targeted RNA detection (NanoString), or scRNA-  
134 seq. PBMCs from experiments were used as follows: Experiment A (ExpA) for bulkRNA-seq of  
135 sorted populations from two ~6-month-old pigs (A1, A2); Experiment B (Exp B) for NanoString  
136 and scRNA-seq from three ~12-month-old pigs (B1, B2, B3); Experiment C (ExpC) for scRNA-  
137 seq from three ~12-month-old pigs (C1, C2, C3); Experiment D (ExpD) for scRNA-seq from

138 two ~7-week-old pigs (D1, D2). All pigs were crossbred, predominantly Large White and  
139 Landrace heritage. All animal procedures were performed in compliance with and approval by  
140 NADC Animal Care and Use Committee. PBMCs were isolated, enumerated, and viability  
141 assessed as previously described (Byrne et al., 2020).

142

### 143 **Enrichment and sorting eight leukocyte populations by MACS/FACS**

144 PBMCs were labeled with biotin labeled anti-porcine CD3 $\epsilon$  (PPT3, Washington State  
145 University Monoclonal Antibody Center) for 15 min at 4 °C, mixing continuously. Cells were  
146 washed with Hank's Balanced Salt Solution (HBSS), incubated with anti-biotin microbeads  
147 (Miltenyi Biotec), placed on LS columns, and separated into CD3 $\epsilon^+$  and CD3 $\epsilon^-$  fractions  
148 according to manufacturer's directions (Miltenyi Biotec). CD3 $\epsilon^+$  and CD3 $\epsilon^-$  fractions were each  
149 fluorescently-sorted into four subpopulations based on surface marker expression shown in  
150 Figure 1 and Table 1. For NanoString assays, B-cells were sorted as CD3 $\epsilon^-$ CD172 $\alpha^+$ CD8 $\alpha^-$ ;  
151 CD21 was not used for sorting. Each fraction for FACS was confirmed CD3 $\epsilon^+$  or CD3 $\epsilon^-$  by  
152 labeling with anti-mouse IgG1-PE-Cy7 to detect anti-CD3 $\epsilon$  antibody used for MACS. Cells were  
153 sorted into supplemented HBSS using a BD FACSAria II with 70mm nozzle. After sorting, cells  
154 were pelleted and enumerated as described above. Sorted cell purity was >85% for each  
155 population. Cells were stained, sorted, and further processed within 10h of collection keeping  
156 cells on ice between processing steps.

157

### 158 **RNA isolation for bulkRNA-seq/NanoString**

159 BulkRNA-seq: after FACS, cells were pelleted, enumerated, and immediately lysed in  
160 RLT Plus buffer. RNA extractions were performed using the AllPrep DNA/RNA MiniKit

161 (QIAGEN) following manufacturer's instructions. Eluted RNA was treated with RNase-free  
162 DNase (QIAGEN). RNA quantity/integrity were assessed with an Agilent 2200 TapeStation  
163 system (Agilent Technologies). Samples used had RNA integrity numbers (RINs)  $\geq 7.9$ . From  
164 ExpA, only one RNA sample for NK cells was used.

165 For NanoString assay: after FACS, cells were pelleted, enumerated, and immediately  
166 stored in Trizol. RNA extraction was performed using the Direct-zol RNA MicroPrep Kit  
167 (Zymo) with on-column DNase treatment following manufacturer's instructions. RNA quantity  
168 and integrity were assessed as described above, with RINs  $\geq 6.9$ . RNA was preserved at  $-80^{\circ}\text{C}$   
169 until further use.

170

#### 171 **BulkRNA-seq library preparation and data analysis**

172 RNA was fragmented and 15 libraries prepared using the TruSeq Stranded Total RNA  
173 Sample Preparation Kit (Illumina). Libraries were diluted and pooled in approximately  
174 equimolar amounts. Pooled libraries were sequenced in paired-end mode (2x150-bp reads) using  
175 an Illumina NextSeq 500 (150 cycle kit).

176

#### 177 ***Preprocessing, mapping, alignment, quality control***

178 Data processing was performed as previously reported (Herrera-Uribe et al., 2020) using  
179 Sscrofa 11.1 genome and annotation v11.1.97 were used. Counts per gene of each sample in the  
180 two count tables were added together to get the final count table. Given that different types of  
181 immune cells have different transcriptome profiles (Hicks and Irizarry, 2015), YARN (Paulson et  
182 al., 2017), a tissue type-aware RNA-seq data normalization tool, was used to filter and normalize  
183 the count table. Genes with extremely low expression levels ( $< 4$  counts in at least one cell type)



184 were filtered out using `filterLowGenes()`. The final count table contained 12,261 genes across 15  
185 samples, which was then normalized using `normalizeTissueAware()`, which leverages the smooth  
186 quantile normalization method (Hicks et al., 2018).

187 Data quality control was performed using DESeq2 (v1.24.0) (Love et al., 2014) within  
188 RStudio s (v1.2.1335). Regularized log-transformation was applied to the normalized count table  
189 with the `rld` function. Then principal component analysis (PCA) and sample similarity analyses  
190 were carried out and visualized using `plotPCA()` and `distancePlot()`, respectively. Heatmaps to  
191 display enriched genes were created using `heatmap` (v1.0.12) within RStudio.

192

### 193 ***Cell type-enriched and cell type-specific gene identification***

194 The normalized count table was used for differential gene expression (DGE) analysis  
195 with DESeq2 by setting the size factor for each sample to 1. A generalized linear model was  
196 fitted for each gene in the count table, with negative binomial response and log link function of  
197 the effect of cell types and pig subjects. `nbinomWaldTest()` was used to estimate and test the  
198 significance of regression coefficients with the following explicit parameter settings:  
199 `betaPrior=FALSE,maxit=50000,useOptim=TRUE,useT=FALSE,useQR=TRUE`. Cell type-  
200 enriched genes and cell type-specific genes were identified using the `results` function separately.  
201 A gene was labeled as cell-type enriched if the expression level (averaged across replicates) in  
202 one cell type was at least 2x higher than the average across all remaining cell types and adjusted  
203 p-value <0.05. A gene was labeled as cell type-specific if the averaged expression level in one  
204 cell type was at least 2x higher in pairwise comparison to the average in each other cell type and  
205 adjusted p-value <0.05 (Benjamini and Hochberg, 1995). Heatmaps to display specific genes  
206 were created as mentioned above.

207 For cross-species comparison, human hematopoietic cell (Haemopedia) RNA-seq  
208 expression data (Hilton Laboratory at the Walter and Eliza Hall Institute<sup>1</sup>) was used. Only  
209 orthologous genes with one-to-one matches between human and pig (orthologous gene list  
210 obtained from BioMart (Durinck et al., 2009) were compared. Orthologous gene transcript per  
211 million (TPM) values from naive and memory B-cells, myeloid dendritic cells (myDC), myeloid  
212 dendritic cells CD123+ (CD123PmDC), plasmacytoid DC (pDC), monocytes, NK cells, CD4T  
213 and CD8T cells from healthy donors were used (Choi et al., 2019). Spearman rank correlation  
214 analyses was performed to identify correlation between orthologous gene expression levels  
215 (absolute TPM) in pig and human sorted populations. Significance level was set at  $P < 0.05$  and  
216 level of Spearman's rank correlation coefficient ( $\rho$ ) was defined as low ( $< 0.29$ ), moderate (0.3-  
217 0.49), and strong (0.5-1) correlation.

218

### 219 ***Gene Ontology (GO) enrichment analysis***

220 Metascape analysis (Zhou et al., 2019) was performed for GO analysis of the top 25%  
221 enriched genes and specific genes identified as described above, with threshold p-value  $< 0.01$ .  
222 Several terms were clustered into the most enriched GO term. Term pairs with Kappa similarity  
223 score  $> 0.3$  were displayed as a network to show relationship among enriched terms. Terms  
224 associated with more genes tended to have lower P-values. All networks displayed were  
225 visualized using Cytoscape. All Ensembl Gene IDs with detectable expression level in each cell  
226 type were used as the background reference.

227

### 228 **NanoString assay and data analysis**

---

<sup>1</sup> <https://www.haemosphere.org/datasets/show>

229 A total of 230 test genes with nine housekeeping genes, eight positive and nine negative  
230 control genes were chosen for gene expression quantification on the NanoString nCounter  
231 analysis system (NanoString Technologies) using custom-made probes. The custom designed  
232 CodeSet was selected from genes and pathways associated with porcine blood, lung, lymph  
233 node, endometrium, placenta or macrophage response to infection with a porcine virus (Van  
234 Goor et al., 2020). RNA samples were diluted to 25-100 ng/ul in RNase-free water, and 5 ul of  
235 each sample was used in the assay using manufacturer's instructions with the nCounter Master  
236 kit.

237 The nCounter analysis system produces discrete count data for each gene assayed within  
238 each sample. We used the NanoString software nSolver Analysis Software (v3.0, NanoString  
239 Technologies), following manufacturer's instructions. The nSolver corrected for background  
240 based on negative control samples, performed within-sample normalization based on positive  
241 control probes, and performed normalization across samples using the median expression values  
242 of housekeeping genes (*GAPDH*, *HMBS*, *HPRT1*, *RPL32*, *RPL4*, *SDHA*, *TBP*, *TOP2B*, *YWHAZ*),  
243 providing confidence in our normalization method.

244 All statistical analyses were performed using the statistical programming language R  
245 v3.5. Raw count data were normalized using `normalizationFactors()` and  
246 `NanoStringDataNormalization()` from `NanoStringDiff` (v1.1.2.0) (Wang et al., 2016). One gene  
247 (*ISG20*) without detected expression in any samples was removed. Hierarchical clustering and  
248 PCA suggested there were substantial hidden variations among the expression data. Surrogate  
249 variable analysis has been shown to be a powerful method to detect and adjust for hidden  
250 variations in high throughput gene expression data (Li et al., 2014; Qian Liu, 2016), so surrogate  
251 variable analysis was applied to remove further hidden variations in the gene expression data

252 using svaseq() from sva (v3.30.1) (Leek et al., 2012). A full model with cell subpopulations and  
253 RINs as independent variables, and a reduced model with RINs as the only independent variable  
254 were used. Three surrogate variables were estimated and used to adjust for the hidden variations.

255 Gene expression values were transformed to  $\log_2(\text{TPM})$  using voom() from limma (Law  
256 et al., 2014). Linear mixed effect models were used to fit the transformed gene expression data  
257 by using lmer() in lme4 (Bates et al., 2015). The model included fixed effect for cell  
258 subpopulation, RIN, the three surrogate variables, and random effect for each animal. One minus  
259 Spearman correlation coefficient was used as distance measure for gene clustering, and Euclidian  
260 distances was used for sample clustering.

261 Additionally, Spearman correlation analysis was performed to assess the correlation  
262 between bulkRNA-seq and NanoString results. The significant level was set at  $P < 0.05$ , and the  
263 level of Spearman's rank correlation coefficient ( $\rho$ ) was defined as described above.

264

### 265 **scRNA-seq library preparation**

266 PBMC isolation experiments were performed at different times and samples sequenced in  
267 different runs. For ExpB,  $1 \times 10^7$  viable PBMCs per animal were cryopreserved according to 10X  
268 Genomics Sample Preparation Demonstrated Protocol, shipped on dry ice to University of  
269 Minnesota's Core Sequencing Facility, and thawed, partitioned, and scRNA-seq libraries  
270 prepared. For ExpC/ExpD, freshly isolated PBMCs were transported on ice to Iowa State  
271 University Core Sequencing Facility for partitioning and library preparation. Partitioning and  
272 library preparation were performed according to Chromium Single Cell 3' Reagent Kits v2 User  
273 Guide (10X Genomics). For all experiments, 100 base paired-end reads were sequenced on an

274 Illumina HiSeq3000 at ISU Core Sequencing Facility. One sample from ExpB was omitted from  
275 further analyses due to poor sequence performance.

276

## 277 **scRNA-seq data analysis**

### 278 ***Read alignment/gene quantification***

279 Raw read quality was checked with FASTQC<sup>1</sup>. Reads 2 (R2) were corrected for errors  
280 using Rcorrector (Song and Florea, 2015), and 3' polyA tails >10 bases were trimmed. After  
281 trimming, R2 >25 bases were re-paired using BBMap<sup>2</sup>. *Sus scrofa* genome Sscrofa 11.1 and  
282 annotation GTF (v11.1.97) from Ensembl were used to build the reference genome index (Yates  
283 et al., 2020). The annotation file was modified to include both gene symbol (if available) and  
284 Ensembl ID as gene reference (e.g. GZMA\_ENSSSCG00000016903) using custom Perl scripts.  
285 Processed paired-end reads were aligned and gene expression count matrices generated using  
286 CellRanger (v4.0; 10X Genomics) with default parameters. Only reads that were confidently  
287 mapped (MAPQ=255), non-PCR duplicates with valid barcodes, and unique molecular  
288 identifiers (UMIs) were used to generate gene expression count matrices. Reads with same cell  
289 barcodes, same UMIs, and/or mapped to the same gene feature were collapsed into a single read.

290

### 291 ***Quality control/filtering***

292 CellRanger output files were used to remove ambient RNA from each sample with  
293 SoupX (Young and Behjati, 2020) function autoEstCont(). Corrected non-integer gene count  
294 matrices were outputted in CellRanger file format using DropletUtils (Lun et al., 2019) function  
295 write10xCounts() and used for further analyses. Non-expressed genes (sum zero across all

---

<sup>1</sup> <http://www.bioinformatics.babraham.ac.uk/projects/fastqc>

<sup>2</sup> <https://jgi.doe.gov/data-and-tools/bbtools/bb-tools-user-guide/bbmap-guide/>

296 samples) and poor quality cells (>10% mitochondrial genes, <500 genes, or <1,000 UMIs per  
297 cell) were removed using custom R scripts and Seurat (Stuart et al., 2019). Filtered count  
298 matrices were generated using write10xCounts() and used for further analyses. High probability  
299 doublets were removed using Scrublet (Wolock et al., 2019), specifying 0.07 expected doublet  
300 rate and doublet score threshold of 0.25.

301

### 302 *Integration, visualization, and clustering*

303 Post-quality control/filtering gene counts/cells from each sample were loaded into a  
304 Seurat object and transformed individually using SCTransform(). Data were integrated with  
305 SelectIntegrationFeatures(), PrepSCTIntegration(), FindIntegrationAnchors(), and  
306 IntegrateData() with default parameters. PCA was conducted with RunPCA(), and the first 14  
307 principal components (PCs) were selected as significant based on <0.1% variation of successive  
308 PCs. Significant PCs were used to generate two-dimensional t-distributed stochastic neighbor  
309 embedding (t-SNE) and uniform manifold approximation and projection (UMAP) coordinates  
310 for visualization with RunTSNE() and RunUMAP(), respectively, identify nearest neighbors and  
311 clusters with FindNeighbors() and FindClusters() (clustering resolution = 1.85), respectively, and  
312 perform hierarchical clustering with BuildClusterTree(). Counts in the RNA assay were further  
313 normalized and scaled using NormalizeData() and ScaleData().

314

### 315 *Differential Gene Expression (DGE) analyses*

316 Normalized counts from the RNA assay were used for DGE analyses. Differentially-  
317 expressed genes (DEGs) between pairwise cluster combinations were calculated using  
318 FindMarkers(). DEGs in one cluster relative to the average of all other cells in the dataset were

319 calculated using FindAllMarkers(). The default Wilcoxon Rank Sum test was used for DGE  
320 analyses. Genes expressed in >20% of cells within one of the cell populations being compared,  
321 with  $|\log_{2}FC| > 0.25$ , and adjusted p-value  $< 0.05$  were considered DEGs.

322

### 323 ***Gene set enrichment analyses (GSEA)***

324 Enrichment of gene sets within our porcine scRNA-seq dataset were performed using  
325 AUCell (v1.10.0) (Aibar et al., 2017). Enriched genes in sorted porcine bulkRNA-seq  
326 populations were identified as described in preceding methods. Log<sub>2</sub>FC values were used to  
327 curate gene sets of genes enriched in the top 25%, 20%, 15%, 10%, 5%, or 1% of bulkRNA-seq  
328 populations. Gene sets from human bulkRNA-seq cell populations (Choi et al., 2019) were  
329 recovered by performing a High Expression Search on the Haemosphere website<sup>1</sup>, setting  
330 Dataset=Haemopedia-Human-RNASEq and Sample group=celltype. Gene sets for CD4:+ T-cell;  
331 CD8:+ T-cell; Memory B-cell; Monocyte; Myeloid Dendritic Cell; Myeloid Dendritic Cell  
332 CD123+; Naïve B-cell; Natural Killer Cell; and Plasmacytoid Dendritic Cell options  
333 corresponded to CD4T, CD8T, MemoryB, Monocyte, mDC, CD123PmDC, NaïveB, NK, and  
334 pDC designations, respectively. Genes with high expression scores  $> 0.5$  (lower enrichment level)  
335 or  $> 1.0$  (higher enrichment level) were selected and filtered to include only one-to-one gene  
336 orthologs as described in preceding methods. Human gene identifiers were converted to  
337 corresponding porcine gene identifiers or gene names used for scRNA-seq analyses .

338 Within each cell of the finalized scRNA-seq dataset, gene expression was ranked from  
339 raw gene counts. Area under the curve (AUC) scores were calculated from the top 5% of  
340 expressed genes in a cell and the generated gene sets. Higher AUC scores indicated a higher

---

<sup>1</sup> <https://www.haemosphere.org/searches>

341 percentage of genes from a gene set were found amongst the top expressed genes for a cell. For  
342 overlay of AUC scores onto UMAP coordinates of the scRNA-seq dataset, a threshold value was  
343 manually set for each gene set based on AUC score distributions. For visualization by heatmap,  
344 AUC scores were calculated for each cell, scaled relative to all other cells in the dataset, and  
345 average scaled AUC scores were calculated for each cluster.

346

### 347 ***Deconvolution analysis (CIBERSORTx)***

348 To deconvolve cluster-specific cell subsets from bulkRNA-seq of sorted populations,  
349 CIBERSORTx (Newman et al., 2019) was used to derive a signature matrix from scRNA-seq  
350 data. 114 cells were taken from each cluster using the Seurat subset() function and labelled with  
351 corresponding cluster identities. Cluster-labeled cells were used to obtain a single-cell reference  
352 matrix (scREF-matrix) that was used as input and run on CIBERSORTx online server using  
353 “Custom” option. Default values for replicates (5), sampling (0.5), and fraction (0.0) were used.  
354 Additional options for kappa (999), q-value (0.01), and No. Barcode Genes (300-500) were kept  
355 at default values. CIBERSORTx scREF-matrix was used to impute cell fractions from the  
356 bulkRNA-seq of sorted cell population “mixtures”. The mixture file (TPM values) was used as  
357 an input and run on CIBERSORTx online server using the “Impute Cell Fractions” analysis with  
358 the “Custom” option selected, and S-mode batch-correction was applied. Cell fractions were run  
359 in relative mode to normalize results to 100%. The number of permutations to test for  
360 significance were kept at default (100). Resulting output provided estimated percentages of what  
361 scRNA-seq clusters defined each bulkRNA-seq sorted cell population.

362

### 363 ***Reference-based label transfer/mapping and de novo integration/visualization***



364 A CITE-seq dataset of human PBMCs (Hao et al., 2020) was used to transfer cell type  
365 annotations onto our porcine scRNA-seq dataset. Due to the cross-species comparison, we  
366 distilled human reference and pig query datasets to only include 1:1 orthologous gene, and  
367 human reference dataset was re-normalized and integrated mirroring previous methods (Hao et  
368 al., 2020). Each sample of the porcine query dataset was separately normalized using  
369 SCTransform. Anchors were found between the human reference and each pig query sample  
370 using FindTransferAnchors. Identified anchors were used to calculate mapping scores for each  
371 cell using MappingScore. The mapping scores provided a 0-1 confidence value of how well a  
372 porcine cell was represented by the human reference dataset. Prediction scores were calculated  
373 using available level 2 cell types from the human reference dataset. Prediction scores provided a  
374 0-1 percentage value for an individual cell type prediction, based on how many nearby human  
375 cells shared the same cell type annotation that was predicted. Predicted cell annotations were  
376 projected back onto original UMAP of the porcine dataset. Cluster-averaged prediction and  
377 mapping scores were also calculated.

378 In order to identify cells from the porcine dataset that were not well represented by the  
379 human reference dataset the two datasets were integrated to perform *de novo* visualization by  
380 merging the two datasets and their respective sPCAs to create a new UMAP. From two-  
381 dimensional *de novo* UMAP, porcine cells that did not overlap with human cells were identified.

382

### 383 ***Cluster subsetting***

384 For deeper analyses of only subsets of clusters in the scRNA-seq dataset, cells belonging  
385 to only selected clusters were placed in a new Seurat object using subset(). Genes with zero  
386 overall expression in the new data subset were removed using DietSeurat(), and counts were re-

387 scaled with ScaleData(). Original cluster designations and PCs were left intact. UMAP/t-SNE  
388 visualization, hierarchical clustering, and DGE analyses were re-performed as described in the  
389 original analyses. Pairwise DGE analyses were not re-performed.

390

### 391 ***Random Forest (RF) Modeling***

392 The RF models provided an estimate of cluster similarity based on error rates. The R  
393 packages caret<sup>1</sup> and ranger<sup>2</sup> were used to create RF models trained on cluster identities of cells.  
394 A normalized count matrix was used as input data for RF models. Each cell was labeled by its  
395 previously defined cluster. Two different types of models were created: (1) pairwise models  
396 where training data included only cells from two different clusters (ex. Clusters 0 & 3); (2)  
397 models where training data included cells from all clusters of a specified dataset (ex. all  $\gamma\delta$  T cell  
398 clusters). Each model was trained on the cluster identity of each cell, with trees created=500,  
399 target node size = 1, variables=14,386, variables to sample at each split (Mtry)=119. Each tree in  
400 the model is grown from a bootstrap resampling process that calculates an out-of-bag (OOB)  
401 error that provides an efficient and reasonable approximation of the test error. Variable  
402 importance was used to find genes or sets of genes that can be used to identify certain types of  
403 cells or discriminate groups of cells from one another. RF models are advantageous because they  
404 can provide ranked lists of genes most important for discriminating cells between different  
405 clusters. This method was used to identify groups of important genes to supplement single DGE  
406 analyses. Variable importance was assigned by measuring node impurity (Impurity) and using  
407 permutations (Permutation). Features that reduced error in predictive accuracy are ranked as

---

<sup>1</sup> <https://cran.r-project.org/web/packages/caret/caret.pdf>

<sup>2</sup> <https://cran.r-project.org/web/packages/ranger/index.html>

408 more important. High error rate in the model suggests cells from the groups being compared are  
409 more similar to each other, whereas low error rate suggests cells from each cluster are unique.

410

#### 411 *Gene name replacement*

412 Several gene names/Ensembl IDs used for data analysis were replaced in main  
413 text/figures for the following reasons: gene symbol was not available in the annotation file but  
414 was available under the gene description on Ensembl, gene symbol was updated in future  
415 Ensembl releases, or multiple Ensembl IDs corresponded to a single gene symbol. Affected  
416 genes included: ABI3=ENSSSCG0000003522, ABRACL=ENSSSCG00000004145,  
417 AP3S1=ENSSSCG00000037595, CCDC12=ENSSSCG00000011329,  
418 CCL23=ENSSSCG00000033457, CD163L1=ENSSSCG00000034914,  
419 CDNF=ENSSSCG00000039658, CR2=ENSSSCG00000028674,  
420 CRIP1=ENSSSCG00000037142, CRK=ENSSSCG00000038989,  
421 EEF1A1=ENSSSCG00000004489, FCGR3A=ENSSSCG00000036618,  
422 GBP1=ENSSSCG00000024973, GBP7=ENSSSCG00000006919,  
423 GIMAP4=ENSSSCG00000027826, GZMA=ENSSSCG00000016903,  
424 HMGB1=ENSSSCG00000009327, HOPX=ENSSSCG00000008898,  
425 IFITM1=ENSSSCG00000014565, IGLL5=ENSSSCG00000010077,  
426 KLRB1B=ENSSSCG00000034555, KLRC1=ENSSSCG00000000640,  
427 KLRD1=ENSSSCG00000026217, MAGOHB=ENSSSCG00000000635,  
428 MAL=ENSSSCG00000040098, MAN2B1=ENSSSCG00000013720,  
429 MDK=ENSSSCG00000013260, MYL12A=ENSSSCG00000003691,  
430 NT5C3A=ENSSSCG00000022912, PRKCH=ENSSSCG00000005095,

431 PTTG1=ENSSSCG00000017032, RPL14=ENSSSCG00000011272,  
432 RPL22L1=ENSSSCG00000036114, RPL23A=ENSSSCG00000035080,  
433 RPL35A=ENSSSCG00000040273, RPS15A=ENSSSCG00000035768,  
434 RPS19=ENSSSCG0000003042, RPS27A=ENSSSCG00000034617,  
435 RPS3=ENSSSCG00000014855, RPS8=ENSSSCG00000003930,  
436 S100B=ENSSSCG00000026140, SIRPA=ENSSSCG00000028461,  
437 SLA-DQA1=ENSSSCG00000001456, SLA-DRA=ENSSSCG00000001453 (listed as HLA-  
438 DRA in the gene annotation used), SLA-DRB1=ENSSSCG00000001455,  
439 SLPI=ENSSSCG00000022258, SPIB=ENSSSCG00000034211,  
440 TMSB4X=ENSSSCG00000012119, TXN=ENSSSCG00000005453,  
441 WIPF1=ENSSSCG00000027348.

442

## 443 RESULTS

### 444 BulkRNA-seq revealed common and distinct transcriptomes in circulating immune cells

445 Eight immune cell populations (Table 1) were sorted by cell-surface marker phenotypes  
446 for transcriptomic profiling by bulkRNA-seq (Figure 1) using primarily criteria previously  
447 outlined (Gerner et al., 2009b), with some modifications. Our protocol utilized an antibody  
448 reactive to swine workshop cluster 6 (SWC6) protein to identify  $\gamma\delta$  T-cells, but the antibody only  
449 labels CD2<sup>-</sup>  $\gamma\delta$  T-cells (Yang and Parkhouse, 1996; Davis et al., 1998; Stepanova and Sinkora,  
450 2013; Sedlak et al., 2014). CD2<sup>+</sup>  $\gamma\delta$  T-cells were likely sorted into the CD3 $\epsilon$ <sup>+</sup>CD4<sup>-</sup>CD8 $\alpha$ <sup>-</sup>  
451 fraction that was not retained or the CD8T (CD3 $\epsilon$ <sup>+</sup>CD4<sup>-</sup>CD8 $\alpha$ <sup>+</sup>) population (Davis et al., 1998;  
452 Stepanova and Sinkora, 2013; Sedlak et al., 2014). A pan-B-cell marker for pigs is not currently  
453 available, so B-cells are often characterized through a series of negative gates. Cells in the CD3 $\epsilon$ <sup>-</sup>

454 fraction were considered B-cells if they also lacked expression of CD172 $\alpha$  and CD8 $\alpha$ . B-cells  
455 characterized in this manner were further terminally sorted into B-cell populations with or  
456 without CD21 (complement receptor 2) expression (CD21pB and CD21nB, respectively; Figure  
457 1, gates 7 and 8 respectively). We acknowledge that the CD21nB gate likely contained other  
458 circulating cell types that were not sorted through positive gating approaches.

459 Transcriptomic profiles of sorted cell populations were constructed by bulk RNA-seq,  
460 and relationships among porcine immune cell transcriptomes were assessed and visualized  
461 through dimensionality reduction and hierarchical clustering (Figure 2A and 2B and  
462 Supplementary File 1). Specifically, T-cell populations (SWC6gdT, CD4T, CD4CD8T, CD8T),  
463 B-cell populations (CD21pB, CD21nB), myeloid leukocyte populations (Myeloid), and a single  
464 NK cell population (NK) were well separated from each other (Figure 2A) by PCA. Replicates of  
465 specific sorted cell populations clustered most closely together, while within T-cell populations  
466 or B-cell populations, considerable transcriptional similarity was observed (Figure 2B).

467 The total number of expressed genes in each sorted population was similar  
468 (Supplementary File 1). Significantly enriched genes (SEGs) with expression significantly  
469 different and at least 2x greater than the average of all other cell populations (see Methods) were  
470 identified for each sorted population (Supplementary File 2). Notably, around 12-18% of SEGs  
471 are not fully annotated (no symbol/gene name) in the Sscrofa 11.1 genome and annotation  
472 v11.1.97. The SWC6gdT population had the highest number of SEGs (3,591), while the NK  
473 population had the fewest (1,885) (Table 2). SEG lists were queried for corresponding protein  
474 targets used to sort cells, if known, to confirm enrichment of expression of genes corresponding  
475 to protein phenotypes (Figure 2C). Expression of *SIRPA*\* (encoding CD172 $\alpha$ ) had the highest

---

\* Refer to gene name replacement in Methods section

476 fold-change in the Myeloid population, and *CR2* (encoding CD21, *ENSSSCG00000028674*), was  
477 highest in the CD21pB population, as would be predicted based on protein phenotypes. The two  
478 CD4<sup>+</sup> T-cell populations (CD4T and CD4CD8T) had the highest fold-change for *CD4*. The  
479 CD8T population had the highest fold-change for *CD8A*, with CD4CD8T and NK populations  
480 also having near a log<sub>2</sub>FC enrichment value of 5, in line with these populations also expressing  
481 CD8 $\alpha$ . The SWC6gdT population had the highest fold-change for *TRDC*, though CD8T and  
482 CD21nB populations also had enrichment for *TRDC*. As noted previously, it's unlikely our  
483 sorting for  $\gamma\delta$  T-cells based on SWC6 captured all  $\gamma\delta$  T-cells, thus some  $\gamma\delta$  T-cells may be  
484 represented in other sorted populations. Thus, the CD8T population is likely comprised not only  
485 CD8 $\alpha$ <sup>+</sup>  $\alpha\beta$  T-cells, but also potentially SWC6<sup>-</sup>  $\gamma\delta$  T-cells expressing CD8 $\alpha$ .

486 A subset of SEGs (25% highest log<sub>2</sub>FC values) for each sorted population, referred to as  
487 highly enriched genes (HEGs) that distinguish different circulating pig immune cell populations,  
488 were used for data visualization and GO analysis. The log<sub>2</sub>FC values for HEGs were clustered  
489 and visualized in Figure 3 (four CD3 $\epsilon$ <sup>-</sup> populations) and Supplementary Figure 2 (four CD3 $\epsilon$ <sup>+</sup>  
490 populations). GO analyses using HEG lists for each cell population indicated enrichment for  
491 biological processes characteristic of each respective cell population, depicted as networks of  
492 similar terms (Figure 3E-3H, Supplementary File 3, Supplementary Figure. 2E-2H). Terms for  
493 Myeloid HEGs included Myeloid leukocyte activation and response to bacterium (Figure 3E),  
494 and terms for NK HEGs included positive regulation of cell killing and natural killer cell  
495 mediated cytotoxicity (Figure 3F). Many terms enriched for CD21pB HEGs overlapped with  
496 those for CD21nB HEGs, as 38% of HEGs were shared between these populations (Figure 3C,  
497 3D). Thus, top GO terms for B-cells, including adaptive immune response and B-cell  
498 proliferation were present in both populations (Figure 3G and 3D). However, some GO terms

499 were unique to either B-cell population. GO related to B-cell activation, such as positive  
500 regulation of B-cell activation/proliferation processes associated with B-cell receptor signaling,  
501 were identified exclusively for CD21pB HEGs. For CD21nB HEGs, processes associated with  
502 humoral immunity and red blood cell processes such as coagulation or platelet activation were  
503 noted, which could indicate contamination of different cell types given the non-specific cell  
504 sorting approach used for CD21nB cells (Figure 1). For all sorted T-cell populations (CD8T,  
505 CD4T, CD4CD8T and SWC6gdT), HEG lists showed overlap (Supplementary Figure 2A-D).  
506 GO terms included T-cell activation, T-cell receptor signaling pathway, cytokine-cytokine  
507 receptor interaction and biological processes related to cytotoxicity activity (Supplementary  
508 Figure 2E-2F). Overall, GO exploration of HEGs for sorted populations provided evidence that  
509 sorted immune cells represented expected immune cell functions.

510         The TPM values of expressed genes in sorted porcine cells were compared with  
511 orthologous human genes expressed in sorted human naïve hematopoietic cells from the  
512 Haemopedia (Choi et al., 2019) in order to identify cell-specific transcriptome similarities across  
513 species. Gene expression correlations assessed by Spearman's rank correlation indicated highly  
514 significant and moderately strong correlations ( $\rho=0.30-0.43$ ,  $P<2.2e-16$ ) between porcine and  
515 anticipated corresponding human immune cell populations (Supplementary Figure 3,  
516 Supplementary File 4). A closer evaluation of genes reported as canonical cell markers for  
517 different mouse and human peripheral immune cell populations<sup>1</sup> and expression of those genes in  
518 each of the sorted porcine populations revealed several commonalities. Specifically, genes such  
519 as *EBF1*, *CD19*, *MS4A1*, *CD79B*, *PAX5*, *HLA-DOB* (in CD21nB, CD21pB); *CD28* (in CD8T,  
520 CD4T, CD4CD8T); *CD5* (in CD8T, CD4T, CD4CD8T, SWC6gdT); *GZMA*, *GNLY*, *CCL5*,

---

<sup>1</sup> <http://biocc.hrbmu.edu.cn/CellMarker/#>

521 *KLRK1, KLRB1, CD244* (in NK, CD8T); and *VLDLR, NLRP3, CD14, STEAP4, CD163, DEFB1*  
522 (in Myeloid) for human cells showed specific enrichment in respective porcine populations  
523 (Supplementary Figure 4). Thus, additional query confirmed sorted porcine immune cell  
524 populations were equivalent to human counterparts in many ways.

525

### 526 **High homogeneity amongst sorted T-cell and B-cell populations and transcriptomic** 527 **distinctions in Myeloid and NK populations**

528 Pairwise DGE analyses between the cell populations identified genes with transcript  
529 abundance at least 2x higher in one population than in all other populations (adjusted p-value  
530 <0.05, see Methods) which we define as cell type-specific. Consistent with PCA (Figure 2A),  
531 more cell type-specific genes were identified in the Myeloid population than in NK, T or B-cells.  
532 In total, we identified 2, 5, 8, 29, and 397 cell type-specific genes for CD8T, CD21pB,  
533 SWC6gdT, NK, and Myeloid populations, respectively (Table 2, Supplementary Figure 5). GO  
534 analyses using cell type-specific genes for the Myeloid population resulted in enrichment of  
535 terms such as Myeloid leukocyte, cytokine-cytokine receptor interaction, and pattern recognition  
536 receptor activity (Supplementary Figure 5, Supplementary file 3). Next, we determined if the cell  
537 type-specific genes identified were present in the list of HEGs for each population. In total, 2, 2,  
538 5, 14, and 271 cell type-specific genes were identified in respective HEG lists for CD8T,  
539 CD21pB, SWC6gdT, NK, and Myeloid populations, respectively (Table 3), indicating the most  
540 highly-enriched cell type-specific genes were present in NK and Myeloid populations. Cell type-  
541 specific genes could not be identified for the remaining three sorted populations (CD4T,  
542 CD4CD8T, and CD21nB) using the criteria described above, indicating between-population  
543 transcriptional heterogeneity even for these enriched populations.



544 We then explored immune cell transcriptomic patterns to identify genes that could  
545 expand our knowledge of pathways active in specific cell populations, as well as predict new  
546 genes suitable to use for molecular analyses in immunology studies. Of interest, we found a  
547 remarkably high number of HEGs in our Myeloid population (Table 3), including immune-  
548 related genes involved in TLR signaling (*CD14*, *CD36*, *TLR2/3/4/8/9*, *NOD2*) and cytokine  
549 activity (*CSF1R*, *CSF2RA*, *CSF3R*, *IFNGR1*, *IL1B*, *IL1RAP*, *CXCR2*, *CCL21*, *CCL23*,  
550 *TNFRSF1B*, *IL1R2*, *TNFSF13*, *TNFSF13B*, *TNFRSF21*, *CXCL16*, *CCR2*). In NK cells fewer  
551 specific genes were detected than the Myeloid population (Table 3), with genes such as *OTOP2*,  
552 *OTOP3*, *OSPBL3*, *LY6D*, *RET* related to cytotoxic activity, a typical characteristic of NK cells  
553 (Rusmini et al., 2013; Rusmini et al., 2014; Belizário et al., 2018; Costanzo et al., 2018; Tu et al.,  
554 2018; Upadhyay, 2019), although their function in porcine NK cells is unexplored. In CD21pB  
555 cells, the gene for CD21 (*CR2*) used for sorting the B-cell populations was predicted to be a  
556 HEG. The SWC6gdT population showed specific expression of *AVCR2A*, which is a Th17 cell  
557 specific gene in mice (Ihn et al., 2011) and regulates the proliferation of  $\gamma\delta$  T-cells in murine skin  
558 (Antsiferova et al., 2011). The CD8T population specifically expressed *TMIGD2* (a CD28 family  
559 member) and *JAML*, which encode T-cell transmembrane proteins (Zhu et al., 2013; Alvarez et  
560 al., 2015; Krueger et al., 2017).

561 Finally, we compared pair-wise transcriptome differences between our porcine sorted  
562 CD4T and CD8T populations (Supplementary File 2) with the comparable populations from a  
563 previous study (Foissac et al., 2019). Even though the sorting approaches were different, 85% of  
564 the genes more highly expressed in in CD4T compared to CD8T, respectively, were detected by  
565 Foissac and colleagues in their respective CD4<sup>+</sup> to CD8<sup>+</sup> comparison. Similar overlap was found  
566 (87%) for the genes more abundant in the “CD8+ high” list, while little overlap was found in the

567 inverse comparisons (2.5% and 1%), strongly indicating these cell type gene expression patterns  
568 were similar between studies. However, given the lack of identification of cell-type specific  
569 genes for CD4T and CD8T populations, shared gene expression patterns may not be surprising.

570

#### 571 **NanoString assay validated bulkRNA-seq**

572 RNA abundance of each gene target (Supplementary File 5) in each sample was used to  
573 perform a hierarchical clustering analysis (Supplementary Figure 6). Similar to relationships  
574 observed in the bulkRNA-seq dataset, biological replicates clustered most closely together. T-  
575 cell populations (SWC6gdT, CD4T, CD4CD8T, CD8T) were more similar to each other than to  
576 other populations, with the exception of NK cells. RNA abundance for the genes encoding the  
577 marker proteins used for sorting cell populations confirmed cell identity in NanoString assays  
578 (Supplementary Figure 7). RNA abundance for each tested gene and cell population is included  
579 in Supplementary File 5. To validate gene expression levels calculated by bulkRNA-seq, a  
580 Spearman rank correlation analysis was performed between expression values determined by  
581 bulkRNA-seq and NanoString (Supplementary Figure 8). Highly significant and strong  
582 correlation ( $\rho=0.62-0.88$ ,  $p\text{-value}<2.2e-16$ ) was observed for all sorted cell types  
583 (Supplementary File 4). Overall, gene expression estimates in the bulkRNA-seq dataset were  
584 confirmed by using the NanoString assay.

585

#### 586 **Defining the transcriptomic landscape of porcine PBMCs at single-cell resolution**

587 Single-cells from PBMCs of seven conventional pigs were partitioned, sequenced,  
588 clustered, and visualized (Supplementary File 6). In total, the final dataset included 28,810 cells  
589 expressing from 9,176-12,683 genes, and each cell was assigned to one of 36 transcriptionally-

590 distinct clusters (Figure 4A, Supplementary Figure 9A-C; Supplementary File 6). For  
591 identification of general cell types in each cluster, expression levels of genes known to be active  
592 in distinct porcine immune cell populations were mapped across single-cell clusters (Figure 4B-  
593 C). The 36 clusters were deduced to 13 general cell types (Figure 4D) as described below.

594 Monocyte clusters (13, 19, 20, 25, 27) expressed *CSF1R* and genes associated with  
595 microbial recognition (*CD14*, *CD163*, *NLRP3*, *TLR4*), reported as highly expressed by porcine  
596 monocytes (Auray et al., 2016). DC clusters (30, 32) expressed porcine pan-DC marker *FLT3*  
597 and were further classified as conventional DCs (cDCs; cluster 30) by elevated expression of  
598 *FCERIA* and MHCII-encoding genes (*SLA-DRB1\**, *SLA-DRA\**) and pDCs (cluster 32) by  
599 elevated expression of *TCF4*, *XBPI*, *CLEC12A*, *CD93*, *IRF8*, *CD4*, and *CD8B* (Auray et al.,  
600 2016). Co-stimulatory gene *CD86* was expressed by all monocyte and DC clusters as reported  
601 (Auray et al., 2016). *SIRPA\**, encoding CD172 $\alpha$  is expressed by porcine monocytes/DCs (Piriou-  
602 Guzylack and Salmon, 2008; Auray et al., 2016) and used to sort myeloid leukocytes for  
603 bulkRNA-seq above, was minimally expressed in DC clusters.

604 B-cell clusters (2, 7, 8, 10, 11, 15, 16, 23, 26, 33) expressed *CD79A*, *CD19*, and *PAX5*  
605 (Faldyna et al., 2007; Piriou-Guzylack and Salmon, 2008; Bordet et al., 2019). Antibody-  
606 secreting cells (ASCs; cluster 29) expressed *IRF4* and *PRDM*, genes ascribed to immunoglobulin  
607 secretion (Shi et al., 2015; Liu et al., 2020). Detection of *CR2\**, the gene encoding CD21 protein,  
608 was very low in any cluster.

609 Expression of *CD3E*, which encodes pan-T-cell CD3 $\epsilon$  protein, identified T-cell clusters  
610 (0, 3, 4, 5, 6, 9, 12, 14, 17, 18, 21, 22, 24, 28, 31) (Gerner et al., 2009a). Cluster 1 cells largely  
611 lacked *CD3E*, *CD5*, and *CD6* expression, while expressing *CD2*, *CD8A*, *PRFI*, NK receptor-

---

\* Refer to gene name replacement in Methods section

612 encoding genes *KLRB1* (CD161) and *KLRK1* (NKG2D), and NK receptor signaling adaptor  
613 molecules *HCST* (DAP10) and *TYROBP* (DAP12), corresponding to a NK cell designation  
614 (Denyer et al., 2006; Piriou-Guzylack and Salmon, 2008; Gerner et al., 2009a; Toka et al., 2009).  
615  $\gamma\delta$  T-cells were identified by *TRDC* expression, encoding the  $\gamma\delta$ TCR  $\delta$  chain, and were  
616 subdivided into two major subtypes based on presence/absence of *CD2* expression (Stepanova  
617 and Sinkora, 2013; Sedlak et al., 2014) (Piriou-Guzylack and Salmon, 2008; Gerner et al.,  
618 2009a). Clusters 6 and 21 were identified as  $CD2^-$   $\gamma\delta$  T-cells and clusters 24 and 31 as  $CD2^+$   $\gamma\delta$   
619 T-cells. Clusters expressing *CD3E* but not *TRDC* were considered  $\alpha\beta$  T-cells and were further  
620 subdivided based on *CD4* expression (0, 3, 4, 28 classified as  $CD4^+$   $\alpha\beta$  T-cells) or *CD8A* and  
621 *CD8B* expression (9, 12, 14, 18, 22 classified as  $CD8\alpha\beta^+$   $\alpha\beta$  T-cells) (Piriou-Guzylack and  
622 Salmon, 2008; Gerner et al., 2009a). Clusters 5 and 17 were more difficult to fully classify and  
623 likely represented a mixture of cells, with some but not all cells expressing *CD3E*. Cells in  
624 clusters 5 and 17 largely lacked expression of *CD5*, *CD6*, *TRDC*, *CD4*, and *CD8B* but did largely  
625 express *CD2*, *CD8A*, *KLRB1*, and *KLRK1* and were therefore characterized as a mixture of  
626  $CD8\alpha^+$   $\alpha\beta$  T- and NK cells.

627 Cells in cluster 34 could not be characterized well enough to broadly classify as myeloid,  
628 B, T, or NK lineage leukocytes based on the porcine cell markers described and remained  
629 unclassified. Cluster 35 expressed *HBM* and *AHSP*, indicating erythrocytes. Clusters 34 and 35  
630 were still included in further scRNA-seq analyses; however, results pertaining to these clusters  
631 were not discussed.

632

633 **Gene signatures of bulkRNA-seq populations had limitations in resolving single-cell**  
634 **identities**

635 Gene set enrichment analyses (GSEA) using SEG lists defined at different levels of  
636 enrichment for each sorted bulkRNA-seq population (Supplementary File 3, see Methods) was  
637 performed to identify scRNA-seq clusters were likely represented (Figure 5A-B, Supplementary  
638 Figure 10A, Supplementary File 8). Some gene sets had high relative enrichment in anticipated  
639 corresponding scRNA-seq clusters, such as Myeloid gene sets to monocyte/DC clusters,  
640 CD21nB/CD21pB gene sets to B-cell clusters, and SWC6gdT gene sets to CD2<sup>-</sup>  $\gamma\delta$  T-cell  
641 clusters. Interestingly, highest relative enrichment (2.51) for the top 1% of CD21nB SEGs was  
642 noted for ASCs in cluster 29, followed by erythrocytes in cluster 35 (1.68). Within sorted NK  
643 and T-cell populations, some gene sets showed high relative enrichment for their anticipated  
644 corresponding clusters in the scRNA-seq dataset. We also noted off-target relative enrichment  
645 for gene sets in clusters not anticipated to be included in specific sorted cell populations. Cluster  
646 28 had lower relative enrichment for CD4T and CD4CD8T SEG lists at top 5-25% SEG levels (-  
647 0.02 to 0.73) than did several non-CD4<sup>+</sup>  $\alpha\beta$  T-cell clusters. Similar phenomena were observed  
648 for CD8T top 5-25% SEG lists, whereby clusters 1, 24, and 31 had higher relative enrichment for  
649 CD8T SEG lists (0.69 to 1.56) than did clusters 14 or 18 (-0.04 to 0.95 relative enrichment) that  
650 were anticipated to be included in the CD8T population. Clusters 24 and/or 31 showed off-target  
651 relative enrichment for all T/NK gene sets to various degrees, though these cells would not be  
652 expected to make up a sizeable portion of any of those sorted cell populations.

653 Further comparison of porcine bulk and scRNA-seq data by CIBERSORTx  
654 deconvolution analysis largely supported our single-cell cluster designations by predicting which  
655 clusters proportionally represented the bulk RNA-seq data. (Supplemental Figure 10 B,  
656 Supplemental File 7). Several clusters with poor AUC<sub>cell</sub> enrichment for anticipated bulkRNA-  
657 seq gene sets in Figure 5A-B, such as cluster 28, were predicted to constitute considerable

658 proportions of their anticipated cell populations by CIBERSORTx deconvolution analysis.  
659 Additionally, clusters that demonstrated off-target enrichment by AUCell analysis, such as  
660 clusters 1, 9, 22, 24, and 31, were not predicted to be largely present in those off-target  
661 populations using CIBERSORTx. However, CIBERSORTx failed to predict many single-cell  
662 clusters to have notable abundances in any bulkRNA-seq populations, such as clusters 8, 19, 26,  
663 32, and 34 having < 3.33% predicted abundance for any one bulkRNA-seq sample.

664 Additional GSEA comparing gene sets derived from public bulkRNA-seq data of sorted  
665 human PBMC populations with porcine single-cell gene expression profiles informed cluster  
666 identity as it relates to human immune cells (Figure 5C, Supplementary Figure 10C-D,  
667 Supplementary File 9). High relative enrichment for human monocyte gene sets in porcine  
668 monocyte populations, human CD123PmDC gene sets in porcine cDCs, and human pDC gene  
669 sets in porcine pDCs was observed, in general consensus with gene expression profiles of  
670 anticipated corresponding porcine single-cell clusters. NaiveB gene signatures had positive  
671 relative enrichment in all porcine B-cell clusters except cluster 33 at both the 0.5 and 1.0  
672 resolution level, while the MemoryB signature had highest relative enrichment scores for B and  
673 ASC clusters at the 0.5 level, with little relative enrichment at the 1.0 level (likely due to a  
674 limited number of genes in the gene set). Human T/NK gene sets had off-target enrichment very  
675 similar to patterns observed in GSEA with porcine gene sets. Overall, GSEA between human  
676 bulkRNA-seq gene signatures and gene expression profiles of porcine scRNA-seq data supported  
677 many of the same findings when comparing between porcine bulkRNA-seq gene sets and gene  
678 expression profiles of porcine scRNA-seq data. Results indicated limitations of gene profiles  
679 obtained from sorted bulkRNA-seq populations in accurately describing/accounting for  
680 transcriptional heterogeneity resolved by scRNA-seq.

681

## 682 **Integration of porcine and human scRNA-seq datasets to further annotate porcine cells**

683 We examined porcine single-cell identities by comparing the porcine scRNA-seq data to  
684 a highly annotated scRNA-seq dataset of human PBMCs, providing a higher level of resolution  
685 than available with bulkRNA-seq. Transfer of more highly-specified human cell type labels onto  
686 porcine cells could reveal the most likely human counterparts for these porcine populations.  
687 Mapping scores were further calculated to determine how well porcine cells were truly  
688 represented by the human dataset (Figure 6A, Supplementary Figure 11A-B, Supplementary File  
689 10.

690 Many porcine clusters had >95% of cells mapping to a specific human cell type, with  
691 average mapping scores >0.9, including monocyte, pDC, cDC, and ASC clusters, suggesting  
692 high congruency between pig and human for these cell types (Figure 6B). All porcine B-cell  
693 clusters, omitting cluster 33, mapped primarily to human B-cell clusters, but average mapping  
694 scores were slightly lower (0.80-0.87), indicating less ideal representation in the human data. In  
695 addition, every porcine B-cell cluster had overlap with all three human B-cell types (Figure 6A).  
696 Of the porcine CD4<sup>+</sup> αβ T-cells, most cluster 0 cells were predicted as human CD4 naïve cells,  
697 clusters 3 and 4 cells as human CD4 T central memory (TCM) cells, and cluster 28 cells as  
698 human CD4 proliferating cells. From porcine CD8αβ<sup>+</sup> αβ T-cells, clusters 14 and 18 were  
699 largely assigned as human replicating cell types, while 90% of cluster 9 cells were predicted as  
700 human CD8 T effector memory (TEM) cells. Highest cluster 12 predictions were mainly to  
701 human CD4/CD8 naïve T-cells, and cluster 22 cells predicted to match a range of human cell  
702 populations, with the largest percentage predicted as human CD8 TEMs. Porcine CD8α<sup>+</sup> αβ  
703 T/NK and NK clusters had predictions split primarily across human CD8 TEM and NK

704 designations. Porcine CD2<sup>+</sup>  $\gamma\delta$  T-cell clusters 24 and 31 had 74% and 98%, respectively, of cells  
705 predicted as human CD8 TEM, NK, or  $\gamma\delta$  T-cells. Porcine CD2<sup>-</sup>  $\gamma\delta$  T-cell clusters 6 and 21 had  
706 the majority of cells predicted as human CD4 TCM, innate lymphoid cell (ILC), or  $\gamma\delta$  T-cells,  
707 though the average mapping scores were lower for those assigned as CD4 TCM (0.73-0.74) or  
708 gdT (0.74-0.78) than those assigned as ILCs (0.82-0.83) (Supplementary File 10). Overall, cross-  
709 species comparison to a well-annotated human scRNA-seq dataset helped elucidate porcine cell  
710 type identities at a higher resolution than porcine or human bulkRNA-seq datasets (Figure 5),  
711 though some discordance was clearly still present.

712 Several porcine clusters had low mapping scores to a human cell type, indicating the  
713 porcine cells may not be well represented by the human reference dataset (Figure 6B and  
714 Supplementary File 10). Therefore, *de novo* visualization was performed on the combined human  
715 and porcine data, to identify cells in the pig dataset not well represented in the human data  
716 (Figure 6C-D). Porcine clusters could be identified that had low similarity to human cells, and  
717 vice versa (Figure 6C). Specifically, porcine clusters 6, 16, 21, and 33 weakly overlapped human  
718 cells in the two-dimensional *de novo* visualization (compare 6C and 6D). Furthermore, clusters  
719 6, 16, 21, and 33 had lower average mapping scores to any human cell type (Figure 6B).

720

### 721 **Different activation states of porcine CD4<sup>+</sup> $\alpha\beta$ T-cells based on CD8 $\alpha$ expression**

722 We further compared scRNA-seq gene expression profiles amongst only CD4<sup>+</sup>  $\alpha\beta$  T-cell  
723 clusters to gain functional inferences and correspondence to CD8 $\alpha$ <sup>-</sup> versus CD8 $\alpha$ <sup>+</sup> phenotypes  
724 that were used to sort CD4<sup>+</sup>  $\alpha\beta$  T-cells for bulkRNA-seq. CD4<sup>+</sup>  $\alpha\beta$  T-cell clusters (0, 3, 4, 28)  
725 were comprised of 5,082 total cells (Figure 7A). Hierarchical clustering and pairwise DGE  
726 (Supplementary File 7), as well as random forest (RF) analyses, a deep-learning classification



727 method, (see Methods; Supplementary File 11), cumulatively revealed clusters 3 and 4 to be the  
728 most transcriptionally similar to each other. Clusters 3 and 4 had the smallest hierarchical  
729 distance, fewest DEGs (67), and largest RF error rate (19.5) between them, while cluster 28 was  
730 the most distantly related to the other 3 clusters (Figure 7B).

731 *CD8A* gene expression was detected in a subset of cells in the CD4<sup>+</sup> αβ T-cell clusters  
732 (3.5%, 13.1%, 20.9%, 39.7% of cells in clusters 0, 3, 4, 28, respectively; Figure 7C). *CD8A*  
733 expression was significantly greater in clusters 4 and 28 compared to cluster 0 by pairwise DGE  
734 analyses (Supplementary File 7) but not in cluster 3 compared to 0, due to not meeting a  
735 minimum threshold of cells (20%) expressing the gene in either cluster implemented for DGE  
736 analysis. However, cluster 3 had significantly greater expression of *CD8A* compared to cluster 0  
737 when removing the minimum cell expression threshold (average log<sub>2</sub>FC =0.37, adjusted p-value  
738 =5.52x10<sup>-21</sup>). GSEA of DEGs identified by pairwise DGE analysis of CD4T and CD4CD8T  
739 populations recovered from bulkRNA-seq (Supplementary File 2) revealed genes significantly  
740 enriched in CD4T compared to CD4CD8T populations were relatively enriched in cluster 0,  
741 while genes significantly enriched in CD4CD8T compared to CD4T populations showed greater  
742 relative enrichment in clusters 4 and 28 and to a lesser extent in cluster 3 (Figure 7D,  
743 Supplementary File 12).

744 The top genes contributing to overall transcriptional heterogeneity amongst four clusters  
745 of CD4<sup>+</sup> αβ T-cells, as determined by RF analysis (Figure 7 E-F, Supplementary File 13), highly  
746 overlapped with genes identified in overall DGE analysis (Figure 7G, Supplementary File 13).  
747 Of eight genes with mutually highest permutation and impurity scores from overall RF analysis  
748 (Figure 7E-F), one gene had significantly greater expression in cluster 0 compared to all other  
749 clusters (*RPS3A*), while the other seven genes had significantly greater expression in clusters 3,

750 4, and 28 compared to cluster 0 (*FCGR3A\**, *TMSB10*, *COX1*, *S100A6*, *GPX1*, *CRIP1\**, *S100A11*),  
751 as determined by pairwise DGE analyses (Supplementary File 7).

752 Genes associated with a naïve phenotype, including *CCR7*, *SELL*, *LEF1*, and *TCF7*  
753 (Szabo et al., 2019; Kim et al., 2020) had significantly increased expression in cluster 0 (Figure  
754 7G, Supplementary File 9 and 13), in line with the result obtained by comparing to human  
755 scRNA-seq data that indicated a good alignment of cluster 0 with human naïve CD4 T-cells  
756 (Figure 6A). From Figure 6A, clusters 3 and 4 aligned with human CD4 Tcm (central memory)  
757 cells, and cluster 28 aligned with human CD4 proliferating cells. Correspondingly, genes  
758 associated with activation, such as *ITGB1*, *CD40LG*, *IL6R*, and MHC II-associated genes (*CD74*,  
759 *SLA-DRA*, *SLA-DQB1*, *SLA-DRB1\**, *SLA-DQAI\**) (Grewal and Flavell, 1996; Gerner et al.,  
760 2009b; Zemmour et al., 2018; Zhu et al., 2020) had significantly greater expression in clusters 3,  
761 4, and/or 28, and cluster 28 expressed many genes specific for cellular replication and division  
762 (*PCLAF*, *BIRC5*, *TK1*, *PCNA*) (Dabydeen et al., 2019; Giotti et al., 2019) (Figure 7G,  
763 Supplementary File 9 and 13). Overall, we leveraged single-cell gene expression profiles to  
764 confirm likely identity of cluster 0 as naïve CD4<sup>+</sup>CD8α<sup>-</sup> αβ T-cells and clusters 3, 4, and 28 as  
765 potentially previously activated CD4<sup>+</sup>CD8α<sup>+</sup> αβ T-cells.<sup>1</sup>

766

### 767 **Heterogeneity between/amongst CD2<sup>+</sup> and CD2<sup>-</sup> γδ T-cells**

768 Clusters predicted to be porcine γδ T-cells were examined to reveal transcriptional  
769 distinctions within this cell type. Four clusters containing 2,652 cells were previously identified  
770 as CD2<sup>-</sup> γδ T-cells (clusters 6, 21) or CD2<sup>+</sup> γδ T-cells (clusters 24, 31) (Figure 8A). We could

---

\* Refer to gene name replacement in methods

771 further segregate these clusters by *CD2* and *CD8A* expression into  $CD2^-CD8\alpha^-$  (clusters 6, 21),  
772  $CD2^+CD8\alpha^-$  (cluster 24), and  $CD2^+CD8\alpha^+$  (cluster 31) designations used to functionally define  
773 porcine  $\gamma\delta$  T-cells previously (Stepanova and Sinkora, 2013; Sedlak et al., 2014) (Figure 8B).

774  $CD2^-$   $\gamma\delta$  T-cell clusters 6 and 21 were most closely related to one another by hierarchical  
775 clustering, had the fewest pairwise DEGs (30), and had the highest pairwise RF analysis error  
776 rate (23.5), indicating clusters 6 and 21 to be the most transcriptionally similar  $\gamma\delta$  T-cell clusters  
777 of the four clusters (Figure 8C, Supplementary File 7 and 14).  $CD2^+$   $\gamma\delta$  T-cell clusters 24 and 31  
778 were most similar to each other by hierarchical clustering, had the second fewest pairwise DEGs  
779 (236), and had the second highest pairwise RF error rate (5.12), indicating clusters 24 and 31 to  
780 be most similar to each other. When performing pairwise comparison between any  $CD2^-$  and  
781  $CD2^+$   $\gamma\delta$  T-cell clusters, the number of DEGs increased and RF error rates decreased, indicating  
782 greater transcriptional differences between cells of the  $CD2^-$  and  $CD2^+$   $\gamma\delta$  T-cell lineages than  
783 amongst them (Figure 8C, Supplementary File 7 and 14).

784 The top genes contributing to overall transcriptional heterogeneity amongst  $\gamma\delta$  T-cell  
785 clusters, as determined by RF analysis (Figure 8D-E, Supplementary File 14), overlapped with  
786 genes identified with significant and highest logFC expression in overall DGE analysis (Figure  
787 8F, Supplementary File 14). Six of the top seven genes with mutual highest impurity (the best  
788 features that correctly split the data) and permutation scores from RF analysis (Figure 8D-E)  
789 were also DEGs between both  $CD2^-$  compared to both  $CD2^+$   $\gamma\delta$  T-cell clusters by pairwise DGE  
790 analysis (Supplementary File 7), again indicating large transcriptional differences between  $CD2^-$   
791 and  $CD2^+$   $\gamma\delta$  T-cells. In total, 31 genes had significantly greater expression in both  $CD2^-$   
792  $\gamma\delta$  T cell clusters compared to both  $CD2^+$   $\gamma\delta$  T cell clusters, and 49 genes had significantly

793 greater expression in both CD2<sup>+</sup>  $\gamma\delta$  T cell clusters compared to both CD2<sup>-</sup>  $\gamma\delta$  T cell clusters  
794 (Table 4), as determined using the pairwise DGE analyses (Supplementary File 7).

795 Intra-lineage heterogeneity of CD2<sup>-</sup>  $\gamma\delta$  T-cells (between clusters 6 and 21) and CD2<sup>+</sup>  $\gamma\delta$   
796 T-cells (between clusters 24 and 31) demonstrated additional complexity beyond the inter-  
797 lineage heterogeneity between CD2<sup>-</sup> and CD2<sup>+</sup>  $\gamma\delta$  T-cells. Pairwise comparison between clusters  
798 24 and 31 (Supplementary Data 8) revealed 80 genes with significantly greater expression in  
799 cluster 24 (CD2<sup>+</sup>CD8 $\alpha$ <sup>-</sup>  $\gamma\delta$  T-cells) and 156 genes with significantly greater expression in cluster  
800 31 (CD2<sup>+</sup>CD8 $\alpha$ <sup>+</sup>  $\gamma\delta$  T-cells). Genes with the greatest logFC expression (logFC > 1.5) in cluster  
801 31 compared to cluster 24 were related to cellular activation and/or effector functions (*CCL5*,  
802 *GNLY*, *FCGR3A*<sup>\*</sup>, *KLRK1*, *GZMA*<sup>\*</sup>, *NKG7*, *FCER1G*, *GZMB*) (Rincon-Orozco et al., 2005;  
803 Pizzolato et al., 2019; Szabo et al., 2019). Of the 30 DEGs between clusters 6 and 21  
804 (Supplementary Data 8), three genes had significantly greater expression in cluster 6, while 27  
805 genes had significantly greater expression in cluster 21. Several genes with greater expression in  
806 cluster 21 encoded for activation- or stress-induced molecules, including *GPXI*, *LGALS1*,  
807 *ITGB1*, *LTB*, several genes encoding for S100 proteins (*S100A4*, *S100A6*, *S100A10*, *S100A11*),  
808 and genes related to MHCII presentation (*CD74*, *SLA-DRA*<sup>\*</sup>) (Blaser et al., 1998; Ware, 2005;  
809 Gerner et al., 2009b; Steiner et al., 2011; Kesarwani et al., 2013; Siegers, 2018). Genes encoding  
810 transcriptional regulators playing important roles in cell fate determination, including *ID3* and  
811 *GATA3*, had greater expression in cluster 6, while *ID2* expression was significantly greater in  
812 cluster 21 (Blom et al., 1999; Zhang et al., 2014; Rodríguez-Gómez et al., 2019).<sup>1</sup>  
813

---

\* Refer to gene name replacement in methods

## 814 **DISCUSSION**

815           We present the first comprehensive annotation of the global transcriptome of all major  
816 circulating porcine blood mononuclear cells. We applied bulkRNA-seq to determine  
817 transcriptomes of eight sorted PBMC populations and scRNA-seq to annotate transcriptomic  
818 diversity of PBMCs into transcriptionally-distinct clusters. Deep RNA sequencing detected  
819 significant heterogeneity between sorted populations except for T cell populations, while further  
820 heterogeneity was unmasked by scRNA-seq. Collectively, the data sets revealed specific immune  
821 functional expression patterns and highlighted substantial diversity in some subsets, such as T-  
822 cells. The combined approach helps to unite porcine transcriptomics and cellular immunology, as  
823 transcriptional differences and functional relationships of porcine immune cells have remained  
824 unclear due to lack of sufficient reagents to label distinct porcine immune cell populations.  
825 While cross-species comparisons have been done with many RNA-seq datasets of partially  
826 purified cell populations (Kapetanovic et al., 2013; Herrera-Uribe et al., 2020), our new porcine  
827 data demonstrates global similarity to human bulkRNA-seq and scRNA-seq transcriptomes that  
828 can be used to further unravel porcine cell function and extend comparative immune  
829 investigation.

830           Gene expression patterns from the bulkRNA-seq datasets revealed distinct transcript  
831 profiles enriched in biological pathways characteristic of each respective cell population, based  
832 on previous findings in pig and other species (Alter et al., 2004; Palmer et al., 2006; Wang et al.,  
833 2008; Foissac et al., 2019; Monaco et al., 2019; Summers et al., 2020). However, bulkRNA-seq  
834 data from the porcine sorted populations had limited ability to identify genes with specific  
835 transcriptional patterns for some sorted lymphocyte populations. The transcriptomes of eight  
836 different cell types we provide include three types of transcriptomes that have not reported

837 before in pig, including NK, CD21pB and CD21nB. Lists of SEGs, pairwise DGE between all  
838 populations and cell type-specific genes data sets presented here, could be used for further  
839 analysis in other pig or even in cross-species comparisons. Notably, we were able to identify a  
840 large number of HEGs in the Myeloid population. Some HEGs in Myeloid cells were reported as  
841 a Myeloid cell markers in pig (e.g. *CD14* and *CD36*) (Fairbairn et al., 2013) and other HEGs  
842 may be considered as new potential cell markers. Also, in comparison to sorted CD4T and CD8T  
843 populations reported in a previous porcine RNA-seq study (Foissac et al., 2019), we observed  
844 concordant transcriptional patterns in essentially equivalent populations. However, we extended  
845 transcriptional annotation to two additional T-cell populations (CD4CD8T, SWC6gdT), thus  
846 identifying transcriptional differences across more T-cell populations. We demonstrated the  
847 utility of an established NanoString CodeSet (Van Goor et al., 2020; Dong et al., 2021) to  
848 validate RNA-seq results and further profile porcine sorted PBMC populations. At the bulk  
849 RNAseq level, we concluded substantial transcriptional heterogeneity was present across sorted  
850 T-cell and B-cell populations, as fewer enriched or cell type-specific genes were detected. As  
851 described below, the lack of identification of cell type-specific genes was likely caused by the  
852 lack of further sub-setting during sorting to separate functionally distinct cells. However, we  
853 were able to find several specific transcriptional patterns in B- and T-cells using bulkRNA-seq,  
854 and some of the identified genes encode for transmembrane proteins. Beyond further description  
855 of well-annotated genes, we also demonstrated that up to 18% of our predicted cell-type specific  
856 and enriched genes are currently poorly annotated, i.e., genes with no recognized human  
857 ortholog. These data thus increase the functional annotation of these genes, as co-expression  
858 patterns linking such genes with known genes can be an important component for Gene

859 Ontology classifications and disease-association gene prediction (van Dam et al., 2018), and is  
860 an important proposed outcome of the FAANG project (Giuffra et al., 2019).

861         Comparison of our sorted population expression patterns to a similar human RNA-seq  
862 dataset revealed both similarities and differences between species. While we compared the  
863 transcriptomes of the sorted cells with human populations that were isolated using similar cell  
864 markers, we cannot exclude that we are biasing this comparison due to different immunoreagent  
865 markers used across species. However, we did find similar transcriptional patterns across  
866 immune cell populations that are intrinsic to a lineage, such as the porcine Myeloid population  
867 correlating with the human myDC123 population, in agreement with other studies (Auray et al.,  
868 2016).

869         Previous global gene expression studies using either porcine whole blood or specific  
870 immune cell types have failed to thoroughly describe all major PBMC populations (Freeman et  
871 al., 2012; Dawson et al., 2013; Mach et al., 2013; Auray et al., 2016; Foissac et al., 2019).  
872 Providing the transcriptomes of bulk sorted cell populations will be readily useful to the majority  
873 of porcine immunology research labs that use sorting techniques to analyze porcine immune cell  
874 function and RNA expression patterns, as new lists of co-expressed genes in these cell  
875 populations are now available. However, our combined analysis of such bulkRNAseq data with  
876 the scRNAseq data demonstrated that the former approach has significant heterogeneity, limiting  
877 the ability to resolve specific cell types for deeper transcriptional interrogation. A combined  
878 analysis provided evidence confirming our hypothesis that scRNA-seq would lead to  
879 identification of more specific and novel transcriptional signatures to improve annotation and  
880 understanding of circulating porcine immune cells.

881 scRNA-seq provides many noted benefits in transcriptomic analysis, however there are  
882 limitations to the approach. Of benefit, scRNA-seq captured transcriptomes of cells excluded  
883 from our bulkRNA-seq analysis, as scRNA-seq approach did not rely on protein marker  
884 expression and selection of sorting criteria based on specific marker phenotypes. As mentioned  
885 above, scRNA-seq also established that greater levels of cellular heterogeneity exist, since  
886 sequencing was resolved to the level of individual cells rather than a sorted population. We  
887 recognize the scRNAseq-predicted clusters may contain transitory cell states that may be very  
888 challenging to further study for the relationship between cellular function and transcriptional  
889 patterns (Bassler et al., 2019). Further, we assumed single-cell gene expression profiles would be  
890 indicative of protein expression for cell type-specific markers; however, gene expression for  
891 many such markers, including *SIRPA*\* and *CR2*\* that encode proteins used for bulk RNA-seq cell  
892 sorting, was sparse. Sparsity of data is a known limitation of the scRNA-seq approach utilized  
893 herein, while methods such as imputation have been proposed to improve sensitivity (Andrews et  
894 al., 2021). We chose not to use imputation due to our current inability to estimate effects on cell  
895 patterns through comparison to an external reference (Andrews et al., 2021). Thus, these  
896 limitations made it difficult to decipher between low- and non-expression for some genes of  
897 interest, including canonical markers used for identifying cell types in the immunology literature.  
898 Instead, reliance on gene expression profiles of multiple markers was used. For example, *SIRPA*\*  
899 expression was observed at low levels in monocyte clusters but was virtually absent in DC  
900 clusters, though both porcine monocytes and DCs express CD172A protein. Because DCs  
901 express CD172A at lower levels than monocytes (Piriou-Guzylack and Salmon, 2008; Auray et  
902 al., 2016), *SIRPA*\* expression in DCs may have been below our limit of detection using scRNA-

---

\* Refer to gene name replacement in Methods section



903 seq, as it was insufficiently expressed in DCs but not in monocytes. We utilized a droplet-based  
904 partitioning method for scRNA-seq that can detect a large number of cells but a lower number of  
905 transcripts per cell. By this method, we could retain a large number of cells (>25,000 cells from  
906 seven samples) at the expense of limited sequencing depth per cell (minimum of 500 unique  
907 genes and 1,000 unique transcripts per cell). Utilizing higher sequencing depth per cell or  
908 different partitioning platforms for scRNA-seq that have more efficient transcript capture per cell  
909 will be beneficial for deeper analysis of specific cells/genes of interest. It is likely some gene  
910 expression profiles are not predictive of protein expression, due to post-transcriptional regulation  
911 mechanisms. Using newly available co-expression lists to formulate more refined cell sorting  
912 regimens and scRNAseq analysis of such sorted populations will also increase the ability to  
913 define transcriptomes of such cell types (Nestorowa et al., 2016). It was notable that the lists of  
914 genes predicted to be significantly enriched in the 36 scRNAseq clusters had overall a very  
915 similar fraction of poorly annotated genes (average of 18%; cite in Supplementary File 6) to  
916 those predicted for bulkRNAseq, indicating that even the genes with expression patterns  
917 predicted to be more discriminatory contribute a similar level of genome annotation  
918 improvement.

919 We used multiple methods to compare these high-dimensional expression datasets to  
920 further interpret genes predicted to be different between sorted cell populations, between  
921 clusters, or between human and pig. GSEA and/or deconvolution analyses of bulkRNA-seq to  
922 scRNA-seq datasets was only partially effective in correlating sorted populations with assumed  
923 corresponding clusters in the scRNA-seq dataset (regardless of inter-species or intra-species  
924 comparison). At a higher level of resolution, both methods were able to assign most  
925 corresponding cell-type designations between scRNA-seq and bulkRNA-seq data. However,

926 several different scRNA-seq clusters were not predicted to make up a large portion of any  
927 bulkRNA-seq sample. While methodology could account for these differences, it is more likely  
928 that CIBERSORTx was unable to discriminate between certain clusters due to their high  
929 similarity. For example, cells that could have been predicted to be assigned to cluster 8, which  
930 makes up a large proportion of the scRNA-seq data, may have been assigned to other similar B  
931 cell clusters. The ability to discriminate between similar clusters may have been impacted by  
932 down sampling each cluster to include the same number of cells for the analysis. Overall,  
933 deconvolution was useful in assigning cell type level data but in some instances, it could not  
934 fully deconvolute bulk RNAseq to the cluster specific level.

935         Integration of porcine PBMC scRNA-seq with a human PBMC scRNA-seq dataset did  
936 allow further resolution of porcine cluster annotations and yielded high confidence of homology  
937 between many porcine and human single cell populations. While we cannot completely discount  
938 the potential for recognized cell types in our scRNA-seq dataset are not present in sorted  
939 populations used for bulkRNA-seq (or vice-versa), it seems more likely this is similar evidence  
940 to that described above indicating that the same level of resolution simply was not captured by  
941 bulkRNA-seq and could not well represent all cell types found in the scRNA-seq data.  
942 Integration with another scRNA-seq dataset, even when accounting for cross-species  
943 comparison, was in many ways more informative for further annotating porcine single cells,  
944 highlighting the enhanced ability of scRNA-seq to define cellular landscapes. Moreover, cross-  
945 species integration extended our knowledge of comparative immunology between humans and  
946 pigs, as we could identify most similar human counterparts by reference-based prediction.  
947 Conversely, we could also identify clusters of CD2<sup>-</sup> γδ T-cells (clusters 6 and 21) and B-cells  
948 (clusters 16 and 33) that were largely specific to the porcine dataset by *de novo* visualization of

949 clustered cells using the combined human and pig data. The clusters of cells in pig samples either  
950 represent porcine cells either lacking close human cellular counterparts or the equivalent human  
951 counterparts were not well-captured in the human PBMC scRNA-seq dataset.

952 While we did not perform deeper biological query of all cell types identified in our  
953 scRNA-seq dataset, we did attempt to deduce biological significance for the different CD4<sup>+</sup>  
954  $\alpha\beta$  T-cell populations that have unique aspects in pigs. Deeper query of CD4<sup>+</sup>  $\alpha\beta$  T-cells was  
955 performed, as there is functional interest in determining activation states of porcine CD4<sup>+</sup>  $\alpha\beta$  T-  
956 cells based on CD8 $\alpha$  expression, which may be gained upon activation and retained in a memory  
957 state (Summerfield et al., 1996; Zuckermann, 1999; Saalmüller et al., 2002; Gerner et al.,  
958 2009b). We found it difficult to identify CD4<sup>+</sup>  $\alpha\beta$  T-cell clusters as CD8 $\alpha$ <sup>+</sup> or CD8 $\alpha$ <sup>-</sup> due to  
959 sparsity in *CD8A* expression but could leverage comparison of CD4T and CD4CD8T  
960 populations from bulkRNA-seq to formulate gene sets enriched in each CD4 expressing T-cell  
961 population. GSEA helped identify one cluster of CD4<sup>+</sup>CD8 $\alpha$ <sup>-</sup>  $\alpha\beta$  T-cells that corresponded  
962 mostly to human naïve CD4 T-cells, while three clusters of CD4<sup>+</sup>CD8 $\alpha$ <sup>+</sup>  $\alpha\beta$  T-cells  
963 corresponded to human memory or proliferating CD4 T-cells. Collectively, these data reinforce  
964 previous porcine literature, elucidate parallels to human cells, and provide greater insight into the  
965 spectrum of activation states present in CD4<sup>+</sup>CD8 $\alpha$ <sup>+</sup>  $\alpha\beta$  T-cells. Future analysis of activated T-  
966 cells or trajectory analysis may provide even further insight on the transition of activation states  
967 in porcine peripheral T-cells.

968 Pigs are a ‘ $\gamma\delta$  high’ species, named as such because they have a higher proportions of  $\gamma\delta$   
969 T-cells in circulation, largely attributed to the presence of CD2<sup>-</sup>  $\gamma\delta$  T-cells that are absent in  
970 humans and mice (Stepanova and Sinkora, 2013). Three major  $\gamma\delta$  T-cell populations are  
971 characterized in pigs: CD2<sup>-</sup>CD8 $\alpha$ <sup>-</sup>  $\gamma\delta$  T-cells that express SWC6 and CD2<sup>+</sup>CD8 $\alpha$ <sup>-/+</sup>  $\gamma\delta$  T-cells

972 that do not express SWC6, where  $CD2^-CD8\alpha^- \gamma\delta$  T-cells become  $CD2^+CD8\alpha^+$  upon activation  
973 (Stepanova and Sinkora, 2013; Sedlak et al., 2014). As our sorting strategy for bulkRNA-seq  
974 utilized an anti-SWC6 antibody rather than a pan- $\gamma\delta$  T-cell-specific antibody; thus,  $\gamma\delta$  T-cells for  
975 bulk RNA-seq included  $CD2^-CD8\alpha^- \gamma\delta$  T-cells in the SWC6gdT population or  $CD2^+CD8\alpha^+ \gamma\delta$   
976 T-cells found in combination with  $CD4^-CD8\alpha^+ \alpha\beta$  T-cells in the CD8T population.  $CD2^+CD8\alpha^-$   
977  $\gamma\delta$  T-cells were expected to be excluded in cell sorting. In future sorting strategies, it may be  
978 beneficial to utilize a pan- $\gamma\delta$  T-cell reactive antibody and/or identify  $CD4^-CD8^+ \alpha\beta$  T-cells with  
979 anti-CD8 $\beta$  antibody, which should not label with  $CD2^+CD8\alpha^+ \gamma\delta$  T-cells (Gerner et al., 2009b).  
980 though this may still exclude potential  $CD4^-CD8\alpha^+CD8\beta^- \alpha\beta$  T cells, such as we observed in  
981 clusters 5 and 17. Despite limitations in sorting, the bulkRNA-seq profiles were still informative  
982 when comparing to scRNA-seq data. The highest relative enrichment of SWC6gdT gene  
983 signatures was detected in  $CD2^- \gamma\delta$  T-cell clusters, while  $CD2^+ \gamma\delta$  T-cell clusters showed relative  
984 enrichment to a lesser level, indicating some conserved gene expression between  $CD2^-$  and  $CD2^+$   
985  $\gamma\delta$  T-cells. Comparison between  $CD2^+ \gamma\delta$  T-cell clusters further supported previous biological  
986 understanding, where  $CD2^+CD8\alpha^+ \gamma\delta$  T-cells had greater expression of genes related to cellular  
987 activation and cytotoxicity relative to  $CD2^+CD8\alpha^- \gamma\delta$  T-cells (Yang and Parkhouse, 1997;  
988 Stepanova and Sinkora, 2013; Sedlak et al., 2014). On the other hand,  $CD2^- \gamma\delta$  T-cells are less  
989 well described than  $CD2^+ \gamma\delta$  T-cells, largely due to lack of comparable populations in humans or  
990 mice that may be used for biological inference. Integration with human scRNA-seq data  
991 supported previous observations of the absence of  $CD2^- \gamma\delta$  T-cells in humans, as close  
992 counterparts for  $CD2^- \gamma\delta$  T-cell clusters could not be found by *de novo* visualization, and  
993 reference-based integration indicated closest human counterparts to be a mixture of primarily  $\gamma\delta$   
994 T-cells, ILCs, and  $CD4 T_{CMS}$ , and mapping scores were highest for human ILCs rather than  $\gamma\delta$  T-

995 cells, indicating human ILCs to be the closest, albeit still poor, human match. Nonetheless, we  
996 were able to highlight transcriptional distinctions that better annotate CD2<sup>-</sup>  $\gamma\delta$  T-cells, including  
997 DEGs between CD2<sup>-</sup> and CD2<sup>+</sup>  $\gamma\delta$  T-cells that defined the two  $\gamma\delta$  T cell lineages and between  
998 two clusters of CD2<sup>-</sup>  $\gamma\delta$  T-cells that have not yet been described.

999

## 1000 **Conclusion**

1001 This study provides a first-generation atlas annotating circulating porcine immune cell  
1002 transcriptomes at both the cell surface marker-sorted population and single-cell levels. These  
1003 findings illuminate the landscape of immune cell molecular signatures useful for porcine  
1004 immunology and a deeper annotation of the genome, a goal of the FAANG project. These results  
1005 also provide useful resources to identify new porcine cell biomarkers for discrimination and  
1006 isolation of specific cell types, urgently needed in the field.

1007

## 1008 **Abbreviations**

1009 AUC: area under the curve

1010 ASC: antibody-secreting cell

1011 B: B-cell

1012 bulkRNA-seq: bulk RNA sequencing

1013 cDC: conventional dendritic cell

1014 DC: dendritic cell

1015 DEGs: differentially expressed genes

1016 DGE: differential gene expression

1017 Exp: experiment

- 1018 FAANG: Functional Annotation of Animal Genomes
- 1019 FACS: Fluorescent activated cell sorting
- 1020 G2P: Genome-to-Phenome
- 1021 GO: gene ontology
- 1022 GSEA: gene set enrichment analysis/analyses
- 1023 HBSS: Hank's balanced salt solution
- 1024 HEGs: highly enriched genes
- 1025 MACS: Magnetic activated cell sorting
- 1026 mDC/myDC: myeloid dendritic cell
- 1027 n: negative
- 1028 NK: natural killer
- 1029 p: positive
- 1030 PBMC: peripheral blood mononuclear cell
- 1031 PC: principal component
- 1032 PCA: principal component analysis
- 1033 pDC: plasmacytoid dendritic cell
- 1034 RF: random forest
- 1035 RIN: RNA integrity number
- 1036 RNA-seq: RNA sequencing
- 1037 scRNA-seq: single-cell RNA sequencing
- 1038 scREF-matrix: single-cell reference matrix
- 1039 SEG: significantly enriched genes
- 1040 sPCA: supervised principal component analysis

1041 SWC6: swine workshop cluster 6.

1042 T: T-cell.

1043 TCR: T-cell receptor

1044 TPM: transcripts per million

1045 t-SNE: t-distributed stochastic neighbor embedding

1046 UMAP: uniform manifold approximation and projection

1047 UMI: unique molecular identifier

1048  $\gamma\delta$ : Gamma-delta

1049  $\alpha\beta$ : alpha beta

1050

## 1051 **Acknowledgments**

1052 The authors acknowledge the DNA facility of the Iowa State University for provision of  
1053 technical support and sequencing platforms utilized in this study. We are grateful to the NADC  
1054 animal care staff for their efforts. We thank Dr. Catherine Ernst at Michigan State University for  
1055 providing the Yorkshire pigs used in the bulkRNA-seq study. We thank Samuel Humphrey for  
1056 cell sorting technical assistance. We thank Kristen Walker for performing the NanoString data  
1057 collection and initial analyses. We thank Zahra Bond for technical assistance with cell isolation  
1058 and FACS, and Dr. Julian Trachsel for early data visualization assistance.

1059

## 1060 **Author Contributions Statements**

1061 JH, JEW, KAB, and CLL collected samples and isolated cells. KAB performed cell staining and  
1062 FACS. JH performed bulk RNA isolations. JL supervised the NanoString assay data collection.  
1063 JH, LD, and HL performed bulkRNA-seq analyses. HL performed NanoString analyses. JEW,

1064 LD, SKS, and HL performed scRNA-seq analyses. JH, JEW, CLL, and CKT interpreted the data  
1065 and drafted the manuscript. All authors contributed to the writing of the materials and methods,  
1066 edited the manuscript, and approved the final version.

1067

### 1068 **Conflict of Interest Statement**

1069 The authors declare that the research was conducted in the absence of any commercial or  
1070 financial relationships that could be constructed as potential conflict of interest.

1071

### 1072 **Funding**

1073 This work was supported by (1) the National Institute of Food and Agriculture (NIFA) Project  
1074 2018-67015-2701, (2) the NRSP-9 Swine Genome Coordination project, (3) appropriated funds  
1075 from USDA-ARS CRIS project 5030-31320-004-00D, and (4) an appointment to the  
1076 Agricultural Research Service (ARS) Research Participation Program administered by the Oak  
1077 Ridge Institute for Science and Education (ORISE) through an interagency agreement between  
1078 the U.S. Department of Energy (DOE) and the U.S. Department of Agriculture (USDA). ORISE  
1079 is managed by ORAU under DOE contract number DE- SC0014664, (5) USDA ARS CRIS  
1080 Project 8042-32000-102. All opinions expressed in this paper are the authors' and do not  
1081 necessarily reflect the policies and views of USDA, ARS, DOE, or ORAU/ORISE.

### 1082 **Data Availability Statement**

1083 Raw sequencing data from bulkRNA-seq and scRNA-seq are available through the European  
1084 Nucleotide Archive (project: PRJEB43826),  
1085 <https://www.ebi.ac.uk/ena/browser/view/PRJEB43826>.



1086 **REFERENCES**

1087

- 1088 Alter, G., Malenfant, J.M., and Altfeld, M. (2004). CD107a as a functional marker for the  
1089 identification of natural killer cell activity. *J Immunol Methods* 294(1-2), 15-22. doi:  
1090 10.1016/j.jim.2004.08.008.
- 1091 Alvarez, J.I., Kébir, H., Cheslow, L., Charabati, Chabarati, M., Larochele, C., et al. (2015).  
1092 JAML mediates monocyte and CD8 T cell migration across the brain endothelium. *Ann*  
1093 *Clin Transl Neurol* 2(11), 1032-1037. doi: 10.1002/acn3.255.
- 1094 Andersson, L., Archibald, A.L., Bottema, C.D., Brauning, R., Burgess, S.C., Burt, D.W., et al.  
1095 (2015). Coordinated international action to accelerate genome-to-phenome with FAANG,  
1096 the Functional Annotation of Animal Genomes project. *Genome Biol* 16, 57. doi:  
1097 10.1186/s13059-015-0622-4.
- 1098 Andrews, T.S., Kiselev, V.Y., McCarthy, D., and Hemberg, M. (2021). Tutorial: guidelines for  
1099 the computational analysis of single-cell RNA sequencing data. *Nat Protoc* 16(1), 1-9.  
1100 doi: 10.1038/s41596-020-00409-w.
- 1101 Antsiferova, M., Huber, M., Meyer, M., Piwko-Czuchra, A., Ramadan, T., MacLeod, A.S., et al.  
1102 (2011). Activin enhances skin tumourigenesis and malignant progression by inducing a  
1103 pro-tumourigenic immune cell response. *Nat Commun* 2, 576. doi: 10.1038/ncomms1585.
- 1104 Arceo, M., Ernst, C.W., Lunney, J.K., Choi, I., Raney, N.E., Huang, T., et al. (2013).  
1105 Characterizing differential individual response to Porcine Reproductive and Respiratory  
1106 Syndrome Virus infection through statistical and functional analysis of gene expression.  
1107 *Frontiers in Livestock Genomics (Manuscript in preparation)*.
- 1108 Auray, G., Keller, I., Python, S., Gerber, M., Bruggmann, R., Ruggli, N., et al. (2016).  
1109 Characterization and Transcriptomic Analysis of Porcine Blood Conventional and  
1110 Plasmacytoid Dendritic Cells Reveals Striking Species-Specific Differences. *J Immunol*  
1111 197(12), 4791-4806. doi: 10.4049/jimmunol.1600672.
- 1112 Auray, G., Talker, S.C., Keller, I., Python, S., Gerber, M., Liniger, M., et al. (2020). High-  
1113 Resolution Profiling of Innate Immune Responses by Porcine Dendritic Cell Subsets.  
1114 *Front Immunol* 11, 1429. doi: 10.3389/fimmu.2020.01429.
- 1115 Basser, K., Schulte-Schrepping, J., Warnat-Herresthal, S., Aschenbrenner, A.C., and Schultze,  
1116 J.L. (2019). The Myeloid Cell Compartment-Cell by Cell. *Annu Rev Immunol* 37, 269-  
1117 293. doi: 10.1146/annurev-immunol-042718-041728.
- 1118 Bates, D., M<sup>a</sup>, c., Martin, Bolker, B., and Walker, S. (2015). Fitting Linear Mixed-Effects  
1119 Models Using lme4. *Journal of Statistical Software* 67(1), 1-48.
- 1120 Belizário, J.E., Neyra, J.M., and Setúbal Destro Rodrigues, M.F. (2018). When and how NK cell-  
1121 induced programmed cell death benefits immunological protection against intracellular  
1122 pathogen infection. *Innate Immun* 24(8), 452-465. doi: 10.1177/1753425918800200.
- 1123 Benjamini, Y., and Hochberg, Y. (1995). Controlling the false discovery rate: A practical and  
1124 powerful approach to multiple testing. *J R Stat Soc Series B Stat Methodol* 57(1), 289-  
1125 300. doi: 10.2307/2346101.
- 1126 Berry, M.P., Graham, C.M., McNab, F.W., Xu, Z., Bloch, S.A., Oni, T., et al. (2010). An  
1127 interferon-inducible neutrophil-driven blood transcriptional signature in human  
1128 tuberculosis. *Nature* 466(7309), 973-977. doi: nature09247 [pii]  
1129 10.1038/nature09247.

- 1130 Blaser, C., Kaufmann, M., Müller, C., Zimmermann, C., Wells, V., Mallucci, L., et al. (1998).  
1131 Beta-galactoside-binding protein secreted by activated T cells inhibits antigen-induced  
1132 proliferation of T cells. *Eur J Immunol* 28(8), 2311-2319. doi: 10.1002/(SICI)1521-  
1133 4141(199808)28:08<2311::AID-IMMU2311>3.0.CO;2-G.
- 1134 Blom, B., Heemskerk, M.H., Verschuren, M.C., van Dongen, J.J., Stegmann, A.P., Bakker, A.Q.,  
1135 et al. (1999). Disruption of alpha beta but not of gamma delta T cell development by  
1136 overexpression of the helix-loop-helix protein Id3 in committed T cell progenitors.  
1137 *EMBO J* 18(10), 2793-2802. doi: 10.1093/emboj/18.10.2793.
- 1138 Bordet, E., Frénaud, M., Crisci, E., Bouguyon, E., Rault, S., Pezant, J., et al. (2019).  
1139 Macrophage-B Cell Interactions in the Inverted Porcine Lymph Node and Their  
1140 Response to Porcine Reproductive and Respiratory Syndrome Virus. *Front Immunol* 10,  
1141 953. doi: 10.3389/fimmu.2019.00953.
- 1142 Byrne, K.A., Tuggle, C.K., and Loving, C.L. (2020). Differential induction of innate memory in  
1143 porcine monocytes by. *Innate Immun*, 1753425920951607. doi:  
1144 10.1177/1753425920951607.
- 1145 Chaussabel, D., and Baldwin, N. (2014). Democratizing systems immunology with modular  
1146 transcriptional repertoire analyses. *Nat Rev Immunol* 14(4), 271-280. doi: nri3642 [pii]  
1147 10.1038/nri3642.
- 1148 Chaussabel, D., Pascual, V., and Banchereau, J. (2010). Assessing the human immune system  
1149 through blood transcriptomics. *BMC Biol* 8, 84. doi: 10.1186/1741-7007-8-84.
- 1150 Choi, J., Baldwin, T.M., Wong, M., Bolden, J.E., Fairfax, K.A., Lucas, E.C., et al. (2019).  
1151 Haemopedia RNA-seq: a database of gene expression during haematopoiesis in mice and  
1152 humans. *Nucleic Acids Res* 47(D1), D780-D785. doi: 10.1093/nar/gky1020.
- 1153 Costanzo, M.C., Kim, D., Creegan, M., Lal, K.G., Ake, J.A., Currier, J.R., et al. (2018).  
1154 Transcriptomic signatures of NK cells suggest impaired responsiveness in HIV-1  
1155 infection and increased activity post-vaccination. *Nat Commun* 9(1), 1212. doi:  
1156 10.1038/s41467-018-03618-w.
- 1157 Dabydeen, S.A., Desai, A., and Sahoo, D. (2019). Unbiased Boolean analysis of public gene  
1158 expression data for cell cycle gene identification. *Mol Biol Cell* 30(14), 1770-1779. doi:  
1159 10.1091/mbc.E19-01-0013.
- 1160 Davis, W.C., Zuckermann, F.A., Hamilton, M.J., Barbosa, J.I., Saalmüller, A., Binns, R.M., et al.  
1161 (1998). Analysis of monoclonal antibodies that recognize gamma delta T/null cells. *Vet*  
1162 *Immunol Immunopathol* 60(3-4), 305-316. doi: 10.1016/s0165-2427(97)00107-4.
- 1163 Dawson, H.D., Loveland, J.E., Pascal, G., Gilbert, J.G., Uenishi, H., Mann, K.M., et al. (2013).  
1164 Structural and functional annotation of the porcine immunome. *BMC Genomics* 14, 332.  
1165 doi: 10.1186/1471-2164-14-332.
- 1166 Denyer, M.S., Wileman, T.E., Stirling, C.M., Zuber, B., and Takamatsu, H.H. (2006). Perforin  
1167 expression can define CD8 positive lymphocyte subsets in pigs allowing phenotypic and  
1168 functional analysis of natural killer, cytotoxic T, natural killer T and MHC un-restricted  
1169 cytotoxic T-cells. *Vet Immunol Immunopathol* 110(3-4), 279-292. doi:  
1170 10.1016/j.vetimm.2005.10.005.
- 1171 Dong, Q., Lunney, J.K., Lim, K.S., Nguyen, Y., Hess, A.S., Beiki, H., et al. (2021). Gene  
1172 expression in tonsils in swine following infection with porcine reproductive and  
1173 respiratory syndrome virus. *BMC Vet Res* 17(1), 88. doi: 10.1186/s12917-021-02785-1.

- 1174 Durinck, S., Spellman, P.T., Birney, E., and Huber, W. (2009). Mapping identifiers for the  
1175 integration of genomic datasets with the R/Bioconductor package biomaRt. *Nat Protoc*  
1176 4(8), 1184-1191. doi: 10.1038/nprot.2009.97.
- 1177 Fairbairn, L., Kapetanovic, R., Beraldi, D., Sester, D.P., Tuggle, C.K., Archibald, A.L., et al.  
1178 (2013). Comparative analysis of monocyte subsets in the pig. *J Immunol* 190(12), 6389-  
1179 6396. doi: 10.4049/jimmunol.1300365.
- 1180 Faldyna, M., Samankova, P., Leva, L., Cerny, J., Oujezdská, J., Rehakova, Z., et al. (2007).  
1181 Cross-reactive anti-human monoclonal antibodies as a tool for B-cell identification in  
1182 dogs and pigs. *Vet Immunol Immunopathol* 119(1-2), 56-62. doi:  
1183 10.1016/j.vetimm.2007.06.022.
- 1184 Foissac, S., Djebali, S., Munyard, K., Vialaneix, N., Rau, A., Muret, K., et al. (2019). Multi-  
1185 species annotation of transcriptome and chromatin structure in domesticated animals.  
1186 *BMC Biol* 17(1), 108. doi: 10.1186/s12915-019-0726-5.
- 1187 Freeman, T.C., Ivens, A., Baillie, J.K., Beraldi, D., Barnett, M.W., Dorward, D., et al. (2012). A  
1188 gene expression atlas of the domestic pig. *BMC Biol* 10, 90. doi: 10.1186/1741-7007-10-  
1189 90.
- 1190 Gerner, W., Kaser, T., and Saalmuller, A. (2009a). Porcine T lymphocytes and NK cells--an  
1191 update. *Developmental and comparative immunology* 33(3), 310-320. doi:  
1192 10.1016/j.dci.2008.06.003.
- 1193 Gerner, W., Käser, T., and Saalmüller, A. (2009b). Porcine T lymphocytes and NK cells--an  
1194 update. *Dev Comp Immunol* 33(3), 310-320. doi: 10.1016/j.dci.2008.06.003.
- 1195 Gerner, W., Talker, S.C., Koinig, H.C., Sedlak, C., Mair, K.H., and Saalmuller, A. (2015).  
1196 Phenotypic and functional differentiation of porcine alphabeta T cells: current knowledge  
1197 and available tools. *Mol Immunol* 66(1), 3-13. doi: 10.1016/j.molimm.2014.10.025.
- 1198 Giotti, B., Chen, S.H., Barnett, M.W., Regan, T., Ly, T., Wiemann, S., et al. (2019). Assembly of  
1199 a parts list of the human mitotic cell cycle machinery. *J Mol Cell Biol* 11(8), 703-718.  
1200 doi: 10.1093/jmcb/mjy063.
- 1201 Giuffra, E., Tuggle, C.K., and Consortium, F. (2019). Functional Annotation of Animal  
1202 Genomes (FAANG): Current Achievements and Roadmap. *Annu Rev Anim Biosci* 7, 65-  
1203 88. doi: 10.1146/annurev-animal-020518-114913.
- 1204 Grewal, I.S., and Flavell, R.A. (1996). The role of CD40 ligand in costimulation and T-cell  
1205 activation. *Immunol Rev* 153, 85-106. doi: 10.1111/j.1600-065x.1996.tb00921.x.
- 1206 Hao, Y., Hao, S., Andersen-Nissen, E., Mauck, W., Zheng, S., Butler, A., et al. (2020).  
1207 "Integrated analysis of multimodal single-cell data". (bioRxiv).
- 1208 Herrera-Uribe, J., Liu, H., Byrne, K.A., Bond, Z.F., Loving, C.L., and Tuggle, C.K. (2020).  
1209 Changes in H3K27ac at Gene Regulatory Regions in Porcine Alveolar Macrophages  
1210 Following LPS or PolyIC Exposure. *Front Genet* 11, 817. doi:  
1211 10.3389/fgene.2020.00817.
- 1212 Hicks, S.C., and Irizarry, R.A. (2015). quantro: a data-driven approach to guide the choice of an  
1213 appropriate normalization method. *Genome biology* 16(1), 117-117. doi: 10.1186/s13059-  
1214 015-0679-0.
- 1215 Hicks, S.C., Okrah, K., Paulson, J.N., Quackenbush, J., Irizarry, R.A., and Bravo, H.C. (2018).  
1216 Smooth quantile normalization. *Biostatistics (Oxford, England)* 19(2), 185-198. doi:  
1217 10.1093/biostatistics/kxx028.
- 1218 Huang, T.H., Uthe, J.J., Bearson, S.M., Demirkale, C.Y., Nettleton, D., Knetter, S., et al. (2011).  
1219 Distinct peripheral blood RNA responses to Salmonella in pigs differing in Salmonella

- 1220 shedding levels: intersection of IFNG, TLR and miRNA pathways. *PLoS One* 6(12),  
1221 e28768. doi: 10.1371/journal.pone.0028768.
- 1222 Ihn, H.J., Kim, D.H., Oh, S.S., Moon, C., Chung, J.W., Song, H., et al. (2011). Identification of  
1223 Acvr2a as a Th17 cell-specific gene induced during Th17 differentiation. *Biosci*  
1224 *Biotechnol Biochem* 75(11), 2138-2141. doi: 10.1271/bbb.110436.
- 1225 Kapetanovic, R., Fairbairn, L., Downing, A., Beraldi, D., Sester, D.P., Freeman, T.C., et al.  
1226 (2013). The impact of breed and tissue compartment on the response of pig macrophages  
1227 to lipopolysaccharide. *BMC Genomics* 14, 581. doi: 10.1186/1471-2164-14-581.
- 1228 Kesarwani, P., Murali, A.K., Al-Khami, A.A., and Mehrotra, S. (2013). Redox regulation of T-  
1229 cell function: from molecular mechanisms to significance in human health and disease.  
1230 *Antioxid Redox Signal* 18(12), 1497-1534. doi: 10.1089/ars.2011.4073.
- 1231 Kim, C., Jin, J., Weyand, C.M., and Goronzy, J.J. (2020). The Transcription Factor TCF1 in T  
1232 Cell Differentiation and Aging. *Int J Mol Sci* 21(18). doi: 10.3390/ijms21186497.
- 1233 Knetter, S.M., Bearson, S.M., Huang, T.H., Kurkiewicz, D., Schroyen, M., Nettleton, D., et al.  
1234 (2015). Salmonella enterica serovar Typhimurium-infected pigs with different shedding  
1235 levels exhibit distinct clinical, peripheral cytokine and transcriptomic immune response  
1236 phenotypes. *Innate Immun* 21(3), 227-241. doi: 10.1177/1753425914525812 [pii]  
1237 10.1177/1753425914525812.
- 1238 Kobayashi, E., Hanazono, Y., and Kunita, S. (2018). Swine used in the medical university:  
1239 overview of 20 years of experience. *Exp Anim* 67(1), 7-13. doi: 10.1538/expanim.17-  
1240 0086.
- 1241 Koltjes, J.E., Cole, J.B., Clemmens, R., Dilger, R.N., Kramer, L.M., Lunney, J.K., et al. (2019). A  
1242 Vision for Development and Utilization of High-Throughput Phenotyping and Big Data  
1243 Analytics in Livestock. *Front Genet* 10, 1197. doi: 10.3389/fgene.2019.01197.
- 1244 Krueger, J., Jules, F., Rieder, S.A., and Rudd, C.E. (2017). CD28 family of receptors inter-  
1245 connect in the regulation of T-cells. *Receptors Clin Investig* 4.
- 1246 Law, C.W., Chen, Y., Shi, W., and Smyth, G.K. (2014). voom: Precision weights unlock linear  
1247 model analysis tools for RNA-seq read counts. *Genome Biol* 15. doi: 10.1186/gb-2014-  
1248 15-2-r29.
- 1249 Leek, J.T., Johnson, W.E., Parker, H.S., Jaffe, A.E., and Storey, J.D. (2012). The sva package for  
1250 removing batch effects and other unwanted variation in high-throughput experiments.  
1251 *Bioinformatics* 28(6), 882-883. doi: 10.1093/bioinformatics/bts034.
- 1252 Li, S., Labaj, P.P., Zumbo, P., Sykacek, P., Shi, W., Shi, L., et al. (2014). Detecting and  
1253 correcting systematic variation in large-scale RNA sequencing data. *Nat Biotech* 32(9),  
1254 888-895. doi: 10.1038/nbt.3000  
1255 <http://www.nature.com/nbt/journal/v32/n9/abs/nbt.3000.html#supplementary-information>.
- 1256 Liu, G., Wang, B., Chen, Q., Li, Y., Li, B., Yang, N., et al. (2020). Interleukin (IL)-21 Promotes  
1257 the Differentiation of IgA-Producing Plasma Cells in Porcine Peyer's Patches via the  
1258 JAK-STAT Signaling Pathway. *Front Immunol* 11, 1303. doi:  
1259 10.3389/fimmu.2020.01303.
- 1260 Liu, S., and Trapnell, C. (2016). Single-cell transcriptome sequencing: recent advances and  
1261 remaining challenges. *F1000Res* 5. doi: 10.12688/f1000research.7223.1.
- 1262 Love, M.I., Huber, W., and Anders, S. (2014). Moderated estimation of fold change and  
1263 dispersion for RNA-seq data with DESeq2. *Genome Biology* 15(12), 550. doi:  
1264 10.1186/s13059-014-0550-8.

- 1265 Lun, A.T.L., Riesenfeld, S., Andrews, T., Dao, T.P., Gomes, T., Marioni, J.C., et al. (2019).  
1266 EmptyDrops: distinguishing cells from empty droplets in droplet-based single-cell RNA  
1267 sequencing data. *Genome Biol* 20(1), 63. doi: 10.1186/s13059-019-1662-y.
- 1268 Mach, N., Gao, Y., Lemonnier, G., Lecardonnel, J., Oswald, I.P., Estellé, J., et al. (2013). The  
1269 peripheral blood transcriptome reflects variations in immunity traits in swine: towards the  
1270 identification of biomarkers. *BMC Genomics* 14, 894. doi: 10.1186/1471-2164-14-894.
- 1271 Maroilley, T., Lemonnier, G., Lecardonnel, J., Esquerré, D., Ramayo-Caldas, Y., Mercat, M.J.,  
1272 et al. (2017). Deciphering the genetic regulation of peripheral blood transcriptome in pigs  
1273 through expression genome-wide association study and allele-specific expression  
1274 analysis. *BMC Genomics* 18(1), 967. doi: 10.1186/s12864-017-4354-6.
- 1275 Monaco, G., Lee, B., Xu, W., Mustafah, S., Hwang, Y.Y., Carré, C., et al. (2019). RNA-Seq  
1276 Signatures Normalized by mRNA Abundance Allow Absolute Deconvolution of Human  
1277 Immune Cell Types. *Cell Rep* 26(6), 1627-1640.e1627. doi:  
1278 10.1016/j.celrep.2019.01.041.
- 1279 Munyaka, P.M., Kommadath, A., Fouhse, J., Wilkinson, J., Diether, N., Stothard, P., et al.  
1280 (2019). Characterization of whole blood transcriptome and early-life fecal microbiota in  
1281 high and low responder pigs before, and after vaccination for *Mycoplasma*  
1282 *hyopneumoniae*. *Vaccine* 37(13), 1743-1755. doi: 10.1016/j.vaccine.2019.02.016.
- 1283 Nestorowa, S., Hamey, F.K., Pijuan Sala, B., Diamanti, E., Shepherd, M., Laurenti, E., et al.  
1284 (2016). A single-cell resolution map of mouse hematopoietic stem and progenitor cell  
1285 differentiation. *Blood* 128(8), e20-31. doi: 10.1182/blood-2016-05-716480.
- 1286 Newman, A.M., Steen, C.B., Liu, C.L., Gentles, A.J., Chaudhuri, A.A., Scherer, F., et al. (2019).  
1287 Determining cell type abundance and expression from bulk tissues with digital cytometry.  
1288 *Nat Biotechnol* 37(7), 773-782. doi: 10.1038/s41587-019-0114-2.
- 1289 Palmer, C., Diehn, M., Alizadeh, A.A., and Brown, P.O. (2006). Cell-type specific gene  
1290 expression profiles of leukocytes in human peripheral blood. *BMC Genomics* 7, 115. doi:  
1291 10.1186/1471-2164-7-115.
- 1292 Paulson, J.N., Chen, C.Y., Lopes-Ramos, C.M., Kuijjer, M.L., Platig, J., Sonawane, A.R., et al.  
1293 (2017). Tissue-aware RNA-Seq processing and normalization for heterogeneous and  
1294 sparse data. *BMC Bioinformatics* 18(1), 437. doi: 10.1186/s12859-017-1847-x.
- 1295 Piriou-Guzylack, L., and Salmon, H. (2008). Membrane markers of the immune cells in swine:  
1296 an update. *Vet Res* 39(6), 54. doi: 10.1051/vetres:2008030.
- 1297 Pizzolato, G., Kaminski, H., Tosolini, M., Franchini, D.M., Pont, F., Martins, F., et al. (2019).  
1298 Single-cell RNA sequencing unveils the shared and the distinct cytotoxic hallmarks of  
1299 human TCRV $\delta$ 1 and TCRV $\delta$ 2  $\gamma\delta$  T lymphocytes. *Proc Natl Acad Sci U S A* 116(24),  
1300 11906-11915. doi: 10.1073/pnas.1818488116.
- 1301 Qian Liu, M.M. (2016). Evaluation of methods in removing batch effects on RNA-seq data.  
1302 *Infect Dis Transl Med* 2(1), 3-9. doi: 10.11979/idtm.201601002.
- 1303 Rincon-Orozco, B., Kunzmann, V., Wrobel, P., Kabelitz, D., Steinle, A., and Herrmann, T.  
1304 (2005). Activation of V  $\gamma$  9V  $\delta$  2 T cells by NKG2D. *J Immunol* 175(4), 2144-  
1305 2151. doi: 10.4049/jimmunol.175.4.2144.
- 1306 Rodríguez-Gómez, I.M., Talker, S.C., Käser, T., Stadler, M., Reiter, L., Ladinig, A., et al.  
1307 (2019). Expression of T-Bet, Eomesodermin, and GATA-3 Correlates With Distinct  
1308 Phenotypes and Functional Properties in Porcine  $\gamma\delta$  T Cells. *Front Immunol* 10, 396. doi:  
1309 10.3389/fimmu.2019.00396.

- 1310 Rusmini, M., Griseri, P., Lantieri, F., Matera, I., Hudspeth, K.L., Roberto, A., et al. (2013).  
1311 Induction of RET dependent and independent pro-inflammatory programs in human  
1312 peripheral blood mononuclear cells from Hirschsprung patients. *PLoS One* 8(3), e59066.  
1313 doi: 10.1371/journal.pone.0059066.
- 1314 Rusmini, M., Griseri, P., Matera, I., Pontarini, E., Ravazzolo, R., Mavilio, D., et al. (2014).  
1315 Expression variability and function of the RET gene in adult peripheral blood  
1316 mononuclear cells. *J Cell Physiol* 229(12), 2027-2037. doi: 10.1002/jcp.24660.
- 1317 Saalmüller, A., Werner, T., and Fachinger, V. (2002). T-helper cells from naive to committed.  
1318 *Vet Immunol Immunopathol* 87(3-4), 137-145. doi: 10.1016/s0165-2427(02)00045-4.
- 1319 Schroyen, M., and Tuggle, C.K. (2015). Current transcriptomics in pig immunity research.  
1320 *Mamm Genome* 26(1-2), 1-20. doi: 10.1007/s00335-014-9549-4.
- 1321 Sedlak, C., Patzl, M., Saalmüller, A., and Gerner, W. (2014). CD2 and CD8 $\alpha$  define porcine  $\gamma\delta$  T  
1322 cells with distinct cytokine production profiles. *Dev Comp Immunol* 45(1), 97-106. doi:  
1323 10.1016/j.dci.2014.02.008.
- 1324 Shi, W., Liao, Y., Willis, S.N., Taubenheim, N., Inouye, M., Tarlinton, D.M., et al. (2015).  
1325 Transcriptional profiling of mouse B cell terminal differentiation defines a signature for  
1326 antibody-secreting plasma cells. *Nat Immunol* 16(6), 663-673. doi: 10.1038/ni.3154.
- 1327 Siegers, G.M. (2018). Integral Roles for Integrins in  $\gamma\delta$  T Cell Function. *Front Immunol* 9, 521.  
1328 doi: 10.3389/fimmu.2018.00521.
- 1329 Song, L., and Florea, L. (2015). Rcorrector: efficient and accurate error correction for Illumina  
1330 RNA-seq reads. *Gigascience* 4, 48. doi: 10.1186/s13742-015-0089-y.
- 1331 Steiner, J., Marquardt, N., Pauls, I., Schiltz, K., Rahmoune, H., Bahn, S., et al. (2011). Human  
1332 CD8(+) T cells and NK cells express and secrete S100B upon stimulation. *Brain Behav*  
1333 *Immun* 25(6), 1233-1241. doi: 10.1016/j.bbi.2011.03.015.
- 1334 Stepanova, K., and Sinkora, M. (2013). Porcine  $\gamma\delta$  T lymphocytes can be categorized into two  
1335 functionally and developmentally distinct subsets according to expression of CD2 and  
1336 level of TCR. *J Immunol* 190(5), 2111-2120. doi: 10.4049/jimmunol.1202890.
- 1337 Stuart, T., Butler, A., Hoffman, P., Hafemeister, C., Papalexi, E., Mauck, W.M., et al. (2019).  
1338 Comprehensive Integration of Single-Cell Data. *Cell* 177(7), 1888-1902.e1821. doi:  
1339 10.1016/j.cell.2019.05.031.
- 1340 Summerfield, A., Meurens, F., and Ricklin, M.E. (2015). The immunology of the porcine skin  
1341 and its value as a model for human skin. *Mol Immunol* 66(1), 14-21. doi:  
1342 10.1016/j.molimm.2014.10.023.
- 1343 Summerfield, A., Rziha, H.J., and Saalmüller, A. (1996). Functional characterization of porcine  
1344 CD4+CD8+ extrathymic T lymphocytes. *Cell Immunol* 168(2), 291-296. doi:  
1345 10.1006/cimm.1996.0078.
- 1346 Summers, K.M., Bush, S.J., and Hume, D.A. (2020). Network analysis of transcriptomic  
1347 diversity amongst resident tissue macrophages and dendritic cells in the mouse  
1348 mononuclear phagocyte system. *PLoS Biol* 18(10), e3000859. doi:  
1349 10.1371/journal.pbio.3000859.
- 1350 Sutermeister, B.A., and Darling, E.M. (2019). Considerations for high-yield, high-throughput cell  
1351 enrichment: fluorescence versus magnetic sorting. *Sci Rep* 9(1), 227. doi:  
1352 10.1038/s41598-018-36698-1.
- 1353 Swindle, M.M., Makin, A., Herron, A.J., Clubb, F.J., Jr., and Frazier, K.S. (2012). Swine as  
1354 models in biomedical research and toxicology testing. *Vet Pathol* 49(2), 344-356. doi:  
1355 10.1177/0300985811402846.

- 1356 Szabo, P.A., Levitin, H.M., Miron, M., Snyder, M.E., Senda, T., Yuan, J., et al. (2019). Single-  
1357 cell transcriptomics of human T cells reveals tissue and activation signatures in health  
1358 and disease. *Nat Commun* 10(1), 4706. doi: 10.1038/s41467-019-12464-3.
- 1359 Takamatsu, H.H., Denyer, M.S., Stirling, C., Cox, S., Aggarwal, N., Dash, P., et al. (2006).  
1360 Porcine gammadelta T cells: possible roles on the innate and adaptive immune responses  
1361 following virus infection. *Vet Immunol Immunopathol* 112(1-2), 49-61. doi:  
1362 10.1016/j.vetimm.2006.03.011.
- 1363 Toka, F.N., Nfon, C.K., Dawson, H., and Golde, W.T. (2009). Accessory-cell-mediated  
1364 activation of porcine NK cells by toll-like receptor 7 (TLR7) and TLR8 agonists. *Clin*  
1365 *Vaccine Immunol* 16(6), 866-878. doi: 10.1128/CVI.00035-09.
- 1366 Tsang, J.S., Schwartzberg, P.L., Kotliarov, Y., Biancotto, A., Xie, Z., Germain, R.N., et al.  
1367 (2014). Global analyses of human immune variation reveal baseline predictors of  
1368 postvaccination responses. *Cell* 157(2), 499-513. doi: S0092-8674(14)00406-1 [pii]  
1369 10.1016/j.cell.2014.03.031.
- 1370 Tu, Y.H., Cooper, A.J., Teng, B., Chang, R.B., Artiga, D.J., Turner, H.N., et al. (2018). An  
1371 evolutionarily conserved gene family encodes proton-selective ion channels. *Science*  
1372 359(6379), 1047-1050. doi: 10.1126/science.aao3264.
- 1373 Upadhyay, G. (2019). Emerging Role of Lymphocyte Antigen-6 Family of Genes in Cancer and  
1374 Immune Cells. *Front Immunol* 10, 819. doi: 10.3389/fimmu.2019.00819.
- 1375 van Dam, S., Vösa, U., van der Graaf, A., Franke, L., and de Magalhães, J.P. (2018). Gene co-  
1376 expression analysis for functional classification and gene-disease predictions. *Brief*  
1377 *Bioinform* 19(4), 575-592. doi: 10.1093/bib/bbw139.
- 1378 Van Goor, A., Pasternak, A., Walker, K., Hong, L., Malgarin, C., MacPhee, D.J., et al. (2020).  
1379 Differential responses in placenta and fetal thymus at 12 days post infection elucidate  
1380 mechanisms of viral level and fetal compromise following PRRSV2 infection.
- 1381 Vieira Braga, F.A., Teichmann, S.A., and Chen, X. (2016). Genetics and immunity in the era of  
1382 single-cell genomics. *Hum Mol Genet* 25(R2), R141-R148. doi: 10.1093/hmg/ddw192.
- 1383 Villani, A.C., Satija, R., Reynolds, G., Sarkizova, S., Shekhar, K., Fletcher, J., et al. (2017).  
1384 Single-cell RNA-seq reveals new types of human blood dendritic cells, monocytes, and  
1385 progenitors. *Science* 356(6335). doi: 10.1126/science.aah4573.
- 1386 Wang, H., Horbinski, C., Wu, H., Liu, Y., Sheng, S., Liu, J., et al. (2016). NanoStringDiff: a  
1387 novel statistical method for differential expression analysis based on NanoString  
1388 nCounter data. *Nucleic Acids Res* 44(20), e151. doi: 10.1093/nar/gkw677.
- 1389 Wang, M., Windgassen, D., and Papoutsakis, E.T. (2008). Comparative analysis of  
1390 transcriptional profiling of CD3+, CD4+ and CD8+ T cells identifies novel immune  
1391 response players in T-cell activation. *BMC Genomics* 9, 225. doi: 10.1186/1471-2164-9-  
1392 225.
- 1393 Ware, C.F. (2005). Network communications: lymphotoxins, LIGHT, and TNF. *Annu Rev*  
1394 *Immunol* 23, 787-819. doi: 10.1146/annurev.immunol.23.021704.115719.
- 1395 Warr, A., Affara, N., Aken, B., Beiki, H., Bickhart, D.M., Billis, K., et al. (2020). An improved  
1396 pig reference genome sequence to enable pig genetics and genomics research.  
1397 *Gigascience* 9(6). doi: 10.1093/gigascience/giaa051.
- 1398 Wilson, N.K., and Göttgens, B. (2018). Single-Cell Sequencing in Normal and Malignant  
1399 Hematopoiesis. *Hemasphere* 2(2), e34. doi: 10.1097/HS9.0000000000000034.

- 1400 Wolock, S.L., Lopez, R., and Klein, A.M. (2019). Scrublet: Computational Identification of Cell  
1401 Doublets in Single-Cell Transcriptomic Data. *Cell Syst* 8(4), 281-291.e289. doi:  
1402 10.1016/j.cels.2018.11.005.
- 1403 Yang, H., and Parkhouse, R.M. (1996). Phenotypic classification of porcine lymphocyte  
1404 subpopulations in blood and lymphoid tissues. *Immunology* 89(1), 76-83. doi:  
1405 10.1046/j.1365-2567.1996.d01-705.x.
- 1406 Yang, H., and Parkhouse, R.M. (1997). Differential expression of CD8 epitopes amongst porcine  
1407 CD8-positive functional lymphocyte subsets. *Immunology* 92(1), 45-52. doi:  
1408 10.1046/j.1365-2567.1997.00308.x.
- 1409 Yates, A.D., Achuthan, P., Akanni, W., Allen, J., Alvarez-Jarreta, J., Amode, M.R., et al. (2020).  
1410 Ensembl 2020. *Nucleic Acids Res* 48(D1), D682-D688. doi: 10.1093/nar/gkz966.
- 1411 Young, M.D., and Behjati, S. (2020). SoupX removes ambient RNA contamination from droplet-  
1412 based single-cell RNA sequencing data. *Gigascience* 9(12). doi:  
1413 10.1093/gigascience/giaa151.
- 1414 Zemmour, D., Zilionis, R., Kiner, E., Klein, A.M., Mathis, D., and Benoist, C. (2018). Single-  
1415 cell gene expression reveals a landscape of regulatory T cell phenotypes shaped by the  
1416 TCR. *Nat Immunol* 19(3), 291-301. doi: 10.1038/s41590-018-0051-0.
- 1417 Zhang, B., Lin, Y.Y., Dai, M., and Zhuang, Y. (2014). Id3 and Id2 act as a dual safety  
1418 mechanism in regulating the development and population size of innate-like  $\gamma\delta$  T cells. *J*  
1419 *Immunol* 192(3), 1055-1063. doi: 10.4049/jimmunol.1302694.
- 1420 Zheng, G.X., Terry, J.M., Belgrader, P., Ryvkin, P., Bent, Z.W., Wilson, R., et al. (2017).  
1421 Massively parallel digital transcriptional profiling of single cells. *Nat Commun* 8, 14049.  
1422 doi: 10.1038/ncomms14049.
- 1423 Zhou, Y., Zhou, B., Pache, L., Chang, M., Khodabakhshi, A.H., Tanaseichuk, O., et al. (2019).  
1424 Metascape provides a biologist-oriented resource for the analysis of systems-level  
1425 datasets. *Nat Commun* 10(1), 1523. doi: 10.1038/s41467-019-09234-6.
- 1426 Zhu, L., Yang, P., Zhao, Y., Zhuang, Z., Wang, Z., Song, R., et al. (2020). Single-Cell  
1427 Sequencing of Peripheral Mononuclear Cells Reveals Distinct Immune Response  
1428 Landscapes of COVID-19 and Influenza Patients. *Immunity* 53(3), 685-696.e683. doi:  
1429 10.1016/j.immuni.2020.07.009.
- 1430 Zhu, Y., Yao, S., Iliopoulou, B.P., Han, X., Augustine, M.M., Xu, H., et al. (2013). B7-H5  
1431 costimulates human T cells via CD28H. *Nat Commun* 4, 2043. doi:  
1432 10.1038/ncomms3043.
- 1433 Zuckermann, F.A. (1999). Extrathymic CD4/CD8 double positive T cells. *Veterinary*  
1434 *immunology and immunopathology* 72(1-2), 55-66.
- 1435



1436 **Tables**

1437 **Table 1.** Abbreviations and phenotype information of pig sorted immune cells. <sup>a</sup> Refers to gate in Figure 1. <sup>b</sup> Reagents listed in materials  
 1438 and methods.

| <b>CD3<math>\epsilon</math><sup>+</sup> MACS Fraction</b> |                                |                 |                   |                    |                                        |                                                                                                     |
|-----------------------------------------------------------|--------------------------------|-----------------|-------------------|--------------------|----------------------------------------|-----------------------------------------------------------------------------------------------------|
| <b>Gate<sup>a</sup></b>                                   | <b>Population Abbreviation</b> | <b>Marker</b>   | <b>Clone</b>      | <b>Fluorophore</b> | <b>Company (Catalog #)<sup>b</sup></b> | <b>FACS Sort Criteria</b>                                                                           |
| -                                                         | -                              | Anti mouse IgG1 | RMG1-1            | PE-Cy7             | BioLegend(406614)                      | -                                                                                                   |
| 1                                                         | SWC6gdT                        | SWC6gdT         | MAC320            | APC                | BD(561482)                             | CD3 $\epsilon$ <sup>+</sup> SWC6 <sup>+</sup>                                                       |
| 2                                                         | CD4T                           | CD4             | 74-12-4           | FICT               | BD(559585)                             | CD3 $\epsilon$ <sup>+</sup> SWC6 <sup>-</sup> CD4 <sup>+</sup> CD8 $\alpha$ <sup>-</sup>            |
| 3                                                         | CD4CD8T                        | CD4CD8 $\alpha$ | 74-12-4 / 76-2-11 | FICT / PE          | BD(559585) / BD(559584)                | CD3 $\epsilon$ <sup>+</sup> SWC6 <sup>-</sup> CD4 <sup>+</sup> CD8 $\alpha$ <sup>+</sup>            |
| 4                                                         | CD8T                           | CD8 $\alpha$    | 76-2-11           | PE                 | BD(559584)                             | CD3 $\epsilon$ <sup>+</sup> SWC6 <sup>-</sup> CD4 <sup>-</sup> CD8 $\alpha$ <sup>+</sup>            |
| <b>CD3<math>\epsilon</math><sup>-</sup> MACS Fraction</b> |                                |                 |                   |                    |                                        |                                                                                                     |
| <b>Gate<sup>a</sup></b>                                   | <b>Population Abbreviation</b> | <b>Marker</b>   | <b>Clone</b>      | <b>Fluorophore</b> | <b>Company (Catalog #)<sup>b</sup></b> | <b>FACS Sort Criteria<sup>c</sup></b>                                                               |
| 5                                                         | Myeloid                        | CD172           | 74-22-15A         | FICT               | BD(561498)                             | CD3 $\epsilon$ <sup>-</sup> CD172 $\alpha$ <sup>+</sup> CD8 $\alpha$ <sup>-</sup>                   |
| 6                                                         | NK                             | CD8 $\alpha$    | 76-2-11           | PE                 | BD(559584)                             | CD3 $\epsilon$ <sup>-</sup> CD172 $\alpha$ <sup>-</sup> CD8 $\alpha$ <sup>+</sup>                   |
| 7                                                         | CD21pB                         | CD21            | BB6-11C9.6        | AF647              | Southern Biotech(4530-31)              | CD3 $\epsilon$ <sup>-</sup> CD172 $\alpha$ <sup>-</sup> CD8 $\alpha$ <sup>-</sup> CD21 <sup>+</sup> |
| 8                                                         | CD21nB                         | -               | -                 | -                  | -                                      | CD3 $\epsilon$ <sup>-</sup> CD172 $\alpha$ <sup>-</sup> CD8 $\alpha$ <sup>-</sup> CD21 <sup>-</sup> |

1439

1440

1441 **Table 2.** Cell type-enriched and cell type specific genes identified in pig sorted immune cells.

|      | <b>Cell type</b> | <b>Enriched genes</b> | <b>Genes without symbol</b> | <b>Specific genes</b> | <b>Genes without symbol</b> |
|------|------------------|-----------------------|-----------------------------|-----------------------|-----------------------------|
|      | <b>SWC6gdT</b>   | 3591                  | 481                         | 8                     | 1                           |
|      | <b>CD8T</b>      | 3318                  | 566                         | 2                     | -                           |
|      | <b>CD4CD8T</b>   | 2271                  | 312                         | 0                     | -                           |
|      | <b>CD4T</b>      | 2606                  | 374                         | 0                     | -                           |
|      | <b>NK</b>        | 1855                  | 304                         | 29                    | 5                           |
|      | <b>Myeloid</b>   | 3440                  | 432                         | 397                   | 60                          |
|      | <b>CD21pB</b>    | 2383                  | 432                         | 5                     | 2                           |
| 1442 | <b>CD21nB</b>    | 2456                  | 414                         | 0                     | -                           |

1443

1444 **Table 3.** Specific highly enriched genes in myeloid, NK, CD21pB, SWC6gdT and CD4CD8T-cells.

| Group                                 | Total genes | Gene names                                                                                                                                                                                                                                                                                                                                                                                                                                                                                                                                                                                                                                                                                                                                                                                                                                                                                                                                                                                                                                                                                                                                                                                                                                                                                                                                                                                                                                                                                                                                                                                                                                                                                                                                                                                                                                                                                                                                                                                                                                                                                                                                                                                                                                                                                                                                                                                                                                                                                                                                                                                                                                              |
|---------------------------------------|-------------|---------------------------------------------------------------------------------------------------------------------------------------------------------------------------------------------------------------------------------------------------------------------------------------------------------------------------------------------------------------------------------------------------------------------------------------------------------------------------------------------------------------------------------------------------------------------------------------------------------------------------------------------------------------------------------------------------------------------------------------------------------------------------------------------------------------------------------------------------------------------------------------------------------------------------------------------------------------------------------------------------------------------------------------------------------------------------------------------------------------------------------------------------------------------------------------------------------------------------------------------------------------------------------------------------------------------------------------------------------------------------------------------------------------------------------------------------------------------------------------------------------------------------------------------------------------------------------------------------------------------------------------------------------------------------------------------------------------------------------------------------------------------------------------------------------------------------------------------------------------------------------------------------------------------------------------------------------------------------------------------------------------------------------------------------------------------------------------------------------------------------------------------------------------------------------------------------------------------------------------------------------------------------------------------------------------------------------------------------------------------------------------------------------------------------------------------------------------------------------------------------------------------------------------------------------------------------------------------------------------------------------------------------------|
| Specific Myeloid +<br>Top 25% myeloid | 271         | <i>SLC18A1, ENSSSCG00000025687, KLHL13, PAK1, C1RL, MITF, SIRPB2, ENSSSCG00000014997, HNMT, C5AR1, A2M, TEK, SEL1L3, TSPAN13, ENSSSCG00000035960, ENSSSCG00000039214, ENSSSCG00000003226, APOE, CHST15, DNMI, GAS2L1, SERPING1, COL18A1, CDS1, ENSSSCG00000016184, CRHBP, KCNE3, NCAM1, ABHD12, ENSSSCG00000001850, ENSSSCG00000023479, ASAH1, FNI, ENSSSCG00000003554, ENSSSCG00000038429, GAA, ECE1, SLC46A2, UBTD1, CEBPD, CTSB, ENSSSCG00000031640, ENSSSCG00000037466, PLAC9, CCDC60, DOPEY2, TALDO1, ADAMTSL4, ENSSSCG00000034555, STK3, ENSSSCG00000021675, FAM129B, SIGLECI, SULF2, TRPM2, MGP, CMKLR1, TNFRSF19, DOCK4, ENSSSCG00000027991, ULBP1, SLC11A1, SFXN3, TNFSF13, ENSSSCG00000013380, CD68, KCNQ1, RPS6KA2, CD14, MCF2L, ENSSSCG00000037541, ENSSSCG00000015839, PAM, SERPINB8, TSPAN12, F13A1, SASH1, C9orf72, PLCB4, SH3PXD2B, BLVRA, CXCL2, ADAM28, GPBAR1, CHI3L2, SNX9, LGALS3, SLC2A6, ENSSSCG00000035675, EHD4, ENSSSCG00000039758, UNC13A, ENSSSCG00000038418, C2, PLA2G7, FUCA1, ENSSSCG00000037426, ENSSSCG00000025271, ABCA9, RASGRP4, SLC7A7, VCAN, SLC39A8, ADAP2, SMIM5, DAGLA, RAB11FIP5, ZNF768, ENSSSCG00000007644, CTNND1, ENSSSCG00000022258, ENSSSCG00000017754, STXBPI, ENSSSCG00000027665, MANSCI, RND2, IGSF6, BMX, NLRP12, TPST1, NOD2, TREM1, SEMA6B, JDP2, FAM111B, CIDEB, ENSSSCG00000033457, MMP19, SGK3, CTTNBP2NL, MAPK4, PLAUR, INSIG1, RNASE4, FLVCR2, SCARF1, BCL2L14, ENSSSCG00000026196, MCTP1, WLS, ENSSSCG00000017920, PLOD1, CHPT1, PRCP, ENSSSCG00000013842, SH2D6, CA13, PLCB2, CAPN3, PRAMI, ENSSSCG00000038616, ALOX5, GPNMB, ACVRL1, SMIM3, GPR137B, LAMP1, NR1H3, ARL11, ITGB4, CYSLTR2, CCSER1, NCF2, GPCPD1, PDXK, NACC2, FOLR1, ADGRL2, MERTK, OLFM1, PLXNC1, ECM1, LRRC25, IFIT2, CORO1B, ASAP3, SLC43A3, STEAP4, CAMKK1, CTSS, TMEM47, TTL7, AKR7A2, ENSSSCG00000036342, VIM, TLR8, LIN7A, MPP1, TBXAS1, LIPA, DRAM1, MRC2, TGM3, HEXB, GALM, EREG, JPH4, ANG, QPCT, PPT1, ARRDC4, RAB31, ABHD17C, NFAM1, TLR3, LTB4R, HSD3B7, VDR, ENSSSCG00000010497, CD163, OSCAR, DSC3, LRP6, ENSSSCG00000031951, ENSSSCG00000028635, PSAP, SCPEP1, EPB41L2, ZDHHC9, IL1R2, EXPH5, ENSSSCG00000023264, IFIT5, AGPAT2, NKD2, GUCY1B1, GLUL, COL14A1, TNFRSF1B, SLC16A3, GRN, ENSSSCG00000013100, CEBPA, OLFML2B, TLR4, XG, CCL21, ATF6, SLC49A3, HFE, ACVR1B, IFNGR1, ENSSSCG00000022925, SERPINB10, TCF7L2, ENSSSCG00000008769, ENSSSCG00000016093, UNC93B1, TIMP2, RAMP2, F11R, LGALS8, ENSSSCG00000032723, CFP, ZNF385A, CLIC2, TDRD1, HIP1, ENSSSCG00000026653, GSDMD, CSF1R, NAGK, GAB1, PGD, ENSSSCG00000034639, LRPAP1, DAPK1, ENSSSCG00000039956, GPAT3, GALNTL5, ENSSSCG00000029414</i> |
| Specific NK + Top<br>25% NK           | 14          | <i>OTOP2, B3GNT7, OSBPL3, NR4A3, IGF2BP2, OTOP3, ENSSSCG00000010703, LY6D, RET, TUBB6, ENSSSCG00000033385, ENSSSCG00000036743, PTH1R, SUSDI</i>                                                                                                                                                                                                                                                                                                                                                                                                                                                                                                                                                                                                                                                                                                                                                                                                                                                                                                                                                                                                                                                                                                                                                                                                                                                                                                                                                                                                                                                                                                                                                                                                                                                                                                                                                                                                                                                                                                                                                                                                                                                                                                                                                                                                                                                                                                                                                                                                                                                                                                         |
| Specific CD21pB +<br>Top 25% CD21pB   | 2           | <i>GP2, CR2</i>                                                                                                                                                                                                                                                                                                                                                                                                                                                                                                                                                                                                                                                                                                                                                                                                                                                                                                                                                                                                                                                                                                                                                                                                                                                                                                                                                                                                                                                                                                                                                                                                                                                                                                                                                                                                                                                                                                                                                                                                                                                                                                                                                                                                                                                                                                                                                                                                                                                                                                                                                                                                                                         |
| Specific SWC6gdT +<br>Top 25% SWC6gdT | 5           | <i>TMEM87B, ACVR2A, ENSSSCG00000028443, SLC44A, CASS4</i>                                                                                                                                                                                                                                                                                                                                                                                                                                                                                                                                                                                                                                                                                                                                                                                                                                                                                                                                                                                                                                                                                                                                                                                                                                                                                                                                                                                                                                                                                                                                                                                                                                                                                                                                                                                                                                                                                                                                                                                                                                                                                                                                                                                                                                                                                                                                                                                                                                                                                                                                                                                               |
| Specific CD8T + Top<br>25% CD8T       | 2           | <i>TMIGD2, JAML</i>                                                                                                                                                                                                                                                                                                                                                                                                                                                                                                                                                                                                                                                                                                                                                                                                                                                                                                                                                                                                                                                                                                                                                                                                                                                                                                                                                                                                                                                                                                                                                                                                                                                                                                                                                                                                                                                                                                                                                                                                                                                                                                                                                                                                                                                                                                                                                                                                                                                                                                                                                                                                                                     |

1445

1446

1447 **Table 4.** Genes differentially expressed between both CD2-  $\gamma\delta$  T-cell clusters (clusters 6, 21)

1448 and both CD2+  $\gamma\delta$  T-cell clusters (clusters 24, 31). \* Refer to gene name replacement in methods

| <b>Population with greater gene expression</b> | <b>Genes</b>                                                                                                                                                                                                                                                                                                                                                                                                                                                                                                                                                                                                                                                                                                                                                                                                                                        |
|------------------------------------------------|-----------------------------------------------------------------------------------------------------------------------------------------------------------------------------------------------------------------------------------------------------------------------------------------------------------------------------------------------------------------------------------------------------------------------------------------------------------------------------------------------------------------------------------------------------------------------------------------------------------------------------------------------------------------------------------------------------------------------------------------------------------------------------------------------------------------------------------------------------|
| CD2- $\gamma\delta$ T cells (clusters 6, 21)   | <i>AP3S1*</i> , <i>ANXA1</i> , <i>BLK</i> , <i>CAPG</i> , <i>CDNF*</i> , <i>CD163L1*</i> , <i>EMP3</i> ,<br><i>ENSSSCG00000032017</i> , <i>ENSSSCG00000033734</i> , <i>FCER1A</i> ,<br><i>GATA3</i> , <i>IL6R</i> , <i>ITM2B</i> , <i>LGALS1</i> , <i>LTB</i> , <i>MAN2B1*</i> , <i>MYL12A*</i> ,<br><i>PARK7</i> , <i>PIK3API</i> , <i>PLEKHF2</i> , <i>PPP1CC</i> , <i>RCAN3</i> , <i>RHEX</i> ,<br><i>RPS19*</i> , <i>SAMSNI</i> , <i>SELL</i> , <i>SLC25A24</i> , <i>SRGN</i> , <i>TIMPI</i> , <i>VIM</i> ,<br><i>YBX3</i>                                                                                                                                                                                                                                                                                                                      |
| CD2+ $\gamma\delta$ T cells (clusters 24, 31)  | <i>ABI3*</i> , <i>ACTG1</i> , <i>ARPC1B</i> , <i>ARPC5L</i> , <i>BINI</i> , <i>CAMK4</i> ,<br><i>CCDC12*</i> , <i>CD2</i> , <i>COTL1</i> , <i>CTSD</i> , <i>DYNLRB1</i> ,<br><i>ENSSSCG00000023584</i> , <i>ENSSSCG00000027196</i> ,<br><i>ENSSSCG00000029596</i> , <i>ENSSSCG00000038825</i> , <i>FAM49B</i> ,<br><i>FSCN1</i> , <i>FYB1</i> , <i>GBP7*</i> , <i>GIMAP4*</i> , <i>H2AFV</i> , <i>IFITM1*</i> , <i>IFI6</i> ,<br><i>IKZF2</i> , <i>IKZF3</i> , <i>IL2RB</i> , <i>ISG15</i> , <i>ITGA4</i> , <i>ITGB2</i> , <i>ITM2C</i> ,<br><i>KRAS</i> , <i>LCK</i> , <i>MAGOHB*</i> , <i>NT5C3A*</i> , <i>PIK3R1</i> , <i>PRKCH*</i> ,<br><i>PSIP1</i> , <i>PTPRC</i> , <i>RESF1</i> , <i>S100A1</i> , <i>SLC9A3R1</i> , <i>SMC4</i> , <i>SNRK</i> ,<br><i>STK17B</i> , <i>STMN3</i> , <i>TRAT1</i> , <i>UBAC2</i> , <i>WCRI</i> , <i>WIPF1*</i> |

1449

1450

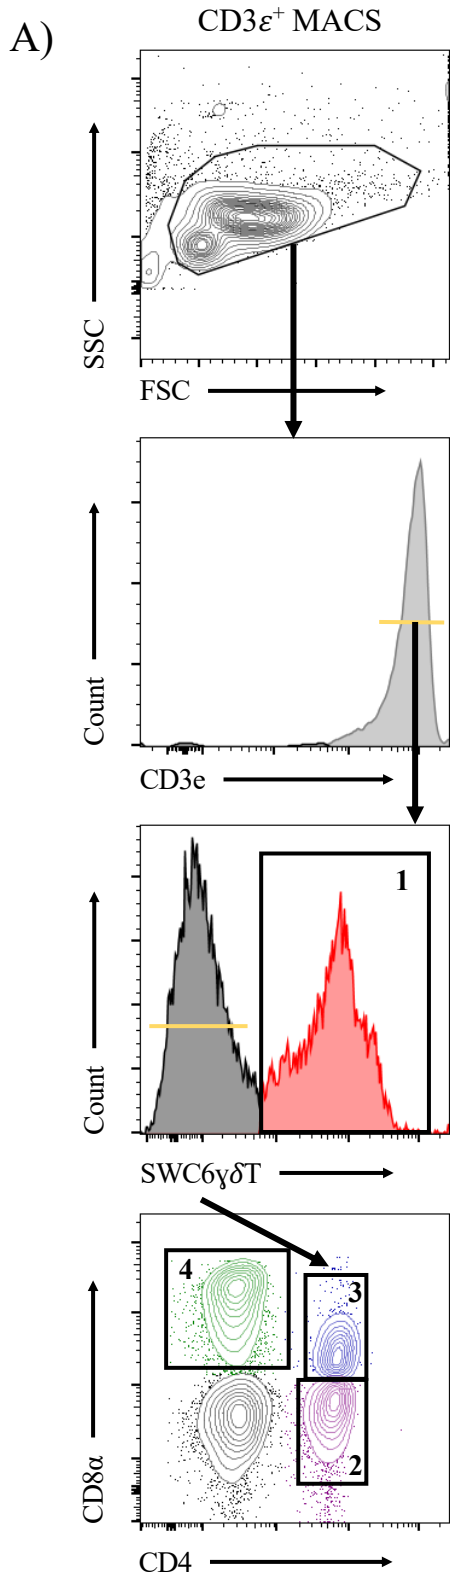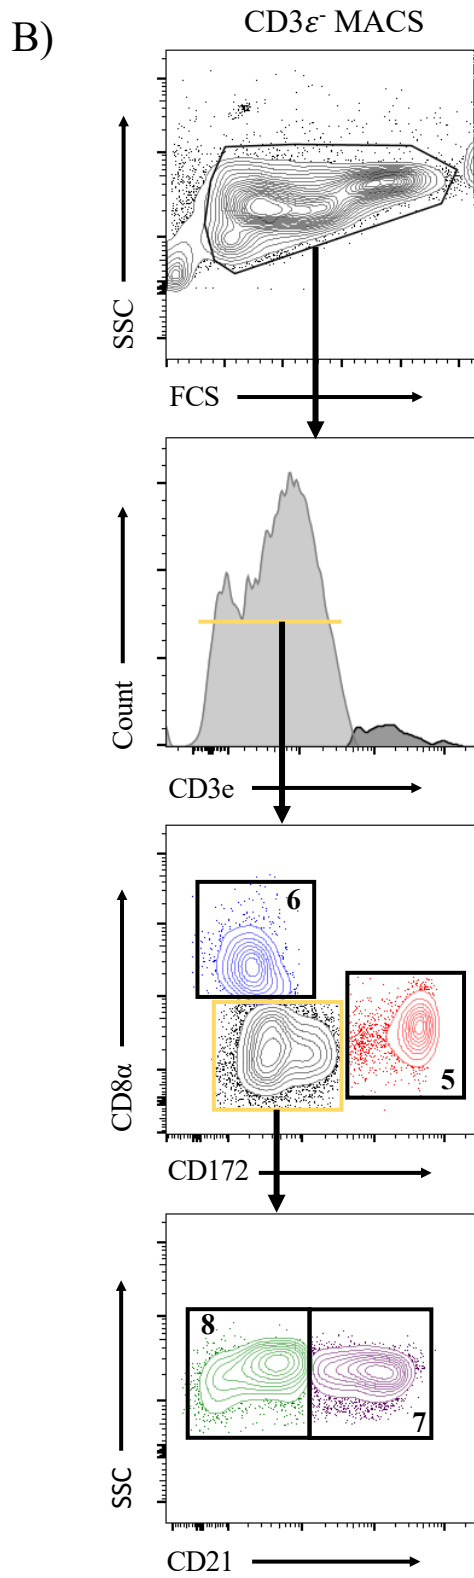

1451 **Figure 1.** Representative plots for fluorescence-activated cell sorting (FACS) isolation of 8  
1452 leukocyte populations from pig peripheral blood mononuclear cells (PBMCs).  
1453 Porcine PBMCs were first subjected to magnetic-activated cell sorting (MACS) to enrich for  
1454 CD3 $\epsilon$ <sup>+</sup> and CD3 $\epsilon$ <sup>-</sup> fractions. **A)** Cells in CD3 $\epsilon$ <sup>+</sup> MACS fraction were FACS gated on FSC vs  
1455 SSC, doublets removed (not shown), and CD3 $\epsilon$ <sup>+</sup> cells were isolated into 4 population: SWC6<sup>+</sup>  
1456  $\gamma\delta$  T-cells (gate 1), and the SWC6<sup>-</sup> cells sorted as CD4<sup>+</sup>CD8 $\alpha$ <sup>-</sup> (gate 2), CD4<sup>+</sup>CD8 $\alpha$ <sup>+</sup> (gate 3),  
1457 CD4<sup>-</sup>CD8 $\alpha$ <sup>+</sup> (gate 4) T-cells. **B)** Cells in CD3 $\epsilon$ <sup>-</sup> MACS fraction were FACS gated on FSC vs  
1458 SSC, doublets removed (not shown), and CD3 $\epsilon$ <sup>-</sup> cells were isolated into 4 populations: CD172 $\alpha$ <sup>+</sup>  
1459 myeloid lineage leukocytes (gate 5), CD8 $\alpha$ <sup>+</sup>CD172<sup>-</sup> NK cells (gate 6), and the remaining CD8 $\alpha$ <sup>-</sup>  
1460 CD172 $\alpha$ <sup>-</sup>, cells were isolated as CD21<sup>+</sup> (gate 7) and CD21<sup>-</sup> (gate 8) B-cells. Table 1 outlines  
1461 abbreviations and sort criteria for each population.  
1462

A)

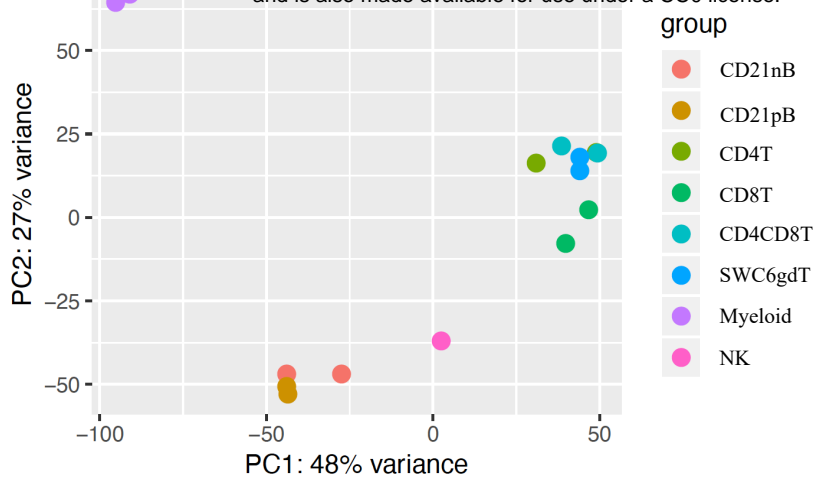

B)

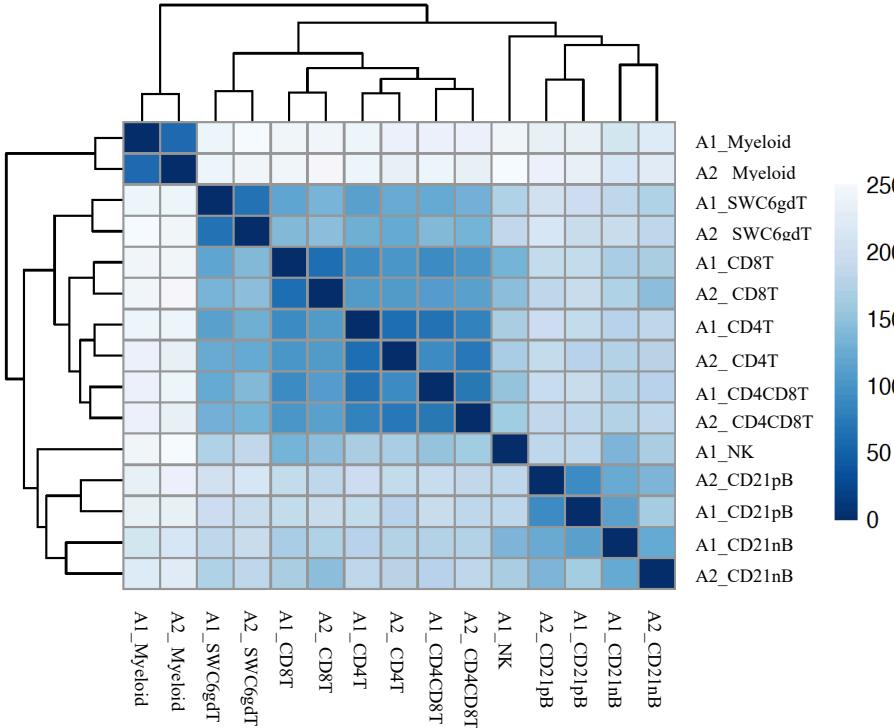

C)

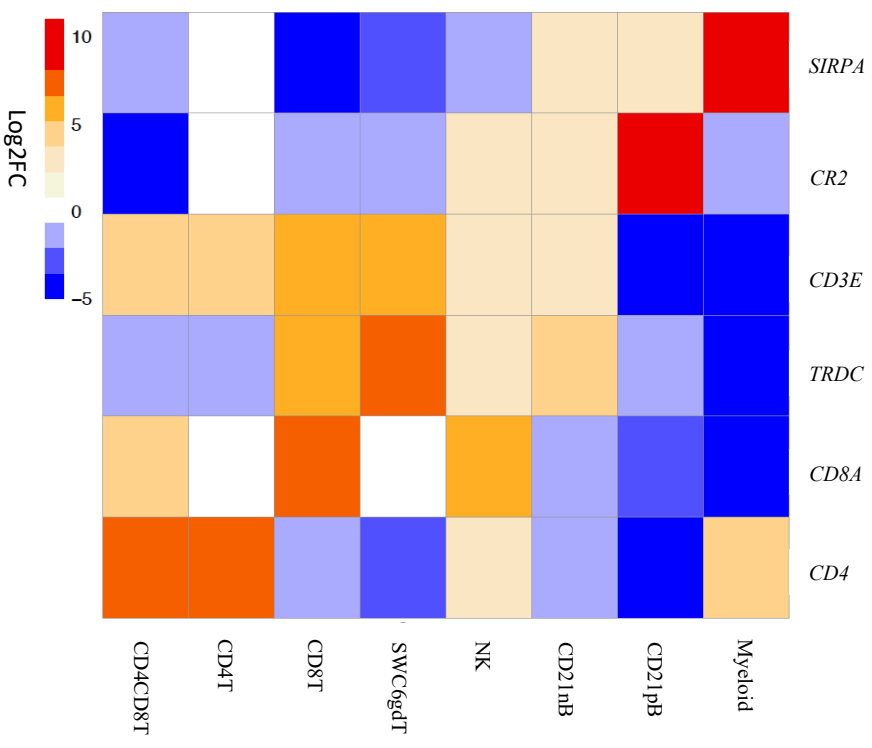

1463 **Figure 2.** Transcriptional expression patterns of immune cells are distinct and cluster more by  
1464 progenitors. **A)** Principal component analysis of transformed RNA-seq reads counts for whole  
1465 transcriptomes. Axis indicate component scores. **B)** Heat map depicting hierarchical clustering of  
1466 sample-to-sample distance. Gene expression for whole transcriptomes were used to calculate  
1467 sample to sample Euclidean distance (color scale) for hierarchical clustering. **C)** Heatmap  
1468 showing cell-type enriched gene values (Log2FC) between sorted immune cells. Gene coding  
1469 proteins that were used for cell sorting were display.  
1470



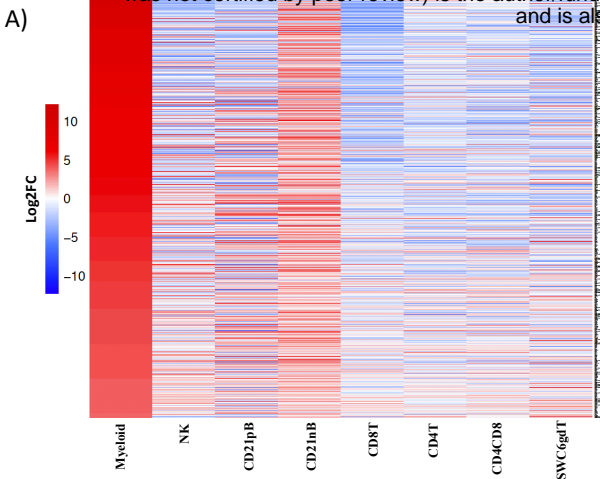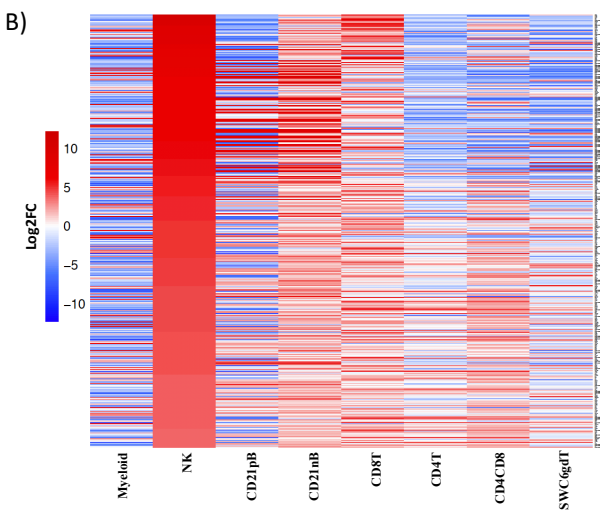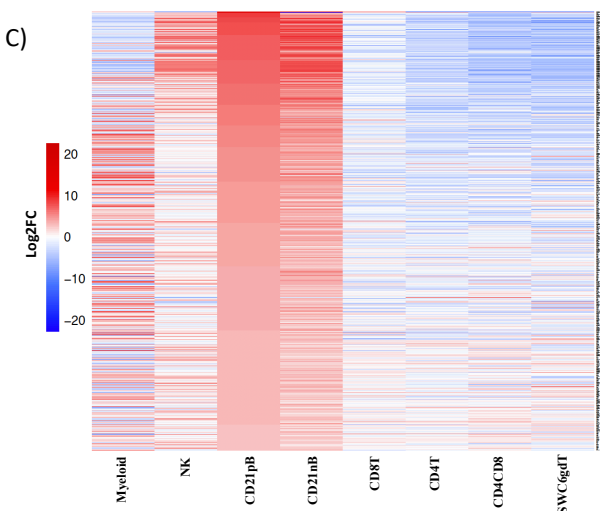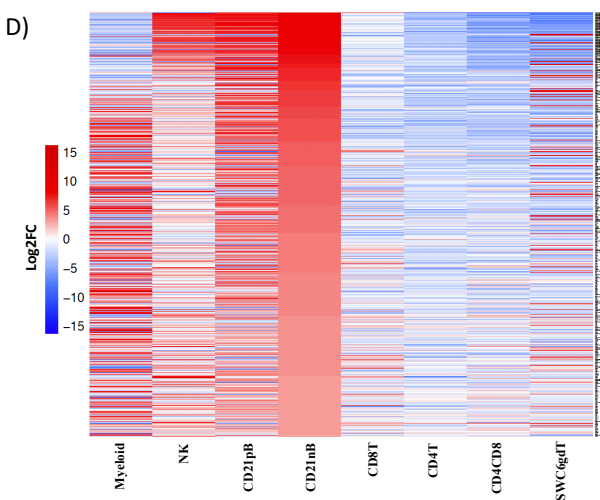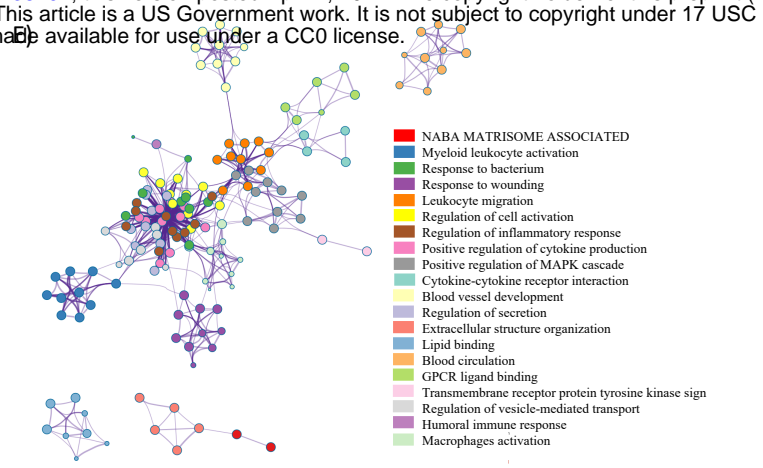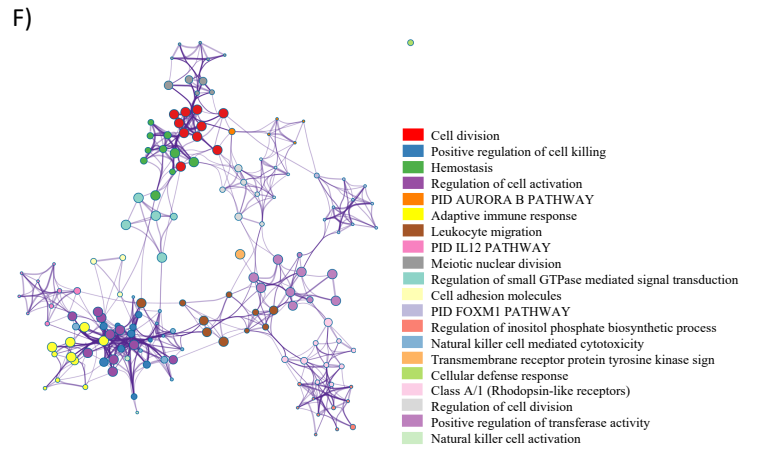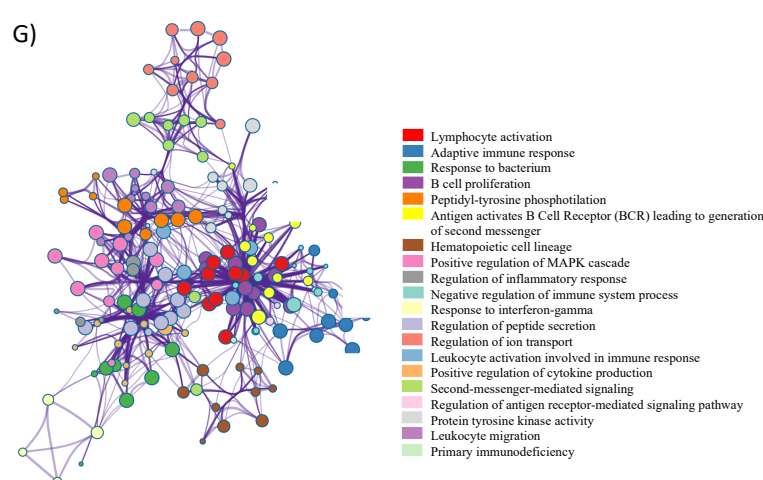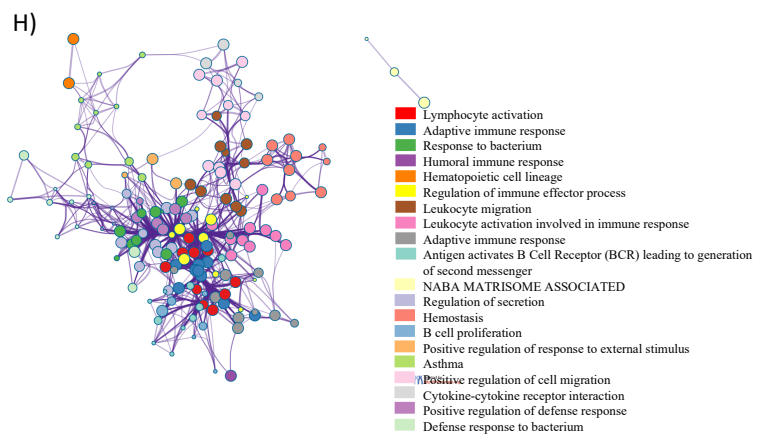

1471 **Figure 3.** Top 25% highly enriched genes in CD3- sorted cells. Heatmap showing in decreasing  
1472 order the top 25% of highly enriched genes in **A)** myeloid, **B)** NK, **C)** CD21pB and **D)** CD21nB-  
1473 cells. Ontology enrichment clusters of the top 25% highly enriched genes of **E)** myeloid, **F)** NK,  
1474 **G)** CD21pB and **H)** CD21nB-cells. The most statistically significant term within similar term  
1475 cluster was chosen to represent the cluster. Term color is given by cluster ID and the size of the  
1476 terms is given by  $-\log_{10}$  P-value. The stronger the similarity among terms, the thicker the edges  
1477 between them.  
1478

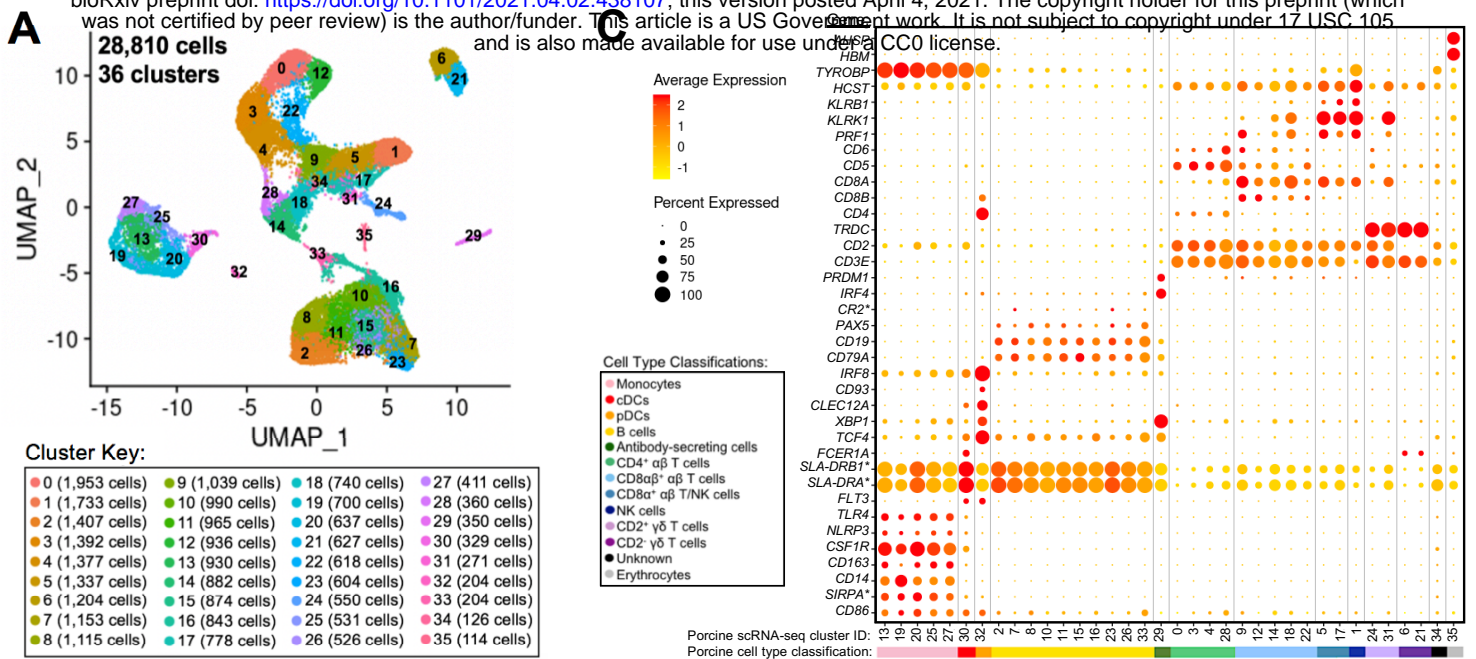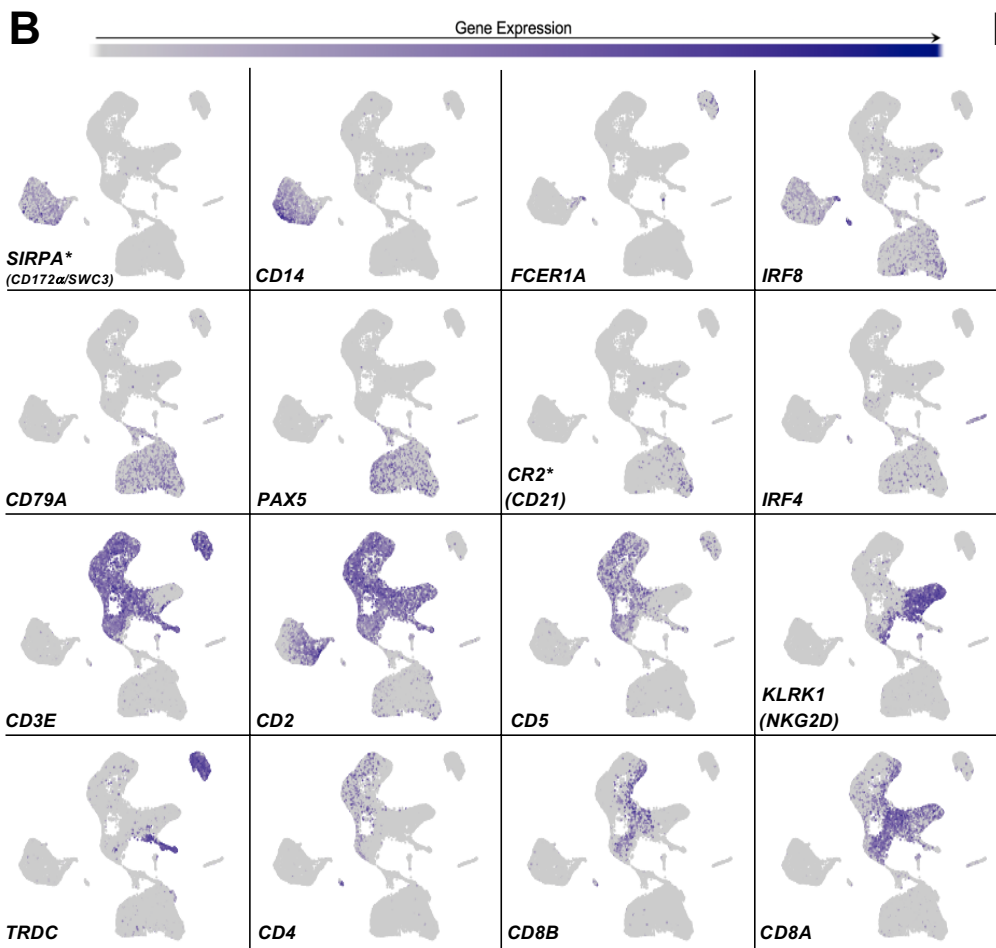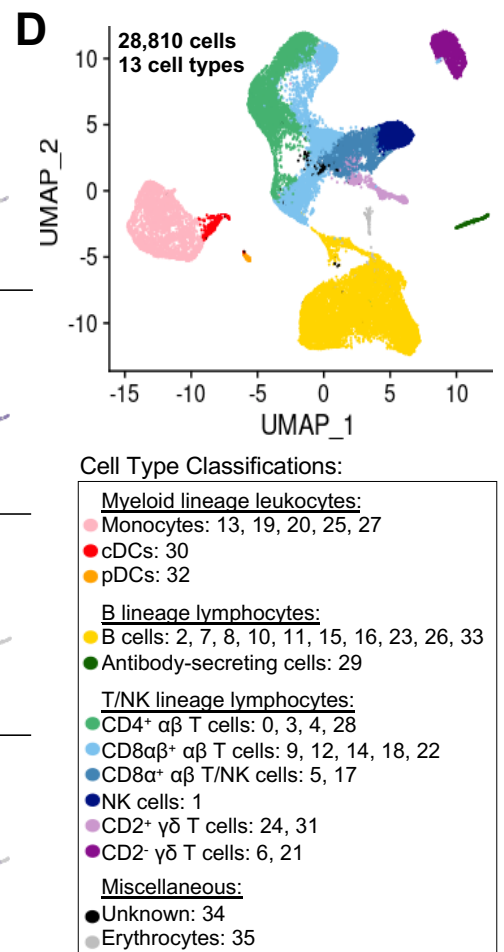

1479 **Figure 4.** Classification of porcine PBMC scRNA-seq clusters based on known cell type-specific  
1480 gene expression. **A)** Two-dimensional UMAP visualization of 28,810 single cells from porcine  
1481 PBMCs classified into 36 designated clusters. Each point represents a single cell. Color of the  
1482 point corresponds to transcriptional cluster a cell belongs to. Cells more transcriptionally similar  
1483 to each other belong to the same cluster. **B)** Visualization of selected cell type-specific gene  
1484 expression overlaid onto two-dimensional UMAP coordinates of single cells. Each point  
1485 represents a single cell. Color of the point corresponds to relative expression of a specified gene  
1486 (bottom left of each UMAP plot) within a cell. Grey corresponds to little/no gene expression,  
1487 while navy corresponds to increased gene expression. **C)** Dot Plot visualization of selected cell  
1488 type-specific gene expression for each single-cell cluster shown in A. Clusters are listed on the x-  
1489 axis, while selected genes are listed on the y-axis. The size of a dot corresponds to the percent of  
1490 cells in a cluster that expressed the gene. The color of a dot corresponds to the average relative  
1491 expression level for the gene in the cells expressing the gene within a cluster. Color bar below  
1492 the x-axis corresponds to porcine cell type each cluster was classified as. **D)** Two-dimensional  
1493 UMAP visualization of single cells from porcine PBMCs classified into major porcine cell types.  
1494 Each point represents a single cell. Color of the cell corresponds to porcine cell type the  
1495 respective cluster was designated as based on gene expression patterns for the cluster it belonged  
1496 to in C. Seven PBMC samples used for scRNA-seq analysis were derived from each of three  
1497 separate experiments (experiment B, n=2; experiment C, n = 3; experiment D, n = 2). Between  
1498 3,042 and 6,518 cells were derived from each PBMC sample. \*Refer to ‘Gene name  
1499 replacement’ methods.

1500

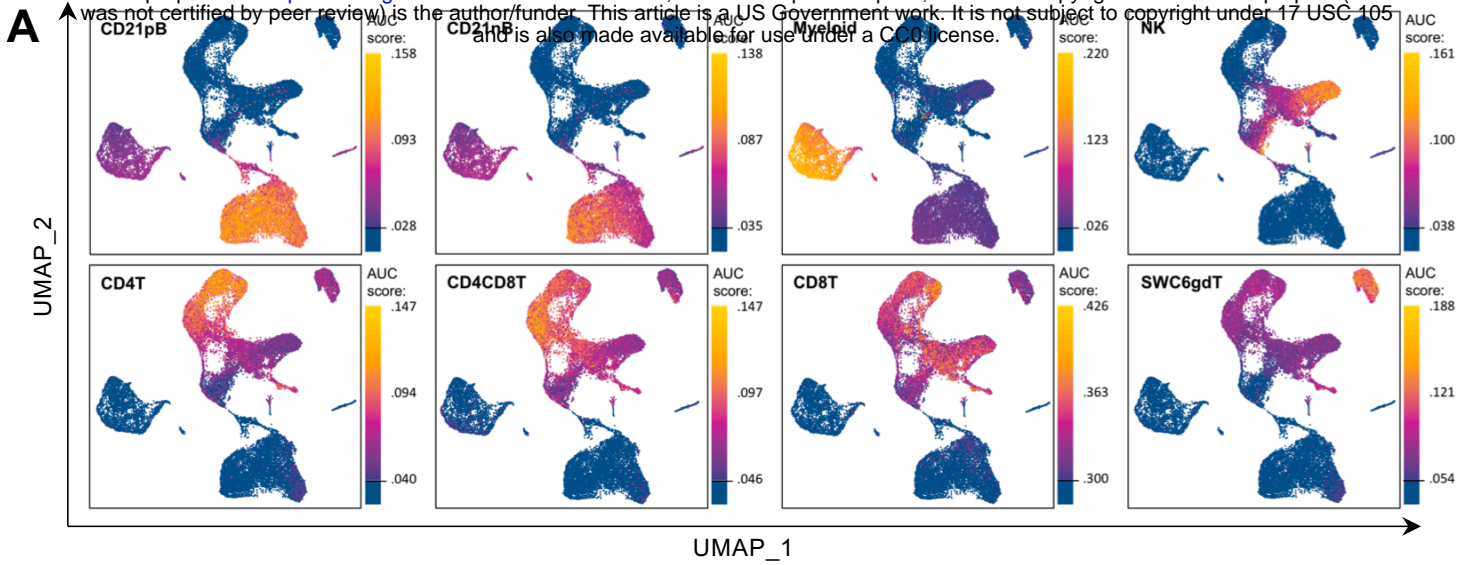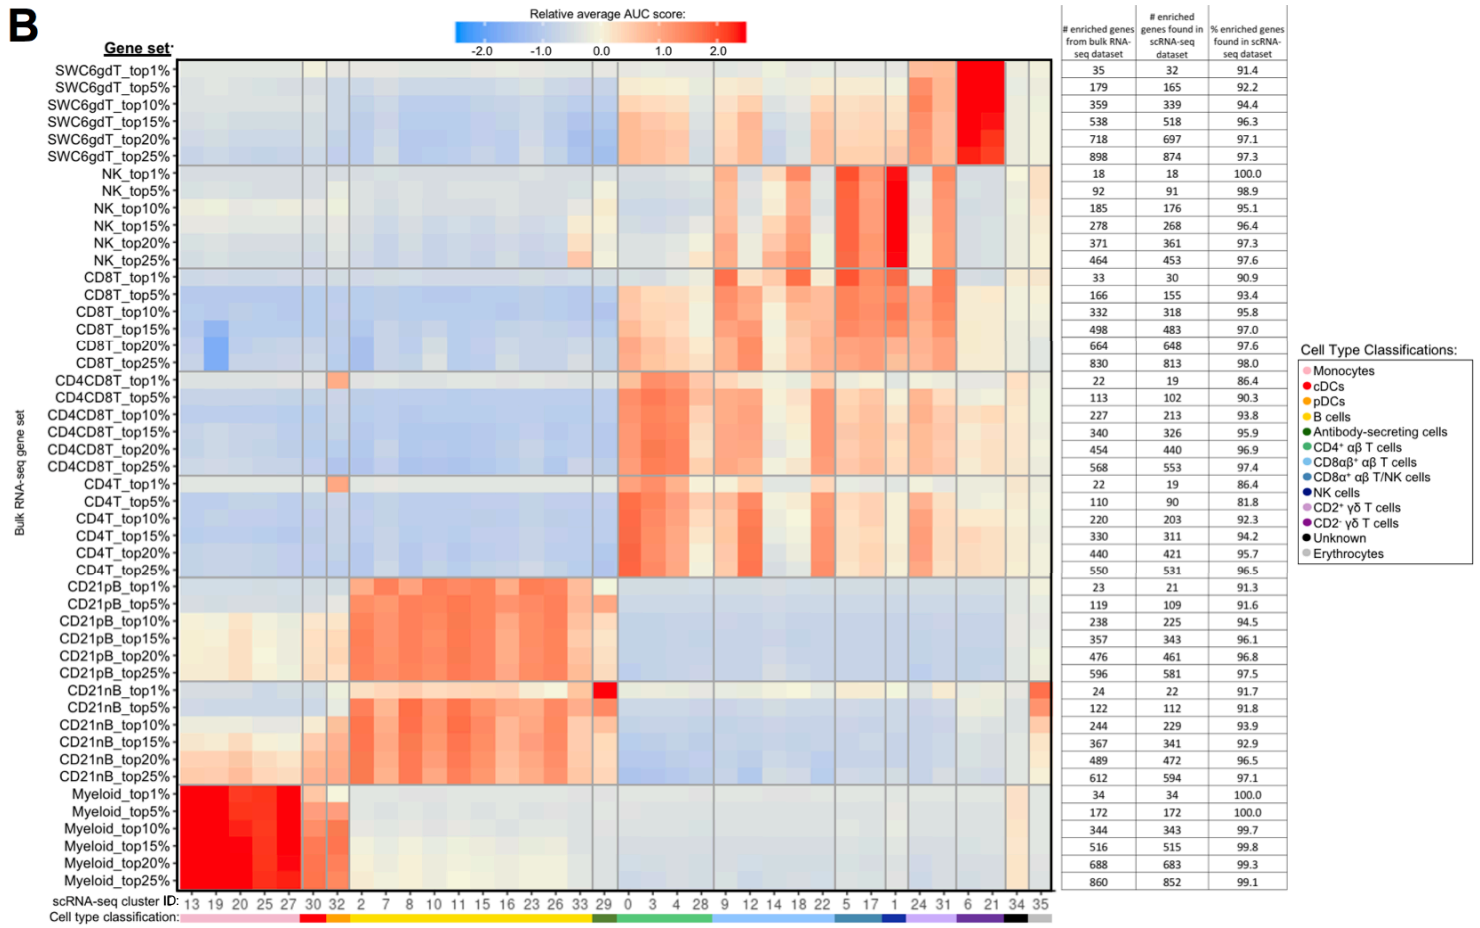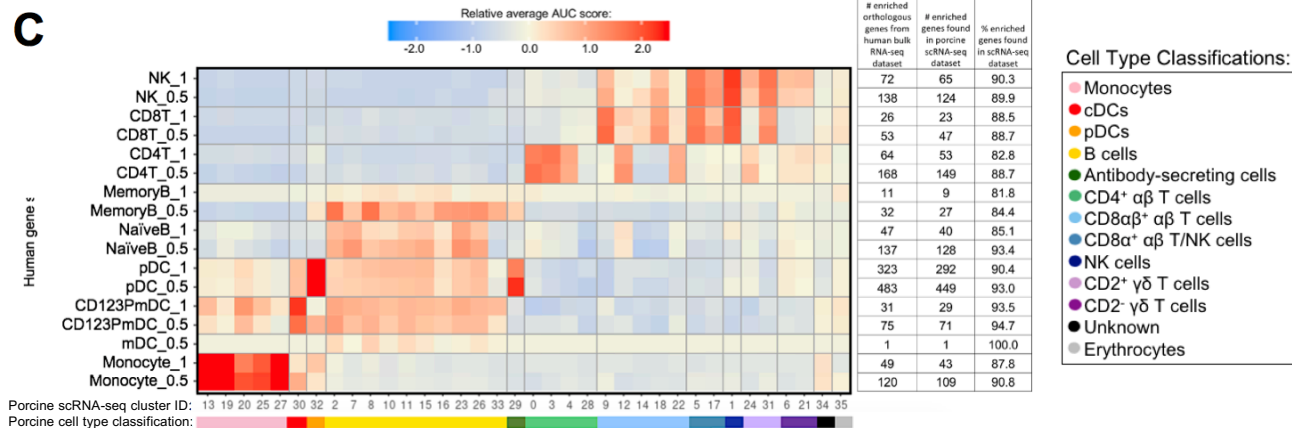

1501 **Figure 5.** Enrichment of gene signatures from bulkRNA-seq in porcine single-cell clusters. **A)**  
1502 Gene set enrichment scores calculated by AUCell analysis of enriched gene sets from the top  
1503 25% of SEGs in pig bulkRNA-seq sorted populations overlaid onto cells of the porcine scRNA-  
1504 seq dataset visualized in two-dimensional UMAP plot. Each point represents a single cell. The  
1505 color of the point corresponds to the AUC score calculated for each respective cell. Higher AUC  
1506 scores correspond to a greater percentage of cells from a gene set being detected in the top 5% of  
1507 expressed genes in a cell. A threshold for AUC score detection within each gene set was set as  
1508 shown in Supplementary Figure 10A and is indicated by a horizontal line on the gradient fill  
1509 scale for each plot. **B)** Relative average gene set enrichment scores of scRNA-seq clusters  
1510 calculated by AUCell analysis of enriched gene sets from porcine bulkRNA-seq sorted data.  
1511 Scores are relative to other cells within a single gene set comparison (across a row of the  
1512 heatmap) and are not calculated relative to scores across different gene sets (across columns in  
1513 the heatmap). Gene sets were created from the top 1, 5, 10, 15, 20, or 25% of SEGs from sorted  
1514 populations, as determined by highest log<sub>2</sub>FC values in the porcine bulkRNA-seq data. The  
1515 number of genes included from the bulkRNA-seq dataset and the number and percent of genes  
1516 detected in the scRNA-seq dataset is listed on the right of the heatmap. A color bar under  
1517 scRNA-seq cluster IDs indicates the cell type classification, as according to Figure 4D. **C)**  
1518 Relative average gene set enrichment scores of scRNA-seq clusters calculated by AUCell  
1519 analysis of enriched gene sets from human bulkRNA-seq sorted data. Scores are relative to other  
1520 cells within a single gene set comparison (across a row of the heatmap) and are not calculated  
1521 relative to scores across different gene sets (across columns in the heatmap). Gene sets were  
1522 created from genes with high expression scores > 0.5 or >1 for each respective sorted population  
1523 of cells, with a greater high expression score indicating greater enrichment. The number of genes

1524 included from the bulkRNA-seq dataset and the number and percent of genes detected in the  
1525 scRNA-seq dataset is listed on the right of the heatmap. A color bar under scRNA-seq cluster  
1526 IDs indicates the cell type classification, as according to Figure 4D.  
1527

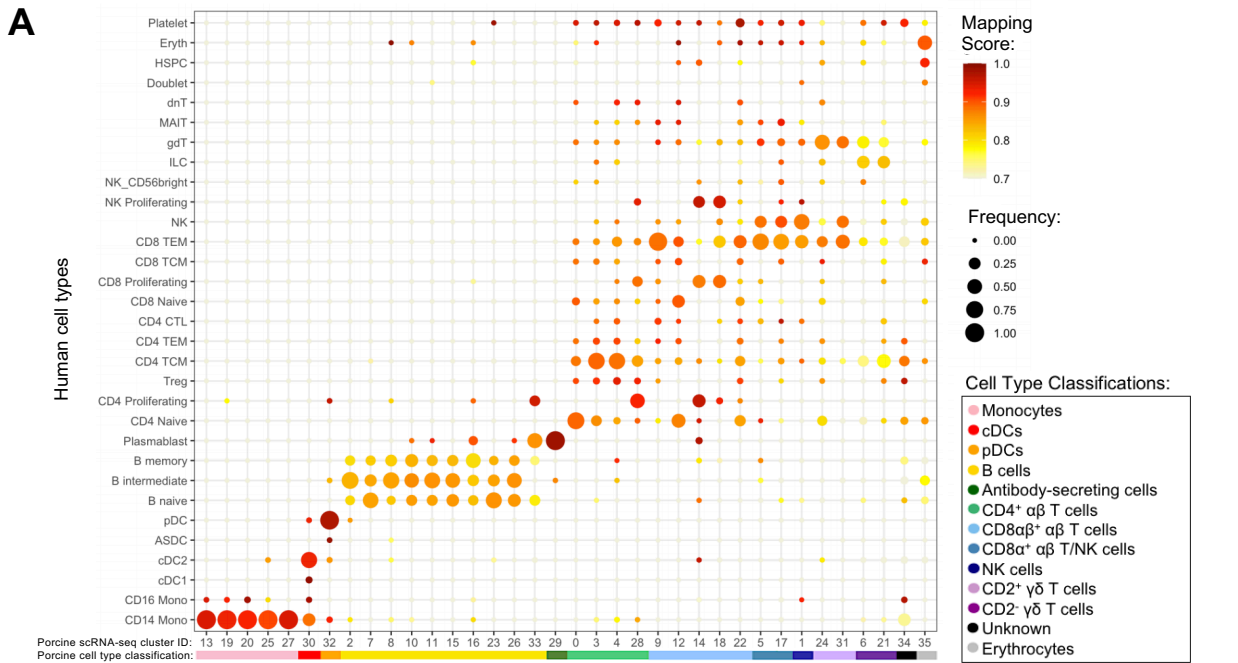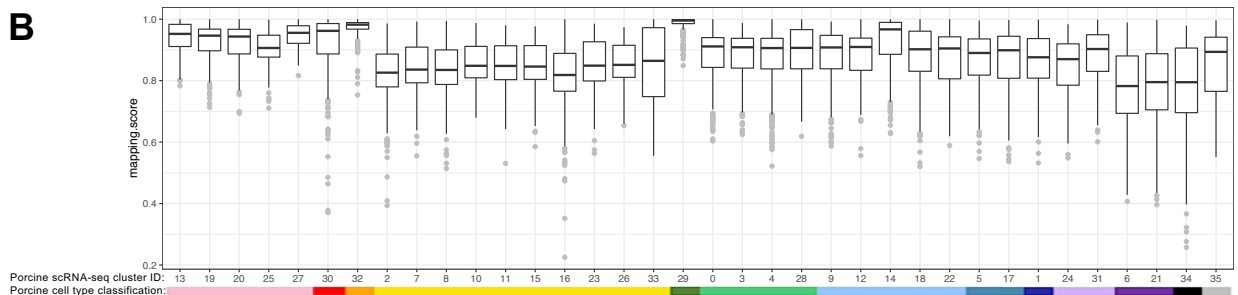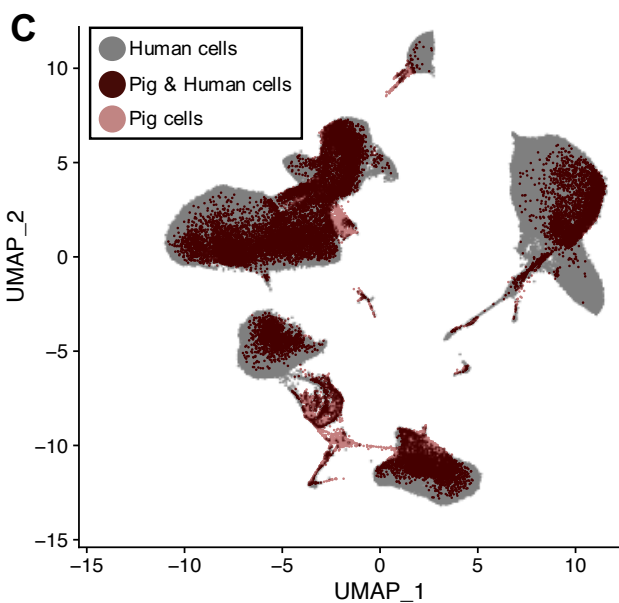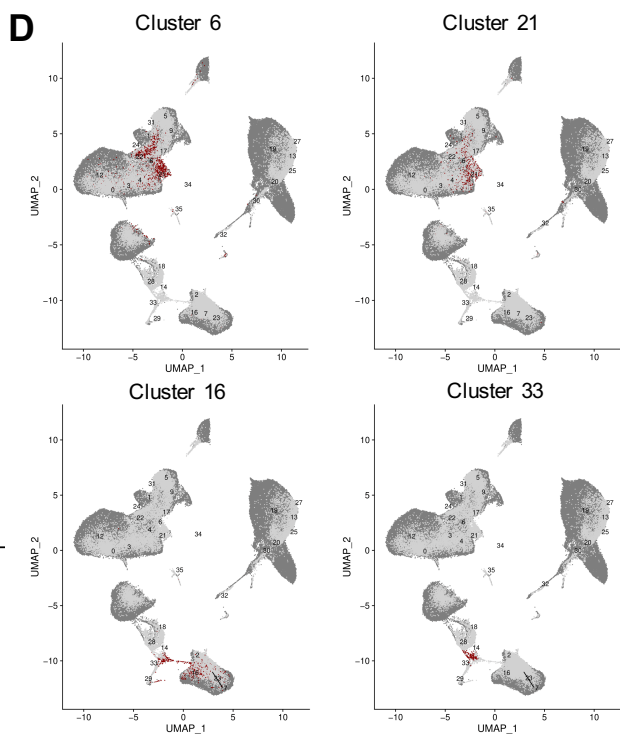



1528 **Figure 6.** Integration of porcine and human scRNA-seq datasets to further annotate porcine  
1529 cells. **A)** Mapping scores calculated to determine how well porcine cells were represented by the  
1530 human dataset. The human cell type specific frequency (size of the circle) and mapping score for  
1531 that human cell type (color) are shown for each porcine scRNA-seq cluster. Porcine cell type  
1532 classifications (color) are shown below the porcine scRNA-seq cluster IDs. **B)** Mapping scores  
1533 calculated to determine how well porcine cells were represented by the human dataset. The  
1534 mapping scores for each porcine scRNA-seq cluster is represented by a box and whiskers plot.  
1535 Porcine cell type classifications (color) are shown below the porcine scRNA-seq cluster IDs. **C)**  
1536 To identify cells in the porcine dataset that were not well represented in the human dataset, a de-  
1537 novo visualization of the merged porcine and human data was performed. The porcine (pink) and  
1538 human (grey) were plotted together using UMAP. An overlap of both porcine and human cells is  
1539 shown as (dark red). Clusters of porcine cells that are not well represented in the human data can  
1540 be observed by pink regions in the plot. **D)** Two primary regions of porcine cells that were not  
1541 well represented in the human data were identified in C. In order to clarify which porcine  
1542 scRNA-seq clusters were represented in these regions, the porcine cluster IDs were projected  
1543 onto the UMAP and cells from four clusters overlapping the identified regions were colored as  
1544 dark red.

1545

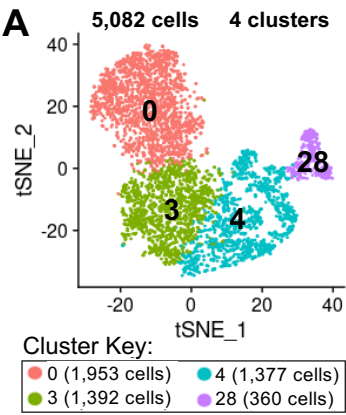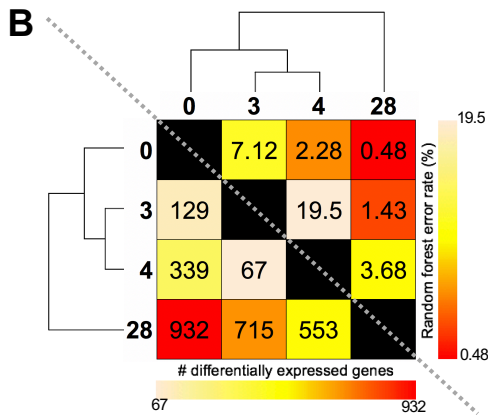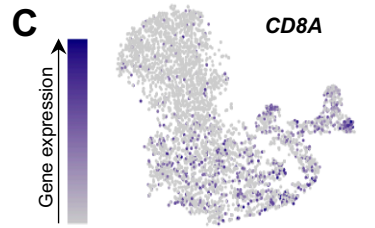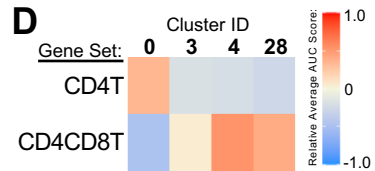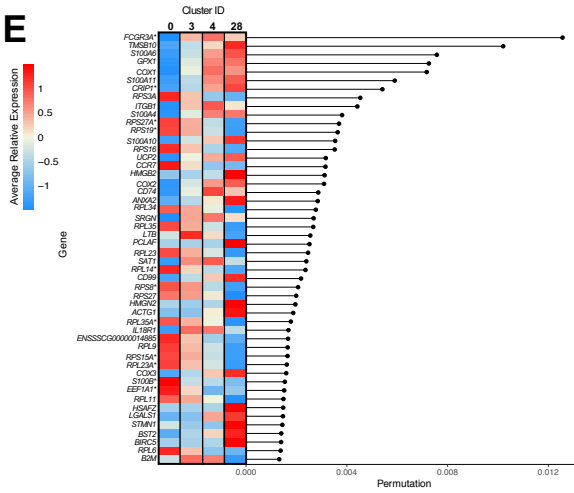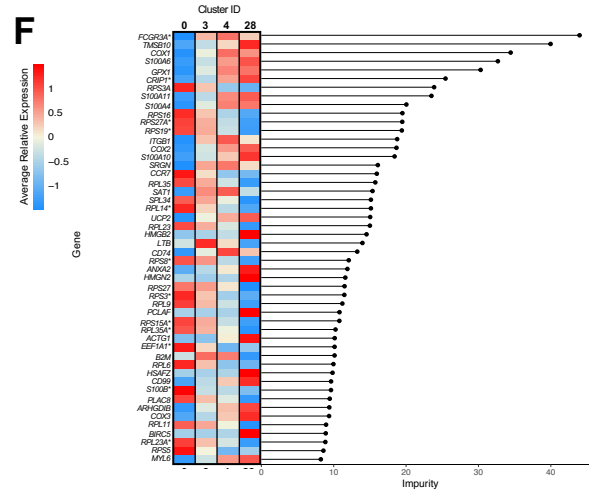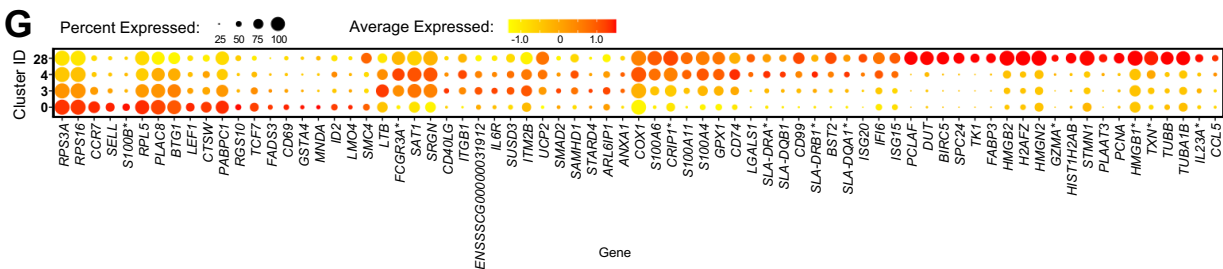

1546 **Figure 7.** Transcriptional heterogeneity of porcine CD4<sup>+</sup> ab T-cells at single-cell resolution. **A)**  
1547 Two-dimensional t-SNE plot of 5,082 cells belonging to clusters designated as CD4<sup>+</sup> ab T-cells  
1548 (clusters 0, 3, 4, 28) in Figure 4D. Each point represents a single cell. Color of the cell  
1549 corresponds to transcriptional cluster a cell belongs to. Cells more transcriptionally similar to  
1550 each other belong to the same cluster. **B)** Transcriptomic relationship amongst CD4<sup>+</sup> ab T-cell  
1551 clusters as calculated by three methods: hierarchical clustering (as seen by hierarchical trees on  
1552 both axes), pairwise random forest analyses (as seen on top right diagonal); and pairwise DGE  
1553 analyses (as seen on bottom left diagonal). Longer branches on the hierarchical tree corresponds  
1554 to greater hierarchical distance. Lower numbers of DEGs by DGE analysis and higher out-of-bag  
1555 (OOB) error rates from random forest analyses indicate greater pairwise transcriptional  
1556 similarity. **C)** Visualization of CD8A expression overlaid onto t-SNE coordinates of single  
1557 CD4<sup>+</sup> ab T-cells. Each point represents a single cell. Color of the point corresponds to relative  
1558 expression of CD8A within a cell. Grey corresponds to little/no gene expression, while navy  
1559 corresponds to increased gene expression. **D)** Relative average gene set enrichment scores of  
1560 CD4<sup>+</sup> ab T-cell clusters calculated by AUCell analysis of DEG sets from pairwise DGE analysis  
1561 of the CD4T and CD4CD8T populations from porcine bulkRNA-seq. Scores are relative to other  
1562 cells within a single gene set comparison (across a row of the heatmap) and are not calculated  
1563 relative to scores across gene set (across columns in the heatmap). **E&F)** Genes with the largest  
1564 effects in discriminating CD4<sup>+</sup> ab T-cells by cluster identities were determined, as indicated by  
1565 high permutation (**E**) and/or impurity scores (**F**) calculated from a trained random forest model.  
1566 Average relative expression for each of these genes within clusters is also depicted by a heatmap.  
1567 **G)** Dot plot of up to the top 20 DEGs having logFC > 0 from overall DGE analysis of only  
1568 CD4<sup>+</sup> ab T-cell clusters. Clusters are listed on the y-axis, while selected DEGs are listed on the

1569 x-axis. The size of a dot corresponds to the percent of cells in a cluster that expressed the gene.

1570 The color of a dot corresponds to the average relative expression level for the gene in the cells

1571 expressing the gene within a cluster. \*Refer to 'Gene name replacement' methods.

1572

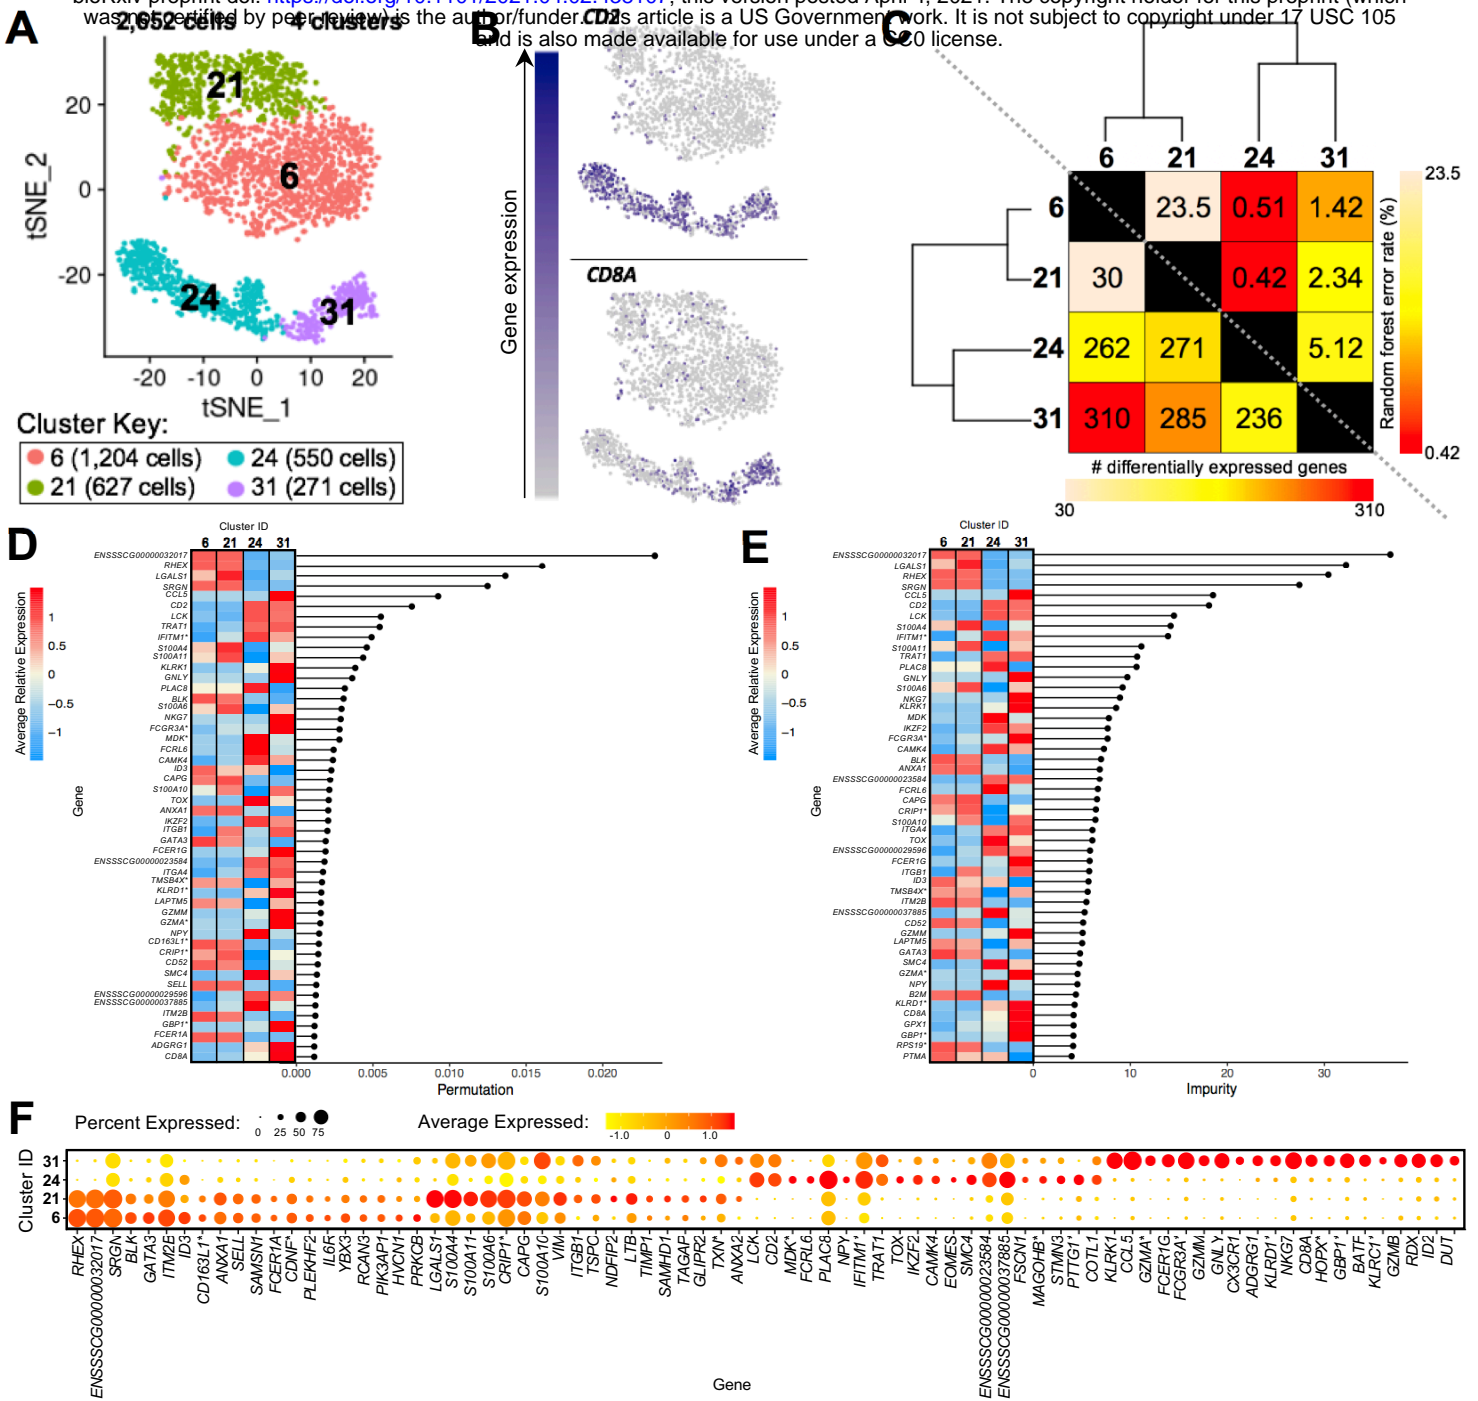

1573 **Figure 8.** Transcriptional heterogeneity of porcine gd T-cells at single-cell resolution. **A)** Two-  
1574 dimensional t-SNE plot of 2,652 cells belonging to clusters designated as CD2- gd T-cells  
1575 (clusters 6, 21) or CD2+ gd T-cells (clusters 24, 31) in Figure 4D. Each point represents a single  
1576 cell. Color of the cell corresponds to transcriptional cluster a cell belongs to. Cells more  
1577 transcriptionally similar to each other belong to the same cluster. **B)** Visualization of selected  
1578 gene expression overlaid onto t-SNE coordinates of single gd T-cells. Each point represents a  
1579 single cell. Color of the point corresponds to relative expression of a specified gene (top left of  
1580 each t-SNE plot) within a cell. Grey corresponds to little/no gene expression, while navy  
1581 corresponds to increased gene expression. **C)** Transcriptomic relationship amongst gd T-cell  
1582 clusters as calculated by three methods: hierarchical clustering (as seen by hierarchical trees on  
1583 both axes), pairwise random forest analyses (as seen on top right diagonal); and pairwise DGE  
1584 analyses (as seen on bottom left diagonal). Longer branches on the hierarchical tree corresponds  
1585 to greater hierarchical distance. Lower numbers of DEGs by DGE analysis and higher out-of-bag  
1586 (OOB) error rates from random forest analyses indicate greater pairwise transcriptional  
1587 similarity. **D&E)** Genes with the largest effects in discriminating gd T-cells by cluster identities  
1588 were determined, as indicated by high permutation (**D**) and/or impurity scores (**E**) calculated  
1589 from a trained random forest model. Average relative expression for each of these genes within  
1590 clusters is also depicted by a heatmap. **F)** Dot plot of up to the top 20 DEGs having  $\log_{2}FC > 0$   
1591 from overall DGE analysis of only gd T-cell clusters. Clusters are listed on the y-axis, while  
1592 selected DEGs are listed on the x-axis. The size of a dot corresponds to the percent of cells in a  
1593 cluster that expressed the gene. The color of a dot corresponds to the average relative expression  
1594 level for the gene in the cells expressing the gene within a cluster. \*Refer to ‘Gene name  
1595 replacement’ methods.
