# Supplementary material for: Reference transcriptomes of porcine peripheral immune cells created through bulk and single-cell RNA sequencing
Source: bioRxiv preprint, doi:10.1101/2021.04.02.438107, version 1 (2021-04-04)
Supplement: SuppFile01 [file 438107_file13.xlsx]

## Sheet: Trimmomatic summary
Supplementary File 1. Summary of the sequencing metrics of the bulk RNA-seq.
Sample	Input_Read_Pairs	Both_Surviving	Forward_Only_Surviving	Reverse_Only_Surviving	Dropped
A1_SWC6gdT	45466391	41067947	3296345	509193	592906
A1_CD8T	55295036	48274122	5345619	752997	922298
A1_Myeloid	38044103	34478885	2506461	494128	564629
A1_CD4CD8T	38433454	32948915	4581633	442242	460664
A1_CD4T	50951259	44424438	5241204	582362	703255
A1_NK	43364038	38201211	4015796	500997	646034
A1_CD21pB	41340099	36349170	3673824	499034	818071
A1_CD21nB	41101628	37036419	3184214	423968	457027
A2_SWC6gdT	51896502	45325195	5241843	544601	784863
A2_CD8T	59022127	50701091	6661931	726708	932397
A2_CD4CD8T	44416277	38770272	3549483	686712	1409810
A2_CD4T	42009371	30159184	9942377	879638	1028172
A2_Myeloid	59763884	52144683	6023887	678301	917013
A2_CD21pB	48042624	41420520	5371075	625922	625107
A2_CD21nB	44909810	38778946	4130592	623120	1377152

## Sheet: FASTQC
Supplementary File 1. Summary of the sequencing metrics of the bulk RNA-seq.
FileName	Adapter Content	Basic Statistics	Per base N content	Per base sequence quality	Per sequence GC content	Per sequence quality scores	Per tile sequence quality	Sequence Length Distribution	Sequence length	Sequences flagged as poor quality	Total Sequences
A1_SWC6gdT_S1_L001_R1_001.fastq.gz	pass	pass	pass	pass	pass	pass	pass	warn	35-76	0	45466391
A1_SWC6gdT_S1_L001_R2_001.fastq.gz	pass	pass	pass	pass	warn	pass	pass	warn	35-76	0	45466391
A1_CD8T_S2_L001_R1_001.fastq.gz	pass	pass	pass	pass	warn	pass	pass	warn	35-76	0	55295036
A1_CD8T_S2_L001_R2_001.fastq.gz	pass	pass	pass	pass	warn	pass	pass	warn	35-76	0	55295036
A1_Myeloid_S3_L001_R1_001.fastq.gz	pass	pass	pass	pass	pass	pass	pass	warn	35-76	0	38044103
A1_Myeloid_S3_L001_R2_001.fastq.gz	pass	pass	pass	pass	pass	pass	pass	warn	35-76	0	38044103
A1_CD4CD8T_S6_L001_R1_001.fastq.gz	pass	pass	pass	pass	pass	pass	pass	warn	35-76	0	38433454
A1_CD4CD8T_S6_L001_R2_001.fastq.gz	pass	pass	pass	pass	pass	pass	pass	warn	35-76	0	38433454
A1_CD4T_S7_L001_R1_001.fastq.gz	pass	pass	pass	pass	warn	pass	pass	warn	35-76	0	50951259
A1_CD4T_S7_L001_R2_001.fastq.gz	pass	pass	pass	pass	warn	pass	pass	warn	35-76	0	50951259
A1_NK_S8_L001_R1_001.fastq.gz	pass	pass	pass	pass	warn	pass	pass	warn	35-76	0	43364038
A1_NK_S8_L001_R2_001.fastq.gz	pass	pass	pass	pass	warn	pass	pass	warn	35-76	0	43364038
A1_CD21pB_S9_L001_R1_001.fastq.gz	pass	pass	pass	pass	warn	pass	pass	warn	35-76	0	41340099
A1_CD21pB_S9_L001_R2_001.fastq.gz	pass	pass	pass	pass	warn	pass	pass	warn	35-76	0	41340099
A1_CD21nB_S10_L001_R1_001.fastq.gz	pass	pass	pass	pass	warn	pass	pass	warn	35-76	0	41101628
A1_CD21nB_S10_L001_R2_001.fastq.gz	pass	pass	pass	pass	warn	pass	pass	warn	35-76	0	41101628
A2_SWC6gdT_S11_L001_R1_001.fastq.gz	pass	pass	pass	pass	pass	pass	pass	warn	35-76	0	51896502
A2_SWC6gdT_S11_L001_R2_001.fastq.gz	pass	pass	pass	pass	pass	pass	pass	warn	35-76	0	51896502
A2_CD8T_S12_L001_R1_001.fastq.gz	pass	pass	pass	pass	warn	pass	pass	warn	35-76	0	59022127
A2_CD8T_S12_L001_R2_001.fastq.gz	pass	pass	pass	pass	warn	pass	pass	warn	35-76	0	59022127
A2_CD4CD8T_S13_L001_R1_001.fastq.gz	pass	pass	pass	pass	fail	pass	pass	warn	35-76	0	44416277
A2_CD4CD8T_S13_L001_R2_001.fastq.gz	pass	pass	pass	pass	warn	pass	pass	warn	35-76	0	44416277
_S14_L001_R1_001.fastq.gz	pass	pass	pass	pass	fail	pass	pass	warn	35-76	0	42009371
A2_CD4T_S14_L001_R2_001.fastq.gz	pass	pass	pass	pass	warn	pass	pass	warn	35-76	0	42009371
A2_Myeloid_S15_L001_R1_001.fastq.gz	pass	pass	pass	pass	pass	pass	pass	warn	35-76	0	59763884
A2_Myeloid_S15_L001_R2_001.fastq.gz	pass	pass	pass	pass	warn	pass	pass	warn	35-76	0	59763884
A2_CD21pB_S4_L001_R1_001.fastq.gz	pass	pass	pass	pass	pass	pass	pass	warn	35-76	0	48042624
A2_CD21pB_S4_L001_R2_001.fastq.gz	pass	pass	pass	pass	warn	pass	pass	warn	35-76	0	48042624
A2_CD21nB_S16_L001_R1_001.fastq.gz	pass	pass	pass	pass	warn	pass	pass	warn	35-76	0	44909810
A2_CD21nB_S16_L001_R2_001.fastq.gz	pass	pass	pass	pass	pass	pass	pass	warn	35-76	0	44909810

## Sheet: Mapping stats
Supplementary File 1. Summary of the sequencing metrics of the bulk RNA-seq.
Unique reads
Number of input reads	40819338
Average input read length	148
Uniquely mapped reads number	38545491
Uniquely mapped reads %	0.9443
Average mapped length	147.69
Number of splices: Total	20711880
Number of splices: Annotated	20128853
Number of splices: GT/AG	20589097
Number of splices: GC/AG	108857
Number of splices: AT/AC	13926
Mismatch rate per base, %	0.0028
Deletion rate per base	0.0001
Deletion average length	1.76
Insertion rate per base	0.0001
Insertion average length	1.31
MultiI-mapping reads
Number of reads mapped to multiple loci	2015207
% of reads mapped to multiple loci	0.0494
Number of reads mapped to too many loci	26118
% of reads mapped to too many loci	0.0006
Unnmapped reads
% of reads unmapped: too many mismatches	0
% of reads unmapped: too short	0.0054
% of reads unmapped: other	0.0003

## Sheet: Count stats
Supplementary File 1. Summary of the sequencing metrics of the bulk RNA-seq.
Pair-end
Status	A1_SWC6gdT	A1_CD8T	A1_Myeloid	A1_CD4CD8T	A1_CD4T	A1_NK	A1_CD21pB	A1_CD21nB	A2_SWC6gdT	A2_CD8T	A2_CD4CD8T	A2_CD4T	A2_Myeloid	A2_CD21pB	A2_CD21nB
Assigned	2392940	3315731	1926306	1875218	2759966	2129543	2236918	2133690	2176451	4087718	2243784	1720382	3309156	2926486	3038051
Unassigned_MultiMapping	5608904	7610762	4258431	2886725	4967251	4661749	5033133	4909525	14284648	9555006	6848315	6160390	15436732	10213251	13320471
Unassigned_NoFeatures	36140304	41185926	30598618	29113436	38813990	33671046	31727605	32791650	37327276	41867370	33176799	23827147	42287720	34063275	30633425
Unassigned_Ambiguity	12247	15978	10371	8773	14243	12297	18698	13989	19224	15643	18091	11760	36583	11482	14659
Single-end
Status	A1_SWC6gdT	A1_CD8T	A1_Myeloid	A1_CD4CD8T	A1_CD4T	A1_NK	A1_CD21pB	A1_CD21nB	A2_SWC6gdT	A2_CD8T	A2_CD4CD8T	A2_CD4T	A2_Myeloid	A2_CD21pB	A2_CD21nB
Assigned	185809	370197	130197	268220	336598	233830	236651	181204	247092	522682	210602	634305	415804	380382	313294
Unassigned_MultiMapping	734907	1312257	519188	741989	1044220	808166	823189	651978	2213935	1997170	992573	3269336	2495473	1938823	1834417
Unassigned_NoFeatures	2973805	4821237	2264771	4523810	5031073	3865283	3448363	3049062	4566747	5983979	3156710	9323967	5274896	4738831	3505746
Unassigned_Ambiguity	1267	2351	903	1513	2286	1679	2554	1491	2648	2416	2395	5427	5761	1780	1848
Total
Status	A1_SWC6gdT	A1_CD8T	A1_Myeloid	A1_CD4CD8T	A1_CD4T	A1_NK	A1_CD21pB	A1_CD21nB	A2_SWC6gdT	A2_CD8T	A2_CD4CD8T	A2_CD4T	A2_Myeloid	A2_CD21pB	A2_CD21nB
Assigned	2578749	3685928	2056503	2143438	3096564	2363373	2473569	2314894	2423543	4610400	2454386	2354687	3724960	3306868	3351345
Unassigned_MultiMapping	6343811	8923019	4777619	3628714	6011471	5469915	5856322	5561503	16498583	11552176	7840888	9429726	17932205	12152074	15154888
Unassigned_NoFeatures	39114109	46007163	32863389	33637246	43845063	37536329	35175968	35840712	41894023	47851349	36333509	33151114	47562616	38802106	34139171
Unassigned_Ambiguity	13514	18329	11274	10286	16529	13976	21252	15480	21872	18059	20486	17187	42344	13262	16507

## Sheet: TPM_YARN_annotatedIDs
Supplementary File 1. TPM values of porcine sorted immune cells
Porcine_ID	Porcine_Gene_name	A1_CD21nB	A2_CD21nB	A1_CD21pB	A2_CD21pB	A1_CD4T	A2_CD4T	A1_CD8T	A2_CD8T	A1_CD4CD8T	A2_CD4CD8T	A1_SWC6gdT	A2_SWC6gdT	A1_Myeloid	A2_Myeloid	A1_NK
ENSSSCG00000000660	A2M	0.0245591	0.0117741	0.0176497	0.0835386	0.174894	0.280876	0.0271357	0.0448643	0.0632532	0.145213	0.0317203	0.0346023	86.1388	59.1946	0.00612839
ENSSSCG00000026962	A4GALT	10.7753	14.8919	12.3529	12.3848	9.40772	7.64539	7.92195	8.66509	13.8491	10.6517	10.0093	10.3354	20.0607	16.257	3.43592
ENSSSCG00000000268	AAAS	6.88389	8.25493	4.94998	6.313	5.89287	4.79927	6.57557	6.89242	6.138	3.70968	6.02787	4.87579	1.85165	1.27224	8.21207
ENSSSCG00000009755	AACS	7.70578	10.2385	9.69734	9.84113	8.23219	7.53834	7.68486	9.73896	7.54547	5.90007	10.8462	5.9394	4.8596	2.53887	6.84675
ENSSSCG00000004951	AAGAB	13.9139	12.8563	11.3684	16.5143	9.81048	13.7573	10.7404	12.4651	10.1013	12.2362	10.8343	11.9374	35.1593	41.5837	11.1551
ENSSSCG00000008337	AAK1	1.15536	2.04426	1.72758	2.11536	2.8764	4.2271	2.97198	2.62793	4.42638	5.73148	3.04171	4.14597	3.42681	3.76241	3.72968
ENSSSCG00000016189	AAMP	46.2364	60.0389	37.1279	50.448	24.8762	22.8686	28.8095	29.7375	27.0168	24.3546	29.8058	22.9112	73.369	75.0222	31.865
ENSSSCG00000007315	AAR2	7.36384	19.5416	7.5428	13.2044	11.2046	9.73284	11.8458	13.8183	12.8613	8.80698	11.5141	9.7599	9.17317	7.02191	11.5754
ENSSSCG00000002723	AARS1	22.2506	22.9018	17.16	21.0787	21.133	16.1997	18.0631	12.3243	34.8889	20.4255	29.7335	22.9376	27.5926	20.0648	27.434
ENSSSCG00000001706	AARS2	7.6714	5.10783	8.25228	6.07503	9.97083	11.0351	8.17438	7.00996	8.66656	8.96106	7.24837	7.9242	5.4651	6.17207	7.84057
ENSSSCG00000027403	AASDH	13.3757	7.47707	14.9151	12.4586	11.3041	12.944	8.32631	7.92407	11.1804	11.8044	10.4954	13.2599	8.89389	10.5239	10.9281
ENSSSCG00000014998	AASDHPPT	5.78105	4.81534	4.60612	8.67366	6.97882	5.88933	5.17602	6.156	8.19383	6.31681	7.25189	6.30959	7.03343	4.21454	9.93933
ENSSSCG00000016613	AASS	0.115452	0.0890889	0.383241	0.116892	0.917657	0.360934	0.399738	0.217638	0.49537	0.564119	1.28855	0.584638	0.21095	0.270601	0.161291
ENSSSCG00000017693	AATF	16.0773	14.4411	17.9309	18.557	19.351	15.3453	23.565	17.0321	20.9067	18.2454	20.7609	14.5685	14.2444	12.7166	19.5602
ENSSSCG00000007909	ABAT	0.0505157	0.0117741	0.00331914	0.0882653	0.0286069	0.0119	0.50669	0.827107	0.00170735	0.0906011	0.0011845	0.0758268	0.00154798	0.0298086	14.374
ENSSSCG00000005423	ABCA1	0.266272	0.38128	0.403487	0.293488	0.721854	0.750442	0.343344	0.31817	0.342585	0.404164	0.662557	1.19923	1.49152	2.4917	2.14151
ENSSSCG00000008051	ABCA3	14.8876	6.23526	19.629	10.1033	1.8066	1.66104	1.28153	1.38047	2.54199	2.60258	2.43457	2.47197	3.62395	4.54329	2.08844
ENSSSCG00000017255	ABCA5	5.35116	3.79002	7.0285	7.018	2.4199	4.0666	1.57479	1.5923	2.18145	3.13189	3.02464	4.5023	1.06709	0.992172	1.21581
ENSSSCG00000017256	ABCA6	0.00294662	0.0117741	0.028837	0.00916371	0.0469787	0.00553848	0.00132549	0.00422539	0.0214083	0.00247515	0.0011845	0.00498369	8.05545	1.76151	0.00079626
ENSSSCG00000023121	ABCA7	6.822	2.00842	10.7023	2.34877	10.1626	15.1768	6.01247	2.72776	7.74635	9.40693	7.73486	15.1837	2.83201	5.28503	1.33833
ENSSSCG00000026473	ABCA8	0.00302118	0.0117741	0.00331914	0.00916371	0.00387933	0.00100702	0.00132549	0.00422539	0.00170735	0.00247515	0.0011845	0.00498369	0.39298	2.17218	0.00079626
ENSSSCG00000017257	ABCA9	0.0245389	0.0117741	0.0228398	0.040428	0.0194858	0.0210246	0.00132549	0.0217065	0.00170735	0.11921	0.012482	0.00498369	9.21864	25.0875	0.00853215
ENSSSCG00000010188	ABCB10	15.9946	13.4514	13.7935	18.3311	8.37691	10.1852	7.2975	8.82787	7.13937	9.23084	15.9592	19.7094	35.5721	30.14	18.5772
ENSSSCG00000016210	ABCB6	0.89359	1.54786	1.09966	1.47531	1.81353	2.91705	1.96223	3.04328	1.03369	1.65132	1.34685	2.39925	4.61304	7.05916	1.15083
ENSSSCG00000012424	ABCB7	28.882	33.8454	24.6083	40.7494	27.7	20.2898	27.7631	28.8628	37.8185	28.6062	23.2399	18.9816	48.563	38.2767	31.0407
ENSSSCG00000027986	ABCB8	11.5163	9.5444	10.9011	9.10064	15.5388	14.4653	13.4306	9.63438	15.1313	13.8682	12.7566	14.1852	5.55383	6.12826	10.5913
ENSSSCG00000009784	ABCB9	13.6481	11.4692	4.16253	4.38933	0.0897889	0.161287	0.193913	0.590709	0.132395	0.133344	0.819119	1.26778	0.874881	0.859635	0.572846
ENSSSCG00000007874	ABCC1	25.9263	18.2196	29.2002	13.2735	19.6092	13.6548	18.0275	12.2204	28.0396	15.7046	36.861	26.5021	10.3163	11.5497	21.033
ENSSSCG00000001680	ABCC10	25.6951	8.55586	36.9252	10.541	15.1614	22.2423	14.4216	10.7674	15.7342	22.0455	16.7429	26.112	5.87517	10.9532	13.1999
ENSSSCG00000017561	ABCC3	0.618192	0.221925	0.174923	0.0437381	0.185172	0.0430529	0.0427813	0.00422539	0.178091	0.0183058	0.0768278	0.0359405	3.98367	3.00199	0.0425158
ENSSSCG00000011782	ABCC5	6.1699	1.85618	1.01229	0.993025	22.3047	22.2099	7.95981	7.53547	15.5316	21.1881	2.11516	2.07045	16.8205	18.982	3.06228
ENSSSCG00000012779	ABCD1	5.05883	7.88712	3.36854	4.46246	5.85285	4.50581	6.61794	6.59489	6.5462	4.58968	7.99179	5.99692	17.9869	17.0352	6.39138
ENSSSCG00000028620	ABCD3	10.0943	10.3574	9.19277	10.2014	11.3509	9.63211	11.5456	8.59185	14.5253	10.1421	12.5553	9.16292	12.08	10.9597	16.4979
ENSSSCG00000038231	ABCD4	5.43643	10.8738	5.97343	6.62832	5.73754	8.25773	6.77903	9.28955	6.60311	9.28686	10.6193	13.3798	17.8711	21.2774	3.65154
ENSSSCG00000009043	ABCE1	41.0537	30.5277	37.3829	46.5331	38.7157	39.3847	26.7138	37.3799	41.8619	36.5553	38.3492	39.5153	27.0359	20.459	41.9414
ENSSSCG00000001346	ABCF1	27.244	22.0817	24.7461	19.5252	27.4261	19.0338	30.419	19.5369	39.7441	26.2185	40.038	24.9971	26.0286	21.9667	32.5947
ENSSSCG00000028856	ABCF3	11.7705	13.0255	11.2192	12.0342	16.6011	13.6498	15.108	14.1299	13.6615	12.0394	16.6359	12.3026	12.8251	13.3244	12.7423
ENSSSCG00000027745	ABCG1	2.90438	1.39344	5.82093	2.44355	5.53275	5.34946	5.93688	4.37512	3.75573	2.90319	2.86266	2.13957	6.75082	5.19433	4.1501
ENSSSCG00000009215	ABCG2	0.727434	11.104	0.50534	11.6801	0.346042	9.79187	0.328813	7.30221	0.157352	5.83363	0.68592	12.3679	1.16227	11.058	0.54926
ENSSSCG00000015113	ABCG4	8.35347	13.1163	6.72931	7.01551	10.2294	10.1771	8.36243	9.39211	14.0775	10.9198	23.6856	17.3896	20.8795	18.0676	4.70035
ENSSSCG00000008554	ABHD1	0.314245	0.444732	0.685399	0.465563	1.05941	1.15747	0.674955	1.01785	0.776789	0.842806	0.981782	1.16441	0.0720122	0.243736	0.40616
ENSSSCG00000034450	ABHD10	12.7721	25.1252	12.9974	21.1844	12.1178	13.6272	13.3747	17.1096	12.7971	13.4874	14.6261	13.6725	22.1751	14.4581	14.3962
ENSSSCG00000007715	ABHD11	20.345	26.1672	16.2419	32.1988	7.16224	6.92963	8.03551	10.26	10.3341	10.649	4.40321	3.16417	10.3279	8.96037	9.82776
ENSSSCG00000040449	ABHD12	6.20279	7.44808	4.90405	7.13	6.51206	7.50716	7.24351	6.75301	6.47867	10.0521	4.57712	3.52261	117.224	118.418	18.7033
ENSSSCG00000009541	ABHD13	15.3655	14.4922	14.5891	19.3907	15.1507	17.0345	18.5801	20.1512	19.4997	20.5948	16.4686	15.4891	14.186	12.6166	16.6482
ENSSSCG00000030229	ABHD14A	9.47276	3.4877	8.13942	2.81886	6.43881	8.72964	3.74895	5.93518	5.3203	4.95624	4.19165	4.48707	4.75819	4.1956	3.39591
ENSSSCG00000017789	ABHD15	3.52233	4.38099	0.823514	1.98648	0.908646	0.338501	6.89437	4.09837	2.88924	2.0811	1.16799	0.310377	2.72626	1.53227	45.1525
ENSSSCG00000034923	ABHD16A	12.1519	16.4371	12.2828	12.9974	15.341	17.6282	19.8802	19.2801	17.4979	16.4124	20.4562	21.8623	17.269	19.098	17.767
ENSSSCG00000013442	ABHD17A	125.548	111.435	122.42	93.6412	129.135	109.453	131.805	115.095	130.238	106.152	163.956	156.374	153.982	138.004	164.079
ENSSSCG00000021802	ABHD17B	9.53254	17.4609	15.2169	23.8597	11.0104	11.9952	8.86909	12.5923	11.8119	11.4473	11.8134	12.2317	16.2453	15.9502	15.8682
ENSSSCG00000001782	ABHD17C	0.492043	1.99344	0.47843	0.359778	3.19939	3.06522	0.945745	0.440223	1.60445	0.582251	0.87937	0.381931	62.1424	65.0887	1.67503
ENSSSCG00000009074	ABHD18	16.287	8.83185	23.5239	17.5017	6.77937	8.62663	4.04101	4.66604	6.63453	10.1235	8.66283	18.2969	8.07105	13.1802	4.85967
ENSSSCG00000001835	ABHD2	9.72091	11.824	7.9266	7.9939	28.7306	25.8646	14.3802	13.52	31.7747	25.7869	18.7229	14.6435	29.2153	23.9263	14.0273
ENSSSCG00000028010	ABHD3	7.69871	23.6086	7.08217	11.2795	20.6369	17.1427	17.8042	23.003	35.3569	30.7962	28.4893	18.8502	8.84654	7.91734	27.3832
ENSSSCG00000002051	ABHD4	1.2852	2.51467	1.17709	1.34469	1.80355	0.910444	4.06037	2.58674	2.87884	1.45897	3.2381	1.78898	1.46047	1.14286	12.6067
ENSSSCG00000011297	ABHD5	5.20018	15.4578	4.38933	13.2229	9.58514	9.45006	8.58717	14.4723	13.134	11.4677	10.2725	8.07874	28.6417	21.4685	10.8519
ENSSSCG00000011470	ABHD6	15.2976	15.6485	16.6083	21.4973	18.6732	16.6569	16.9016	19.1561	27.717	31.2936	18.3768	21.0731	24.3805	17.4418	19.3898
ENSSSCG00000031877	ABHD8	3.38475	8.42535	4.6454	5.21319	9.99752	8.0176	10.389	12.179	11.5265	5.48127	10.7644	7.78029	2.70504	1.92627	8.08773
ENSSSCG00000024127	ABI1	117.479	151.492	128.643	190.407	123.979	116.718	60.3966	111.502	143.062	137.79	99.343	106.866	162.33	126.772	64.4372
ENSSSCG00000034630	ABI2	0.661415	0.221168	0.0161705	0.00916371	0.490971	0.276145	0.180894	0.0359995	0.220217	0.222112	0.0955296	0.0472965	0.107731	0.0711141	0.947371
ENSSSCG00000005706	ABL1	6.18702	3.17738	5.03049	3.27538	9.00518	6.38963	5.40132	4.78637	8.18302	5.78425	7.71768	5.69534	6.71847	6.43719	12.6552
ENSSSCG00000024674	ABL2	0.826954	0.420272	2.49097	0.789006	1.64482	2.63659	0.406462	0.139971	1.28262	2.02312	1.51499	4.08279	0.803937	2.10395	0.839928
ENSSSCG00000010651	ABLIM1	69.5479	49.7394	118.087	57.5361	218.107	163.961	124.473	87.5994	249.991	194.431	154.437	163.052	3.81099	3.19587	57.1802
ENSSSCG00000014430	ABLIM3	0.137887	9.21787	0.00331914	0.00916371	1.24677	0.817929	0.924841	0.908443	0.683261	0.888467	28.2466	28.9117	0.024955	0.0023305	3.90034
ENSSSCG00000017804	ABR	30.7671	29.8561	14.5022	8.81535	46.355	44.4048	79.1658	53.0326	68.6691	58.7369	94.7885	85.5658	90.2687	93.7171	69.6225
ENSSSCG00000004145	ABRACL	213.443	308.212	197.961	387.03	509.395	575.148	335.31	530.371	558.193	630.977	224.909	209.218	357.008	335.476	150.456
ENSSSCG00000009234	ABRAXAS1	13.4139	7.58068	14.1811	12.2748	18.293	14.0171	13.7456	13.9105	14.4044	11.9384	17.0809	17.3349	8.93805	8.7851	14.6588
ENSSSCG00000010737	ABRAXAS2	15.144	11.3142	16.959	13.8102	15.7272	12.2691	10.8197	8.81818	14.6606	12.7001	13.6946	13.5424	20.4467	21.2709	13.8078
ENSSSCG00000038191	ABT1	8.70901	16.9185	7.58065	16.4504	9.4101	8.49488	9.20436	10.8614	10.1535	10.0753	10.8215	6.8566	7.96263	6.24675	10.6619
ENSSSCG00000024827	ABTB1	18.3864	14.2108	24.5644	15.1588	17.5607	23.9599	12.0758	10.8012	15.9962	21.7792	20.638	27.5024	13.7477	15.2749	16.6276
ENSSSCG00000013303	ABTB2	1.5188	0.513286	0.309332	0.248537	0.254114	0.256411	0.648261	0.636751	0.594165	0.139318	0.114601	0.0598969	0.142574	0.186162	2.38784
ENSSSCG00000011250	ACAA1	25.9365	22.7903	24.4247	19.4003	20.762	22.929	20.5094	15.606	21.1743	21.404	25.2694	24.4419	51.6279	54.394	17.7552
ENSSSCG00000004510	ACAA2	5.39223	17.0265	4.0497	10.9985	5.88213	6.56672	9.08095	13.4789	5.80597	8.00534	12.9522	10.4019	14.1333	17.0122	11.1825
ENSSSCG00000017694	ACACA	2.22512	2.09732	3.63659	2.26817	3.33189	2.91915	2.78521	2.6242	4.56947	3.99787	3.93062	3.14801	2.84655	3.15032	2.45734
ENSSSCG00000009836	ACAD10	7.03673	6.12757	7.81988	6.02664	8.32815	7.52899	7.48466	6.27855	5.74997	5.88364	7.26336	8.42113	7.21466	7.20006	3.69058
ENSSSCG00000011629	ACAD11	4.60339	14.1679	4.9067	12.3936	8.4278	9.85754	7.3695	11.2783	6.4224	5.96267	8.73672	9.43007	4.44902	4.26421	4.71294
ENSSSCG00000023354	ACAD9	2.06385	2.42369	2.57093	3.71019	4.78616	4.58171	4.4216	4.69392	3.92433	4.44856	3.10589	2.48864	3.37458	3.40185	2.13513
ENSSSCG00000016156	ACADL	22.3552	24.4804	17.2956	18.3399	24.9537	22.763	22.9924	25.5583	24.5678	23.8969	32.5783	33.3387	24.3242	20.5886	37.007
ENSSSCG00000003776	ACADM	51.6666	55.3628	42.0296	57.9107	37.2477	32.0875	32.2329	40.6375	47.904	50.1207	41.5715	35.9105	70.6833	76.7688	46.3454
ENSSSCG00000009916	ACADS	47.3777	49.7711	51.1267	46.3765	50.6813	54.59	46.3157	53.9901	47.2619	57.3071	43.8248	45.9644	41.0327	43.0284	38.3799
ENSSSCG00000010723	ACADSB	18.7988	30.7782	13.5599	28.1898	23.8151	21.2716	21.4971	30.2439	21.863	20.4659	18.056	17.2666	20.109	16.264	32.1974
ENSSSCG00000017947	ACADVL	40.1326	34.2622	28.5098	27.0512	35.3586	33.3036	39.2293	33.8299	43.4988	34.099	36.6824	38.4677	36.2026	33.2556	51.7856
ENSSSCG00000017943	ACAP1	103.845	54.3038	131.039	44.0997	183.437	157.323	151.359	78.9686	192.691	173.048	229.76	229.984	35.2289	24.8262	123.251
ENSSSCG00000031147	ACAP2	32.572	15.563	24.9363	21.406	26.4768	21.0376	12.4905	13.2229	33.1936	24.254	25.0373	24.6803	38.5111	31.874	22.0866
ENSSSCG00000003329	ACAP3	1.77461	1.44948	1.3302	1.17042	2.42292	2.3893	2.55693	2.54002	2.99095	3.60509	2.59234	2.4198	2.52134	3.24181	2.53876
ENSSSCG00000026153	ACAT1	82.4104	78.9162	67.1042	91.9224	72.3861	62.0088	85.9213	89.2156	67.2728	65.5477	79.9877	59.2391	100.669	96.8091	78.0302
ENSSSCG00000004049	ACAT2	15.9659	28.882	23.5388	31.4139	9.8058	10.0308	17.9497	18.2984	7.99717	5.58486	21.6081	12.5095	14.2704	7.44297	11.3217
ENSSSCG00000024180	ACBD3	18.5249	17.2703	20.3587	13.5157	24.5492	30.0184	13.1362	14.6156	30.3725	35.9715	27.0033	36.1389	18.9726	21.6756	30.8251
ENSSSCG00000017337	ACBD4	10.8787	5.2441	13.416	5.58963	8.43053	13.2966	6.72154	8.70768	6.88079	8.00916	7.75288	13.9999	5.56724	7.22907	4.90696
ENSSSCG00000011064	ACBD5	5.86216	4.89127	6.00311	5.76188	10.4849	10.4663	7.1133	5.49273	13.7393	13.4453	6.10745	8.33452	18.1896	15.8603	3.72719
ENSSSCG00000015534	ACBD6	32.8442	44.0381	42.3632	45.1603	57.0097	52.8106	56.694	53.1601	42.663	50.509	52.4883	46.447	39.7551	40.8606	39.8167
ENSSSCG00000040937	ACCSL	1.85376	4.49116	2.85711	4.71066	3.36746	3.5329	3.07083	2.93729	3.61723	4.01389	3.65255	3.53042	2.33105	2.24529	3.75285
ENSSSCG00000029590	ACD	41.9386	30.1869	41.166	25.9744	30.2255	32.877	37.0679	28.0367	29.6505	32.704	38.3696	45.6589	12.0233	16.998	41.7815
ENSSSCG00000032723	ACER3	5.45206	8.33666	1.78802	8.49235	1.5923	1.93685	0.867445	1.4929	2.33047	3.61472	2.25906	2.12589	68.8298	68.4547	5.36301
ENSSSCG00000002034	ACIN1	87.0093	22.8572	97.4952	30.2173	76.4502	84.2674	67.2826	32.2329	66.7997	81.5401	90.3142	120.527	37.5241	51.1698	66.8806
ENSSSCG00000016322	ACKR3	2.26709	4.73909	1.0701	3.092	5.2374	5.75622	3.09698	2.12913	3.6458	7.01728	2.14694	3.94329	2.53019	6.51576	0.805897
ENSSSCG00000017421	ACLY	33.6179	22.4709	27.7426	21.2515	35.8013	23.7086	38.4855	26.777	43.9634	29.6945	54.3531	32.0048	42.8936	34.7753	49.1838
ENSSSCG00000023807	ACO1	7.52566	6.71942	8.8087	7.12095	4.60169	1.59582	4.03401	2.70156	5.78425	3.09366	5.30714	2.34563	29.0411	38.1687	8.5254
ENSSSCG00000000064	ACO2	78.4176	71.1751	62.8161	44.2105	109.176	76.8002	74.5852	64.9065	112.334	69.8179	106.698	78.2602	93.3908	90.0888	101.738
ENSSSCG00000037559	ACOT11	0.862796	1.11162	1.63385	0.929836	0.92227	1.32534	5.01178	3.43557	1.38606	2.89068	4.63354	5.91359	2.13079	4.94753	10.8413
ENSSSCG00000036411	ACOT13	26.8806	104.327	28.8464	79.3044	29.4577	63.2786	36.6395	119.481	20.3979	40.1755	32.4276	30.4262	18.4449	21.0751	32.6171
ENSSSCG00000002349	ACOT4	8.53266	31.5086	10.0122	46.0873	8.3745	14.9047	11.9385	23.4799	8.98836	17.3964	7.04584	8.49841	6.11876	6.67727	14.84
ENSSSCG00000003377	ACOT7	22.4592	21.5467	6.67089	14.4161	30.5027	24.8762	38.3331	29.4471	35.2604	27.9393	39.2371	18.5034	14.2572	10.9459	36.6391
ENSSSCG00000007426	ACOT8	14.0247	30.0693	9.35222	16.4184	11.386	13.5456	15.6652	21.633	11.4546	12.2332	16.0781	16.5059	11.1158	11.0127	21.5703
ENSSSCG00000012172	ACOT9	22.625	47.4444	27.5818	47.9807	17.8477	19.6064	32.2208	36.325	27.819	30.9966	42.1425	43.724	37.9842	36.2026	38.2667
ENSSSCG00000017198	ACOX1	28.1821	20.4943	26.8176	20.5803	37.1917	27.285	33.2582	22.3505	42.6271	29.376	43.7083	29.0857	30.9957	24.6137	38.9541
ENSSSCG00000008724	ACOX3	7.92921	8.38894	8.56536	6.15923	12.0151	11.9498	9.43569	8.87737	10.9003	11.7645	12.4691	15.0714	10.6645	11.2724	9.22524
ENSSSCG00000037846	ACOXL	0.25553	0.107457	0.0181671	0.129608	0.612958	0.48557	0.221802	0.130736	1.14332	1.88352	0.312295	0.223276	0.00154798	0.0267982	0.0962386
ENSSSCG00000013242	ACP2	1.6074	3.11728	2.05498	1.25653	5.38288	3.8821	4.80943	4.62835	5.96083	4.48774	5.38468	5.89401	29.2719	29.656	3.43824
ENSSSCG00000024736	ACP4	2.70998	5.81829	2.50173	3.42741	2.41611	1.74057	2.92065	3.1723	3.02147	3.09978	3.1601	3.69322	5.59527	6.48227	4.02085
ENSSSCG00000032282	ACP5	66.1035	92.2152	115.549	95.8408	84.362	79.8462	145.761	121.774	130.161	94.2858	114.739	107.741	19.6269	16.7935	143.086
ENSSSCG00000006697	ACP6	17.5967	26.4407	17.895	24.7193	24.9109	24.4114	23.9964	31.0083	18.0467	19.7293	25.9582	21.3852	12.6493	10.1955	24.1519
ENSSSCG00000000700	ACRBP	21.0736	16.7482	31.4553	21.1397	24.1886	31.0056	20.4172	17.4872	15.7112	25.7322	30.4727	43.5493	14.0945	22.1897	17.378
ENSSSCG00000017566	ACSF2	68.2174	51.4347	76.109	54.3569	58.6785	65.8372	44.0162	47.6926	69.0824	73.5583	49.4531	63.2802	68.9931	74.9058	32.8686
ENSSSCG00000023866	ACSF3	10.5373	13.7088	12.9949	12.2949	11.1909	16.1964	9.87964	13.3598	10.4975	10.8819	8.06277	13.0545	7.52476	11.7092	8.14706
ENSSSCG00000015784	ACSL1	6.90289	6.53895	5.60218	6.59609	12.056	10.2418	8.89447	7.7078	17.9439	16.6187	17.4142	13.6341	25.8319	25.8994	9.20661
ENSSSCG00000016223	ACSL3	8.04013	6.95662	5.81421	4.78011	14.7964	14.4813	9.61293	14.1546	7.65002	6.46452	17.1441	13.3897	3.9788	3.36813	16.7982
ENSSSCG00000012583	ACSL4	47.2115	26.9468	34.2918	32.1736	21.581	19.8116	15.0332	13.9265	37.1717	40.741	27.5661	27.776	98.0971	94.7392	22.9394
ENSSSCG00000031789	ACSL5	65.8501	53.9588	67.8293	64.2953	59.5853	45.2182	67.24	58.0235	79.9553	75.873	48.8764	35.2835	73.9203	72.928	49.6482
ENSSSCG00000026453	ACSM5	0.560657	0.32661	1.05031	0.767068	1.10968	1.49864	0.569035	0.570425	1.366	1.20776	0.83784	0.929032	0.888462	0.966267	0.752195
ENSSSCG00000007133	ACSS1	55.6062	45.4971	47.2203	41.6881	28.818	22.943	40.1073	34.821	33.6161	29.2643	47.2078	40.8112	43.4936	50.0452	57.1013
ENSSSCG00000007286	ACSS2	14.0439	13.7945	8.12993	9.54034	16.4456	13.8858	16.2318	15.2856	15.6389	10.7732	15.5759	11.4909	62.4323	50.3093	12.9201
ENSSSCG00000000939	ACSS3	7.98601	1.08474	0.387575	0.149129	0.959323	1.60204	1.39823	2.0865	1.86056	0.534037	1.24349	1.69482	19.7904	19.535	11.1143
ENSSSCG00000007585	ACTB	3058.85	1714.54	1974.69	1242.78	3336.61	1192.12	4392.78	1438.59	4757.33	2095.61	3893.76	1528.99	4050.85	2743.18	5871.28
ENSSSCG00000011762	ACTL6A	28.5956	43.7495	16.3705	32.5916	25.1771	19.2482	21.6042	27.8661	25.7393	21.5808	31.448	22.8318	17.08	12.0717	31.0477
ENSSSCG00000036702	ACTN1	44.4056	59.505	42.2147	30.5106	205.915	136.042	80.1348	89.5355	193.09	102.957	160.016	126.989	10.7672	4.88719	61.8599
ENSSSCG00000010144	ACTN2	0.42877	3.8423	0.912273	2.23508	3.23272	2.76018	0.919977	2.52835	3.09366	1.57832	2.19182	1.67052	0.339276	0.803937	0.833941
ENSSSCG00000002965	ACTN4	30.7302	43.9293	21.5015	18.2575	59.1826	38.0137	55.7052	36.113	98.7903	57.8884	150.553	99.429	42.8244	41.3591	136.22
ENSSSCG00000022299	ACTR10	61.0526	58.349	56.0695	69.8395	53.3821	55.6746	49.113	58.5844	50.5525	64.4865	56.7823	56.095	128.397	143.726	59.737
ENSSSCG00000010585	ACTR1A	37.6449	36.2164	30.5106	26.9685	33.0088	31.4623	32.6578	27.5251	37.9723	38.7694	52.9529	54.681	34.5797	37.9319	40.7397
ENSSSCG00000008194	ACTR1B	14.56	10.145	13.4965	10.8518	16.217	17.2916	15.851	15.9812	17.7168	23.0216	14.735	20.0799	12.5302	14.8596	31.5291
ENSSSCG00000008358	ACTR2	301.052	264.269	230.553	324.629	307.857	190.504	212.308	219.317	450.124	285.033	284.103	193.614	477.125	364.663	422.571
ENSSSCG00000015710	ACTR3	297.709	323.146	214.367	357.248	326.591	248.131	332.596	337.856	394.994	325.361	321.046	221.622	540.246	455.368	395.674
ENSSSCG00000007349	ACTR5	4.48444	5.35782	6.20042	5.65958	6.3832	5.74346	6.35626	5.52809	5.64128	5.52199	6.67981	5.61142	3.25812	3.50191	5.51443
ENSSSCG00000025682	ACTR6	23.0778	25.2482	16.699	30.264	24.9897	29.2546	18.0405	29.1493	17.9901	19.9044	20.6266	24.8223	12.7025	8.65716	27.7303
ENSSSCG00000011458	ACTR8	11.0745	14.6518	14.8774	12.978	13.0789	18.9444	9.98731	13.1167	10.9733	17.1026	14.134	21.5447	8.95681	12.1206	10.5226
ENSSSCG00000015874	ACVR1	0.466971	0.054203	0.0848942	0.243539	0.723599	0.279917	0.0323347	0.282302	1.76712	1.2512	0.193965	0.210741	12.514	8.85956	0.718682
ENSSSCG00000000233	ACVR1B	0.308806	0.301772	0.224711	0.283323	0.176959	0.175388	0.0255524	0.0461246	0.2289	0.248522	0.125396	0.130676	8.74041	8.96817	0.138687
ENSSSCG00000015669	ACVR2A	0.859818	12.0264	0.550056	0.257523	2.87444	2.16948	0.84307	0.562594	0.332603	0.39044	52.6359	67.8247	1.00847	1.39378	1.22409
ENSSSCG00000000232	ACVRL1	0.994736	0.679432	0.14227	0.00916371	0.0355618	0.37978	0.00132549	0.0394448	0.0767735	0.316989	0.0652183	0.00498369	145.739	143.158	0.0156662
ENSSSCG00000002379	ACYP1	27.233	45.8943	25.4037	41.8785	16.6991	25.1466	20.1572	24.322	14.9299	22.9761	26.6866	32.5783	11.9319	12.9084	28.0752
ENSSSCG00000021255	ADA	12.0175	5.56466	0.366057	1.1013	4.65141	19.3047	3.14169	6.69731	12.9653	17.2787	3.84287	14.1686	15.0326	19.5002	41.0446
ENSSSCG00000035218	ADA2	35.1413	32.0534	36.8681	38.2902	0.642698	2.22119	0.213255	1.03862	0.717445	1.20946	0.844879	0.408917	366.647	289.753	1.40613
ENSSSCG00000004710	ADAL	4.85932	5.14759	7.06536	7.075	6.23161	6.04105	5.3363	6.09144	5.16142	7.91633	6.87222	9.48799	4.1507	4.01382	6.10282
ENSSSCG00000004595	ADAM10	25.2783	22.0976	23.6591	23.5054	53.2431	33.3207	28.0562	23.8467	47.0732	29.7013	43.9706	27.8196	77.1522	72.0893	51.4522
ENSSSCG00000006533	ADAM15	14.6704	9.98424	8.77774	5.10954	17.6019	23.7195	5.63132	3.62534	35.4608	34.8644	13.3134	18.2158	27.5162	35.5049	12.4334
ENSSSCG00000008641	ADAM17	14.0133	7.69871	16.1493	10.7208	10.8857	8.51803	8.63809	5.06614	12.5384	12.2934	12.6005	11.3583	25.3026	23.5105	10.3657
ENSSSCG00000017052	ADAM19	11.5249	10.0287	11.6781	12.0615	5.10151	3.75111	2.89826	1.82772	20.6894	17.1283	4.92721	1.8505	30.5428	21.2547	2.81313
ENSSSCG00000009644	ADAM28	1.54259	1.14808	0.159964	0.291927	0.585969	0.663348	1.47883	1.69004	0.237906	0.2023	0.170716	0.449939	28.6121	37.8409	0.129343
ENSSSCG00000010772	ADAM8	22.0266	12.3473	17.5469	10.6208	0.665412	0.59203	1.69559	1.67263	2.24883	1.65356	2.3786	1.16236	10.0295	10.9064	2.80122
ENSSSCG00000015808	ADAM9	8.18054	4.68799	12.6181	9.79202	1.11625	1.42645	0.663073	0.385599	2.17016	2.08352	0.426042	0.562204	27.8332	34.5066	1.15293
ENSSSCG00000009645	ADAMDEC1	0.953859	0.959433	0.0423674	0.0737236	0.0204304	0.00664399	0.00132549	0.00422539	0.00170735	0.00247515	0.0011845	0.0686291	0.878319	0.309758	0.0314586
ENSSSCG00000026994	ADAMTS10	7.13157	7.99159	7.95283	3.22139	15.294	23.735	21.1456	16.3086	4.30037	8.42269	43.1155	73.4468	0.39483	0.365597	30.4096
ENSSSCG00000016816	ADAMTS12	0.693773	0.0457501	0.0498987	0.0760396	0.0185483	0.0172673	0.00749999	0.0380278	0.107882	0.0379613	0.0619988	0.0418431	1.44007	0.971663	0.814634
ENSSSCG00000015250	ADAMTS15	0.75089	0.532895	2.33583	2.02269	0.623646	0.528252	0.958677	0.311868	1.19234	1.02297	0.614088	0.798249	0.113853	0.118047	0.828876
ENSSSCG00000024043	ADAMTS2	0.0159734	0.0551757	0.0196702	0.0719947	0.0390685	0.0398305	0.0102674	0.0378188	0.0315698	0.00247515	0.197178	0.21803	2.7126	2.38697	0.00079626
ENSSSCG00000016943	ADAMTS6	9.39186	1.83787	9.90929	4.84424	5.49528	8.3106	3.34615	1.54712	3.82862	6.02782	6.86266	10.0877	0.994544	1.72898	2.11844
ENSSSCG00000011496	ADAMTS9	0.00416835	0.0363717	0.00331914	0.0457821	0.781057	1.584	0.567044	0.447145	0.432226	0.738895	0.00590859	0.0269061	0.00154798	0.0023305	0.0554109
ENSSSCG00000006651	ADAMTSL4	2.59849	0.744146	0.514196	0.398491	0.211117	0.35157	0.251456	0.26487	0.374788	0.466122	0.0875813	0.31909	27.8589	25.0118	0.130036
ENSSSCG00000007547	ADAP1	4.94267	4.34764	0.119864	0.476173	4.73442	6.98496	5.24449	3.47972	9.36629	7.41559	3.267	3.62485	51.6645	61.842	11.3268
ENSSSCG00000017738	ADAP2	0.51016	0.673655	0.199701	0.242627	1.35269	0.201281	0.0514795	0.00422539	0.316989	0.28412	0.305613	0.0567307	21.1173	26.0762	0.275007
ENSSSCG00000006543	ADAR	9.87461	8.1346	12.7221	6.99507	19.8603	20.4805	9.32877	7.85255	22.2721	20.9119	17.728	25.2296	14.1542	26.145	13.6034
ENSSSCG00000012089	ADARB1	0.802912	2.81705	0.45996	0.71147	7.5796	7.52644	1.92211	2.85488	2.82012	3.40619	8.05799	11.4713	0.391524	0.755807	0.981481
ENSSSCG00000039598	ADAT2	4.65413	9.21547	3.51653	7.62776	7.40684	10.6499	8.08843	10.933	5.92348	8.94931	3.5327	4.23846	5.29457	5.81682	5.00712
ENSSSCG00000038810	ADAT3	3.61342	5.59503	5.51924	7.0267	2.1264	2.3507	4.16207	5.80784	2.38482	1.71959	4.70239	4.55083	1.72525	1.26054	2.90923
ENSSSCG00000016496	ADCK2	9.37242	8.69527	9.26753	7.16964	11.7066	12.8781	11.9583	10.8993	13.0135	10.633	11.8629	9.92059	12.9869	13.9948	9.0765
ENSSSCG00000005907	ADCK5	24.4902	7.58972	23.1794	12.7148	26.9707	29.8432	16.0142	9.56828	17.2629	17.0713	24.1036	27.0383	5.7806	7.24863	11.3815
ENSSSCG00000008578	ADCY3	2.07399	3.67897	1.43093	3.86511	2.94732	3.34075	2.46046	2.42493	2.39526	2.03858	2.03428	1.69365	1.55458	1.29987	6.75426
ENSSSCG00000001988	ADCY4	0.509004	0.683281	1.06334	0.270376	2.64749	3.79416	2.14406	2.36276	2.22397	3.076	4.65669	7.80245	2.76027	6.61162	1.34374
ENSSSCG00000000175	ADCY6	1.11542	0.568655	0.493434	0.28744	0.313688	0.203504	0.105072	0.175184	0.35072	0.123736	0.442285	0.627446	3.05747	1.14586	0.0260183
ENSSSCG00000039408	ADCY7	89.7567	33.8684	65.2677	25.5619	89.624	103.734	57.4822	38.5386	63.3791	75.7922	64.0797	92.2038	48.1597	70.6295	132.802
ENSSSCG00000031717	ADCY8	0.293884	0.979119	0.593974	0.732945	0.404315	0.548372	0.235493	0.569035	0.467219	0.794449	0.377547	0.676841	0.274108	0.352726	0.322488
ENSSSCG00000007950	ADCY9	0.777425	1.06229	0.690514	0.558752	1.96809	1.34701	1.68922	1.65736	0.78706	0.612306	2.72248	2.91892	4.79664	5.08739	1.43649
ENSSSCG00000008692	ADD1	119.853	91.8264	90.4686	48.8906	205.159	129.135	151.026	97.0229	226.852	133.643	222.527	149.326	64.2873	49.0063	138.467
ENSSSCG00000010621	ADD3	127.571	105.717	134.081	99.7535	371.537	226.496	196.975	154.612	377.228	269.479	271.383	202.522	69.2519	49.842	260.295
ENSSSCG00000008753	ADGRA3	0.44646	0.220227	0.363855	0.276236	0.00387933	0.00100702	0.00132549	0.00422539	0.0302862	0.00247515	0.0191739	0.0374682	2.15167	2.31457	0.13121
ENSSSCG00000009745	ADGRD1	1.15395	0.105573	0.028498	0.00916371	0.0750519	0.0197739	0.171169	0.049935	0.923851	0.0711691	0.0011845	0.00498369	0.0285978	0.0023305	5.20799
ENSSSCG00000013787	ADGRE3	0.354176	0.0736065	0.452753	0.571155	0.00387933	0.125379	0.00132549	0.00422539	0.00170735	0.00247515	0.0797152	0.00498369	44.1223	32.8165	0.226212
ENSSSCG00000013775	ADGRE5	118.116	86.3644	110.343	57.1382	88.7165	62.204	123.647	63.0702	144.832	87.9765	241.585	129.532	382.197	338.605	228.381
ENSSSCG00000002815	ADGRG1	41.4569	8.12612	0.686222	0.366678	1.16941	2.83244	140.788	72.8254	25.0612	23.8326	1.65163	0.577718	21.6756	19.3558	2136.19
ENSSSCG00000002814	ADGRG3	0.491132	0.22373	0.192345	0.170877	0.191876	0.214108	0.151787	0.0453738	0.254888	0.707951	0.140901	0.274437	5.6968	4.24409	0.494026
ENSSSCG00000025503	ADGRG5	51.0549	32.0223	9.69211	10.6292	52.5109	50.1948	39.6363	33.6771	58.5638	59.2546	89.2823	97.8764	15.459	12.9752	44.5185
ENSSSCG00000004139	ADGRG6	1.17362	1.54143	1.25405	1.0081	0.0187485	0.00594745	0.00132549	0.00422539	0.0281312	0.0611628	0.0115445	0.00498369	1.13644	0.777789	0.0914139
ENSSSCG00000013773	ADGRL1	1.10266	0.843579	0.207947	0.188579	9.74249	12.1537	6.13168	5.64007	1.58747	1.30425	4.44268	4.9968	0.616159	0.779514	1.87568
ENSSSCG00000003761	ADGRL2	0.133366	0.141404	0.038076	0.0413205	0.0708246	0.0548685	0.00132549	0.0955049	0.0755721	0.0212826	0.027947	0.0454458	14.5261	7.6477	0.106784
ENSSSCG00000035025	ADGRV1	0.00748789	0.058201	0.034554	0.127431	0.103929	0.0849159	0.035312	0.0288284	0.264496	0.575742	0.142462	0.326609	0.00154798	0.0192274	0.0588178
ENSSSCG00000009185	ADH5	103.534	122.612	96.2649	128.926	112.515	120.482	119.835	146.297	94.1908	108.451	134.789	104.803	83.1739	77.0242	88.4302
ENSSSCG00000029161	ADI1	36.1933	45.8163	34.3643	44.1694	35.9172	34.3094	36.8637	35.6917	38.2855	46.514	29.492	22.1884	39.7294	34.432	33.6301
ENSSSCG00000039103	ADIPOQ	0.121382	0.071886	0.22806	0.00916371	0.126629	0.048795	0.0431617	0.0291047	0.0709109	0.19018	0.0718157	0.158842	2.1195	0.401298	0.00924013
ENSSSCG00000000757	ADIPOR2	19.9449	22.7221	20.8	19.0862	31.3708	25.1605	24.5247	25.3585	27.6077	22.2353	32.4078	25.9774	24.9199	23.7954	28.2962
ENSSSCG00000010315	ADK	11.8664	21.463	9.62636	30.4032	7.06477	7.71928	7.99812	15.8578	8.57648	12.8857	6.61334	9.01947	15.422	14.8296	11.6892
ENSSSCG00000013408	ADM	0.20075	2.70881	0.374482	0.257129	0.00387933	0.073847	0.00132549	0.00422539	0.0336962	0.0457402	0.0011845	0.534526	0.191027	5.0309	0.0525466
ENSSSCG00000007473	ADNP	48.5792	19.9765	38.2732	23.7988	70.415	43.2524	43.8997	27.3734	64.2606	37.9723	63.8853	38.8614	34.9645	23.3706	63.7602
ENSSSCG00000038632	ADNP2	11.9802	12.6457	11.7352	11.9581	20.9899	13.1154	12.648	13.4699	16.6783	10.5019	17.6823	13.2	13.4477	9.53376	15.9915
ENSSSCG00000031360	ADO	9.26572	8.96549	5.78507	11.4926	9.7177	6.60195	10.6018	8.12552	9.54734	6.15721	8.90887	5.50707	27.1294	19.1342	13.3199
ENSSSCG00000010054	ADORA2A	0.0787591	0.629239	0.00331914	0.00916371	0.461537	0.282934	7.98531	6.70175	2.67768	2.44815	0.897065	0.535044	2.54871	2.0833	7.38282
ENSSSCG00000035051	ADORA2B	3.27895	3.3016	4.63806	3.95829	5.19494	3.22512	3.37151	2.77581	6.12351	6.1532	6.16837	4.27606	1.83176	1.65347	1.72238
ENSSSCG00000006788	ADORA3	1.81382	1.25273	0.165905	0.420724	0.0922906	0.00100702	0.0239655	0.00422539	0.127715	0.0919916	0.0424574	0.0508842	8.77974	4.31981	0.00079626
ENSSSCG00000001925	ADPGK	21.5839	29.4663	21.234	25.1298	30.4398	25.1902	28.7648	29.0141	32.3876	25.3727	36.5611	25.5812	44.1414	36.0223	28.1821
ENSSSCG00000011896	ADPRH	2.56188	3.73805	6.83824	3.84059	2.81259	2.96463	1.58891	1.62592	3.16842	4.49527	2.84542	5.96968	4.525	5.07139	3.60611
ENSSSCG00000018009	ADPRM	3.28733	2.6169	4.04705	3.64159	3.37755	2.64115	2.4589	1.2557	2.78449	4.29145	4.23846	5.79785	2.74106	2.86108	4.8101
ENSSSCG00000003634	ADPRS	16.4896	28.1535	13.8873	23.747	17.5803	18.4476	17.5916	21.6111	22.4398	19.468	15.6505	12.9475	14.213	12.5897	11.9547
ENSSSCG00000017041	ADRA1B	1.99894	0.0117741	0.027719	0.00916371	0.00387933	0.00100702	0.00132549	0.00422539	0.00170735	0.00247515	0.0011845	0.00498369	0.00154798	0.0464432	0.0639981
ENSSSCG00000008703	ADRA2C	0.838994	10.5639	0.00331914	0.00916371	0.00387933	0.00100702	12.5219	8.30102	0.297474	0.124059	15.5639	13.5768	0.00154798	0.0023305	1.51885
ENSSSCG00000010647	ADRB1	0.0183895	0.0117741	0.17362	0.00916371	0.00387933	0.0483	0.657302	0.691493	0.00170735	0.00247515	0.0541658	0.455475	0.25982	0.291686	8.35414
ENSSSCG00000038598	ADRB2	0.405125	0.678784	0.0804913	0.327426	0.00387933	0.275135	6.60429	3.19116	0.505101	0.436854	0.497179	0.551047	10.2459	13.4073	15.2667
ENSSSCG00000038718	ADRM1	52.699	52.2425	39.5854	38.3725	50.5616	48.0112	59.2063	52.4941	65.0026	66.3575	55.4448	48.8764	63.8518	62.8715	56.5928
ENSSSCG00000000077	ADSL	44.3531	52.9994	36.2561	45.7669	95.977	107.169	72.4383	83.6026	87.9299	100.207	56.9276	61.8011	27.2996	25.5135	37.693
ENSSSCG00000010874	ADSS2	43.318	39.2372	41.0055	55.3535	57.2983	57.7118	39.7616	45.4926	57.0542	56.3404	51.0123	41.3719	35.5627	33.0817	36.9459
ENSSSCG00000000587	AEBP2	17.1009	8.30523	20.6451	14.9344	24.2916	20.9964	16.0273	12.0298	24.7798	23.8727	21.0731	22.955	19.4248	15.79	21.8573
ENSSSCG00000005102	AEN	9.70364	8.94475	9.44985	9.67716	16.7032	13.834	16.9376	17.5916	13.3919	13.6615	7.33603	7.84703	3.90409	4.11644	5.84301
ENSSSCG00000004018	AFDN	0.121474	0.0686067	0.257129	0.102759	2.08674	2.24144	0.078982	0.0911385	1.82136	2.43948	0.0134505	0.0628411	0.0492877	0.0023305	0.00882605
ENSSSCG00000023593	AFF1	1.96984	1.20093	1.84987	0.987232	8.38129	8.93053	4.64889	3.23721	11.1679	13.7882	6.739	7.68089	11.1441	17.6365	8.1022
ENSSSCG00000014291	AFF4	4.2598	2.72136	8.93933	3.81061	8.57283	12.2937	2.91312	3.16281	8.99694	13.3956	9.31429	21.1118	10.3327	16.2404	6.70919
ENSSSCG00000040199	AFG1L	4.15131	4.00253	6.19735	4.6947	4.22835	4.01348	3.045	3.40281	3.37111	4.95491	3.85781	5.67628	5.03594	6.92691	2.426
ENSSSCG00000033636	AFMID	111.094	15.3926	125.663	55.2579	13.8858	30.0712	7.17672	6.51388	8.00251	22.1393	8.68273	24.6173	8.8302	16.8037	5.67994
ENSSSCG00000008363	AFTPH	46.9561	33.6624	49.3818	40.0533	55.8424	43.4693	30.5863	27.8016	60.7458	50.7723	57.2889	60.3266	46.9392	44.2599	54.3766
ENSSSCG00000015772	AGA	11.4277	23.9703	14.3684	21.589	15.0004	20.196	16.9737	25.0796	17.3806	26.6905	20.1946	23.0818	21.5189	23.3827	17.1195
ENSSSCG00000016317	AGAP1	1.1001	2.09825	0.00331914	0.00916371	2.60179	3.13366	0.155979	0.391142	0.751298	0.506974	3.5277	5.61307	4.07142	4.44617	1.77003
ENSSSCG00000038732	AGAP2	11.6692	15.9038	16.9787	9.77068	32.4782	27.7333	20.761	18.1361	39.4901	27.1848	41.0257	39.3723	7.63069	6.92975	20.893
ENSSSCG00000025610	AGAP3	3.16766	2.56325	1.69731	1.11431	5.15943	4.82067	6.18346	5.11041	3.30913	3.73379	2.60129	2.76452	7.4977	6.83915	25.4513
ENSSSCG00000040838	AGBL2	0.484456	0.320396	0.997664	0.613751	1.57573	1.18874	0.757338	0.735712	0.81732	0.515166	0.834849	1.18153	1.98597	1.98452	0.387845
ENSSSCG00000031300	AGBL4	1.0522	6.82466	0.525318	0.45598	25.4213	23.0153	5.29628	6.58857	21.9684	19.6548	13.0453	11.4934	2.6428	2.30299	5.27063
ENSSSCG00000008558	AGBL5	7.45533	4.71358	6.59851	4.49406	5.02809	7.30066	5.6646	5.87166	8.04353	8.34947	8.13475	11.2413	4.13048	5.06327	8.72954
ENSSSCG00000016248	AGFG1	26.7301	34.2013	27.7742	37.7474	39.7238	33.6559	27.8016	38.0427	51.646	37.4263	34.0888	31.8324	39.5464	30.0319	32.3123
ENSSSCG00000007664	AGFG2	3.81518	7.87275	1.80982	2.23908	4.02212	3.39273	7.23581	6.91183	8.23249	6.42518	10.5209	7.2811	2.73192	2.40754	35.0807
ENSSSCG00000016492	AGK	16.9708	18.5359	16.1637	16.267	51.791	39.6846	35.0523	34.788	43.2907	37.6446	28.3063	27.5473	15.9575	16.2276	32.8625
ENSSSCG00000006872	AGL	3.0428	3.56234	2.34499	2.53816	6.31174	4.90802	4.54781	4.12725	6.99844	4.24621	5.90755	5.42989	6.15748	4.49339	7.68582
ENSSSCG00000003630	AGO1	51.5997	28.2201	64.5593	35.1702	49.5818	48.1472	35.5079	26.4806	57.0839	51.878	95.8016	101.072	38.6768	33.6263	58.7887
ENSSSCG00000005935	AGO2	5.73554	5.28416	8.11043	4.28748	7.01014	7.72896	5.74615	3.95302	12.7087	14.4875	8.46695	15.1352	7.82212	12.3937	10.4182
ENSSSCG00000001435	AGPAT1	28.8196	47.6485	22.2338	20.2137	47.2443	37.982	33.0348	44.3904	54.6574	30.6307	69.1088	57.0075	48.9428	40.0307	37.8477
ENSSSCG00000040845	AGPAT2	0.397083	1.13493	0.187628	0.291166	0.0892929	0.101939	0.173668	0.299176	0.0839684	0.0901304	0.109844	0.0925894	19.7165	18.0819	0.0805099
ENSSSCG00000038081	AGPAT3	7.91068	12.4704	6.87033	6.89782	15.0988	17.435	10.0899	11.8596	14.4907	16.8116	11.3781	10.7321	19.0403	21.9278	10.7997
ENSSSCG00000004033	AGPAT4	2.21611	6.70698	3.10064	3.84469	6.80183	7.59888	6.13869	5.53618	6.67559	5.86174	9.12483	7.57742	20.9974	20.4022	1.87044
ENSSSCG00000015755	AGPAT5	18.6543	18.5649	18.6071	19.6762	46.3936	41.673	24.8265	30.7872	30.6656	28.2597	26.5702	23.5933	23.8501	22.086	29.3159
ENSSSCG00000023983	AGPS	26.9218	29.4843	27.2714	29.4534	31.6373	24.2183	17.3715	19.7105	34.4593	39.1382	30.3695	36.19	45.2696	45.4655	41.3929
ENSSSCG00000022204	AGRN	0.398118	0.425297	0.175585	0.184609	1.12465	0.870498	0.432693	0.39658	1.15434	1.14104	0.723341	1.20149	0.942373	2.76483	0.525456
ENSSSCG00000010957	AGTPBP1	2.22119	2.07062	3.32759	3.04184	1.12093	0.804793	3.2564	1.5802	5.0742	4.09687	2.96855	3.26481	1.11844	1.20148	5.05522
ENSSSCG00000010863	AHCTF1	15.0138	7.29286	18.8688	10.0084	19.4478	20.6075	11.5988	7.60382	17.1605	21.1743	21.7056	28.4381	11.1317	18.4061	15.7464
ENSSSCG00000007278	AHCY	26.9034	54.3736	17.5386	43.7667	16.6454	16.3578	18.8352	27.6219	22.2903	18.9834	14.7242	11.2095	82.5083	65.9865	41.929
ENSSSCG00000006816	AHCYL1	33.4623	22.266	27.1178	24.4097	45.5451	37.8762	38.1503	32.8308	44.1249	39.6143	49.0315	38.5864	43.8272	38.1605	42.8984
ENSSSCG00000016568	AHCYL2	9.99375	15.6976	21.2298	18.569	21.1044	18.1246	21.6494	17.724	21.7874	17.8571	34.7789	30.1197	13.1305	11.7588	12.0205
ENSSSCG00000004166	AHI1	8.10103	5.39749	43.2969	12.7886	13.5315	12.7165	6.30774	6.57557	5.30454	5.55246	18.1221	22.199	1.04381	1.56148	3.97331
ENSSSCG00000030484	AHR	6.95662	13.0487	9.09687	4.87735	7.23603	6.58659	2.18759	1.85714	24.5019	36.6474	60.0103	98.7924	74.4612	141.058	0.581656
ENSSSCG00000030484	AHR	6.95662	13.0487	9.09687	4.87735	7.23603	6.58659	2.18759	1.85714	24.5019	36.6474	60.0103	98.7924	74.4612	141.058	0.581656
ENSSSCG00000002406	AHSA1	34.0272	38.5398	28.1701	33.1866	32.6876	26.4052	37.1055	36.2224	32.9801	32.9698	37.9167	27.8981	26.5058	22.9081	44.09
ENSSSCG00000037878	AHSP	14.3795	8.7834	1.11203	1.57797	0.0430529	0.0249844	0.020255	0.00422539	0.00170735	0.00247515	0.0272002	0.197178	0.234638	0.0602866	1.90901
ENSSSCG00000010835	AIDA	22.5361	24.2122	29.6832	31.9042	28.9565	27.336	22.4346	21.0616	33.2101	33.7501	30.5231	26.7782	24.785	27.097	21.3686
ENSSSCG00000032341	AIF1	7.83863	14.3843	0.721501	0.410777	0.506235	1.25638	0.366895	0.322438	0.463064	1.69535	0.695113	0.856494	110.295	150.652	1.00958
ENSSSCG00000012657	AIFM1	10.0258	13.1247	8.86823	13.6949	9.06901	8.57702	9.86265	12.0004	10.1619	8.78377	7.63542	5.78839	13.7898	12.7617	14.5624
ENSSSCG00000010258	AIFM2	6.13438	12.5301	5.19723	7.94819	6.56236	8.04536	8.07189	10.2137	9.88726	14.08	5.82473	6.48729	17.252	18.8837	12.7861
ENSSSCG00000004136	AIG1	4.26213	9.52422	2.171	3.8664	4.4641	4.3564	5.95897	6.72154	6.6848	7.10224	6.14697	7.51344	12.7936	16.2014	1.88386
ENSSSCG00000024168	AIMP1	33.4086	57.7859	40.4398	65.9138	42.2923	53.6498	50.7708	61.1748	37.2693	58.2591	41.4959	42.1673	54.3097	58.9738	44.9851
ENSSSCG00000024245	AIMP2	2.59365	5.68573	1.69927	5.12322	2.83462	2.83462	2.72776	2.4301	2.50595	2.47597	2.8243	2.63799	2.39356	1.90732	1.88488
ENSSSCG00000012904	AIP	39.7226	70.998	46.6115	57.9861	51.2905	55.6414	56.1298	60.9145	55.5357	52.0282	64.5895	62.3079	26.5644	21.539	55.7575
ENSSSCG00000029201	AJUBA	0.652363	2.02694	0.797601	0.563771	0.34209	0.857541	0.440713	0.778101	0.542509	1.34244	2.59733	3.88058	0.102608	0.172026	0.398272
ENSSSCG00000023595	AK3	36.1567	55.5836	25.707	52.6903	24.2527	24.3006	23.8765	37.2211	42.2131	29.7211	23.0908	23.6523	23.6458	15.7534	42.5418
ENSSSCG00000037053	AK6	6.55012	11.7961	6.82407	20.2835	6.50664	6.49741	7.08047	11.2619	6.07026	6.37559	5.25738	3.68285	6.3704	5.21303	5.95852
ENSSSCG00000039188	AK8	2.4162	2.37905	2.36947	3.48691	1.26282	0.568948	0.74499	0.260039	0.584459	0.471803	0.635022	0.412641	0.580118	0.468694	0.420007
ENSSSCG00000034994	AKAP1	1.27219	0.491132	1.32295	1.72451	5.03422	3.07488	2.32732	1.85273	3.05276	1.77528	2.39925	1.45827	1.49565	1.42591	0.67696
ENSSSCG00000024030	AKAP10	14.4896	9.88051	15.3737	8.75797	25.1196	22.4015	20.1347	15.7964	23.2213	24.4565	27.3127	30.4124	23.9679	28.0568	22.148
ENSSSCG00000009430	AKAP11	13.7501	7.53124	25.581	13.1115	16.8777	17.7199	9.75131	7.2975	16.936	17.6499	19.5815	25.1794	8.71321	11.2118	11.7778
ENSSSCG00000031733	AKAP12	1.42881	0.38403	0.0531431	0.00916371	1.45202	0.680861	0.514897	0.308321	2.65085	2.75299	1.30894	0.88191	0.138561	0.0425816	1.8179
ENSSSCG00000032986	AKAP17A	122.502	33.2033	219.857	54.9194	83.1426	137.868	66.1482	42.5656	61.444	110.453	98.9036	211.439	28.7345	49.7174	51.3958
ENSSSCG00000000720	AKAP3	2.06494	3.50106	3.14445	2.61546	3.74921	3.27981	3.42168	3.47691	3.2178	3.49134	5.82181	5.58633	1.59081	1.89598	3.18034
ENSSSCG00000002268	AKAP5	2.27956	1.30552	7.30355	3.26847	0.893118	0.651697	2.18014	0.626035	1.47641	1.23933	5.51093	4.26648	0.339657	0.324813	19.9554
ENSSSCG00000024517	AKAP6	0.468332	0.282547	0.881407	0.532653	0.675793	0.469738	0.550012	0.580987	0.273987	0.305691	0.234737	0.324379	0.595724	0.715308	0.841019
ENSSSCG00000036790	AKAP7	10.7704	21.4712	13.9733	17.9025	55.4006	51.0699	53.5034	80.8333	21.6704	23.4009	32.2217	33.4825	19.6866	21.6479	11.5934
ENSSSCG00000013837	AKAP8	40.2907	14.8584	39.7009	19.4926	43.8593	55.1867	31.0167	24.6525	32.8635	51.8935	41.5983	64.9423	15.8736	25.3026	28.2049
ENSSSCG00000013838	AKAP8L	32.5305	24.848	28.9602	18.6523	27.9682	22.964	26.602	18.7669	26.5117	22.4095	46.1879	35.8024	30.5236	33.0409	36.8799
ENSSSCG00000015310	AKAP9	10.8169	2.44819	15.6254	6.5321	15.2795	17.0481	7.14433	4.72626	11.0918	19.5143	17.114	29.492	6.31915	9.41488	18.8286
ENSSSCG00000033335	AKIP1	3.60033	9.19067	3.47502	6.27833	7.18873	8.52911	7.62553	12.589	6.15122	7.27679	5.13981	5.36436	4.24085	4.48483	5.98812
ENSSSCG00000003652	AKIRIN1	77.6965	45.4517	59.0502	69.7194	69.0011	58.3116	45.7926	53.2637	78.5308	67.9551	67.0169	62.5286	64.3363	62.4837	68.5471
ENSSSCG00000023894	AKNA	48.7316	37.434	49.949	25.8621	98.6769	76.4502	86.4467	65.4815	99.5465	69.648	80.7015	75.2287	22.7804	24.069	77.2731
ENSSSCG00000029256	AKR1A1	30.7552	54.721	25.2496	41.5501	34.0576	25.5477	37.9228	38.5784	37.7456	23.5746	54.3417	34.0153	94.2509	88.0658	32.6055
ENSSSCG00000040608	AKR1B1	10.7073	12.3625	6.22854	8.17275	10.5423	8.8285	7.67211	9.49631	12.5667	9.82818	9.73294	8.22004	4.57315	6.00409	9.59105
ENSSSCG00000003491	AKR7A2	15.5985	20.1156	13.7459	26.5748	20.2816	16.4929	24.5488	27.4876	13.4412	11.1322	12.8623	7.96528	236.127	224.813	19.0479
ENSSSCG00000039139	AKT1	154.524	94.1236	160.065	79.8785	107.547	94.9851	110.364	74.1255	148.565	121.778	207.057	197.874	144.614	157.012	294.918
ENSSSCG00000003194	AKT1S1	16.535	10.9669	17.5955	12.2475	17.9018	18.717	17.0449	13.8651	12.4755	13.2514	16.4149	14.6639	16.6583	18.29	9.62075
ENSSSCG00000002989	AKT2	78.3613	47.4744	57.2076	37.0864	52.6294	46.2134	66.2013	45.6541	58.7076	46.4392	53.384	45.4375	35.3225	29.1187	62.2509
ENSSSCG00000010872	AKT3	11.3024	7.76205	12.67	8.48665	7.30367	7.56608	5.94533	5.37685	7.52712	8.93988	11.0328	12.1796	14.683	16.3582	7.57235
ENSSSCG00000026181	AKTIP	10.1091	15.6145	10.8213	9.03954	19.9602	24.6073	13.6708	16.2537	14.3253	23.4347	23.3763	32.7857	4.91672	6.31915	8.82026
ENSSSCG00000032787	ALAD	10.1769	28.2847	5.71834	12.9021	14.4549	14.7561	16.929	19.9751	11.7615	10.8561	42.8688	30.9527	12.8912	10.8635	17.5225
ENSSSCG00000011437	ALAS1	13.9819	16.682	12.141	15.2393	16.5928	13.3661	17.7048	15.8428	18.3321	13.9249	16.0542	15.1583	16.257	14.9015	13.1105
ENSSSCG00000012347	ALAS2	71.0512	23.4807	4.15387	5.25461	0.450084	0.843903	0.0593002	0.329501	0.876484	0.133072	0.0405402	0.00498369	2.14405	0.0621053	8.15786
ENSSSCG00000011946	ALCAM	15.6526	6.50818	27.0078	16.5609	1.27508	0.714209	3.65538	1.58713	4.14598	3.41101	3.88741	1.67884	35.6838	33.0579	2.10617
ENSSSCG00000003168	ALDH16A1	45.5859	40.6602	36.7776	37.414	43.2831	38.3608	41.1943	37.3718	46.2032	37.9413	56.618	51.7239	17.1452	15.5098	37.9961
ENSSSCG00000010495	ALDH18A1	15.9817	16.5775	10.254	18.3265	18.3176	11.4979	16.9179	16.7698	20.8273	13.3546	15.6335	8.41791	9.63618	6.86914	14.6474
ENSSSCG00000005361	ALDH1B1	2.32424	4.10401	0.583682	2.17411	8.14175	3.89368	8.17965	7.84344	9.99903	5.04951	5.93404	2.80662	6.55591	3.58502	14.224
ENSSSCG00000000839	ALDH1L2	2.29565	2.10333	3.16358	1.98428	0.144413	0.214963	0.0803295	0.0582361	0.343619	0.558838	0.116306	0.262649	22.5872	36.6422	8.12799
ENSSSCG00000009889	ALDH2	14.0663	48.9453	4.0049	10.4868	29.4408	31.5878	16.9231	26.8306	21.4359	13.6213	76.2005	60.2503	126.605	116.972	16.6176
ENSSSCG00000009889	ALDH2	14.0663	48.9453	4.0049	10.4868	29.4408	31.5878	16.9231	26.8306	21.4359	13.6213	76.2005	60.2503	126.605	116.972	16.6176
ENSSSCG00000018041	ALDH3A2	10.3116	12.6826	11.0829	9.54363	15.0066	10.834	20.4615	14.1979	26.4921	27.3348	17.5412	16.5772	27.7272	25.9361	15.8962
ENSSSCG00000024752	ALDH4A1	12.1926	19.1428	10.6171	14.0143	23.0035	18.5627	17.8252	18.7208	28.8438	17.9146	20.3975	15.2214	34.8426	34.2208	20.3232
ENSSSCG00000001090	ALDH5A1	1.22274	6.05068	4.12449	4.4197	4.50321	4.03365	4.35099	4.37834	3.02488	3.99016	4.6902	3.267	0.578704	0.557338	1.5795
ENSSSCG00000002357	ALDH6A1	4.58025	3.65486	3.53147	4.75969	4.95958	3.15953	3.71098	2.92065	4.31748	2.33275	5.3289	2.84951	3.29426	1.96309	5.54454
ENSSSCG00000014247	ALDH7A1	6.86202	10.429	7.19538	9.18117	9.9457	7.85747	7.36495	10.1984	8.56597	8.18477	9.37383	7.24184	22.6635	25.2071	5.50853
ENSSSCG00000017759	ALDOC	9.18157	46.8709	10.984	16.959	24.8952	19.5612	36.0258	37.4094	24.0251	18.2815	85.7275	39.0627	3.92993	2.53019	26.2179
ENSSSCG00000009381	ALG11	8.43803	4.53407	8.53861	6.4811	9.02413	8.6086	7.00406	5.89731	7.4477	8.25212	11.648	10.9414	6.89135	6.41396	9.49794
ENSSSCG00000000980	ALG12	9.76013	10.7344	10.5337	7.24986	16.4218	22.5487	14.6875	11.6603	15.6757	15.9183	17.2366	25.307	5.91643	5.98104	9.54418
ENSSSCG00000006885	ALG14	6.35867	12.963	4.7303	14.5969	4.82728	5.43355	4.54394	6.08029	5.48909	5.25655	5.3729	4.5579	6.92975	5.8251	5.131
ENSSSCG00000005383	ALG2	7.17288	13.0733	5.41518	12.744	9.95948	4.74758	9.55713	7.93793	10.9434	8.14326	10.4915	6.45011	15.6623	8.46133	10.4459
ENSSSCG00000021319	ALG3	6.36777	6.72719	4.61842	5.9808	8.15579	6.16052	7.80637	5.55814	7.27395	5.41262	6.71083	4.66489	8.62482	7.73907	5.24613
ENSSSCG00000009360	ALG5	28.6673	46.2364	21.0289	53.0395	24.4628	34.5364	28.5054	40.9046	27.1848	39.0775	26.5608	25.2998	42.5918	55.3965	32.2576
ENSSSCG00000003815	ALG6	8.30523	7.43837	6.44107	9.82922	6.34718	8.84912	5.53339	5.83983	8.6398	7.23985	7.49112	10.0147	6.32145	2.95021	6.60358
ENSSSCG00000014887	ALG8	20.4943	11.3733	16.4461	21.6385	22.9874	23.9369	19.2517	18.1869	20.3275	20.9226	16.8126	14.9223	20.4674	19.1133	25.6025
ENSSSCG00000025906	ALKBH1	7.60387	7.78479	11.5306	11.7084	9.34864	11.2546	7.43364	9.38047	8.78548	12.5479	9.91146	17.6653	5.88993	7.3751	7.07578
ENSSSCG00000009940	ALKBH2	1.3152	2.49391	1.66776	3.25524	2.24144	1.65116	2.16386	2.65373	1.58329	1.49029	1.76925	1.77995	1.01182	0.833157	1.06892
ENSSSCG00000029300	ALKBH4	1.86361	4.055	2.47062	3.46103	3.40488	2.48126	3.15734	3.48238	4.19585	1.84745	3.10128	2.57056	2.39683	2.58568	3.35277
ENSSSCG00000035120	ALKBH5	13.2636	13.7441	9.91714	12.2577	19.3615	13.6713	22.7935	18.7364	22.5527	12.5303	22.8635	12.9215	16.5817	11.1158	17.9028
ENSSSCG00000002910	ALKBH6	27.0371	29.3723	28.4832	23.9462	29.9456	30.3802	26.6219	29.8307	24.913	18.5674	23.4749	27.2867	21.3727	27.8185	17.8261
ENSSSCG00000024254	ALKBH7	3.1447	11.9328	3.69407	9.733	4.16998	4.80539	4.80588	11.4191	3.86271	4.49113	4.36204	4.41383	6.9429	6.30634	4.59574
ENSSSCG00000024628	ALKBH8	7.87638	8.58924	8.12563	9.07218	9.61883	10.0231	8.86046	8.72287	8.97498	8.74661	10.5083	10.7109	7.22054	7.54395	8.61837
ENSSSCG00000037977	ALMS1	2.51019	1.14614	3.02594	1.79021	4.98303	4.58432	2.86233	2.00353	5.43725	6.11075	5.39733	5.35947	2.07615	2.75361	6.4797
ENSSSCG00000017923	ALOX15	7.78717	5.51176	7.84639	4.39954	0.0802456	0.138735	0.230887	0.319675	0.173168	0.284627	0.186762	0.291802	0.125052	0.289499	0.414113
ENSSSCG00000010404	ALOX5	0.588828	0.0486409	0.020359	0.0765513	0.0255956	0.116707	0.0113479	0.0247195	0.018703	0.00247515	0.255902	0.325798	12.9906	14.3261	0.142207
ENSSSCG00000009330	ALOX5AP	25.5472	51.1754	18.7901	31.6609	7.49369	10.4316	12.9605	10.5824	7.68135	6.67085	90.1784	54.6571	358.726	213.25	7.62638
ENSSSCG00000031348	ALPK1	3.23251	0.942906	5.51537	2.21632	3.25894	1.48674	0.48795	0.00422539	3.61953	1.95297	0.539794	0.296538	14.745	15.2299	0.793001
ENSSSCG00000004918	ALPK2	4.47017	1.32467	8.12807	2.95263	11.1039	9.10555	4.79604	4.90456	10.0467	8.29622	0.479267	0.671044	0.189759	0.275922	0.308839
ENSSSCG00000032607	ALPL	3.22869	0.101426	0.148675	0.00916371	0.00387933	0.0279901	0.0834193	0.106246	0.205801	0.00247515	0.0011845	0.00498369	0.00154798	0.0023305	4.06361
ENSSSCG00000016109	ALS2	2.57641	1.039	5.80705	2.53964	3.50114	4.50766	2.92981	2.06944	2.80192	4.12029	5.23615	6.93514	2.04813	3.44716	2.36315
ENSSSCG00000032655	ALYREF	136.513	125.175	100.367	108.111	118.429	96.4205	143.883	109.384	137.352	132.66	129.532	92.1619	85.1254	74.8808	182.706
ENSSSCG00000008937	AMBN	6.16158	10.5777	7.18642	18.1823	0.00387933	0.00100702	0.0640135	0.0980229	0.0299477	0.0880294	0.0011845	0.00498369	13.249	13.2418	1.0328
ENSSSCG00000013262	AMBRA1	7.04649	8.16768	6.85315	5.269	13.0626	11.1945	10.1409	10.0864	13.0019	11.1519	13.1074	11.1876	12.4646	10.3796	10.966
ENSSSCG00000004392	AMD1	67.6667	39.9183	60.0666	53.835	59.3497	63.2265	34.5605	37.4219	57.776	68.1703	47.031	69.5818	30.4423	35.2062	49.0558
ENSSSCG00000012361	AMER1	3.11887	2.0761	3.64311	2.08662	6.09884	4.01079	6.25903	4.00011	5.95202	4.02851	7.69196	5.53174	2.17628	1.75798	7.22254
ENSSSCG00000002822	AMFR	17.2121	22.0663	19.5646	16.21	36.334	32.4177	27.3672	20.6115	37.6951	32.8089	44.5877	37.8496	23.2861	19.7731	36.2756
ENSSSCG00000034883	AMIGO1	0.517458	0.620388	0.607742	0.43829	2.84313	1.96809	2.28681	2.1815	1.23032	1.04631	1.82822	1.44669	0.16385	0.113853	1.44847
ENSSSCG00000000810	AMIGO2	5.67562	3.95825	6.82967	6.55072	26.8453	30.9452	9.01655	12.5159	12.1273	18.3215	1.3699	5.8057	9.10731	10.9334	3.31518
ENSSSCG00000011389	AMIGO3	13.4969	16.9565	11.3092	12.5679	6.21778	5.74057	6.0702	5.22623	8.53543	7.65367	10.3622	10.6449	12.7591	12.0905	10.8793
ENSSSCG00000037591	AMMECR1	4.19302	2.36076	4.51378	4.79196	5.02411	3.90417	3.90932	4.26793	5.1867	4.50138	4.21073	3.64651	7.17469	5.45917	5.73578
ENSSSCG00000028633	AMMECR1L	12.2451	10.728	11.8775	11.5153	13.9742	13.1962	11.518	12.06	15.078	14.8429	16.258	16.7327	14.0037	11.5341	12.6613
ENSSSCG00000034407	AMN1	5.70126	10.2911	4.82119	8.39133	5.14709	3.97078	4.05204	6.2079	5.25855	3.89023	6.25409	6.64558	8.49111	6.60815	6.97046
ENSSSCG00000012591	AMOT	0.0406582	0.117731	0.253247	0.139169	0.132437	0.0297236	0.039892	0.0192496	0.0477383	0.00247515	0.213917	0.122343	0.905626	1.21245	0.10342
ENSSSCG00000014960	AMOTL1	0.0465397	0.13082	0.0792431	0.0819379	0.0379352	0.0652968	0.041433	0.0184066	0.106177	0.11956	1.08734	0.938818	0.0293691	0.0023305	0.0442707
ENSSSCG00000031125	AMPD2	15.4811	11.1728	17.0689	12.4162	23.5961	25.8745	21.4574	19.7684	18.589	17.8222	23.1473	23.8903	18.6766	30.3045	11.2525
ENSSSCG00000022492	AMPD3	35.0096	9.82959	16.0967	12.4469	0.157609	0.230022	0.184486	0.306151	0.0492099	0.154212	0.0661369	0.114601	24.139	15.9763	3.60221
ENSSSCG00000024136	AMPH	0.203737	0.0591951	0.00331914	0.00916371	0.00387933	0.00864058	1.41844	1.19248	0.00170735	0.00247515	0.0592312	0.178078	0.00154798	0.0023305	85.2561
ENSSSCG00000017264	AMZ2	22.2954	38.4291	41.2499	32.148	44.0322	59.211	55.7478	52.3336	43.4765	64.3999	76.8919	106.698	26.3256	30.1217	79.9864
ENSSSCG00000008105	ANAPC1	15.2236	10.5104	18.8157	11.5733	22.362	20.0032	14.0388	11.2326	22.8806	23.3422	30.3066	34.7007	9.89976	10.0329	16.3344
ENSSSCG00000033057	ANAPC13	76.4671	126.557	54.1394	140.149	73.9738	90.5035	79.81	100.633	90.622	106.727	72.2173	57.7176	82.2673	64.8443	95.5686
ENSSSCG00000014806	ANAPC15	38.2367	29.1046	27.2785	23.4875	25.11	26.4458	27.591	24.099	19.2265	23.7227	26.401	28.0933	27.946	30.0892	27.535
ENSSSCG00000037728	ANAPC16	51.9798	107.433	61.1502	118.612	48.8979	57.4245	58.8	91.6752	47.2133	59.9777	57.6312	45.2093	63.8774	64.6527	70.2501
ENSSSCG00000032828	ANAPC2	13.3821	12.7248	14.7628	10.2181	16.0072	13.6151	16.4387	13.5132	13.055	11.8706	16.3203	14.3107	9.45084	9.18357	14.0753
ENSSSCG00000025902	ANAPC4	14.7602	7.96989	17.6637	14.8685	13.0152	16.1413	12.2808	10.5453	12.8534	18.7105	13.9601	18.1036	9.91513	11.0403	13.9048
ENSSSCG00000009814	ANAPC5	18.7234	18.909	20.4411	23.5388	26.5718	22.1879	24.8949	25.1629	22.6293	20.8745	27.4747	24.9144	10.6018	10.202	22.965
ENSSSCG00000030222	ANAPC7	22.7501	22.6036	18.2939	21.9844	40.0715	34.8657	28.526	29.3112	28.1811	30.8376	22.1387	17.9685	18.5746	16.4593	22.9726
ENSSSCG00000002390	ANGEL1	4.09718	6.11324	7.03332	8.08418	3.84808	2.62493	1.72226	2.27293	1.92252	2.27828	2.35633	1.38318	5.36041	5.52113	0.994262
ENSSSCG00000015588	ANGEL2	69.0234	44.3265	70.3995	46.0079	72.2614	93.9367	47.2071	49.0325	57.1391	88.8183	82.64	144.89	31.3941	41.0149	55.2407
ENSSSCG00000015753	ANGPT2	2.82949	6.92553	1.23437	3.48052	13.6009	12.646	9.84947	11.9506	1.73348	1.95735	0.605027	0.407915	0.0571088	0.0226459	0.424866
ENSSSCG00000005608	ANGPTL2	0.0088995	0.0117741	0.04296	0.00916371	0.00387933	0.0220292	0.108703	0.0328507	0.00170735	0.00247515	0.0483888	0.00498369	0.0137721	0.0023305	4.11574
ENSSSCG00000013599	ANGPTL4	30.3179	31.8363	73.4936	66.3025	1.03042	2.11323	1.01451	1.04122	0.551284	1.11731	2.15117	3.08863	0.243736	0.336498	2.7098
ENSSSCG00000017877	ANKFY1	5.44678	4.95366	6.33164	4.50071	8.41274	9.00228	7.62746	5.75257	9.37772	7.88468	10.8541	8.87456	8.02264	10.8803	7.63785
ENSSSCG00000016784	ANKH	0.939519	3.25029	2.16769	1.56428	10.1712	6.83434	2.45439	2.47476	10.7242	5.87832	4.82981	4.06755	4.04795	6.44949	1.07994
ENSSSCG00000014364	ANKHD1	14.7718	6.37432	16.1246	8.9625	19.366	18.9855	13.4644	14.7068	21.0228	20.0571	25.847	25.7326	13.4295	14.0241	18.6833
ENSSSCG00000014364	ANKHD1	14.7718	6.37432	16.1246	8.9625	19.366	18.9855	13.4644	14.7068	21.0228	20.0571	25.847	25.7326	13.4295	14.0241	18.6833
ENSSSCG00000015314	ANKIB1	8.21054	5.46327	10.7602	6.03384	11.4118	12.3913	7.74784	6.18346	13.2439	18.8951	12.7233	19.6291	7.78787	7.36992	10.1711
ENSSSCG00000026781	ANKLE2	14.964	11.5935	12.4032	11.0415	19.1024	13.2437	15.245	13.3433	20.6114	12.5962	18.6842	13.1038	15.3222	11.8248	23.8284
ENSSSCG00000015360	ANKMY2	23.8505	26.4696	12.8128	19.8612	24.9043	19.5123	16.486	22.4225	33.7937	27.763	28.9397	18.9551	34.1736	20.1652	42.8682
ENSSSCG00000014070	ANKRA2	14.4554	19.5615	19.7832	22.0674	23.9034	29.4408	17.0888	22.2004	20.2752	30.7803	24.2296	28.3743	22.206	30.0257	18.255
ENSSSCG00000033732	ANKRD10	138.664	61.2604	164.152	101.229	177.906	170.002	144.546	102.28	147.978	151.742	142.939	153.762	73.7408	75.7688	143.546
ENSSSCG00000039541	ANKRD11	17.0265	8.45109	21.1609	6.30547	22.9559	25.2678	15.8471	13.3227	23.3607	27.0074	27.5323	40.3519	17.3507	27.9146	16.411
ENSSSCG00000003682	ANKRD12	35.4165	7.30785	33.9172	16.953	40.3002	33.3683	21.6914	14.2483	37.484	45.5541	36.5333	42.271	24.6466	32.3969	26.6525
ENSSSCG00000009924	ANKRD13A	92.4576	46.4536	94.3785	45.1894	96.317	95.977	85.8611	67.2069	85.2349	90.9818	110.203	123.278	110.96	125.993	96.4351
ENSSSCG00000003790	ANKRD13C	5.66317	5.92641	7.39687	9.83437	8.83757	8.61582	5.56559	5.19635	7.00317	11.3508	6.26387	10.5351	6.85816	9.21864	6.79313
ENSSSCG00000012917	ANKRD13D	2.87577	2.09439	3.22548	1.67581	3.36003	3.93275	3.51122	3.76805	3.8859	4.68603	5.341	9.28875	7.7928	9.53951	6.97548
ENSSSCG00000028790	ANKRD16	5.02477	6.82675	5.37919	5.54271	5.85703	5.55054	7.58896	5.51301	5.76551	6.19783	8.41211	9.05314	6.61339	9.33135	4.40139
ENSSSCG00000024592	ANKRD17	11.0703	5.84334	15.7236	7.63666	17.4599	16.8661	9.13716	8.93961	17.8271	16.8956	21.232	24.596	11.8589	16.0462	15.4038
ENSSSCG00000010445	ANKRD22	0.177239	0.469019	0.00331914	0.109657	0.00387933	0.00100702	0.00132549	0.00422539	0.00170735	0.00247515	0.0011845	0.00498369	6.79446	3.98862	0.00079626
ENSSSCG00000013497	ANKRD24	1.00904	0.238357	1.62384	0.996475	0.65808	0.730336	0.389553	0.232854	0.16259	0.4841	0.378753	0.605709	0.131056	0.281658	0.262431
ENSSSCG00000002859	ANKRD27	23.5437	22.1423	23.021	13.4965	32.8622	35.5604	23.1406	18.829	41.4351	51.5235	90.9312	111.305	17.2738	20.1156	24.4288
ENSSSCG00000011194	ANKRD28	7.42661	3.47002	6.86787	4.6595	5.72494	6.10594	3.90472	3.2564	3.72431	5.15042	7.83738	10.9834	16.068	20.4209	4.76133
ENSSSCG00000003708	ANKRD29	0.585529	2.18201	0.00331914	0.00916371	2.83121	2.35296	3.16986	5.38105	1.20496	1.64354	2.55818	2.08265	4.07931	3.76576	2.00642
ENSSSCG00000039609	ANKRD33B	7.60732	4.6894	7.04098	6.15127	4.23515	4.50321	1.54539	1.63809	6.29729	7.09879	6.1587	7.32006	1.82479	2.43854	1.29795
ENSSSCG00000006688	ANKRD35	1.49453	0.118883	0.3239	0.186904	0.117588	0.1425	0.153545	0.122336	0.204603	0.162933	0.235506	0.29941	0.217007	0.208248	1.23893
ENSSSCG00000015798	ANKRD37	5.60879	16.9655	8.92276	13.0402	8.96288	13.216	8.9944	12.3513	7.36452	11.6399	14.542	19.2121	16.2847	18.2067	8.3721
ENSSSCG00000035533	ANKRD39	8.85453	25.7366	8.72648	18.822	12.2011	20.642	16.0933	26.3668	9.90716	10.3341	9.7599	12.0501	12.2624	12.6138	15.77
ENSSSCG00000038760	ANKRD40	9.49414	7.02588	9.42703	7.11898	9.81499	7.77837	8.82976	7.74784	11.357	9.19442	14.4154	13.2959	14.2751	12.9717	9.42046
ENSSSCG00000014902	ANKRD42	3.08976	5.0067	4.09302	5.40276	3.87243	2.6298	5.25073	4.12106	4.06529	4.45102	2.95863	2.73964	3.86384	3.07658	3.63935
ENSSSCG00000016074	ANKRD44	37.0033	19.1475	33.3157	22.5971	44.0195	36.9964	19.7482	15.5507	58.8119	45.85	59.3546	62.1551	21.1771	16.437	26.0798
ENSSSCG00000006065	ANKRD46	4.23966	4.36028	3.91606	4.07635	7.25103	7.17839	5.5298	7.17266	4.57109	5.48909	7.2577	7.03229	3.3031	3.53489	8.29866
ENSSSCG00000014956	ANKRD49	16.6095	16.2782	16.429	16.5653	16.8558	14.2063	15.4795	15.7226	19.1896	17.4125	17.6653	15.9737	26.4473	23.6292	19.0139
ENSSSCG00000022173	ANKRD50	0.376621	0.119049	0.0668538	0.0374558	0.240705	0.165834	0.111065	0.0932121	0.111469	0.0370281	1.55867	1.68965	0.904368	0.83112	0.425016
ENSSSCG00000000386	ANKRD52	8.60624	4.56261	9.86442	5.48791	7.43569	8.45907	6.32734	4.94829	9.18932	9.12127	8.74872	11.7967	4.53551	5.33389	6.6403
ENSSSCG00000000120	ANKRD54	5.647	6.63952	5.66732	6.23019	6.06199	4.84898	6.96116	5.01406	5.63183	4.04536	6.24434	4.70771	5.716	7.46203	7.45787
ENSSSCG00000016917	ANKRD55	0.342349	0.150304	3.46775	1.25921	0.587804	0.309561	0.00132549	0.0577528	0.949983	0.709752	0.0411847	0.0819241	0.00154798	0.0538439	0.0344873
ENSSSCG00000004322	ANKRD6	0.0668217	0.390859	0.12846	0.0853121	0.22097	0.217927	0.0510226	0.126911	0.235143	0.018703	1.61544	2.14909	0.100695	0.0781745	0.0268572
ENSSSCG00000007593	ANKRD61	0.75348	5.32117	2.35025	2.41803	1.92314	1.15614	2.05238	1.81077	1.48822	1.78908	1.85306	1.30619	1.13188	0.993722	0.971181
ENSSSCG00000001534	ANKS1A	4.61514	1.56382	5.58177	3.93386	5.33718	4.78616	4.32629	2.3448	4.94305	4.52501	4.6046	4.11506	8.24032	7.41906	7.09349
ENSSSCG00000007939	ANKS3	8.1318	1.68232	5.93831	3.17981	3.50985	6.19889	1.39281	0.995705	2.34783	5.59151	1.0915	1.63308	3.40185	7.05193	3.86761
ENSSSCG00000005378	ANKS6	0.080014	0.181153	0.00331914	0.0549297	0.737263	0.257052	0.240114	0.176787	0.163411	0.109244	1.08145	2.17117	0.0765332	0.0871592	0.299372
ENSSSCG00000016212	ANKZF1	17.5069	9.50473	20.6898	11.7604	18.3812	21.6584	15.1686	12.963	12.6776	16.5005	19.3868	24.0473	13.8531	13.8394	12.2439
ENSSSCG00000016658	ANLN	1.77085	0.807104	1.16601	2.41545	0.633612	0.288667	0.644609	0.185282	1.706	1.35138	0.557815	0.861627	1.39812	1.63901	5.55324
ENSSSCG00000011296	ANO10	0.64471	1.77691	1.27503	2.42647	0.706109	0.642698	0.349713	1.67932	1.0454	2.03313	3.18082	2.52595	77.8682	69.4416	0.518663
ENSSSCG00000000804	ANO6	4.1644	6.49002	6.29209	4.62997	5.79573	7.38336	2.99318	3.60542	9.60061	8.86259	11.0271	14.8593	27.6491	30.7299	10.779
ENSSSCG00000039330	ANO8	6.82965	4.46006	7.58696	3.52225	6.92963	11.2863	6.59489	7.55955	8.28029	11.8743	9.93542	17.0997	11.3876	20.837	5.58875
ENSSSCG00000024569	ANO9	7.09847	8.80244	18.6227	7.89206	14.813	18.9713	22.0765	14.8631	13.5733	21.9139	44.9388	64.3669	0.46099	0.296553	9.44792
ENSSSCG00000001849	ANPEP	13.7696	7.11068	0.116549	0.198038	0.059424	0.0467942	0.139971	0.00422539	0.0744752	0.0566702	0.0188843	0.00498369	6.92443	1.48047	0.0476413
ENSSSCG00000008004	ANTKMT	2.87091	14.1633	3.39614	7.98173	4.69457	6.07512	5.4728	12.1977	4.2932	4.97465	4.56033	4.94076	4.12044	3.82768	4.36946
ENSSSCG00000009256	ANTXR2	8.45109	19.2263	1.39184	0.748962	25.4518	17.999	14.0734	9.45765	23.2791	17.9611	84.0881	47.5096	90.6267	88.6084	9.29895
ENSSSCG00000005267	ANXA1	31.7888	488.949	4.14595	10.179	71.1273	61.7966	41.5536	52.5349	122.202	119.83	897.698	717.084	1340.5	1611.38	17.5573
ENSSSCG00000010331	ANXA11	97.8225	79.2281	84.4933	66.6856	102.07	76.9353	108.441	77.6847	140.523	112.648	142.05	105.246	184.791	153.186	125.446
ENSSSCG00000004578	ANXA2	204.311	217.68	88.7718	152.526	178.778	126.815	147.227	97.1172	490.079	367.213	134.634	70.8452	1154.9	939.84	210.494
ENSSSCG00000008336	ANXA4	15.5532	27.0244	1.99696	5.91304	0.492266	0.673656	0.312295	0.612942	0.0530937	0.653615	0.351527	0.33428	101.549	92.6999	0.530193
ENSSSCG00000009097	ANXA5	21.8608	53.1789	7.53082	29.6629	6.04711	8.77587	20.6853	22.5926	17.5074	29.8728	78.8268	29.1759	532.585	513.758	71.2917
ENSSSCG00000017089	ANXA6	283.418	222.525	251.646	224.658	288.754	158.478	209.425	157.663	325.361	162.574	389.92	196.991	54.3793	45.3626	207.551
ENSSSCG00000010299	ANXA7	52.602	78.1803	49.8398	66.7958	74.3344	53.8992	71.0643	69.2039	80.5755	71.5573	89.6775	68.321	133.464	104.292	70.8419
ENSSSCG00000006643	ANXA9	4.45578	0.466971	3.08934	1.62504	0.557693	1.36255	0.89191	0.120753	0.522218	1.54687	1.04712	1.89484	1.3719	3.26166	0.701664
ENSSSCG00000016657	AOAH	29.1548	19.5748	7.72494	12.6467	9.54824	6.71205	97.1172	58.2216	46.4541	26.6855	31.4865	9.30233	50.748	41.4457	384.943
ENSSSCG00000016442	AOC1	0.124172	1.18369	0.0964483	0.0527302	0.098484	0.0452483	0.033256	0.106452	0.0911175	0.245478	7.07369	8.02951	0.034204	0.143241	0.033576
ENSSSCG00000010943	AOPEP	1.29572	2.82332	2.36716	2.20129	5.61861	4.56841	2.99116	2.64928	2.66454	2.56664	3.50021	3.51084	1.92948	1.57636	3.49516
ENSSSCG00000009128	AP1AR	33.6959	24.6765	27.3047	29.5378	55.715	46.3202	43.425	43.2782	61.1492	73.481	33.9212	31.6474	22.0606	21.4739	56.3412
ENSSSCG00000009978	AP1B1	28.5438	22.6634	24.5003	21.488	20.0965	14.3994	20.1644	14.5391	25.8472	15.8447	21.941	16.406	47.8895	41.7184	27.6964
ENSSSCG00000002740	AP1G1	19.7027	16.0551	16.8662	17.1186	19.4912	16.6454	15.9794	12.3014	23.8969	17.0197	24.586	21.7165	23.4166	18.5429	30.9253
ENSSSCG00000002015	AP1G2	31.7244	16.7935	41.9907	21.6228	18.5456	22.5912	23.0072	17.52	21.918	25.9577	35.9494	45.5186	16.839	22.3292	16.7157
ENSSSCG00000013856	AP1M1	75.65	54.7017	58.9268	47.1762	40.109	28.5549	33.4748	31.6684	56.3404	31.8806	44.952	34.7961	41.8894	35.0884	64.0157
ENSSSCG00000021145	AP1S1	25.3723	55.4948	21.3161	46.2826	27.709	28.8594	31.0519	42.9866	33.604	31.5203	25.828	18.7742	30.2186	24.6101	36.1012
ENSSSCG00000036074	AP1S2	30.4798	35.9485	31.3521	58.5145	12.0019	11.9058	11.1645	19.6332	24.6594	29.9204	25.7723	24.2944	63.7831	63.4912	40.8806
ENSSSCG00000040847	AP1S3	19.632	18.8849	30.8194	48.4045	5.60296	8.28867	4.61315	9.80361	6.39796	7.72301	2.06389	2.36906	29.5331	39.7294	2.10917
ENSSSCG00000003199	AP2A1	27.6964	23.2878	20.5998	16.59	26.0994	22.4838	25.2231	20.1462	37.0113	25.3857	31.7446	25.5022	55.3557	44.0144	31.4528
ENSSSCG00000012836	AP2A2	16.1351	10.1662	16.7817	10.7602	15.8124	16.7924	16.2617	11.6798	17.1495	19.8362	20.6787	21.1476	41.5837	49.9849	24.1751
ENSSSCG00000017712	AP2B1	27.7176	30.5388	17.7658	26.9285	28.8487	17.2627	29.4928	26.5708	38.4232	21.9795	39.3229	19.004	30.8715	19.3714	39.6982
ENSSSCG00000024437	AP2M1	117.901	154.914	94.0002	105.254	147.453	117.215	109.588	124.758	170.045	131.003	147.684	130.627	318.797	271.889	149.575
ENSSSCG00000003106	AP2S1	101.198	120.163	69.4905	115.02	73.6934	65.883	88.392	77.8229	94.7946	80.6939	64.6502	48.1675	298.153	294.499	95.2225
ENSSSCG00000014101	AP3B1	25.075	21.1616	20.5735	23.6797	24.1	21.0069	23.1474	22.2958	33.3928	28.1811	33.2692	26.8313	62.7123	45.2099	41.0754
ENSSSCG00000040157	AP3D1	20.5366	11.0546	22.1281	11.8732	19.6064	20.5812	17.2835	12.4622	21.7228	19.9224	23.6359	26.6019	19.9955	24.865	21.8257
ENSSSCG00000010314	AP3M1	44.922	33.828	34.8056	41.8225	36.8021	39.7581	23.0851	33.3643	48.1856	38.0914	37.1479	33.6263	59.586	42.2223	40.1097
ENSSSCG00000007033	AP3M2	0.631192	0.347673	1.08706	1.0159	3.53018	2.39409	1.12995	0.900834	3.20331	2.30045	0.42251	0.417075	4.12215	3.62213	0.367046
ENSSSCG00000030174	AP3S2	22.8355	39.1796	20.9708	36.7056	25.6873	27.6882	28.3084	42.4769	25.0323	25.687	24.669	20.3605	37.4361	32.96	27.6763
ENSSSCG00000006762	AP4B1	9.46459	6.65619	8.14851	7.93005	9.46845	8.86794	7.33462	7.50613	7.48435	8.28268	9.51267	10.3089	6.73362	8.09539	9.61661
ENSSSCG00000004634	AP4E1	5.29321	3.19459	10.8518	5.80408	7.78773	11.3764	3.36294	3.18685	7.41559	13.6158	6.89281	20.7857	4.59786	8.60041	5.09579
ENSSSCG00000034288	AP4M1	11.8737	19.0898	15.1588	18.8286	9.09644	10.0985	9.8133	11.347	7.71479	10.285	14.068	14.445	17.6616	17.7622	9.36263
ENSSSCG00000012978	AP5B1	3.94649	5.56664	3.64725	4.4833	6.90179	2.46414	5.62869	5.67064	7.81217	2.74305	5.37588	1.75266	10.937	5.81991	7.59789
ENSSSCG00000005065	AP5M1	18.3542	19.0216	26.0275	28.4104	21.6525	28.6252	12.1646	21.9528	20.6742	34.1781	18.5524	34.0637	18.336	21.0531	19.5573
ENSSSCG00000007577	AP5Z1	25.4996	10.955	29.9471	10.984	23.9639	28.5642	25.4577	15.3057	31.0503	35.281	19.0728	29.0771	13.3983	19.2159	17.0781
ENSSSCG00000000884	APAF1	37.804	11.8892	43.0817	20.8672	43.2385	46.2275	28.0485	16.5661	39.9991	49.3036	59.963	90.7756	20.5996	25.4862	33.1654
ENSSSCG00000005250	APBA1	2.55962	0.903639	0.450041	0.326503	0.0182297	0.078841	0.0249045	0.0283525	0.114299	0.212685	0.104817	0.146185	13.1887	12.2542	0.142033
ENSSSCG00000013492	APBA3	9.10435	9.92253	8.04325	8.94276	12.0101	9.60969	10.5716	10.2727	12.7222	11.405	11.5891	12.5439	8.33527	8.33527	11.0741
ENSSSCG00000014628	APBB1	5.30547	7.14041	6.02664	2.4074	24.3262	27.5781	26.3443	23.5498	5.52001	10.6182	15.3417	15.6789	0.313946	0.152806	31.2492
ENSSSCG00000030156	APBB1IP	58.527	57.5077	43.3848	36.624	175.511	104.146	123.432	81.6076	223.636	134.345	116.62	69.3283	124.826	84.3166	199.902
ENSSSCG00000022168	APBB2	1.3995	3.10294	0.985184	2.42287	1.29521	1.08082	1.38668	1.17586	1.18493	0.849219	2.22027	1.9965	0.623749	0.179998	4.10467
ENSSSCG00000014366	APBB3	3.67774	0.810124	10.3258	0.545418	3.16105	8.85515	2.58508	1.99904	1.74449	4.19062	4.63964	15.7177	0.225226	0.579422	1.51222
ENSSSCG00000014207	APC	7.08777	1.93827	12.3445	4.51738	6.85818	8.18874	3.49908	2.67056	5.99032	9.25124	8.68025	14.434	9.99819	16.8152	5.47829
ENSSSCG00000039797	APCDD1	1.152	0.248652	0.0315036	0.00916371	0.414375	0.558486	0.0737627	0.00422539	0.0558424	0.00247515	0.621381	0.666414	4.83551	2.54871	0.495123
ENSSSCG00000011385	APEH	21.8838	24.6632	21.5832	23.5239	21.4199	24.1762	20.5922	22.7807	20.2529	20.727	22.7422	25.9952	23.032	19.265	19.8287
ENSSSCG00000040060	APEX1	28.2016	32.0345	21.2835	47.1932	24.8614	19.9083	26.041	36.0842	14.758	13.6504	18.0117	13.5179	13.8775	9.91513	20.21
ENSSSCG00000012348	APEX2	12.7341	19.087	9.54503	17.4573	12.2973	9.26145	12.0298	13.4044	16.5933	8.8208	10.8172	6.55473	10.7286	6.97067	17.8176
ENSSSCG00000028297	APH1A	80.1802	100.97	65.3255	83.0274	66.2292	69.0855	67.6478	74.4292	84.9583	65.2345	71.0521	60.8896	225.333	158.754	95.341
ENSSSCG00000032949	APH1B	5.6499	10.5373	11.6909	18.281	13.3966	10.8034	16.3972	18.8496	17.6418	13.2551	18.2707	10.0992	2.03148	1.92314	7.87547
ENSSSCG00000013285	API5	77.0968	92.2629	58.1535	94.0574	128.946	89.0546	91.1245	108.043	111.367	77.2158	84.411	46.1294	70.4362	51.6279	107.942
ENSSSCG00000013299	APIP	45.8163	81.3537	34.3319	66.2198	27.3051	28.366	29.1421	37.9573	30.5765	35.9148	61.3443	39.0416	43.3914	41.5199	32.9662
ENSSSCG00000008346	APLF	28.3134	29.6484	34.8359	34.2918	12.4703	10.416	12.0153	11.8276	8.08873	10.1966	15.3993	17.1958	26.0856	21.0962	10.472
ENSSSCG00000015244	APLP2	4.81534	5.96039	5.64249	5.04158	12.1927	5.4873	8.94839	6.42626	8.77229	3.83351	11.5098	4.56033	39.1503	23.2364	8.14208
ENSSSCG00000036286	APMAP	60.1326	83.5009	44.7112	63.8063	58.2577	50.526	76.5858	69.3068	64.8709	50.5525	85.6495	55.0498	55.7646	42.5105	71.9935
ENSSSCG00000000091	APOBEC3B	38.0527	52.602	45.3016	50.5955	66.6831	70.0836	63.8235	70.6719	66.742	80.6484	70.7941	75.5096	21.8806	25.4923	36.5331
ENSSSCG00000003088	APOE	0.255392	0.0117741	0.00331914	0.00916371	0.156599	0.161721	0.035911	0.20647	0.399375	0.314672	0.239963	0.107528	21.1712	22.5098	0.00079626
ENSSSCG00000001411	APOM	0.975821	0.399296	2.65866	1.05725	1.05751	0.719919	1.37079	1.29592	0.700938	0.22077	1.39819	1.04106	0.468694	1.16389	0.809113
ENSSSCG00000012174	APOO	14.6163	19.4022	11.1809	32.4567	8.2703	12.4973	12.6639	21.891	14.253	15.8639	11.8734	9.46772	16.4039	17.1698	23.3362
ENSSSCG00000012459	APOOL	15.8537	21.9877	14.082	24.9558	12.1333	14.6936	11.9831	20.0238	11.9417	11.2778	12.1825	12.1977	26.2029	26.4307	13.2377
ENSSSCG00000012022	APP	7.18945	21.3089	4.11259	4.39765	57.1954	30.812	13.5586	16.8952	34.6041	18.313	57.0867	30.0999	100.047	74.5782	2.9067
ENSSSCG00000017678	APPBP2	18.1033	12.6946	14.0726	17.4222	19.6291	16.5838	12.6045	13.2479	19.2841	16.437	21.118	20.4343	19.8988	16.9658	25.8218
ENSSSCG00000032357	APPL1	25.2982	22.8447	23.2152	24.4247	33.4299	26.0462	17.3154	19.8062	29.1269	27.357	29.6439	29.2558	37.8685	30.003	29.8965
ENSSSCG00000000841	APPL2	14.3843	10.0976	14.7494	9.37777	15.6581	26.2266	11.8629	14.9559	9.82145	21.2894	14.4101	39.6897	19.1619	20.663	12.1576
ENSSSCG00000002650	APRT	38.2573	52.74	20.6351	38.0796	39.3317	51.2353	46.9616	57.4116	48.7286	48.9285	31.3144	40.6442	41.248	36.9349	37.8976
ENSSSCG00000011001	APTX	7.43405	15.4952	7.6416	15.4612	6.14687	7.66722	8.777	14.0681	6.45048	5.95478	6.08559	5.44504	8.77579	11.8834	6.69569
ENSSSCG00000014880	AQP11	1.97978	9.81575	3.83753	10.5444	11.4719	8.18117	8.32111	13.9913	9.34917	5.85507	8.35509	6.29932	7.50435	5.23321	6.08746
ENSSSCG00000040513	AQP3	32.865	68.1614	7.93879	35.4913	16.1997	13.004	19.1128	25.0649	48.6474	35.7789	7.61559	3.16706	10.3361	3.05011	24.9408
ENSSSCG00000004597	AQP9	0	0.0117741	0.0235627	0.00916371	0.0200246	0.0310095	0.00132549	0.00422539	0.0101765	0.00247515	0.0011845	0.00498369	9.93801	7.71911	0.00079626
ENSSSCG00000004802	AQR	11.8344	9.015	18.2487	12.3252	15.7064	15.4936	11.117	8.60488	18.8191	17.6822	17.3545	20.5219	10.8232	10.242	17.1373
ENSSSCG00000012275	ARAF	47.9112	43.0939	54.4139	34.3445	49.158	51.1068	56.3759	48.337	53.9974	52.4045	64.751	67.8986	47.7304	50.2703	54.6853
ENSSSCG00000014817	ARAP1	40.7357	28.0399	32.1736	15.8185	30.9343	28.3967	31.5383	22.1751	41.7807	35.2889	46.6677	43.5054	81.832	89.0864	51.3499
ENSSSCG00000008768	ARAP2	5.11927	5.76635	11.0759	5.85505	36.702	36.1503	20.936	13.6351	32.2842	32.7983	31.5178	42.3946	0.412448	0.341193	47.9549
ENSSSCG00000014391	ARAP3	9.14788	4.18111	8.00556	3.93113	1.37785	2.63153	2.43779	1.02838	2.3456	3.27866	3.00984	4.74166	22.0364	19.6575	1.54137
ENSSSCG00000038965	ARC	0.19096	0.891025	2.12098	0.210359	0.157998	4.0873	0.0873547	0.275168	0.0490301	1.20412	0.140228	6.11297	0.00154798	0.608797	0.0203307
ENSSSCG00000030053	ARCN1	70.998	68.9807	47.88	65.3255	75.7637	59.5164	48.7974	59.6267	92.2781	69.274	87.2131	64.5474	117.783	93.2044	108.444
ENSSSCG00000008963	AREG	0.439659	0.863716	0.817042	1.15471	0.348737	0.529315	0.246372	0.0854076	0.315903	0.394888	1.72658	3.90519	0.653762	2.05511	0.0939756
ENSSSCG00000002370	AREL1	22.3632	15.0994	30.0745	18.3224	21.7239	18.5927	19.5532	15.9977	29.4634	22.3702	30.2476	27.8677	18.5304	18.0939	21.3487
ENSSSCG00000013992	ARF1	463.316	442.037	295.199	379.541	450.197	345.83	386.86	386.86	517.454	389.82	507.693	315.802	693.254	516.797	536.724
ENSSSCG00000031791	ARF4	62.8713	127.96	42.7015	121.173	66.7419	69.2202	67.7125	103.841	83.348	78.3958	67.8986	51.3735	86.2448	63.7502	110.929
ENSSSCG00000016593	ARF5	8.00215	24.3453	7.6074	20.5515	14.0108	16.9327	11.743	21.0341	13.0114	12.9781	10.0481	9.15543	13.1672	12.2905	14.5549
ENSSSCG00000005012	ARF6	347.061	339.209	302.515	328.033	228.836	159.554	209.83	175.741	340.25	222.846	398.68	265.556	224.813	214.44	314.438
ENSSSCG00000013245	ARFGAP2	48.094	32.2334	48.7159	33.9478	54.3457	58.0592	47.3203	37.491	49.3036	45.1001	57.7176	66.5522	30.1984	32.8828	50.807
ENSSSCG00000000037	ARFGAP3	34.4087	44.7498	24.675	25.7716	73.8645	56.952	78.9686	72.2059	71.3156	58.8983	99.3931	85.3376	67.4816	63.8774	56.5152
ENSSSCG00000006201	ARFGEF1	24.4623	12.2565	30.2817	15.2664	29.9883	31.9763	17.8213	16.6045	31.8806	33.1725	32.8966	41.4655	21.5755	22.7495	27.9401
ENSSSCG00000007460	ARFGEF2	9.23124	3.54853	10.215	4.79069	8.36275	9.20178	5.44973	3.98534	8.00916	8.72798	7.70882	10.0464	14.0736	14.5221	8.32777
ENSSSCG00000009010	ARFIP1	27.5701	46.3029	23.1713	47.3877	34.4216	27.6177	34.3991	40.9624	40.0717	26.9719	49.43	34.3255	44.549	33.5849	55.4571
ENSSSCG00000035304	ARFRP1	24.7245	23.53	29.6556	21.1534	29.4135	34.2649	32.5749	27.6285	28.7085	34.141	31.9235	36.9144	16.8037	20.3704	33.1258
ENSSSCG00000004195	ARG1	6.86586	2.43993	0.502704	0.819923	0.481702	0.580478	0.267352	0.0624589	1.04423	0.625703	0.0941856	0.00498369	0.458407	0.298854	1.41434
ENSSSCG00000002294	ARG2	0.745737	8.66125	0.150015	0.962425	9.52999	12.2085	2.57028	2.74208	9.72988	11.7574	6.28368	7.03935	5.75236	5.52447	1.4522
ENSSSCG00000009536	ARGLU1	195.162	52.1332	223.574	77.1424	187.024	187.931	122.233	65.9888	116.392	190.476	201.169	263.951	53.9608	69.1558	130.047
ENSSSCG00000013256	ARHGAP1	38.7448	33.0669	29.5905	24.3293	65.1088	46.4234	42.6269	35.9208	87.4495	48.2675	76.9669	46.8044	100.261	81.4192	38.8943
ENSSSCG00000009029	ARHGAP10	0.556212	0.900199	0.200514	0.153887	3.40189	2.53128	0.941865	0.936751	8.1026	5.79031	1.29703	0.887053	6.83253	9.60086	1.54832
ENSSSCG00000011026	ARHGAP12	4.32428	5.0324	5.93622	4.27986	10.0985	13.6009	9.45054	8.71675	9.55208	13.1309	12.5328	16.2098	5.9733	7.01677	10.282
ENSSSCG00000015671	ARHGAP15	137.492	98.9144	144.658	135.896	170.455	198.586	117.854	160.756	173.927	218.366	107.383	143.441	122.352	122.726	94.331
ENSSSCG00000031488	ARHGAP17	68.3916	31.3663	83.5097	35.2172	26.1867	20.8961	21.6267	16.3629	27.73	22.2721	31.6956	27.3127	69.4117	64.1048	29.4052
ENSSSCG00000004205	ARHGAP18	18.3586	13.066	3.89885	5.11864	9.24866	7.3168	8.23616	5.56559	18.2099	14.1894	21.8264	13.1964	19.5923	13.5563	3.20305
ENSSSCG00000011074	ARHGAP21	1.14943	0.480955	0.099321	0.0515645	0.128954	0.0939996	0.71165	0.375691	0.315319	0.344129	0.338735	0.258761	18.6116	22.5804	21.7643
ENSSSCG00000010381	ARHGAP22	3.88371	2.98837	1.57797	1.86157	0.00387933	0.224989	0.00132549	0.0289737	0.0261275	0.0653457	0.0433382	0.00498369	18.7623	26.9419	0.166605
ENSSSCG00000018058	ARHGAP23	0.271788	0.165611	0.0308152	0.00916371	0.00387933	0.00100702	0.17805	0.0305139	0.0453138	0.00247515	0.107528	0.128531	0.10691	0.0023305	3.59408
ENSSSCG00000009229	ARHGAP24	15.3153	9.50233	19.4926	11.3318	0.0315538	0.145229	0.307843	0.218255	0.0512092	0.142746	0.0281831	0.104691	11.7928	9.29665	5.30193
ENSSSCG00000008344	ARHGAP25	89.017	51.788	117.782	50.6653	57.7118	49.9961	68.7482	41.6251	70.4279	62.1092	108.121	114.514	71.7449	70.7368	95.7759
ENSSSCG00000014399	ARHGAP26	2.27591	1.17559	2.83554	2.15466	3.00886	2.44502	3.18932	1.7498	6.37132	5.0742	1.44823	1.53847	10.8784	14.1573	22.6638
ENSSSCG00000017328	ARHGAP27	50.5111	25.9963	57.1382	30.1385	49.7644	46.355	39.3423	29.8831	43.8236	36.7629	41.2086	34.9184	49.3434	48.8357	70.5585
ENSSSCG00000006372	ARHGAP30	152.44	76.8755	157.934	70.3995	163.961	133.265	152.65	81.4522	224.009	184.646	223.447	210.186	140.68	134.006	176.533
ENSSSCG00000026224	ARHGAP31	7.20947	4.03766	6.55963	4.14982	1.76877	1.33024	4.09985	2.35203	2.59389	1.71567	1.7609	1.04855	17.0636	19.3779	30.8051
ENSSSCG00000015238	ARHGAP32	0.153513	0.138535	0.0146036	0.0605527	0.0304446	0.0211143	0.0055421	0.0233793	0.00170735	0.0288512	0.0364233	0.146777	4.55989	7.56744	2.37016
ENSSSCG00000039135	ARHGAP33	2.12137	0.77143	0.554091	0.541363	0.542759	0.583153	0.991181	1.2344	1.3815	0.801928	1.08416	1.59722	0.446662	0.596555	4.08511
ENSSSCG00000003107	ARHGAP35	8.97136	6.27355	9.95159	5.02267	12.1811	11.379	8.77095	6.75668	13.77	11.2349	12.4492	12.8858	13.4799	16.7182	13.5178
ENSSSCG00000005894	ARHGAP39	1.99555	0.630628	4.17837	2.14628	2.343	2.13144	1.25164	1.56585	1.33333	1.56814	1.97375	2.25477	2.29003	1.74451	2.01559
ENSSSCG00000012790	ARHGAP4	153.238	82.5202	161.621	77.9291	175.606	162.239	178.975	119.835	189.953	160.418	191.186	181.961	95.2609	91.7197	125.527
ENSSSCG00000027565	ARHGAP45	203.542	148.594	230.778	104.996	401.129	280.612	315.466	196.821	453.057	292.592	401.258	335.945	224.403	199.915	218.814
ENSSSCG00000001966	ARHGAP5	1.94969	0.316608	0.539707	0.507416	0.529315	0.611439	1.0724	0.50165	0.545586	0.396513	0.443419	0.336609	1.7635	1.19153	12.6101
ENSSSCG00000012112	ARHGAP6	0.713771	0.807614	0.00331914	0.00916371	0.544175	0.32806	2.06944	0.688483	1.4719	0.602479	0.244796	0.142462	26.9774	29.0411	8.09577
ENSSSCG00000000437	ARHGAP9	43.6286	38.8931	52.6903	31.6026	87.1506	85.3715	94.0133	66.1765	46.6436	41.5654	74.0573	76.0321	46.3577	55.9816	157.334
ENSSSCG00000034058	ARHGDIA	123.273	149.01	87.2427	84.4933	133.538	101.91	137.154	112.155	220.834	129.183	167.366	118.18	159.861	131.666	155.647
ENSSSCG00000033337	ARHGDIB	557.116	683.113	406.47	353.285	917.851	540.889	846.684	611.869	1214.44	770.915	1032.97	618.589	313.818	264.393	850.658
ENSSSCG00000003040	ARHGEF1	22.7221	21.2586	21.5252	8.88156	180.674	173.17	141.017	75.7073	201.798	179.255	217.419	242.951	57.9411	80.0355	99.9803
ENSSSCG00000003486	ARHGEF10L	2.38589	2.48935	1.15856	1.37597	0.0297236	0.136341	0.0157453	0.0680375	0.0109051	0.0946389	0.016433	0.08302	31.8484	39.772	0.0611852
ENSSSCG00000006461	ARHGEF11	7.56898	8.93585	13.6012	5.76325	25.6204	24.6294	11.607	12.4159	16.9191	14.1555	22.3132	22.5295	14.4204	20.292	2.48568
ENSSSCG00000015129	ARHGEF12	2.02129	1.20182	3.96301	1.82764	0.170653	0.120488	0.0653376	0.140983	0.526527	0.163411	2.51686	2.08896	0.284027	0.204432	0.366292
ENSSSCG00000024223	ARHGEF16	0.150304	3.63309	0.42792	0.206007	20.9554	30.2087	18.8591	15.823	22.2417	28.0447	14.5962	20.5664	0.00154798	0.0466644	0.352829
ENSSSCG00000006502	ARHGEF2	60.3041	30.7062	62.911	28.2575	59.1579	64.1768	32.6126	22.8069	55.9704	53.9974	73.1654	79.5478	64.6058	77.829	37.2831
ENSSSCG00000030359	ARHGEF3	47.1763	23.0137	59.2069	28.2285	50.9884	49.9692	40.1499	26.5131	67.2329	68.1102	39.8801	39.1807	3.44716	4.09963	121.505
ENSSSCG00000014436	ARHGEF37	0.825788	0.530606	0.489086	0.475238	1.35559	1.24257	1.02191	0.972414	0.646518	0.874608	1.18485	1.42386	0.486192	0.553475	0.396368
ENSSSCG00000005314	ARHGEF39	23.9878	8.83556	14.6829	11.704	6.00773	8.77196	6.37227	6.17849	5.66516	9.25444	8.23294	9.95389	1.36742	0.747559	19.7931
ENSSSCG00000035828	ARHGEF4	0.0532574	0.0512058	0.00331914	0.00916371	4.71973	4.68279	3.09473	3.67397	1.59879	1.33753	0.0866465	0.0284526	0.414791	0.48291	0.0108591
ENSSSCG00000030460	ARHGEF6	42.2744	32.9242	36.8162	25.7781	72.8328	59.0963	39.5612	29.9093	77.7354	56.8506	97.1399	92.9002	40.3898	46.3123	52.7698
ENSSSCG00000009551	ARHGEF7	23.2013	20.9552	30.9322	16.9448	51.3486	46.1345	39.4181	29.2985	53.1472	44.4211	46.6348	44.9047	20.6154	21.5112	30.2259
ENSSSCG00000003559	ARID1A	41.5149	20.9111	52.7624	16.3516	71.2707	68.5071	42.9866	28.0485	63.3382	53.6763	71.5578	77.8875	35.2636	47.7005	63.8398
ENSSSCG00000004064	ARID1B	9.12347	3.73424	12.1179	5.24842	17.5141	15.1133	11.4537	7.79784	16.2043	12.7179	16.2499	14.7906	11.4882	11.0615	14.3319
ENSSSCG00000030685	ARID2	8.71283	4.60567	9.36939	6.57608	12.8147	10.0943	6.39568	4.98005	12.9248	9.70819	10.6114	10.3921	6.62597	6.49288	18.1702
ENSSSCG00000037642	ARID3A	17.7055	13.4835	14.4917	11.6667	6.23556	6.51013	6.51999	5.14984	5.97717	6.61034	4.72942	3.81585	25.8004	27.5162	15.0184
ENSSSCG00000001905	ARID3B	5.09067	4.39609	5.79904	3.61974	3.71683	5.20942	2.28275	3.48601	6.59311	6.49474	10.0707	10.6543	2.21858	3.60577	3.72123
ENSSSCG00000005073	ARID4A	12.4871	5.3238	18.0204	9.21636	20.6075	20.296	13.0834	7.2387	19.6854	22.4577	26.1041	30.3988	19.278	25.0767	18.4684
ENSSSCG00000010156	ARID4B	78.6758	42.3215	93.7211	62.4498	81.4198	73.6934	64.5884	46.1707	68.5591	89.6327	84.2826	103.408	43.3384	47.2915	85.9907
ENSSSCG00000008123	ARID5A	21.946	25.3246	17.0315	19.8015	15.5819	13.7156	20.8571	20.5051	20.0806	13.9177	25.7061	24.7451	40.8245	44.9334	34.5531
ENSSSCG00000010219	ARID5B	8.69895	6.0861	20.0751	10.303	13.0303	12.5352	5.28205	4.46403	14.9118	13.6966	25.3357	26.188	8.56022	12.6305	8.89689
ENSSSCG00000011367	ARIH2	37.4005	22.6102	41.8785	26.6372	37.1033	40.1518	28.6232	26.1128	36.5423	41.475	36.0009	45.0204	33.2226	42.3884	43.7542
ENSSSCG00000000870	ARL1	18.0081	22.7705	13.652	24.5189	14.5423	15.0806	13.6076	16.2653	15.141	15.5358	14.1305	11.8431	18.7395	21.5898	16.4542
ENSSSCG00000029985	ARL10	8.50447	8.50768	10.0357	9.47731	10.4765	11.3436	14.2911	14.903	8.56099	7.83542	16.9385	13.9956	2.59753	1.95199	13.4805
ENSSSCG00000036810	ARL11	0.367656	0.555679	0.176627	0.228691	0.0668281	0.0658762	0.0305139	0.0456234	0.0370281	0.0541794	0.0385408	0.189097	8.03241	5.73091	0.0267069
ENSSSCG00000027571	ARL13B	1.92639	2.17403	4.12881	2.44021	3.53802	3.83003	2.02178	3.10417	1.95543	3.20331	4.75607	5.5229	2.26571	3.27809	1.90466
ENSSSCG00000039889	ARL14EP	10.4195	6.37835	7.23582	7.22909	11.0185	6.55407	7.06519	6.9725	9.76469	11.0386	8.11221	6.49816	6.7678	4.9124	10.4538
ENSSSCG00000034387	ARL2	6.45093	19.8753	6.75191	11.0387	7.76104	9.53293	9.92879	17.8213	7.12021	7.07147	10.4516	11.7015	11.7155	12.1598	6.50517
ENSSSCG00000002819	ARL2BP	32.858	47.7162	39.6086	54.239	36.5549	37.5493	32.1105	44.8039	32.4026	32.7389	37.0465	30.6009	19.6466	19.7904	36.4215
ENSSSCG00000032709	ARL4A	3.25332	14.323	0.385209	0.335839	1.19386	4.46166	0.332138	0.738041	2.72323	5.90194	9.88909	15.9283	3.10443	5.90883	1.01308
ENSSSCG00000034293	ARL4C	4.17203	11.9802	1.01967	2.60548	234.419	195.046	184.946	161.76	102.637	91.0768	13.8594	9.24066	4.97664	7.5917	9.39352
ENSSSCG00000017380	ARL4D	0.0528832	0.306131	2.05887	0.35417	0.228122	1.60567	0.11466	0.0717804	0.304476	1.73106	0.0011845	1.68026	0.00154798	0.0375867	0.0648579
ENSSSCG00000031541	ARL5A	85.953	56.02	79.59	85.0041	48.8884	37.0333	30.0725	38.8947	43.4006	32.4272	42.3761	38.2574	49.7688	37.9963	86.0751
ENSSSCG00000031456	ARL5B	10.4153	7.22308	10.8014	10.9064	9.66019	13.4508	5.10131	7.3457	12.8169	20.6581	9.92986	15.9673	19.651	28.1393	8.25136
ENSSSCG00000027278	ARL6	3.3493	1.87339	5.31455	2.48507	3.10756	3.23887	1.65597	2.42072	2.37203	3.48268	18.403	18.5443	2.50785	2.47963	2.54806
ENSSSCG00000025281	ARL6IP1	188.55	183.36	122.92	204.02	468.588	238.41	292.524	195.175	484.741	294.165	294.023	134.789	144.314	104.647	402.353
ENSSSCG00000009782	ARL6IP4	33.7122	26.8684	37.8218	28.9382	25.7267	37.9522	31.2442	26.8667	23.6377	25.0098	30.3623	43.6242	15.3482	13.1458	30.833
ENSSSCG00000033154	ARL6IP5	117.303	161.277	153.299	241.889	174.119	139.056	115.537	144.799	206.406	180.838	137.503	107.97	18.5178	17.3262	87.3766
ENSSSCG00000015868	ARL6IP6	58.0836	46.0591	37.967	64.4297	47.4176	42.7521	49.3423	51.3684	50.2529	57.748	47.1423	37.7819	58.3312	52.1753	64.0717
ENSSSCG00000036967	ARL8A	42.0773	23.2108	28.887	20.1995	17.5742	15.192	33.1183	21.3001	26.5744	22.6931	39.2221	24.1426	98.6912	64.9702	32.4228
ENSSSCG00000011535	ARL8B	94.7513	99.5321	72.3057	118.971	69.578	67.3265	55.9999	98.5415	98.1438	88.9308	78.9697	82.334	212.358	152.293	91.7702
ENSSSCG00000006220	ARMC1	22.4346	29.477	14.9741	29.3361	18.0825	17.3204	15.744	18.5743	20.7692	17.7204	20.6203	17.3946	25.1872	16.2332	25.5254
ENSSSCG00000028444	ARMC10	42.1174	73.1023	39.8105	64.1871	50.0357	45.2518	50.9905	70.3612	49.0759	53.0969	68.8987	63.7543	84.2349	79.5213	83.8416
ENSSSCG00000011069	ARMC4	0.672681	1.22992	1.20364	2.51645	0.0407163	0.102554	0.016488	0.0510226	0.0175393	0.106372	0.0822051	0.26126	0.657992	0.0760814	0.0849622
ENSSSCG00000025245	ARMC5	1.38579	6.11495	1.63104	2.8212	2.44662	1.80072	3.75092	2.1969	2.94042	1.21837	3.03936	2.96286	1.74536	1.24282	3.34939
ENSSSCG00000017214	ARMC7	12.296	6.84839	13.8663	6.6929	9.79795	13.2192	5.86671	5.88092	10.6932	17.1806	9.79642	21.0298	3.68872	5.18328	6.91652
ENSSSCG00000036610	ARMC8	11.2802	14.1726	15.5971	16.3705	18.1715	18.2622	12.112	14.5754	14.712	15.5967	16.0999	19.2175	14.236	15.7123	13.4949
ENSSSCG00000023994	ARMC9	0.448682	0.953859	0.725281	1.50944	0.785526	0.862243	0.221161	0.533708	0.50358	0.369736	0.343944	0.567657	0.318798	0.458407	0.409824
ENSSSCG00000040281	ARMCX3	5.55885	10.0551	4.16697	8.6392	6.57278	4.63951	5.98508	7.53159	5.27413	4.15504	6.69575	4.21073	5.76543	3.03801	10.1814
ENSSSCG00000012518	ARMCX5	11.248	10.6152	9.21002	9.98109	14.5689	15.5644	10.2405	13.9546	9.38836	10.4327	12.9418	13.08	8.25422	4.43941	12.5112
ENSSSCG00000012508	ARMCX6	2.50144	6.58096	3.45186	4.86148	10.4726	9.93722	8.8433	11.1577	5.37695	5.37379	7.46681	6.39803	1.40569	0.642149	13.3174
ENSSSCG00000010571	ARMH3	6.70407	8.49879	8.976	8.64569	8.17399	7.70837	8.85218	8.02286	8.20516	7.39852	10.3354	11.5942	10.2576	10.1603	10.6409
ENSSSCG00000004088	ARMT1	9.30996	6.56603	3.78889	9.46119	5.41376	3.55607	5.05912	7.04876	7.08191	5.80597	5.17179	5.11585	12.787	6.43944	9.32223
ENSSSCG00000006646	ARNT	27.0727	12.8468	53.6689	18.4061	25.5034	26.8766	16.1583	11.3502	28.8836	32.8835	36.2249	62.5047	24.9983	33.2791	27.7406
ENSSSCG00000013397	ARNTL	3.10519	2.41121	4.67426	3.08416	8.91894	8.74038	7.92407	5.34622	13.6012	17.356	8.95346	8.96976	3.95002	6.98249	13.5672
ENSSSCG00000007625	ARPC1B	446.527	385.497	405.474	371.689	392.926	271.345	307.741	282.776	473.789	323.041	229.145	182.925	706.528	589.757	372.921
ENSSSCG00000016185	ARPC2	783.63	597.916	680.564	672.356	796.308	626.154	726.613	642.497	893.104	813.847	673.584	582.918	1036.36	958.091	862.898
ENSSSCG00000009821	ARPC3	569.68	737.522	504.465	810.844	462.372	562.287	511.31	714.624	544.651	722.141	394.531	424.469	763.615	883.133	484.24
ENSSSCG00000011552	ARPC4	232.978	268.639	193.218	263.582	244.486	219.66	270.404	253.114	353.796	277.859	260.083	183.855	469.01	391.916	257.685
ENSSSCG00000015560	ARPC5	360.514	342.623	278.344	464.959	478.018	375.847	364.737	409.828	608.689	499.114	335.945	205.695	844.48	598.191	367.346
ENSSSCG00000005596	ARPC5L	145.058	136.8	185.859	215.97	57.5468	55.2267	87.5445	75.8036	71.9933	87.7284	39.1569	36.6824	26.1138	29.5649	207.125
ENSSSCG00000011238	ARPP21	10.0104	0.0481166	0.435934	0.0938525	0.0233326	0.00100702	0.74613	1.09545	3.79903	0.381833	0.0813471	0.00498369	0.579422	0.426247	30.6617
ENSSSCG00000014852	ARRB1	10.1957	18.2948	4.56822	5.65114	50.3582	41.6273	26.265	25.9325	26.247	19.1896	40.985	38.9074	57.3612	55.7646	7.59323
ENSSSCG00000017918	ARRB2	91.4704	69.0234	64.1231	54.0732	75.6454	88.3419	113.248	78.6197	103.359	106.468	98.1115	113.566	282.202	280.396	201.354
ENSSSCG00000039824	ARRDC1	10.3314	10.8245	13.997	8.10269	18.3893	18.4067	15.9917	14.0547	20.9119	18.7862	25.9025	32.9916	15.3793	15.9663	15.6103
ENSSSCG00000013893	ARRDC2	67.597	44.6103	77.5759	52.5335	61.5015	66.2952	64.825	40.8088	99.9463	101.653	78.6478	73.3214	42.7036	45.5255	37.5647
ENSSSCG00000014156	ARRDC3	40.1476	18.5957	82.8186	35.0404	61.568	91.6588	30.223	30.7958	39.9708	71.8197	58.9057	113.051	26.3333	111.231	77.4932
ENSSSCG00000002252	ARRDC4	11.4716	4.41109	7.75165	10.5915	7.37915	10.1591	5.6167	5.54629	6.7867	8.2983	5.61307	6.34807	55.2218	63.2266	4.79077
ENSSSCG00000037183	ARRDC5	0.636415	3.8138	0.355789	3.40616	0.0323454	0.0352285	0.0146002	0.121021	0.146849	0.219623	0.0170128	0.0392769	0.00154798	0.0023305	0.342191
ENSSSCG00000032428	ARSA	16.6587	10.1263	19.2589	13.4474	9.3106	10.5494	8.78746	8.56645	14.9828	10.3563	5.70476	4.65414	14.0301	13.2781	2.25694
ENSSSCG00000038535	ARSB	6.6159	8.62134	10.6974	8.98992	3.36382	2.94732	4.20103	2.89481	5.04951	3.97146	6.29656	4.28849	26.4906	26.5644	4.97821
ENSSSCG00000017261	ARSG	1.79574	1.21889	0.439807	0.610178	1.48778	1.95589	2.99569	4.40464	3.35539	1.58471	2.8092	4.215	0.989247	1.49463	12.4966
ENSSSCG00000010179	ARV1	20.3803	18.7147	18.4789	26.0275	10.5961	14.2036	10.5193	17.6168	8.74661	11.75	9.01101	11.469	41.6196	35.4897	11.111
ENSSSCG00000010133	ARVCF	1.08342	1.00297	0.80114	0.576281	2.4996	2.8635	2.03431	1.78887	2.33622	2.42296	2.36627	2.68913	1.89598	2.56173	1.96697
ENSSSCG00000010592	AS3MT	3.33536	1.04206	3.98271	2.72172	4.52421	3.37324	6.73262	4.99269	2.40959	1.93575	3.92766	3.08414	2.09992	1.35879	2.35842
ENSSSCG00000006995	ASAH1	4.02734	10.5592	4.16408	8.26905	8.46698	7.72462	7.15481	9.14178	15.7996	13.8237	13.08	9.53307	307.903	215.969	5.9647
ENSSSCG00000028759	ASAP1	22.2363	16.864	23.4574	14.0879	29.1843	27.9047	33.5173	24.9823	34.946	28.5194	67.9257	70.7186	33.3635	29.09	22.7647
ENSSSCG00000008642	ASAP2	0.444207	0.64471	0.946594	0.402296	6.66618	9.686	0.883896	1.26619	4.68603	5.6576	1.4401	3.28667	0.658841	0.749247	1.73682
ENSSSCG00000028108	ASAP3	0.0747034	0.189114	0.249244	0.46999	0.109187	0.10714	0.0203472	0.210574	0.0994296	0.216264	0.248988	0.945139	9.45358	17.7121	0.204566
ENSSSCG00000016340	ASB1	11.2227	6.36368	9.89947	7.24066	8.93363	8.89209	12.1954	7.17672	7.51089	7.12891	11.8695	12.7531	5.64671	5.84643	14.895
ENSSSCG00000011145	ASB13	12.0264	6.98938	15.338	8.73288	22.4142	26.5149	21.8252	18.1023	17.1657	23.4568	21.629	24.5661	5.65796	7.07121	15.8714
ENSSSCG00000039673	ASB16	1.24415	0.782499	0.753587	0.346559	0.450456	0.627744	0.260954	0.32072	0.348237	0.478433	0.370263	0.660768	0.237659	0.383029	0.384652
ENSSSCG00000008415	ASB3	11.8459	11.0435	9.56731	15.6499	11.6437	9.9905	10.2016	10.2818	13.9369	10.1684	14.3347	11.8821	6.48874	4.7756	17.7765
ENSSSCG00000005679	ASB6	5.31296	6.90459	6.2612	5.17193	8.5854	6.70665	8.45927	7.64727	9.52781	6.6387	9.38975	7.22277	7.05193	5.45142	7.08253
ENSSSCG00000004821	ASB7	5.24113	3.32361	6.76445	6.51438	5.60054	4.97992	4.24352	3.50487	5.59151	5.68865	5.90202	5.96047	10.5986	9.98353	5.92009
ENSSSCG00000021024	ASB8	9.74966	13.8842	8.10269	17.3859	14.974	10.863	15.5634	16.2088	16.9489	9.39494	15.6017	7.95107	10.9597	7.31254	14.1608
ENSSSCG00000012132	ASB9	2.44348	47.6289	0.869276	2.16624	18.5508	27.9144	15.6114	31.6574	18.7661	21.3881	48.6337	52.5372	27.8185	28.6241	0.415686
ENSSSCG00000023130	ASCC1	33.1206	44.6633	43.7835	62.237	26.6601	25.6304	36.0679	45.7005	22.0631	20.9162	33.1263	22.7766	34.4632	28.9236	40.3389
ENSSSCG00000025186	ASCC2	5.97947	3.80842	5.55046	3.83475	7.01158	6.53346	5.40633	4.55296	7.87265	6.88833	7.44109	6.61334	4.90324	4.76037	6.33174
ENSSSCG00000004358	ASCC3	8.78674	6.54699	10.1294	7.06112	8.03177	8.01031	5.51527	5.57563	9.71515	9.2139	8.44073	8.09311	8.45941	9.13436	9.19993
ENSSSCG00000004247	ASF1A	23.0023	23.5197	12.9891	29.8255	20.8043	23.0097	15.5814	15.8354	19.1679	23.3772	14.8386	12.574	15.7379	14.4927	29.7121
ENSSSCG00000013772	ASF1B	37.3159	14.7758	10.5738	26.7781	5.13666	2.88532	9.22128	5.68583	19.2	11.0603	4.13534	1.3699	0.200525	0.133892	78.1126
ENSSSCG00000006508	ASH1L	4.37198	1.45595	8.79034	2.68549	6.80356	8.91468	3.0868	2.38997	5.73763	9.245	7.34673	11.4488	3.7415	6.05932	4.79678
ENSSSCG00000021898	ASH2L	15.6485	17.5882	9.91951	16.7955	17.1063	10.9418	16.3673	15.6506	18.3295	12.8534	17.6191	10.3762	8.56416	5.82703	25.4411
ENSSSCG00000029968	ASIC4	0.419651	4.23966	0.174227	0.13078	0.0775647	0.0135376	0.0149014	0.00422539	0.00170735	0.0343454	19.3704	15.7363	0.0218599	0.0233627	0.00079626
ENSSSCG00000007738	ASL	0.376465	0.829586	0.55609	0.733632	0.574255	0.403866	0.169863	0.26792	0.756133	0.648569	0.957073	1.08145	2.12722	2.22326	0.204843
ENSSSCG00000037174	ASMTL	5.92807	3.52233	5.89644	2.92939	6.72906	9.25139	6.41706	6.07893	4.93052	5.58	4.38929	6.19637	5.88145	6.74226	6.22222
ENSSSCG00000015340	ASNS	54.8969	27.5701	13.6068	22.4386	25.7618	21.9156	40.4816	30.6385	38.3421	23.0644	17.711	13.3334	17.2302	12.9995	62.9708
ENSSSCG00000017861	ASPA	5.13192	18.6596	2.83718	7.11178	3.76126	4.20257	2.01708	3.97602	9.97821	11.1107	18.7786	17.3694	1.45056	1.12085	1.09444
ENSSSCG00000003217	ASPDH	14.7918	36.2305	13.2229	22.8627	28.4197	25.0312	19.6752	23.421	30.9403	26.5319	21.6873	18.3622	30.0618	23.0361	20.3323
ENSSSCG00000039553	ASPG	0.0039879	0.0668217	0.00331914	0.00916371	0.00387933	0.00100702	0.00132549	0.00422539	0.0285989	0.0240885	0.00952322	0.00498369	1.70289	1.12714	0.00079626
ENSSSCG00000025087	ASPH	4.63167	2.12532	0.53176	0.762416	7.81636	5.22129	4.0076	4.20355	2.44176	2.09588	3.33355	2.42755	2.36869	1.97612	2.38425
ENSSSCG00000009959	ASPHD2	7.14617	8.44225	5.23335	4.6201	3.6129	3.6995	2.308	2.22852	4.46677	4.42901	4.15455	4.68242	5.56006	3.95164	2.01268
ENSSSCG00000010896	ASPM	3.49684	1.19102	1.96928	3.0241	0.82852	0.59299	0.579882	0.211704	3.36376	2.26783	0.328439	0.277821	0.0854648	0.089348	11.3636
ENSSSCG00000040727	ASPSCR1	54.7017	27.7763	41.931	25.3568	52.7939	69.8614	56.0482	43.1282	45.2567	55.2095	51.9026	68.4239	44.0486	58.7899	40.8368
ENSSSCG00000013065	ASRGL1	6.68203	9.11367	5.31614	6.45678	6.25851	6.01899	6.64027	5.59649	9.3298	7.16308	5.34347	5.85155	25.241	24.5329	9.44995
ENSSSCG00000011182	ASTE1	5.08492	7.51437	5.62574	8.12324	7.13506	5.89938	6.21973	6.45258	5.82089	6.76134	9.00034	8.07109	6.83915	6.51176	4.91022
ENSSSCG00000007248	ASXL1	21.9598	10.6772	22.6573	10.9884	37.8255	34.7817	24.2416	19.6554	40.1755	31.8578	31.0635	30.209	9.49124	12.3098	28.1191
ENSSSCG00000008575	ASXL2	4.95051	3.09139	6.45941	3.79908	7.72462	7.2128	3.59999	3.10967	9.64551	9.26105	7.15248	10.2774	8.24693	7.25738	10.6589
ENSSSCG00000010438	ATAD1	14.143	20.4184	18.4743	35.1537	19.3975	17.7949	16.8059	23.9964	22.6144	20.8896	19.3271	16.606	25.6192	22.8253	25.6301
ENSSSCG00000005983	ATAD2	18.8929	5.60328	9.13348	9.38279	4.18921	3.54507	3.70386	2.82034	11.2466	10.2444	4.1423	3.86869	4.09046	4.98468	36.523
ENSSSCG00000008591	ATAD2B	7.25583	2.86038	9.3964	5.20122	8.22468	9.78922	4.59788	3.51122	6.67833	9.60665	8.33452	13.4937	10.5716	14.1731	8.70927
ENSSSCG00000003343	ATAD3A	9.2828	8.84863	8.72473	9.03278	14.362	15.0381	19.9065	16.023	12.4673	13.5392	11.5653	12.3603	6.75516	6.61954	7.29694
ENSSSCG00000035954	ATAD5	4.59901	0.68096	3.64907	4.08937	3.53398	3.50114	1.68747	1.62905	4.70483	5.08798	2.57605	3.30803	0.976476	1.16136	8.917
ENSSSCG00000024604	ATAT1	9.10831	2.04127	11.9196	4.53208	3.63774	5.59137	2.52048	4.01049	2.46125	2.79471	6.44732	6.6876	2.38831	2.52134	3.02095
ENSSSCG00000026754	ATCAY	0.301198	0.13954	0.498267	0.362024	0.686248	0.885676	0.31817	0.281661	1.48559	0.944082	0.601961	0.741447	0.206198	0.179192	0.354941
ENSSSCG00000010699	ATE1	11.9939	9.73639	13.5764	13.2436	20.0187	11.1426	13.2063	13.6881	22.0455	15.2083	20.488	15.5912	15.7987	9.96041	23.1059
ENSSSCG00000016138	ATF1	23.3671	34.7693	26.3435	31.0591	46.7701	44.0023	33.8656	37.6816	49.0246	56.4144	41.1682	50.6994	30.6643	28.2972	59.0203
ENSSSCG00000038076	ATF2	25.6417	21.1879	25.2032	22.4022	25.1605	29.0365	15.5718	16.8702	24.6508	30.0711	26.0193	38.0822	24.5038	21.7989	29.4289
ENSSSCG00000015595	ATF3	4.71556	3.9111	69.7846	6.34611	3.32759	80.524	1.10678	3.0763	1.23482	87.1873	2.4464	118.807	27.2546	257.149	2.14391
ENSSSCG00000000084	ATF4	387.071	257.209	845.302	215.221	220.775	623.232	248.366	220.656	232.863	712.541	407.161	1162.76	218.878	612.964	305.163
ENSSSCG00000003201	ATF5	8.6265	8.0578	6.96806	9.20186	5.1841	3.78958	4.04465	5.86276	4.00732	4.00019	2.57486	2.99535	6.52354	5.43108	8.22515
ENSSSCG00000006346	ATF6	13.5158	9.22508	11.8165	12.9911	1.74668	1.0614	5.91629	4.26466	4.67101	3.24812	4.02779	2.82634	52.2612	47.7904	14.927
ENSSSCG00000001430	ATF6B	66.8197	47.1961	72.1378	48.8411	40.0047	36.4053	42.5371	33.9955	43.9097	33.1331	45.8392	41.3235	64.8997	59.9363	33.5476
ENSSSCG00000000612	ATF7IP	30.6792	13.6414	48.5866	21.1143	54.1071	48.647	23.3239	19.0793	52.4323	51.0839	37.3278	45.5757	29.7011	33.6001	42.7365
ENSSSCG00000020675	ATF7IP2	10.1852	5.82627	5.82503	7.7137	4.20845	3.55965	5.85223	5.62602	4.15622	6.0244	2.70901	3.79532	2.18231	2.08041	11.1332
ENSSSCG00000025210	ATG10	5.7209	19.452	5.56515	14.17	10.217	14.0212	9.48861	18.0824	7.89274	8.91254	9.90835	9.7013	6.39065	6.77279	9.3269
ENSSSCG00000033687	ATG101	11.5876	30.2608	8.09679	18.4597	11.2097	12.4765	14.0782	17.7545	14.7725	10.7911	13.9667	14.4694	12.1385	9.91065	15.3742
ENSSSCG00000033912	ATG12	18.3359	20.2824	11.1998	22.3249	14.4682	13.9996	13.9352	17.0272	17.3922	16.4284	17.3896	11.4872	24.6101	18.5829	13.7159
ENSSSCG00000013257	ATG13	22.6925	22.2954	16.9891	14.9058	27.8581	19.4912	27.7815	20.8012	31.1969	21.4204	34.2562	24.2789	25.1099	18.3525	25.7869
ENSSSCG00000005058	ATG14	0.794647	0.98618	1.47136	1.09846	1.77858	1.80525	0.778101	0.644609	1.68241	1.85027	1.62831	1.97257	0.916895	1.05406	0.634154
ENSSSCG00000016300	ATG16L1	14.3965	6.3036	20.0638	9.26567	14.8097	21.0274	14.4125	10.4004	13.6124	17.9901	18.6012	22.5611	7.47824	10.6074	11.0806
ENSSSCG00000014819	ATG16L2	37.7867	21.5158	35.6333	17.5341	10.8566	14.0724	12.4791	11.5026	6.97718	11.9681	19.4433	25.9025	55.3965	73.3357	5.96808
ENSSSCG00000023890	ATG2A	8.34447	7.87638	6.59609	4.79377	14.6895	14.3317	10.4619	8.74772	17.5128	11.0021	10.1073	10.0046	14.7484	15.248	10.2933
ENSSSCG00000002502	ATG2B	7.48172	3.51924	9.34421	5.25097	8.3106	8.43053	6.25229	4.25552	9.81306	8.75029	11.6049	13.7378	7.86851	11.5121	9.00451
ENSSSCG00000011930	ATG3	35.671	42.9293	27.2596	44.0554	42.4172	40.9068	37.0347	35.3985	43.735	46.9599	33.331	27.2094	127.105	114.823	40.8167
ENSSSCG00000012569	ATG4A	3.39733	7.73996	3.07594	6.28421	4.79074	5.11164	6.09893	6.86478	6.81665	6.93788	5.32114	4.62929	5.34605	5.9993	12.6415
ENSSSCG00000032919	ATG4B	18.9343	22.8843	19.7088	18.5091	23.7405	22.6814	27.9765	21.0811	24.439	25.1381	25.5276	25.1134	13.6948	14.5137	29.0671
ENSSSCG00000003816	ATG4C	9.34362	30.5327	8.96055	15.4836	8.81227	15.3497	7.80209	15.218	10.0806	11.698	31.6628	50.4308	21.317	18.7208	12.7557
ENSSSCG00000013645	ATG4D	15.2941	12.4903	13.0446	10.8149	10.2984	12.7027	16.8654	15.5374	10.7306	11.3114	14.0901	20.1834	11.1237	11.1663	29.8896
ENSSSCG00000004370	ATG5	41.8146	55.0798	42.4336	74.4002	41.253	36.564	28.8442	39.809	56.2036	55.9512	37.3568	37.036	47.9052	50.204	44.266
ENSSSCG00000011575	ATG7	6.93828	15.0451	6.61411	10.3353	10.0862	13.149	7.37809	13.096	10.527	13.1228	10.4938	11.9856	26.7008	29.6487	8.39995
ENSSSCG00000016211	ATG9A	10.8567	9.99375	11.5767	6.40035	14.6576	16.1271	15.1617	11.607	14.1333	13.7474	18.3914	17.3783	19.0254	22.3782	13.1736
ENSSSCG00000016173	ATIC	21.1427	17.0497	10.9642	21.0603	17.6915	15.2401	16.3498	23.8031	13.4638	12.0812	14.658	10.79	6.67727	4.0938	16.6624
ENSSSCG00000005020	ATL1	0.514055	0.380124	1.32835	0.83331	0.21591	0.163966	0.130024	0.226615	0.297975	0.470231	0.346824	0.453474	0.377394	0.348552	0.14506
ENSSSCG00000008487	ATL2	47.867	25.5313	37.0955	31.6947	24.7067	26.7628	19.219	19.4137	18.9036	18.3053	27.403	33.0264	14.7828	12.4486	28.2373
ENSSSCG00000013054	ATL3	24.4466	21.8525	13.1301	23.3342	27.5565	16.3171	24.407	20.5344	54.8808	29.4429	25.5339	12.9379	29.2895	16.7998	29.685
ENSSSCG00000025606	ATM	7.15754	1.95585	10.0775	5.83784	7.98133	7.84687	4.90826	3.15874	6.97248	8.64621	6.76773	9.21262	3.86829	4.38299	4.30412
ENSSSCG00000032216	ATMIN	17.171	13.9209	16.1443	14.0091	36.2434	29.3	21.132	19.7435	29.0033	21.5365	21.3542	19.9067	18.4337	18.0146	17.4005
ENSSSCG00000025117	ATN1	7.05132	16.3974	9.70696	7.34734	24.7375	30.7061	15.716	26.6716	23.9497	21.0754	27.4633	34.4538	13.113	15.7308	18.1337
ENSSSCG00000008230	ATOH8	0.0368418	0.0117741	0.00331914	0.0709251	0.00387933	0.0206706	1.27784	0.983702	0.113623	0.256447	0.0011845	0.00498369	0.117379	0.279347	16.6013
ENSSSCG00000008812	ATP10D	13.43	8.32764	14.1536	13.9051	0.943995	0.792325	1.09066	1.14081	1.63334	1.26885	2.48299	1.85473	16.1126	16.0543	1.65995
ENSSSCG00000037561	ATP11A	20.8908	8.02552	47.4995	11.3344	52.1319	64.1394	18.4395	14.7049	30.4747	38.5584	21.8534	32.0967	13.614	15.152	4.48094
ENSSSCG00000011772	ATP11B	23.1672	25.5165	16.0382	18.2865	39.3678	43.9628	21.6084	26.0698	49.8837	57.9328	40.6989	65.5368	30.2963	39.3094	54.5811
ENSSSCG00000012713	ATP11C	9.70104	5.62055	10.9571	7.46751	11.1619	12.0766	7.59768	7.12165	13.2162	13.8629	13.6137	19.0293	19.3324	17.1544	10.6236
ENSSSCG00000013930	ATP13A1	29.7181	19.207	25.4261	16.0217	22.9482	26.0994	26.8029	23.3003	28.1734	21.5456	28.8492	27.0972	26.145	28.819	29.4866
ENSSSCG00000031082	ATP13A2	19.7265	27.2719	34.7671	19.6096	24.9849	25.0371	32.8662	28.6611	41.5654	24.7204	34.6545	31.595	143.627	129.284	61.8808
ENSSSCG00000011825	ATP13A3	15.6678	13.0325	13.3128	14.9642	11.7872	11.7192	7.41619	7.71221	17.0631	14.6447	11.9984	14.9523	22.0285	19.0789	16.5211
ENSSSCG00000026260	ATP13A5	1.37817	0.289689	1.41601	1.08343	1.66801	1.87624	1.36321	1.17075	1.37463	1.88525	1.79713	2.25239	0.73058	0.957144	1.62753
ENSSSCG00000006740	ATP1A1	49.8996	32.9441	24.0381	22.4735	54.8586	36.3934	61.232	41.0259	81.7422	60.0823	48.9673	28.3667	109.723	99.62	86.6196
ENSSSCG00000006296	ATP1B1	0.981346	1.99894	0.314215	0.0660324	0.444191	0.778185	0.135579	0.00422539	1.01807	1.35624	0.0647391	0.0689745	55.6172	45.377	0.00079626
ENSSSCG00000017951	ATP1B2	0.0648309	0.0117741	0.00331914	0.106074	1.13682	1.00248	0.0973279	0.309437	7.39852	3.5365	0.0011845	0.127955	0.00154798	0.0023305	0.631824
ENSSSCG00000000453	ATP23	5.27942	10.3019	4.94117	14.6618	5.46767	5.87768	5.19635	7.24351	6.29966	8.6332	5.53355	4.94742	7.03141	7.46492	6.24705
ENSSSCG00000034386	ATP2A2	25.6002	15.9724	20.2835	16.8587	28.7925	27.3687	14.4723	14.1069	24.3846	22.6293	17.4226	19.7945	25.4739	24.567	23.3014
ENSSSCG00000017874	ATP2A3	98.9144	80.0115	98.6883	58.1535	163.474	125.725	141.78	112.093	170.736	101.056	135.42	110.318	69.8729	68.5313	236.755
ENSSSCG00000027898	ATP2B1	27.8265	12.599	40.355	14.3946	22.1661	24.2916	16.2141	11.2455	33.8624	43.806	28.8635	43.0631	41.0639	36.5452	43.3546
ENSSSCG00000015273	ATP2B4	11.5051	10.0616	5.63054	6.18493	9.93329	5.76984	6.92491	4.33308	15.5662	10.4639	29.3669	19.5887	54.0122	45.2546	6.16439
ENSSSCG00000011183	ATP2C1	26.3798	18.061	24.8029	19.6797	27.8217	26.2561	22.0408	21.5348	31.4449	32.0497	29.1628	32.3613	52.5268	53.8897	56.8431
ENSSSCG00000004499	ATP5F1A	399.103	471.837	257.493	506.258	361.646	275.261	371.516	414.833	367.213	304.087	332.774	228.286	456.356	374.232	435.746
ENSSSCG00000034086	ATP5F1C	107.433	145.058	86.55	150.113	91.6588	109.309	101.831	138.914	92.3216	135.86	93.3196	96.3737	127.406	150.935	106.061
ENSSSCG00000035532	ATP5F1D	16.8185	38.4735	11.5733	25.2152	14.9316	14.8796	19.6332	29.0259	17.7666	13.7129	15.2666	11.299	25.7861	21.4252	22.3199
ENSSSCG00000027072	ATP5IF1	255.068	364.758	141.35	301.572	146.189	234.419	175.24	308.22	165.242	218.73	131.242	142.427	220.769	219.24	186.432
ENSSSCG00000017544	ATP5MC1	86.3644	186.297	69.8395	163.15	43.9628	65.1818	47.3788	90.4028	54.4416	70.1144	33.6598	39.309	68.4547	75.3867	46.844
ENSSSCG00000033368	ATP5MC2	533.113	654.665	395.748	804.491	520.692	509.395	565.668	679.652	431.564	463.863	427.26	322.78	608.649	487.738	499.79
ENSSSCG00000015973	ATP5MC3	411.268	559.251	228.762	611.527	279.573	300.621	318.592	399.053	371.35	363.518	243.535	192.284	513.758	432.046	501.003
ENSSSCG00000032165	ATP5MD	500.694	626.507	383.51	746.635	441.189	594.371	490.929	733.926	449.214	513.002	359.975	358.501	389.7	414.597	528.839
ENSSSCG00000023903	ATP5ME	231.685	295.107	181.664	217.579	152.727	199.737	171.388	227.301	160.207	204.926	136.893	152.151	174.476	239.601	197.304
ENSSSCG00000037772	ATP5PB	46.9904	112.345	39.5443	100.952	42.7709	54.2952	47.066	77.3307	48.5383	56.5191	40.1819	34.8329	65.7587	66.397	46.6884
ENSSSCG00000038399	ATP5PF	64.1958	105.574	51.4596	101.666	55.8051	74.4818	60.0992	90.6621	49.2505	79.8708	47.1631	48.4507	80.4778	92.6396	65.6242
ENSSSCG00000012042	ATP5PO	388.766	728.866	336.934	785.64	341.76	538.891	384.288	789.473	314.101	490.079	322.042	419.119	478.44	552.533	345.82
ENSSSCG00000018081	ATP6	19223.9	7882.27	20541.9	14066.8	21797.1	13586.5	20147.9	10701.7	25940.8	15117.8	19734.8	13060	20741.1	15188.1	24481.5
ENSSSCG00000037310	ATP6AP1	41.2894	46.5852	28.8602	33.4137	58.7549	45.1042	63.5892	53.1429	61.5573	40.9328	63.0318	36.7139	213.25	171.048	60.0629
ENSSSCG00000012247	ATP6AP2	32.1893	51.51	27.5957	56.5323	40.0333	45.7135	37.7675	55.2014	45.4241	47.6116	46.3773	36.7018	145.141	135.047	43.0124
ENSSSCG00000017401	ATP6V0A1	2.68694	2.46119	3.15481	3.11048	3.23887	1.98767	0.864913	1.15243	2.02312	1.92252	1.14229	0.580925	18.734	19.702	0.56205
ENSSSCG00000009766	ATP6V0A2	19.8753	12.5911	10.541	12.7177	17.7847	16.1314	14.579	15.744	18.9471	18.9717	14.2377	14.097	15.8143	11.3301	13.7283
ENSSSCG00000039267	ATP6V0B	53.8264	102.677	42.9891	76.8254	41.7932	57.2664	47.9409	77.1145	51.9389	66.742	57.763	65.4787	230.811	217.292	53.4964
ENSSSCG00000002776	ATP6V0D1	42.2968	58.7631	28.8148	47.4831	43.3033	32.3265	43.1952	43.8997	60.5952	38.0809	47.7287	23.5446	84.8028	70.1433	30.2123
ENSSSCG00000011916	ATP6V1A	16.8715	28.4267	11.6313	32.4851	14.9142	10.5796	13.2229	15.3244	22.4469	15.5468	24.2705	10.3596	116.783	75.7135	16.2796
ENSSSCG00000028694	ATP6V1B2	30.2517	33.8346	20.7556	36.5186	34.8917	22.5809	28.4378	27.2282	37.6176	28.2036	34.3703	17.6473	115.303	97.0343	32.6493
ENSSSCG00000006054	ATP6V1C1	27.9949	39.7226	19.5715	34.5577	25.6088	21.8734	17.6932	25.849	24.1742	24.8148	27.436	18.6842	85.9676	95.3433	24.7272
ENSSSCG00000008634	ATP6V1C2	0.997436	1.00114	13.3026	11.7448	0.00387933	0.108254	0.0122141	0.00422539	0.00170735	0.00247515	0.0011845	0.00498369	0.00154798	0.149603	0.264282
ENSSSCG00000033278	ATP6V1D	18.9562	38.6348	18.0431	38.7276	20.5549	16.58	19.07	26.7316	22.3402	21.012	22.007	13.4394	60.0895	54.8401	21.946
ENSSSCG00000016577	ATP6V1F	92.1856	177.264	77.8092	146.547	82.0635	122.011	96.7252	168.679	88.9948	123.096	78.3631	96.6377	167.373	181.154	103.002
ENSSSCG00000032835	ATP6V1G1	2.28472	5.3023	7.06112	5.53867	18.1997	13.7431	13.0616	14.1767	8.30879	5.53037	7.36122	5.12446	17.9482	17.6223	6.07845
ENSSSCG00000006263	ATP6V1H	18.866	30.4242	11.5384	22.4323	22.5238	17.5079	26.1572	26.7385	28.2597	22.3098	23.9159	12.6524	54.4393	46.7313	30.9
ENSSSCG00000012437	ATP7A	4.72153	3.23605	6.12106	4.62847	10.7438	13.9821	3.81957	4.33485	9.05774	11.1408	7.32006	11.9576	6.38299	7.27959	5.32582
ENSSSCG00000018080	ATP8	22509.5	3719.31	33314.3	22596	29262.4	20829	16139.2	11621.8	33464.2	33464.2	36258.8	22251.3	35580.6	24506.5	31979.7
ENSSSCG00000008803	ATP8A1	4.40289	2.48683	12.6277	4.97095	16.6497	19.0224	7.91171	10.5959	13.2514	19.6384	6.22961	12.1938	5.79386	8.38499	29.8186
ENSSSCG00000006550	ATP8B2	21.6354	17.9667	20.4226	14.189	17.9265	18.1096	13.3491	10.3733	19.972	19.4538	34.1911	37.8774	5.01106	3.49271	17.4436
ENSSSCG00000013440	ATP8B3	0.0771588	0.235244	0.167432	0.124117	0.225615	0.193582	0.177059	0.196921	0.223538	0.124938	0.739891	1.17708	0.0348374	0.0745203	0.214061
ENSSSCG00000004646	ATP8B4	0.879606	0.69713	0.20089	0.757582	0.00387933	0.133462	1.20028	1.75238	0.158564	0.395941	0.130052	0.155532	11.2656	15.1356	13.8499
ENSSSCG00000007478	ATP9A	1.2289	0.704722	0.0398949	0.0471032	0.0228789	0.108917	0.28532	0.910963	0.0220118	0.0359345	0.0263826	0.644562	4.70752	2.60492	4.66089
ENSSSCG00000004857	ATP9B	9.71335	8.42691	11.8206	6.28639	15.3934	15.599	10.9492	9.64594	15.4632	16.067	19.8095	20.4387	11.8349	13.8952	10.6643
ENSSSCG00000038657	ATPAF1	12.7868	13.9603	10.6208	16.6383	12.2161	12.2425	12.4311	13.9352	13.9632	12.4158	10.5351	10.0819	11.5341	8.83748	14.9169
ENSSSCG00000028712	ATPAF2	17.8087	27.6826	14.4505	21.5951	19.5361	17.1242	17.7375	25.667	21.3931	16.2043	15.282	12.1866	21.7245	17.8398	15.69
ENSSSCG00000036387	ATPSCKMT	6.17374	18.5501	4.46035	13.1429	5.64163	8.16652	7.19026	9.99676	6.0244	6.78947	7.52943	10.5895	4.05703	5.29457	8.16333
ENSSSCG00000011679	ATR	8.84011	6.26247	13.0027	9.00401	8.75754	8.6054	6.61032	6.68711	7.19905	6.81909	9.07915	11.278	3.3292	3.63569	6.71213
ENSSSCG00000011359	ATRIP	9.35386	5.62371	9.19559	7.52088	7.36339	7.45815	7.00996	5.14301	6.69841	6.41743	7.32828	7.52563	4.28697	5.3183	5.69584
ENSSSCG00000007153	ATRN	2.41783	1.48632	3.60634	2.171	4.06902	3.96887	2.58374	2.03878	3.61253	3.98822	4.70988	4.97934	4.45675	5.11823	3.55229
ENSSSCG00000012434	ATRX	8.43307	4.47017	11.8433	5.98953	21.5498	25.8007	7.03724	6.76479	21.0486	24.1373	18.702	34.1202	8.64947	8.28201	16.7314
ENSSSCG00000001065	ATXN1	2.53425	2.42699	3.28364	3.93915	2.57118	2.81899	1.79395	0.991181	5.25186	5.60773	0.843737	1.43438	4.85624	4.34799	0.789346
ENSSSCG00000024864	ATXN10	38.8782	29.122	34.8469	35.9822	44.9848	35.738	30.5504	22.6544	34.4943	28.3534	26.4858	15.8802	48.8357	36.699	45.9873
ENSSSCG00000038917	ATXN1L	8.34098	4.61959	8.96804	5.70641	7.66538	6.76861	8.54332	6.83388	9.00508	9.53295	10.6016	11.5498	11.7092	10.5951	12.282
ENSSSCG00000009834	ATXN2	11.7015	7.88514	14.5833	8.31775	14.1971	17.2745	10.8788	10.3454	14.2854	17.1495	18.1861	30.3926	15.7495	22.3831	15.8446
ENSSSCG00000021845	ATXN2L	54.4923	36.8628	57.9861	28.5324	63.6681	83.6455	49.945	48.231	76.5172	77.2703	63.6669	95.8951	48.4252	61.8834	68.6145
ENSSSCG00000011493	ATXN7	19.4602	11.2015	26.4156	11.7826	37.591	41.7932	15.9812	12.7666	28.141	34.1504	38.7877	54.9922	14.8803	17.1129	25.0799
ENSSSCG00000015432	ATXN7L1	20.1664	16.9969	21.8219	14.5579	26.6943	29.6618	21.3306	16.7496	40.5569	50.4838	35.3513	44.3843	18.8716	28.6804	40.1747
ENSSSCG00000006828	ATXN7L2	34.1546	7.19693	46.3897	14.7947	21.6953	24.3931	19.5735	13.4233	14.3876	20.2529	28.4574	48.1458	5.83323	8.94215	12.501
ENSSSCG00000017362	ATXN7L3	32.7226	30.0037	34.1891	22.1331	49.8953	42.1108	42.2535	35.7521	52.5211	43.7711	59.0102	54.14	34.3037	33.7271	29.4815
ENSSSCG00000009591	AUH	24.0691	27.2999	26.9685	25.5923	35.1541	32.1018	34.1416	26.8526	32.418	34.0588	50.2338	58.9057	33.2905	33.3778	29.211
ENSSSCG00000008268	AUP1	93.9766	88.1744	81.4061	78.3474	73.6506	94.4844	69.2039	78.3136	71.6299	93.6441	90.0604	115.648	75.0531	86.7859	69.6872
ENSSSCG00000038474	AURKAIP1	36.1444	55.2127	29.8442	49.1002	38.3921	42.7709	41.3901	46.4641	36.8597	40.1589	29.7273	29.0667	33.4967	34.019	40.0317
ENSSSCG00000028924	AURKB	26.1258	14.1764	7.89933	20.2758	2.26212	3.24744	6.49198	5.02246	13.82	7.64662	2.04971	1.95809	1.23734	1.62977	56.6203
ENSSSCG00000034174	AURKC	5.31738	14.9862	3.06532	8.64185	7.46858	6.19714	6.31021	8.04285	3.68291	4.65186	11.7559	9.60851	5.37309	3.13752	13.3743
ENSSSCG00000029474	AVEN	7.2052	13.4368	7.13268	12.3308	14.0434	13.1676	19.2938	18.8217	15.1709	14.8723	15.8644	12.6498	3.59947	3.95636	11.4499
ENSSSCG00000029571	AVIL	4.98886	2.89371	2.86883	2.40367	11.956	9.58514	6.36071	6.24204	15.2407	8.25622	7.28933	6.60639	9.50431	7.841	6.96009
ENSSSCG00000023445	AVL9	8.19038	6.77306	8.93275	6.93418	11.9845	10.4849	8.35735	6.46785	10.5019	10.8907	10.9296	13.579	8.92645	8.87311	12.3154
ENSSSCG00000023204	AXIN1	19.4071	12.312	22.0484	9.66981	19.3932	26.0725	21.154	17.0391	19.3232	22.0678	25.5388	36.5122	12.3405	17.1401	19.0296
ENSSSCG00000017265	AXIN2	0.426695	2.12809	3.64486	1.20218	3.99914	2.93091	1.47948	0.880093	6.92153	6.56785	13.3798	9.73631	0.60018	0.433652	15.6648
ENSSSCG00000038806	AXL	0.0491588	0.0117741	0.00331914	0.00916371	0.0475173	0.00792287	0.00132549	0.00422539	0.00170735	0.00247515	0.0088981	0.00498369	10.3023	13.2167	0.00079626
ENSSSCG00000028258	AZI2	8.52681	9.72981	10.8683	9.19559	12.9582	11.7945	11.8905	12.4232	11.5342	11.754	16.5747	14.0178	10.0329	12.0423	15.94
ENSSSCG00000023873	AZIN1	42.5038	48.0537	37.4788	63.9943	48.533	43.4499	26.6868	39.1486	52.9386	50.7413	47.8259	48.8291	53.4079	69.6544	71.4863
ENSSSCG00000003619	AZIN2	0.0869747	0.339958	0.101216	0.182604	0.461191	0.257793	0.0897347	0.291456	0.203241	0.171611	0.429037	0.305174	5.29257	2.5596	0.222988
ENSSSCG00000013415	AZU1	0.023357	0.0117741	0.00331914	0.00916371	0.00387933	0.00100702	0.00132549	0.00422539	0.00170735	0.00247515	0.0011845	0.00498369	28.7438	13.8021	0.00079626
ENSSSCG00000004687	B2M	3512.89	5857	3782.4	4453.21	5781.17	5624.71	5782.52	5160.5	6050.13	6744.02	5486.37	6027.37	4112.44	4938.42	4434.01
ENSSSCG00000021774	B3GALNT1	10.7188	18.7279	10.5111	20.2654	17.767	20.3155	11.9024	19.9483	13.6918	15.6696	11.2368	8.61236	2.92268	3.16965	20.0811
ENSSSCG00000033692	B3GALNT2	1.86744	3.1575	2.30049	3.29835	3.13697	2.71574	3.29821	4.38791	2.70184	2.52655	3.09838	2.26082	1.23928	0.696967	2.67896
ENSSSCG00000001503	B3GALT4	1.71275	2.64285	1.24122	1.20088	1.32755	1.43632	0.504029	1.09283	1.64019	1.21945	1.25705	0.957073	9.82492	6.45494	2.87759
ENSSSCG00000022151	B3GALT6	4.80292	12.5625	2.96645	6.44341	11.3236	10.0754	9.96023	12.8544	7.78728	5.01323	9.88466	5.79227	15.0988	12.812	8.67766
ENSSSCG00000020809	B3GAT3	68.119	32.5569	74.2453	33.8071	33.1475	42.6451	36.7728	35.425	25.1423	36.2053	52.5766	81.4245	43.3746	46.1883	43.7639
ENSSSCG00000009335	B3GLCT	4.05707	12.2635	2.26034	3.69536	16.2402	14.5501	10.8122	12.3071	14.5181	14.3025	20.8893	19.8772	12.2849	10.7211	22.3648
ENSSSCG00000008374	B3GNT2	9.82631	21.9544	17.8457	34.1513	18.932	17.4916	27.8385	42.693	19.0202	16.8912	14.795	17.0258	24.7205	18.7316	3.79794
ENSSSCG00000013886	B3GNT3	16.0322	27.2624	5.96729	9.99699	6.65089	5.16586	11.2096	9.9669	14.5735	9.06953	24.1993	12.604	75.788	56.5916	19.9729
ENSSSCG00000024393	B3GNT5	1.9406	1.78179	6.0685	4.63172	0.320665	0.711231	0.351974	0.402851	0.532195	0.685463	1.60238	2.65954	4.2078	3.59525	1.33636
ENSSSCG00000033015	B3GNT7	0.216922	0.262941	0.231856	0.157131	0.163201	0.184312	0.447145	0.116861	0.10817	0.16892	0.0574525	0.165466	0.0542738	0.132984	11.9032
ENSSSCG00000040139	B3GNT9	5.38413	7.74908	2.56931	5.52783	2.31928	1.45202	3.86082	3.87201	5.75534	3.43688	6.80929	3.44963	2.95793	1.29237	7.52458
ENSSSCG00000027229	B3GNTL1	11.4191	10.1504	11.2643	6.17806	15.9752	17.7052	16.3597	16.1411	13.9542	15.032	9.43007	12.6944	16.4516	13.2945	11.5038
ENSSSCG00000000433	B4GALNT1	0.254328	0.218947	0.0701648	0.00916371	5.90388	4.53889	0.779456	0.44205	17.9261	15.3306	2.04474	1.68264	30.9293	32.2718	0.550697
ENSSSCG00000035454	B4GALT1	45.1249	25.5472	28.6412	29.3435	37.2865	19.9021	44.2377	25.5767	53.5503	27.9132	22.5458	11.1428	36.2377	34.8238	27.4221
ENSSSCG00000026793	B4GALT2	11.822	8.01006	10.0557	11.122	5.62843	5.05409	8.26246	9.67629	8.46275	7.463	8.3441	7.26567	11.9614	10.6312	12.7455
ENSSSCG00000006360	B4GALT3	11.4692	16.1638	8.39668	10.6598	7.79395	9.35777	10.6248	9.74909	10.1966	10.0355	15.1642	15.6717	9.33992	7.7928	9.02695
ENSSSCG00000011903	B4GALT4	6.79633	9.16346	7.06878	9.80729	4.80756	5.78047	6.76206	8.0407	5.52199	4.14298	6.01359	5.4001	11.4048	10.0223	6.49895
ENSSSCG00000007465	B4GALT5	24.0351	13.5455	42.7243	15.7279	27.4139	28.8487	18.3766	12.8364	29.8283	39.4549	38.2701	45.074	28.4196	29.5837	22.042
ENSSSCG00000025005	B4GALT6	28.9133	6.14258	35.0959	16.4157	0.281919	0.266573	0.361129	0.00422539	0.800692	0.870111	0.0628411	0.277095	1.60471	2.13496	0.614842
ENSSSCG00000014035	B4GALT7	1.72106	2.15803	3.9558	1.83106	2.58589	3.4144	3.08293	2.33704	2.29563	3.07811	3.87257	5.16374	1.97487	2.81621	2.72875
ENSSSCG00000012940	B4GAT1	2.08156	5.707	2.16406	4.66207	3.53597	2.23801	6.268	4.75684	3.14801	2.30666	3.89437	2.11516	4.42928	2.40201	3.52908
ENSSSCG00000039681	B9D1	1.66523	5.4419	2.84301	4.49064	2.06966	2.57969	2.03076	4.04345	1.80768	1.86221	1.19464	1.18879	2.90979	3.48335	1.20218
ENSSSCG00000003013	B9D2	11.2516	26.9558	11.9501	27.6378	7.87649	9.58888	7.5843	14.032	9.12616	9.77319	6.32782	7.4171	29.1564	30.2515	5.71585
ENSSSCG00000031073	BABAM1	44.5974	43.9179	41.6066	39.3315	37.5245	35.761	37.8868	37.863	41.035	37.8869	39.0112	37.2946	39.6965	38.4809	37.4493
ENSSSCG00000026465	BABAM2	78.0434	80.8341	54.8648	67.6446	53.8428	39.8946	54.9811	56.7228	67.5252	53.0351	59.6708	45.9342	68.9507	59.8362	63.2259
ENSSSCG00000015079	BACE1	0.251939	0.169726	0.0209366	0.116549	0.00387933	0.00100702	0.00675362	0.00422539	0.00170735	0.0318754	0.0105664	0.00498369	1.22015	1.11844	0.0406364
ENSSSCG00000012029	BACH1	3.77379	2.92262	5.85015	3.91205	6.73604	6.00773	3.5094	3.50336	9.26105	7.39435	4.74913	6.318	37.4972	40.9888	10.026
ENSSSCG00000004332	BACH2	2.18025	6.2247	24.6145	7.82759	15.3823	16.8258	5.11491	6.90931	5.54579	6.28272	20.6428	32.6801	0.577665	0.315898	1.96011
ENSSSCG00000013033	BAD	40.8934	45.518	46.4043	42.7243	16.4577	23.1859	26.6716	31.1746	21.0176	19.98	24.7198	25.828	54.7979	50.9354	25.1941
ENSSSCG00000010996	BAG1	55.3011	87.3042	50.566	63.651	76.7105	95.609	76.02	87.7912	80.4491	89.3965	79.0376	79.2184	52.9541	44.6501	83.1661
ENSSSCG00000033526	BAG2	2.06253	4.76443	0.814041	2.32229	0.311292	0.193226	0.450609	0.169249	0.611014	0.333174	0.122524	0.205666	5.38496	5.72039	2.38564
ENSSSCG00000010686	BAG3	2.01208	1.26476	0.993025	0.887455	1.61846	1.4091	3.88254	2.21222	5.71089	3.82083	2.49759	1.15678	9.78412	10.1036	6.90067
ENSSSCG00000034468	BAG4	4.51363	6.78944	5.0663	6.65468	15.2871	12.2806	6.41078	6.03293	13.8237	9.32803	20.142	13.6234	3.70396	2.96278	5.81814
ENSSSCG00000037197	BAG5	7.38685	8.90736	7.59716	9.45785	15.88	16.665	14.7734	13.7987	23.2838	17.9767	9.20817	9.82162	11.9429	10.7699	15.1915
ENSSSCG00000001410	BAG6	68.9807	49.5704	64.2459	37.3698	66.8393	66.9645	59.8313	52.9827	68.8976	53.8547	73.78	82.7545	50.6253	54.084	75.7621
ENSSSCG00000004772	BAHD1	12.5868	9.50883	12.4586	7.53673	15.2636	15.7243	14.484	9.71857	16.5427	17.8271	16.4357	17.7073	10.4303	10.0605	16.2547
ENSSSCG00000017142	BAIAP2	4.12627	1.08592	1.42645	1.10348	0.811817	1.17875	0.286208	0.225352	0.399945	0.274473	0.457253	0.858408	6.40085	11.7515	0.620178
ENSSSCG00000007602	BAIAP2L1	0.950911	2.39233	0.406927	1.29184	5.33915	5.22991	4.94596	9.40347	6.18936	5.89251	1.12517	1.95426	0.541663	0.540639	36.3204
ENSSSCG00000000111	BAIAP2L2	4.82058	0.19305	0.0853121	0.20089	1.6862	1.02116	0.552347	0.917666	0.657201	0.627741	0.619876	0.719893	0.089348	0.0931998	1.61326
ENSSSCG00000008029	BAIAP3	4.52727	1.23978	8.78749	3.6113	0.655586	0.767275	1.30085	1.27083	0.871228	1.38606	0.84799	1.08416	1.25783	2.18416	1.40995
ENSSSCG00000011014	BAMBI	0.2919	0.882227	0.122237	0.352256	2.53497	9.14906	3.0763	5.43906	0.86479	6.40218	0.172577	0.977107	0.977769	4.29941	2.61042
ENSSSCG00000022361	BANK1	114.966	66.0693	147.13	114.527	0.174068	0.908646	0.869241	1.95656	0.126779	0.307812	0.164365	0.624876	114.103	142.286	5.92518
ENSSSCG00000020678	BANP	11.0156	12.1042	9.23693	6.29754	14.4813	13.9769	12.6277	12.6116	15.0894	11.7878	19.9326	21.3258	8.18793	8.22071	15.3249
ENSSSCG00000011438	BAP1	40.4605	29.254	37.5521	24.8703	40.4891	41.3844	37.1297	34.1416	40.0276	36.5423	50.7431	51.6952	32.3449	34.9174	43.7431
ENSSSCG00000016170	BARD1	3.60973	2.47883	2.06305	3.06167	2.14727	2.01342	1.40524	1.30915	3.44174	3.09775	2.22882	2.15117	0.447947	0.595724	7.12169
ENSSSCG00000023178	BATF2	0.0519613	0.379064	0.0473218	0.00916371	0.0573861	0.00100702	0.0466146	0.119301	0.00170735	0.00247515	0.115627	0.00498369	7.62003	8.04701	0.11103
ENSSSCG00000026587	BATF3	25.1095	19.2442	1.14581	0.657958	1.33188	1.22852	4.23906	5.37119	4.54358	8.92733	2.707	2.02344	11.948	15.3038	1.11863
ENSSSCG00000001958	BAZ1A	29.574	10.5411	27.1348	14.6898	26.2793	24.0179	11.2567	7.09785	27.4371	30.5215	17.5105	19.609	35.3495	41.6196	16.9406
ENSSSCG00000027342	BAZ1B	29.5111	14.0942	26.3789	13.9326	33.7547	30.5734	24.5096	14.8387	37.7732	35.591	36.4559	38.9345	16.9105	16.0273	44.5717
ENSSSCG00000000403	BAZ2A	25.2561	12.5194	36.7351	14.0025	30.4062	37.5245	18.9376	16.4297	34.2398	35.7919	29.9425	43.7814	28.7056	38.0967	25.3459
ENSSSCG00000015882	BAZ2B	2.69504	0.538275	3.64159	1.10501	4.17237	5.73172	1.74693	0.860727	1.5617	3.37111	5.63575	9.71831	4.92964	8.76629	4.45706
ENSSSCG00000013337	BBOX1	9.33317	4.54588	20.1234	18.3197	0.00387933	0.160055	0.107765	0.38801	0.0131029	0.288536	0.0011845	0.0451351	0.0863587	0.0023305	0.897045
ENSSSCG00000000523	BBS10	1.44028	1.10839	1.55084	3.18198	1.63364	1.19386	1.09961	2.56927	1.09835	2.12495	1.25196	1.4225	0.815216	0.446662	1.15517
ENSSSCG00000025417	BBS2	4.1697	2.6745	2.73768	3.38659	3.12965	3.31758	3.04099	2.16617	2.11444	2.04797	2.84951	2.98012	3.00844	2.82207	2.63451
ENSSSCG00000009093	BBS7	20.9832	12.8876	29.1445	24.1252	14.4435	13.0593	7.67922	10.7153	11.6383	10.9059	15.9975	22.3767	1.01527	1.39535	22.2685
ENSSSCG00000024754	BBS9	0.618445	0.783406	1.38212	1.70794	1.43356	2.09065	1.05167	1.27222	0.910619	0.978406	1.7242	2.50497	1.56479	1.94751	1.39679
ENSSSCG00000011943	BBX	8.70359	4.98679	13.0185	5.57809	11.0413	11.6243	4.93592	4.20842	11.647	12.2566	12.5182	18.7616	12.8606	13.3344	11.926
ENSSSCG00000022869	BCAP29	21.6044	41.4151	20.9478	31.7809	33.9171	48.8191	33.1813	45.7926	51.7976	74.9466	37.2675	48.551	55.1382	62.6393	49.2966
ENSSSCG00000012772	BCAP31	86.7516	168.732	70.9964	113.806	94.9851	118.004	135.525	142.259	104.063	109.367	163.052	133.582	174.061	164.704	140.535
ENSSSCG00000006893	BCAR3	1.3613	2.74097	2.53964	2.07697	0.120874	0.0230822	0.303404	0.102971	0.872437	0.685922	5.97074	2.35195	2.13496	1.87787	0.512092
ENSSSCG00000007485	BCAS1	0.69642	4.14054	2.3373	5.55203	1.40642	2.57378	2.53143	5.35831	0.854146	2.76654	1.75266	4.3031	0.0753007	0.0023305	0.343517
ENSSSCG00000017676	BCAS3	5.16165	10.5089	6.15923	7.4348	10.3234	5.97364	11.1239	10.5368	13.5782	10.209	13.9956	12.619	8.00753	7.91007	13.5714
ENSSSCG00000007472	BCAS4	15.9896	52.4687	40.2638	92.6953	32.9972	48.3122	59.2727	113.458	51.7772	51.7551	4.94742	7.2577	2.00544	1.95372	17.5631
ENSSSCG00000029163	BCAT1	11.2923	17.8797	9.58783	17.4718	14.0295	8.84229	8.86626	6.96116	22.7712	15.8886	32.6627	29.332	44.7774	27.8332	11.4615
ENSSSCG00000003139	BCAT2	44.0648	38.2878	41.3948	35.9702	42.4481	49.2583	48.3168	43.837	31.2936	44.5054	54.3219	61.547	58.6917	61.084	49.5352
ENSSSCG00000010743	BCCIP	70.9477	84.7166	64.96	75.5227	76.6838	73.5769	77.5667	67.1011	75.9561	82.5349	77.8652	72.9276	50.0675	52.8875	83.4918
ENSSSCG00000040144	BCDIN3D	3.4294	4.50426	2.98023	5.30253	5.11164	3.40189	3.97761	4.07237	3.70968	4.70483	4.41146	3.95265	3.34054	2.47241	3.19354
ENSSSCG00000004465	BCKDHB	11.9362	19.9048	8.22247	23.2998	17.4414	16.8558	16.7496	21.548	20.9938	19.6825	20.574	13.4284	14.993	14.5625	28.6706
ENSSSCG00000007763	BCKDK	24.642	30.6908	16.5531	25.945	34.1357	24.8493	33.8299	33.2333	31.2073	19.0775	27.9532	21.9861	34.4566	32.5383	32.7065
ENSSSCG00000025691	BCL10	51.4347	41.3894	83.7257	51.3813	68.0732	53.6034	54.7734	39.7616	71.7553	64.8132	64.2162	65.2738	47.0286	41.0946	84.0655
ENSSSCG00000008392	BCL11A	46.6743	22.973	63.651	39.7009	0.44718	0.39977	0.33015	0.52478	0.099702	0.159525	0.135107	0.259672	38.8068	33.6413	1.9858
ENSSSCG00000002507	BCL11B	4.15493	7.8223	0.155556	0.00916371	49.2202	51.4196	14.2879	17.5952	33.3641	32.9137	24.3755	32.9312	0.00154798	0.130492	15.1436
ENSSSCG00000040010	BCL2A1	4.43436	11.9081	8.01884	22.2699	5.12497	10.4222	6.53311	17.256	4.47692	6.02989	1.84417	3.03936	5.69397	7.954	0.777736
ENSSSCG00000035357	BCL2L1	16.6664	15.0262	4.32523	7.27951	14.0944	10.0161	24.396	16.9231	33.7679	22.3542	17.9685	8.35048	17.532	15.485	87.6722
ENSSSCG00000003177	BCL2L12	17.5839	31.6235	12.4518	31.6165	12.1086	9.88896	16.1961	24.5422	11.7878	18.9991	10.1537	7.71121	22.1066	21.8676	9.97025
ENSSSCG00000040373	BCL2L13	7.9762	13.6377	8.28965	10.7059	11.1104	11.1529	6.08868	7.59768	12.2608	10.3642	10.0852	10.9789	15.6378	15.2911	10.1662
ENSSSCG00000000623	BCL2L14	0.531695	0.981346	0.203643	0.278013	1.0742	0.569627	0.345114	1.18903	0.334308	0.325507	0.580925	0.378753	12.7062	15.0988	0.0501883
ENSSSCG00000038970	BCL2L15	4.13044	0.850505	4.23486	2.62303	4.91379	4.74401	4.93933	3.08927	3.6332	4.05821	5.12446	6.02296	16.7935	12.0357	4.07374
ENSSSCG00000027426	BCL3	9.12786	15.1877	8.98242	7.36462	35.6328	34.8747	20.8132	22.0077	25.3584	13.3878	27.904	25.5727	49.5815	61.1383	9.52498
ENSSSCG00000011810	BCL6	7.69189	3.93937	5.18468	2.70626	4.31466	3.36746	4.65481	4.08874	8.62631	3.90752	3.53965	2.81285	31.0591	27.3568	35.9064
ENSSSCG00000009801	BCL7A	9.61453	5.52953	3.13789	3.75464	12.3801	10.9667	9.52113	9.43569	8.52527	6.01062	9.19872	6.79451	0.386116	0.345625	20.4087
ENSSSCG00000007708	BCL7B	19.8263	24.2983	16.7676	18.4203	21.6665	20.5145	28.9198	25.8826	24.2061	22.394	28.7158	26.8381	12.3531	11.4141	21.1903
ENSSSCG00000007776	BCL7C	67.8261	147.433	66.1226	97.12	69.2202	84.6737	87.9329	109.821	72.4383	76.6489	84.7632	88.4539	66.9449	63.5624	85.3041
ENSSSCG00000006698	BCL9	3.83854	5.59756	4.67678	2.65866	11.4184	11.2984	12.7979	10.7869	5.51595	5.56519	17.7352	17.3131	2.03727	3.01157	4.1848
ENSSSCG00000015099	BCL9L	8.16131	16.4781	11.455	7.12256	36.5056	36.1935	30.8988	27.5718	50.7955	36.6151	43.6898	51.9896	6.55971	5.85982	26.3244
ENSSSCG00000004163	BCLAF1	98.1322	30.6386	114.764	46.6115	108.104	109.258	61.778	41.14	87.4035	129.568	112.776	184.933	64.5152	92.4807	103.426
ENSSSCG00000023334	BCLAF3	5.43818	1.47722	10.9902	4.20502	6.95574	12.138	1.10462	2.60159	4.41616	8.23249	5.03624	14.3986	4.41253	7.11614	2.73768
ENSSSCG00000012655	BCORL1	0.564229	0.930393	1.10348	0.875161	1.55423	0.911795	1.69289	1.3032	1.97066	1.5617	4.88732	3.82598	1.81272	2.37158	1.49096
ENSSSCG00000010052	BCR	0.22745	0.464837	0.542666	0.661894	1.11484	1.12093	0.858778	1.19765	1.42988	1.58065	0.172314	0.429037	0.764996	0.904368	2.3155
ENSSSCG00000035775	BCS1L	1.29472	2.05118	1.5998	2.77603	2.32935	1.4222	1.93468	2.02715	1.31553	0.96786	1.30449	1.65163	1.69084	1.70667	1.14174
ENSSSCG00000024109	BDH1	13.8842	22.1785	12.4628	15.2845	19.3047	11.9902	17.8856	15.0583	26.9356	15.1468	34.4999	13.8838	11.5978	7.27159	16.7844
ENSSSCG00000022282	BDH2	22.4709	39.6925	17.0058	32.0243	41.2154	41.5721	28.1156	47.2749	25.7322	34.6041	31.3853	36.5514	28.8917	29.2613	21.5059
ENSSSCG00000016968	BDP1	4.73624	2.00719	8.50055	3.83753	7.8063	8.3531	2.69678	1.71838	7.37349	9.0805	7.03935	12.2263	4.54219	5.77516	5.93502
ENSSSCG00000017386	BECN1	28.5768	33.9851	27.3595	31.8369	25.2417	24.9263	22.4604	24.373	26.2846	26.4337	27.4518	27.9878	25.6308	23.6585	32.4012
ENSSSCG00000036589	BEGAIN	0.0962795	1.08102	0.100749	0.151718	3.17217	2.52498	0.646444	0.738761	4.19459	3.73607	7.33031	4.96243	0.00154798	0.0023305	0.0873164
ENSSSCG00000031159	BEND3	0.848916	0.661028	1.30435	1.53961	1.45631	0.594639	1.30739	0.684333	1.21469	0.812867	1.69365	0.906513	0.626562	0.282945	1.54233
ENSSSCG00000036385	BET1	17.2703	34.7558	10.6014	36.6064	12.8664	12.1178	15.2391	25.8256	11.4581	13.1203	13.8149	11.9668	17.6418	12.6699	12.9971
ENSSSCG00000012525	BEX1	14.7438	4.35019	0.243539	0.567688	1.87119	2.50385	2.71402	5.45105	1.68991	0.0890213	2.34563	1.06115	4.64215	2.85241	10.1287
ENSSSCG00000012525	BEX1	14.7438	4.35019	0.243539	0.567688	1.87119	2.50385	2.71402	5.45105	1.68991	0.0890213	2.34563	1.06115	4.64215	2.85241	10.1287
ENSSSCG00000012528	BEX3	22.1785	12.5574	0.0693215	0.381774	13.5956	27.0234	16.4231	31.6918	4.88616	2.55745	8.4726	7.93754	1.12818	0.66852	28.7731
ENSSSCG00000022635	BEX4	7.22674	6.14722	0.362024	0.00916371	2.15602	2.83994	1.91607	2.07234	0.933704	1.02001	10.2065	5.40785	2.00256	1.47555	6.02774
ENSSSCG00000037673	BFAR	8.16484	13.8188	9.16822	9.78935	15.6794	12.7954	16.1237	13.0271	18.3994	16.0991	23.1727	21.9238	9.99534	7.74954	15.5584
ENSSSCG00000006493	BGLAP	4.66744	1.15856	4.39402	4.82471	4.29629	6.68177	3.25272	2.87058	3.54949	6.25108	3.24368	6.49597	0.208248	0.72768	5.49619
ENSSSCG00000038489	BHLHA15	11.0897	16.2523	9.65588	13.3238	0.033585	0.13025	0.0650789	0.330966	0.00170735	0.00247515	0.0163301	0.0364233	6.16068	4.90129	4.68169
ENSSSCG00000036136	BHLHE40	11.585	8.87833	5.26602	3.64725	0.789134	1.62244	10.1142	4.67244	5.05489	13.2306	1.48588	1.32548	7.50713	13.2566	42.9857
ENSSSCG00000028552	BHLHE41	35.589	22.8613	45.9811	47.4363	0.16979	0.0794939	0.468016	0.489131	0.254332	0.0340233	0.11484	0.12697	0.691498	0.472288	3.39804
ENSSSCG00000010204	BICC1	0.116771	0.215895	0.551064	0.158019	0.469738	0.145731	0.255738	0.162087	1.39107	1.40906	0.018929	0.0602899	0.205175	0.200129	0.056631
ENSSSCG00000000531	BICD1	0.0304252	0.11312	0.0179451	0.00916371	0.351206	0.464014	0.24537	0.104363	1.80014	1.80189	0.61179	0.305613	0.00154798	0.036329	0.116329
ENSSSCG00000027166	BICD2	14.8787	8.51215	11.5024	8.85083	14.0453	10.9791	15.8883	8.31501	16.7548	13.5442	18.3815	12.8905	18.2229	14.723	20.0115
ENSSSCG00000009896	BICDL1	1.77195	3.1729	3.74449	2.46386	11.1169	7.68989	11.0484	10.1361	12.6178	10.2589	8.48777	6.70229	0.113211	0.129439	3.44077
ENSSSCG00000022302	BICRA	4.10807	4.04522	6.32356	2.84301	6.14365	9.86228	3.97372	5.31829	9.27795	8.62108	7.90919	10.9092	5.61892	9.80673	5.99426
ENSSSCG00000001646	BICRAL	6.07384	5.09687	8.53415	4.87882	12.2255	12.1014	8.74498	8.23331	11.4076	11.1167	12.2764	13.05	5.53052	6.37689	12.1335
ENSSSCG00000000769	BID	50.0266	68.5058	50.8037	71.403	58.8043	69.7973	42.0274	51.3923	48.7964	53.9552	43.2017	46.1157	50.108	60.7657	55.2547
ENSSSCG00000015720	BIN1	121.944	79.7331	101.52	58.0406	116.718	75.1973	142.489	92.9201	112.765	95.968	125.079	129.145	21.4627	24.6218	221.451
ENSSSCG00000000223	BIN2	69.7696	102.175	91.5887	51.968	326.21	231.904	308.22	178.079	354.556	271.148	437.127	362.986	219.24	218.878	290.252
ENSSSCG00000009629	BIN3	8.95407	7.40315	11.628	6.67325	12.787	12.8664	10.6195	10.389	14.3062	17.1146	12.1278	17.6135	14.0916	14.8691	10.5651
ENSSSCG00000027529	BIRC3	257.6	124.752	289.81	167.581	212.899	213.66	127.705	107.018	240.421	266.631	338.783	366.656	91.9694	127.266	101.105
ENSSSCG00000040486	BIRC5	39.9893	59.0968	17.741	58.5728	11.4805	15.0163	18.7131	19.1861	26.6057	30.9403	5.45319	3.53479	1.07433	1.15719	89.1779
ENSSSCG00000008513	BIRC6	12.7959	4.85553	17.3358	7.21248	18.9029	22.1109	8.79383	8.33465	19.0648	24.0109	18.6092	29.663	8.52816	9.45358	12.8957
ENSSSCG00000027568	BLK	76.6392	174.042	96.1952	59.7405	7.28005	7.21971	14.4156	11.5271	2.20828	2.07686	912.622	732.221	2.48446	1.7407	54.0997
ENSSSCG00000001816	BLM	4.34554	1.61945	3.57007	3.13097	3.19031	2.53497	1.20774	0.94993	2.97891	2.81507	1.63966	2.27793	1.19153	1.00361	5.48247
ENSSSCG00000017796	BLMH	26.1453	38.3232	10.4503	25.8837	29.8892	21.0739	47.8395	43.2652	43.223	34.3149	39.6092	23.2612	41.4585	38.7657	56.4438
ENSSSCG00000010504	BLNK	74.9854	38.4391	87.4263	61.0426	0.0578438	0.893118	0.473665	0.806853	0.208269	0.403486	0.27946	0.244445	176.022	127.971	4.99024
ENSSSCG00000000359	BLOC1S1	53.1588	82.7255	40.3382	62.0329	52.1576	64.9497	50.7536	67.5662	61.1004	56.8244	37.2254	44.9967	89.7402	79.6889	32.5712
ENSSSCG00000010551	BLOC1S2	54.4394	70.1838	64.4297	62.9495	60.9949	73.623	52.8431	65.9399	62.9548	70.5051	46.447	57.6952	51.4181	56.2614	58.1337
ENSSSCG00000030673	BLOC1S4	22.9413	32.6194	13.3286	27.2596	28.4557	19.311	24.2731	33.5485	28.9458	13.4988	26.6231	14.5465	33.5919	20.5646	32.5391
ENSSSCG00000040593	BLOC1S5	17.0858	17.9866	14.6019	17.9614	19.5692	10.3851	17.3804	13.4752	19.1347	11.05	19.0679	8.29868	14.9327	10.1246	17.2601
ENSSSCG00000040593	BLOC1S5	17.0858	17.9866	14.6019	17.9614	19.5692	10.3851	17.3804	13.4752	19.1347	11.05	19.0679	8.29868	14.9327	10.1246	17.2601
ENSSSCG00000037384	BLOC1S6	21.4462	24.8608	18.0277	22.5092	37.8361	25.9312	26.5938	29.1043	34.1605	23.8653	29.1103	18.5266	51.7044	36.3802	32.0284
ENSSSCG00000016756	BLVRA	8.77454	11.1785	0.232932	0.451006	9.54083	12.2868	10.3765	15.4741	8.48526	6.99392	9.50542	7.99409	85.8127	72.2331	8.2096
ENSSSCG00000021067	BLVRB	3.29209	3.64199	1.22511	2.60121	1.94617	3.03464	6.19272	6.84909	3.1543	4.1271	0.954652	1.19305	21.202	21.0165	8.18321
ENSSSCG00000022396	BLZF1	12.6593	16.637	12.6555	18.0277	15.8572	17.8935	11.3389	17.3238	15.8447	20.013	14.0597	22.679	16.2701	18.3792	14.8671
ENSSSCG00000032956	BMERB1	0.37374	6.07119	0.364406	0.0619549	1.00424	0.622646	0.738761	0.718821	1.0069	0.863976	9.68633	10.9123	0.344481	0.0023305	0.536473
ENSSSCG00000035284	BMF	20.1369	14.4287	24.4745	20.7556	10.955	9.81499	16.2185	11.9922	9.10957	7.23331	10.8578	7.3239	52.1033	41.3374	10.5179
ENSSSCG00000009620	BMP1	0.892029	0.116771	0.0882653	0.0897725	0.288081	0.255535	0.164712	0.178621	0.257545	0.377132	0.389861	0.406754	0.15582	0.262543	1.62325
ENSSSCG00000027722	BMP2K	11.3187	7.36714	22.1504	15.5971	9.51971	11.3633	6.40877	6.08203	8.09794	8.16636	10.1693	13.1672	32.6107	38.1066	6.80712
ENSSSCG00000005045	BMP4	1.71525	0.345246	3.27538	1.96024	1.93988	2.66574	1.45058	1.19908	1.00527	0.98791	2.8858	4.11731	0.52226	0.878319	1.32107
ENSSSCG00000010360	BMPR1A	0.775327	0.751029	1.65359	1.21537	0.273693	0.178905	0.520612	0.103242	0.272291	0.240611	0.731873	1.29937	0.741928	0.547304	2.33263
ENSSSCG00000016113	BMPR2	1.50028	1.75999	1.73427	1.04452	6.32701	4.09898	2.95148	2.80081	4.97283	3.38331	7.92167	7.55505	10.9131	9.05195	10.0226
ENSSSCG00000010198	BMS1	17.4304	9.67865	15.0597	11.7245	19.2757	14.6176	15.4215	10.4372	17.3388	15.7008	16.6663	13.9349	11.8673	12.3809	16.0327
ENSSSCG00000021466	BMT2	8.86062	11.6489	9.87436	13.7272	8.86066	10.2208	5.36424	6.02461	6.38952	8.79305	10.1816	11.2568	30.5372	32.795	8.76787
ENSSSCG00000012137	BMX	0.52451	0.136561	0.874252	1.29327	0.435262	0.429489	0.217286	0.214582	0.39044	0.69879	0.507251	0.549872	21.4999	22.2522	0.305358
ENSSSCG00000016985	BNIP1	9.34647	14.9151	9.47731	14.4188	9.18877	10.946	9.78953	13.594	7.64328	10.9799	7.58325	8.82183	6.92164	6.69718	5.26557
ENSSSCG00000004582	BNIP2	9.86404	13.2978	9.54793	14.7002	11.9645	11.9521	11.0157	10.7066	17.1696	19.1149	15.2303	15.8998	17.5855	17.6484	13.8694
ENSSSCG00000024388	BNIP3	32.5209	33.2221	29.9202	29.2843	39.4562	38.9626	53.0326	44.832	40.4848	40.5843	50.9668	44.2556	74.7245	85.6129	57.4233
ENSSSCG00000009658	BNIP3L	54.1695	59.9984	20.3835	49.4969	45.7135	35.2079	27.7563	43.6656	63.4646	32.4026	53.6131	31.7446	171.048	90.5754	98.9163
ENSSSCG00000008735	BOD1L1	4.54862	1.70043	6.51763	2.47863	6.88328	5.30202	4.52775	2.16386	6.86997	6.54524	7.85705	8.792	3.34318	3.92126	5.55653
ENSSSCG00000006667	BOLA1	8.01755	33.7122	6.98408	21.8522	10.0161	13.1247	10.0081	27.6455	10.9897	9.25777	8.88598	6.87488	12.1356	10.6142	9.17146
ENSSSCG00000025120	BORA	7.64628	7.07434	6.13646	10.683	4.90495	10.5646	4.11343	5.95897	5.86861	11.0739	3.55618	9.58519	5.05881	16.9874	13.0641
ENSSSCG00000032804	BORCS5	16.2523	23.4047	14.8955	24.0381	15.2555	20.8696	15.3825	23.8947	22.9023	18.5548	17.0404	16.0709	36.7205	37.3286	17.047
ENSSSCG00000028788	BORCS6	8.30011	19.1849	5.49291	14.1163	11.5785	6.10411	11.6556	8.3297	16.3435	5.63183	12.0597	5.52907	18.147	9.39211	17.6007
ENSSSCG00000039425	BPGM	13.4555	14.1961	12.1918	17.2266	18.7943	15.4471	18.7208	18.7734	70.0416	75.7377	9.09111	8.38972	6.54435	7.28458	9.99791
ENSSSCG00000001008	BPHL	59.3003	49.0056	54.3351	51.6162	32.4358	31.7857	52.2099	49.6255	29.3359	26.8897	38.192	41.5533	23.3706	18.4548	55.0611
ENSSSCG00000026605	BPI	0.352956	3.02348	0.0323116	0.00916371	2.44186	1.45731	3.55763	5.07502	0.392672	0.0974932	2.73358	1.92287	0.338553	0.262033	13.7874
ENSSSCG00000029295	BPIFB4	0.0188864	7.27604	0.00331914	0.00916371	0.976139	0.465796	0.136708	0.237877	1.34033	0.522874	27.0271	9.69296	0.00154798	0.0023305	0.0486997
ENSSSCG00000000157	BPIFC	0.354139	0.464837	1.44035	0.486732	1.83918	1.94757	1.16149	0.918501	0.94533	1.30168	0.967823	1.55254	0.15222	0.607125	0.34472
ENSSSCG00000010822	BPNT1	43.4643	62.5311	35.5583	58.9908	50.6037	57.8884	37.5548	50.2588	35.4196	53.8866	38.6695	35.9326	23.4504	21.0103	27.0638
ENSSSCG00000033528	BPTF	11.3366	4.81099	17.4912	6.78619	23.0097	26.4542	11.8017	9.84947	21.9282	29.4634	24.034	42.6429	9.7513	13.2741	21.3057
ENSSSCG00000016494	BRAF	7.5941	5.27133	11.6585	7.39374	11.463	15.0492	6.81442	7.06281	9.12127	12.7063	11.4872	20.6012	5.98104	6.50893	9.11758
ENSSSCG00000040595	BRAP	12.2169	6.18466	13.1634	9.08749	12.9367	14.141	12.2347	9.21132	13.289	16.0837	15.8024	17.4173	9.24029	11.9263	11.1861
ENSSSCG00000007563	BRAT1	12.1477	7.71261	10.796	7.96885	11.4444	16.4309	12.5322	12.9024	11.4473	14.899	11.4967	14.4493	5.23692	5.88339	9.2287
ENSSSCG00000022101	BRCA1	5.90096	2.31322	4.00141	5.01201	3.61988	2.19257	3.3505	2.54972	3.91336	3.38811	5.08627	4.16237	1.91559	1.27581	10.3926
ENSSSCG00000012813	BRCC3	13.2226	21.6476	12.3848	14.3023	28.2568	27.5371	12.062	17.4057	22.6985	25.9717	27.926	30.4052	27.7052	31.6641	16.247
ENSSSCG00000032820	BRD1	21.6218	13.5566	19.965	11.5927	19.2708	17.2071	22.2255	15.3565	21.3123	19.0486	30.6667	27.926	14.866	13.8713	22.5713
ENSSSCG00000001471	BRD2	128.399	52.6639	227.375	55.4733	124.368	219.012	109.966	64.0029	126.913	248.263	152.038	281.718	115.146	225.333	153.648
ENSSSCG00000005749	BRD3	12.6903	7.38151	15.1139	6.78223	18.7713	17.2006	11.7604	7.44714	15.8237	13.1004	19.6056	20.8893	23.1054	22.1604	13.8672
ENSSSCG00000022227	BRD4	22.1534	26.2065	33.2995	17.5423	38.7403	37.0054	21.1039	22.6087	43.8729	37.4445	37.4304	43.6611	28.4536	34.3196	40.9731
ENSSSCG00000021644	BRD7	86.2082	33.9666	65.8227	38.963	87.429	84.7198	65.5892	43.8836	71.3526	70.5506	67.6317	63.2543	55.0805	59.2713	74.4333
ENSSSCG00000014327	BRD8	28.0609	14.0626	32.5801	14.5723	28.1364	34.7705	22.6889	16.5296	23.5098	33.3001	34.9782	49.1381	16.7138	23.157	31.2521
ENSSSCG00000035118	BRD9	57.3152	26.0012	67.9496	33.3784	29.9962	31.9178	31.7974	21.4241	30.2426	31.5024	36.1315	44.1676	22.7082	28.0701	28.01
ENSSSCG00000031710	BRF1	8.63154	6.06448	10.1474	5.89982	10.4027	13.8022	10.7634	8.6673	9.6895	12.2513	11.9509	16.3122	5.45917	7.8938	9.24433
ENSSSCG00000040833	BRF2	2.58336	6.11816	2.85347	5.41951	4.93262	4.10654	5.23604	5.99729	4.27315	4.62634	4.16053	4.58987	3.38963	2.33601	4.59181
ENSSSCG00000037605	BRI3	92.9557	109.507	89.0238	119.768	78.7936	101.026	114.734	130.91	110.453	126.162	93.7923	92.7272	302.676	234.702	107.366
ENSSSCG00000032831	BRI3BP	7.9263	6.6121	4.25463	8.36969	5.14129	2.87334	7.24952	5.70365	9.36884	4.51089	6.98415	3.2027	4.34968	2.35507	14.9484
ENSSSCG00000021384	BRIP1	1.79707	1.41388	1.70794	2.91259	1.98767	1.78754	1.08069	1.26544	2.04007	1.78338	1.17817	1.33816	0.142067	0.120697	2.65072
ENSSSCG00000016827	BRIX1	24.7749	24.4466	21.9978	27.3486	26.8601	31.9086	24.0485	26.6526	18.669	26.1694	27.9778	37.0119	22.2644	26.7902	24.4882
ENSSSCG00000011565	BRK1	197.641	284.286	151.045	276.51	225.485	268.222	252.536	371.516	249.757	269.153	217.274	173.359	309.581	274.169	266.189
ENSSSCG00000012939	BRMS1	33.2895	33.0466	38.756	32.7474	26.6874	27.2388	31.7576	22.1793	33.375	33.4544	28.2656	26.1686	27.7208	27.9402	31.6734
ENSSSCG00000001947	BRMS1L	3.86584	2.24635	3.3616	4.43688	2.73503	2.51268	1.9506	1.69138	1.98464	2.31517	2.23576	1.73727	3.27414	3.64691	1.71815
ENSSSCG00000010836	BROX	38.5562	17.8087	38.5634	26.1944	42.2629	45.829	27.95	19.5297	37.153	48.9792	39.1734	53.7374	37.1583	41.6333	32.3736
ENSSSCG00000011548	BRPF1	13.0796	9.37504	17.5017	8.69217	14.648	16.3307	18.6307	14.1191	18.4069	19.0268	26.3421	29.9598	10.5951	11.3633	17.1922
ENSSSCG00000020803	BRPF3	6.76765	5.77511	7.77028	6.72593	5.63172	5.72494	7.61181	5.29628	11.6259	12.6508	9.01464	10.1572	4.47193	5.14817	9.27855
ENSSSCG00000021042	BRWD1	57.4273	39.5698	49.2952	48.0542	49.7217	58.9666	49.0979	60.3099	46.2296	61.0177	50.6318	66.7497	31.7471	29.9333	42.6227
ENSSSCG00000025156	BRWD3	3.61147	1.41995	6.36654	2.69694	4.3083	4.33573	1.57838	1.3325	4.66469	5.6921	4.73461	7.82507	4.52668	6.90657	3.1848
ENSSSCG00000020823	BSCL2	56.764	37.0931	73.6582	38.5253	50.391	46.971	44.3077	30.5863	50.431	37.1084	52.007	45.3768	37.2594	36.2823	44.9529
ENSSSCG00000026392	BSDC1	19.786	12.9361	25.9302	15.1266	19.0837	25.6444	15.7047	12.9769	20.7809	25.1516	22.8143	32.1784	23.9263	23.2251	15.9565
ENSSSCG00000033453	BST2	7.78912	21.0224	7.6791	20.5974	8.59465	11.0802	14.7018	20.5849	29.5016	38.9426	6.69782	7.13576	21.5495	53.0621	16.7023
ENSSSCG00000010467	BTAF1	16.8837	9.79983	18.5	9.66452	14.2206	15.8925	7.4591	6.80709	13.5615	16.858	17.9055	27.4747	19.5002	20.763	15.1312
ENSSSCG00000001801	BTBD1	23.6931	26.8364	29.3647	28.5258	40.6503	38.8067	39.2984	37.3	42.7214	46.1529	49.0566	62.7913	53.7852	54.4695	51.5297
ENSSSCG00000013395	BTBD10	8.25029	9.52737	8.75321	17.7471	8.93988	8.93716	7.92763	7.65922	12.5047	11.3681	8.11841	6.70531	30.0319	22.2147	12.312
ENSSSCG00000000162	BTBD11	0.962446	8.30749	0.375719	1.26264	17.435	18.5064	19.8581	16.7909	15.3452	13.1917	13.306	20.9997	0.499977	0.782312	19.4415
ENSSSCG00000003926	BTBD19	2.87991	7.00125	4.79196	4.15649	3.46444	3.4738	3.32406	2.76936	8.15632	9.17457	10.7196	18.7693	1.84553	3.10728	0.9551
ENSSSCG00000013444	BTBD2	44.7632	35.0096	37.2395	23.0634	42.9778	46.7222	37.5198	36.2916	47.3138	43.1605	46.8384	50.407	44.1034	42.3963	47.0931
ENSSSCG00000020853	BTBD3	2.70356	3.73283	1.31423	1.42897	6.17197	4.86034	4.63	4.81721	1.77435	0.88667	8.96744	6.11889	13.5411	10.5522	3.22697
ENSSSCG00000035555	BTBD6	6.16532	10.5618	5.73847	8.91078	11.3109	9.88586	11.0128	10.2114	15.0242	13.095	13.122	9.01464	28.1815	22.0138	13.0234
ENSSSCG00000002461	BTBD7	4.055	2.95842	10.4868	4.39542	7.03258	8.69293	2.81341	3.34615	5.8506	8.60775	7.33948	12.6824	5.32074	11.7184	4.81798
ENSSSCG00000035196	BTBD8	5.90644	1.51802	5.40963	1.33526	7.57149	7.10791	4.37512	3.9344	6.61994	6.88479	8.15442	7.84934	3.10232	3.35616	3.61388
ENSSSCG00000037507	BTBD9	7.38484	11.5715	8.76058	12.219	8.50582	8.88806	6.32507	7.97926	10.2418	7.82969	10.9629	10.6224	10.3398	8.6829	8.313
ENSSSCG00000011193	BTD	10.9832	14.9597	11.6931	13.8997	14.8829	10.9493	11.8387	10.8926	17.6133	13.1113	19.3426	12.4354	6.01118	4.74925	10.8713
ENSSSCG00000014071	BTF3	696.804	691.29	672.356	986.424	805.829	682.196	999.62	862.608	697.579	831.802	653.695	543.375	838.62	763.615	661.218
ENSSSCG00000038762	BTF3L4	43.4541	53.0173	39.3393	66.378	58.6543	63.5861	42.4769	68.915	46.3561	50.7185	58.7658	52.0753	37.8928	38.5613	52.5232
ENSSSCG00000035790	BTG1	369.287	476.999	635.977	678.056	816.677	843.75	724.663	829.387	563.785	655.096	596.102	714.869	380.675	445.225	529.9
ENSSSCG00000012014	BTG3	2.72136	2.00197	1.72878	4.02408	0.188657	0.311665	2.37919	1.57838	0.68403	0.748376	0.267942	0.662557	7.84738	7.58379	5.46228
ENSSSCG00000026742	BTK	138.885	65.5941	163.889	110.662	0.3265	1.35736	0.595911	1.91494	0.88667	0.67499	0.251127	0.335231	147.624	149.758	12.6311
ENSSSCG00000001131	BTN2A2	3.40053	1.38095	9.77068	3.23963	0.496229	0.563196	0.804966	0.935504	1.02097	1.06716	0.6063	0.82799	0.394235	0.225226	1.63904
ENSSSCG00000010563	BTRC	5.48216	4.43099	7.56099	5.94925	7.37222	7.10289	5.39571	4.61981	6.52103	7.93743	8.49841	9.81326	5.02958	5.81302	5.76573
ENSSSCG00000030469	BUB1	7.87275	4.02734	2.81715	5.71373	1.56428	1.43236	1.66324	0.952495	4.29468	4.04057	0.558569	0.563937	0.174498	0.353447	20.577
ENSSSCG00000010726	BUB3	100.033	73.1422	66.3025	81.7526	78.0292	72.894	67.0439	83.1029	77.8675	78.842	75.9871	80.9047	56.3807	52.0355	136.678
ENSSSCG00000015065	BUD13	13.4429	11.776	12.5157	14.0314	17.3873	13.9174	14.3258	13.7133	18.35	15.5715	14.3561	11.0437	16.6707	14.2534	17.4398
ENSSSCG00000007713	BUD23	66.517	101.737	55.0467	82.4375	77.933	89.8557	76.8059	93.1502	88.5815	106.559	80.8148	82.7057	64.9916	67.5948	72.6496
ENSSSCG00000007623	BUD31	69.3731	97.9245	74.4535	99.4479	78.6805	90.3297	88.6892	83.4319	75.6208	116.504	76.4652	63.421	80.4146	94.1813	101.661
ENSSSCG00000026752	BYSL	11.5797	14.0663	7.86794	13.5753	6.56672	4.92842	10.7127	9.80998	9.63565	7.24548	3.99005	3.26084	20.2472	16.1742	18.6323
ENSSSCG00000016094	BZW1	153.684	203.542	111.311	183.571	310.778	253.245	206.636	268.982	234.091	216.398	220.945	190.595	257.149	216.749	263.765
ENSSSCG00000023118	BZW2	62.8481	57.8229	43.1925	66.8229	97.2789	86.0948	79.9368	85.2307	77.4048	74.4164	44.2454	30.2177	76.0242	65.7919	63.8014
ENSSSCG00000040426	C10orf143	18.2315	82.2451	20.8791	41.2248	27.7632	37.0912	24.3836	58.3368	34.709	26.3713	30.0849	41.4219	12.5813	20.6196	19.0076
ENSSSCG00000015027	C11orf1	2.9762	4.13447	4.29027	4.30881	4.18763	4.11792	4.79164	3.8901	3.8528	4.44188	5.67864	6.80271	4.46411	5.65094	3.38318
ENSSSCG00000014948	C11orf54	2.03132	6.73122	2.51989	7.65844	3.73872	5.99792	2.95311	6.61794	2.33275	6.10112	2.7924	5.60277	7.55259	10.6178	2.02695
ENSSSCG00000040570	C11orf58	49.8863	85.708	47.4363	68.7794	48.647	56.9834	45.9011	62.7861	46.4835	68.9192	53.6906	57.8726	38.4809	48.78	57.0869
ENSSSCG00000012966	C11orf68	10.4796	22.8076	8.81913	15.1342	16.2244	11.8611	14.8546	19.8434	18.1466	8.21788	20.9946	12.3631	22.405	16.6673	19.4195
ENSSSCG00000031666	C11orf95	1.11346	2.58336	2.04391	1.18279	0.33733	0.124888	2.7185	3.18101	0.62974	0.521333	5.92377	6.56942	0.496359	0.252046	2.29472
ENSSSCG00000000267	C12orf10	51.0812	129.02	61.0077	113.98	58.6337	96.7368	72.7631	126.214	55.8425	74.3168	48.5854	50.1697	52.7307	46.9112	62.89
ENSSSCG00000000925	C12orf29	17.1417	16.021	13.7969	18.989	20.375	15.6955	15.0604	18.1141	15.6696	20.7809	18.3168	20.9641	16.4769	17.437	19.8439
ENSSSCG00000000723	C12orf4	6.62286	5.96902	5.42651	6.22734	7.72896	6.68427	4.89042	4.42867	8.45232	7.62364	6.76989	8.22799	6.26519	4.87663	8.19738
ENSSSCG00000024329	C12orf43	6.57378	10.1852	5.7897	8.55148	8.51471	7.34662	9.98504	11.0082	7.26	5.75395	7.96528	6.54419	5.83572	4.79933	6.63518
ENSSSCG00000027792	C12orf45	17.5455	23.5728	20.7841	27.1626	10.6435	13.1646	8.80594	14.2137	9.22835	18.6218	10.5989	14.6801	9.13436	10.2359	10.9211
ENSSSCG00000035873	C12orf49	4.36177	11.8629	4.77368	10.0324	4.89295	7.21507	5.14795	10.3037	5.40873	6.75878	5.0094	6.16623	2.80869	2.49587	3.9284
ENSSSCG00000040186	C12orf57	28.4267	80.986	27.9013	62.4163	32.2172	46.0194	38.3644	62.3078	28.5069	32.6467	25.9379	26.7484	37.1303	37.3662	30.7997
ENSSSCG00000009774	C12orf65	3.32361	2.55266	2.22524	4.01582	2.97023	2.61597	3.02124	3.3181	2.79821	2.92555	2.80662	3.52445	0.85482	0.717447	5.31227
ENSSSCG00000032910	C12orf73	50.4919	62.2739	42.2451	71.4983	51.6586	63.3094	75.9479	77.1601	57.6181	63.0566	50.1388	34.0818	67.1179	47.4665	80.7573
ENSSSCG00000002035	C14orf119	28.7014	46.9074	18.4061	56.9508	32.9488	36.124	38.8384	51.49	37.8505	40.9233	30.8363	19.0174	32.7307	21.317	37.7033
ENSSSCG00000030679	C14orf28	10.9867	6.50354	18.5211	11.9422	7.36595	11.2902	6.82681	5.67593	5.80371	10.348	13.9457	23.3827	11.0015	17.9432	6.12622
ENSSSCG00000031452	C14orf93	0.920259	1.09257	1.15066	0.900269	1.27657	1.13381	1.56134	0.643893	0.793702	0.572356	1.8672	1.24942	0.789822	0.977769	1.12937
ENSSSCG00000001885	C15orf39	3.40899	4.0117	1.18453	2.48224	3.34344	2.2032	2.32424	3.5094	4.3034	1.39444	1.00079	0.378115	2.79129	1.69976	7.63999
ENSSSCG00000030131	C15orf40	17.4823	36.8314	18.677	31.536	21.2412	25.531	21.6714	31.9576	17.489	24.3726	17.698	19.0728	28.9236	28.8232	18.3159
ENSSSCG00000026900	C15orf41	12.6095	16.3696	8.93053	18.9056	10.9826	8.87694	11.8506	11.8387	16.2159	11.7469	12.0755	7.88492	7.93317	5.8517	26.1738
ENSSSCG00000004670	C15orf48	39.9635	57.6134	59.9557	121.431	10.2362	10.8055	34.1853	37.2414	26.6002	49.1734	12.1536	6.01018	212.783	216.462	9.64913
ENSSSCG00000004954	C15orf61	23.9365	36.2814	21.5761	35.2073	28.7137	47.1525	34.2351	44.8709	34.3149	26.792	34.3255	44.0104	19.8014	16.6925	38.3681
ENSSSCG00000007753	C16orf58	3.62425	3.41165	4.13309	2.6178	4.17613	5.16935	3.92452	4.18541	3.54247	5.17599	5.16843	4.7583	3.69254	3.55517	3.35062
ENSSSCG00000040749	C16orf70	10.3064	7.28336	9.94414	9.21268	12.8257	12.9551	8.60689	7.94204	13.9453	9.83697	12.1909	11.4543	8.47563	8.35848	9.71795
ENSSSCG00000028454	C16orf72	16.4227	14.3274	18.3311	16.7192	21.2676	24.1	15.1958	15.5397	25.1187	28.1734	21.7541	39.3229	26.8409	24.4618	21.399
ENSSSCG00000022333	C16orf87	25.5165	31.9544	27.5061	38.5634	12.754	14.4757	8.3313	8.76483	15.0281	20.3438	7.34171	7.79482	24.5002	22.8128	2.95778
ENSSSCG00000038882	C16orf91	4.77844	14.6123	4.03133	11.2643	6.94652	6.35032	6.798	11.8783	5.78136	4.94704	6.2776	4.49756	5.52642	5.00431	8.00136
ENSSSCG00000017733	C17orf75	16.3788	16.4647	16.3238	17.6751	23.3195	20.0262	22.1073	19.9137	23.0078	22.4913	30.9814	22.6866	13.5676	11.078	30.2375
ENSSSCG00000017246	C17orf80	14.0275	12.4073	16.8789	11.8021	18.5064	27.0689	20.7308	21.3998	18.7143	30.5031	41.2392	54.1606	5.94645	7.08405	12.1153
ENSSSCG00000030002	C18orf21	42.3805	57.0481	48.7606	62.784	33.7463	39.0798	45.1173	53.3117	37.0949	35.1795	36.1389	28.0037	36.2485	26.7488	38.9404
ENSSSCG00000004500	C18orf25	4.73909	7.92184	7.0909	8.76308	8.34304	9.28815	5.67271	8.31159	7.28141	9.51623	7.86626	11.1505	5.08739	5.20973	7.54929
ENSSSCG00000004531	C18orf54	5.4487	5.32572	4.99338	5.79904	5.81811	4.62567	3.40281	3.49228	4.44856	5.34618	3.44963	7.80475	3.87031	3.42579	11.6185
ENSSSCG00000032153	C19orf12	2.78309	7.44481	3.26847	5.02858	2.69986	2.68756	4.7285	8.89058	2.33856	3.11813	4.37733	3.62858	8.78943	7.77859	4.67675
ENSSSCG00000022265	C19orf25	25.4818	30.1774	20.1533	21.7695	23.4894	28.2338	25.6945	31.5716	27.2993	25.5208	33.4725	33.3657	15.4734	11.4317	26.4146
ENSSSCG00000013632	C19orf38	4.6711	8.74208	0.362558	0.203178	0.443443	0.657066	0.357292	0.112209	0.4841	0.93128	0.4275	0.271959	217.971	176.657	0.23347
ENSSSCG00000013859	C19orf44	0.571215	0.6629	1.3168	0.950072	0.499561	0.270377	0.361865	0.543403	0.362231	0.418332	0.496131	0.792955	0.556477	0.678168	0.500116
ENSSSCG00000027016	C19orf47	4.21826	4.78718	2.91259	3.60466	6.39413	6.08685	5.88558	5.33958	6.24662	4.20265	4.34609	4.57299	4.30313	3.46436	7.4412
ENSSSCG00000013757	C19orf53	66.1212	101.846	72.6986	83.6463	62.8757	75.6935	66.4444	94.9477	56.6323	64.6155	64.3865	66.4575	57.9171	69.4894	64.3735
ENSSSCG00000040533	C19orf54	3.39247	5.43288	4.5427	5.16218	4.24125	2.96202	7.81554	8.6836	3.62243	2.28886	3.14419	2.07817	2.31457	1.96792	2.94108
ENSSSCG00000039905	C1orf109	10.6666	7.68231	10.0324	8.04325	11.2642	9.42238	9.57232	6.70641	9.20234	8.73093	11.8283	11.1775	9.7825	9.24375	9.81357
ENSSSCG00000006284	C1orf112	10.317	5.58886	8.77957	11.7188	5.20059	6.74702	4.91155	3.78591	5.02493	6.71079	5.89832	8.12532	1.67302	1.54752	8.4081
ENSSSCG00000038888	C1orf122	13.9926	20.0313	12.4137	18.0555	21.1635	24.6147	17.3177	30.2821	22.4327	34.0369	13.4497	15.8274	10.6312	11.9116	10.4083
ENSSSCG00000010176	C1orf131	3.46274	3.20235	4.14782	4.12449	5.28278	4.02435	4.88292	3.83269	4.2045	4.37663	4.06208	3.39475	3.23203	4.24895	3.58925
ENSSSCG00000031102	C1orf174	2.61793	8.46721	3.57638	7.40118	4.80127	5.12207	5.90387	7.02124	4.13026	4.88616	5.35118	4.29065	5.05148	4.00233	4.31655
ENSSSCG00000010181	C1orf198	3.98933	6.64543	2.65103	3.27667	5.75426	4.51701	5.97732	6.15789	6.42518	5.96477	11.0827	8.46972	12.2767	11.4974	7.34367
ENSSSCG00000015565	C1orf21	13.0221	12.731	2.4749	3.05927	2.57969	1.25959	19.4773	14.7018	12.2905	9.86205	8.77831	7.14125	42.5649	50.0036	12.7035
ENSSSCG00000013991	C1orf35	12.7533	13.6552	14.0219	11.4492	16.665	17.9114	16.9927	13.0305	12.8413	16.8042	19.5695	23.9089	14.3713	15.6058	15.3926
ENSSSCG00000006554	C1orf43	23.907	40.5042	25.3568	41.6066	22.6224	32.2898	24.0626	35.0757	24.7768	30.901	26.7484	34.1911	31.499	27.6776	16.9301
ENSSSCG00000026772	C1orf52	13.328	18.4249	10.0532	14.3526	9.40372	16.8939	10.8483	12.8029	8.91943	16.8691	13.4064	28.9795	10.8893	12.7829	13.4257
ENSSSCG00000032380	C1orf53	2.05118	12.0312	3.22139	8.66796	2.67318	2.76182	2.47037	4.08647	2.93638	1.46698	3.27175	1.90642	6.50893	6.89135	2.61499
ENSSSCG00000015613	C1orf74	17.3167	21.4387	14.8214	19.486	21.2532	29.1146	17.444	20.1572	18.1913	23.4829	23.9339	33.0935	18.2765	18.1993	21.3607
ENSSSCG00000035048	C1QBP	107.829	149.294	88.0737	153.718	64.4672	76.5522	82.0039	120.778	53.6763	65.8848	58.7091	50.0323	66.7284	65.5271	65.6733
ENSSSCG00000035511	C1QTNF1	0.506471	0.68455	0.00331914	0.00916371	0.207151	0.0489511	0.00132549	0.0845513	0.0231088	0.00247515	0.357135	0.184192	3.79486	1.91331	0.00079626
ENSSSCG00000030325	C1QTNF6	0.276587	0.140097	0.395116	0.13941	0.460491	0.92227	0.950904	0.406462	0.820237	0.577754	0.310709	0.643765	0.103698	0.0927085	6.37477
ENSSSCG00000033913	C1RL	0.522038	0.372346	0.279855	0.200514	0.292224	0.226206	0.20384	0.1708	0.0552104	0.0650222	0.166506	0.325322	9.06115	3.92605	0.0321271
ENSSSCG00000001422	C2	0.0884238	0.271788	0.060159	0.0746738	0.00387933	0.4876	0.00132549	0.00422539	0.0334084	0.205801	0.178078	0.0298715	99.5522	129.715	0.00079626
ENSSSCG00000007155	C20orf194	0.512397	0.969146	0.634257	0.272472	0.972009	0.614009	0.658549	0.736698	0.335964	0.449862	4.0031	3.87257	1.68062	2.03908	0.789532
ENSSSCG00000035666	C20orf27	39.9065	53.1588	49.7305	53.8626	64.0496	52.3773	75.0147	62.1148	100.515	69.94	49.0864	31.0261	139.417	109.259	36.9076
ENSSSCG00000033025	C21orf91	15.1351	15.5651	13.0366	15.6903	24.6627	21.8935	15.6438	23.4438	23.8903	22.0597	17.3288	16.5248	48.4407	40.7401	23.1622
ENSSSCG00000025821	C2CD2	0.15759	0.108341	0.0890734	0.14227	0.666994	0.71701	0.155254	0.119951	0.856495	0.700157	0.668866	0.82546	1.41111	1.35385	0.372902
ENSSSCG00000015111	C2CD2L	8.3388	5.72626	10.1012	7.93879	5.74896	8.47679	9.40347	7.14596	8.78118	8.21138	6.45011	7.09044	29.6822	32.7307	7.78825
ENSSSCG00000014835	C2CD3	7.62888	5.23663	11.0599	5.70222	7.91288	7.06477	5.94251	5.28992	9.84306	9.56754	9.67591	10.2842	7.6118	10.0084	8.1045
ENSSSCG00000000570	C2CD5	27.3814	20.2175	24.8703	26.4215	30.7305	25.3653	18.885	19.4895	32.1201	26.7143	27.5167	23.699	24.5922	17.2017	29.1501
ENSSSCG00000008332	C2orf42	2.90654	3.70562	3.48917	4.73929	4.58171	3.4986	3.73682	5.76737	5.47197	4.37108	5.69085	4.7828	4.21	4.44902	6.16155
ENSSSCG00000035390	C2orf49	6.13603	2.32266	4.36018	6.24485	5.89938	4.32779	4.95066	5.02734	4.72609	3.00234	5.40785	4.57568	4.67694	2.75813	8.20097
ENSSSCG00000028287	C2orf68	27.8634	16.6029	17.9746	15.2979	19.3144	19.9907	21.3828	16.6757	21.8037	23.7278	25.4447	26.7193	21.8259	17.028	24.1259
ENSSSCG00000016086	C2orf69	3.85789	6.52795	3.41416	5.09362	6.03846	5.05639	4.76009	5.31188	7.06613	4.64052	12.2213	9.66963	4.9124	2.55383	6.39449
ENSSSCG00000015718	C2orf76	26.627	23.7639	20.1995	43.6666	26.6309	37.3671	21.3091	48.6168	24.2626	17.6705	18.3253	15.3825	17.3089	16.3274	26.44
ENSSSCG00000013551	C3	0.260768	0.769186	0.0142444	0.0816854	0.459873	0.368172	0.667137	0.705767	0.292965	0.307286	3.64948	2.46652	8.02983	7.84467	0.14649
ENSSSCG00000037433	C3orf18	0.167746	0.607989	0.161763	0.146522	0.852305	0.742168	0.770824	0.715495	0.733116	0.87784	1.13969	1.32904	0.0777951	0.12823	0.202561
ENSSSCG00000034645	C3orf38	15.7648	29.7181	19.4605	31.2399	12.5858	17.9265	11.6271	15.207	16.2651	23.1156	14.2056	27.3694	25.0054	24.8554	19.8553
ENSSSCG00000011482	C3orf67	1.5732	1.56511	2.63932	2.22236	2.4291	2.56196	1.80074	2.27164	1.16789	1.42988	2.72876	4.6983	0.598329	0.952369	1.19469
ENSSSCG00000001427	C4A	0.215895	0.0518613	0.567126	0.222082	0.288667	0.347035	0.19548	0.20349	0.261155	0.409095	0.290014	0.592594	0.0881241	0.214942	0.204475
ENSSSCG00000001427	C4A	0.215895	0.0518613	0.567126	0.222082	0.288667	0.347035	0.19548	0.20349	0.261155	0.409095	0.290014	0.592594	0.0881241	0.214942	0.204475
ENSSSCG00000015661	C4BPB	128.491	50.087	84.0619	80.2987	0.844717	0.902798	1.0137	1.87208	1.71567	2.01127	0.344843	0.726158	0.641166	0.554534	3.83051
ENSSSCG00000009069	C4orf33	7.5404	11.477	3.57318	10.6735	7.56109	6.13269	5.11041	6.107	6.44883	4.11148	5.7409	5.61957	12.6166	12.0594	4.03001
ENSSSCG00000015794	C4orf47	4.1591	4.89359	5.0717	4.82297	2.57378	2.84313	1.94964	2.91312	2.15934	2.89825	2.73036	2.87232	3.41029	5.30995	1.15535
ENSSSCG00000005512	C5	0.500049	0.0368418	0.274669	0.23923	0.205533	0.174068	0.122059	0.0292037	0.256897	0.186076	0.161209	0.302748	0.30663	0.333366	1.33309
ENSSSCG00000029371	C5AR1	0.078645	0.118181	0.123978	0.12846	0.0776914	0.6174	0.028609	0.00422539	0.0906011	0.810899	0.249897	0.0822051	284.889	247.902	0.0870378
ENSSSCG00000032323	C5orf15	11.024	17.9556	6.94509	21.0891	15.3453	11.0985	16.633	17.7085	17.8482	14.9434	17.5238	7.50562	28.5095	18.0263	24.1413
ENSSSCG00000016808	C5orf22	7.76024	4.11669	8.73948	6.68313	8.8702	9.14576	2.96281	5.00722	7.44188	11.9526	7.41108	12.0033	5.05602	5.05387	6.94965
ENSSSCG00000034954	C5orf24	25.456	11.4191	31.5661	23.0846	19.2849	19.6363	11.2587	12.1028	17.0398	20.6514	16.6693	21.7709	15.9873	13.4624	18.9491
ENSSSCG00000016876	C5orf34	8.34918	4.90444	10.207	8.60595	8.88642	8.99274	5.45105	6.12511	7.17526	9.94104	13.1718	18.4975	3.87229	4.03051	8.38092
ENSSSCG00000040855	C5orf51	8.55018	4.27504	7.16964	7.02051	9.90784	10.188	5.49273	6.60104	9.5907	10.6155	11.2936	12.6904	13.3496	10.3207	9.4432
ENSSSCG00000038931	C6orf120	38.3967	37.9056	31.5483	39.845	48.948	36.7575	44.832	40.6045	57.2356	45.0011	56.2356	34.9981	60.0264	44.4298	60.423
ENSSSCG00000025943	C6orf136	13.4712	9.50069	13.5395	10.215	10.8395	14.6621	16.4689	12.2842	10.0923	14.6219	13.9812	22.8974	6.84298	8.1978	10.8312
ENSSSCG00000038752	C6orf62	223.079	67.2967	225.237	100.067	160.728	135.599	119.983	79.0745	173.048	140.523	205.986	208.555	186.879	141.815	168.551
ENSSSCG00000035341	C6orf89	12.0224	10.6952	11.9853	9.51005	15.2036	14.9316	10.1511	9.67174	16.3251	18.2709	18.0657	20.5438	29.6357	37.0829	12.5296
ENSSSCG00000016760	C7orf25	6.11816	5.94963	6.27507	7.20705	7.95387	6.48171	6.71672	6.34696	5.99793	4.67736	8.22799	8.11221	8.29741	6.52879	4.70757
ENSSSCG00000036192	C7orf26	21.5062	30.4082	18.7755	16.7303	36.0529	29.3712	35.1653	35.6475	38.5026	26.2258	35.7372	36.5702	27.6776	19.7769	34.7586
ENSSSCG00000038777	C7orf50	1.91767	4.83807	1.74781	3.87171	2.63295	2.96811	2.90604	4.83832	2.48888	3.00898	2.51129	2.22882	1.93459	1.75521	3.10679
ENSSSCG00000035887	C8orf34	1.43482	1.25904	1.71324	2.93807	3.33339	3.32626	0.750791	2.20823	2.04797	3.75395	0.321797	1.12337	1.16389	1.44007	1.67091
ENSSSCG00000034398	C8orf37	0.856853	2.36794	1.65563	2.58261	1.43632	1.89614	1.07943	2.50497	1.01919	1.53905	1.77801	1.80767	1.26177	1.24466	0.516356
ENSSSCG00000005895	C8orf82	31.5086	25.0343	24.1946	27.7293	19.7707	20.0323	33.4258	20.0119	22.6447	15.8388	17.2877	23.2336	29.3924	22.1998	23.3697
ENSSSCG00000040562	C8orf88	2.03939	0.639369	0.515043	0.244998	4.74758	3.9504	1.00808	2.51043	1.99678	1.75612	1.28371	1.07415	0.747559	0.667676	6.2108
ENSSSCG00000005452	C9orf152	0.641779	0.788541	0.0233091	0.221455	1.4489	1.01907	0.607149	0.458226	0.617053	0.289051	2.56526	1.45005	0.582309	0.313946	0.751578
ENSSSCG00000034203	C9orf64	8.74208	9.95745	4.19051	7.60095	7.87262	5.1628	12.4856	12.8506	6.76134	4.20615	13.8212	7.987	16.942	7.80763	20.1856
ENSSSCG00000011010	C9orf72	12.09	6.49741	7.69223	7.28983	6.24449	7.15781	3.49516	4.86573	5.80081	5.9398	5.66955	5.95129	58.7899	66.3098	7.31748
ENSSSCG00000030426	C9orf78	29.821	39.2576	24.0556	29.0053	29.1317	25.4943	27.5718	29.6928	31.9013	30.0948	33.3983	28.6587	37.3662	36.7627	34.3235
ENSSSCG00000031105	C9orf85	4.07324	6.35867	3.5944	6.98408	5.22671	4.54578	4.04679	6.97717	4.01389	6.37797	3.7423	4.58077	3.67147	2.73383	5.24289
ENSSSCG00000003147	CA11	0.551686	0.310895	0.616432	0.666064	2.39174	3.03753	1.33373	1.52194	1.25437	1.96019	0.999645	1.81461	0.37626	0.342498	0.559736
ENSSSCG00000006143	CA13	0.567899	0.410911	0.43471	0.42792	0.561764	0.295763	0.439503	0.378822	0.200825	0.732549	0.331533	0.397002	15.1916	9.67786	0.302124
ENSSSCG00000006140	CA2	1.51209	0.130324	0.228691	0.0892686	0.117049	0.0880804	0.125119	0.223497	0.013856	0.00247515	0.03775	0.0281831	0.184805	0.0023305	0.110564
ENSSSCG00000012141	CA5B	10.8	14.3795	12.4683	13.1301	4.70422	4.95958	8.16584	5.60104	12.1933	10.1173	20.447	14.9661	6.93762	4.99248	13.4668
ENSSSCG00000006233	CA8	26.1945	35.4305	36.9178	53.7405	0.167955	0.0395496	0.131491	0.423818	0.020065	0.0585059	0.0271263	0.00498369	0.0344202	0.10397	3.19525
ENSSSCG00000016266	CAB39	49.3853	41.6122	34.8702	34.4758	93.0115	76.6838	57.678	47.6655	118.255	79.4389	89.0448	74.2084	79.4242	61.628	174.429
ENSSSCG00000009397	CAB39L	17.1108	21.5277	16.2377	20.4279	20.135	16.4252	15.0546	14.7388	30.3515	27.7706	26.7193	19.0112	11.1549	11.8921	28.0322
ENSSSCG00000010062	CABIN1	9.88444	8.3981	9.14173	7.2318	11.5409	9.87782	8.93555	7.95439	13.7091	8.36481	12.2438	9.52597	9.07002	8.86317	12.9003
ENSSSCG00000003705	CABLES1	2.17403	0.880955	1.74957	1.77	0.183792	0.106904	0.784458	0.146997	0.183832	0.0704681	0.143743	0.111195	0.262543	0.173333	2.86479
ENSSSCG00000007540	CABLES2	7.04201	6.17835	8.06146	5.97625	7.58929	10.2362	9.52761	7.32236	9.59376	11.3599	9.46456	10.0629	4.46144	6.66948	7.82194
ENSSSCG00000003711	CABYR	1.09341	0.591244	2.16147	1.4051	1.91679	2.65218	1.15053	0.859594	1.41085	2.4405	1.33816	2.04823	0.674786	1.01039	0.371753
ENSSSCG00000040709	CACFD1	1.70643	3.51284	2.40891	2.6694	4.22413	4.92569	4.02962	5.50511	6.45896	6.66004	4.81492	5.49414	1.49982	1.81272	1.94279
ENSSSCG00000011455	CACNA1D	0.275261	0.045098	0.0175615	0.00916371	0.0346938	0.0155476	0.0237195	0.00422539	0.0137666	0.115119	0.0011845	0.0272002	0.59726	1.04712	0.288236
ENSSSCG00000000082	CACNA1I	0.538275	0.412287	0.664941	0.495446	0.403866	0.20193	0.194493	0.0700801	0.752732	1.4456	0.997616	2.43231	0.118047	0.0672905	0.0511686
ENSSSCG00000017510	CACNB1	0.700585	0.532303	0.41774	0.454152	1.49974	1.25042	1.53055	2.08476	0.630618	0.933704	1.59192	1.74199	0.269408	0.479071	1.2718
ENSSSCG00000032967	CACNB3	0.197586	0.377791	0.118264	0.050221	2.39954	1.61518	1.248	0.667137	2.60258	1.98592	1.01308	0.528224	0.134531	0.207495	0.659123
ENSSSCG00000029073	CACNB4	1.44532	2.6545	3.83267	3.38788	2.14106	3.30026	0.416621	0.725812	1.43989	2.55259	0.658006	1.48847	0.520573	0.467275	0.827254
ENSSSCG00000029073	CACNB4	1.44532	2.6545	3.83267	3.38788	2.14106	3.30026	0.416621	0.725812	1.43989	2.55259	0.658006	1.48847	0.520573	0.467275	0.827254
ENSSSCG00000003257	CACNG6	0	0.0117741	0.00331914	0.48124	0.00387933	0.00100702	0.00132549	0.00422539	0.00170735	0.00247515	0.0011845	0.00498369	5.25798	5.83572	0.00079626
ENSSSCG00000032085	CACTIN	9.24952	7.16154	7.69012	5.9556	9.04346	7.16916	6.24927	5.86052	11.1322	6.9478	8.99256	6.14697	7.59554	6.26776	8.76373
ENSSSCG00000038222	CACUL1	9.16177	6.06657	8.38387	7.41462	11.1803	9.21943	7.7405	8.2464	10.2707	7.68135	9.71486	8.44073	26.9927	24.8849	9.03889
ENSSSCG00000015504	CACYBP	130.384	100.625	113.559	121.821	183.792	151.177	129.439	105.994	156.443	197.169	113.051	99.6256	85.3264	75.6099	120.247
ENSSSCG00000028978	CAD	5.73775	5.5709	5.93444	5.44935	6.87588	5.05803	7.15248	6.60849	8.24637	4.32232	7.11075	4.85289	3.23597	3.29831	6.62792
ENSSSCG00000031831	CADM1	3.05108	4.19759	0.00331914	0.00916371	0.0214693	0.0144165	0.0213883	0.0564528	0.0113319	0.0755721	0.2038	0.0866465	16.314	18.0606	2.52089
ENSSSCG00000003061	CADM4	1.2577	8.22588	0.780381	0.620847	6.59543	7.42722	2.93437	3.52866	14.9378	10.2904	14.0798	14.2091	0.212963	0.514473	1.68349
ENSSSCG00000016611	CADPS2	0.565727	1.17857	0.318032	0.741479	0.0400183	0.00100702	0.219483	0.311293	0.0240162	0.00247515	0.27853	0.306864	6.12446	4.59095	0.281946
ENSSSCG00000038886	CAGE1	0.808463	1.12731	0.830418	1.87323	1.46742	1.6437	1.16296	1.49548	1.04224	1.20268	1.70354	2.2272	1.08887	0.918079	0.920489
ENSSSCG00000028481	CALCOCO1	22.9255	33.4731	22.8411	16.1377	27.6338	25.11	43.8836	42.7235	34.819	24.6871	50.565	39.6092	34.0318	31.9198	45.4094
ENSSSCG00000017543	CALCOCO2	37.434	46.8285	31.9357	38.6258	74.6896	65.6357	52.9598	60.5001	84.0556	73.8492	59.491	53.7965	32.9291	27.0593	54.1291
ENSSSCG00000016031	CALCRL	0.993114	7.77481	0.34223	1.25119	1.08585	1.02632	0.715495	1.26097	0.237315	0.260656	9.49693	8.96003	30.1585	25.7601	1.05815
ENSSSCG00000016535	CALD1	0.058201	0.124602	0.0483757	0.00916371	2.3095	1.52922	0.26487	0.419583	5.37884	1.27662	0.391424	0.00498369	0.745168	0.0639246	0.0514574
ENSSSCG00000010600	CALHM2	9.39898	12.3212	13.4698	13.6106	8.18117	5.68417	13.786	8.68812	23.2972	15.8851	5.07334	2.44202	24.7322	19.7417	47.4232
ENSSSCG00000036064	CALHM6	1.87751	2.64036	2.37667	6.42289	0.263386	0.298351	0.998828	1.02191	1.25048	1.64019	0.0613109	0.214391	2.65801	2.64107	1.26877
ENSSSCG00000025768	CALM1	237.918	337.393	229.052	273.054	367.977	276.362	312.748	240.152	532.447	470.73	552.338	420.569	331.981	309.581	413.524
ENSSSCG00000022545	CALM3	140.535	131.557	81.9885	84.0619	177.388	132.997	111.788	96.8301	205.63	125.081	146.327	118.947	105.79	96.5228	283.934
ENSSSCG00000026517	CALML4	0.0877359	0.255392	0.370122	0.283977	0.384769	1.87455	0.173988	0.576256	0.222499	1.70896	0.511011	1.79895	3.51319	3.34642	0.185928
ENSSSCG00000013746	CALR	294.305	201.507	182.434	153.203	202.508	127.741	238.511	139.757	290.688	181.656	250.477	143.107	276.346	246.546	325.877
ENSSSCG00000016581	CALU	14.764	10.8932	8.74296	8.61566	7.84346	6.40478	7.02303	6.05674	7.83733	7.61376	10.7476	7.74678	28.3714	26.063	14.9688
ENSSSCG00000011111	CAMK1D	4.50587	5.18288	11.6038	5.23802	6.74073	5.38288	2.79073	4.15531	9.19442	8.60285	5.03413	8.17696	3.37128	4.13539	5.4805
ENSSSCG00000009123	CAMK2D	55.7405	30.8332	79.1972	43.7297	56.3596	64.7497	27.2511	26.1572	47.0661	69.728	38.2014	61.162	44.9334	62.6085	36.7545
ENSSSCG00000010311	CAMK2G	18.7147	24.7659	16.9391	17.3505	36.0426	38.8306	30.9941	31.2667	37.8869	36.9042	49.1381	56.3198	25.565	28.6121	60.7506
ENSSSCG00000037019	CAMK4	17.9094	5.59259	0.387008	0.165905	58.4247	61.6269	36.838	43.0148	88.8183	86.1579	4.0213	2.45835	1.09403	0.925805	51.9326
ENSSSCG00000017873	CAMKK1	0.341037	0.499213	0.238892	0.258169	0.939756	1.03166	0.88593	1.19058	2.03313	2.97891	0.238755	0.239061	7.27959	17.7732	1.5056
ENSSSCG00000009815	CAMKK2	29.3487	29.574	28.2285	20.9478	45.3102	38.6068	67.9049	45.8094	64.8132	53.9325	119.471	106.498	12.5982	10.1063	96.4864
ENSSSCG00000008447	CAMKMT	4.01525	5.45541	4.20954	6.69865	6.32398	5.2139	5.47075	7.51634	5.62458	5.61476	5.68466	5.19986	3.66451	2.43572	4.19026
ENSSSCG00000025416	CAMKV	0.91447	1.43013	0.291927	0.578115	0.00387933	0.00100702	0.00132549	0.00422539	0.00170735	0.00247515	0.022303	0.0321949	0.00154798	0.0285978	0.0239182
ENSSSCG00000038955	CAMLG	6.80711	8.30212	6.54198	15.7955	8.05548	10.1172	7.39341	10.9492	8.27489	9.7591	7.60229	9.66011	7.14252	5.74382	8.22129
ENSSSCG00000005753	CAMSAP1	6.71942	3.2587	7.00225	3.68092	8.4082	9.18291	7.47464	4.91817	8.48279	8.36889	8.37211	10.4105	4.85058	6.2946	6.3608
ENSSSCG00000027314	CAMSAP2	3.3793	1.99022	7.91142	4.09894	0.230342	3.28696	0.0522204	0.620897	0.159525	1.23781	0.26313	1.16799	6.03541	9.34404	0.31822
ENSSSCG00000017902	CAMTA2	24.4422	16.5925	23.3104	15.0206	29.1614	28.6381	28.1691	20.8668	32.9698	31.5098	29.7667	34.3812	28.4077	34.9493	27.1901
ENSSSCG00000028869	CAND1	29.567	31.4206	34.6163	35.9497	39.0901	40.3888	24.6902	27.9879	42.0184	42.7006	50.1939	60.4672	22.0503	24.2634	39.1283
ENSSSCG00000011582	CAND2	1.93035	0.92151	2.37806	1.26935	0.244455	0.112894	0.08941	0.0367853	0.248522	0.107146	0.0520617	0.0502875	2.35683	1.43115	1.21318
ENSSSCG00000038130	CANT1	16.4863	22.9413	14.7147	17.2229	26.7423	17.4531	25.3521	19.3998	33.9918	22.8128	28.6889	17.6823	28.3379	20.3492	26.4671
ENSSSCG00000014020	CANX	141.678	115.44	93.1965	111.112	118.13	83.809	90.7442	89.398	148.31	112.849	137.701	89.2332	238.085	181.001	179.7
ENSSSCG00000003672	CAP1	266.913	325.218	237.415	265.675	498.806	284.797	477.199	392.834	599.434	426.009	633.215	355.006	512.032	423.714	590.612
ENSSSCG00000008239	CAPG	60.7978	291.099	40.6458	51.9253	135.525	108.774	135.319	125.178	196.699	147.441	671.274	403.984	390.955	390.955	176.206
ENSSSCG00000012999	CAPN1	65.7504	83.5936	68.7794	51.5433	109.77	82.7826	82.6504	66.5252	145.958	92.8545	164.832	124.644	134.006	107.741	83.5735
ENSSSCG00000037779	CAPN10	9.74024	9.8028	8.25614	6.05436	18.6627	24.6024	22.1936	18.6026	16.4474	20.9388	26.3093	36.4109	11.3978	17.2602	12.3537
ENSSSCG00000007993	CAPN15	35.3362	23.1261	37.1128	17.8731	43.1207	49.6104	53.2101	38.5043	43.0315	44.662	41.9226	43.1155	29.4903	30.9179	40.224
ENSSSCG00000029411	CAPN2	40.113	30.7671	27.9187	20.1199	44.2285	30.2442	32.6209	21.8819	108.792	79.2901	52.9875	35.4439	110.64	109.723	132.159
ENSSSCG00000004728	CAPN3	0.00590131	0.0399132	0.0579491	0.0875768	0.00387933	0.220472	0.00132549	0.00422539	0.00170735	0.0579738	0.0454458	0.00498369	71.6407	62.9745	0.00079626
ENSSSCG00000014875	CAPN5	0.422906	0.378131	0.19936	0.165603	0.650913	0.254114	0.371611	0.372468	1.28725	0.466889	0.135484	0.157026	0.186162	0.145047	7.61287
ENSSSCG00000030697	CAPN7	16.8936	11.2187	14.3775	10.1158	22.2355	20.1748	13.3939	11.3071	16.7983	18.517	19.4794	19.4382	10.4904	13.2618	24.9285
ENSSSCG00000030149	CAPNS1	275.483	307.853	242.581	205.847	460.194	304.95	376.34	307.741	502.111	362.695	560.781	352.748	473.644	454.147	412.384
ENSSSCG00000013305	CAPRIN1	105.506	54.7404	60.9053	61.0077	74.8521	60.049	56.0954	52.5519	94.3146	60.5555	75.2572	64.097	111.387	73.6893	122.489
ENSSSCG00000022611	CAPRIN2	5.63652	1.40754	11.0387	4.67927	7.35647	12.5604	4.85261	4.23306	4.55433	9.31639	7.2762	15.4945	1.28525	2.61798	4.54133
ENSSSCG00000031959	CAPSL	0.850505	0.0610418	1.1219	0.752127	0.708516	0.399191	0.328037	0.345114	0.123418	0.221733	0.52671	1.0962	0.417219	0.719021	0.244096
ENSSSCG00000006775	CAPZA1	272.432	218.128	179.554	381.359	224.677	168.582	167.543	211.113	385.015	252.731	190.9	119.146	398.146	261.664	362.391
ENSSSCG00000028113	CAPZA2	77.9586	119.853	64.7375	130.761	97.1222	97.4576	78.8879	127.705	97.5831	115.524	90.3869	82.5624	223.263	220.022	110.254
ENSSSCG00000003493	CAPZB	199.806	212.058	154.51	144.206	303.749	193.605	249.945	188.296	387.454	246.563	313.756	217.683	277.987	214.074	287.391
ENSSSCG00000034390	CARD11	39.9298	21.275	48.4239	21.7905	36.9333	38.4956	21.4668	14.7447	36.306	34.0758	45.5186	49.5323	7.40545	5.25534	37.3209
ENSSSCG00000008077	CARD19	9.43609	14.8211	3.8664	10.1708	68.4209	72.1757	23.1589	31.5202	106.364	123.695	19.2763	19.9735	37.7194	54.8142	23.2684
ENSSSCG00000031715	CARD9	22.8959	5.12436	14.9936	9.07559	0.0381178	0.806598	0.141803	0.168359	0.0289659	0.617053	0.0189798	0.0713947	105.748	151.038	0.335235
ENSSSCG00000016117	CARF	5.23005	1.73109	5.70452	3.35874	6.44611	7.18873	3.35801	3.60159	3.99016	4.53331	4.9871	7.81552	2.04636	1.89818	2.73411
ENSSSCG00000026710	CARHSP1	25.7758	31.7468	16.2761	20.1152	33.0797	29.4997	43.3447	41.6615	40.5008	37.3679	41.4806	34.2858	10.5559	9.70155	76.4573
ENSSSCG00000013633	CARM1	17.0442	14.7221	13.6691	12.8216	13.561	14.0248	13.2269	11.0335	16.7955	13.4554	14.7207	13.7894	11.2972	11.449	11.2077
ENSSSCG00000022722	CARMIL2	25.7014	11.4152	41.5679	15.2532	34.4014	46.0554	23.2246	18.6916	26.3077	32.9577	27.4578	46.6502	3.67637	3.98367	11.776
ENSSSCG00000005271	CARNMT1	31.907	19.6556	30.1275	48.0305	17.9356	16.9727	22.9077	26.61	22.7621	24.8549	16.6302	17.9284	16.2046	11.0466	48.2074
ENSSSCG00000012911	CARNS1	0.273931	0.582334	0.432351	0.317378	0.395568	0.421398	0.490679	0.887553	0.0890213	0.0245395	0.849894	1.25929	2.1115	1.62261	0.577807
ENSSSCG00000012857	CARS1	11.1328	14.5142	9.878	9.3667	10.3536	8.58759	11.5111	9.33714	16.1921	10.2707	17.7237	17.0095	12.2661	10.8291	15.5462
ENSSSCG00000031757	CARS2	7.8678	8.12414	7.91979	7.21093	9.05147	11.597	10.1229	11.2279	6.14935	8.6398	8.58605	9.94489	10.6178	11.9004	11.8848
ENSSSCG00000040550	CASC1	0.940269	1.61353	2.51645	2.97573	2.50608	2.35698	2.19904	3.398	1.9797	2.72481	0.98854	1.45728	0.610769	0.527505	1.00818
ENSSSCG00000017477	CASC3	22.3089	17.1978	20.6989	15.7173	31.5975	28.9625	26.8866	21.2478	33.2386	31.0758	36.2014	34.4369	21.2774	18.7072	34.9109
ENSSSCG00000023996	CASC4	16.6262	23.3768	21.1397	21.6269	24.4501	21.4671	23.628	23.294	23.6461	28.4866	32.1277	34.2486	16.9874	18.471	31.6421
ENSSSCG00000015327	CASD1	11.1785	10.9989	9.86988	19.2214	15.074	14.1521	10.3601	15.4546	13.9414	10.6546	16.2987	14.8129	12.8446	7.50435	10.7122
ENSSSCG00000012253	CASK	1.37205	0.568761	1.09453	0.485204	3.62717	2.72001	1.73902	1.53702	0.805012	0.623919	2.25477	1.67603	12.4099	16.2589	1.14944
ENSSSCG00000040578	CASKIN2	0.0536052	0.265672	0.0437381	0.049174	0.136091	0.0201824	0.0932121	0.04453	0.0707875	0.0588851	0.468693	0.668115	0.0553477	0.142957	1.14535
ENSSSCG00000028711	CASP1	47.6289	38.7053	60.9771	91.0174	0.45092	1.48314	1.00246	1.15053	1.54262	2.81044	0.711753	0.00498369	344.616	276.989	3.14281
ENSSSCG00000028711	CASP1	47.6289	38.7053	60.9771	91.0174	0.45092	1.48314	1.00246	1.15053	1.54262	2.81044	0.711753	0.00498369	344.616	276.989	3.14281
ENSSSCG00000028711	CASP1	47.6289	38.7053	60.9771	91.0174	0.45092	1.48314	1.00246	1.15053	1.54262	2.81044	0.711753	0.00498369	344.616	276.989	3.14281
ENSSSCG00000026940	CASP10	5.81046	2.79281	8.97346	6.62243	8.86794	7.68042	4.51785	4.27655	7.75175	6.12351	5.99692	6.21822	2.62978	2.0157	8.61623
ENSSSCG00000034012	CASP3	34.6138	30.4798	16.8439	28.7746	19.2341	14.9423	17.3238	18.1441	21.8845	16.4726	18.3863	9.8775	33.3008	28.5993	30.0696
ENSSSCG00000009140	CASP6	29.7669	53.7986	26.4862	46.7318	34.8485	41.0887	44.4431	53.4759	36.2918	35.2136	43.4317	38.734	23.4776	19.7669	42.315
ENSSSCG00000032408	CASP7	10.728	11.4869	10.5672	14.3394	9.76355	8.70569	13.8943	14.4002	11.2423	12.366	13.649	12.6361	7.6939	7.62139	26.6028
ENSSSCG00000028157	CASP8	29.973	20.8699	36.5262	32.387	20.2683	19.8561	16.0101	15.6999	22.8741	26.9118	16.1463	20.8201	23.2251	20.1587	24.8068
ENSSSCG00000004331	CASP8AP2	7.24334	2.4093	7.07176	4.31071	9.63804	8.05867	4.90456	3.48443	9.32387	8.80485	9.30479	8.4532	4.13861	4.85058	11.1703
ENSSSCG00000003460	CASP9	11.2748	11.8761	6.93687	10.4475	12.9621	11.8259	11.4833	10.0413	15.6087	12.6315	11.7926	9.08096	21.7041	21.3873	11.3239
ENSSSCG00000006390	CASQ1	0.0932826	0.216922	4.80939	1.79658	0.131671	0.0313851	0.144353	0.105435	0.113465	0.182687	0.152847	0.462219	0.0217309	0.070373	0.157676
ENSSSCG00000007495	CASS4	6.30178	13.2308	4.97095	2.96755	9.15728	8.41671	4.7931	5.17179	9.29571	7.90418	50.5467	47.554	3.39905	3.32147	0.72246
ENSSSCG00000014170	CAST	33.3547	26.0382	29.3536	17.5469	43.329	32.2626	33.7128	32.0168	69.8794	64.7682	106.597	83.4401	122.726	110.053	62.6187
ENSSSCG00000009998	CASTOR1	44.1221	54.2552	43.7667	37.7973	70.8137	72.7898	46.8491	52.0288	68.3283	69.0148	101.667	98.9528	13.6707	13.3915	18.9988
ENSSSCG00000003407	CASZ1	0.744652	0.779778	1.23907	0.828163	1.23219	1.0114	0.669367	0.919977	1.74564	1.55216	0.798249	0.920733	0.0949473	0.0318283	0.896003
ENSSSCG00000013302	CAT	48.8807	50.5461	17.2642	37.8871	72.7898	52.4116	43.4725	60.6169	77.9542	57.2684	42.8508	28.1482	119.212	88.5783	61.1458
ENSSSCG00000016187	CATIP	0.543249	0.273027	1.09846	0.639117	0.725089	1.00612	0.459927	0.316957	0.914748	1.09076	0.784728	1.37972	0.358395	0.452514	0.590032
ENSSSCG00000004701	CATSPER2	2.63303	1.72617	3.97244	3.16497	2.8287	3.29142	2.00036	2.23021	1.91694	2.34245	2.71795	3.9193	1.20148	1.32317	1.61267
ENSSSCG00000002955	CATSPERG	1.038	0.621777	2.17877	0.989774	0.985162	1.17666	1.25455	1.36457	0.550133	0.746427	4.25712	7.67894	0.344807	0.660166	0.407492
ENSSSCG00000014633	CAVIN3	6.52354	10.9735	3.25998	1.77123	9.08276	4.41214	15.5981	12.1853	12.042	9.52343	11.0197	3.07204	43.5175	14.9547	50.7013
ENSSSCG00000027410	CBFA2T2	1.98587	2.12929	3.03933	1.72878	5.54279	3.89666	2.93896	2.09959	3.87419	3.47785	5.89144	4.84438	2.15018	1.94564	5.67482
ENSSSCG00000002648	CBFA2T3	30.1632	15.0077	17.9981	14.1425	0.282469	0.250162	0.228529	0.301838	0.870111	0.335964	0.116602	0.0797152	24.1026	16.6731	7.05091
ENSSSCG00000033811	CBFB	64.982	66.3318	39.006	61.6412	89.5112	56.1641	63.1346	65.4145	110.56	63.3791	84.6343	51.3987	68.1808	39.9099	114.585
ENSSSCG00000015115	CBL	14.7258	11.7705	19.9696	10.9902	18.8208	20.3983	8.00083	10.1014	19.2386	18.6005	16.8938	28.6008	16.499	21.6248	29.7436
ENSSSCG00000022486	CBLB	21.0012	10.35	16.0826	12.0881	14.0724	11.3015	22.6087	12.8324	20.7397	16.5882	7.86173	7.23365	7.69652	4.3982	35.0237
ENSSSCG00000028585	CBLL1	9.87078	7.79864	11.2018	12.3139	14.637	13.1356	11.7215	10.4062	17.4274	13.7032	13.8023	19.5992	12.9352	12.4964	15.033
ENSSSCG00000012053	CBR3	4.93988	10.9832	4.03984	7.27237	0.168741	0.103929	0.0967172	0.0297373	0.117739	0.0279161	0.159554	0.251127	0.963685	0.974963	0.352551
ENSSSCG00000009717	CBR4	9.36363	14.7058	10.3873	15.9629	12.7262	9.47657	10.1299	10.9992	12.3685	8.33739	8.4072	5.83652	9.04793	9.12974	8.49618
ENSSSCG00000017529	CBX1	23.3273	21.065	12.5436	16.1527	20.7749	14.1368	21.1242	19.07	16.2115	11.6596	25.4207	20.2244	10.6449	8.16502	40.9338
ENSSSCG00000024261	CBX2	6.28584	3.12265	3.66133	4.14159	6.43035	5.66888	4.34611	5.1078	6.12095	4.15622	2.61059	1.80027	0.990501	1.15556	12.1696
ENSSSCG00000017160	CBX4	27.2667	25.2783	32.3212	19.0586	85.9212	92.7428	58.7455	44.5112	81.875	72.8579	50.8198	61.9267	19.7457	31.5884	68.1185
ENSSSCG00000039191	CBX5	33.0866	15.2366	12.234	18.6839	20.539	15.3062	12.0087	11.344	26.7461	17.5747	20.6497	21.3198	6.16917	4.37577	48.6181
ENSSSCG00000040334	CBX6	9.20961	9.61198	9.1031	8.32159	20.9212	11.5219	20.6914	12.8608	21.88	11.8866	19.9658	9.30741	5.54612	3.82201	21.5841
ENSSSCG00000034146	CBX8	2.31492	3.13755	2.49617	2.94942	4.55368	4.07558	5.52492	4.40736	4.58239	2.7798	2.48864	2.12293	3.0872	1.91559	3.36034
ENSSSCG00000013761	CC2D1A	14.5188	8.23543	15.7485	7.21485	11.8124	12.8547	14.0547	11.9583	13.1879	13.5615	16.1878	18.2088	9.16685	9.97177	11.9831
ENSSSCG00000003862	CC2D1B	21.2368	14.4098	27.985	12.5078	32.9075	35.5083	27.5143	21.0707	30.6914	35.0352	33.4388	41.5983	12.4042	14.9371	18.6198
ENSSSCG00000010243	CCAR1	45.6939	12.9101	46.3406	25.6017	46	48.4259	29.5104	17.08	35.3471	51.5	52.5092	70.6246	28.0887	33.4498	43.6869
ENSSSCG00000009628	CCAR2	45.6137	27.5954	44.9485	24.3482	59.5164	51.6786	45.5913	30.86	59.3164	43.1435	64.4506	59.6346	31.354	31.2214	50.5781
ENSSSCG00000028723	CCDC102A	4.37339	17.2656	1.85457	1.73427	19.1809	14.1764	7.08822	5.15494	13.5524	9.403	35.3809	26.0555	0.995549	0.94539	1.52525
ENSSSCG00000005313	CCDC107	16.4928	33.1206	15.401	27.0969	17.2311	29.0877	24.9043	39.6268	16.0222	24.4035	22.7132	24.0051	11.7407	10.9427	11.5837
ENSSSCG00000029866	CCDC112	5.25487	1.02196	0.27531	0.0844316	5.18924	3.89964	1.40713	1.28011	2.62535	3.02147	6.89472	7.82916	2.21514	4.33821	1.83494
ENSSSCG00000035628	CCDC115	19.1428	26.9995	17.1972	30.9322	21.2074	23.3525	24.2667	29.1876	34.9154	38.8995	21.7165	20.674	48.4892	49.8833	33.3455
ENSSSCG00000032261	CCDC117	30.0375	19.5517	17.0648	23.2274	19.4961	12.9854	14.4315	13.1292	21.1522	17.7958	23.7429	15.1688	20.8741	15.1776	32.9071
ENSSSCG00000011329	CCDC12	33.2221	21.6845	25.7781	20.8736	21.8271	18.8043	16.6022	16.4255	24.0317	27.1658	25.601	27.1492	25.7264	30.5697	38.8105
ENSSSCG00000012288	CCDC120	3.09339	4.75513	4.35129	4.28291	6.01899	4.70236	5.84364	6.21434	5.6295	3.76658	6.97993	6.59426	1.68516	1.50608	6.32662
ENSSSCG00000013891	CCDC124	24.7968	28.5438	21.7263	24.6824	26.5269	25.405	26.5708	23.3581	31.6464	29.104	26.5751	23.1073	32.4218	29.9261	29.5201
ENSSSCG00000016963	CCDC125	12.5362	14.2681	19.88	15.4143	4.09304	3.81395	5.16444	5.02504	5.79587	4.65045	9.17025	10.5937	4.56219	5.21528	3.91045
ENSSSCG00000029174	CCDC126	3.16584	11.0063	3.79908	10.1927	5.29854	5.11801	4.73595	6.86142	5.91718	6.73558	6.62237	6.83641	7.31468	5.58644	4.13372
ENSSSCG00000036783	CCDC127	14.2185	22.6284	11.7323	16.4955	19.405	18.2433	21.806	24.358	18.6984	16.2959	18.5293	11.4768	13.5109	14.4204	18.5406
ENSSSCG00000013755	CCDC130	18.5359	10.7188	18.6465	10.9708	14.8163	17.0712	12.4569	10.0309	13.1055	14.6785	15.6155	15.1161	12.8486	12.505	16.3457
ENSSSCG00000035565	CCDC134	4.42539	4.77185	3.53774	3.22548	5.24675	4.70898	4.50567	3.66969	4.01659	3.23176	5.1801	4.51715	6.53552	6.13851	3.14379
ENSSSCG00000034716	CCDC137	26.7166	11.8393	25.6017	17.5139	18.8951	28.1126	23.582	16.6169	15.1642	23.8079	21.079	30.9814	9.40235	13.3609	22.9798
ENSSSCG00000008135	CCDC138	0.17688	0.12054	1.43582	0.50534	0.636346	0.264292	0.735712	0.238891	0.115119	0.17531	0.275358	0.20344	0.0914813	0.0571088	0.189073
ENSSSCG00000025349	CCDC14	3.51048	1.06585	3.29835	2.19395	4.96957	5.10814	3.95722	3.06823	2.64427	3.61953	4.32	4.31285	2.37564	1.88989	6.04502
ENSSSCG00000008270	CCDC142	8.81739	8.62319	7.87429	11.4091	6.74462	6.62545	7.95239	9.11484	7.97905	9.32387	7.38337	8.46136	11.3225	11.4349	10.456
ENSSSCG00000015412	CCDC146	0.0487261	3.21495	0.00331914	0.114877	0.183428	0.0999408	0.0907899	0.119695	0.00170735	0.00247515	0.0011845	0.00498369	0.0730979	0.0492877	0.106997
ENSSSCG00000023001	CCDC149	3.539	4.49616	15.2845	7.14941	7.30066	7.717	2.91201	2.52048	4.70146	6.07413	9.68346	14.2518	0.425181	0.319342	0.432438
ENSSSCG00000015206	CCDC15	2.63124	2.56057	4.32803	2.75793	3.29276	3.97619	2.43981	2.09779	2.58522	4.10667	3.83152	4.72751	1.98765	2.87761	3.11066
ENSSSCG00000016069	CCDC150	10.1662	10.2357	15.5847	12.7751	12.5633	17.4599	8.97181	6.43526	9.16534	16.4896	17.3783	25.6442	3.34824	4.66067	9.91355
ENSSSCG00000008983	CCDC158	0.0209219	0.117127	0.0503667	0.0712016	0.0861772	0.0237672	0.0644846	0.145102	0.0416689	0.136181	1.36404	1.48277	0.0420674	0.158705	0.0204029
ENSSSCG00000036178	CCDC167	2.20014	10.5343	2.28316	8.41423	1.88491	2.78251	2.14892	5.25073	1.60812	3.34177	1.64743	2.26475	1.11978	1.34964	2.54142
ENSSSCG00000004087	CCDC170	0.348447	0.187871	0.804662	0.716505	0.00387933	0.0433832	0.00132549	0.00422539	0.0253315	0.00247515	0.0304372	0.0745495	3.40854	5.12023	0.00079626
ENSSSCG00000040702	CCDC174	16.7986	15.4061	20.5974	15.0366	25.5729	23.7659	24.624	17.6667	21.9617	24.9504	30.2632	26.0749	22.0784	26.2681	23.817
ENSSSCG00000006897	CCDC18	5.34148	0.613795	7.09987	4.19051	4.78384	5.30569	3.10967	2.37241	2.73677	4.38858	5.19986	8.01052	1.58292	2.68642	4.68349
ENSSSCG00000028804	CCDC181	2.09732	1.1446	1.95485	2.95536	0.268793	0.248765	0.240997	0.822793	1.12796	0.333834	0.0492055	0.0800495	0.0897576	0.0533592	9.68735
ENSSSCG00000010648	CCDC186	7.5484	5.34685	15.675	7.63303	12.4155	13.3626	4.07695	5.49858	11.916	17.384	13.755	30.8363	13.553	16.1889	18.0323
ENSSSCG00000007778	CCDC189	1.22992	1.28678	1.64275	1.11525	4.07135	2.97394	1.9093	0.804966	1.71483	2.24883	1.3571	1.5018	0.848742	0.910386	1.48405
ENSSSCG00000011913	CCDC191	2.43536	0.557524	3.51157	1.74435	1.89089	2.07562	1.73008	1.31652	1.14516	1.66278	2.41538	3.20419	1.33816	2.2736	1.40274
ENSSSCG00000012297	CCDC22	8.9377	7.31287	7.33308	6.16959	6.58042	6.22871	7.76558	6.7429	7.63064	7.20182	5.96968	6.47273	10.8716	10.3668	7.7694
ENSSSCG00000034727	CCDC24	1.79124	1.75369	3.1152	1.82883	1.91416	2.65028	1.55167	1.91791	2.03601	2.34091	2.04612	2.85433	1.40822	1.88628	1.09637
ENSSSCG00000024972	CCDC25	24.3165	25.9124	24.4097	27.5544	29.4668	19.2278	20.0238	20.3849	33.5057	36.6711	28.3743	25.1869	31.2696	35.4423	35.9373
ENSSSCG00000004148	CCDC28A	13.0733	22.5931	14.2191	33.5952	11.2011	14.5324	16.6411	23.2609	13.7809	18.3708	11.1012	10.3289	24.1326	25.4319	14.2735
ENSSSCG00000031514	CCDC28B	9.50069	31.4667	8.02486	14.7987	9.10225	10.3346	8.62656	10.9692	17.7919	16.7103	36.677	44.232	13.413	12.2304	6.69981
ENSSSCG00000038033	CCDC32	21.8353	31.2611	20.5399	35.0192	23.2892	23.3395	25.4355	32.6578	24.2156	21.7564	26.5021	21.0129	21.8676	20.8666	23.2772
ENSSSCG00000013336	CCDC34	10.9794	17.38	10.0729	15.8896	10.3745	9.10847	10.7959	10.3418	7.50442	11.9901	6.82762	6.72823	2.09548	2.41074	18.0767
ENSSSCG00000017352	CCDC43	13.2695	7.35458	15.9465	11.0355	9.39976	10.4027	9.14178	10.3067	9.09003	10.6065	10.6824	12.8708	10.0011	10.0466	9.79323
ENSSSCG00000028698	CCDC47	16.0404	18.2623	13.9258	18.5937	18.7379	13.7183	16.0501	15.9751	16.6156	15.518	14.6689	13.617	30.0257	32.4926	18.5973
ENSSSCG00000036423	CCDC50	27.0186	18.6942	39.5982	39.4441	15.2176	12.2051	14.5285	13.1252	35.0102	34.3891	16.708	9.04445	72.3334	54.2432	35.6833
ENSSSCG00000011350	CCDC51	12.1042	18.0645	11.3295	15.3833	15.945	14.0295	13.8898	18.8639	11.2096	11.0918	13.9847	12.6558	8.96817	6.79655	14.4444
ENSSSCG00000025107	CCDC58	18.8849	27.7594	12.6467	35.6866	15.2332	17.3873	19.337	20.063	12.9434	13.2162	12.6615	10.88	22.1709	21.949	12.886
ENSSSCG00000038987	CCDC59	4.67711	9.00476	5.14264	10.471	5.95366	4.75251	6.44347	5.77835	4.62419	5.88678	6.2271	5.8858	6.22841	5.5973	5.90677
ENSSSCG00000010211	CCDC6	29.0919	11.3187	35.062	18.4743	8.79175	8.3745	8.99901	5.61365	7.88468	8.79554	6.90356	7.07904	12.4757	13.776	6.85289
ENSSSCG00000009842	CCDC60	0.119049	0.468332	0.0302406	0.0479269	0.00387933	0.0867494	0.0448643	0.0531214	0.104698	0.0488308	0.288899	0.278262	8.15593	6.46498	0.0411374
ENSSSCG00000003100	CCDC61	24.9215	12.4132	32.0702	15.4062	23.9505	30.4853	18.6875	14.8169	17.1105	23.6434	23.5385	32.4988	7.43048	8.8576	15.0502
ENSSSCG00000009787	CCDC62	20.1156	9.70104	22.1664	12.8381	4.93751	5.14403	7.76908	8.1776	4.51799	4.50607	6.49352	8.82397	5.19649	7.38114	19.3865
ENSSSCG00000000179	CCDC65	0.382075	0.310167	0.109137	0.00916371	3.5081	2.46612	5.7288	10.2232	1.86341	2.21403	0.521849	0.722268	0.123579	0.128529	1.34944
ENSSSCG00000021439	CCDC66	15.8784	3.7197	15.6208	8.40561	23.2003	29.5789	12.4747	9.36336	14.6892	32.7851	18.0272	32.8084	6.3035	8.38719	12.2021
ENSSSCG00000040411	CCDC69	65.1911	29.3866	61.7852	30.8795	59.4439	60.4335	62.9571	42.8214	78.3387	73.0036	61.5954	56.8135	27.367	29.4649	61.9158
ENSSSCG00000011378	CCDC71	11.1925	11.6905	9.70006	11.8206	17.869	8.12275	17.9407	16.0902	15.2494	6.64508	18.3468	9.40509	9.68026	8.49303	16.656
ENSSSCG00000000751	CCDC77	7.79129	3.00562	8.98691	4.95291	5.66502	7.41204	4.65657	3.6493	3.77272	6.03911	5.48419	8.94616	1.14847	2.39192	8.77413
ENSSSCG00000011928	CCDC80	0.850023	1.15143	0.0751369	0.343927	0.0794939	0.0141189	0.279467	0.262361	0.442288	0.380506	0.0634401	0.055402	0.0984504	0.0720122	0.338776
ENSSSCG00000014917	CCDC81	2.92767	0.840176	4.04159	1.0731	3.15288	3.49336	1.64168	1.12414	2.31187	3.69024	4.53513	5.3924	0.645349	1.28909	1.26528
ENSSSCG00000014972	CCDC82	59.4692	43.0549	50.781	43.2649	34.9918	37.0208	30.3945	33.8436	30.5854	49.3922	73.8801	94.8778	30.1289	30.5922	45.1024
ENSSSCG00000015102	CCDC84	10.1747	4.28563	11.6696	7.88973	10.8034	14.2206	10.3573	6.53068	10.0957	18.2031	11.9856	15.7663	2.79377	5.86708	8.90528
ENSSSCG00000012968	CCDC85B	11.5648	24.6193	10.2181	16.7676	29.3411	28.7758	49.4661	41.8853	29.0249	38.6463	28.1798	18.7439	32.5518	24.3641	40.2891
ENSSSCG00000008406	CCDC88A	8.58612	1.06965	0.54804	0.17362	2.31456	2.97193	0.33336	0.264379	1.2512	1.66687	1.4765	2.50669	45.6463	69.5549	5.9372
ENSSSCG00000002440	CCDC88C	15.4656	10.1173	13.2107	6.03691	34.4377	40.7374	24.7896	25.5528	32.5789	24.3387	29.0667	33.4388	10.3487	16.1789	31.026
ENSSSCG00000024240	CCDC9	36.8497	23.492	47.1198	24.3941	34.2336	45.2755	37.6939	24.7403	34.6721	36.2449	47.7857	53.479	24.6218	28.0047	27.5887
ENSSSCG00000014903	CCDC90B	24.1808	25.0124	28.138	36.8262	34.0468	29.4062	22.9177	34.2351	24.2862	35.8419	24.3551	23.0908	21.1589	25.1986	24.6661
ENSSSCG00000024232	CCDC91	2.00055	3.3793	1.08216	0.898968	6.10839	5.34201	3.17883	2.82976	4.13253	4.15255	8.87041	8.47555	14.2103	15.308	5.61245
ENSSSCG00000015714	CCDC93	10.9116	9.78405	16.1691	11.5767	16.8149	16.2477	16.5477	11.4992	17.4094	19.972	20.1666	24.1232	22.9519	25.552	16.5773
ENSSSCG00000003016	CCDC97	19.4267	20.2317	17.4612	14.3909	36.4169	29.4197	31.4398	24.6451	42.6453	33.9918	28.3446	23.8969	23.7398	23.8253	29.8391
ENSSSCG00000023975	CCDC9B	0.0138049	0.0117741	0.00331914	0.00916371	0.00387933	0.00100702	0.00132549	0.00422539	0.00941124	0.00247515	0.0011845	0.00498369	1.05259	1.60581	0.00079626
ENSSSCG00000001391	CCHCR1	8.0777	2.74837	6.88633	4.93458	17.1242	19.2161	5.73967	3.71605	9.70819	12.6257	4.34811	4.53842	4.87361	5.32843	5.07673
ENSSSCG00000034722	CCL14	0.0610418	0.0117741	0.0742287	0.00916371	0.00387933	0.364586	0.00132549	0.00422539	0.00170735	0.605859	0.0643802	0.00498369	106.27	114.604	0.00079626
ENSSSCG00000038162	CCL21	0.0616129	0.0117741	0.276236	0.0980498	0.403478	0.291876	0.38801	0.0337791	0.138115	0.198512	0.147241	0.224064	6.88018	6.2331	0.302465
ENSSSCG00000017700	CCL3L1	5.67359	17.8441	0.854706	1.18604	0.00387933	0.00100702	12.3924	5.03879	0.260656	0.994611	0.221431	0.61304	1.48047	2.2941	115.296
ENSSSCG00000017700	CCL3L1	5.67359	17.8441	0.854706	1.18604	0.00387933	0.00100702	12.3924	5.03879	0.260656	0.994611	0.221431	0.61304	1.48047	2.2941	115.296
ENSSSCG00000017700	CCL3L1	5.67359	17.8441	0.854706	1.18604	0.00387933	0.00100702	12.3924	5.03879	0.260656	0.994611	0.221431	0.61304	1.48047	2.2941	115.296
ENSSSCG00000017705	CCL5	246.3	126.625	2.87981	5.00024	1.99225	8.20559	4071.99	1161.56	68.8098	87.9299	34.7249	6.55254	1.54374	1.56039	7365.14
ENSSSCG00000040648	CCL8	0.0765762	0.0816359	0.0646863	0.00916371	0.0511387	0.16979	0.0247195	0.00422539	0.0456519	0.0687783	0.0841583	0.308918	1.75798	7.20827	0.0999065
ENSSSCG00000016734	CCM2	55.9695	42.6597	68.0619	40.093	78.2638	80.9202	60.4414	43.9907	67.8131	60.0397	59.6346	62.7559	42.2704	44.181	49.0974
ENSSSCG00000007239	CCM2L	0.630628	0.631514	0.427128	0.629852	0.114675	0.0917011	0.103829	0.0265986	0.010701	0.0826955	0.0615736	0.220709	4.15364	4.36197	0.0473933
ENSSSCG00000006002	CCN3	1.72155	3.6829	0.00331914	0.00916371	0.00387933	0.00100702	0.00132549	0.00422539	0.00170735	0.00247515	0.0011845	0.00498369	0.0181681	0.0483274	0.00079626
ENSSSCG00000029326	CCNB1	16.6927	16.8063	7.73623	21.5202	3.51712	3.25894	4.5494	4.56298	9.86893	8.72529	2.65954	2.74116	0.0895775	0.221704	38.3379
ENSSSCG00000002144	CCNB1IP1	13.859	33.2572	29.1304	44.6976	19.6237	41.5948	24.8466	51.6017	13.6992	33.1855	19.9176	44.2023	15.6285	22.8002	15.2837
ENSSSCG00000004588	CCNB2	13.5566	11.8737	4.57766	16.1225	2.66414	2.09839	4.00895	2.5929	9.46393	7.42816	0.796501	0.739891	0.138814	0.13795	45.3572
ENSSSCG00000004353	CCNC	50.4085	44.0747	39.51	62.6472	58.4805	65.6064	38.4511	50.9905	49.5013	73.9587	51.19	66.9413	48.1802	45.9883	48.9182
ENSSSCG00000038694	CCND2	18.9462	17.3667	23.8234	20.6316	47.4384	36.4169	49.9985	25.4539	33.256	23.7886	55.2768	33.7392	0.263763	0.273189	52.2948
ENSSSCG00000038694	CCND2	18.9462	17.3667	23.8234	20.6316	47.4384	36.4169	49.9985	25.4539	33.256	23.7886	55.2768	33.7392	0.263763	0.273189	52.2948
ENSSSCG00000032284	CCND3	307.361	304.505	126.353	138.042	413.851	277.709	440.17	327.117	471.714	293.308	436.444	234.614	464.168	282.202	569.192
ENSSSCG00000034771	CCNDBP1	41.5526	49.992	44.3366	56.029	43.9494	48.179	36.7017	47.4977	43.0687	51.0134	47.6605	46.0757	40.5754	45.5698	31.5464
ENSSSCG00000006095	CCNE2	21.0061	14.0439	22.9935	29.9562	6.02303	5.18924	5.00722	5.72682	9.49707	12.0557	5.79785	5.15472	0.605286	0.636461	23.7331
ENSSSCG00000026326	CCNF	4.90846	2.20742	1.36004	3.45186	0.838937	0.33891	1.16034	0.55173	4.20017	2.29223	0.320942	0.0531475	0.00154798	0.0023305	17.3445
ENSSSCG00000017024	CCNG1	192.395	296.465	202.894	388.076	220.999	256.244	166.529	333.667	198.805	195.984	196.213	243.228	328.944	212.783	237.25
ENSSSCG00000008988	CCNG2	35.8039	19.2792	44.6277	38.7714	19.1137	20.4039	24.344	21.132	22.7931	22.8741	26.4355	28.986	19.0536	31.1005	49.2692
ENSSSCG00000014147	CCNH	25.6167	37.4927	30.5706	45.2591	22.4796	40.0565	18.0165	28.9829	25.4028	44.1915	26.097	51.0123	27.6016	31.6761	30.1009
ENSSSCG00000008987	CCNI	210.423	134.483	193.984	172.334	212.069	126.247	232.907	134.317	214.591	110.943	178.515	116.303	372.058	228.727	312.503
ENSSSCG00000010502	CCNJ	4.14301	2.95173	4.29152	3.70696	7.68989	7.26169	4.75204	4.61118	4.71714	5.39321	8.40136	10.9063	2.53187	2.9751	3.32452
ENSSSCG00000002509	CCNK	17.9595	15.9119	14.6231	16.4683	24.231	17.7116	17.2205	16.9179	29.5686	22.3615	24.8344	22.1655	26.5409	23.0546	22.8871
ENSSSCG00000029352	CCNL1	280.612	41.6342	423.069	101.795	276.857	352.9	154.42	67.7125	146.541	380.115	297.916	489.292	89.8279	255.58	145.239
ENSSSCG00000003354	CCNL2	165.086	39.3666	192.078	64.7375	133.4	167.527	99.4645	52.2409	101.939	157.975	144.56	227.26	54.1104	82.6213	80.2686
ENSSSCG00000012770	CCNQ	15.7028	29.2782	14.6116	23.477	15.2969	24.7992	20.0119	23.1644	15.0474	26.3437	20.0381	21.0909	13.8169	11.4188	17.3539
ENSSSCG00000038181	CCNT1	14.876	9.99723	15.5786	13.7396	23.1799	22.2633	17.0361	12.7591	20.4255	19.8856	27.0324	28.2739	8.01036	10.3938	18.2114
ENSSSCG00000015697	CCNT2	23.4454	7.6714	32.6813	15.3704	24.1155	36.9576	8.60052	8.03551	18.1664	30.6914	24.9144	53.6569	10.7821	18.8406	14.1855
ENSSSCG00000011107	CCNY	30.7782	29.1812	35.2282	31.0215	40.2793	32.4358	39.0973	39.5147	37.8686	39.4662	43.1803	34.6647	44.3404	42.5649	44.2067
ENSSSCG00000024696	CCNYL1	5.3536	3.78649	11.9377	7.01011	11.3589	11.6723	8.97871	8.19034	30.4026	37.2693	9.05118	11.1368	5.33389	5.60232	4.18089
ENSSSCG00000023829	CCP110	15.1604	4.42747	12.4699	9.40338	13.3816	12.999	8.01338	6.12918	12.0812	13.0864	12.7933	17.4226	3.34543	3.8461	22.7037
ENSSSCG00000004610	CCPG1	22.3228	21.6541	19.5396	20.6511	28.2109	23.3756	26.4225	24.624	39.1834	31.5373	35.4597	30.9196	173.704	143.627	35.9648
ENSSSCG00000011322	CCR1	2.2776	2.09121	2.90747	6.45333	0.230788	0.234637	0.00132549	0.0251233	0.893631	0.823653	1.15899	0.170344	82.0725	54.6101	0.362803
ENSSSCG00000017392	CCR10	2.74097	11.2969	1.93826	7.54784	0.203504	0.320665	0.266304	0.340877	1.62888	1.43989	6.38336	2.41011	0.0656383	0.181042	1.44587
ENSSSCG00000024311	CCR2	10.2594	15.5965	0.791847	2.26945	16.8314	9.17284	19.5047	12.3718	63.3192	31.9013	33.906	4.40858	421.387	224.403	1.97558
ENSSSCG00000034660	CCR4	5.54047	9.43095	4.94289	16.7908	46.9306	19.647	3.59652	2.72602	149.776	55.0177	21.6693	2.44467	0.0202615	0.058466	0.905727
ENSSSCG00000024344	CCR5	2.83188	4.27182	0.34338	1.1342	4.55567	3.17718	55.5387	25.4046	32.6087	33.2174	6.48961	1.77197	26.3051	15.0095	79.4445
ENSSSCG00000024562	CCR6	19.9597	20.9255	36.4717	20.7696	6.81578	2.11724	0.74702	0.8356	21.4547	8.03469	54.0188	30.235	0.618143	0.571334	1.38196
ENSSSCG00000017466	CCR7	3.14073	23.1092	20.515	15.4854	329.964	180.935	154.124	130.382	146.366	75.5007	28.9503	25.1313	0.447247	0.293778	1.05737
ENSSSCG00000025846	CCR8	0.285622	0.167633	0.00331914	0.00916371	0.106329	0.171211	1.2557	0.140223	0.733116	1.27387	5.68761	1.26869	0.89173	0.23113	0.863599
ENSSSCG00000011316	CCR9	9.46802	12.6062	9.3667	14.7554	6.26385	2.6053	22.8269	18.9048	6.88479	2.45882	2.28055	0.327949	0.171315	0.0509525	6.33377
ENSSSCG00000023557	CCRL2	2.36667	3.33738	1.52641	4.07736	0.383297	0.538346	8.2227	7.87703	1.11731	0.852135	1.29074	0.194725	48.0216	44.6754	17.1862
ENSSSCG00000012934	CCS	37.3003	66.5319	33.5794	43.0949	58.72	71.7266	46.751	66.339	52.1105	54.412	47.8887	48.7507	40.8971	40.1643	43.8507
ENSSSCG00000023776	CCSAP	8.89086	6.52101	8.42221	11.3177	31.9498	28.2954	30.3255	27.2586	25.6444	27.3115	4.47486	3.76833	5.82229	3.2487	33.5336
ENSSSCG00000022986	CCSER1	0.165611	0.153308	0.0222472	0.00916371	0.0619326	0.00100702	0.00132549	0.00422539	0.0984222	0.0407481	0.111195	0.0563426	5.00431	7.95561	0.00079626
ENSSSCG00000010351	CCSER2	11.9851	11.3626	18.3555	12.741	18.0702	28.2837	10.2196	15.6213	25.9038	39.2252	15.5224	33.3219	9.45548	12.3405	20.7784
ENSSSCG00000000496	CCT2	118.452	192.207	120.24	220.417	104.682	123.322	111.039	178.424	101.751	125.195	112.438	122.417	113.372	103.138	104.321
ENSSSCG00000006487	CCT3	159.893	165.523	119.2	166.118	132.997	115.873	151.623	173.393	139.044	119.296	140.074	104.176	140.235	119.92	147.536
ENSSSCG00000008377	CCT4	85.6378	113.93	75.0797	127.148	82.8897	87.9754	82.1309	109.715	70.9762	89.0894	81.4586	75.822	70.021	63.9145	85.3931
ENSSSCG00000024126	CCT5	115.099	104.009	89.3536	84.9246	112.745	83.0392	118.86	96.5163	112.212	95.3844	123.573	97.1399	91.193	78.9096	119.845
ENSSSCG00000008303	CCT7	47.5569	72.566	36.0801	62.7416	43.5765	42.3308	48.9048	58.5017	45.9194	46.3561	45.4375	36.677	45.4785	41.686	52.4358
ENSSSCG00000026761	CCT8	195.627	194.517	142.806	240.977	167.972	143.675	164.774	179.645	168.388	153.234	156.706	120.191	179.035	148.002	204.948
ENSSSCG00000004485	CD109	0.313475	0.500049	0.0831521	0.1151	0.203942	0.12781	0.395	0.452696	0.790914	0.824603	0.264734	0.250386	0.0788319	0.138271	1.55603
ENSSSCG00000014369	CD14	0.0564534	0.114073	0.382775	0.427128	0.181102	0.194372	0.466449	0.372922	0.618657	0.726683	0.197659	0.328439	102.309	44.8027	0.0763078
ENSSSCG00000012840	CD151	3.90127	9.5732	1.27041	3.08278	8.78419	8.46245	9.4993	9.88324	14.8226	11.316	7.74678	4.67606	7.51851	5.16653	16.0608
ENSSSCG00000033146	CD163	0.014698	0.037339	0.0671548	0.0443572	0.0501843	0.318826	0.00132549	0.0366252	0.0611628	0.247118	0.0731034	0.0445098	207.653	126.605	0.140358
ENSSSCG00000004414	CD164	79.2281	88.4229	49.2598	96.1952	75.8139	59.7492	83.1029	88.5548	151.742	122.895	74.1102	55.365	514.856	325.727	174.632
ENSSSCG00000003575	CD164L2	0.39214	0.279677	0.44903	0.00916371	0.212368	0.383297	0.111504	0.0797473	0.0251884	0.342585	0.0160386	0.239963	4.46863	0.985729	0.233703
ENSSSCG00000016957	CD180	38.5398	23.2831	29.0291	41.7652	2.17928	1.50633	1.45656	1.92617	2.27957	1.13819	0.0670946	0.0426657	40.9316	24.1705	1.63097
ENSSSCG00000007807	CD19	79.4377	33.373	142.284	80.7879	0.410469	0.725089	0.79775	0.982182	0.249961	0.266018	0.421981	0.753977	0.398855	0.466161	3.95129
ENSSSCG00000006450	CD1E	1.0819	0.276587	0.0892686	0.00916371	0.0229532	0.0193073	0.542086	0.775101	1.7811	0.237315	0.0184688	0.0286467	0.893495	1.25195	5.9604
ENSSSCG00000006736	CD2	35.9588	32.5305	17.7295	23.6527	698.014	381.706	436.389	346.399	689.003	479.118	7.55995	3.53728	8.1094	7.77615	418.86
ENSSSCG00000027820	CD200	2.01554	1.1339	3.3854	3.64486	1.05577	1.67602	10.2232	15.2781	1.0325	1.03013	0.278937	0.221817	1.90258	0.638481	0.645199
ENSSSCG00000011925	CD200R1	49.2217	41.0173	8.94602	13.8253	5.98246	8.76805	4.28883	9.85475	7.4002	11.4509	7.60805	10.6596	24.2835	34.4566	5.00098
ENSSSCG00000011925	CD200R1	49.2217	41.0173	8.94602	13.8253	5.98246	8.76805	4.28883	9.85475	7.4002	11.4509	7.60805	10.6596	24.2835	34.4566	5.00098
ENSSSCG00000008319	CD207	0.576659	0.538111	0.00331914	0.211449	0.0791658	0.0253589	0.00132549	0.0644846	0.00170735	0.00247515	0.0011845	0.0516334	22.0138	10.8569	0.00079626
ENSSSCG00000002893	CD22	95.9372	24.0619	167.581	54.5249	1.08357	1.40748	1.98464	2.05936	0.963652	0.53295	0.302259	0.338254	16.9049	15.5947	4.2199
ENSSSCG00000038398	CD226	4.93045	4.79491	2.068	2.60877	31.3	20.9129	41.3323	52.1334	59.4897	47.5012	12.3835	8.63689	0.216214	0.0023305	146.615
ENSSSCG00000006374	CD244	5.88898	3.49684	0.00331914	0.0934311	0.0722321	0.564736	26.0511	21.4857	2.14649	3.87419	0.628099	0.292265	63.4119	36.2377	207.772
ENSSSCG00000006309	CD247	22.0527	315.636	7.45049	8.74697	317.311	254.753	223.38	251.161	244.463	211.961	882.719	539.823	10.8386	8.63929	158.771
ENSSSCG00000000705	CD27	5.26715	141.554	0.00331914	0.658974	282.075	279.928	482.852	511.31	97.5112	96.5777	231.663	278.878	0.00154798	0.103113	88.5703
ENSSSCG00000005211	CD274	0.945619	1.50272	1.16933	1.91386	0.962639	1.26413	0.363064	0.505413	1.62082	3.16174	0.285621	0.527667	0.495472	1.02046	0.175064
ENSSSCG00000001917	CD276	2.58057	3.05284	2.75969	2.35853	0.620851	0.715858	0.623835	0.911824	0.480354	0.249961	2.95085	1.7242	5.02376	3.85339	1.15783
ENSSSCG00000028561	CD28	0.430475	1.39212	0.483846	0.397983	47.8684	43.2008	17.1854	20.0549	69.0148	65.478	1.06966	1.32823	0.32187	0.301496	0.913029
ENSSSCG00000030197	CD2AP	12.3502	3.79479	23.3495	14.678	1.93343	1.69191	3.53204	2.48227	2.67495	1.06281	3.25382	3.05507	20.022	23.4776	37.2111
ENSSSCG00000007791	CD2BP2	23.2678	31.0244	18.7358	29.528	18.4566	15.0854	19.5973	20.9132	18.313	13.5899	18.1343	11.4176	19.384	15.8865	29.233
ENSSSCG00000017236	CD300C	35.2089	4.84344	22.5547	1.12278	1.60364	0.330855	2.31233	0.00422539	2.9011	0.193185	0.296538	0.13796	193.996	175.905	4.12907
ENSSSCG00000017237	CD300LB	2.07845	0.633642	1.67804	0.91538	0.00387933	0.138258	0.00132549	0.00422539	0.00170735	0.00247515	0.0764606	0.00498369	37.6085	42.6832	0.00079626
ENSSSCG00000036050	CD302	12.8756	12.1843	21.903	26.3552	0.202773	0.144013	0.248158	0.317608	0.529977	0.25804	0.0527201	0.183121	29.3224	23.9514	3.26701
ENSSSCG00000032833	CD320	2.58646	8.81064	2.04794	5.37122	4.39351	3.52361	6.36839	9.03603	2.36164	3.77448	2.70542	4.21335	2.16504	3.07829	1.78855
ENSSSCG00000039946	CD34	2.37664	1.55669	0.0292044	0.111722	0.12986	0.1133	0.090294	0.0387348	0.0300914	0.0471978	0.0333854	0.0235579	1.46749	1.30874	0.0586035
ENSSSCG00000015405	CD36	5.56466	6.13282	0.00331914	0.0561159	0.0682871	0.216869	0.00132549	0.00422539	0.0151799	0.0741884	0.0011845	0.0849807	75.3312	45.6297	0.0695243
ENSSSCG00000033849	CD37	43.9179	50.9279	90.3072	58.6726	72.1129	57.1954	68.4044	56.7834	87.158	52.7876	88.9851	53.5941	70.7368	57.1178	66.7058
ENSSSCG00000008742	CD38	80.6465	82.886	102.249	107.644	84.9895	78.0292	84.9305	88.392	89.1489	78.7888	109.087	81.5139	12.0513	15.6378	84.2245
ENSSSCG00000015093	CD3D	26.9878	152	0.715162	1.52482	434.482	263.883	328.175	294.884	404.609	289.049	584.332	398.68	0.13795	0.496359	286.547
ENSSSCG00000040140	CD3E	30.8014	210.423	0.226266	1.15278	629.976	401.129	602.973	437.056	554.467	424.739	810.398	518.376	0.0329968	0.238834	116.099
ENSSSCG00000020754	CD3EAP	3.31504	5.90644	2.58425	5.32187	5.03696	3.55361	5.42744	3.96954	4.41446	3.5012	3.59633	2.22237	2.98735	2.00544	3.58829
ENSSSCG00000015094	CD3G	32.4944	277.397	0.772401	2.01822	377.26	392.926	380.903	591.743	274.335	396.532	467.326	439.185	0.22788	0.471427	432.34
ENSSSCG00000000687	CD4	0.749875	3.63651	0.0974652	0.105132	284.797	237.698	1.17388	1.56863	329.767	254.921	1.01843	0.765292	70.4217	61.8139	32.3656
ENSSSCG00000035078	CD40	24.6675	27.9111	51.7905	60.2188	0.0411064	0.211117	0.295032	0.167088	0.0655314	0.089321	0.0686291	0.225117	4.11773	6.91312	1.12454
ENSSSCG00000030172	CD40LG	0.202679	0.495347	0.0298786	0.00916371	53.19	57.8391	9.58004	5.7707	104.339	129.931	1.23352	0.830594	0.0302774	0.0505664	0.717139
ENSSSCG00000013297	CD44	47.2804	73.7514	35.6516	37.2594	112.378	70.7383	136.101	86.529	172.408	88.5363	190.595	99.9556	170.137	127.176	158.987
ENSSSCG00000011942	CD47	119.51	89.997	87.0347	115.755	126.933	115.456	62.3334	89.9169	144.649	121.918	92.2799	85.1188	220.324	159.746	198.941
ENSSSCG00000006379	CD48	341.161	394.818	293.364	436.841	261.543	195.942	302.663	284.377	420.221	340.25	490.036	300.016	650.483	492.457	209.592
ENSSSCG00000013115	CD5	3.2985	21.3474	0.898968	1.5239	179.064	133.4	81.5071	81.3668	188.971	141.242	39.3453	30.1273	2.75664	1.4666	7.0037
ENSSSCG00000006800	CD53	396.082	621.897	390.2	787.635	535.233	411.858	549.493	588.728	712.541	575.03	821.5	469.152	593.166	467.456	971.338
ENSSSCG00000006738	CD58	14.4509	17.2035	13.7576	12.3645	11.8334	11.7539	9.41073	9.17764	18.4684	19.2093	18.8322	28.8052	47.2915	70.5991	20.6841
ENSSSCG00000013111	CD6	6.89899	10.0342	0.125066	0.282441	156.715	136.325	120.531	82.1309	224.6	179.808	15.5912	12.8751	0.00154798	0.0907737	13.1539
ENSSSCG00000000361	CD63	96.6585	353.834	56.1045	104.797	218.621	293.81	267.896	348.078	252.344	304.674	390.888	306.513	904.839	904.839	306.151
ENSSSCG00000017956	CD68	2.80943	6.81886	0.74227	2.30268	0.249745	0.58961	0.145102	0.277949	0.148117	0.35072	0.381343	0.659042	47.2055	51.5329	0.187285
ENSSSCG00000000653	CD69	46.0807	53.8735	185.458	78.0733	203.443	498.806	191.407	547.021	99.2796	296.783	128.816	279.797	0.36359	1.07243	6.8143
ENSSSCG00000033684	CD79A	179.79	146.255	246.866	208.575	26.2678	46.8974	56.5483	64.7275	27.9781	39.8596	78.029	106.245	12.9102	15.2367	41.4313
ENSSSCG00000017283	CD79B	597.916	374.549	728.451	667.705	1.53681	3.71935	6.4399	10.9911	0.986065	1.37908	2.18675	1.56586	1.55171	2.12722	29.0262
ENSSSCG00000011899	CD80	22.1975	9.56216	20.218	18.1382	5.41935	4.45901	10.4346	7.94634	23.5011	29.2575	9.2345	11.9543	16.5203	24.71	22.8041
ENSSSCG00000039243	CD81	223.648	213.443	185.937	141.884	319.049	216.045	319.883	225.666	400.249	261.146	385.782	215.873	214.074	178.692	172.841
ENSSSCG00000029521	CD82	6.38503	14.876	5.782	13.4649	6.99575	7.11558	4.6971	8.58194	6.06892	5.39523	8.50318	6.95198	4.18774	3.33813	3.43123
ENSSSCG00000006381	CD84	13.0393	17.0807	14.3427	8.04531	40.7374	41.0366	25.9723	22.367	35.1906	33.1548	64.0398	85.8945	29.4132	30.2768	17.2106
ENSSSCG00000011877	CD86	23.7942	22.7501	23.424	32.8087	9.12478	5.62843	9.19919	8.61495	32.3104	28.809	3.42264	1.97983	89.2583	72.7201	5.9127
ENSSSCG00000008217	CD8A	2.29933	2.87292	1.25653	3.33087	6.34488	7.27299	705.441	470.274	95.968	104.624	17.8581	7.94845	0.832172	0.726182	366.616
ENSSSCG00000008213	CD8B	6.68506	1.3613	0.0329781	0.0785112	5.99169	3.90709	424.91	267.612	39.2252	7.06613	4.96243	1.69635	26.7691	8.43046	221.227
ENSSSCG00000008213	CD8B	6.68506	1.3613	0.0329781	0.0785112	5.99169	3.90709	424.91	267.612	39.2252	7.06613	4.96243	1.69635	26.7691	8.43046	221.227
ENSSSCG00000022230	CD9	130.456	121.944	30.1385	41.7507	31.3494	32.3191	7.46027	9.06231	103.896	103.577	13.591	22.5328	580.659	567.799	2.31344
ENSSSCG00000007116	CD93	6.87199	2.89558	0.126396	0.0393344	0.981801	1.82201	1.09145	2.12382	0.956292	0.480354	0.582668	1.53504	8.34165	8.17091	3.63163
ENSSSCG00000023993	CD96	3.46035	8.24734	0.1525	0.462446	2.25604	2.61768	51.157	46.6191	2.45394	2.59778	25.5022	16.933	0.0839941	0.0914813	60.1909
ENSSSCG00000012744	CD99L2	0.609352	1.81507	0.774294	0.491608	1.26701	1.01048	1.13289	0.903771	1.419	1.97661	2.36444	2.51129	0.607125	0.767748	0.866268
ENSSSCG00000021259	CDA	0.740879	5.6517	0.110581	2.22112	0.0720775	0.150555	0.00132549	0.00422539	0.00170735	1.71855	0.0508842	0.00498369	54.8401	43.0735	0.00079626
ENSSSCG00000031598	CDADC1	3.42309	3.20495	3.70408	3.51653	7.79103	2.984	3.67578	1.95267	9.34068	4.41616	5.99399	3.93062	14.9757	16.1971	3.96595
ENSSSCG00000004719	CDAN1	8.45342	4.60786	10.1688	5.06142	10.7083	15.4242	7.25227	4.73258	8.5697	12.3865	8.01915	13.6831	2.30753	3.73587	8.52955
ENSSSCG00000011112	CDC123	55.0528	49.972	42.6792	55.7562	103.093	100.632	103.217	103.217	132.463	143.062	65.4787	49.4427	41.3101	38.7941	67.5874
ENSSSCG00000006864	CDC14A	27.2999	13.3391	41.7124	23.0263	62.5668	69.0326	29.8152	24.4222	86.6734	118.477	37.7633	58.9405	11.3633	15.2555	36.6052
ENSSSCG00000020899	CDC16	40.1976	17.884	35.9497	32.2536	33.6175	35.3586	27.5523	21.9461	25.0681	34.851	34.4198	50.565	17.835	21.1712	31.1582
ENSSSCG00000003949	CDC20	11.2424	8.66606	2.98777	7.65135	2.0818	1.0427	3.19946	2.14999	7.86278	3.63469	0.524253	0.391424	0.0384194	0.284721	38.5596
ENSSSCG00000014325	CDC23	6.81886	6.09422	5.3261	8.97346	5.59613	5.56242	5.90003	4.31198	6.12551	6.34456	6.37102	5.48722	3.45651	3.26357	10.6154
ENSSSCG00000021494	CDC25A	7.74908	5.42145	4.19805	5.22708	4.50581	5.85916	4.89717	4.52287	5.64607	6.94299	4.89098	5.63394	3.37605	4.3882	10.3015
ENSSSCG00000007151	CDC25B	54.721	66.6805	62.8895	41.1941	292.644	246.007	230.424	144.546	374.146	258.427	289.746	246.122	10.4599	14.699	154.469
ENSSSCG00000014329	CDC25C	3.78447	3.14712	1.22227	3.5253	1.41631	0.70383	0.944152	0.67978	2.90319	1.65758	0.554217	0.529922	0.0871592	0.0705443	8.68876
ENSSSCG00000033177	CDC26	5.76635	14.7326	5.2969	13.3286	7.29515	7.08741	8.03269	10.8483	5.12553	5.53564	5.35947	4.14022	13.1924	13.5267	6.0999
ENSSSCG00000017308	CDC27	33.6783	17.2424	24.5489	22.4485	29.6222	27.4009	19.6257	19.9644	35.3809	34.0498	27.1692	32.7917	21.3241	22.5166	56.062
ENSSSCG00000039640	CDC34	26.1188	31.2309	20.407	25.7283	29.8432	24.9537	49.2204	43.0309	33.1629	26.7831	27.2701	20.5804	29.6667	24.7322	59.8784
ENSSSCG00000013647	CDC37	77.9104	77.2566	55.7119	57.3006	73.0987	61.5897	82.605	73.8543	83.5296	58.5083	78.5024	62.2751	97.4539	84.394	103.471
ENSSSCG00000005219	CDC37L1	8.7834	9.08902	9.46119	10.6697	12.1502	10.1401	8.25855	8.40785	12.9824	12.9097	10.4287	14.4125	7.60384	7.58816	11.0336
ENSSSCG00000004403	CDC40	20.2789	22.5361	22.7901	26.6223	19.2246	18.7889	16.6984	17.8856	17.3171	19.6454	21.5073	21.9639	24.567	24.5408	18.2009
ENSSSCG00000003520	CDC42	404.32	717.456	415.678	868.671	721.224	589.868	547.021	726.613	813.847	789.497	866.814	616.906	652.642	521.403	799.428
ENSSSCG00000010862	CDC42BPA	0.491332	0.20075	0.0980498	0.00916371	0.711231	0.467056	0.237229	0.189688	0.258972	0.346754	1.37492	1.79713	1.46404	2.37739	10.4497
ENSSSCG00000002523	CDC42BPB	0.096934	0.164438	0.134895	0.0539418	0.254946	0.102256	0.0308923	0.025389	0.515993	0.346124	0.478416	1.25078	0.94639	1.36555	0.0288267
ENSSSCG00000013018	CDC42BPG	0.643253	0.727434	1.08853	0.843573	1.41246	2.9801	1.59017	1.71706	0.923257	1.66017	2.07451	5.25474	0.0959288	0.0335532	1.75026
ENSSSCG00000021359	CDC42EP3	13.2473	29.3627	5.71373	14.5833	33.8608	26.8112	41.5342	39.9032	63.7005	68.4371	30.4505	20.7247	0.241262	0.0769554	127.967
ENSSSCG00000017245	CDC42EP4	1.20001	1.03314	0.00331914	0.13212	0.121728	0.032938	0.0147681	0.00422539	0.024284	0.0334084	0.0011845	0.00498369	17.6739	14.4785	0.176536
ENSSSCG00000031881	CDC42SE1	161.695	219.335	177.003	190.244	196.197	178.416	198.452	191.005	258.427	257.416	352.146	308.23	229.265	209.919	235.5
ENSSSCG00000036686	CDC42SE2	82.5834	88.4908	104.318	116.237	148.533	123.734	128.487	143.015	137.79	108.943	104.803	73.563	84.6974	78.209	146.192
ENSSSCG00000010122	CDC45	11.5524	4.59253	6.79993	7.90605	3.83003	5.78415	3.01052	2.23539	3.80191	6.93066	3.33663	3.46908	0.915499	1.67009	13.0362
ENSSSCG00000001708	CDC5L	27.6735	20.9961	32.2707	18.9118	38.5229	35.9053	27.6892	23.2246	45.9722	45.3798	38.4579	40.7867	32.2371	32.8721	34.1274
ENSSSCG00000017471	CDC6	7.51647	7.64468	3.46103	6.51061	1.74508	1.34923	2.35022	1.11144	3.88303	3.35746	1.41254	0.844879	0.489237	0.614978	9.85344
ENSSSCG00000027251	CDC7	13.2141	4.08179	7.62998	5.95825	6.24933	5.0609	6.06164	4.04679	8.39147	8.20744	4.74166	5.7409	2.95021	2.82959	19.1372
ENSSSCG00000010801	CDC73	15.3768	14.8514	14.8869	13.8743	20.7248	17.9757	15.7695	14.6983	21.9103	16.6822	19.7205	18.8067	19.3654	14.7915	23.9529
ENSSSCG00000009653	CDCA2	4.42132	2.1604	1.86157	3.38193	1.01823	1.25737	0.787876	0.477171	3.69279	2.23786	0.737785	0.523799	0.214309	0.339276	12.4872
ENSSSCG00000000683	CDCA3	18.3119	11.226	6.76033	17.0811	2.11724	2.25042	5.94094	3.75913	13.5392	7.88773	1.69098	2.08017	0.193518	0.653762	59.9391
ENSSSCG00000002559	CDCA4	18.0699	25.3555	14.4774	16.9891	9.7704	17.0866	17.7934	28.0742	17.7605	12.9308	16.6574	15.0982	11.4188	6.1896	21.8744
ENSSSCG00000013008	CDCA5	8.72541	4.5385	2.80888	5.13558	1.20234	0.986971	1.61863	1.05167	3.39916	3.18671	1.28155	0.674318	0.157392	0.123579	14.5354
ENSSSCG00000015961	CDCA7	64.5523	17.9094	14.6344	33.7171	4.84562	3.16759	8.29167	6.09893	14.2458	10.9863	5.55409	1.35887	1.84314	0.736841	58.5843
ENSSSCG00000015380	CDCA7L	80.4033	33.0317	118.296	68.9444	121.504	115	38.0427	27.0698	86.5239	84.1032	54.2543	49.0864	20.1777	18.2515	55.6566
ENSSSCG00000032909	CDCA8	12.7409	8.49644	5.00472	12.3809	1.91274	1.57085	3.06823	2.01547	8.42517	6.09508	0.919041	0.405324	0.0345962	0.127953	40.7521
ENSSSCG00000011298	CDCP1	0.293506	0.242206	0.303718	0.0503667	3.07305	2.32935	1.42014	1.5574	2.5627	2.81786	0.237817	0.190473	0.266443	0.110165	0.22873
ENSSSCG00000025652	CDH1	0.379064	0.310634	0.0539418	0.198925	8.49488	5.54762	13.2761	10.1641	2.50738	1.63334	0.258122	0.0989235	0.0524792	0.037312	8.43523
ENSSSCG00000002684	CDH13	0.0271327	0.209265	0.00331914	0.395116	12.6112	11.7485	0.216764	0.443513	1.05516	1.67033	0.057275	0.0320069	0.00154798	0.0196083	0.00774461
ENSSSCG00000003722	CDH2	1.6095	1.03117	1.23994	1.28197	0.00387933	0.0072172	0.00132549	0.071419	0.0365028	0.0175393	0.0158912	0.0263826	4.08436	2.76632	1.6415
ENSSSCG00000010278	CDH23	0.0367866	0.0328911	0.0767286	0.0589276	0.852874	0.788136	0.0757035	0.0773584	1.8133	1.7579	0.111559	0.284591	2.02082	4.9673	0.0226653
ENSSSCG00000002037	CDH24	5.02117	8.5012	7.28218	3.04533	9.11495	14.5838	10.3258	9.52113	8.55407	11.7686	37.5122	80.2537	0.129439	0.167423	9.82536
ENSSSCG00000011391	CDHR4	2.95062	0.586042	4.62997	1.45951	2.40192	2.3095	1.84201	1.36831	1.46698	3.31826	2.41842	2.75001	0.903618	1.40822	2.19663
ENSSSCG00000007941	CDIP1	50.7773	39.8919	24.847	23.6448	21.3915	18.6105	29.8905	26.8206	13.5134	8.34143	21.6541	17.4927	29.2267	19.9076	41.9634
ENSSSCG00000027629	CDIPT	49.972	94.6163	36.2411	63.1429	30.9452	43.7603	43.0085	57.2677	43.1917	56.0912	48.1884	57.0349	125.45	87.4741	41.8216
ENSSSCG00000010214	CDK1	59.6882	41.8546	19.3907	78.6753	7.75835	10.2257	13.0983	13.6076	32.8396	31.1339	3.36468	1.73142	0.694833	0.0959288	113.332
ENSSSCG00000025401	CDK10	25.3986	14.964	26.5634	19.0538	21.5749	22.5394	25.0987	19.5532	14.8644	18.0174	22.4577	27.2701	17.6943	20.8496	14.4976
ENSSSCG00000017504	CDK12	10.8097	5.26715	17.0185	7.95799	15.1674	16.0249	10.84	8.01642	16.2528	16.8343	15.0793	20.3664	9.94837	12.0485	15.5174
ENSSSCG00000016769	CDK13	31.9699	16.6498	41.7861	19.3746	41.3844	43.329	27.9614	24.3905	40.7092	42.065	42.9885	53.0179	26.1853	30.7777	33.6947
ENSSSCG00000015307	CDK14	0.853497	3.1696	1.65208	0.933091	4.97409	5.47264	0.126447	0.0883101	0.416767	0.452942	15.9392	15.3417	12.4516	12.4425	2.28296
ENSSSCG00000012269	CDK16	20.0513	9.93282	18.3036	10.7238	14.8506	19.1615	17.1096	16.4066	15.2295	16.161	21.1118	26.7017	12.1249	15.422	17.7704
ENSSSCG00000028182	CDK17	17.9719	15.0227	37.4045	24.9022	38.2786	33.8608	17.7854	17.2115	32.2293	37.227	26.615	35.8159	9.14323	10.2704	34.7927
ENSSSCG00000015290	CDK18	1.67149	0.759142	0.930761	0.544682	3.95341	3.29448	3.49228	4.42583	2.19708	0.885165	1.25322	0.921244	3.34642	3.23483	1.81143
ENSSSCG00000037424	CDK19	19.5701	10.8348	18.9244	15.6178	12.9214	11.4073	9.183	8.27859	16.1103	11.7155	13.8448	12.2438	18.9543	18.7843	21.2971
ENSSSCG00000037597	CDK2	61.4893	52.1776	42.4782	50.4764	99.8583	62.6937	73.4993	47.4232	104.855	58.2893	88.5231	47.2078	74.1284	48.5322	90.2421
ENSSSCG00000009775	CDK2AP1	81.215	42.5038	53.8958	73.5541	62.2551	52.4797	56.7458	42.0274	65.9427	62.8499	37.105	24.9562	55.1805	36.5552	84.7881
ENSSSCG00000012902	CDK2AP2	179.135	179.318	155.891	170.098	125.725	120.888	188.296	144.089	209.762	175.332	203.986	169.373	94.6954	83.7344	186.623
ENSSSCG00000017194	CDK3	5.22146	14.4757	5.35011	9.49255	6.51013	7.83824	4.45347	6.32734	5.68865	7.35226	3.66673	3.75727	22.7292	21.0694	4.74781
ENSSSCG00000025092	CDK4	30.9513	49.2824	20.8202	42.5457	22.6814	22.362	24.8618	35.8226	24.1432	23.4194	24.7355	20.9584	18.3131	18.9146	33.1985
ENSSSCG00000028117	CDK5RAP2	4.65656	1.40327	5.90236	2.51989	6.48891	5.87365	4.06195	1.90266	8.09585	6.26095	7.53647	9.1352	1.36278	1.08248	11.5235
ENSSSCG00000017524	CDK5RAP3	18.7896	14.1458	14.7056	13.6691	16.0804	16.5012	19.3998	15.3483	16.4896	15.8311	17.0054	16.8689	21.1055	19.8014	16.1695
ENSSSCG00000040183	CDK6	5.1813	1.4426	2.99045	1.16933	1.95918	2.4199	0.394412	0.438995	2.45746	4.60254	3.14929	6.96387	1.12714	1.74296	3.58603
ENSSSCG00000016961	CDK7	16.4443	15.5838	22.1056	18.2665	17.7052	18.6661	13.9265	18.4826	17.1749	20.2166	16.5927	23.9445	16.6632	17.9156	14.7485
ENSSSCG00000009298	CDK8	14.2536	8.65795	11.4159	12.0683	14.0212	15.736	16.4159	13.8582	15.0992	19.1606	14.6069	17.5105	16.344	17.2302	26.2569
ENSSSCG00000005621	CDK9	101.966	69.8742	90.9731	58.0263	128.617	133.538	104.945	71.5735	152.627	147.085	164.57	203.019	101.436	119.393	99.4022
ENSSSCG00000001080	CDKAL1	8.57087	15.6835	10.5032	16.3044	15.2242	17.5662	13.3785	18.6503	12.7662	14.5768	15.0612	17.6433	9.88147	9.15395	12.1176
ENSSSCG00000008970	CDKL2	0.305027	0.462011	0.00331914	0.00916371	0.448327	0.214535	0.354702	0.102001	0.538486	0.2557	0.209477	0.134041	0.101176	0.101487	1.63709
ENSSSCG00000012156	CDKL5	0.274497	0.294295	1.88237	0.513169	1.51194	2.28661	0.100778	0.362387	0.972433	1.62888	0.706544	2.59733	0.0919233	0.120908	0.878062
ENSSSCG00000037144	CDKN1B	31.3042	33.3872	34.4395	43.9991	140.412	117.424	88.281	84.9305	96.8103	86.9657	55.5397	37.2254	42.4416	28.6069	73.923
ENSSSCG00000040461	CDKN1C	0.352466	1.68632	1.09623	0.207082	2.08369	1.04591	1.91338	0.496491	0.536428	1.37583	7.81235	4.62224	1.73074	1.88003	0.864261
ENSSSCG00000015779	CDKN2AIP	10.392	16.0071	12.7626	15.0133	16.0932	14.2283	14.0644	15.3825	13.9066	17.6459	17.52	21.1931	12.6464	14.5347	20.162
ENSSSCG00000037127	CDKN2AIPNL	38.781	64.3144	31.6527	66.9418	40.9873	49.158	43.5568	63.8925	34.2234	44.5914	34.9184	30.3277	30.7936	28.9317	41.8978
ENSSSCG00000003876	CDKN2C	20.4899	22.5993	11.9581	28.3102	6.18202	5.71564	8.58519	7.48813	21.7564	16.1959	5.77056	3.52114	2.13705	1.85687	71.6289
ENSSSCG00000013643	CDKN2D	30.487	72.8809	26.8741	49.6205	30.1914	49.457	34.7649	59.4023	38.5805	48.3347	58.3149	59.1692	32.9201	48.2372	63.7417
ENSSSCG00000005047	CDKN3	24.9524	25.5738	11.8098	25.0772	5.38791	5.80522	4.87861	9.35339	7.82208	8.01491	3.49554	2.79608	0.695824	1.16513	30.7811
ENSSSCG00000022504	CDON	0.445741	0.386282	0.263887	0.535483	0.342616	0.273693	0.217638	0.307106	0.12739	0.0530937	0.207964	0.183805	1.04233	0.812533	0.335399
ENSSSCG00000000005	CDPF1	13.0556	28.9642	11.895	18.4262	20.567	25.8587	25.6116	36.2	21.0652	19.2	20.1117	20.6903	13.0874	15.2715	22.565
ENSSSCG00000032340	CDR2	3.47527	3.43106	1.50285	1.40792	5.68417	5.58768	4.17372	3.84904	14.4463	12.7914	4.20177	2.9995	3.41432	3.96404	12.7706
ENSSSCG00000017218	CDR2L	3.31888	1.44382	1.71968	1.31423	2.50385	1.05061	2.88689	1.77894	4.68033	5.15597	2.62018	1.27249	1.60866	0.238067	11.3027
ENSSSCG00000009231	CDS1	0.0289787	0.0955371	0.00331914	0.00916371	0.0710628	0.758069	0.0166393	0.0935845	0.0926824	0.476271	0.0621955	1.20368	5.41687	4.28983	0.00079626
ENSSSCG00000030123	CDS2	18.0278	18.2426	23.0846	18.2306	39.1915	36.0785	27.5354	21.9205	36.6711	32.5789	43.8347	42.5378	19.4517	19.3042	23.0729
ENSSSCG00000027294	CDV3	65.4461	34.0944	40.0533	34.5218	56.5623	42.2263	66.339	40.3816	68.6025	52.4192	69.8551	60.1052	118.289	89.4851	66.9633
ENSSSCG00000000999	CDYL	6.59629	6.63054	8.55396	5.27412	7.99105	7.00088	9.19466	7.20917	8.03469	8.30071	9.34939	9.86982	12.5014	13.6549	6.46567
ENSSSCG00000038128	CDYL2	4.27182	3.1447	5.25932	3.85454	6.60586	6.28737	4.03154	2.80251	7.56187	6.83696	3.29625	3.88378	1.64686	1.79506	7.86382
ENSSSCG00000002866	CEBPA	1.61353	1.89604	0.190102	0.00916371	0.298351	0.375252	0.311293	0.263119	1.38426	0.983422	0.0011845	0.457823	106.588	101.111	0.00079626
ENSSSCG00000034207	CEBPB	12.1706	19.6882	52.8795	17.5926	47.894	209.852	34.5989	38.5457	29.2841	115.175	25.8681	232.577	467.456	527.297	16.8526
ENSSSCG00000032367	CEBPD	2.17229	9.788	3.85972	3.6247	24.471	33.825	36.4173	31.0861	21.7951	24.9428	8.91927	25.1466	623.243	421.95	6.93752
ENSSSCG00000002867	CEBPG	17.1358	17.4864	10.3098	20.5003	16.1218	14.5653	15.3356	15.2577	17.4439	17.7168	18.4583	14.735	14.6661	12.1485	13.6231
ENSSSCG00000008493	CEBPZ	27.2847	16.4541	28.6202	18.8023	36.105	25.639	30.2365	18.9117	28.6192	23.2079	32.3997	24.7723	28.2121	28.0887	32.0703
ENSSSCG00000000766	CECR2	0.499213	0.621093	4.57141	2.11924	0.22003	0.146209	0.0362752	0.0388752	0.253565	0.329094	0.434925	0.264305	1.11712	1.19039	0.156866
ENSSSCG00000028671	CEL	0.223976	1.79707	0.358336	0.316133	0.869669	1.51728	1.1272	1.72226	0.292191	0.584459	2.12465	2.86162	0.00154798	0.0023305	0.781326
ENSSSCG00000013233	CELF1	45.8059	16.9911	36.18	20.6351	37.7753	36.0271	29.3697	16.6472	36.0176	35.7539	40.9183	49.8135	18.7316	14.8233	37.0953
ENSSSCG00000031361	CELSR1	0.0136396	0.0616129	0.265375	0.136456	1.2147	1.24764	0.461005	0.225752	0.846238	1.07175	0.185529	0.309981	0.0433897	0.0289925	0.0122261
ENSSSCG00000034360	CELSR2	0.378489	0.253663	0.206007	0.0742287	1.52186	1.90274	0.449341	0.633672	0.906214	0.670805	0.922697	1.109	0.933691	1.44143	0.916502
ENSSSCG00000024257	CEMIP2	9.16346	5.78105	46.4719	21.4201	17.0866	16.5645	12.4278	8.86626	30.1338	27.7773	13.6441	13.649	21.604	26.8195	37.161
ENSSSCG00000038543	CENPA	24.9794	15.5102	8.02834	21.3765	4.97134	2.87444	7.54506	3.95952	14.8184	10.6118	1.24445	0.763052	0.0287153	0.0945256	65.4708
ENSSSCG00000008921	CENPC	18.0511	8.95562	24.1198	13.9445	23.761	20.762	14.9126	12.0561	23.613	26.8259	28.5217	35.1814	19.6575	20.3779	36.0744
ENSSSCG00000023296	CENPE	7.89158	1.46964	3.62626	5.19518	2.18461	1.12722	1.23156	0.909892	4.34685	4.90072	0.75786	0.358311	0.172026	0.151783	17.4021
ENSSSCG00000015581	CENPF	9.58931	2.01951	3.1227	4.54101	2.19491	1.28292	1.3032	0.497191	6.78947	4.71527	1.28956	0.841647	0.242258	0.283509	21.9196
ENSSSCG00000027147	CENPH	34.553	42.2464	28.3622	43.8726	30.2525	26.3681	26.3668	36.0258	31.2664	55.6585	49.4912	47.3085	12.6	12.4273	29.5368
ENSSSCG00000012491	CENPI	5.3716	7.9423	3.87643	12.1383	2.86068	3.58832	2.89073	4.31392	3.81237	4.11613	3.28927	3.52584	1.28373	0.825245	13.2431
ENSSSCG00000029393	CENPJ	3.68515	1.0819	2.77603	2.18449	4.13999	3.27035	2.89247	1.35432	5.23387	4.66469	4.215	3.33663	3.21261	5.51017	6.2182
ENSSSCG00000016946	CENPK	12.9101	14.1164	13.2996	18.3036	6.26698	6.07767	5.46424	9.29991	4.88838	10.3855	4.8597	4.46764	2.2323	3.43274	10.6834
ENSSSCG00000015496	CENPL	1.904	4.79984	0.629852	5.59462	0.793436	0.965824	1.36831	1.7151	1.78438	1.61262	0.516634	0.483081	0.183392	0.126343	7.81436
ENSSSCG00000035991	CENPM	19.4879	21.4566	12.6641	25.1347	17.3419	12.909	11.7375	12.8662	16.7361	10.5647	15.037	8.02557	2.00635	0.858089	28.5225
ENSSSCG00000039216	CENPN	11.6762	10.933	6.41224	20.0638	2.2838	3.03145	4.14724	4.58084	6.85834	6.90123	1.47364	0.804553	0.603009	0.649385	25.3528
ENSSSCG00000008070	CENPP	4.8064	5.52611	7.49912	8.33956	3.1449	5.14129	3.06489	2.94709	4.48154	8.97498	5.02038	9.83409	1.13338	0.896403	7.48633
ENSSSCG00000001731	CENPQ	10.0789	9.18157	12.4436	12.243	7.76574	10.0922	7.98759	8.81607	8.62857	12.2608	11.4176	12.0063	5.01738	5.44187	18.127
ENSSSCG00000003403	CENPS	16.4678	23.0252	10.1222	24.3081	3.66746	3.92986	6.33731	6.53311	5.59961	9.54734	4.29242	3.47873	1.86912	2.04265	18.8451
ENSSSCG00000002768	CENPT	8.04231	2.66333	2.15614	5.9223	1.00612	0.655586	1.10047	0.557689	2.61613	2.06533	0.797129	0.345606	0.0260888	0.0263759	10.8247
ENSSSCG00000015785	CENPU	5.94963	4.49779	1.9593	6.55543	2.64361	2.09535	2.53808	1.58394	2.91314	4.27002	1.91809	1.52458	0.396346	0.634088	8.9752
ENSSSCG00000003362	CEP104	12.3703	5.1975	25.8277	7.84639	14.7092	22.9482	13.3373	8.11159	16.5342	25.9084	13.887	23.9974	9.93055	19.4608	11.0715
ENSSSCG00000023992	CEP112	0.0811781	0.290983	0.669136	0.318032	0.0253589	0.00100702	0.00132549	0.00422539	0.0163073	0.00247515	0.466196	0.699717	2.22809	2.2304	0.0115639
ENSSSCG00000014239	CEP120	19.5748	10.9954	25.0117	13.0874	25.5624	27.1382	16.4202	13.3703	26.0578	30.6563	25.2879	32.8677	19.5666	21.7193	27.3355
ENSSSCG00000002410	CEP128	1.23422	1.68838	2.17411	1.10047	2.93728	2.53707	1.33477	1.55241	2.42647	2.51786	2.09735	2.8385	0.566126	0.786162	3.99052
ENSSSCG00000017143	CEP131	1.78631	0.717379	2.25433	0.652921	2.9482	4.38235	3.24585	2.22485	1.63877	1.69603	3.21109	4.44513	0.837383	1.00706	1.83852
ENSSSCG00000022283	CEP135	8.68794	2.19055	11.0262	5.14838	16.0648	22.3271	7.82244	5.89083	6.38781	13.3362	8.79562	16.9286	3.92396	5.55096	7.49939
ENSSSCG00000004657	CEP152	2.44666	0.622479	2.19061	1.81936	1.7994	1.69845	1.55651	1.42249	2.29223	2.68202	1.56073	2.38978	0.345625	0.706709	2.1389
ENSSSCG00000004289	CEP162	2.46962	1.02128	3.80684	2.13765	3.07488	4.16886	1.6354	1.23741	2.21129	3.77272	3.1102	4.82795	1.7407	2.85338	2.73156
ENSSSCG00000015080	CEP164	2.72334	2.20564	2.96755	1.95353	7.55084	6.57278	2.70835	2.38231	14.8923	14.3708	4.45222	3.81436	4.21161	4.61304	3.67465
ENSSSCG00000030502	CEP170	21.7001	5.11525	28.4711	9.70006	8.41671	9.60494	8.35173	5.17602	9.03919	11.3432	15.2974	22.3673	15.7123	25.06	23.5223
ENSSSCG00000002558	CEP170B	0.394012	0.627446	0.788401	0.253802	1.09494	1.33848	0.880093	0.869241	1.21945	1.79474	1.26954	2.0107	0.233644	0.240855	1.68742
ENSSSCG00000021918	CEP19	2.04938	1.76921	1.83106	2.93125	5.46157	4.26963	3.50336	3.53622	3.20704	3.53016	4.05241	4.70681	3.75993	2.77524	3.17101
ENSSSCG00000003673	CEP192	77.649	83.9951	80.9763	90.5069	88.8846	93.2477	80.0766	91.7737	79.9207	93.9459	94.7273	110.655	45.1012	40.7615	78.3982
ENSSSCG00000021138	CEP250	5.69732	2.3562	5.20899	3.23571	7.60172	7.02116	5.69246	2.92533	7.90727	7.34184	7.95674	9.06722	3.65777	3.86829	6.74719
ENSSSCG00000000926	CEP290	2.33517	0.670524	5.81913	1.94186	3.72697	4.86378	2.16029	0.976767	2.69282	5.91224	3.60763	5.58355	1.65347	2.54341	2.74333
ENSSSCG00000014946	CEP295	13.3161	1.9272	22.5692	7.77943	15.787	18.701	8.11957	5.94094	10.3514	16.7715	15.3628	23.1652	4.41977	8.29741	9.76214
ENSSSCG00000016556	CEP41	3.33897	4.1697	3.17732	5.77109	3.76463	2.63921	3.14764	3.45186	4.60736	4.17973	3.7513	3.40156	3.6728	3.15384	3.49215
ENSSSCG00000032475	CEP44	14.6886	10.5863	11.0415	14.6019	10.8527	15.684	6.98004	5.5983	12.2402	25.9038	26.7285	36.7417	7.54811	10.296	12.6175
ENSSSCG00000010477	CEP55	4.35235	2.18931	2.69493	3.38016	2.18189	1.66801	2.25545	1.84995	4.06212	3.95665	1.48847	2.04378	0.679588	0.216214	9.9451
ENSSSCG00000004391	CEP57L1	3.46187	3.02156	2.49447	4.02097	1.24257	1.60694	1.40618	1.53845	1.30594	0.873278	1.34218	2.76982	0.292889	0.912194	6.25787
ENSSSCG00000011645	CEP63	17.0234	4.69132	20.3234	11.251	19.3736	20.4249	15.235	8.08547	13.3421	23.5461	20.8334	25.9137	9.18357	15.9972	13.2209
ENSSSCG00000008360	CEP68	27.664	10.4408	31.1772	13.4572	40.4742	48.9708	24.2914	16.1689	31.8221	45.7564	42.0982	60.92	9.66975	9.25253	27.2745
ENSSSCG00000031800	CEP72	3.25662	1.09341	1.19482	2.39916	0.872343	0.785526	0.975502	0.519947	1.75612	1.84049	0.640359	0.28933	0.0550109	0.0023305	4.92113
ENSSSCG00000027007	CEP76	6.47832	4.23549	7.11898	7.04098	6.05863	7.63526	4.46037	5.08859	8.37654	11.4832	7.09044	10.3226	4.0938	7.02838	7.18627
ENSSSCG00000005286	CEP78	11.6193	3.13169	7.52397	7.57072	7.86019	8.27657	7.06869	4.59788	8.35833	11.2466	8.00842	8.99256	3.11466	2.5457	28.7081
ENSSSCG00000024563	CEP83	5.87156	1.93361	8.29708	4.12881	4.62355	5.73754	3.66731	2.82258	3.8678	7.78728	4.15071	8.16744	3.8031	4.92529	6.49514
ENSSSCG00000026731	CEP85	14.798	5.65889	11.9645	8.83681	6.06782	6.80183	3.71331	2.78521	6.70551	8.84703	7.22083	10.4683	5.61648	4.26034	10.136
ENSSSCG00000004249	CEP85L	1.48061	1.88122	5.05772	2.00072	7.3168	10.319	2.52331	3.37729	4.32038	9.21597	3.39475	10.9762	2.36721	5.66798	3.79228
ENSSSCG00000025152	CEP89	2.1368	1.17021	3.24762	1.76163	3.13814	2.483	2.33869	1.3663	2.39181	2.65085	3.1276	3.55455	2.0328	1.69594	2.65188
ENSSSCG00000028925	CEP95	25.18	9.28614	36.1356	16.5735	20.2455	23.2892	17.5992	12.3756	17.0883	26.5418	24.7589	28.3201	25.9997	27.2309	15.78
ENSSSCG00000011949	CEP97	2.29694	1.46585	2.67322	2.63064	3.55965	2.86068	2.33109	1.50454	2.79263	3.33317	3.9152	4.75099	2.37084	2.18231	4.20609
ENSSSCG00000029918	CEPT1	34.9802	43.673	40.2879	45.5714	37.2428	43.2385	30.8802	43.1163	41.4544	45.952	53.0041	64.3245	36.3628	31.9106	22.9176
ENSSSCG00000005650	CERCAM	1.4155	2.66978	0.214531	0.794917	0.00387933	0.0522814	0.0488516	0.00422539	0.00170735	0.00247515	0.0156915	0.0361096	2.33601	0.708157	0.575809
ENSSSCG00000038763	CERK	23.4047	18.1242	29.2919	14.4691	78.1581	108.219	58.3368	41.1635	53.5733	55.8425	57.5092	83.7458	20.4407	20.8865	31.797
ENSSSCG00000006644	CERS2	76.5142	48.0688	64.161	45.9592	72.7302	57.8582	81.7837	49.945	129.272	108.253	133.226	109.576	157.012	143.918	129.689
ENSSSCG00000013595	CERS4	20.5746	20.6903	31.4422	17.6888	39.3399	34.1632	27.5419	23.6079	29.9696	21.8845	31.9908	23.7683	1.41245	0.781099	13.5114
ENSSSCG00000024932	CERS5	18.2903	24.9668	16.6137	22.1149	22.4989	20.65	28.4747	23.5265	29.7515	28.2775	30.8983	24.3929	41.9757	41.9757	43.1093
ENSSSCG00000032715	CERS6	0.417354	0.689391	0.0549297	0.0415235	10.5494	8.06334	16.3387	15.5469	2.23786	1.21289	0.380483	0.213917	3.71387	2.47039	0.790436
ENSSSCG00000014081	CERT1	7.39673	9.38351	10.0755	6.08261	8.33976	7.60172	3.19273	2.63417	8.38059	9.16337	11.3981	15.2763	48.0353	62.9463	8.84492
ENSSSCG00000014151	CETN3	75.8626	83.7734	66.7958	99.3971	90.9377	106.575	76.8632	94.7113	58.9979	104.151	81.0231	92.0439	36.7336	57.9411	70.5878
ENSSSCG00000002805	CFAP20	7.38151	17.6093	7.29457	18.6363	16.486	19.2246	11.1286	18.993	18.0298	23.4146	11.9374	12.7345	5.00711	7.18551	12.4931
ENSSSCG00000040827	CFAP298	17.1317	23.0778	15.805	20.1234	16.3171	16.2402	17.9312	17.4306	16.4176	21.8037	20.263	15.2406	11.7314	13.1218	14.4485
ENSSSCG00000008400	CFAP36	3.59935	6.28291	4.63486	7.72688	4.51701	3.63304	4.90656	6.87738	3.39585	6.19204	4.22881	4.66178	3.94615	5.10921	7.01589
ENSSSCG00000021271	CFAP44	0.0149082	0.12799	0.0439639	0.00916371	1.69305	2.00785	0.79295	2.0896	0.187246	0.300889	0.0910889	0.343944	0.0454146	0.0023305	0.046267
ENSSSCG00000010768	CFAP46	0.00192957	0.0505157	0.00331914	0.00916371	2.18781	3.04536	0.681431	0.955924	0.26164	0.2289	0.0241129	0.00498369	0.00154798	0.0023305	0.00079626
ENSSSCG00000015791	CFAP97	9.30108	9.86404	13.1791	12.1534	13.4246	13.9304	6.47651	10.5629	12.0926	14.6554	7.56837	11.7424	14.7307	15.9186	10.8201
ENSSSCG00000013418	CFD	121.103	208.16	61.0814	139.471	0.59203	3.30549	0.496491	1.58113	0.492724	1.77988	0.824088	0.0580999	1176.41	873.27	14.1342
ENSSSCG00000033842	CFDP1	52.5757	53.3986	53.3182	46.8096	63.071	60.8746	66.1765	50.5777	58.4137	74.9104	68.5902	71.4998	69.9961	74.7824	75.8673
ENSSSCG00000001959	CFL2	2.39679	1.56795	5.17929	3.875	1.40748	1.46421	1.3507	1.70054	0.990471	1.77696	1.99167	4.74333	1.54242	3.45818	1.50238
ENSSSCG00000016101	CFLAR	29.5884	35.5023	33.4137	39.6598	50.3151	54.3693	42.6041	43.095	51.8183	68.965	47.5852	54.6238	38.9999	39.5464	41.0352
ENSSSCG00000012278	CFP	1.02949	2.3061	0.0561159	0.220184	0.221934	0.319214	0.372468	0.36921	0.437803	0.277666	0.127404	0.260812	72.0104	56.8621	0.964078
ENSSSCG00000025434	CGA	0.19351	2.52385	0.767068	1.27291	3.29448	5.15943	1.17001	3.14764	10.9606	23.4707	4.9123	4.14447	0.205517	0.799081	0.676025
ENSSSCG00000021383	CGAS	9.54864	11.6864	12.7751	18.1704	27.5654	23.0434	27.6219	22.5282	28.3534	26.6057	14.2001	16.4512	5.67007	9.18991	17.1061
ENSSSCG00000032182	CGGBP1	65.6374	50.1425	67.4436	53.9795	115	104.832	52.2409	57.8703	108.689	123.319	79.4922	117.655	75.7135	76.5682	100.293
ENSSSCG00000021451	CGRRF1	9.22246	16.4896	9.56339	18.677	12.1778	14.1802	11.2326	14.3276	14.013	15.3136	13.7947	14.4034	12.6811	11.6117	12.0548
ENSSSCG00000010449	CH25H	0.707032	0.170568	1.12278	0.468442	1.55922	1.77858	1.67473	0.607149	1.24333	1.89751	1.55254	1.56073	3.92605	8.21667	0.479994
ENSSSCG00000000067	CHADL	1.00501	7.79129	0.808946	3.99619	1.47846	3.64263	1.65931	6.54917	3.24309	5.1042	2.832	6.43943	1.50608	1.41574	2.08432
ENSSSCG00000013509	CHAF1A	13.6667	6.47832	6.0422	6.42069	8.50148	5.54067	5.54629	4.61809	11.2507	6.44354	6.37732	4.40073	2.09788	1.83291	18.8755
ENSSSCG00000012056	CHAF1B	9.03528	6.35388	2.79838	8.71537	2.96202	1.49974	3.18512	1.32123	5.42872	3.82565	1.86529	0.870716	0.220956	0.226836	11.8069
ENSSSCG00000010308	CHCHD1	27.5164	51.8133	27.8988	55.7877	32.3952	36.9158	33.2796	44.2528	28.8513	34.9903	31.6194	22.5102	33.4271	32.2944	33.2226
ENSSSCG00000016545	CHCHD3	43.7234	63.6853	39.1334	56.1368	47.4699	56.4175	62.7861	74.7843	53.3559	64.3503	47.7513	51.6604	45.1196	48.4976	104.959
ENSSSCG00000011604	CHCHD4	23.4156	41.1796	23.3342	45.8177	25.1331	27.5983	27.6095	36.4173	21.8364	27.563	24.8122	24.5163	31.3333	30.5372	21.558
ENSSSCG00000008094	CHCHD5	37.8533	79.0937	34.6705	88.9639	29.7035	31.9303	43.0814	55.5387	30.5536	28.7236	25.9467	21.4106	47.3508	51.0688	45.0079
ENSSSCG00000031557	CHCHD6	15.7545	26.8806	11.9705	27.3595	9.65148	12.8439	13.4511	22.2556	13.5899	14.6976	10.9179	10.2637	16.2332	17.54	18.8877
ENSSSCG00000014177	CHD1	15.1721	5.39025	25.6765	11.0701	21.083	24.6627	8.12552	7.8464	18.9958	27.8724	17.8136	31.0161	11.8432	20.9065	17.3473
ENSSSCG00000006701	CHD1L	15.8949	7.35229	13.3371	8.82933	12.4034	10.1228	10.4854	6.99387	14.1767	12.5102	17.1902	15.468	9.16363	10.9915	20.6798
ENSSSCG00000021363	CHD3	45.7206	22.9553	33.3671	14.0258	161.978	173.622	80.6768	50.3725	120.895	118.189	107.238	122.883	18.8026	18.9048	47.4854
ENSSSCG00000000697	CHD4	53.8528	27.1076	45.3501	25.671	66.1978	38.7403	51.6224	28.3728	74.6591	38.6785	77.9252	46.0506	59.0898	52.63	71.0708
ENSSSCG00000003366	CHD5	0.00313249	0.0598964	0.00331914	0.00916371	0.0311318	0.0387338	0.0167314	0.00422539	0.0143743	0.013856	0.0109787	0.0343955	0.175364	1.23415	0.0417271
ENSSSCG00000007360	CHD6	4.04161	2.39679	10.263	3.13789	8.50361	12.127	4.08075	3.56695	7.68534	11.2507	8.29388	14.0597	5.03794	8.54383	5.68468
ENSSSCG00000006231	CHD7	10.5618	3.75581	15.5143	5.17565	13.0186	14.362	5.79542	3.9817	6.42874	7.63628	12.9475	17.1045	0.999594	1.28004	5.2151
ENSSSCG00000002127	CHD8	19.7683	8.4051	26.5748	10.4094	26.7833	28.8334	18.5318	12.3847	26.2775	26.5744	29.8105	35.8673	12.7132	17.3767	21.7701
ENSSSCG00000033591	CHD9	6.5859	2.81899	9.42119	3.72906	3.8172	5.21836	1.56703	1.43352	3.71067	5.14549	6.09399	11.0658	7.74194	14.7186	6.79961
ENSSSCG00000011456	CHDH	0.220227	0.0352499	0.209881	0.0419361	0.543242	0.381571	0.1256	0.0843357	1.42799	1.21469	0.253227	0.582668	1.16136	0.691498	0.214318
ENSSSCG00000015215	CHEK1	9.66158	6.58278	4.27012	11.3219	2.42767	1.86891	2.32572	2.49585	3.25414	4.15716	2.77278	2.16917	1.15484	1.0809	10.0959
ENSSSCG00000034864	CHEK2	27.3424	9.27364	35.4429	24.5709	6.89138	5.63371	4.43006	2.20718	4.84328	8.19754	5.77917	4.33283	5.5929	7.10908	4.97673
ENSSSCG00000013860	CHERP	23.2444	17.2873	20.9287	15.7485	22.6132	18.6732	24.5906	15.9117	27.0975	19.5062	27.7969	19.5695	15.9186	12.0513	27.1301
ENSSSCG00000009732	CHFR	28.1357	20.7656	28.7047	19.1882	31.7931	29.1447	28.7193	21.2367	35.5169	32.3207	36.6161	35.3664	28.4288	29.2982	32.1531
ENSSSCG00000015476	CHI3L1	0.865265	1.0038	0.0524493	0.0396945	0.0258738	0.0925396	0.00132549	0.00422539	0.0188692	0.271309	0.026131	0.0592312	39.7174	39.8839	0.00079626
ENSSSCG00000006796	CHI3L2	0.19305	0.251275	0.688525	0.841159	0.683034	0.473335	0.3736	0.472849	0.276884	0.419382	0.283507	0.555248	8.05182	9.10444	0.0677991
ENSSSCG00000012416	CHIC1	3.4949	3.90127	4.21174	5.7521	6.296	4.17613	4.85097	5.97732	5.90486	4.67246	7.54241	4.97679	1.57761	0.818418	4.56902
ENSSSCG00000032645	CHIC2	12.2489	22.986	15.2124	23.5786	18.8243	24.5918	16.1053	28.3275	18.4503	29.8555	12.4535	18.4097	17.3593	23.7327	23.7485
ENSSSCG00000012837	CHID1	7.23928	15.1779	8.55636	11.5227	10.8222	11.7034	12.2442	16.1467	11.2926	10.3123	11.387	11.9278	21.934	18.108	10.0622
ENSSSCG00000015477	CHIT1	0	0.0117741	0.00331914	0.10993	0.00387933	0.0656678	0.00132549	0.00422539	0.00170735	0.00247515	0.0188055	0.00498369	41.9367	17.846	0.00079626
ENSSSCG00000012889	CHKA	5.42507	5.56096	4.74961	4.06564	4.90802	4.18053	4.45882	3.8304	4.82615	4.85109	4.91856	3.73945	12.1485	12.1757	4.18253
ENSSSCG00000012463	CHM	5.55635	10.8787	5.96153	12.6747	10.1261	8.26708	7.37453	12.1215	12.3865	9.94782	11.5263	6.93676	8.70168	7.25281	13.3644
ENSSSCG00000031212	CHML	2.92654	3.10085	3.87171	3.04905	5.72162	4.15512	4.98231	2.89671	6.10112	4.50919	6.70835	6.37165	2.5457	2.2772	6.1691
ENSSSCG00000023677	CHMP1A	52.7883	53.4363	49.3607	42.266	46.8765	47.3238	50.5482	50.7536	55.914	48.7286	56.1435	60.5229	43.0543	41.0039	49.1301
ENSSSCG00000029362	CHMP2A	86.0074	129.168	63.8063	84.7477	86.0145	91.1423	78.2381	83.4713	115.868	104.339	85.9611	94.0842	143.918	125.598	90.0435
ENSSSCG00000011997	CHMP2B	21.3295	30.8234	26.1463	35.062	23.3395	23.1397	16.9552	24.6294	19.7669	23.6061	27.8677	30.566	25.2135	26.1264	22.8727
ENSSSCG00000033432	CHMP4A	22.8843	38.7555	28.8989	31.2876	30.5685	40.6226	42.4007	42.5063	27.7089	37.5859	34.2753	36.1746	34.3952	31.8484	27.2651
ENSSSCG00000007272	CHMP4B	112.466	70.6545	81.6146	59.6171	93.0926	75.3888	96.231	75.5767	95.6664	98.9949	97.5167	72.7027	137.101	134.585	107.881
ENSSSCG00000010995	CHMP5	27.3483	43.5869	25.8913	39.8232	25.3092	32.8943	28.6153	36.558	26.6299	41.7382	31.9475	27.8407	70.5164	70.2976	22.5543
ENSSSCG00000017140	CHMP6	15.1666	25.628	18.446	21.3717	21.8996	18.2713	24.1277	26.693	21.404	22.6188	19.609	17.4087	18.0446	17.0482	15.6204
ENSSSCG00000033113	CHMP7	6.29074	9.58931	5.48791	6.28136	9.17544	7.56109	8.94215	7.92195	11.2712	10.1884	9.27205	7.38337	16.8511	16.3679	9.09692
ENSSSCG00000014934	CHORDC1	24.2511	20.4387	22.5045	23.9397	26.7889	25.6139	19.5929	19.7533	38.0617	35.5504	26.188	25.9892	23.5449	18.9659	31.1386
ENSSSCG00000004751	CHP1	49.8559	44.4225	34.7244	47.245	42.5063	28.3745	36.676	34.7266	62.2921	41.6616	59.7077	29.434	110.793	75.5229	35.0323
ENSSSCG00000021610	CHPF	3.74752	6.52555	0.894289	2.28188	4.37771	1.85226	4.83832	4.79868	4.03531	2.26934	1.94477	1.14655	0.443085	0.36099	9.53076
ENSSSCG00000016436	CHPF2	20.0557	17.4796	24.2154	15.8631	22.971	27.5298	22.8551	21.5945	27.2873	30.9728	27.3788	38.8169	15.447	15.6455	19.3084
ENSSSCG00000000864	CHPT1	0.683541	0.370906	0.0411601	0.119436	0.151704	0.775585	0.0231971	0.00422539	0.0264442	0.941871	0.663268	0.531915	340.656	304.157	0.043818
ENSSSCG00000005933	CHRAC1	95.0264	126.029	96.3597	128.156	136.964	156.966	137.908	161.923	115.384	169.416	93.1333	94.7885	60.3682	77.8682	129.024
ENSSSCG00000001752	CHRNA3	0.74791	0.159107	0.0576176	0.263887	0.11962	0.100402	0.0975102	0.200787	0.321111	0.226898	0.130676	0.216938	0.0308513	0.137596	4.7681
ENSSSCG00000013273	CHST1	0.884513	0.721242	0.0640913	0.0576176	0.00387933	0.00100702	0.0358052	0.00422539	0.00170735	0.00247515	0.053801	0.151485	0.00154798	0.0023305	0.00079626
ENSSSCG00000008175	CHST10	17.3571	17.6222	14.2751	14.9435	26.2314	24.3322	10.0309	13.8043	19.8143	15.7562	13.3284	13.5523	1.95199	2.09432	20.9893
ENSSSCG00000000837	CHST11	5.67113	9.49783	6.2219	4.68703	12.1412	12.0101	16.7092	11.9059	12.6508	12.1006	28.1265	26.1612	7.25738	8.58688	24.9481
ENSSSCG00000007567	CHST12	3.58851	3.8176	1.56428	2.30049	8.52135	6.89517	11.2887	8.20677	11.9734	6.50163	0.348525	0.12898	35.7015	27.2418	27.8892
ENSSSCG00000029482	CHST15	1.2797	1.91658	7.71625	5.47402	0.727245	1.02478	0.326385	0.537245	2.92326	1.4504	1.02461	1.37492	58.9071	59.4545	4.13124
ENSSSCG00000022031	CHST2	43.7495	28.1357	44.6452	59.9557	97.563	98.4429	52.5157	99.3636	24.9895	25.3325	5.53994	8.27186	5.06046	4.22591	47.7772
ENSSSCG00000023662	CHST3	0.00705554	0.0927043	0.00331914	0.00916371	1.87624	1.86956	0.6403	0.658549	1.60309	1.61482	0.0825264	0.0291389	2.38336	2.69054	0.00079626
ENSSSCG00000012265	CHST7	18.2426	29.1304	12.4314	22.4916	18.0654	14.8009	21.4402	19.1358	25.3857	21.5311	17.1596	9.38975	0.452514	0.289972	52.998
ENSSSCG00000004825	CHSY1	7.58972	4.83017	7.36203	7.19201	8.27657	5.80077	13.8537	7.70468	12.9982	9.45647	8.45839	5.16843	38.6216	47.7304	48.8587
ENSSSCG00000008010	CHTF18	2.51932	1.99197	1.84664	2.57678	2.33449	1.80355	2.26865	2.47935	3.04279	2.07522	1.53345	1.38858	1.38861	1.11978	4.57199
ENSSSCG00000022107	CHTOP	116.03	63.0051	114.611	67.9496	113.393	120.611	103.42	77.5147	97.1167	117.148	152.566	179.445	55.055	55.4317	123.409
ENSSSCG00000010548	CHUK	6.22113	7.29743	8.00127	8.09841	8.18874	8.98803	4.98005	6.44517	8.86027	11.2423	7.9271	10.1237	6.55807	8.44853	7.55351
ENSSSCG00000022147	CHURC1	42.9425	65.8501	31.7809	52.9128	70.6316	70.388	50.4879	80.0766	76.8196	83.5612	63.1185	65.8984	62.4837	54.3793	66.5265
ENSSSCG00000008130	CIAO1	39.2187	44.2302	31.7033	40.2538	45.2303	37.7595	40.999	39.5254	46.1057	39.6618	49.8135	42.9319	36.1931	31.1235	53.6947
ENSSSCG00000034124	CIAO2A	49.0855	79.9473	45.4968	73.6582	30.5944	37.9404	36.5208	49.2597	35.0885	40.6737	28.1898	25.5107	83.5819	110.96	43.6451
ENSSSCG00000033027	CIAO2B	22.8666	43.6286	24.5709	37.7716	28.2717	33.0855	25.8256	36.9148	25.1071	38.3195	23.8969	30.7729	21.9978	21.8606	20.9841
ENSSSCG00000008002	CIAO3	7.03927	4.66166	9.19851	6.24972	8.55623	10.4265	8.27648	6.41078	6.5754	7.43391	8.68754	11.5653	6.12984	7.43513	7.22636
ENSSSCG00000029519	CIAPIN1	12.3281	21.2893	11.2925	23.4574	13.5734	10.2739	11.5531	17.1028	13.7259	10.2479	11.9111	7.30013	13.2167	13.5174	12.9854
ENSSSCG00000038374	CIART	3.07602	3.3529	0.633011	0.278906	0.428813	0.45489	0.160126	0.171169	0.415976	0.695784	0.482605	0.815695	6.30921	3.46732	0.294184
ENSSSCG00000001858	CIB1	144.191	274.472	161.97	231.272	141.381	166.383	199.445	255.941	190.476	243.411	224.342	251.378	287.029	278.433	215.878
ENSSSCG00000003030	CIC	33.0317	24.99	32.1056	15.5879	34.8164	40.6942	27.1177	28.9425	42.9534	35.1906	47.6098	56.2767	23.8106	26.2364	33.3526
ENSSSCG00000001989	CIDEB	0.320526	1.00862	0.00331914	0.00916371	0.478059	0.189363	0.00132549	0.323033	1.26978	0.232972	0.0749259	0.00498369	41.1113	46.1086	0.135744
ENSSSCG00000007901	CIITA	66.6475	20.3404	108.262	38.0647	1.37933	1.68101	5.04231	5.95594	3.71849	4.07626	1.22074	1.94635	24.0375	46.1797	3.71715
ENSSSCG00000002628	CILK1	4.75513	5.83217	6.83446	3.41218	22.1725	22.3792	5.74922	9.13017	14.6147	15.204	11.333	15.282	8.43046	10.6991	20.6594
ENSSSCG00000002530	CINP	49.9568	77.9104	75.5227	94.3785	63.6349	75.6454	83.3167	103.762	52.1826	66.7997	56.3738	52.2958	68.5675	69.0843	41.9996
ENSSSCG00000033593	CIP2A	10.0342	3.09339	8.07935	10.3129	6.154	6.12681	3.42791	4.4135	5.63764	6.03338	4.87311	7.49112	1.75954	1.28303	15.6069
ENSSSCG00000029760	CIPC	12.8187	11.9404	7.91774	12.3892	12.3666	11.3728	14.4609	11.6628	15.731	12.7343	14.3485	11.6878	6.25746	3.54201	17.0419
ENSSSCG00000027516	CIR1	44.8923	37.934	48.5321	28.3951	64.6112	59.9092	59.1114	53.516	55.6585	66.4709	75.017	63.8853	67.5059	75.1062	64.2982
ENSSSCG00000009164	CISD2	75.5028	108.167	51.4851	92.8483	39.0564	48.8352	37.0075	59.1114	49.6515	59.7562	43.6242	39.0112	90.9489	103.309	59.2067
ENSSSCG00000022187	CISD3	15.9207	28.5616	16.0112	19.3116	9.2165	23.1937	18.6503	24.8553	10.1654	10.2023	18.548	23.6737	10.5428	9.2568	57.7539
ENSSSCG00000040581	CISH	14.3003	29.549	2.20897	3.16713	112.236	84.1124	82.1711	71.5066	112.287	104.954	79.2184	62.6392	5.02148	9.72307	80.3167
ENSSSCG00000009839	CIT	1.95891	0.999284	0.989774	1.60669	1.13838	0.544871	0.682438	0.366453	3.43688	1.91898	0.463888	0.344843	0.0104682	0.0400325	7.52026
ENSSSCG00000004142	CITED2	19.3997	17.8255	36.4283	24.7382	38.1478	50.7606	37.5893	20.5094	67.9882	87.0813	36.2124	66.0022	44.0144	70.9045	70.2228
ENSSSCG00000005640	CIZ1	20.9757	12.9589	25.3692	12.0988	24.4331	24.7494	17.5859	16.8467	24.585	21.084	22.2647	27.6404	17.7766	17.5655	24.3851
ENSSSCG00000009378	CKAP2	10.71	5.66842	4.26694	7.05465	2.21553	2.13058	2.51546	1.24376	6.24367	6.42069	1.54873	1.90077	0.448948	0.531738	33.8818
ENSSSCG00000008089	CKAP2L	3.15301	0.784745	1.32065	1.3302	0.683786	0.771085	0.822793	0.366895	2.21563	1.73898	0.454878	0.213159	0.160472	0.0653285	10.4788
ENSSSCG00000000171	CKAP4	11.9906	14.3997	4.39765	8.4397	1.29844	0.783009	1.37831	0.740391	2.21738	1.19234	1.48457	1.05962	6.78867	8.43605	5.5931
ENSSSCG00000013249	CKAP5	16.9848	7.36189	12.3608	10.2565	16.6122	10.7636	11.3261	7.97599	21.2128	14.0366	17.9535	12.1536	13.4668	10.9495	42.4665
ENSSSCG00000021220	CKB	0.453247	1.90698	1.75979	0.538944	9.63211	10.5053	1.95865	6.99165	20.8672	8.75569	1.98213	1.50279	5.41321	3.84311	0.193783
ENSSSCG00000021161	CKS2	37.9195	37.2696	35.9152	51.3446	8.99919	33.586	13.5256	22.1034	20.7446	42.9534	10.5589	47.3506	4.44617	13.3744	65.6535
ENSSSCG00000039157	CLASP1	7.55606	5.03744	7.90735	6.33164	11.1762	9.29127	7.10614	6.1117	15.7287	9.74995	12.1977	10.7138	6.11666	5.13043	13.8266
ENSSSCG00000040264	CLASRP	12.503	3.46187	18.5317	6.5292	10.1908	13.5516	14.8823	9.55329	6.71745	9.3343	12.7371	15.7132	5.90378	7.04762	9.66644
ENSSSCG00000006841	CLCC1	11.9625	5.07161	13.7495	7.81464	11.3355	13.8159	7.13197	6.14391	8.51973	10.9915	11.9748	13.9601	7.50903	9.32365	7.70953
ENSSSCG00000016464	CLCN1	29.3627	17.5243	17.3011	18.3441	16.9449	15.3647	19.9696	16.9016	22.5759	19.0303	27.2495	20.9741	13.1846	9.22532	40.1414
ENSSSCG00000009713	CLCN3	16.5732	17.0156	34.6519	18.4674	26.4052	22.7243	25.1629	19.7179	23.2672	23.4294	51.5726	58.2483	8.63373	6.56956	20.3877
ENSSSCG00000023026	CLCN5	0.281763	0.0648309	0.589077	0.436493	0.433457	0.251594	0.226615	0.0688362	0.916102	0.616156	0.192974	0.366737	4.33821	5.04647	1.06194
ENSSSCG00000003429	CLCN6	2.43001	2.70998	4.50684	1.78802	3.55121	4.39774	4.20536	2.71685	2.90801	3.03774	8.6292	8.42374	3.64032	4.41476	2.28057
ENSSSCG00000008024	CLCN7	16.5495	10.2618	19.0417	10.3692	14.7257	23.4779	20.9862	14.036	17.7451	20.3771	18.8956	30.4334	23.1631	35.137	10.631
ENSSSCG00000035928	CLDN3	11.5572	30.0096	2.2784	16.509	0.00387933	0.147702	0.070793	0.71165	0.170183	0.00247515	0.0011845	0.0982312	1.30285	0.344807	5.19347
ENSSSCG00000007718	CLDN4	3.99339	14.4634	1.06797	7.09564	0.380803	0.189836	0.775101	0.0907899	0.715602	0.675722	0.0011845	0.08542	0.0367516	0.111439	1.7853
ENSSSCG00000011980	CLDND1	53.6568	37.5275	56.9508	49.5225	48.8191	63.2523	40.7783	57.1798	53.7165	78.3387	75.4157	133.226	38.307	48.563	34.7805
ENSSSCG00000036814	CLEC11A	0.656552	0.604301	0.35536	0.783977	0.95291	0.731703	0.926009	1.32892	0.605859	0.689941	0.567657	0.715244	0.43946	0.618143	0.275315
ENSSSCG00000039287	CLEC12A	1.17857	3.46593	1.76593	6.94175	7.41204	8.37103	1.93104	2.03715	1.39913	2.33622	0.198593	0.426042	7.31254	7.33259	0.03104
ENSSSCG00000026569	CLEC16A	6.96841	5.70341	6.34611	4.6454	7.50521	6.01612	5.81706	4.78439	9.31639	6.68907	8.623	6.66824	6.56748	5.81075	8.28309
ENSSSCG00000013777	CLEC17A	149.294	43.2945	211.435	85.5143	0.0982057	0.581196	0.780611	1.29437	0.0901304	0.146849	0.172114	0.465431	0.965103	0.826314	4.8368
ENSSSCG00000000656	CLEC2B	1.57587	6.59898	2.63314	9.34037	19.7377	26.8187	14.0922	27.7395	25.5602	35.5626	4.26155	2.35329	17.0207	31.3333	1.76483
ENSSSCG00000023258	CLEC4F	0.249841	0.0117741	0.105132	0.327881	0.00387933	0.00100702	0.00132549	0.00422539	0.00170735	0.00247515	0.0135575	0.00498369	2.45685	1.56836	0.00079626
ENSSSCG00000000648	CLEC7A	2.5175	8.12163	0.00331914	0.00916371	0.00387933	0.567946	0.00132549	0.00422539	0.120538	0.0724196	0.137264	0.00498369	43.1418	56.0257	0.0273415
ENSSSCG00000026360	CLGN	0.399928	2.48219	1.97991	6.22854	0.00387933	0.00100702	0.00132549	0.00422539	0.00170735	0.00247515	0.0011845	0.00498369	0.00154798	0.0023305	0.222792
ENSSSCG00000039998	CLIC2	2.77323	2.87991	1.26626	1.17154	0.641435	0.943995	0.252002	0.3241	0.422134	0.565439	0.538954	0.97106	26.9695	23.7233	0.55488
ENSSSCG00000037395	CLIC3	2.23765	1.9087	2.74544	3.02594	1.73005	1.05382	1.58713	2.51803	0.816509	0.729849	2.74116	2.62018	3.00602	3.45651	0.849148
ENSSSCG00000038994	CLIC4	33.5988	37.9441	68.2668	69.2121	0.750442	0.626582	2.05936	1.71257	3.54599	1.86056	6.11889	6.21346	7.21035	5.62993	19.1778
ENSSSCG00000037416	CLIC5	1.19321	1.75554	0.740314	1.50606	0.971123	0.197007	2.1969	1.17388	4.57423	1.50715	0.777803	0.184724	0.843053	0.165768	0.975015
ENSSSCG00000017047	CLINT1	40.7148	70.5899	29.6371	31.3602	117.01	89.624	53.0718	54.1019	166.128	138.38	158.983	198.855	44.6222	34.8852	64.6314
ENSSSCG00000009793	CLIP1	5.19378	3.04946	8.03605	4.7725	11.6723	9.64643	6.77621	4.36625	13.2584	14.9671	9.04051	10.3622	18.089	22.6717	8.85993
ENSSSCG00000002921	CLIP3	0.342676	0.448223	0.603159	0.379213	2.09535	1.74288	1.62905	1.09394	1.31111	0.618657	0.660768	0.679197	1.35539	1.59081	0.7274
ENSSSCG00000008535	CLIP4	3.8176	4.25276	8.33834	9.72067	3.18198	3.46444	4.99129	4.57094	6.69079	7.2067	2.39655	3.02206	0.0429117	0.0550109	13.8805
ENSSSCG00000016095	CLK1	205.452	153.684	210.02	139.599	196.497	456.474	167.209	221.422	103.84	398.124	255.141	760.041	79.1528	121.773	123.743
ENSSSCG00000006519	CLK2	59.3752	19.1569	69.5751	22.5839	41.3654	55.715	41.2653	26.2426	34.2922	44.9591	55.8217	73.2323	25.7957	36.4608	43.6308
ENSSSCG00000001904	CLK3	40.6467	27.367	43.4317	26.1585	47.7609	46.2998	37.8365	30.8153	43.5764	45.5894	51.7239	58.3614	26.8739	34.6561	34.585
ENSSSCG00000014028	CLK4	92.0521	42.8473	116.025	50.6867	94.7912	142.769	70.3963	69.0192	63.7947	132.463	126.091	257.663	37.8818	53.4736	73.8535
ENSSSCG00000004957	CLN6	6.6615	8.63414	4.52881	5.72384	14.1936	13.4054	12.8506	14.2008	17.4057	14.3985	16.7555	14.7983	22.2326	18.9543	5.23313
ENSSSCG00000022448	CLNK	0.809478	0.671499	0.112496	0.467116	0.0489511	0.00100702	0.292891	0.0547412	0.0454944	0.00247515	0.0011845	0.0780699	0.0408063	0.0023305	8.38882
ENSSSCG00000014881	CLNS1A	56.728	78.4176	53.1813	90.9731	67.913	75.8957	65.0533	95.2957	63.0292	81.3654	63.7543	56.9276	43.5681	41.9957	72.5333
ENSSSCG00000008909	CLOCK	11.3333	3.44386	12.0549	6.25381	15.8168	15.945	7.12165	5.16955	14.3105	18.8388	17.9412	25.4557	9.03655	9.29908	8.77194
ENSSSCG00000031442	CLP1	2.6745	8.52001	2.88175	7.91979	5.27242	5.26898	3.84104	6.80901	5.06328	4.12182	3.69685	4.36204	3.75572	2.44653	3.67162
ENSSSCG00000036887	CLPB	7.72835	9.24342	6.05196	9.52886	7.47892	8.30237	6.33946	8.7282	8.40233	8.38059	4.62068	4.89996	7.57071	7.17469	5.12556
ENSSSCG00000038079	CLPP	2.76674	8.73466	2.71838	5.9689	4.19429	4.16543	4.433	7.7405	3.69622	2.71054	3.34747	2.9656	4.04293	3.9765	2.22792
ENSSSCG00000003085	CLPTM1	34.7826	30.9513	34.1513	22.4137	32.485	31.8663	35.5283	28.1031	48.8166	34.4045	43.9213	41.794	50.8897	45.4176	39.4345
ENSSSCG00000017119	CLPTM1L	145.344	117.663	140.883	96.8926	126.815	127.312	129.635	101.209	130.908	125.289	131.523	145.424	110.053	122.252	106.907
ENSSSCG00000004927	CLPX	35.7577	27.5542	30.3848	32.4414	30.1081	30.5027	24.5281	23.1406	26.233	29.1963	34.8751	37.3568	40.4264	40.6688	35.2287
ENSSSCG00000003628	CLSPN	9.03749	2.27363	7.09564	6.54198	3.71512	3.54635	3.02793	1.70333	6.82631	7.68534	4.79713	4.46967	0.721623	0.940386	11.9214
ENSSSCG00000003396	CLSTN1	10.5863	9.3683	7.81464	5.40809	22.6949	16.3073	19.3732	17.2305	23.6645	12.7701	24.1113	15.729	6.52214	4.12426	23.9591
ENSSSCG00000037131	CLTA	72.8298	102.896	46.7863	99.8728	49.0622	53.7266	61.1748	65.0072	65.7687	71.8662	62.6597	36.5611	91.519	79.6391	74.5635
ENSSSCG00000014058	CLTB	7.2908	10.7149	5.28586	6.80296	12.2122	9.6757	8.82207	13.1561	20.5302	14.712	5.22332	3.20823	37.3414	31.0799	11.1371
ENSSSCG00000022659	CLTC	25.1685	20.8735	19.6851	21.5761	30.6842	19.6237	20.4871	15.4421	44.7489	28.8438	40.1303	21.7236	49.1205	36.4433	45.6357
ENSSSCG00000009668	CLU	0.289102	0.920259	0.133372	0.406927	6.60434	6.3208	0.887553	3.67578	17.6666	5.82913	1.1343	0.288899	2.69054	0.266784	0.18446
ENSSSCG00000007955	CLUAP1	5.85319	6.41074	6.37073	5.81129	22.6413	20.539	11.6603	10.7192	8.33739	7.71479	11.9644	11.6025	3.99592	3.77994	5.78877
ENSSSCG00000017835	CLUH	6.12955	5.20673	5.36131	4.47931	5.99635	5.42375	6.36438	4.9624	7.04002	4.73661	4.40858	4.31015	11.0466	11.4882	5.17047
ENSSSCG00000009519	CLYBL	0.924714	1.15328	1.18279	1.60809	1.8834	2.21305	1.48343	1.92941	1.06385	1.24246	1.38761	1.9685	0.531738	0.41436	0.939481
ENSSSCG00000034733	CMAS	8.41816	16.9278	9.11306	13.4927	16.6355	15.461	12.5634	17.4574	17.6459	17.2853	14.221	13.4871	12.8223	12.5936	11.3578
ENSSSCG00000039763	CMBL	2.23554	5.08294	2.39098	4.57992	1.67771	1.69057	3.48443	2.80398	0.968892	1.15982	2.93565	3.04869	14.5163	12.8718	2.9315
ENSSSCG00000002689	CMIP	6.90996	9.41323	5.9808	5.71675	12.7692	10.0483	13.034	12.0258	13.6158	10.5784	14.6377	10.3731	30.3448	30.2186	12.9486
ENSSSCG00000031346	CMKLR1	0.0452567	0.0909835	0.0215081	0.0368723	0.032938	0.0581555	0.00567379	0.00422539	0.00812236	0.0302862	0.0011845	0.00498369	10.0978	12.3327	0.0142515
ENSSSCG00000003885	CMPK1	99.7421	136.695	71.3378	120.741	53.0626	54.9902	78.0211	90.8882	75.4555	78.9888	80.1503	82.9546	55.5693	41.6078	128.104
ENSSSCG00000008647	CMPK2	10.6403	10.3141	18.3859	18.3555	15.5039	13.4646	17.685	11.6872	34.281	27.4371	22.925	16.6167	39.8308	61.2891	14.3239
ENSSSCG00000011970	CMSS1	23.9825	24.2283	31.3804	51.7905	16.1413	17.869	16.6045	27.2728	12.3625	14.5995	11.4096	13.0145	16.4014	15.3734	16.4652
ENSSSCG00000038151	CMTM3	63.552	53.7337	43.9244	35.7163	101.728	61.663	101.425	59.549	120.123	70.7476	114.837	52.2688	179.485	153.002	60.5838
ENSSSCG00000032632	CMTM4	0.559265	0.204946	0.118824	0.161763	0.522558	0.370222	0.508861	0.521797	0.18882	0.362985	0.411108	0.609102	0.0598382	0.0489131	0.19986
ENSSSCG00000011234	CMTM7	364.758	155.946	254.226	179.854	68.7759	46.8765	136.27	90.081	155.887	117.803	157.164	87.2654	248.722	194.294	202.839
ENSSSCG00000022618	CMTM8	8.88875	8.5681	2.89	7.7063	20.1255	16.1704	20.4571	20.2175	8.3211	9.06238	1.40713	1.93086	0.507476	0.481156	5.42333
ENSSSCG00000001578	CMTR1	15.3117	11.1417	18.433	10.2241	9.44531	7.61777	8.97475	6.837	9.35183	8.5291	21.2259	16.4941	15.3686	17.1452	8.93098
ENSSSCG00000033156	CMTR2	3.66063	7.80487	2.26945	7.87076	6.60739	4.68663	4.71847	6.65994	7.59462	5.8506	6.3609	4.86432	4.55687	2.04996	6.44352
ENSSSCG00000026098	CMYA5	3.78065	0.796063	1.44926	1.22637	0.0432714	0.037275	0.0281159	0.0364967	0.0381465	0.0806643	0.0419738	0.130052	0.0112514	0.0627397	0.135633
ENSSSCG00000040879	CNBP	353.834	291.961	313.765	344.315	425.899	378.401	385.087	404.948	380.115	397.265	384.954	368.138	254.986	237.603	502.808
ENSSSCG00000004870	CNDP2	35.354	41.9817	23.8416	38.2177	46.7417	36.6508	38.2142	36.4306	65.3001	54.5296	34.4069	27.4633	146.624	152.6	29.3604
ENSSSCG00000036005	CNEP1R1	17.4201	26.3798	18.9285	26.1175	18.4476	23.5843	18.3713	22.1135	19.7141	25.4782	23.2439	29.5931	19.8369	19.5537	19.0834
ENSSSCG00000027256	CNIH1	20.2505	26.5229	15.1396	37.9843	22.3754	18.5207	20.063	30.0226	23.3006	22.8319	21.1004	10.7476	21.6096	16.7573	31.447
ENSSSCG00000035034	CNIH4	22.8147	28.462	17.5244	36.8558	21.7334	20.4992	25.6297	29.7594	22.3769	25.1806	19.32	21.1565	58.4328	58.9255	21.7338
ENSSSCG00000039542	CNN2	450.734	375.581	450.01	481.431	673.189	369.879	487.786	413.618	740.736	404.609	359.488	209.5	197.747	106.95	257.307
ENSSSCG00000008201	CNNM3	14.7058	13.6443	14.5723	11.1873	28.1641	25.2108	24.7812	20.3522	27.1114	20.3678	25.5727	19.3116	28.5275	21.134	23.8235
ENSSSCG00000008202	CNNM4	4.28563	4.8458	3.92397	3.11288	5.34558	5.85285	6.44517	5.4296	8.80485	7.14405	3.35498	3.5277	7.22524	7.81494	13.975
ENSSSCG00000002799	CNOT1	57.5552	22.428	58.8864	31.8057	64.9964	66.1617	41.2174	29.7294	68.356	67.6587	62.0543	76.6601	51.0556	59.4958	53.1179
ENSSSCG00000032220	CNOT10	23.7172	19.9354	22.0788	24.5489	29.2804	22.8563	22.4816	21.4081	25.1381	23.9589	22.1238	18.0886	18.0034	15.56	27.1173
ENSSSCG00000008167	CNOT11	58.0397	47.366	48.0096	60.1496	90.2427	78.5867	80.8333	72.1534	79.5361	67.1675	62.7913	55.0359	98.4266	79.2174	80.3634
ENSSSCG00000000502	CNOT2	46.5019	34.1411	39.5615	33.0838	55.8792	54.1887	40.3194	39.6924	51.2874	52.7261	59.2391	64.3865	35.4897	30.433	75.5844
ENSSSCG00000003264	CNOT3	28.8518	19.7383	29.6246	16.316	27.0901	27.1033	25.2721	22.3395	31.8578	25.813	29.1759	29.9497	25.4923	27.2135	29.0436
ENSSSCG00000021354	CNOT4	9.6521	9.35789	15.5615	8.21433	16.9073	18.5284	13.6516	11.2713	16.0963	19.897	17.745	26.5795	10.8186	15.3159	16.1107
ENSSSCG00000014009	CNOT6	23.1343	17.5455	31.6026	22.1922	16.5364	18.9224	10.913	9.19919	18.1053	15.0082	16.4198	26.9406	18.0676	18.6835	30.427
ENSSSCG00000008989	CNOT6L	43.6415	40.4783	55.1698	51.6662	45.8821	35.0261	33.027	29.4002	59.9315	42.2433	42.1323	40.9279	51.03	43.4695	45.9574
ENSSSCG00000006983	CNOT7	71.9408	77.8217	73.1632	96.5741	93.6976	84.362	66.0646	97.6393	85.3756	73.1287	87.457	76.2005	62.0661	45.0357	87.5792
ENSSSCG00000017067	CNOT8	55.6328	54.6034	48.8411	71.6777	40.5256	43.0009	34.7058	43.0085	43.5194	36.7083	32.3721	29.0986	95.1321	72.048	43.2421
ENSSSCG00000016193	CNOT9	37.7747	31.9699	30.1505	36.1356	36.5237	30.5685	31.7888	27.3934	41.2704	35.3809	38.2814	31.7533	21.8463	21.351	46.0677
ENSSSCG00000017420	CNP	73.1023	46.2203	62.0136	38.2804	112.336	61.8268	148.757	95.4298	114.022	62.2288	72.3733	39.3877	34.3847	25.1671	83.6553
ENSSSCG00000016206	CNPPD1	35.9115	37.7747	33.7113	31.4323	34.3772	39.3399	37.3	37.078	42.9386	43.6345	48.1245	41.9603	32.132	34.0692	39.1711
ENSSSCG00000000394	CNPY2	43.2945	79.0584	35.1293	68.3417	48.2634	70.7774	48.3821	73.9728	41.2438	51.5923	39.5966	39.6536	38.2224	35.5721	41.2068
ENSSSCG00000001651	CNPY3	20.2448	23.6265	26.6828	22.5547	9.69823	7.01158	9.6873	11.3141	13.1661	8.23639	12.0793	9.02479	49.8833	39.4041	14.6664
ENSSSCG00000032054	CNPY4	5.80726	9.74966	7.4348	6.85057	10.9586	9.25932	12.9267	13.7617	10.8775	9.42971	15.1101	9.76714	7.09192	6.60089	10.4838
ENSSSCG00000027849	CNR2	28.8006	28.4708	47.4223	52.8409	1.48477	0.705638	4.70008	3.15734	2.47102	0.728372	0.711327	0.273926	32.5594	19.4957	1.31917
ENSSSCG00000008349	CNRIP1	3.13169	5.40834	0.779502	0.97592	0.0836487	0.00100702	0.20647	0.00422539	0.037675	0.00247515	0.294849	0.125071	6.81348	4.74398	0.16239
ENSSSCG00000010882	CNST	20.2928	7.01714	23.0949	12.7579	10.1401	8.13738	6.59101	5.78391	11.3537	11.1188	9.22298	9.47886	7.48369	9.42351	10.389
ENSSSCG00000010974	CNTFR	0.0227879	0.328799	0.00331914	0.00916371	0.0387338	0.00100702	0.00132549	0.00422539	0.00170735	0.00247515	0.0207962	0.00498369	4.24272	2.88733	0.0304667
ENSSSCG00000005178	CNTLN	1.41263	0.214049	0.831512	0.487331	0.210802	0.128333	0.20349	0.109434	0.236441	0.129854	1.64925	2.0183	0.689402	0.990501	1.2346
ENSSSCG00000017393	CNTNAP1	0.366069	0.284402	0.59693	0.656477	0.174411	0.160278	0.202363	0.151787	1.04631	1.31553	2.90109	1.00283	0.567989	0.347266	0.225391
ENSSSCG00000017968	CNTROB	7.29286	4.65413	4.82471	2.59159	6.02131	6.61997	5.80552	5.23201	5.38164	6.20589	6.6387	9.10827	3.03049	3.18993	8.68352
ENSSSCG00000014830	COA4	10.5343	32.44	7.36872	31.7379	6.53346	10.3413	12.4435	22.1665	9.83368	12.6732	9.9412	8.06631	14.4456	11.3704	9.93661
ENSSSCG00000017398	COASY	23.6426	10.0225	27.0017	15.4895	19.254	26.9707	17.02	11.725	13.7849	22.6447	15.8123	26.5219	11.2812	17.6981	9.84204
ENSSSCG00000025598	COBLL1	8.25493	4.09422	4.61373	4.00009	0.218939	0.140325	0.0447145	0.176271	0.310307	0.520271	0.0421066	0.0675883	8.63564	6.37841	0.558485
ENSSSCG00000017248	COG1	39.4129	21.4462	40.7494	20.8841	46.0708	52.0749	37.206	27.4396	42.2042	44.6144	55.2593	58.1083	31.2582	31.9664	39.9599
ENSSSCG00000010183	COG2	20.2317	17.7541	22.7218	19.2844	22.6522	25.9473	17.1577	17.9665	23.4009	28.0396	21.6015	26.2952	23.4803	22.4563	18.6564
ENSSSCG00000023738	COG3	28.3609	24.1318	32.6943	27.7833	32.7258	36.9706	22.3505	20.4415	28.2292	36.9894	40.8938	51.9327	28.5903	29.9038	22.5169
ENSSSCG00000027973	COG4	9.78017	15.4919	9.74875	12.6321	11.7539	9.41655	10.2255	11.7467	12.5803	8.65453	12.7185	9.62699	11.5927	10.5305	11.3003
ENSSSCG00000037556	COG5	4.99353	9.06457	4.58294	8.82453	10.5114	7.87649	7.7078	9.66601	17.6021	11.2324	10.84	8.16445	8.2785	5.42883	8.9477
ENSSSCG00000009369	COG6	19.0216	16.6095	15.9913	22.1817	19.8955	17.0255	14.9647	15.4155	20.2955	20.5615	19.7713	20.4993	13.9706	14.1666	21.9818
ENSSSCG00000010799	COG7	7.16353	9.34362	8.15921	8.8732	10.7121	9.95948	9.25358	11.2832	11.7121	9.84943	9.16292	9.64271	9.30734	12.0832	11.4354
ENSSSCG00000017613	COIL	6.24606	5.63329	7.12785	7.45849	10.0684	6.88865	9.64594	7.72828	9.16337	7.85235	9.55597	7.75432	5.34251	3.90409	11.5302
ENSSSCG00000005997	COL14A1	0.615946	0.430284	0.401286	0.162496	0.191194	0.212368	0.210175	0.288834	0.22077	0.0926824	0.385496	0.4983	11.5876	7.66761	0.184751
ENSSSCG00000003603	COL16A1	0.0116558	0.0964147	0.10374	0.0584889	1.90274	1.86425	0.607878	0.830632	0.570821	1.11106	0.806861	1.39819	0.278789	0.427244	0.00079626
ENSSSCG00000038089	COL18A1	2.70154	2.07399	2.61271	2.21744	1.39233	2.19894	0.463227	0.54897	0.458402	0.821689	1.12807	1.50593	63.7324	60.6399	0.810947
ENSSSCG00000014029	COL23A1	0.175834	0.415215	0.0201241	0.441771	0.0325898	0.00565017	0.218255	0.113684	0.0177726	0.0218686	0.0392769	0.0963195	0.00154798	0.0193326	2.60613
ENSSSCG00000009545	COL4A2	0.0146475	0.0117741	0.00331914	0.0367785	0.0869513	0.00475923	0.015011	0.00422539	0.0697244	0.122148	0.00543028	0.0248845	0.0221981	0.0310074	1.78227
ENSSSCG00000005751	COL5A1	0.0274997	0.117565	0.00331914	0.00916371	0.00387933	0.00100702	0.0241601	0.0324904	0.00170735	0.0190764	0.0149119	0.00498369	1.14018	1.30683	0.00079626
ENSSSCG00000016035	COL5A2	0.639369	0.243575	0.499909	0.098284	1.16495	0.907749	0.844486	0.722126	1.21837	0.510497	1.50425	1.61544	0.505306	0.545946	3.40583
ENSSSCG00000033641	COL8A2	2.72725	0.115452	0.533529	0.231856	0.0537631	0.0157862	0.0233793	0.019746	0.0359345	0.099702	0.0178147	0.0748306	0.47713	0.0995942	0.014135
ENSSSCG00000015019	COLCA2	0.318145	0.368005	2.7291	0.717631	0.00387933	0.00100702	0.00132549	0.00422539	0.00170735	0.00247515	0.0011845	0.00498369	0.00154798	0.0023305	0.00079626
ENSSSCG00000013883	COLGALT1	27.7594	19.4663	35.5014	22.8058	15.5099	14.9854	15.8038	15.2671	17.1432	14.9085	19.7632	16.1739	67.884	68.7137	13.7762
ENSSSCG00000008376	COMMD1	59.8458	82.9772	57.3254	81.4061	60.3657	65.7651	64.8473	70.001	56.1361	60.901	76.6601	67.2261	79.0303	75.9267	76.2913
ENSSSCG00000014223	COMMD10	17.7671	22.2294	16.7882	24.7847	22.4355	19.209	14.9321	21.1822	24.1373	23.3348	20.0075	21.8096	31.2143	25.1912	21.7484
ENSSSCG00000011705	COMMD2	9.82959	21.9405	8.9625	25.32	11.8226	13.5979	10.9464	18.0365	11.7713	14.2562	15.0097	10.9731	11.1827	10.4016	13.2291
ENSSSCG00000011082	COMMD3	167.731	87.4767	186.934	152.086	50.526	81.4198	44.7088	43.4935	39.0016	84.9583	89.4601	143.82	131.806	166.677	57.161
ENSSSCG00000001884	COMMD4	40.1827	53.5223	35.3084	39.3723	39.291	44.0195	50.0305	50.0449	43.3108	50.376	43.0415	45.333	31.2523	35.674	59.7574
ENSSSCG00000035123	COMMD5	15.0426	43.7953	15.7955	41.6229	10.4222	12.0691	15.4331	22.9924	16.6484	11.289	15.8435	7.8435	22.972	17.6418	16.3959
ENSSSCG00000009464	COMMD6	71.1751	66.8929	49.4237	63.8785	99.3364	79.5124	60.6851	72.0095	100.588	89.1998	82.2737	83.9573	104.829	91.6369	78.7377
ENSSSCG00000033373	COMMD8	19.207	28.5106	13.8532	54.8247	11.5375	13.414	8.67014	17.3154	19.581	14.8036	13.1169	9.92678	24.3641	13.8249	19.0174
ENSSSCG00000013293	COMMD9	29.7072	46.5252	21.0444	31.6716	36.1503	36.895	29.9246	46.52	45.3798	30.5854	26.4955	31.6564	53.5007	45.8502	34.2491
ENSSSCG00000010132	COMT	57.2541	74.9475	43.125	57.1691	79.1357	61.2752	78.3759	85.6684	94.9544	74.2644	61.6976	43.9706	118.418	110.441	52.1575
ENSSSCG00000037237	COMTD1	2.55547	9.1787	2.85067	5.86573	3.47804	4.90495	3.23189	6.74581	6.15578	5.44891	4.18004	5.68191	2.74882	3.29271	5.04
ENSSSCG00000015509	COP1	11.8945	13.7388	12.8942	15.3359	10.6528	14.968	10.2382	14.148	10.4094	17.0437	15.3547	21.3766	71.6834	65.1846	12.4741
ENSSSCG00000006386	COPA	47.6054	37.4005	29.6629	32.9105	49.6741	27.6591	40.8771	33.6593	61.495	31.6974	59.0743	25.8772	60.4594	38.3716	63.6077
ENSSSCG00000013392	COPB1	42.6054	58.9116	30.7393	61.0814	48.85	41.2457	37.2211	50.3106	61.131	50.2717	58.2483	37.2068	53.9393	38.6898	67.3974
ENSSSCG00000011662	COPB2	45.2873	55.4784	30.1683	48.7606	44.4618	27.5214	32.0253	34.1115	54.9048	38.988	48.3748	25.5245	48.6724	41.8414	60.8298
ENSSSCG00000011616	COPG1	65.032	44.7811	48.1416	34.7885	62.7982	44.2285	51.3538	36.7441	72.2968	49.5866	73.4086	52.697	61.8834	53.1075	68.0356
ENSSSCG00000016553	COPG2	69.144	58.281	56.2086	64.0633	46.408	43.7512	48.7286	51.0259	51.9591	44.6048	58.6299	53.3644	133.732	99.9	48.2274
ENSSSCG00000004652	COPS2	61.7163	59.4692	71.1121	85.3461	65.3112	62.5668	44.564	69.228	65.2345	69.505	59.1692	71.1315	100.999	92.4276	67.1547
ENSSSCG00000018051	COPS3	42.3215	49.4855	32.8733	39.9938	34.7037	36.066	44.5112	40.6683	40.9328	31.1413	39.5886	35.3269	33.0182	28.5275	40.0557
ENSSSCG00000009241	COPS4	83.2287	87.1566	71.7742	90.2144	82.7826	79.0374	80.6278	89.3504	85.4423	90.2932	95.6673	88.9851	70.9859	65.6383	134.087
ENSSSCG00000006203	COPS5	47.5917	51.9255	38.7276	53.3704	52.6038	57.0404	44.7472	52.7298	43.8956	55.7893	52.374	59.9813	38.2338	43.1176	51.5116
ENSSSCG00000034893	COPS6	82.7255	96.0584	76.5574	82.3414	69.6427	83.4887	67.766	83.6769	72.0506	87.4962	62.5286	70.9458	79.6889	80.2081	74.2108
ENSSSCG00000000691	COPS7A	16.7801	29.6414	16.7908	23.7126	13.6351	12.09	19.5134	21.9057	15.9773	13.0735	21.7709	14.7474	29.1049	23.2771	21.1724
ENSSSCG00000033334	COPS7B	21.2268	14.5416	17.505	15.3506	19.7243	19.2934	19.0289	15.4936	20.1971	19.6028	17.9906	18.1115	12.6599	11.4701	18.2295
ENSSSCG00000016323	COPS8	53.0883	78.6389	45.1351	81.1841	83.9533	86.5326	83.03	88.8314	86.7345	85.5512	75.1783	48.2492	33.5208	30.6717	81.6635
ENSSSCG00000000290	COPZ1	112.677	116.03	86.2813	102.249	95.3696	75.7637	104.457	92.4482	108.546	93.4363	134.283	96.1675	132.466	105.447	136.329
ENSSSCG00000025190	COQ10A	1.27419	4.07492	2.54968	4.18776	1.82201	1.96254	3.79768	6.01561	1.46085	1.51934	3.19632	2.70542	2.65337	1.66682	2.96077
ENSSSCG00000016076	COQ10B	18.3263	28.5189	15.3418	34.3643	21.0274	39.873	16.6263	30.8802	27.041	33.4306	25.395	61.6733	14.6557	23.769	16.9495
ENSSSCG00000009238	COQ2	64.8275	48.094	63.9752	64.2739	81.0543	86.3045	62.0717	61.8375	66.4275	82.3528	61.6733	66.9148	57.0524	44.9555	30.4195
ENSSSCG00000005646	COQ4	12.3238	15.8147	10.1565	12.3445	14.1089	11.6088	11.7742	12.2052	17.2535	10.043	13.2804	9.68983	33.0409	26.8128	13.4499
ENSSSCG00000009903	COQ5	17.1056	28.7479	14.3023	36.7776	17.5079	15.6098	16.8256	23.5324	17.1055	17.6133	11.851	8.87778	22.2427	17.7495	18.34
ENSSSCG00000002354	COQ6	13.4468	15.7878	11.6434	14.696	13.1838	17.222	9.15002	12.389	9.83697	15.6019	12.0436	15.7945	8.12592	8.89975	10.241
ENSSSCG00000034655	COQ7	9.47957	11.1365	5.29941	12.5564	4.8584	6.45901	6.03293	7.16996	3.5391	4.61446	5.84523	5.2085	8.01907	5.13176	8.20228
ENSSSCG00000010861	COQ8A	14.0161	12.9774	10.9884	11.0759	31.672	34.3772	22.9012	21.3459	19.7417	22.5609	16.7709	19.3271	13.8461	14.0706	14.9816
ENSSSCG00000025284	COQ9	33.0256	27.6018	32.7582	26.7206	30.5217	38.9437	34.0138	38.7319	23.8144	33.0415	25.4031	29.311	27.6181	31.8342	23.1681
ENSSSCG00000038055	CORO1A	985.032	1318.57	996.671	1294.86	1471.64	946.597	1261.03	1192.38	1580.87	893.104	1443.59	974.254	632.366	443.743	1203.87
ENSSSCG00000012920	CORO1B	8.15326	11.9035	4.15649	4.34027	7.83073	5.57868	6.57753	7.53796	6.57362	3.94224	10.944	7.18337	90.7798	73.369	6.31409
ENSSSCG00000009944	CORO1C	22.5845	31.4837	12.5723	22.4635	37.8762	25.2243	19.0793	15.3088	52.6498	30.0627	44.7843	25.8035	47.5873	37.9067	92.258
ENSSSCG00000005375	CORO2A	0.328799	1.0791	0.155996	0.247964	0.575565	0.65808	0.2943	0.324563	0.471031	0.511813	4.55083	4.62448	2.85338	4.57812	0.119835
ENSSSCG00000004962	CORO2B	0.348732	0.296649	0.00331914	0.00916371	1.98873	1.76983	0.168617	0.141215	0.891419	0.964469	0.251645	0.376844	0.0404203	0.0023305	0.296502
ENSSSCG00000018075	COX1	24477.1	18371.4	27085.6	33314.3	23588.3	16031.6	19369.1	19369.1	27374.9	27374.9	22251.3	19734.8	28868.5	23242.4	22342.4
ENSSSCG00000018023	COX10	7.21549	8.74579	3.91034	6.34482	6.71205	5.84318	4.55435	6.51999	7.59671	5.5005	7.02246	6.02787	11.5671	13.4176	6.17881
ENSSSCG00000031433	COX11	6.10725	20.3285	7.41241	20.3437	8.8353	11.0879	7.97926	15.6298	9.02316	10.9222	9.28489	9.09442	7.32685	6.90358	7.6447
ENSSSCG00000010541	COX15	4.62519	11.1139	4.62493	8.66472	7.64539	6.09884	6.1984	7.52123	7.3885	5.90635	8.18666	7.01159	7.05412	5.50879	7.18443
ENSSSCG00000002316	COX16	21.463	48.9815	23.6722	43.0187	19.6695	29.2264	23.3003	33.027	14.972	23.0378	22.5386	38.6535	13.6849	12.2024	22.2242
ENSSSCG00000011893	COX17	371.359	579.707	345.048	626.836	324.87	419.683	404.948	445.067	408.475	505.049	193.876	210.469	300.951	290.613	175.927
ENSSSCG00000008947	COX18	5.5709	9.54864	5.70641	11.2018	8.12275	8.31879	7.03941	6.60662	6.73222	7.81994	8.5611	11.99	3.82335	5.37779	4.82086
ENSSSCG00000038964	COX19	11.5621	11.3838	8.36691	9.5365	24.4567	13.9425	26.2781	15.9693	20.5774	12.4755	24.7451	12.4454	27.4182	20.9616	24.8637
ENSSSCG00000018078	COX2	21115.6	11481.1	25067.4	27085.6	20829	10709.8	26640.8	13544.9	21690.5	23130.8	32953	12458.6	24506.5	20741.1	23580.4
ENSSSCG00000039618	COX20	73.1916	79.7098	54.7633	68.5621	84.2674	149.534	88.9339	130.709	56.4144	105.375	76.5559	106.121	33.8311	34.6714	86.478
ENSSSCG00000018082	COX3	18371.4	9541.73	22596	20541.9	19864.4	9083.26	22844.6	11339.2	23130.8	21690.5	18276.2	10483.5	23242.4	16294.3	19843.4
ENSSSCG00000029034	COX4I1	428.359	946.167	407.326	674.22	586.838	655.168	744.25	971.254	537.079	554.467	616.906	573.379	604.715	571.593	585.267
ENSSSCG00000024316	COX5A	305.675	297.204	224.658	305.159	317.727	244.994	445.067	316.004	374.783	366.039	357.136	216.581	386.945	317.998	337.937
ENSSSCG00000008195	COX5B	87.6488	261.821	65.7894	163.547	75.5155	112.336	98.1056	184.236	87.7284	102.519	70.3151	68.535	106.852	123.179	111.575
ENSSSCG00000039265	COX6A1	44.3128	144.714	42.1452	87.5893	57.4245	79.8722	68.5231	105.106	61.0393	77.8005	55.8912	56.013	52.7081	61.3627	66.1421
ENSSSCG00000036789	COX6A2	17.8598	17.5765	24.8289	17.5824	20.2553	19.8808	14.76	13.401	11.5685	17.0818	19.5606	23.0859	10.1569	14.4169	9.04751
ENSSSCG00000037792	COX7A1	0.486857	3.43643	1.72342	2.58724	0.402823	0.683034	1.07066	1.87041	0.511813	0.839071	1.8505	2.05923	1.5635	3.61974	1.58133
ENSSSCG00000004480	COX7A2	335.475	474.776	205.847	455.581	291.259	351.43	293.495	441.514	283.884	369.213	215.62	239.684	272.287	296.496	353.965
ENSSSCG00000008466	COX7A2L	201.105	411.268	181.536	354.807	343.074	389.354	323.29	485.92	324.445	455.621	310.824	323.501	244.907	251.488	248.447
ENSSSCG00000040325	COX7C	108.004	227.494	110.958	213.861	108.824	162.996	121.237	241.351	88.5363	165.061	97.6595	111.528	147.243	185.492	102.366
ENSSSCG00000013046	COX8A	654.665	1036.25	451.156	728.451	774.194	673.189	877.128	1030.75	905.885	748.081	760.041	643.169	750.549	644.669	1000.63
ENSSSCG00000016555	CPA4	0.495347	0.402708	0.624361	0.338188	0.505136	1.95379	0.254124	0.660219	0.810899	2.44176	1.03122	5.33882	0.625816	2.0328	0.365746
ENSSSCG00000017799	CPD	1.36555	3.08146	0.875161	1.423	10.028	6.24687	15.6298	11.518	36.8446	24.2444	13.7774	4.81895	18.6878	13.4954	23.784
ENSSSCG00000038410	CPEB2	3.80589	3.59054	7.35546	5.39842	7.95131	7.81636	3.3127	2.31313	13.4286	15.9695	8.57872	13.1892	15.9763	29.2019	6.48278
ENSSSCG00000010468	CPEB3	1.13192	0.39889	1.04157	1.54279	0.363655	0.230342	0.257243	0.0719761	0.472431	0.226453	0.462219	0.621381	2.75813	2.44522	2.55467
ENSSSCG00000016981	CPEB4	5.37979	3.19677	6.40556	4.26694	6.58659	7.75835	4.68272	3.07259	6.91485	9.57844	5.91882	11.9176	9.78757	13.1349	8.04833
ENSSSCG00000016618	CPED1	0.0387174	0.0366126	0.154689	0.339787	0.0216135	0.00100702	0.00826368	0.0889787	0.00170735	0.0292496	0.00859223	0.00498369	1.41574	0.654322	0.0928393
ENSSSCG00000016843	CPLANE1	1.12852	0.101787	0.233807	0.416245	1.02891	1.39786	0.298558	0.137827	1.62991	1.92019	0.500621	0.4247	0.66069	1.07677	0.979231
ENSSSCG00000023630	CPM	0.581533	1.17679	0.466331	1.18	10.5595	8.34859	1.27666	0.812424	6.95877	5.61114	0.29941	0.24755	50.6956	32.2166	22.2358
ENSSSCG00000010545	CPN1	1.62235	3.18488	2.76907	3.6132	1.31565	1.51194	0.93415	0.710843	1.05679	1.75985	0.972357	1.69841	0.479071	0.835044	0.723159
ENSSSCG00000021519	CPNE2	8.64651	10.6603	1.80336	2.50383	20.6981	19.4528	33.6272	28.9378	7.47364	6.43712	14.1553	16.6021	2.12288	1.33121	135.473
ENSSSCG00000006135	CPNE3	18.3035	24.9215	15.8809	19.194	34.8657	16.8122	22.0712	24.6902	46.2835	27.0873	43.1356	25.5388	19.9284	12.3371	41.7337
ENSSSCG00000011978	CPOX	14.9435	16.4928	5.95999	13.6068	7.24137	5.40331	6.40058	8.09342	12.0498	8.3726	8.00548	7.26802	14.675	11.6472	27.3897
ENSSSCG00000024206	CPPED1	4.17943	15.3189	2.4613	5.57211	5.10814	3.53398	11.9742	9.47384	10.5503	3.74534	26.3172	13.4327	11.6884	9.97775	12.0327
ENSSSCG00000006087	CPQ	0.183209	0.507628	0.00331914	0.00916371	0.00387933	0.00100702	0.32072	0.100778	0.00170735	0.00247515	0.0011845	0.00498369	4.22418	3.48659	1.26278
ENSSSCG00000002447	CPSF2	24.99	21.5557	22.4022	26.8617	26.6701	19.405	22.2723	20.9862	21.7632	18.9542	24.3615	18.6196	23.2303	20.8923	32.1017
ENSSSCG00000020799	CPSF3	12.4163	13.5247	11.3787	14.9189	13.4197	10.3589	9.97649	10.6018	12.2194	10.6266	11.9792	9.03099	18.4597	16.2174	12.5173
ENSSSCG00000026896	CPSF4	19.4022	23.8061	17.5139	25.0043	15.8208	19.3975	18.263	21.9123	15.4007	16.3911	14.1163	14.068	16.5338	14.0063	20.4574
ENSSSCG00000038031	CPSF6	62.8114	40.8039	51.1447	44.0145	51.5873	41.9946	29.6928	28.2764	43.2016	49.0058	40.5682	47.8259	29.0163	29.7753	50.5533
ENSSSCG00000013083	CPSF7	30.5388	24.4588	32.7867	21.4325	37.2977	32.4081	30.2025	27.1333	36.4785	29.0752	41.1314	36.0009	21.8065	23.0457	41.5914
ENSSSCG00000012880	CPT1A	8.52001	18.9273	8.26905	13.6309	11.0932	17.6137	9.1886	13.4511	14.0601	21.3014	6.52568	26.5608	22.2949	23.8106	11.6039
ENSSSCG00000022364	CPT1B	9.51251	2.54852	12.3773	4.59735	4.13315	6.24933	4.26793	2.13468	3.13789	7.99077	6.00372	10.6361	0.866249	2.13989	2.43368
ENSSSCG00000024872	CPT1C	1.56003	0.19976	1.85995	0.355789	0.0930004	0.0413209	0.241817	0.0318069	0.201989	0.222694	0.434191	0.580471	6.37361	6.87868	0.743048
ENSSSCG00000003851	CPT2	8.62947	10.2102	8.17275	8.34998	11.7834	9.2762	12.0915	8.48694	12.174	10.4073	11.9337	5.26874	14.1197	12.1641	9.96537
ENSSSCG00000000732	CRACR2A	0.388818	0.312787	0.381774	0.26282	1.62244	2.01453	2.27164	1.37079	2.88051	2.87442	1.95809	3.07509	0.337336	0.903618	3.82169
ENSSSCG00000000910	CRADD	19.118	25.4635	4.89113	15.1867	25.0312	20.2553	24.9389	21.697	48.5801	60.1076	51.3075	40.2854	9.53081	9.36317	27.5691
ENSSSCG00000008026	CRAMP1	10.4048	5.18796	12.0724	5.10103	13.9864	18.0426	12.5034	8.16584	13.8069	15.3871	15.74	20.8011	7.33984	10.6241	7.40921
ENSSSCG00000005671	CRAT	19.7562	13.9584	13.5085	10.96	19.311	13.4931	19.5433	12.2676	29.1183	16.0257	19.9837	10.6574	33.5533	20.8116	24.5776
ENSSSCG00000011530	CRBN	28.1535	38.9873	34.549	39.7188	43.4816	44.3666	26.7253	38.3644	37.1084	41.3302	37.6466	43.4444	29.2557	25.0698	35.6298
ENSSSCG00000032119	CRCP	23.7354	31.8777	24.3081	33.2483	34.6492	32.6412	26.7643	32.1631	32.0745	30.4461	36.1746	32.2901	25.4175	23.4357	41.6447
ENSSSCG00000034395	CREB1	20.8088	13.5095	40.2143	26.0213	32.442	30.2715	16.2563	16.4231	27.2926	33.3928	25.8978	34.3703	18.5477	21.6146	20.7224
ENSSSCG00000005318	CREB3	54.9193	62.0352	53.3876	58.1128	56.6484	52.7718	56.3088	57.3101	56.3582	54.3327	61.6185	59.491	47.1135	43.895	57.3137
ENSSSCG00000013263	CREB3L1	0.290983	0.988411	1.0017	2.00328	3.21114	2.65971	2.8849	3.02465	9.36083	5.42872	1.15772	0.59751	0.755068	0.305129	5.29408
ENSSSCG00000016520	CREB3L2	2.21813	1.97408	0.798742	1.25483	0.74369	0.385881	0.671966	0.203096	1.10397	0.7633	1.6183	1.18698	11.1934	8.73573	1.03423
ENSSSCG00000016690	CREB5	0.0459857	0.0117741	0.00331914	0.00916371	0.00387933	0.0109035	0.00132549	0.00422539	0.00170735	0.00247515	0.0011845	0.00498369	1.96459	3.25273	0.00079626
ENSSSCG00000007951	CREBBP	16.7445	11.0664	28.5195	8.62286	26.4364	32.234	12.3053	12.4961	26.1881	23.6226	26.0749	36.9675	15.28	20.6094	21.6372
ENSSSCG00000034418	CREBL2	10.8869	18.9219	9.4102	17.0523	22.9941	23.3195	15.3864	25.9148	24.6717	26.0578	15.8038	13.6299	48.699	41.4585	12.8616
ENSSSCG00000016986	CREBRF	4.18111	3.01926	9.33678	5.63453	10.8055	16.0932	4.01328	4.57903	9.95907	14.1836	7.34899	16.9503	6.41651	11.6599	3.34753
ENSSSCG00000014907	CREBZF	68.0885	14.7485	65.582	34.6368	60.4335	61.9797	38.5386	25.139	41.8895	49.3345	58.3614	78.9697	21.7738	25.1779	44.8418
ENSSSCG00000006308	CREG1	17.3273	27.749	12.0021	25.3791	44.9697	36.852	39.6543	47.8152	44.5274	30.5466	43.6611	26.764	131.726	87.6323	37.9596
ENSSSCG00000011560	CRELD1	9.89891	23.0434	8.56795	13.9396	18.1246	17.0204	16.5364	20.5673	18.4608	20.5124	25.1134	20.7795	13.5883	12.2941	17.7277
ENSSSCG00000000981	CRELD2	21.4206	27.8783	8.6186	16.5992	6.82762	6.65293	9.30906	7.75825	8.83855	10.2226	8.5829	8.00548	6.96395	6.07246	13.0003
ENSSSCG00000011106	CREM	23.53	32.7517	26.5525	36.5262	16.3731	30.3664	15.2671	17.4503	11.9526	18.6984	17.0218	25.0767	53.2384	54.7476	24.9426
ENSSSCG00000014093	CRHBP	1.28823	3.64341	1.46506	5.24095	0.194372	0.263386	0.0704671	0.0303927	0.44023	0.789665	0.0849807	0.202089	24.7401	20.3588	0.291118
ENSSSCG00000008504	CRIM1	0.456492	0.749875	0.605455	0.732007	3.00015	1.59457	0.263119	0.153019	6.2344	2.68904	1.60933	1.19656	0.265337	0.0857859	0.287292
ENSSSCG00000038713	CRIP2	2.28655	8.10693	1.58594	1.94372	1.22852	0.794626	1.97687	1.59531	5.38766	2.48049	12.1473	7.83738	1.33619	1.72062	1.12244
ENSSSCG00000001672	CRIP3	49.4297	16.0455	31.0715	23.7363	0.43023	0.0961428	0.00132549	0.00422539	0.0962533	0.00247515	0.0011845	0.00498369	0.0945256	0.212963	1.12672
ENSSSCG00000038989	CRK	177.505	108.556	126.646	107.206	100.311	81.485	100.262	75.3656	121.022	103.359	116.687	124.985	215.037	182.312	159.75
ENSSSCG00000010095	CRKL	67.0242	63.8737	59.1104	48.2925	83.3884	55.4006	67.2069	49.7623	90.7446	61.2991	87.0701	61.849	63.585	51.8736	97.5203
ENSSSCG00000017743	CRLF3	118.987	104.12	132.639	126.957	254.399	235.117	196.821	193.569	194.431	199.006	136.237	160.199	122.109	122.609	160.236
ENSSSCG00000040202	CRLS1	5.42145	5.36619	4.69727	10.5738	6.03532	5.94617	6.05044	8.69909	7.13636	5.22512	6.43469	5.39471	8.38719	5.78662	7.38774
ENSSSCG00000038587	CRNKL1	32.7743	27.3214	34.5026	27.8374	46.9815	30.4398	46.1257	28.5598	43.09	33.5145	45.2616	32.6886	30.7127	29.8664	45.0273
ENSSSCG00000003478	CROCC	1.17299	1.43581	1.16205	0.823514	1.10578	0.851361	0.908443	0.434787	1.19575	0.769154	2.9995	2.4485	1.43115	1.1664	0.953312
ENSSSCG00000015391	CROT	4.089	5.17254	4.50539	5.81913	6.56914	6.85328	3.78591	4.00573	7.83239	8.21393	2.103	2.84297	9.82143	9.67428	2.98065
ENSSSCG00000015358	CRPPA	0.846165	1.61812	1.7315	2.39759	1.92756	2.20632	0.8301	1.0073	1.98781	3.58043	1.34473	3.37091	0.776243	1.03538	2.09888
ENSSSCG00000015137	CRTAM	0.218724	0.348447	0.02958	0.00916371	7.00869	6.00148	14.8273	13.8344	2.86272	3.66174	0.523799	0.448757	0.0282888	0.211736	7.06936
ENSSSCG00000039054	CRTAP	2.24278	1.54039	4.30594	3.26572	1.25267	0.793436	1.04027	1.07674	2.9948	2.53424	5.60277	4.03853	35.8784	23.1717	0.970016
ENSSSCG00000013915	CRTC1	3.17947	6.39611	3.08034	2.74982	6.28555	5.43202	6.68302	6.59808	5.00819	4.74299	9.64505	13.1126	2.3005	1.90258	9.23571
ENSSSCG00000006567	CRTC2	32.0105	32.5921	45.4654	24.6462	46.1545	56.4438	42.894	41.8489	56.0688	50.6527	54.681	66.7837	37.4034	43.9918	26.2024
ENSSSCG00000034090	CRTC3	7.51056	7.52566	10.9425	5.31932	29.0706	32.3134	16.8037	15.851	18.5362	17.5529	16.4901	18.6408	23.1808	23.5497	17.14
ENSSSCG00000000164	CRY1	14.8453	16.6145	14.6374	17.3919	20.0262	19.4287	19.8634	22.443	23.5824	28.3307	24.9562	26.8082	12.8148	15.4675	45.0929
ENSSSCG00000013270	CRY2	2.36794	4.44931	3.13254	3.03744	6.7221	6.52287	5.32629	5.21958	4.24907	3.69279	6.12869	5.8575	3.05949	2.30474	5.04791
ENSSSCG00000009964	CRYBB1	1.17979	7.49912	1.1013	3.05044	0.567946	0.420004	2.14149	3.97761	0.962733	0.489625	2.16018	1.72249	1.50392	1.16982	0.769637
ENSSSCG00000004371	CRYBG1	3.45152	2.77664	8.23715	5.72885	8.80333	6.67504	3.71605	3.57808	16.8083	16.3306	7.14536	5.11819	22.5063	22.8826	3.88072
ENSSSCG00000033539	CRYBG2	0.32661	0.264872	0.107923	0.100488	0.102554	0.104389	1.49548	1.40713	0.839071	1.30858	2.63376	2.00811	0.0890325	0.0023305	6.58479
ENSSSCG00000022895	CRYBG3	0.14814	0.149188	0.0529269	0.00916371	0.0190512	0.0702343	0.00132549	0.00422539	0.0273911	0.0154568	0.392649	0.675293	10.325	10.8784	0.136866
ENSSSCG00000009268	CRYL1	15.2624	28.3501	12.5252	14.5045	38.8627	35.1238	32.4153	37.0185	29.376	22.2997	30.854	26.0618	30.9781	26.6883	26.2989
ENSSSCG00000003780	CRYZ	2.99447	7.33494	2.38244	7.33124	0.715858	0.959323	0.481576	0.958677	0.888467	0.477774	1.16971	1.8378	25.4048	20.3152	0.212232
ENSSSCG00000028377	CRYZL1	0.221925	11.6221	0.321799	7.1745	0.83807	0.559158	0.244142	0.00422539	0.819005	1.04347	0.630137	1.88734	1.0928	0.368905	0.443438
ENSSSCG00000035686	CS	83.2929	83.1231	75.9203	74.6685	87.5166	61.7283	94.8264	70.5705	107.187	76.8196	99.429	69.5276	123.547	98.323	99.6163
ENSSSCG00000000259	CSAD	4.75039	3.94494	6.313	5.19945	7.15278	4.71628	6.68093	6.798	4.27002	4.76342	4.43333	4.99893	5.50879	4.81192	3.86236
ENSSSCG00000000062	CSDC2	0.127527	2.41271	0.346559	0.00916371	12.0488	10.3049	2.85268	3.46671	3.65358	2.95669	5.38726	3.03029	0.0310074	0.0763477	1.1319
ENSSSCG00000006752	CSDE1	165.32	122.977	131.725	105.751	172.322	141.567	139.058	145.761	161.841	150.369	182.925	162.506	194.791	176.447	170.823
ENSSSCG00000025534	CSE1L	68.251	61.852	67.6446	81.5166	68.5071	81.7273	42.0629	55.0451	60.3788	79.5361	66.7837	98.6111	44.181	55.466	70.6876
ENSSSCG00000037449	CSF1	0.585004	0.698202	0.14498	0.131155	2.21305	2.03941	2.4982	2.11767	6.10894	4.92557	0.587584	0.767591	0.899784	1.82385	0.0549051
ENSSSCG00000014441	CSF1R	0.316323	0.522038	0.541363	0.192345	0.255535	0.896476	0.150199	0.0603704	0.121763	1.15434	0.376844	0.128123	400.009	371.001	0.0770888
ENSSSCG00000000136	CSF2RB	23.7137	14.8021	21.0242	13.8873	0.899157	1.32002	0.0940745	0.413076	0.842806	0.845314	0.330609	0.362553	100.126	97.6372	1.04966
ENSSSCG00000025795	CSF3R	5.89268	4.16637	5.66181	4.88532	0.0768339	0.453091	0.0944863	0.147385	0.033314	0.486822	0.267168	0.04718	210.099	156.228	0.208565
ENSSSCG00000010200	CSGALNACT2	27.7393	25.2982	24.9883	20.52	23.5904	17.8477	19.1422	17.7751	25.397	25.1423	32.3912	27.0555	44.3655	48.1597	51.1957
ENSSSCG00000001900	CSK	220.523	181.395	233.612	164.542	266.697	180.074	236.048	154.965	332.328	177.642	343.92	234.224	164.856	139.417	195.783
ENSSSCG00000027847	CSKMT	3.81015	11.9458	7.69817	11.091	3.66173	7.33064	4.53496	9.86102	4.13752	9.90086	2.85259	5.75635	3.91774	3.29426	2.25253
ENSSSCG00000014435	CSNK1A1	84.605	81.8875	67.5184	71.9804	126.247	85.097	89.0693	71.3311	129.568	103.203	109.714	84.3718	126.772	97.7344	129.818
ENSSSCG00000035852	CSNK1D	22.5442	22.8666	19.7194	16.6662	30.791	25.3991	32.041	24.9751	32.0222	23.5947	33.1945	26.9754	36.8111	33.1422	31.2667
ENSSSCG00000004558	CSNK1G1	7.32056	5.40986	8.65381	5.68811	10.8145	10.9003	9.3714	8.06216	12.0679	12.0854	9.28875	12.808	8.9811	9.57962	9.80924
ENSSSCG00000013445	CSNK1G2	76.4279	54.0905	79.3044	46.6385	104.292	99.8583	105.994	85.3225	113.685	101.537	106.446	105.453	58.399	59.9101	81.8099
ENSSSCG00000014240	CSNK1G3	24.8331	17.5287	41.1941	23.1333	32.5411	37.4975	19.9555	22.5473	25.4933	32.6226	17.2087	30.3814	14.9547	20.6598	19.9845
ENSSSCG00000002804	CSNK2A2	40.674	31.106	38.2409	27.3812	51.4345	44.8331	42.1963	35.1893	58.8464	52.0093	54.3782	53.0893	47.5375	45.6463	50.1395
ENSSSCG00000039224	CSPG5	0.591244	0.126874	0.863656	0.383848	0.728244	0.316649	2.54305	0.210175	0.367532	0.465368	0.745133	0.549015	0.485636	0.385006	0.413007
ENSSSCG00000006202	CSPP1	7.45008	2.3648	8.73037	5.59817	5.23945	6.54329	3.85154	2.59532	4.60254	7.29609	8.96003	12.4775	3.40369	6.29632	4.97337
ENSSSCG00000011264	CSRNP1	17.0497	16.7254	42.132	27.7742	12.1635	50.9439	22.1325	20.53	15.6274	47.7281	18.8363	55.5742	24.334	44.0486	18.3909
ENSSSCG00000037029	CSRNP2	7.07779	7.3107	9.5214	5.26602	23.7017	26.5718	12.7448	17.0449	22.9599	25.2762	11.6228	19.5028	11.2291	14.1066	10.1463
ENSSSCG00000020976	CSRP1	74.0582	95.0264	40.4225	51.3252	74.9855	58.2865	53.9901	51.1215	82.8635	55.8722	120.974	72.4871	113.564	82.7871	90.1995
ENSSSCG00000037360	CST3	75.3346	120.494	2.06633	4.29762	0.950444	6.53953	0.933262	1.93741	0.989466	3.23699	12.2635	9.01101	1488.27	865.462	2.68265
ENSSSCG00000007131	CST7	18.1352	99.6048	0.153887	1.02424	88.034	58.8376	336.84	237.703	204.619	155.222	210.942	165.274	25.06	13.5598	543.909
ENSSSCG00000027357	CSTB	99.118	183.147	70.1573	72.838	165.013	156.1	165.983	172.355	188.339	153.06	234.614	195	659.657	554.907	161.815
ENSSSCG00000007494	CSTF1	13.8635	11.9906	12.8249	16.6083	14.2222	11.9583	11.667	11.1987	13.838	12.0157	11.4909	10.7644	8.7831	9.24029	14.578
ENSSSCG00000012486	CSTF2	7.96757	9.86902	7.45849	8.86627	7.44944	6.63664	5.70365	5.72371	7.41957	7.13636	7.56513	7.48517	7.13697	6.57346	9.01121
ENSSSCG00000010430	CSTF2T	39.3666	24.2452	14.1928	25.4387	38.4956	19.4237	31.8363	30.0891	44.9237	19.0807	28.2739	9.6574	24.2267	9.11012	96.8666
ENSSSCG00000040954	CSTF3	26.0012	20.1515	32.9438	30.5316	20.3058	27.6261	14.5714	15.7783	20.5054	27.4844	22.2358	37.9371	20.4635	28.4196	18.037
ENSSSCG00000031302	CTBP1	138.161	105.427	141.775	75.7259	189.586	152.35	187.047	133.056	195.609	156.004	274.115	261.272	97.0343	87.0672	175.566
ENSSSCG00000010739	CTBP2	1.5517	0.728232	0.270024	0.202079	1.60567	1.2543	0.290677	0.0647141	0.463937	0.452376	0.375098	0.21475	20.042	20.0895	0.0152839
ENSSSCG00000024253	CTCF	50.9279	31.6281	46.6548	29.6998	63.8358	47.5327	42.0893	26.1358	64.1237	42.8329	60.1052	46.9081	30.7299	24.1447	89.3815
ENSSSCG00000017935	CTDNEP1	102.896	82.1904	106.057	70.5116	113.171	95.3696	133.189	81.1901	110.771	100.436	127.077	121.566	111.83	104.083	111.236
ENSSSCG00000005787	CTDP1	21.1082	15.6721	18.7442	13.0796	25.3653	19.5692	23.8674	16.8654	28.0842	21.2176	27.2633	20.0645	20.6539	20.4874	24.502
ENSSSCG00000036938	CTDSP1	105.999	96.7029	101.229	72.6697	83.3534	63.9491	94.4833	68.5231	141.698	76.1822	168.335	91.7121	150.36	133.038	178.735
ENSSSCG00000031707	CTDSP2	42.4447	28.893	25.0576	19.3331	74.6448	64.6332	50.9084	40.8567	58.5083	54.0839	56.5667	47.9766	71.0257	62.0105	57.4801
ENSSSCG00000035827	CTDSPL2	25.5313	17.6994	22.0674	24.2005	22.5487	22.2567	12.7898	14.3217	21.3881	24.5469	20.5438	24.4775	14.6464	17.511	28.4522
ENSSSCG00000004506	CTIF	0.680749	0.471804	1.88111	1.07512	0.87364	0.435262	0.698117	0.668303	0.69879	0.850193	0.899888	0.656084	5.56433	5.32406	3.28406
ENSSSCG00000016122	CTLA4	0.0767315	1.8699	0.00331914	0.123978	6.17685	7.73726	1.50176	1.44844	6.93576	13.2239	0.0531475	0.00498369	0.0318283	0.0023305	0.0234662
ENSSSCG00000014339	CTNNA1	5.8381	2.60582	1.63845	0.951302	4.62214	1.92141	5.67064	2.26313	2.73907	1.43767	12.4834	3.36059	44.2159	26.4906	36.0652
ENSSSCG00000011274	CTNNB1	81.0131	51.0156	51.8379	40.8606	141.868	131.789	88.5548	69.5009	125.289	125.551	104.176	118.037	98.8976	90.3923	101.394
ENSSSCG00000036868	CTNNBIP1	1.18683	3.98933	1.37973	2.05271	3.60596	3.7298	3.67129	5.60631	4.13427	3.19298	4.04169	3.45675	4.44442	3.35876	5.99127
ENSSSCG00000007337	CTNNBL1	39.8919	41.3329	36.8346	37.0727	52.1758	37.058	47.4977	41.3901	45.0821	36.3585	54.2156	41.4021	33.1641	31.7819	54.3962
ENSSSCG00000013174	CTNND1	1.86461	0.281763	0.233454	0.0411601	0.0658762	0.170653	0.0989373	0.117287	0.178762	0.0688975	0.0209552	0.0243774	30.1217	27.4625	0.965892
ENSSSCG00000017865	CTNS	3.89556	6.05878	3.7713	6.32356	4.3918	2.88138	4.37107	3.5811	4.93918	2.84582	4.08697	2.89664	7.94888	7.46726	3.29124
ENSSSCG00000003973	CTPS1	9.42769	8.59964	6.78619	6.36466	13.3472	12.966	11.9646	8.67914	12.3388	11.7047	9.6197	9.49693	2.66365	2.74321	6.88668
ENSSSCG00000012146	CTPS2	19.1614	31.5903	20.0308	28.8274	26.6136	24.579	20.5426	26.5837	27.7956	26.6187	28.8912	25.7788	30.1679	30.4423	19.0934
ENSSSCG00000013406	CTR9	19.6229	9.82065	17.4984	11.8775	21.7995	14.1089	17.8416	9.97649	25.6514	15.5316	24.0396	15.2303	15.9502	13.1553	29.5604
ENSSSCG00000003458	CTRC	101.25	73.5851	28.1636	28.6654	64.1768	51.2558	161.923	76.4808	129.002	83.348	51.8723	28.8376	371.001	286.019	561.265
ENSSSCG00000007431	CTSA	60.8208	72.8298	49.7678	37.7308	101.096	80.2981	121.774	101.372	155.557	94.0263	132.232	95.3275	166.677	155.051	199.204
ENSSSCG00000023666	CTSB	100.625	135.12	95.1524	120.24	125.45	110.151	81.725	99.0847	197.93	152.187	92.6289	53.7539	1348.68	1043.42	82.8794
ENSSSCG00000014924	CTSC	340.089	266.059	66.1625	119.927	1019.9	796.308	597.122	782.674	831.802	697.579	402.304	346.239	1050.88	933.527	282.481
ENSSSCG00000040793	CTSD	15.163	26.6724	2.87057	3.81638	27.4947	22.1226	63.8718	55.5585	39.6327	23.5556	46.8044	28.8492	65.4286	48.6232	138.153
ENSSSCG00000040793	CTSD	15.163	26.6724	2.87057	3.81638	27.4947	22.1226	63.8718	55.5585	39.6327	23.5556	46.8044	28.8492	65.4286	48.6232	138.153
ENSSSCG00000038918	CTSF	9.97338	16.6217	9.81829	9.39035	19.6828	23.219	20.1075	21.4402	18.8831	20.8672	22.9815	26.419	15.4088	13.5411	14.5845
ENSSSCG00000001770	CTSH	110.785	92.5186	211.212	179.436	57.0404	30.9724	45.946	27.2679	70.1644	40.5473	51.9327	21.8766	372.786	324.018	15.3886
ENSSSCG00000008867	CTSO	20.8454	22.6491	24.3875	33.3512	13.8731	9.00938	12.0954	17.3177	11.9759	8.69904	20.9869	10.0852	17.8679	15.9331	20.7628
ENSSSCG00000006648	CTSS	203.73	242.159	204.02	298.58	89.1261	94.2974	61.9003	81.0549	113.184	119.635	111.305	82.9954	2941.26	2711.67	70.3926
ENSSSCG00000012970	CTSW	129.537	376.547	1.02634	2.96173	447.918	355.666	1688.77	1460.01	289.049	259.82	941.559	599.299	0.763125	0.954805	2372.45
ENSSSCG00000007522	CTSZ	198.954	121.103	162.426	141.092	10.2013	15.6794	12.7793	14.5497	15.3042	17.3225	20.3787	17.182	1004.1	838.62	40.3208
ENSSSCG00000031769	CTTN	0.510432	0.149683	0.0790239	0.222585	0.132787	0.00100702	0.028	0.287955	0.43727	0.100567	0.0011845	0.0333854	0.159751	0.0668932	2.23941
ENSSSCG00000016625	CTTNBP2	0.891025	0.387765	0.0907712	0.0508346	0.111376	0.23324	0.020118	0.0698578	0.0374296	0.123418	0.0116108	0.0837037	0.531421	0.215402	0.0590445
ENSSSCG00000006781	CTTNBP2NL	0.15295	0.110043	0.0649744	0.00916371	0.0260652	0.00100702	0.00132549	0.00422539	0.0726505	0.0171016	0.0563426	0.00498369	4.87137	3.45336	0.00079626
ENSSSCG00000033920	CTU2	21.8743	16.8473	23.5875	17.0689	24.7301	28.7306	22.7192	22.6977	16.6667	16.979	19.4325	26.7713	15.1356	17.1673	13.488
ENSSSCG00000011030	CUBN	0.134594	0.0348376	0.829631	0.14498	0.583153	0.294382	0.195219	0.268656	0.353246	0.243312	0.551705	0.470582	0.0846512	0.265337	0.0265088
ENSSSCG00000033359	CUEDC2	61.9311	77.0451	69.7194	75.9869	51.1943	59.1826	74.542	85.5728	47.5684	50.6744	69.4352	69.2639	70.7709	69.8729	54.9686
ENSSSCG00000015455	CUL1	47.7785	27.5164	39.6822	27.2714	56.4573	43.8084	43.2905	32.4959	61.8498	52.6498	63.1498	55.9179	40.5251	46.0406	70.913
ENSSSCG00000011104	CUL2	39.3576	18.6252	38.8249	28.0255	35.3966	38.7537	22.7621	22.7111	33.819	34.4363	38.5219	48.6761	25.4862	26.5009	29.3288
ENSSSCG00000016234	CUL3	73.1422	34.0434	89.8433	49.7305	103.374	91.939	70.2998	54.4331	71.6735	76.5172	74.0833	84.1344	38.8726	46.019	68.9047
ENSSSCG00000009556	CUL4A	23.9439	17.1591	25.7519	14.8869	27.2027	30.2595	27.8497	18.4033	32.7514	30.3329	27.6264	27.8089	25.1358	28.5219	28.5772
ENSSSCG00000029478	CUL4B	28.096	20.9832	26.2617	28.0616	36.7499	31.212	26.4898	22.7292	43.9922	29.2491	40.2948	34.5852	38.4258	28.1735	46.4341
ENSSSCG00000029198	CUL5	15.1779	10.2594	16.4849	14.6829	16.2094	17.5141	13.2503	11.0379	15.1354	20.5827	21.0057	32.1368	15.532	18.0034	18.1871
ENSSSCG00000001657	CUL7	1.35483	1.32759	1.67303	0.994736	2.38225	3.11261	2.7558	2.53674	1.18904	1.43306	3.52584	4.80788	1.58034	1.71901	0.957401
ENSSSCG00000030196	CUL9	11.8629	3.74993	15.38	5.60218	8.47411	12.1907	8.03806	5.29368	8.59281	11.0468	9.95755	15.9197	5.85982	7.7606	5.45567
ENSSSCG00000001512	CUTA	73.4275	90.1881	93.6412	101.165	119.712	101.405	138.448	121.527	113.538	112.765	99.2782	93.2341	61.3965	59.9576	72.1718
ENSSSCG00000010542	CUTC	13.0003	22.7287	17.6584	26.0389	14.0335	14.6332	15.8537	16.5816	14.1301	16.335	16.2749	14.453	11.05	11.997	16.8128
ENSSSCG00000007681	CUX1	14.1849	13.1637	11.117	5.55046	24.3854	20.1216	24.708	22.2615	17.9948	14.0318	35.5641	27.9778	41.4265	42.5918	34.9936
ENSSSCG00000009831	CUX2	1.70043	1.5517	0.604476	0.279855	0.0310095	0.125534	0.0965014	0.0992894	0.0441248	0.0315698	7.4171	21.079	0.0345069	0.0231966	3.80578
ENSSSCG00000014961	CWC15	42.961	70.8356	43.3748	71.267	44.6089	49.8203	44.1038	49.3791	43.3832	54.6081	41.6655	34.7098	53.7324	45.4945	46.5849
ENSSSCG00000016008	CWC22	17.3693	9.36066	20.2137	12.9616	19.7839	18.8888	14.7895	11.3359	19.629	20.722	26.3519	27.3233	20.1046	18.6766	23.6829
ENSSSCG00000021478	CWC25	12.9064	12.4013	14.2129	10.8057	16.0576	17.7717	16.8327	11.8667	17.8017	15.6792	21.3198	20.0989	13.0534	10.2874	17.713
ENSSSCG00000016942	CWC27	17.4675	17.4201	16.2242	18.9177	23.8661	19.2789	18.9587	14.7163	20.317	24.8633	26.735	24.7931	16.7106	17.7047	21.6466
ENSSSCG00000010550	CWF19L1	9.91196	7.43405	10.6338	9.1621	15.599	10.6697	12.8364	11.0776	13.0768	15.2864	12.0817	10.3455	9.9807	12.3296	9.92916
ENSSSCG00000028201	CWF19L2	17.658	15.6359	15.7568	14.4964	27.2567	20.6369	24.2096	17.1174	24.6464	20.6459	30.1656	24.2705	22.9217	19.2261	24.7982
ENSSSCG00000024024	CX3CR1	1.07159	0.172834	0.024575	0.00916371	0.315831	0.173334	12.69	8.44515	6.23041	3.8678	0.223725	0.00498369	7.40255	9.2886	287.587
ENSSSCG00000032474	CXCL10	0.409798	0.351584	1.03525	1.7946	0.931092	1.29773	0.600843	0.49891	1.20946	1.99775	0.642765	1.6142	3.6623	5.2642	0.466331
ENSSSCG00000012402	CXCR3	2.89926	9.14978	2.57422	7.06878	5.63828	3.52621	19.0435	15.3987	38.3007	17.2359	1.15558	0.852731	2.66039	1.81475	3.29653
ENSSSCG00000039416	CXCR4	15.0721	23.4606	35.896	52.5789	19.2414	61.5397	46.429	58.8404	20.0706	48.4798	25.8572	94.0128	11.1731	7.55519	30.7618
ENSSSCG00000015098	CXCR5	27.2156	14.7438	51.8766	32.7095	2.34207	1.73005	2.83402	2.65516	14.0366	7.00057	0.404023	0.329445	0.706709	0.254817	2.21642
ENSSSCG00000011318	CXCR6	0.0860659	0.0603224	0.124117	0.160774	0.405114	0.174894	2.4925	1.68229	1.41478	0.498475	0.431122	0.189827	0.00154798	0.0599812	0.98672
ENSSSCG00000012201	CXorf21	11.7186	15.1521	17.5774	25.1777	0.00387933	0.252838	0.269133	0.275575	0.118816	0.026965	0.0387448	0.0390612	29.3607	27.4354	2.34683
ENSSSCG00000012249	CXorf38	16.3696	28.1821	17.3623	25.6833	29.6918	21.7065	25.4698	26.1824	32.3414	31.4814	32.1849	26.6521	18.1316	13.2906	24.6933
ENSSSCG00000012622	CXorf56	6.76479	19.6592	6.67644	17.8167	9.69549	12.1669	10.289	18.5387	10.0269	11.2926	10.3596	7.72669	10.181	10.7918	8.13653
ENSSSCG00000004517	CXXC1	25.7117	16.4822	22.7946	17.0648	17.0105	19.6873	14.4521	14.3258	15.6172	15.1948	16.9535	19.8551	10.9791	10.325	21.5237
ENSSSCG00000037898	CXXC5	79.46	37.7867	54.239	41.1301	1.27277	1.55192	17.9665	17.6025	0.74151	0.951028	3.321	2.99281	10.8496	3.56426	85.0318
ENSSSCG00000013086	CYB561A3	225.651	114.741	323.468	229.052	17.9757	15.5163	18.4207	16.754	17.1026	11.5685	19.7094	14.1968	31.6902	25.9405	26.6925
ENSSSCG00000006827	CYB561D1	5.18796	6.55012	8.32402	5.38473	6.74892	7.38589	4.12725	4.9097	8.25212	8.15191	6.50164	9.07032	7.77122	7.67291	3.30411
ENSSSCG00000011410	CYB561D2	15.1983	60.6192	10.898	47.7235	20.156	21.927	33.1325	42.1264	33.6755	31.4031	30.5915	19.9105	38.6542	27.4704	36.2995
ENSSSCG00000004875	CYB5A	23.1483	59.2801	23.7833	40.2143	42.2263	50.6204	31.5202	47.9941	35.1669	35.4196	43.9014	56.7505	56.0676	34.8509	48.7353
ENSSSCG00000033944	CYB5B	41.9948	98.5894	40.093	92.0091	41.9946	39.6088	38.565	47.2365	56.9512	44.3567	54.4899	37.3408	41.954	35.7925	38.5749
ENSSSCG00000017876	CYB5D2	4.47362	5.65635	3.88969	4.13309	5.81391	4.75835	4.6362	6.13869	3.90566	4.50334	4.1087	3.13875	3.31048	4.22418	3.52595
ENSSSCG00000010929	CYB5R1	1.32377	1.66523	1.62141	2.0828	1.81937	1.94994	1.63809	2.19504	0.91134	0.526527	1.38499	1.077	4.00486	4.82886	1.16629
ENSSSCG00000000038	CYB5R3	23.6787	36.4722	18.557	14.7275	24.8099	20.464	21.4314	23.028	29.6096	21.8923	60.3368	45.0441	64.6243	62.2286	36.8124
ENSSSCG00000022994	CYB5R4	19.2709	19.1329	18.1823	29.9806	11.3063	11.1216	10.9386	13.877	13.7032	12.0219	13.4636	12.1214	44.5731	37.4589	16.0829
ENSSSCG00000031493	CYBA	271.888	349.891	243.402	319.929	124.545	137.473	156.26	220.275	169.096	145.569	181.266	171.213	958.091	795.008	164.551
ENSSSCG00000017127	CYBC1	64.2183	45.3827	78.0733	45.8886	44.8331	52.2105	45.3562	40.2558	44.6048	48.2382	44.0952	54.0645	61.1065	62.7123	46.323
ENSSSCG00000025049	CYBRD1	13.0176	6.53132	1.63974	2.79838	41.6627	34.1154	15.0375	15.8038	28.9666	18.0839	2.26475	1.24231	227.636	164.095	43.2137
ENSSSCG00000031918	CYC1	124.033	131.692	93.8056	116.526	79.4598	85.4426	95.6229	91.6015	85.6039	81.7422	85.5658	90.9312	138.32	131.276	112.306
ENSSSCG00000017054	CYFIP2	92.6021	50.797	99.8728	49.4237	89.2568	69.4076	70.3612	46.429	122.445	86.082	113.438	86.8831	13.6439	8.74041	109.186
ENSSSCG00000027076	CYHR1	26.5773	25.4906	24.2005	19.5612	38.109	44.6941	44.3904	40.3661	39.6143	44.7075	37.1758	39.2548	25.2538	23.1852	31.3695
ENSSSCG00000040286	CYLD	29.122	25.3392	45.1488	36.9451	43.6872	44.9297	26.8526	23.6193	50.9609	54.4416	32.0491	40.3415	27.202	30.6643	32.7241
ENSSSCG00000016118	CYP20A1	3.83102	9.39898	4.21874	6.01618	3.58159	5.01121	2.06116	2.45043	4.471	5.65315	5.75406	9.27608	9.88801	10.8438	8.85077
ENSSSCG00000028637	CYP27B1	0.841475	0.13504	1.1318	0.684497	0.596159	1.43356	0.557689	0.254124	0.572356	0.985038	0.28489	0.75786	0.594315	1.75954	0.299987
ENSSSCG00000003825	CYP2J34	0.752765	4.05155	0.163138	0.806527	5.30878	6.81867	7.36337	7.62553	7.96296	9.83368	5.13466	5.81273	2.52329	1.67302	12.0617
ENSSSCG00000013389	CYP2R1	2.7121	3.61872	4.20072	7.43681	2.49458	2.58334	2.07234	3.07847	4.12531	3.57695	1.40532	1.83357	3.73257	2.53429	1.38022
ENSSSCG00000032803	CYP2S1	4.97439	4.72153	1.52858	2.65655	0.528252	0.351206	0.0629635	0.0545178	0.747489	0.517519	0.512591	0.258424	17.1673	25.6513	0.284174
ENSSSCG00000009151	CYP2U1	7.99943	6.9293	9.06027	9.0519	16.2068	14.3503	11.4733	11.3106	19.0775	17.6539	21.3479	18.5148	6.98918	8.03241	12.3027
ENSSSCG00000001718	CYP39A1	1.84339	2.32424	0.931826	1.19949	5.49654	4.07811	2.26712	3.16123	4.18287	3.8704	3.87826	2.2695	4.99248	3.05373	2.4953
ENSSSCG00000023320	CYP3A29	3.35584	2.83188	0.948553	0.624361	0.581989	0.370744	0.691493	0.659424	0.642055	0.550584	0.55603	0.891104	1.79077	7.95999	0.370864
ENSSSCG00000023320	CYP3A29	3.35584	2.83188	0.948553	0.624361	0.581989	0.370744	0.691493	0.659424	0.642055	0.550584	0.55603	0.891104	1.79077	7.95999	0.370864
ENSSSCG00000023320	CYP3A29	3.35584	2.83188	0.948553	0.624361	0.581989	0.370744	0.691493	0.659424	0.642055	0.550584	0.55603	0.891104	1.79077	7.95999	0.370864
ENSSSCG00000023320	CYP3A29	3.35584	2.83188	0.948553	0.624361	0.581989	0.370744	0.691493	0.659424	0.642055	0.550584	0.55603	0.891104	1.79077	7.95999	0.370864
ENSSSCG00000023320	CYP3A29	3.35584	2.83188	0.948553	0.624361	0.581989	0.370744	0.691493	0.659424	0.642055	0.550584	0.55603	0.891104	1.79077	7.95999	0.370864
[truncated: 10,263 more rows]
