# Supplementary material for: Reference transcriptomes of porcine peripheral immune cells created through bulk and single-cell RNA sequencing
Source: bioRxiv preprint, doi:10.1101/2021.04.02.438107, version 1 (2021-04-04)
Supplement: SuppFile02 [file 438107_file10.xlsx]

## Sheet: Enriched genes
Supplementary File 2. Enriched genes in sorted porcine immune cells
EnsemblID	Symbol	log2FoldChange	Cell Type	baseMean	lfcSE	stat	pvalue	padj	Description
ENSSSCG00000033046	ENSSSCG00000033046	16.2597	CD21nB	102.933	4.23275	3.60516	0.000311966	0.00257718
ENSSSCG00000034766	ENSSSCG00000034766	9.74427	CD21nB	7307.2	0.563211	15.5258	2.32253e-54	1.28668e-51
ENSSSCG00000033046	ENSSSCG00000033046	15.9546	CD21pB	102.933	4.23281	3.53301	0.000410853	0.00284981
ENSSSCG00000036462	ENSSSCG00000036462	15.8813	CD21pB	68.8	3.9689	3.74948	0.0001772	0.0013698
ENSSSCG00000029414	ENSSSCG00000029414	13.1129	Myeloid	6357.4	1.42437	8.50407	1.83063e-17	2.65556e-16	ficolin-1 precursor [Source:RefSeq peptide;Acc:NP_999325]
ENSSSCG00000031085	ENSSSCG00000031085	12.5908	SWC6gdT	4267.07	1.41472	8.19302	2.54758e-16	2.26249e-14
ENSSSCG00000004728	CAPN3	12.49	Myeloid	776.333	2.25637	5.09223	3.53874e-07	2.16682e-06	calpain 3 [Source:HGNC Symbol;Acc:HGNC:148]
ENSSSCG00000039798	SLC11A1	12.3879	Myeloid	855.467	2.38282	4.77916	1.76025e-06	9.85978e-06	natural resistance-associated macrophage protein 1 [Source:RefSeq peptide;Acc:NP_998986]
ENSSSCG00000024136	AMPH	12.2381	NK	484.667	2.76193	4.06892	4.72318e-05	0.000666054	amphiphysin [Source:RefSeq peptide;Acc:NP_1231132]
ENSSSCG00000033146	CD163	12.222	Myeloid	2548	0.638929	17.5638	4.66414e-69	7.23501e-67	scavenger receptor cysteine-rich type 1 protein M13 precursor [Source:RefSeq peptide;Acc:NP_999141]
ENSSSCG00000034914	ENSSSCG00000034914	12.2078	SWC6gdT	6680.13	1.28297	8.73585	2.41839e-18	2.87097e-16	scavenger receptor cysteine-rich type 1 protein M16 precursor [Source:RefSeq peptide;Acc:NP_1116565]
ENSSSCG00000007964	ENSSSCG00000007964	12.2039	Myeloid	212.333	4.23577	2.64507	0.00816742	0.025058
ENSSSCG00000015477	CHIT1	12.126	Myeloid	185.067	4.23571	2.62672	0.00862118	0.0262562	chitinase 1 [Source:HGNC Symbol;Acc:HGNC:1936]
ENSSSCG00000033183	ENSSSCG00000033183	12.1225	Myeloid	155.267	4.23966	2.62345	0.0087045	0.0264892
ENSSSCG00000029990	DEFB1	11.9013	Myeloid	117.067	4.23997	2.57107	0.0101385	0.0304674	beta-defensin 1 precursor [Source:RefSeq peptide;Acc:NP_99967]
ENSSSCG00000038806	AXL	11.8487	Myeloid	155.733	4.2349	2.56173	0.0104151	0.0311963	tyrosine-protein kinase receptor UFO precursor [Source:RefSeq peptide;Acc:NP_112193]
ENSSSCG00000001422	C2	11.822	Myeloid	1262.47	1.41192	7.66474	1.79187e-14	2.14031e-13	complement C2 precursor [Source:RefSeq peptide;Acc:NP_195285]
ENSSSCG00000037425	NFAM1	11.7294	Myeloid	418.667	1.76793	6.06892	1.28772e-09	1.02542e-08	NFAT activating protein with ITAM motif 1 [Source:HGNC Symbol;Acc:HGNC:29872]
ENSSSCG00000029371	C5AR1	11.6976	Myeloid	1992.2	0.67026	15.9604	2.41146e-57	2.46095e-55	C5a anaphylatoxin chemotactic receptor 1 [Source:RefSeq peptide;Acc:NP_1231144]
ENSSSCG00000039162	ENSSSCG00000039162	11.6395	SWC6gdT	808.8	2.38769	4.456	8.35027e-06	8.25378e-05
ENSSSCG00000004180	ENSSSCG00000004180	11.6342	Myeloid	180.333	4.23241	2.51258	0.0119854	0.0354984
ENSSSCG00000038667	ENSSSCG00000038667	11.5729	SWC6gdT	2330.4	1.94878	5.42543	5.78168e-08	1.0643e-06
ENSSSCG00000034722	CCL14	11.5578	Myeloid	240.933	4.23232	2.49458	0.0126108	0.0371992	C-C motif chemokine 14 precursor [Source:RefSeq peptide;Acc:NP_124374]
ENSSSCG00000036418	SLC8A1	11.5515	Myeloid	438.067	1.74086	6.06108	1.35212e-09	1.07376e-08	solute carrier family 8 member A1 [Source:HGNC Symbol;Acc:HGNC:1168]
ENSSSCG00000006588	S1A9	11.5371	Myeloid	408.133	1.67028	6.30854	2.81671e-10	2.36604e-09	RNA-binding region containing protein 2-like [Source:RefSeq peptide;Acc:NP_1171377]
ENSSSCG00000000660	A2M	11.5004	Myeloid	1933.67	0.480745	21.842	9.25874e-106	6.33624e-103	alpha-2-macroglobulin [Source:HGNC Symbol;Acc:HGNC:7]
ENSSSCG00000004597	AQP9	11.454	Myeloid	141.333	3.95457	2.64351	0.00820516	0.0251472	aquaporin-9 [Source:RefSeq peptide;Acc:NP_116154]
ENSSSCG00000000232	ACVRL1	11.4399	Myeloid	1903.93	1.45349	7.18263	6.83805e-13	7.23217e-12	activin A receptor like type 1 [Source:HGNC Symbol;Acc:HGNC:175]
ENSSSCG00000006590	S100A8	11.4069	Myeloid	178.667	4.23253	2.45878	0.0139409	0.04071	protein S1-A8 [Source:RefSeq peptide;Acc:NP_1153743]
ENSSSCG00000014441	CSF1R	11.3424	Myeloid	7824.27	0.854436	12.1044	1.00085e-33	3.60491e-32	colony stimulating factor 1 receptor [Source:HGNC Symbol;Acc:HGNC:2433]
ENSSSCG00000007181	ENSSSCG00000007181	11.1899	Myeloid	125.333	4.23441	2.40644	0.0161088	0.0463541
ENSSSCG00000039373	SNX24	11.159	Myeloid	290.2	0.862207	11.7826	4.79877e-32	1.60428e-30	sorting nexin 24 [Source:HGNC Symbol;Acc:HGNC:21533]
ENSSSCG00000034506	MS4A2	11.0903	Myeloid	7160.8	0.542567	18.5973	3.37872e-77	7.14691e-75	high affinity immunoglobulin epsilon receptor subunit beta [Source:RefSeq peptide;Acc:NP_999257]
ENSSSCG00000040967	NACC2	11.0746	Myeloid	448.533	1.49227	6.75122	1.46608e-11	1.39807e-10	NACC family member 2 [Source:HGNC Symbol;Acc:HGNC:23846]
ENSSSCG00000028331	IL1R2	11.0196	Myeloid	129.933	2.23404	4.48497	7.29239e-06	3.76063e-05	interleukin-1 receptor type 2 precursor [Source:RefSeq peptide;Acc:NP_123292]
ENSSSCG00000015335	DYNC1I1	10.9773	Myeloid	176.8	3.96536	2.51613	0.0118652	0.0352141	dynein cytoplasmic 1 intermediate chain 1 [Source:HGNC Symbol;Acc:HGNC:2963]
ENSSSCG00000020967	ENSSSCG00000020967	10.939	Myeloid	118.067	4.2356	2.34653	0.0189491	0.0537298
ENSSSCG00000030638	ENSSSCG00000030638	10.9325	Myeloid	186	3.09324	3.21104	0.00132256	0.00476367
ENSSSCG00000007186	ENSSSCG00000007186	10.9269	Myeloid	90.2	4.23588	2.34352	0.0191025	0.0541385
ENSSSCG00000013181	SERPING1	10.9105	Myeloid	451.533	1.45108	6.82975	8.50643e-12	8.22642e-11	plasma protease C1 inhibitor precursor [Source:RefSeq peptide;Acc:NP_1116666]
ENSSSCG00000027967	IGSF6	10.9009	Myeloid	786.333	0.727406	13.6113	3.43109e-42	1.7741e-40	immunoglobulin superfamily member 6 [Source:RefSeq peptide;Acc:NP_123316]
ENSSSCG00000015476	CHI3L1	10.8908	Myeloid	856.133	0.675754	14.6367	1.63819e-48	1.09532e-46	chitinase-3-like protein 1 precursor [Source:RefSeq peptide;Acc:NP_1154]
ENSSSCG00000000639	ENSSSCG00000000639	10.8543	NK	123.2	5.91246	1.6667	0.095574	0.328238
ENSSSCG00000000864	CHPT1	10.8487	Myeloid	1530.53	0.6711	14.6755	9.25292e-49	6.29523e-47	choline phosphotransferase 1 [Source:HGNC Symbol;Acc:HGNC:17852]
ENSSSCG00000016599	GPR37	10.8362	NK	839.467	0.675617	14.5588	5.13405e-48	1.19459e-44	G protein-coupled receptor 37 [Source:HGNC Symbol;Acc:HGNC:4494]
ENSSSCG00000017220	OTOP3	10.8293	NK	84.1333	1.64014	5.99295	2.06073e-09	7.93859e-08	otopetrin 3 [Source:HGNC Symbol;Acc:HGNC:19658]
ENSSSCG00000033203	ENSSSCG00000033203	10.8273	SWC6gdT	744.267	1.56015	6.29891	2.99738e-10	8.80593e-09
ENSSSCG00000040529	ENSSSCG00000040529	10.7805	SWC6gdT	980.8	1.43935	6.7951	1.08236e-11	4.19739e-10
ENSSSCG00000032251	MAFB	10.7081	Myeloid	302.467	2.45969	3.94687	7.91781e-05	0.000351721	MAF bZIP transcription factor B [Source:HGNC Symbol;Acc:HGNC:648]
ENSSSCG00000006197	SULF1	10.6924	Myeloid	904.333	1.08478	8.93494	4.07417e-19	6.59233e-18	sulfatase 1 [Source:HGNC Symbol;Acc:HGNC:2391]
ENSSSCG00000027443	MRAS	10.6759	Myeloid	223.533	0.680476	14.2194	6.94919e-46	4.1039e-44	muscle RAS oncogene homolog [Source:HGNC Symbol;Acc:HGNC:7227]
ENSSSCG00000015403	HGF	10.644	Myeloid	96.4667	4.23317	2.27819	0.0227151	0.0635259	hepatocyte growth factor [Source:HGNC Symbol;Acc:HGNC:4893]
ENSSSCG00000017256	ABCA6	10.6299	Myeloid	92.3333	4.23744	2.27257	0.0230521	0.0644062	ATP binding cassette subfamily A member 6 [Source:HGNC Symbol;Acc:HGNC:36]
ENSSSCG00000010665	SHTN1	10.6245	Myeloid	325.267	0.745434	12.9112	3.89156e-38	1.68934e-36	shootin 1 [Source:HGNC Symbol;Acc:HGNC:29319]
ENSSSCG00000032135	ENSSSCG00000032135	10.5734	Myeloid	355.667	0.641508	14.9232	2.32689e-50	1.71336e-48
ENSSSCG00000013415	AZU1	10.5612	Myeloid	46	4.24019	2.2549	0.0241398	0.067107	Azurocidin [Source:UniProtKB/Swiss-Prot;Acc:P815]
ENSSSCG00000007371	HNF4A	10.5541	NK	39.8	3.21168	2.97481	0.00293169	0.0221341	hepatocyte nuclear factor 4-alpha [Source:RefSeq peptide;Acc:NP_13836]
ENSSSCG00000028944	ENSSSCG00000028944	10.5479	Myeloid	783.4	0.564265	16.921	3.15107e-64	4.26274e-62
ENSSSCG00000031150	ENSSSCG00000031150	10.535	SWC6gdT	597.333	1.87467	5.08621	3.65291e-07	5.31224e-06
ENSSSCG00000010332	PLAC9	10.5317	Myeloid	219.933	0.703244	13.5539	7.51107e-42	3.81589e-40	placenta-specific protein 9 precursor [Source:RefSeq peptide;Acc:NP_1177138]
ENSSSCG00000007909	ABAT	10.5112	NK	134.333	2.75531	3.45194	0.000556567	0.00561587	4-aminobutyrate aminotransferase, mitochondrial [Source:UniProtKB/Swiss-Prot;Acc:P8147]
ENSSSCG00000025271	ENSSSCG00000025271	10.4911	Myeloid	721.667	1.1124	8.53209	1.43724e-17	2.1059e-16
ENSSSCG00000015544	ZNF648	10.4596	Myeloid	98.2667	3.91794	2.41442	0.0157602	0.0454634	zinc finger protein 648 [Source:HGNC Symbol;Acc:HGNC:1819]
ENSSSCG00000008228	GNLY	10.4562	NK	32622.9	1.6659	5.67635	1.37602e-08	4.56087e-07	antimicrobial peptide NK-lysin precursor [Source:RefSeq peptide;Acc:NP_1265684]
ENSSSCG00000029323	KCNE3	10.456	Myeloid	205.6	0.852107	11.0973	1.2936e-28	3.57475e-27	potassium voltage-gated channel subfamily E member 3 [Source:RefSeq peptide;Acc:NP_999258]
ENSSSCG00000032162	P2RY13	10.4295	Myeloid	54.5333	4.23839	2.22477	0.0260965	0.0717069	purinergic receptor P2Y13 [Source:HGNC Symbol;Acc:HGNC:4537]
ENSSSCG00000022446	SEL1L3	10.4279	Myeloid	174.8	0.888124	10.6155	2.5241e-26	6.04227e-25	SEL1L family member 3 [Source:HGNC Symbol;Acc:HGNC:2918]
ENSSSCG00000005503	TLR4	10.4115	Myeloid	1617.87	1.25219	7.51606	5.64536e-14	6.44535e-13	toll-like receptor 4 isoform 1 precursor [Source:RefSeq peptide;Acc:NP_11651]
ENSSSCG00000030088	ENSSSCG00000030088	10.4072	Myeloid	1308.6	0.586549	16.0382	6.91096e-58	7.17876e-56
ENSSSCG00000034469	ENSSSCG00000034469	10.406	SWC6gdT	241.8	2.01269	4.67335	2.96333e-06	3.35364e-05
ENSSSCG00000000706	LTBR	10.4032	Myeloid	559.067	0.482175	19.5017	1.06102e-84	3.1651e-82	tumor necrosis factor receptor superfamily member 3 precursor [Source:RefSeq peptide;Acc:NP_1295752]
ENSSSCG00000035171	ENSSSCG00000035171	10.4003	SWC6gdT	557.2	1.47106	6.39018	1.65693e-10	5.15419e-09
ENSSSCG00000031346	CMKLR1	10.395	Myeloid	319.133	0.480706	19.5442	4.62059e-85	1.41463e-82	Chemokine-like receptor 1 [Source:UniProtKB/Swiss-Prot;Acc:B1PHQ8]
ENSSSCG00000017257	ABCA9	10.3683	Myeloid	306.933	1.38648	6.75687	1.41004e-11	1.34794e-10	ATP binding cassette subfamily A member 9 [Source:HGNC Symbol;Acc:HGNC:39]
ENSSSCG00000016174	FN1	10.3439	Myeloid	1188.27	0.512283	18.2397	2.49838e-74	4.61367e-72	fibronectin 1 [Source:HGNC Symbol;Acc:HGNC:3778]
ENSSSCG00000015277	SOX13	10.3224	SWC6gdT	3093.27	1.01671	9.16925	4.76321e-20	7.59112e-18	SRY-box 13 [Source:HGNC Symbol;Acc:HGNC:11192]
ENSSSCG00000032017	ENSSSCG00000032017	10.3147	SWC6gdT	13757.7	0.889744	10.4689	1.20001e-25	3.77321e-23
ENSSSCG00000007644	ENSSSCG00000007644	10.2754	Myeloid	186.533	0.698093	13.2868	2.76197e-40	1.35012e-38
ENSSSCG00000030681	MYBPH	10.2733	Myeloid	110.333	4.22011	2.19741	0.027991	0.0763893	myosin-binding protein H [Source:RefSeq peptide;Acc:NP_128186]
ENSSSCG00000015405	ENSSSCG00000015405	10.2626	Myeloid	547.8	0.796253	11.6328	2.80888e-31	9.05222e-30	platelet glycoprotein 4 [Source:RefSeq peptide;Acc:NP_13887]
ENSSSCG00000026653	ENSSSCG00000026653	10.2621	Myeloid	1892.33	1.00842	9.18481	4.12235e-20	7.07367e-19
ENSSSCG00000026724	PLBD1	10.2559	Myeloid	14930.3	1.17675	7.86559	3.67367e-15	4.61052e-14	phospholipase B-like 1 precursor [Source:RefSeq peptide;Acc:NP_1231558]
ENSSSCG00000000802	NELL2	10.2263	Myeloid	141.6	2.51608	3.66692	0.000245491	0.00100885	neural EGFL like 2 [Source:HGNC Symbol;Acc:HGNC:7751]
ENSSSCG00000037351	ENSSSCG00000037351	10.2093	Myeloid	93.4667	3.79332	2.42776	0.0151924	0.0439454
ENSSSCG00000012633	IL13RA1	10.206	Myeloid	2360.13	0.570532	16.1358	1.43027e-58	1.55512e-56	interleukin-13 receptor subunit alpha-1 precursor [Source:RefSeq peptide;Acc:NP_99956]
ENSSSCG00000013079	DAGLA	10.1941	Myeloid	116.6	0.834432	11.0184	3.11511e-28	8.46756e-27	diacylglycerol lipase alpha [Source:HGNC Symbol;Acc:HGNC:1165]
ENSSSCG00000028461	ENSSSCG00000028461	10.1751	Myeloid	2997.8	0.884547	10.3727	3.30153e-25	7.57594e-24	tyrosine-protein phosphatase non-receptor type substrate 1 precursor [Source:RefSeq peptide;Acc:NP_11158]
ENSSSCG00000002432	KCNK13	10.1556	Myeloid	37.8667	4.24016	2.15927	0.0308295	0.0832181	potassium channel subfamily K member 13 [Source:RefSeq peptide;Acc:NP_1231525]
ENSSSCG00000011519	GXYLT2	10.1041	Myeloid	84.4	4.23117	2.15168	0.0314229	0.0846041	glucoside xylosyltransferase 2 [Source:HGNC Symbol;Acc:HGNC:33383]
ENSSSCG00000031292	ENSSSCG00000031292	10.0884	Myeloid	33.1333	4.24033	2.14332	0.0320876	0.0861147
ENSSSCG00000006034	RSPO2	10.0432	NK	20.6667	5.46856	1.65367	0.0981948	0.333449	R-spondin-2 precursor [Source:RefSeq peptide;Acc:NP_1287]
ENSSSCG00000026043	TGM3	10.0076	Myeloid	188.533	1.01488	8.87552	6.96047e-19	1.11848e-17	transglutaminase 3 [Source:HGNC Symbol;Acc:HGNC:11779]
ENSSSCG00000013556	ADGRE1	10.004	Myeloid	178	0.779041	11.5578	6.74018e-31	2.13085e-29	adhesion G protein-coupled receptor E1 [Source:HGNC Symbol;Acc:HGNC:3336]
ENSSSCG00000023550	IL1RL2	9.98758	Myeloid	98.4667	2.29899	3.90936	9.25399e-05	0.000406882	interleukin 1 receptor like 2 [Source:HGNC Symbol;Acc:HGNC:5999]
ENSSSCG00000024568	ENSSSCG00000024568	9.96183	Myeloid	48.1333	4.23486	2.1162	0.0343276	0.0914093
ENSSSCG00000039556	KCNQ1	9.95293	Myeloid	246.067	0.825824	10.8412	2.19567e-27	5.61417e-26	potassium voltage-gated channel subfamily Q member 1 [Source:HGNC Symbol;Acc:HGNC:6294]
ENSSSCG00000021075	TDRD1	9.9474	Myeloid	122.6	1.07912	8.29135	1.11966e-16	1.54705e-15	tudor domain containing 1 [Source:HGNC Symbol;Acc:HGNC:11712]
ENSSSCG00000003687	EPB41L3	9.92564	Myeloid	43.5333	4.23693	2.10663	0.0351499	0.0933213	erythrocyte membrane protein band 4.1 like 3 [Source:HGNC Symbol;Acc:HGNC:338]
ENSSSCG00000006040	DPYS	9.91079	Myeloid	45.0667	4.23558	2.10379	0.0353966	0.0938692	dihydropyrimidinase [Source:HGNC Symbol;Acc:HGNC:313]
ENSSSCG00000037466	ENSSSCG00000037466	9.90348	Myeloid	470.667	0.594093	14.9867	8.9715e-51	6.77756e-49
ENSSSCG00000015045	NCAM1	9.90324	Myeloid	79.5333	1.08402	8.21315	2.15465e-16	2.90803e-15	neural cell adhesion molecule 1 [Source:HGNC Symbol;Acc:HGNC:7656]
ENSSSCG00000017389	RAMP2	9.86829	Myeloid	471.8	0.669555	13.2451	4.81909e-40	2.30721e-38	receptor activity-modifying protein 2 precursor [Source:RefSeq peptide;Acc:NP_999247]
ENSSSCG00000015638	RHEX	9.86557	SWC6gdT	19494.5	0.819736	10.8151	2.91815e-27	1.17068e-24	regulator of hemoglobinization and erythroid cell expansion [Source:HGNC Symbol;Acc:HGNC:25341]
ENSSSCG00000015299	STEAP4	9.85604	Myeloid	601.2	0.738196	11.9969	3.69033e-33	1.28929e-31	metalloreductase STEAP4 [Source:RefSeq peptide;Acc:NP_1159961]
ENSSSCG00000013787	ADGRE3	9.84334	Myeloid	259.8	1.52513	5.79842	6.6943e-09	5.00202e-08	adhesion G protein-coupled receptor E3 [Source:HGNC Symbol;Acc:HGNC:23647]
ENSSSCG00000034371	ENSSSCG00000034371	9.8159	Myeloid	27.3333	4.24043	2.07901	0.0376164	0.0989778
ENSSSCG00000014871	TSKU	9.80666	Myeloid	60.6667	4.23211	2.08091	0.0374418	0.0986184	tsukushi, small leucine rich proteoglycan [Source:HGNC Symbol;Acc:HGNC:2885]
ENSSSCG00000022467	VPREB1	9.78278	Myeloid	341.333	1.4536	6.04208	1.52144e-09	1.20084e-08	immunoglobulin iota chain precursor [Source:RefSeq peptide;Acc:NP_168585]
ENSSSCG00000000759	ENSSSCG00000000759	9.77993	Myeloid	288.667	1.85306	4.73808	2.15753e-06	1.19755e-05
ENSSSCG00000000640	ENSSSCG00000000640	9.77743	NK	620.333	0.565059	15.5336	2.05364e-54	1.1946e-50
ENSSSCG00000029570	PXDN	9.76789	Myeloid	63.8667	4.19754	2.08882	0.0367243	0.096948	peroxidasin [Source:HGNC Symbol;Acc:HGNC:14966]
ENSSSCG00000021006	ENSSSCG00000021006	9.62131	CD21nB	7454	0.599128	14.3898	6.00087e-47	2.18169e-44
ENSSSCG00000004284	ENSSSCG00000004284	9.74077	SWC6gdT	59.8	4.23607	2.06341	0.0390735	0.101248
ENSSSCG00000014823	P2RY6	9.71085	Myeloid	79.8667	4.23265	2.05801	0.0395889	0.103384	P2Y purinoceptor 6 [Source:RefSeq peptide;Acc:NP_1231225]
ENSSSCG00000024591	ETV1	9.70961	Myeloid	41.1333	4.23403	2.05705	0.0396816	0.103603	ETS variant 1 [Source:HGNC Symbol;Acc:HGNC:349]
ENSSSCG00000037475	ENSSSCG00000037475	9.69653	SWC6gdT	969.2	0.556266	15.6338	4.28696e-55	9.97489e-52
ENSSSCG00000038392	ENSSSCG00000038392	9.68856	SWC6gdT	2195.6	1.00136	8.67676	4.07197e-18	4.64444e-16
ENSSSCG00000039651	SLC2A5	9.68331	Myeloid	44.4667	4.23314	2.05127	0.0402408	0.104851	solute carrier family 2 member 5 [Source:HGNC Symbol;Acc:HGNC:111]
ENSSSCG00000003788	PTGER3	9.6832	NK	29.5333	5.91607	1.46773	0.142177	0.432441	prostaglandin E2 receptor EP3 subtype [Source:RefSeq peptide;Acc:NP_998999]
ENSSSCG00000030655	MAMDC2	9.67491	Myeloid	140.267	3.27311	2.65036	0.00804058	0.0247079	MAM domain-containing protein 2 [Source:RefSeq peptide;Acc:NP_1231912]
ENSSSCG00000009230	WDFY3	9.65921	Myeloid	465.867	0.611584	14.1587	1.65131e-45	9.51057e-44	WD repeat and FYVE domain containing 3 [Source:HGNC Symbol;Acc:HGNC:2751]
ENSSSCG00000037583	GNB4	9.65651	Myeloid	522.933	0.623394	13.8861	7.69176e-44	4.24104e-42	G protein subunit beta 4 [Source:HGNC Symbol;Acc:HGNC:2731]
ENSSSCG00000036751	PPM1H	9.65299	Myeloid	314.667	0.651432	13.283	2.90433e-40	1.41376e-38	protein phosphatase, Mg2+/Mn2+ dependent 1H [Source:HGNC Symbol;Acc:HGNC:18583]
ENSSSCG00000015406	GNAT3	9.65223	Myeloid	53.6	4.23558	2.04275	0.041077	0.106863	G protein subunit alpha transducin 3 [Source:HGNC Symbol;Acc:HGNC:228]
ENSSSCG00000017237	ENSSSCG00000017237	9.64108	Myeloid	85.8667	0.855486	10.1008	5.48028e-24	1.1807e-22
ENSSSCG00000038844	SMIM5	9.6403	Myeloid	110.667	0.995768	8.67702	4.06285e-18	6.17065e-17	small integral membrane protein 5 [Source:HGNC Symbol;Acc:HGNC:43]
ENSSSCG00000021259	CDA	9.63443	Myeloid	152	1.10466	7.81635	5.43778e-15	6.72297e-14	cytidine deaminase [Source:RefSeq peptide;Acc:NP_1231314]
ENSSSCG00000007695	ENSSSCG00000007695	9.629	CD21pB	76.8	4.22889	2.04049	0.0413016	0.132479
ENSSSCG00000036203	ENSSSCG00000036203	9.60552	CD21nB	1800.53	1.01961	8.43997	3.17419e-17	1.75017e-15
ENSSSCG00000038138	TFEC	9.61694	Myeloid	212.933	0.621848	13.857	1.15433e-43	6.30491e-42	transcription factor EC [Source:HGNC Symbol;Acc:HGNC:11754]
ENSSSCG00000033417	ENSSSCG00000033417	9.50932	CD21nB	1593.07	1.15452	7.37044	1.70071e-13	6.84638e-12
ENSSSCG00000003251	NLRP12	9.6045	Myeloid	198.4	0.899786	9.56283	1.14583e-21	2.14575e-20	NLR family pyrin domain containing 12 [Source:HGNC Symbol;Acc:HGNC:22938]
ENSSSCG00000035195	HNMT	9.5915	Myeloid	1560.87	0.32985	26.0467	1.46741e-149	3.41436e-146	histamine N-methyltransferase [Source:RefSeq peptide;Acc:NP_123149]
ENSSSCG00000002779	LRRC36	9.57906	Myeloid	25	4.24039	2.02318	0.0430549	0.11146	leucine rich repeat containing 36 [Source:HGNC Symbol;Acc:HGNC:25615]
ENSSSCG00000008769	ENSSSCG00000008769	9.57103	Myeloid	74.0667	0.837029	10.2398	1.3148e-24	2.90255e-23
ENSSSCG00000004179	VNN2	9.55668	Myeloid	152.533	0.613895	13.9383	3.70519e-44	2.06249e-42	vanin 2 [Source:HGNC Symbol;Acc:HGNC:1276]
ENSSSCG00000024429	SIDT1	9.5482	SWC6gdT	504.467	1.22415	6.98294	2.89063e-12	1.30347e-10	SID1 transmembrane family member 1 [Source:HGNC Symbol;Acc:HGNC:25967]
ENSSSCG00000000648	CLEC7A	9.53959	Myeloid	138.6	0.751256	11.3671	6.09917e-30	1.84786e-28	C-type lectin domain family 7 member A [Source:RefSeq peptide;Acc:NP_1139338]
ENSSSCG00000027665	ENSSSCG00000027665	9.51607	Myeloid	1145.67	0.574628	14.8201	1.08558e-49	7.74825e-48
ENSSSCG00000037141	ENSSSCG00000037141	9.49477	CD21nB	7474.6	0.856752	9.91509	3.57918e-23	2.87174e-21
ENSSSCG00000006002	CCN3	9.45425	CD21nB	31.3333	4.23678	1.99544	0.0459947	0.156325	nephroblastoma overexpressed [Source:HGNC Symbol;Acc:HGNC:7885]
ENSSSCG00000023975	CCDC9B	9.4894	Myeloid	24.2	4.24016	2.00214	0.0452693	0.116493	coiled-coil domain containing 9B [Source:HGNC Symbol;Acc:HGNC:33488]
ENSSSCG00000026473	ABCA8	9.48751	Myeloid	24.1333	4.24057	2.0015	0.0453382	0.116618	ATP binding cassette subfamily A member 8 [Source:HGNC Symbol;Acc:HGNC:38]
ENSSSCG00000039573	SLPI	9.4824	Myeloid	84.7333	1.00868	8.4094	4.12128e-17	5.84719e-16	antileukoproteinase [Source:RefSeq peptide;Acc:NP_99935]
ENSSSCG00000039217	ENSSSCG00000039217	9.47364	SWC6gdT	2921.53	1.04319	8.12281	4.55499e-16	3.86808e-14
ENSSSCG00000014316	TGFBI	9.46764	Myeloid	4072.13	1.2672	6.68215	2.35457e-11	2.20378e-10	transforming growth factor beta induced [Source:HGNC Symbol;Acc:HGNC:11771]
ENSSSCG00000005953	KCNQ3	9.46547	Myeloid	33	4.23354	1.99962	0.0455413	0.117037	potassium voltage-gated channel subfamily Q member 3 [Source:HGNC Symbol;Acc:HGNC:6297]
ENSSSCG00000011038	MRC1	9.45449	Myeloid	50.4667	3.06529	2.75814	0.00581313	0.0183977	macrophage mannose receptor 1 precursor [Source:RefSeq peptide;Acc:NP_1242898]
ENSSSCG00000036318	ENSSSCG00000036318	9.42665	CD21nB	1464.53	2.0855	4.0406	5.3315e-05	0.000552822
ENSSSCG00000021606	FLVCR2	9.451	Myeloid	269	0.636581	13.2756	3.20691e-40	1.55455e-38	feline leukemia virus subgroup C receptor-related protein 2 [Source:RefSeq peptide;Acc:NP_1136312]
ENSSSCG00000034284	ENSSSCG00000034284	9.4351	Myeloid	780.2	1.12755	7.48091	7.38071e-14	8.37729e-13
ENSSSCG00000037009	ENSSSCG00000037009	9.36743	CD21nB	3982.2	0.618536	13.5278	1.07198e-41	2.54519e-39
ENSSSCG00000004283	DPPA5	9.42621	SWC6gdT	50.4667	4.2361	1.98915	0.0466851	0.117131	developmental pluripotency-associated 5 protein [Source:RefSeq peptide;Acc:NP_1153745]
ENSSSCG00000008954	ENSSSCG00000008954	9.41032	Myeloid	20.9333	4.24062	1.98328	0.0473366	0.121142
ENSSSCG00000007185	SIRPB2	9.39425	Myeloid	265.533	0.443614	18.9224	7.45446e-80	1.84522e-77	signal regulatory protein beta 2 [Source:HGNC Symbol;Acc:HGNC:16247]
ENSSSCG00000029968	ASIC4	9.389	SWC6gdT	162.6	0.954787	8.78625	1.54635e-18	1.91385e-16	acid sensing ion channel subunit family member 4 [Source:HGNC Symbol;Acc:HGNC:21263]
ENSSSCG00000016690	CREB5	9.37872	Myeloid	24.2	4.23803	1.97703	0.0480382	0.122641	cAMP responsive element binding protein 5 [Source:HGNC Symbol;Acc:HGNC:16844]
ENSSSCG00000036983	ENSSSCG00000036983	9.30984	CD21nB	4394.6	0.989904	8.3946	4.67492e-17	2.52968e-15
ENSSSCG00000004663	SEMA6D	9.33471	NK	916.067	0.91794	9.0798	1.08778e-19	2.10921e-17	semaphorin 6D [Source:HGNC Symbol;Acc:HGNC:1677]
ENSSSCG00000007456	SULF2	9.32925	Myeloid	86.9333	0.965079	8.63065	6.10068e-18	9.1463e-17	sulfatase 2 [Source:HGNC Symbol;Acc:HGNC:2392]
ENSSSCG00000009169	SLC39A8	9.32818	Myeloid	529.067	0.557729	14.9323	2.03097e-50	1.50499e-48	solute carrier family 39 member 8 [Source:HGNC Symbol;Acc:HGNC:2862]
ENSSSCG00000007056	PLCB1	9.31776	Myeloid	34.3333	4.23621	1.96349	0.0495893	0.126076	phospholipase C beta 1 [Source:HGNC Symbol;Acc:HGNC:15917]
ENSSSCG00000005055	LGALS3	9.31647	Myeloid	697.533	0.567864	14.6452	1.44614e-48	9.72508e-47	galectin-3 [Source:RefSeq peptide;Acc:NP_1997]
ENSSSCG00000034087	TNFSF15	9.31391	Myeloid	34.8667	4.11448	2.02065	0.0433163	0.112037	tumor necrosis factor ligand superfamily member 15 [Source:RefSeq peptide;Acc:NP_1231484]
ENSSSCG00000033225	ENSSSCG00000033225	9.26585	CD21nB	863	1.52075	5.43539	5.46778e-08	1.09299e-06
ENSSSCG00000009601	SLC18A1	9.28603	Myeloid	79.4667	1.22927	6.7406	1.57733e-11	1.49801e-10	solute carrier family 18 member A1 [Source:HGNC Symbol;Acc:HGNC:1934]
ENSSSCG00000005472	SLC46A2	9.28068	Myeloid	468.133	0.524171	15.7977	3.22816e-56	3.18274e-54	solute carrier family 46 member 2 [Source:HGNC Symbol;Acc:HGNC:1655]
ENSSSCG00000033640	ENSSSCG00000033640	9.22227	CD21nB	599.6	2.25087	3.65292	0.000259272	0.00219372
ENSSSCG00000008874	TMEM144	9.26092	Myeloid	59.0667	3.78189	2.18434	0.0289374	0.0786032	transmembrane protein 144 [Source:HGNC Symbol;Acc:HGNC:25633]
ENSSSCG00000006781	CTTNBP2NL	9.25782	Myeloid	66.6667	0.978495	8.4393	3.19238e-17	4.56268e-16	CTTNBP2 N-terminal like [Source:HGNC Symbol;Acc:HGNC:2533]
ENSSSCG00000033542	ENSSSCG00000033542	9.24905	Myeloid	358.533	0.562778	14.6578	1.20185e-48	8.12927e-47
ENSSSCG00000034639	ENSSSCG00000034639	9.24269	Myeloid	345.533	0.696284	11.8381	2.47967e-32	8.31369e-31
ENSSSCG00000025795	CSF3R	9.24179	Myeloid	1966	0.661439	12.4604	1.22752e-35	4.80841e-34	colony stimulating factor 3 receptor [Source:HGNC Symbol;Acc:HGNC:2439]
ENSSSCG00000039804	ENSSSCG00000039804	9.16873	CD21nB	2146.53	1.48312	5.50778	3.63379e-08	7.40377e-07
ENSSSCG00000000368	MMP19	9.21683	Myeloid	109.267	0.723552	11.3562	6.90574e-30	2.08138e-28	matrix metallopeptidase 19 [Source:HGNC Symbol;Acc:HGNC:7165]
ENSSSCG00000040615	MALRD1	9.21472	Myeloid	185.867	0.632539	12.9869	1.4518e-38	6.54662e-37	MAM and LDL receptor class A domain containing 1 [Source:HGNC Symbol;Acc:HGNC:24331]
ENSSSCG00000011485	PTPRG	9.20621	NK	51.5333	1.16253	7.05894	1.67772e-12	1.06659e-10	protein tyrosine phosphatase, receptor type G [Source:HGNC Symbol;Acc:HGNC:9671]
ENSSSCG00000008103	MERTK	9.19772	Myeloid	90.4	1.17103	7.00044	2.55166e-12	2.57022e-11	MER proto-oncogene, tyrosine kinase [Source:HGNC Symbol;Acc:HGNC:727]
ENSSSCG00000040465	KLRK1	9.17898	NK	3611.2	1.23653	6.61447	3.72875e-11	1.98992e-09	NKG2-D type II integral membrane protein [Source:RefSeq peptide;Acc:NP_998978]
ENSSSCG00000013144	ENSSSCG00000013144	9.17458	Myeloid	3322.13	1.3189	6.19801	5.71817e-10	4.68158e-09
ENSSSCG00000007700	HIP1	9.16974	Myeloid	336	0.926913	8.81393	1.20838e-18	1.90491e-17	huntingtin interacting protein 1 [Source:HGNC Symbol;Acc:HGNC:4913]
ENSSSCG00000014725	HBB	9.09767	CD21nB	23515.1	1.48715	5.44508	5.17815e-08	1.04046e-06	hemoglobin subunit beta [Source:RefSeq peptide;Acc:NP_1138313]
ENSSSCG00000000492	LYZ	9.16824	Myeloid	4033.13	0.952807	8.57282	1.00982e-17	1.49278e-16	lysozyme C-3 precursor [Source:RefSeq peptide;Acc:NP_999557]
ENSSSCG00000024132	TMEM47	9.1658	Myeloid	81.0667	0.70797	11.5341	8.8813e-31	2.78504e-29	transmembrane protein 47 [Source:HGNC Symbol;Acc:HGNC:18515]
ENSSSCG00000008319	CD207	9.1618	Myeloid	85.4	1.23261	6.62158	3.55382e-11	3.27097e-10	C-type lectin domain family 4 member K [Source:RefSeq peptide;Acc:NP_1123429]
ENSSSCG00000026383	NRP2	9.14694	Myeloid	408.867	0.654646	12.4448	1.49259e-35	5.82711e-34	neuropilin 2 [Source:HGNC Symbol;Acc:HGNC:85]
ENSSSCG00000003479	MFAP2	9.13819	Myeloid	61.0667	1.02615	7.93079	2.17755e-15	2.77476e-14	microfibril associated protein 2 [Source:HGNC Symbol;Acc:HGNC:733]
ENSSSCG00000003795	WLS	9.1366	Myeloid	456.067	0.391369	20.7901	5.31949e-96	2.38027e-93	wntless Wnt ligand secretion mediator [Source:HGNC Symbol;Acc:HGNC:3238]
ENSSSCG00000039300	IL27	9.12816	Myeloid	36.3333	4.06803	1.99806	0.0457101	0.117393	interleukin-27 subunit alpha precursor [Source:RefSeq peptide;Acc:NP_17521]
ENSSSCG00000032444	PLXDC2	9.1185	Myeloid	118.2	0.899259	9.02799	1.74854e-19	2.88546e-18	plexin domain containing 2 [Source:HGNC Symbol;Acc:HGNC:2113]
ENSSSCG00000003272	ENSSSCG00000003272	9.10388	Myeloid	462.867	0.411663	19.6857	2.85984e-86	9.24205e-84
ENSSSCG00000032679	ENSSSCG00000032679	8.96819	CD21nB	1588.87	1.15438	6.90257	5.10702e-12	1.75784e-10
ENSSSCG00000013632	C19orf38	9.09599	Myeloid	790.333	0.423371	19.1227	1.6342e-81	4.32096e-79	chromosome 19 open reading frame 38 [Source:HGNC Symbol;Acc:HGNC:3473]
ENSSSCG00000037360	CST3	9.08152	Myeloid	14779.5	0.488219	16.5531	1.52141e-61	1.84376e-59	cystatin-C precursor [Source:RefSeq peptide;Acc:NP_13867]
ENSSSCG00000004789	THBS1	9.07955	Myeloid	764.867	0.49148	16.4392	1.00207e-60	1.1896e-58	thrombospondin-1 precursor [Source:RefSeq peptide;Acc:NP_1231465]
ENSSSCG00000012637	KLHL13	9.0694	Myeloid	180.133	0.676932	11.9205	9.24964e-33	3.1465e-31	kelch like family member 13 [Source:HGNC Symbol;Acc:HGNC:22931]
ENSSSCG00000006465	INSRR	9.06414	NK	203.2	0.640037	12.5995	2.12511e-36	1.54522e-33	insulin receptor related receptor [Source:HGNC Symbol;Acc:HGNC:693]
ENSSSCG00000010445	ANKRD22	9.05305	Myeloid	35.1333	4.23365	1.90215	0.0571513	0.142499	ankyrin repeat domain 22 [Source:HGNC Symbol;Acc:HGNC:28321]
ENSSSCG00000009300	WASF3	9.04882	Myeloid	27.6	4.23622	1.9	0.0574332	0.143079	WAS protein family member 3 [Source:HGNC Symbol;Acc:HGNC:12734]
ENSSSCG00000022986	CCSER1	9.04118	Myeloid	69.8	0.87637	9.17555	4.49274e-20	7.68655e-19	coiled-coil serine rich protein 1 [Source:HGNC Symbol;Acc:HGNC:29349]
ENSSSCG00000040410	ENSSSCG00000040410	9.03426	NK	294.933	0.673867	11.9226	9.0227e-33	4.77137e-30
ENSSSCG00000023333	FCN2	9.03245	Myeloid	32.5333	4.23426	1.89701	0.0578263	0.143781	ficolin-2 precursor [Source:RefSeq peptide;Acc:NP_99933]
ENSSSCG00000036201	NPR3	9.0187	Myeloid	791.933	0.430544	18.6246	2.03084e-77	4.37532e-75	natriuretic peptide receptor 3 [Source:HGNC Symbol;Acc:HGNC:7945]
ENSSSCG00000024067	KRT23	8.99624	Myeloid	20.3333	3.00111	2.66442	0.00771202	0.0237484	keratin 23 [Source:HGNC Symbol;Acc:HGNC:6438]
ENSSSCG00000008230	ATOH8	8.99497	NK	53	1.23873	6.45415	1.08826e-10	5.36475e-09	atonal bHLH transcription factor 8 [Source:HGNC Symbol;Acc:HGNC:24126]
ENSSSCG00000040381	ENSSSCG00000040381	8.9543	CD21nB	2714.47	0.458244	17.3582	1.70922e-67	1.98851e-64
ENSSSCG00000022236	FOLR1	8.95586	Myeloid	7199.67	0.438205	18.1556	1.15993e-73	2.10853e-71	folate receptor alpha precursor [Source:RefSeq peptide;Acc:NP_999476]
ENSSSCG00000032499	ENSSSCG00000032499	8.91226	CD21nB	180.467	4.13217	1.9148	0.0555184	0.180669
ENSSSCG00000028674	CR2	8.9423	CD21pB	851.133	0.402136	19.7503	7.98013e-87	1.3263e-83	complement C3d receptor 2 [Source:HGNC Symbol;Acc:HGNC:2336]
ENSSSCG00000001618	ENSSSCG00000001618	8.9362	NK	37.2	5.9068	1.34357	0.179088	0.507801
ENSSSCG00000002866	CEBPA	8.92914	Myeloid	164.133	0.611158	12.974	1.71902e-38	7.69196e-37	CCAAT/enhancer binding protein alpha [Source:HGNC Symbol;Acc:HGNC:1833]
ENSSSCG00000040377	FCER2	8.9244	CD21pB	632.867	0.702377	11.2823	1.60548e-29	1.48239e-27	low affinity immunoglobulin epsilon Fc receptor [Source:RefSeq peptide;Acc:NP_1138689]
ENSSSCG00000035483	ENSSSCG00000035483	8.90361	CD21nB	1112.6	0.497643	15.8821	8.43189e-57	5.77039e-54
ENSSSCG00000031282	ENSSSCG00000031282	8.78916	CD21nB	455.533	1.28723	6.0511	1.43863e-09	3.58395e-08
ENSSSCG00000006345	OLFML2B	8.89521	Myeloid	135.133	0.665093	11.8708	1.67778e-32	5.65776e-31	olfactomedin like 2B [Source:HGNC Symbol;Acc:HGNC:24558]
ENSSSCG00000033750	SH2D4A	8.89163	SWC6gdT	140.4	1.02625	7.68977	1.474e-14	9.5802e-13	SH2 domain containing 4A [Source:HGNC Symbol;Acc:HGNC:2612]
ENSSSCG00000009203	SNCA	8.88828	SWC6gdT	16.2667	4.24102	1.86	0.0628861	0.149401	Alpha-synuclein [Source:UniProtKB/Swiss-Prot;Acc:Q3I5G7]
ENSSSCG00000015037	IL18	8.87351	Myeloid	82.0667	1.10586	7.11983	1.08063e-12	1.11951e-11	Interleukin-18 [Source:UniProtKB/Swiss-Prot;Acc:O1973]
ENSSSCG00000002815	ADGRG1	8.87343	NK	13252.3	0.648648	12.1382	6.62491e-34	3.85371e-31	adhesion G-protein coupled receptor G1 precursor [Source:RefSeq peptide;Acc:NP_1229985]
ENSSSCG00000008634	ATP6V1C2	8.86492	CD21pB	97	2.61892	3.00312	0.00267229	0.0140613	ATPase H+ transporting V1 subunit C2 [Source:HGNC Symbol;Acc:HGNC:18264]
ENSSSCG00000024800	DSC3	8.85703	Myeloid	157.2	0.627576	12.5196	5.82923e-36	2.33853e-34	desmocollin 3 [Source:HGNC Symbol;Acc:HGNC:337]
ENSSSCG00000017245	CDC42EP4	8.85305	Myeloid	129	0.761813	10.3084	6.45898e-25	1.45628e-23	CDC42 effector protein 4 [Source:HGNC Symbol;Acc:HGNC:17147]
ENSSSCG00000017170	MGAT5B	8.85068	NK	24.3333	3.26798	2.40231	0.0162921	0.087226	mannosyl (alpha-1,6-)-glycoprotein beta-1,6-N-acetyl-glucosaminyltransferase, isozyme B [Source:HGNC Symbol;Acc:HGNC:2414]
ENSSSCG00000037791	NKD2	8.8416	Myeloid	141.6	0.859734	9.12096	7.44601e-20	1.25365e-18	naked cuticle homolog 2 [Source:HGNC Symbol;Acc:HGNC:1746]
ENSSSCG00000030113	SHISA2	8.83986	CD21pB	204.8	0.566636	13.8358	1.55014e-43	3.92051e-41	shisa family member 2 [Source:HGNC Symbol;Acc:HGNC:2366]
ENSSSCG00000023479	ENSSSCG00000023479	8.83619	Myeloid	141	1.06685	7.34518	2.05476e-13	2.27019e-12
ENSSSCG00000014369	CD14	8.83182	Myeloid	658.533	0.382355	20.4831	3.04576e-93	1.18115e-90	monocyte differentiation antigen CD14 precursor [Source:RefSeq peptide;Acc:NP_19914]
ENSSSCG00000003754	ENSSSCG00000003754	8.82914	NK	335.533	3.95165	1.98124	0.0475649	0.194849
ENSSSCG00000024310	F13A1	8.82268	Myeloid	9371.67	1.03615	7.54973	4.36174e-14	5.04418e-13	coagulation factor XIII A chain [Source:HGNC Symbol;Acc:HGNC:3531]
ENSSSCG00000017222	OTOP2	8.81744	NK	60.1333	1.19642	6.53401	6.40303e-11	3.35553e-09	otopetrin 2 [Source:HGNC Symbol;Acc:HGNC:19657]
ENSSSCG00000006296	ATP1B1	8.80902	Myeloid	329	0.622767	12.5392	4.55342e-36	1.83303e-34	Sodium/potassium-transporting ATPase subunit beta-1 [Source:UniProtKB/Swiss-Prot;Acc:P527]
ENSSSCG00000017705	CCL5	8.80273	NK	18420.5	0.756242	10.3178	5.85697e-25	2.00412e-22	C-C motif chemokine 5 precursor [Source:RefSeq peptide;Acc:NP_1123418]
ENSSSCG00000033457	ENSSSCG00000033457	8.80135	Myeloid	1926.93	0.306011	25.4937	2.3161e-143	3.84936e-140
ENSSSCG00000039102	ENSSSCG00000039102	8.65675	CD21nB	344.867	0.55814	13.7183	7.88572e-43	2.13355e-40
ENSSSCG00000015294	ENSSSCG00000015294	8.77978	CD21pB	850.667	0.375104	20.7403	1.49945e-95	2.90744e-92
ENSSSCG00000024024	CX3CR1	8.77255	NK	1139.4	0.847432	9.17189	4.64792e-20	9.65605e-18	C-X3-C motif chemokine receptor 1 [Source:HGNC Symbol;Acc:HGNC:2558]
ENSSSCG00000003257	CACNG6	8.76672	Myeloid	21.4	4.2369	1.83312	0.0667854	0.162719	calcium voltage-gated channel auxiliary subunit gamma 6 [Source:HGNC Symbol;Acc:HGNC:13625]
ENSSSCG00000009564	TMEM255B	8.76167	CD21pB	156.6	0.681035	11.3969	4.33411e-30	4.27314e-28	transmembrane protein 255B [Source:HGNC Symbol;Acc:HGNC:28297]
ENSSSCG00000008491	QPCT	8.7537	Myeloid	297.267	0.568314	13.6433	2.21183e-42	1.14877e-40	glutaminyl-peptide cyclotransferase [Source:HGNC Symbol;Acc:HGNC:9753]
ENSSSCG00000024351	MET	8.74693	Myeloid	38.2667	4.00003	1.93672	0.05278	0.132833	Hepatocyte growth factor receptor [Source:UniProtKB/Swiss-Prot;Acc:Q2QLE]
ENSSSCG00000032108	SH2D1B	8.74553	NK	327.6	1.04878	7.38525	1.52163e-13	1.14952e-11	SH2 domain containing 1B [Source:HGNC Symbol;Acc:HGNC:3416]
ENSSSCG00000001989	CIDEB	8.74236	Myeloid	179.933	0.987677	7.83896	4.54276e-15	5.64642e-14	cell death activator CIDE-B [Source:RefSeq peptide;Acc:NP_116158]
ENSSSCG00000005617	STXBP1	8.73808	Myeloid	111.4	0.837129	9.2436	2.38346e-20	4.15107e-19	syntaxin binding protein 1 [Source:HGNC Symbol;Acc:HGNC:11444]
ENSSSCG00000017236	CD3C	8.73319	Myeloid	948.8	0.760385	10.1701	2.69636e-24	5.88544e-23	CMRF35-like molecule 6 precursor [Source:RefSeq peptide;Acc:NP_1231232]
ENSSSCG00000039947	KCNJ2	8.72804	Myeloid	56.6667	1.03867	7.4403	1.00453e-13	1.12806e-12	Inward rectifier potassium channel 2 [Source:UniProtKB/Swiss-Prot;Acc:O18839]
ENSSSCG00000021874	UNC5C	8.72769	Myeloid	42.6	4.23318	1.8255	0.0679253	0.165185	unc-5 netrin receptor C [Source:HGNC Symbol;Acc:HGNC:12569]
ENSSSCG00000040445	RND3	8.72351	Myeloid	44.5333	1.40582	5.49396	3.93012e-08	2.69912e-07	rho-related GTP-binding protein RhoE precursor [Source:RefSeq peptide;Acc:NP_999461]
ENSSSCG00000006400	SLAMF9	8.7214	Myeloid	40.1333	1.58369	4.87557	1.08493e-06	6.25167e-06	SLAM family member 9 [Source:HGNC Symbol;Acc:HGNC:1843]
ENSSSCG00000005665	PHYHD1	8.71886	SWC6gdT	17.8667	3.11408	2.4787	0.0131863	0.04171	phytanoyl-CoA dioxygenase domain containing 1 [Source:HGNC Symbol;Acc:HGNC:23396]
ENSSSCG00000008312	DYSF	8.71695	Myeloid	37.5333	1.19309	6.46802	9.92975e-11	8.765e-10	dysferlin [Source:HGNC Symbol;Acc:HGNC:397]
ENSSSCG00000017300	MRC2	8.71241	Myeloid	533.133	0.452669	17.0377	4.31713e-65	6.05127e-63	mannose receptor C type 2 [Source:HGNC Symbol;Acc:HGNC:16875]
ENSSSCG00000012785	PDZD4	8.70599	Myeloid	26.5333	4.23427	1.81991	0.0687726	0.166993	PDZ domain containing 4 [Source:HGNC Symbol;Acc:HGNC:21167]
ENSSSCG00000037524	LY6D	8.70458	NK	493.067	0.842691	9.14283	6.08411e-20	1.2418e-17	lymphocyte antigen 6 family member D [Source:HGNC Symbol;Acc:HGNC:13348]
ENSSSCG00000031592	ZNF462	8.68943	SWC6gdT	193.533	1.0661	7.21264	5.48788e-13	2.8376e-11	zinc finger protein 462 [Source:HGNC Symbol;Acc:HGNC:21684]
ENSSSCG00000002919	TYROBP	8.6859	Myeloid	4903.13	0.862856	8.90751	5.21892e-19	8.40954e-18	TYRO protein tyrosine kinase-binding protein [Source:UniProtKB/Swiss-Prot;Acc:Q9TU45]
ENSSSCG00000003768	ENSSSCG00000003768	8.67538	Myeloid	21.3333	4.23592	1.81198	0.06999	0.169391
ENSSSCG00000015770	VEGFC	8.67051	NK	48.6	1.69791	4.51762	6.25385e-06	0.000115122	vascular endothelial growth factor C [Source:HGNC Symbol;Acc:HGNC:12682]
ENSSSCG00000022895	CRYBG3	8.66909	Myeloid	393.533	0.704294	10.889	1.29994e-27	3.35332e-26	crystallin beta-gamma domain containing 3 [Source:HGNC Symbol;Acc:HGNC:34427]
ENSSSCG00000040772	ENSSSCG00000040772	8.65166	CD21nB	204.8	4.0352	1.89623	0.0579298	0.186588
ENSSSCG00000032147	ENSSSCG00000032147	8.64149	CD21nB	143.333	4.22823	1.80726	0.0707224	0.217841
ENSSSCG00000004404	ENSSSCG00000004404	8.65163	Myeloid	26.4667	4.23011	1.80885	0.0704746	0.170351
ENSSSCG00000036324	ENSSSCG00000036324	8.63153	CD21nB	279.8	2.00392	3.8083	0.000139925	0.00128079
ENSSSCG00000005284	GNA14	8.63955	NK	54.7333	1.60265	4.76684	1.87142e-06	3.99488e-05	guanine nucleotide-binding protein subunit alpha-14 [Source:RefSeq peptide;Acc:NP_19987]
ENSSSCG00000038429	ENSSSCG00000038429	8.63204	Myeloid	59.6667	0.826739	9.23149	2.66881e-20	4.64109e-19
ENSSSCG00000038719	ENSSSCG00000038719	8.61524	CD21nB	5433.87	0.602477	12.6399	1.27256e-36	2.27769e-34
ENSSSCG00000038688	PGLYRP1	8.62863	Myeloid	42.4	4.22947	1.80368	0.0712809	0.171836	peptidoglycan recognition protein 1 precursor [Source:RefSeq peptide;Acc:NP_1126]
ENSSSCG00000010459	HTR7	8.62295	Myeloid	112.2	0.633286	12.0371	2.26672e-33	8.06452e-32	5-hydroxytryptamine receptor 7 [Source:RefSeq peptide;Acc:NP_99925]
ENSSSCG00000007978	ENSSSCG00000007978	8.53474	CD21nB	10070.1	1.27447	5.91204	3.37899e-09	7.97387e-08
ENSSSCG00000025687	ENSSSCG00000025687	8.61456	Myeloid	213.667	0.857991	8.87487	7.0016e-19	1.12293e-17	leukocyte immunoglobulin-like receptor-like [Source:RefSeq peptide;Acc:NP_1121923]
ENSSSCG00000004520	MAPK4	8.60195	Myeloid	207.533	0.888498	8.55596	1.16892e-17	1.7149e-16	mitogen-activated protein kinase 4 [Source:HGNC Symbol;Acc:HGNC:6878]
ENSSSCG00000025286	MCTP1	8.58322	Myeloid	166.267	0.792647	9.56696	1.10094e-21	2.06587e-20	multiple C2 and transmembrane domain containing 1 [Source:HGNC Symbol;Acc:HGNC:26183]
ENSSSCG00000010703	ENSSSCG00000010703	8.58033	NK	191.933	1.14188	6.63848	3.16936e-11	1.69919e-09
ENSSSCG00000010638	TCF7L2	8.5779	Myeloid	70.4	0.701251	10.8062	3.21557e-27	8.1503e-26	transcription factor 7 like 2 [Source:HGNC Symbol;Acc:HGNC:11641]
ENSSSCG00000034308	LRMDA	8.54243	Myeloid	81.6667	0.753471	10.0102	1.37411e-23	2.86495e-22	leucine rich melanocyte differentiation associated [Source:HGNC Symbol;Acc:HGNC:2345]
ENSSSCG00000003088	APOE	8.54223	Myeloid	79.6	1.01814	7.40788	1.28331e-13	1.43282e-12	apolipoprotein E precursor [Source:RefSeq peptide;Acc:NP_999473]
ENSSSCG00000011037	TMEM236	8.54197	Myeloid	22.8667	4.23461	1.78103	0.0749074	0.179131	transmembrane protein 236 [Source:HGNC Symbol;Acc:HGNC:23473]
ENSSSCG00000015010	EXPH5	8.54175	Myeloid	55.6	1.27266	5.92599	3.10428e-09	2.38227e-08	exophilin 5 [Source:HGNC Symbol;Acc:HGNC:3578]
ENSSSCG00000032582	ENSSSCG00000032582	8.50847	CD21nB	8017.53	0.489596	15.336	4.39139e-53	2.32225e-50
ENSSSCG00000035093	KIF26A	8.5242	NK	193.933	0.925192	8.13258	4.20236e-16	4.79317e-14	kinesin family member 26A [Source:HGNC Symbol;Acc:HGNC:2226]
ENSSSCG00000038096	CCL4	8.51804	NK	159.8	0.738587	10.1789	2.46209e-24	7.3446e-22	C-C motif chemokine 4 [Source:UniProtKB/Swiss-Prot;Acc:Q711P4]
ENSSSCG00000040651	ENSSSCG00000040651	8.5084	CD21nB	2113.4	1.31521	5.70888	1.13723e-08	2.48227e-07
ENSSSCG00000037921	ENSSSCG00000037921	8.49821	CD21nB	544.6	0.440155	17.0354	4.48599e-65	4.01462e-62
ENSSSCG00000037638	PDE6G	8.50005	NK	12.6667	5.91696	1.26755	0.204958	0.553116	phosphodiesterase 6G [Source:HGNC Symbol;Acc:HGNC:8789]
ENSSSCG00000039572	ENSSSCG00000039572	8.49908	NK	8.73333	5.92063	1.2666	0.205298	0.553904
ENSSSCG00000039111	ENSSSCG00000039111	8.49787	CD21nB	3019	0.563826	13.2982	2.37107e-40	4.9259e-38
ENSSSCG00000011618	GATA2	8.48528	CD21nB	40.2	1.74299	4.2945	1.75086e-05	0.000202681	endothelial transcription factor GATA-2 [Source:RefSeq peptide;Acc:NP_99944]
ENSSSCG00000013418	CFD	8.49025	Myeloid	5423	0.614415	12.1909	3.47663e-34	1.27192e-32	Complement factor D [Source:UniProtKB/Swiss-Prot;Acc:P51779]
ENSSSCG00000031037	ENSSSCG00000031037	8.48082	CD21nB	9806.53	0.476493	15.6997	1.51864e-55	9.29886e-53
ENSSSCG00000031848	ENSSSCG00000031848	8.47481	CD21nB	373.533	0.801668	9.32407	1.11964e-20	8.14122e-19
ENSSSCG00000000455	LRIG3	8.47566	Myeloid	44.1333	3.09203	2.41772	0.015618	0.0450757	leucine rich repeats and immunoglobulin like domains 3 [Source:HGNC Symbol;Acc:HGNC:3991]
ENSSSCG00000039490	ENSSSCG00000039490	8.45536	CD21nB	219.667	0.555732	13.4154	4.9135e-41	1.07856e-38
ENSSSCG00000000289	NFE2	8.46928	Myeloid	555	0.368647	20.2613	2.82374e-91	1.05972e-88	transcription factor NF-E2 45 kDa subunit [Source:RefSeq peptide;Acc:NP_117281]
ENSSSCG00000007691	ZP3	8.45813	CD21pB	174.8	0.630428	11.8303	2.72279e-32	3.23234e-30	zona pellucida sperm-binding protein 3 precursor [Source:RefSeq peptide;Acc:NP_99958]
ENSSSCG00000033906	ENSSSCG00000033906	8.45367	CD21nB	11.4667	4.24115	1.75746	0.0788388	0.237317
ENSSSCG00000034426	ENSSSCG00000034426	8.39948	CD21nB	167.8	0.619463	11.945	6.89647e-33	1.09909e-30
ENSSSCG00000003486	ARHGEF1L	8.452	Myeloid	583	0.519121	14.355	9.90741e-47	6.09856e-45	Rho guanine nucleotide exchange factor 1 like [Source:HGNC Symbol;Acc:HGNC:2554]
ENSSSCG00000004889	SERPINB10	8.43461	Myeloid	1878.13	0.601162	12.3671	3.93928e-35	1.52765e-33	serpin B1 [Source:RefSeq peptide;Acc:NP_12319]
ENSSSCG00000038135	ENSSSCG00000038135	8.42528	SWC6gdT	21	4.09113	1.81497	0.0695285	0.161909
ENSSSCG00000031905	KCNS3	8.41761	CD21pB	38.6667	3.77883	1.96294	0.0496534	0.153758	potassium voltage-gated channel subfamily S member 3 [Source:RefSeq peptide;Acc:NP_13861]
ENSSSCG00000009666	EPHX2	8.41346	Myeloid	290.867	0.773154	9.58859	8.93012e-22	1.68932e-20	bifunctional epoxide hydrolase 2 [Source:RefSeq peptide;Acc:NP_11641]
ENSSSCG00000034023	ENSSSCG00000034023	8.39879	CD21nB	86.7333	4.22831	1.74982	0.0801494	0.240262
ENSSSCG00000031578	ENSSSCG00000031578	8.39739	CD21nB	105.133	3.92037	1.88691	0.0591721	0.18979
ENSSSCG00000007675	EPHB4	8.39781	Myeloid	43.8	1.26035	5.86967	4.36669e-09	3.31607e-08	EPH receptor B4 [Source:HGNC Symbol;Acc:HGNC:3395]
ENSSSCG00000039146	ENSSSCG00000039146	8.39364	CD21nB	2883.2	0.423573	17.4554	3.1313e-68	4.04773e-65
ENSSSCG00000039162	ENSSSCG00000039162	8.33968	CD21nB	808.8	2.38801	3.07356	0.00211524	0.0133308
ENSSSCG00000007462	KCNB1	8.37875	NK	35.5333	1.82655	4.03971	5.35169e-05	0.000740328	potassium voltage-gated channel subfamily B member 1 [Source:RefSeq peptide;Acc:NP_999383]
ENSSSCG00000033703	FAM111A	8.37234	Myeloid	1397.93	0.454662	16.215	3.95079e-59	4.37748e-57	family with sequence similarity 111 member A [Source:HGNC Symbol;Acc:HGNC:24725]
ENSSSCG00000039745	HMOX1	8.37082	Myeloid	608.4	0.528915	13.9357	3.84256e-44	2.12878e-42	heme oxygenase 1 [Source:RefSeq peptide;Acc:NP_1427]
ENSSSCG00000020941	LTB4R2	8.36167	Myeloid	23.3333	4.23372	1.73882	0.0820666	0.194215	leukotriene B4 receptor 2 [Source:HGNC Symbol;Acc:HGNC:1926]
ENSSSCG00000039758	ENSSSCG00000039758	8.35434	Myeloid	574.067	0.338238	21.7431	8.03001e-105	4.67106e-102
ENSSSCG00000027991	ENSSSCG00000027991	8.35276	Myeloid	66.7333	0.995393	7.38679	1.50415e-13	1.67617e-12
ENSSSCG00000001979	ENSSSCG00000001979	8.33952	CD21nB	245.533	1.49118	4.92197	8.56783e-07	1.39021e-05
ENSSSCG00000040363	ENSSSCG00000040363	8.31083	CD21nB	168.067	0.642372	11.381	5.20089e-30	6.72301e-28
ENSSSCG00000006088	SDC2	8.33214	NK	230.267	1.02801	7.13237	9.86572e-13	6.55873e-11	syndecan-2 precursor [Source:RefSeq peptide;Acc:NP_132683]
ENSSSCG00000000601	PTPRO	8.32939	Myeloid	1005.53	0.530014	13.8287	1.71183e-43	9.30627e-42	protein tyrosine phosphatase, receptor type O [Source:HGNC Symbol;Acc:HGNC:9678]
ENSSSCG00000013174	CTNND1	8.3236	Myeloid	591.467	0.710792	10.3034	6.79908e-25	1.52999e-23	catenin delta 1 [Source:HGNC Symbol;Acc:HGNC:2515]
ENSSSCG00000040835	MANSC1	8.31687	Myeloid	99.9333	0.994551	7.35696	1.88142e-13	2.09059e-12	MANSC domain containing 1 [Source:HGNC Symbol;Acc:HGNC:2555]
ENSSSCG00000002014	JPH4	8.31171	Myeloid	52.4667	0.970403	7.53471	4.89414e-14	5.63747e-13	junctophilin 4 [Source:HGNC Symbol;Acc:HGNC:2156]
ENSSSCG00000032019	DNASE1L3	8.3101	CD21nB	41.0667	1.217	6.00664	1.89413e-09	4.65883e-08	deoxyribonuclease 1 like 3 [Source:HGNC Symbol;Acc:HGNC:2959]
ENSSSCG00000033797	ENSSSCG00000033797	8.29834	CD21nB	556.267	1.66404	4.38592	1.15498e-05	0.000141591
ENSSSCG00000027941	LSAMP	8.3046	NK	157.733	0.992776	7.35775	1.87029e-13	1.37715e-11	limbic system-associated membrane protein precursor [Source:RefSeq peptide;Acc:NP_1231626]
ENSSSCG00000013504	TMIGD2	8.30323	CD8T	79.7333	0.956614	7.63445	2.26778e-14	9.2396e-13	transmembrane and immunoglobulin domain containing 2 [Source:HGNC Symbol;Acc:HGNC:28324]
ENSSSCG00000030775	ENSSSCG00000030775	8.29574	CD21nB	5627.73	0.423103	17.2434	1.2536e-66	1.32585e-63
ENSSSCG00000025208	RNF39	8.29786	Myeloid	76.4	0.904465	8.06871	7.10475e-16	9.26644e-15	RING finger protein 39 [Source:RefSeq peptide;Acc:NP_1121918]
ENSSSCG00000035379	JCHAIN	8.28818	CD21nB	13572.9	0.523319	13.9268	4.35205e-44	1.33241e-41	joining chain of multimeric IgA and IgM [Source:HGNC Symbol;Acc:HGNC:5713]
ENSSSCG00000036203	ENSSSCG00000036203	8.29436	CD21pB	1800.53	1.01971	7.1534	8.46532e-13	2.2957e-11
ENSSSCG00000026360	CLGN	8.29067	CD21pB	48.8	4.22871	1.72409	0.084692	0.230336	calmegin precursor [Source:RefSeq peptide;Acc:NP_123136]
ENSSSCG00000037913	ENSSSCG00000037913	8.28777	CD21nB	1726.4	0.536774	13.577	5.48371e-42	1.35739e-39
ENSSSCG00000038204	ENSSSCG00000038204	8.2751	CD21nB	603	0.495984	14.668	1.03313e-48	4.14462e-46
ENSSSCG00000032147	ENSSSCG00000032147	8.28547	CD21pB	143.333	4.22828	1.72303	0.0848823	0.230783
ENSSSCG00000037402	ENSSSCG00000037402	8.25525	CD21nB	827.867	0.49301	14.7162	5.07207e-49	2.10744e-46
ENSSSCG00000034315	ENSSSCG00000034315	8.27462	CD21pB	151.333	0.834239	8.72006	2.78043e-18	1.27856e-16
ENSSSCG00000005122	TEK	8.26354	Myeloid	607.333	0.436269	16.6492	3.06465e-62	3.83377e-60	TEK receptor tyrosine kinase [Source:HGNC Symbol;Acc:HGNC:11724]
ENSSSCG00000031715	CARD9	8.25542	Myeloid	1053.47	1.14728	6.32403	2.54828e-10	2.15299e-09	caspase recruitment domain family member 9 [Source:HGNC Symbol;Acc:HGNC:16391]
ENSSSCG00000036127	ENSSSCG00000036127	8.22046	CD21nB	682.6	0.461525	15.6448	3.60527e-55	2.09718e-52
ENSSSCG00000017313	ENSSSCG00000017313	8.24481	SWC6gdT	167.333	1.1005	6.58322	4.6036e-11	1.58457e-09	corticotropin-releasing factor receptor 1 precursor [Source:RefSeq peptide;Acc:NP_1137582]
ENSSSCG00000010974	CNTFR	8.2423	Myeloid	21.0667	2.06419	3.50855	0.000450563	0.00177871	ciliary neurotrophic factor receptor [Source:HGNC Symbol;Acc:HGNC:217]
ENSSSCG00000000600	EPS8	8.23814	Myeloid	484.067	0.4053	17.8587	2.47163e-71	4.10785e-69	epidermal growth factor receptor pathway substrate 8 [Source:HGNC Symbol;Acc:HGNC:342]
ENSSSCG00000022258	ENSSSCG00000022258	8.23361	Myeloid	445.067	0.450054	16.0728	3.96105e-58	4.18935e-56
ENSSSCG00000039553	ASPG	8.23313	Myeloid	17.3333	2.72416	2.65518	0.00792657	0.0243704	asparaginase [Source:HGNC Symbol;Acc:HGNC:2123]
ENSSSCG00000035542	ENSSSCG00000035542	8.21099	CD21nB	91.4	3.78588	1.9047	0.0568184	0.183925
ENSSSCG00000026422	GPER1	8.21822	NK	35.5333	1.5693	4.59966	4.23185e-06	8.16474e-05	G protein-coupled estrogen receptor 1 [Source:HGNC Symbol;Acc:HGNC:4485]
ENSSSCG00000003761	ADGRL2	8.21771	Myeloid	217.933	0.660303	10.9309	8.20203e-28	2.15401e-26	adhesion G protein-coupled receptor L2 [Source:HGNC Symbol;Acc:HGNC:18582]
ENSSSCG00000003331	TNFRSF4	8.21379	CD4CD8T	560.133	1.31274	5.49519	3.90284e-08	9.36198e-07	TNF receptor superfamily member 4 [Source:HGNC Symbol;Acc:HGNC:11918]
ENSSSCG00000032700	ENSSSCG00000032700	8.19645	CD21nB	781.467	0.487096	14.7742	2.14907e-49	9.26009e-47
ENSSSCG00000010404	ALOX5	8.20149	Myeloid	147.533	0.890049	8.09111	5.91216e-16	7.74573e-15	arachidonate 5-lipoxygenase [Source:HGNC Symbol;Acc:HGNC:435]
ENSSSCG00000031799	TMEM139	8.19914	Myeloid	25.4	1.26993	5.66894	1.43684e-08	1.03634e-07	transmembrane protein 139 [Source:HGNC Symbol;Acc:HGNC:2258]
ENSSSCG00000003733	KLHL14	8.19911	CD21pB	45.4	1.03881	6.93014	4.20433e-12	1.06102e-10	kelch like family member 14 [Source:HGNC Symbol;Acc:HGNC:29266]
ENSSSCG00000011819	MB21D2	8.19804	Myeloid	38.6	1.33268	5.40119	6.62008e-08	4.42632e-07	Mab-21 domain containing 2 [Source:HGNC Symbol;Acc:HGNC:3438]
ENSSSCG00000016129	GPR1	8.19733	Myeloid	35.9333	1.40607	5.11874	3.07576e-07	1.90135e-06	G-protein coupled receptor 1 [Source:RefSeq peptide;Acc:NP_1177173]
ENSSSCG00000031085	ENSSSCG00000031085	8.15591	CD21nB	4267.07	1.41491	5.05751	4.24776e-07	7.22492e-06
ENSSSCG00000007146	SIGLEC1	8.19291	Myeloid	121.133	0.561976	12.7993	1.65408e-37	7.04891e-36	sialoadhesin precursor [Source:RefSeq peptide;Acc:NP_999511]
ENSSSCG00000037735	ENSSSCG00000037735	8.19026	Myeloid	17.2	2.22596	3.23018	0.0012371	0.00446832
ENSSSCG00000037736	ENSSSCG00000037736	8.15213	CD21nB	218.6	0.6166	11.5993	4.15419e-31	5.75355e-29
ENSSSCG00000011713	P2RY12	8.1538	Myeloid	50.7333	1.44081	4.96512	6.86588e-07	4.04854e-06	P2Y purinoceptor 12 [Source:RefSeq peptide;Acc:NP_1166989]
ENSSSCG00000031053	S100A1	8.15301	NK	1066.07	0.941179	7.60006	2.95999e-14	2.40815e-12	S1 calcium binding protein A1 [Source:HGNC Symbol;Acc:HGNC:1486]
ENSSSCG00000037214	ENSSSCG00000037214	8.15058	CD21nB	23225.5	0.495535	14.43	3.34908e-47	1.25688e-44
ENSSSCG00000031090	ENSSSCG00000031090	8.12563	CD21nB	20.2667	1.75984	4.04903	5.14308e-05	0.000535673
ENSSSCG00000006233	CA8	8.14967	CD21pB	559.133	0.405358	17.6379	1.26035e-69	1.2219e-66	carbonic anhydrase 8 [Source:HGNC Symbol;Acc:HGNC:1382]
ENSSSCG00000012278	CFP	8.14965	Myeloid	1185.8	0.39095	18.2879	1.03287e-74	2.00274e-72	complement factor properdin [Source:HGNC Symbol;Acc:HGNC:8864]
ENSSSCG00000035226	ENSSSCG00000035226	8.14816	Myeloid	266.6	0.705646	10.1299	4.06864e-24	8.81463e-23
ENSSSCG00000023396	LIX1	8.14701	CD8T	517.667	0.802294	8.90822	5.18568e-19	3.3235e-17	limb and CNS expressed 1 [Source:HGNC Symbol;Acc:HGNC:18581]
ENSSSCG00000012182	PCYT1B	8.14238	Myeloid	27.5333	1.7411	4.10223	4.09191e-05	0.000190041	phosphate cytidylyltransferase 1, choline, beta [Source:HGNC Symbol;Acc:HGNC:8755]
ENSSSCG00000009048	GAB1	8.13743	Myeloid	60.3333	1.0197	6.99951	2.56852e-12	2.58273e-11	GRB2 associated binding protein 1 [Source:HGNC Symbol;Acc:HGNC:466]
ENSSSCG00000004888	SERPINB8	8.12868	Myeloid	297.333	0.635071	11.225	3.07336e-29	8.89441e-28	serpin family B member 8 [Source:HGNC Symbol;Acc:HGNC:8952]
ENSSSCG00000036224	ENSSSCG00000036224	8.08953	CD21nB	17293	0.509828	13.9057	5.84683e-44	1.74416e-41
ENSSSCG00000007410	PTI	8.12484	Myeloid	217.133	0.744032	9.57599	1.00883e-21	1.89915e-20	pancreatic trypsin inhibitor precursor [Source:RefSeq peptide;Acc:NP_1177144]
ENSSSCG00000036324	ENSSSCG00000036324	8.10603	CD21pB	279.8	2.00401	3.54591	0.000391259	0.00272909
ENSSSCG00000028460	S1PR5	8.09718	NK	1510.47	0.491388	14.4431	2.77003e-47	4.02832e-44	sphingosine 1-phosphate receptor 5 [Source:RefSeq peptide;Acc:NP_1116581]
ENSSSCG00000022483	GPBAR1	8.09604	Myeloid	53.0667	0.949732	7.47162	7.92114e-14	8.96445e-13	G protein-coupled bile acid receptor 1 [Source:HGNC Symbol;Acc:HGNC:1968]
ENSSSCG00000036233	ENSSSCG00000036233	8.07628	CD21nB	242.733	0.649701	10.8916	1.26416e-27	1.36178e-25
ENSSSCG00000034060	ENSSSCG00000034060	8.08709	Myeloid	32.9333	4.22943	1.67566	0.0938045	0.218308
ENSSSCG00000015579	PTGS2	8.07909	Myeloid	152.6	0.735618	9.62331	6.37432e-22	1.21972e-20	prostaglandin G/H synthase 2 precursor [Source:RefSeq peptide;Acc:NP_999486]
ENSSSCG00000035483	ENSSSCG00000035483	8.0781	CD21pB	1112.6	0.497786	14.2192	6.96918e-46	2.07896e-43
ENSSSCG00000035443	ENSSSCG00000035443	8.03669	CD21nB	2067.33	0.582311	12.0841	1.28181e-33	2.07119e-31
ENSSSCG00000009953	ENSSSCG00000009953	8.07018	NK	26.7333	2.43663	2.90162	0.00371238	0.026644
ENSSSCG00000017018	ENSSSCG00000017018	8.06476	Myeloid	23.2	4.23303	1.66896	0.0951254	0.220832
ENSSSCG00000040772	ENSSSCG00000040772	8.0543	CD21pB	204.8	4.03527	1.74816	0.0804364	0.221753
ENSSSCG00000031831	CADM1	8.05322	Myeloid	293.133	0.544104	12.963	1.9835e-38	8.77415e-37	cell adhesion molecule 1 [Source:HGNC Symbol;Acc:HGNC:5951]
ENSSSCG00000005224	GLIS3	8.05209	Myeloid	29.4667	1.28555	5.48568	4.11884e-08	2.82372e-07	GLIS family zinc finger 3 [Source:HGNC Symbol;Acc:HGNC:2851]
ENSSSCG00000039562	ENSSSCG00000039562	8.04545	NK	122.8	1.77807	3.96241	7.41959e-05	0.000989186	testis development-related protein [Source:RefSeq peptide;Acc:NP_1185854]
ENSSSCG00000016716	GSDME	8.04071	NK	27.8667	2.98453	2.35906	0.0183211	0.095539	gasdermin E [Source:HGNC Symbol;Acc:HGNC:281]
ENSSSCG00000033114	ENSSSCG00000033114	8.03031	CD21nB	318.867	0.50073	14.0401	8.85476e-45	2.94332e-42
ENSSSCG00000036246	ENSSSCG00000036246	8.03325	Myeloid	407.733	0.445016	15.8045	2.89672e-56	2.88038e-54
ENSSSCG00000029715	OLFM1	8.03206	Myeloid	960.067	0.506817	13.875	8.98413e-44	4.93025e-42	olfactomedin 1 [Source:HGNC Symbol;Acc:HGNC:17187]
ENSSSCG00000005762	KCNT1	8.03141	Myeloid	282.733	0.382469	18.3843	1.75622e-75	3.58454e-73	potassium sodium-activated channel subfamily T member 1 [Source:HGNC Symbol;Acc:HGNC:18865]
ENSSSCG00000013101	ENSSSCG00000013101	8.03127	Myeloid	301.733	0.773559	9.08951	9.9489e-20	1.6654e-18
ENSSSCG00000026850	SNCG	8.00817	CD21nB	122.533	1.00741	6.95661	3.48562e-12	1.23257e-10	gamma-synuclein [Source:RefSeq peptide;Acc:NP_196681]
ENSSSCG00000036318	ENSSSCG00000036318	8.00942	CD21pB	1464.53	2.08555	3.36094	0.000776781	0.0049168
ENSSSCG00000010044	ENSSSCG00000010044	7.91928	CD21nB	12662.2	0.547063	12.648	1.14689e-36	2.08483e-34
ENSSSCG00000012257	MAOA	8.00308	Myeloid	358.067	1.34326	5.2135	1.85313e-07	1.17426e-06	amine oxidase [Source:RefSeq peptide;Acc:NP_1164]
ENSSSCG00000027796	SLC22A7	8.00302	CD21pB	349.267	0.548112	12.7766	2.21433e-37	3.62838e-35	Solute carrier family 22 member 7 [Source:UniProtKB/Swiss-Prot;Acc:Q1RPP5]
ENSSSCG00000036203	ENSSSCG00000036203	7.99276	NK	1800.53	1.43639	4.86828	1.12572e-06	2.51375e-05
ENSSSCG00000023178	BATF2	7.98994	Myeloid	59.6667	1.24921	5.59551	2.19979e-08	1.55482e-07	basic leucine zipper ATF-like transcription factor 2 [Source:HGNC Symbol;Acc:HGNC:25163]
ENSSSCG00000017037	FABP6	7.97539	NK	447.067	3.2392	2.15343	0.0312849	0.143464	gastrotropin [Source:RefSeq peptide;Acc:NP_99938]
ENSSSCG00000002368	LTBP2	7.96688	CD21pB	22.9333	1.70751	4.08013	4.50096e-05	0.000412967	latent transforming growth factor beta binding protein 2 [Source:HGNC Symbol;Acc:HGNC:6715]
ENSSSCG00000031282	ENSSSCG00000031282	7.95689	CD21pB	455.533	1.28738	5.40392	6.51992e-08	1.00334e-06
ENSSSCG00000016033	GULP1	7.95621	CD4T	21.6	1.9317	3.60107	0.000316906		GULP, engulfment adaptor PTB domain containing 1 [Source:HGNC Symbol;Acc:HGNC:18649]
ENSSSCG00000001727	TNFRSF21	7.94673	Myeloid	833.2	0.275765	25.1908	5.05571e-140	6.53535e-137	TNF receptor superfamily member 21 [Source:HGNC Symbol;Acc:HGNC:13469]
ENSSSCG00000009314	FLT3	7.94336	Myeloid	590.2	0.644198	10.7783	4.35832e-27	1.09988e-25	fms related tyrosine kinase 3 [Source:HGNC Symbol;Acc:HGNC:3765]
ENSSSCG00000030172	CD4LG	7.9428	CD4CD8T	970	0.408434	16.9986	8.41297e-65	4.89383e-61	CD4 ligand [Source:RefSeq peptide;Acc:NP_999291]
ENSSSCG00000039761	MYCL	7.92835	Myeloid	259.2	0.568243	12.1926	3.4043e-34	1.24939e-32	MYCL proto-oncogene, bHLH transcription factor [Source:HGNC Symbol;Acc:HGNC:7555]
ENSSSCG00000032810	GZMM	7.92771	CD8T	626.333	0.730833	9.47919	2.56257e-21	2.03012e-19	granzyme M precursor [Source:RefSeq peptide;Acc:NP_1137184]
ENSSSCG00000010768	CFAP46	7.92583	CD4T	100.733	1.03501	6.69157	2.20782e-11	8.74543e-10	cilia and flagella associated protein 46 [Source:HGNC Symbol;Acc:HGNC:25247]
ENSSSCG00000040529	ENSSSCG00000040529	7.89874	CD21nB	980.8	1.43962	4.79205	1.65089e-06	2.45607e-05
ENSSSCG00000031578	ENSSSCG00000031578	7.91436	CD21pB	105.133	3.92048	1.76365	0.0777904	0.216045
ENSSSCG00000016725	ENSSSCG00000016725	7.91315	Myeloid	794.4	0.447187	15.4592	6.54076e-54	5.72144e-52
ENSSSCG00000013777	CLEC17A	7.9013	CD21pB	2281.4	0.559085	12.3439	5.25321e-35	6.94499e-33	C-type lectin domain containing 17A [Source:HGNC Symbol;Acc:HGNC:3452]
ENSSSCG00000039391	ENSSSCG00000039391	7.87715	CD21nB	439.6	0.709867	9.68794	3.39287e-22	2.63151e-20
ENSSSCG00000010491	ENSSSCG00000010491	7.88991	Myeloid	30.4	1.24049	5.55419	2.78908e-08	1.95471e-07
ENSSSCG00000034555	ENSSSCG00000034555	7.88538	Myeloid	1838.53	0.390121	17.6494	1.02916e-69	1.618e-67
ENSSSCG00000005608	ANGPTL2	7.88092	NK	23.5333	2.06564	3.33113	0.000864938	0.00805015	angiopoietin-related protein 2 precursor [Source:RefSeq peptide;Acc:NP_113416]
ENSSSCG00000008228	GNLY	7.87752	CD8T	32622.9	1.1914	5.77265	7.80363e-09	1.60983e-07	antimicrobial peptide NK-lysin precursor [Source:RefSeq peptide;Acc:NP_1265684]
ENSSSCG00000031364	ENSSSCG00000031364	7.8749	CD21nB	580.8	0.590906	11.6345	2.75148e-31	3.90374e-29
ENSSSCG00000034215	ENSSSCG00000034215	7.84484	CD21nB	162.8	0.788529	8.68051	3.94003e-18	2.37504e-16
ENSSSCG00000001982	ENSSSCG00000001982	7.87297	SWC6gdT	31.2	4.22902	1.62519	0.104122	0.226675
ENSSSCG00000011322	CCR1	7.8659	Myeloid	810.8	0.566714	12.1153	8.76583e-34	3.16713e-32	C-C chemokine receptor type 1 [Source:RefSeq peptide;Acc:NP_11621]
ENSSSCG00000010381	ARHGAP22	7.84799	Myeloid	253.8	0.640172	10.6971	1.0502e-26	2.57221e-25	Rho GTPase activating protein 22 [Source:HGNC Symbol;Acc:HGNC:332]
ENSSSCG00000036654	ENSSSCG00000036654	7.84124	CD21nB	185.867	0.688999	9.92925	3.10576e-23	2.50919e-21
ENSSSCG00000032163	ENSSSCG00000032163	7.83222	CD21nB	854.933	0.456208	14.9761	1.05212e-50	4.89616e-48
ENSSSCG00000036628	ENSSSCG00000036628	7.78832	CD21nB	71.4667	3.82492	1.77476	0.075937	0.230365
ENSSSCG00000002684	CDH13	7.83167	CD4T	206.733	0.87574	7.80102	6.14068e-15	4.12076e-13	cadherin-13 precursor [Source:RefSeq peptide;Acc:NP_113415]
ENSSSCG00000015618	LAMB3	7.82957	CD8T	97.5333	0.842646	8.1049	5.27879e-16	2.53027e-14	laminin subunit beta 3 [Source:HGNC Symbol;Acc:HGNC:649]
ENSSSCG00000004202	SAMD3	7.82118	NK	620.467	0.657607	10.3727	3.29963e-25	1.19962e-22	sterile alpha motif domain containing 3 [Source:HGNC Symbol;Acc:HGNC:21574]
ENSSSCG00000024765	ENSSSCG00000024765	7.81408	NK	33.0667	1.37155	4.96815	6.7595e-07	1.56654e-05
ENSSSCG00000022512	TRDC	7.81105	SWC6gdT	30681.6	0.555976	12.2506	1.66732e-34	1.38554e-31	T cell receptor delta constant [Source:HGNC Symbol;Acc:HGNC:12253]
ENSSSCG00000003218	MYBPC2	7.80697	CD21pB	30.5333	3.65846	1.86061	0.0627989	0.184495	myosin binding protein C, fast type [Source:HGNC Symbol;Acc:HGNC:755]
ENSSSCG00000031788	PTAFR	7.80672	NK	410.4	0.663491	10.259	1.07871e-24	3.58564e-22	platelet activating factor receptor [Source:HGNC Symbol;Acc:HGNC:9582]
ENSSSCG00000032341	AIF1	7.80446	Myeloid	2347.47	0.432066	15.7487	7.01583e-56	6.80353e-54	allograft inflammatory factor 1 [Source:RefSeq peptide;Acc:NP_1123422]
ENSSSCG00000037426	ENSSSCG00000037426	7.8021	Myeloid	2463.33	0.402245	16.9103	3.77558e-64	5.04887e-62
ENSSSCG00000016664	NPSR1	7.79522	SWC6gdT	27.7333	4.23315	1.60524	0.108441	0.234402	neuropeptide S receptor 1 [Source:HGNC Symbol;Acc:HGNC:23631]
ENSSSCG00000015584	PROX1	7.79	CD21pB	41.6667	3.66123	1.85457	0.0636582	0.186596	prospero homeobox protein 1 [Source:RefSeq peptide;Acc:NP_1121962]
ENSSSCG00000001849	ANPEP	7.72385	CD21nB	220.2	0.727213	9.24605	2.3295e-20	1.63261e-18	aminopeptidase N [Source:RefSeq peptide;Acc:NP_999442]
ENSSSCG00000016620	TSPAN12	7.7864	Myeloid	426.6	0.45428	14.9388	1.84231e-50	1.3828e-48	tetraspanin-12 [Source:RefSeq peptide;Acc:NP_123162]
ENSSSCG00000010915	NAV1	7.78587	Myeloid	645.133	0.573015	11.8424	2.35593e-32	7.92164e-31	neuron navigator 1 [Source:HGNC Symbol;Acc:HGNC:15989]
ENSSSCG00000021158	MCF2L	7.7776	Myeloid	325	0.56388	12.0196	2.80416e-33	9.88592e-32	MCF.2 cell line derived transforming sequence like [Source:HGNC Symbol;Acc:HGNC:14576]
ENSSSCG00000035045	DOCK1	7.77385	Myeloid	274.867	0.457851	14.7949	1.58103e-49	1.10805e-47	dedicator of cytokinesis 1 [Source:HGNC Symbol;Acc:HGNC:2987]
ENSSSCG00000005828	EGFL7	7.7721	Myeloid	149.933	0.732624	9.24362	2.38306e-20	4.15107e-19	EGF like domain multiple 7 [Source:HGNC Symbol;Acc:HGNC:2594]
ENSSSCG00000034766	ENSSSCG00000034766	7.76318	NK	7307.2	0.786079	8.60369	7.71931e-18	1.0952e-15
ENSSSCG00000015839	ENSSSCG00000015839	7.76066	Myeloid	340.467	0.532168	12.704	5.61889e-37	2.34302e-35
ENSSSCG00000007334	SRC	7.75689	Myeloid	498.467	0.482465	14.0049	1.45418e-44	8.13362e-43	SRC proto-oncogene, non-receptor tyrosine kinase [Source:HGNC Symbol;Acc:HGNC:11283]
ENSSSCG00000040579	ZNF683	7.74216	NK	3771.07	0.425254	15.8544	1.31001e-56	1.52406e-52	zinc finger protein 683 [Source:HGNC Symbol;Acc:HGNC:28495]
ENSSSCG00000039102	ENSSSCG00000039102	7.74086	CD21pB	344.867	0.558624	12.0669	1.57965e-33	1.97609e-31
ENSSSCG00000004497	PSTPIP2	7.73942	Myeloid	1433.6	0.627121	10.7466	6.14853e-27	1.5252e-25	proline-serine-threonine phosphatase interacting protein 2 [Source:HGNC Symbol;Acc:HGNC:9581]
ENSSSCG00000005641	DNM1	7.73396	Myeloid	27.2	1.12236	5.9998	1.97555e-09	1.54772e-08	dynamin 1 [Source:HGNC Symbol;Acc:HGNC:2972]
ENSSSCG00000023258	CLEC4F	7.72415	Myeloid	19.6	2.71598	2.47577	0.0132949	0.0389996	C-type lectin domain family 4 member F [Source:HGNC Symbol;Acc:HGNC:25357]
ENSSSCG00000034842	ENSSSCG00000034842	7.7086	CD21nB	124.2	0.694508	9.6595	4.48036e-22	3.45196e-20
ENSSSCG00000006457	FCRL3	7.71812	CD21pB	4122.8	0.492935	13.6288	2.69903e-42	6.15696e-40	Fc receptor like 3 [Source:HGNC Symbol;Acc:HGNC:1856]
ENSSSCG00000017283	CD79B	7.71746	CD21pB	9910.53	0.319936	20.9963	7.09125e-98	1.64999e-94	B-cell antigen receptor complex-associated protein beta chain precursor [Source:RefSeq peptide;Acc:NP_123841]
ENSSSCG00000005229	VLDLR	7.71626	Myeloid	269.6	0.467254	14.3739	7.54742e-47	4.67057e-45	very low-density lipoprotein receptor precursor [Source:RefSeq peptide;Acc:NP_1186819]
ENSSSCG00000029370	ENSSSCG00000029370	7.71015	SWC6gdT	47	1.35035	4.96921	6.72266e-07	9.15824e-06
ENSSSCG00000038215	ENSSSCG00000038215	7.70909	Myeloid	30.2	4.23078	1.58578	0.112789	0.25529
ENSSSCG00000037837	ENSSSCG00000037837	7.66665	CD21nB	229.133	2.33022	2.86095	0.00422371	0.0238036
ENSSSCG00000017046	EBF1	7.69604	CD21pB	448.533	0.615983	10.8705	1.59349e-27	1.35318e-25	early B cell factor 1 [Source:HGNC Symbol;Acc:HGNC:3126]
ENSSSCG00000005614	FAM129B	7.69355	Myeloid	559.267	0.469646	14.2523	4.33568e-46	2.61354e-44	family with sequence similarity 129 member B [Source:HGNC Symbol;Acc:HGNC:25282]
ENSSSCG00000033225	ENSSSCG00000033225	7.68621	CD21pB	863	1.5209	4.39623	1.10147e-05	0.000113906
ENSSSCG00000012229	GP91-PHOX	7.68374	Myeloid	2430.13	0.421872	15.8431	1.56965e-56	1.58794e-54	cytochrome b-245 heavy chain precursor [Source:RefSeq peptide;Acc:NP_99928]
ENSSSCG00000037682	HFE	7.67906	Myeloid	273.333	0.36565	18.2663	1.53604e-74	2.92955e-72	hemochromatosis [Source:HGNC Symbol;Acc:HGNC:4886]
ENSSSCG00000001672	CRIP3	7.67644	CD21pB	107.8	0.833491	8.01021	1.14513e-15	4.16328e-14	cysteine rich protein 3 [Source:HGNC Symbol;Acc:HGNC:17751]
ENSSSCG00000006088	SDC2	7.67126	Myeloid	230.267	0.757479	8.80719	1.28325e-18	2.01747e-17	syndecan-2 precursor [Source:RefSeq peptide;Acc:NP_132683]
ENSSSCG00000016678	NOD1	7.6708	Myeloid	184.2	0.465907	14.3179	1.69189e-46	1.03055e-44	nucleotide-binding oligomerization domain-containing protein 1 [Source:RefSeq peptide;Acc:NP_117749]
ENSSSCG00000021812	MS4A1	7.67039	CD21pB	9127.93	0.369144	18.0699	5.50561e-73	5.82293e-70	B-lymphocyte antigen CD2 [Source:RefSeq peptide;Acc:NP_123323]
ENSSSCG00000026707	XCR1	7.66268	CD21nB	111.067	0.651339	10.2292	1.46707e-24	1.26429e-22	chemokine XC receptor 1 [Source:RefSeq peptide;Acc:NP_11622]
ENSSSCG00000033813	ENSSSCG00000033813	7.62697	CD21nB	570.933	0.644745	10.2784	8.81506e-25	7.71086e-23
ENSSSCG00000038719	ENSSSCG00000038719	7.65611	CD21pB	5433.87	0.602509	11.0473	2.25851e-28	1.9756e-26
ENSSSCG00000010655	GFRA1	7.65451	CD21pB	36.4	1.07432	6.19414	5.8603e-10	1.16346e-08	GDNF family receptor alpha 1 [Source:HGNC Symbol;Acc:HGNC:4243]
ENSSSCG00000040381	ENSSSCG00000040381	7.65239	CD21pB	2714.47	0.458356	14.5136	9.9382e-48	3.30346e-45
ENSSSCG00000007648	GAL3ST4	7.64978	Myeloid	25.3333	1.64322	4.04679	5.19248e-05	0.000236899	galactose-3-O-sulfotransferase 4 [Source:HGNC Symbol;Acc:HGNC:24145]
ENSSSCG00000004087	CCDC17	7.64486	Myeloid	78.3333	0.825019	8.05418	8.00104e-16	1.03889e-14	coiled-coil domain containing 17 [Source:HGNC Symbol;Acc:HGNC:21177]
ENSSSCG00000008898	ENSSSCG00000008898	7.64026	NK	2238.4	0.481926	13.7786	3.42986e-43	3.32626e-40	Homeodomain-only protein [Source:UniProtKB/Swiss-Prot;Acc:Q8MJD6]
ENSSSCG00000035218	ADA2	7.63043	Myeloid	2454.07	0.421016	15.7486	7.01756e-56	6.80353e-54	adenosine deaminase 2 precursor [Source:RefSeq peptide;Acc:NP_999181]
ENSSSCG00000006357	FCER1G	7.62772	Myeloid	4807.13	0.44819	14.7878	1.75685e-49	1.22391e-47	High affinity immunoglobulin epsilon receptor subunit gamma [Source:UniProtKB/Swiss-Prot;Acc:Q9XSZ6]
ENSSSCG00000021812	MS4A1	7.60836	CD21nB	9127.93	0.369146	17.9018	1.14274e-71	2.21577e-68	B-lymphocyte antigen CD2 [Source:RefSeq peptide;Acc:NP_123323]
ENSSSCG00000026547	SLC45A3	7.6266	Myeloid	248.8	0.615826	10.7605	5.28736e-27	1.32002e-25	solute carrier family 45 member 3 [Source:HGNC Symbol;Acc:HGNC:8642]
ENSSSCG00000009231	CDS1	7.626	Myeloid	67.5333	0.911165	7.272	3.54193e-13	3.82608e-12	phosphatidate cytidylyltransferase 1 [Source:RefSeq peptide;Acc:NP_137999]
ENSSSCG00000036017	ENSSSCG00000036017	7.62381	Myeloid	29.7333	1.54239	4.2945	1.75086e-05	8.52638e-05
ENSSSCG00000004736	SPTBN5	7.62261	Myeloid	45.4667	1.33719	4.95264	7.32134e-07	4.30184e-06	spectrin beta, non-erythrocytic 5 [Source:HGNC Symbol;Acc:HGNC:1568]
ENSSSCG00000038215	ENSSSCG00000038215	7.61979	NK	30.2	5.91637	1.11889	0.263185	0.651191
ENSSSCG00000006374	CD244	7.61325	NK	1450.4	0.841976	7.85444	4.01563e-15	3.95913e-13	CD244 molecule [Source:HGNC Symbol;Acc:HGNC:18171]
ENSSSCG00000017705	CCL5	7.61159	CD8T	18420.5	0.540777	12.2261	2.25545e-34	5.59351e-32	C-C motif chemokine 5 precursor [Source:RefSeq peptide;Acc:NP_1123418]
ENSSSCG00000017700	CCL3L1	7.61127	NK	139.933	0.932775	7.08774	1.36319e-12	8.90065e-11	C-C motif chemokine 3-like 1 precursor [Source:RefSeq peptide;Acc:NP_19579]
ENSSSCG00000036318	ENSSSCG00000036318	7.60932	NK	1464.53	2.92558	2.25914	0.0238744	0.116944
ENSSSCG00000035017	ENSSSCG00000035017	7.53208	CD21nB	44.8	4.19189	1.55827	0.11917	0.323327
ENSSSCG00000026217	ENSSSCG00000026217	7.60771	NK	290.733	1.26461	5.22509	1.74067e-07	4.4705e-06
ENSSSCG00000006456	FCRL1	7.60601	CD21pB	2002.87	0.611704	10.7994	3.46647e-27	2.90136e-25	Fc receptor like 1 [Source:HGNC Symbol;Acc:HGNC:1859]
ENSSSCG00000001979	ENSSSCG00000001979	7.59438	SWC6gdT	245.533	1.49135	4.42176	9.79008e-06	9.44426e-05
ENSSSCG00000037697	MGP	7.59365	Myeloid	129.267	0.733186	8.99314	2.40268e-19	3.94236e-18	Matrix Gla protein [Source:UniProtKB/Swiss-Prot;Acc:Q8MJ39]
ENSSSCG00000038434	ENSSSCG00000038434	7.59158	SWC6gdT	399.533	2.2255	2.96184	0.00305806	0.0125538
ENSSSCG00000025969	PTPRR	7.58918	NK	13.6667	2.17229	3.0333	0.00241898	0.0188876	protein tyrosine phosphatase, receptor type R [Source:HGNC Symbol;Acc:HGNC:968]
ENSSSCG00000036983	ENSSSCG00000036983	7.58437	CD21pB	4394.6	0.989949	6.65122	2.90668e-11	6.8593e-10
ENSSSCG00000031640	ENSSSCG00000031640	7.5768	Myeloid	45.0667	0.860997	7.63859	2.19619e-14	2.60454e-13
ENSSSCG00000015019	COLCA2	7.56701	CD21pB	12.5333	3.61665	1.81577	0.0694054	0.199079	colorectal cancer associated 2 [Source:HGNC Symbol;Acc:HGNC:26978]
ENSSSCG00000037991	RCVRN	7.56353	NK	35.6667	2.17235	3.0214	0.00251611	0.019541	recoverin [Source:HGNC Symbol;Acc:HGNC:9937]
ENSSSCG00000036630	GCSAML	7.55504	SWC6gdT	62	1.14938	5.70313	1.17629e-08	2.47468e-07	germinal center associated signaling and motility like [Source:HGNC Symbol;Acc:HGNC:29583]
ENSSSCG00000017894	WSCD1	7.55252	NK	286.733	0.566267	11.5714	5.75137e-31	2.90919e-28	WSC domain containing 1 [Source:HGNC Symbol;Acc:HGNC:296]
ENSSSCG00000002412	STON2	7.5465	SWC6gdT	74.4667	1.38098	4.74048	2.13209e-06	2.49545e-05	stonin 2 [Source:HGNC Symbol;Acc:HGNC:3652]
ENSSSCG00000024518	ENSSSCG00000024518	7.54615	Myeloid	1268.87	0.301491	21.7126	1.56008e-104	8.64286e-102
ENSSSCG00000022162	RAB11FIP5	7.54346	Myeloid	423.2	0.423021	15.4684	5.66998e-54	5.03546e-52	RAB11 family interacting protein 5 [Source:HGNC Symbol;Acc:HGNC:24845]
ENSSSCG00000004678	DUOX2	7.54174	CD21pB	114.2	1.32871	4.92338	8.50627e-07	1.0935e-05	dual oxidase 2 precursor [Source:RefSeq peptide;Acc:NP_999164]
ENSSSCG00000033417	ENSSSCG00000033417	7.53864	CD21pB	1593.07	1.15467	5.6628	1.48926e-08	2.51467e-07
ENSSSCG00000037921	ENSSSCG00000037921	7.53812	CD21pB	544.6	0.440576	14.8399	8.08407e-50	3.135e-47
ENSSSCG00000015238	ARHGAP32	7.53751	Myeloid	224.8	0.632201	10.3409	4.60333e-25	1.046e-23	Rho GTPase activating protein 32 [Source:HGNC Symbol;Acc:HGNC:17399]
ENSSSCG00000008032	ENSSSCG00000008032	7.51923	CD21nB	423.8	0.558912	11.6641	1.94348e-31	2.8263e-29	tryptase precursor [Source:RefSeq peptide;Acc:NP_998959]
ENSSSCG00000035276	GAPT	7.53178	Myeloid	128.333	1.01989	6.40439	1.50971e-10	1.3049e-09	GRB2 binding adaptor protein, transmembrane [Source:HGNC Symbol;Acc:HGNC:26588]
ENSSSCG00000008213	CD8B	7.52844	CD8T	3285.47	0.393327	16.598	7.20507e-62	1.02744e-58	T-cell surface glycoprotein CD8 beta chain precursor [Source:RefSeq peptide;Acc:NP_1335699]
ENSSSCG00000040363	ENSSSCG00000040363	7.52772	CD21pB	168.067	0.64315	10.1496	3.32723e-24	2.22465e-22
ENSSSCG00000037736	ENSSSCG00000037736	7.52676	CD21pB	218.6	0.617048	10.5774	3.79409e-26	2.92321e-24
ENSSSCG00000001978	GZMB	7.52012	NK	5831.4	0.754786	8.63837	5.70214e-18	8.3973e-16	granzyme B precursor [Source:RefSeq peptide;Acc:NP_1137182]
ENSSSCG00000038282	ENSSSCG00000038282	7.49372	CD21nB	101.667	0.697567	9.30909	1.28926e-20	9.31634e-19
ENSSSCG00000013074	RAB3IL1	7.50887	Myeloid	50.7333	1.0598	6.14163	8.16806e-10	6.58539e-09	RAB3A interacting protein like 1 [Source:HGNC Symbol;Acc:HGNC:978]
ENSSSCG00000040651	ENSSSCG00000040651	7.50806	CD21pB	2113.4	1.31525	4.94816	7.49193e-07	9.73879e-06
ENSSSCG00000013237	SPI1	7.50761	Myeloid	3967.47	0.444772	14.6313	1.77276e-48	1.17184e-46	transcription factor PU.1 [Source:RefSeq peptide;Acc:NP_11865]
ENSSSCG00000003881	SPATA6	7.50508	Myeloid	43.8	1.30023	5.00302	5.64377e-07	3.35855e-06	spermatogenesis-associated protein 6 [Source:RefSeq peptide;Acc:NP_1171388]
ENSSSCG00000005751	COL5A1	7.49858	Myeloid	20.6667	1.4419	4.50694	6.57688e-06	3.41282e-05	collagen alpha-1(V) chain precursor [Source:RefSeq peptide;Acc:NP_114971]
ENSSSCG00000031248	ENSSSCG00000031248	7.4917	CD21nB	294.8	1.41019	4.60341	4.15638e-06	5.58376e-05
ENSSSCG00000031502	ENSSSCG00000031502	7.45664	CD21nB	271.467	0.466317	13.846	1.34441e-43	3.81483e-41
ENSSSCG00000014136	VCAN	7.48501	Myeloid	5261.2	0.217698	29.7891	5.41472e-195	6.29948e-191	versican core protein precursor [Source:RefSeq peptide;Acc:NP_1193358]
ENSSSCG00000032810	GZMM	7.47836	NK	626.333	1.00967	6.41632	1.39607e-10	6.71153e-09	granzyme M precursor [Source:RefSeq peptide;Acc:NP_1137184]
ENSSSCG00000036086	PAX5	7.47265	CD21pB	4561.33	0.571692	11.3219	1.02222e-29	9.59069e-28	paired box 5 [Source:HGNC Symbol;Acc:HGNC:8619]
ENSSSCG00000008796	RBM47	7.47067	Myeloid	206.733	0.529503	12.2203	2.42278e-34	8.97662e-33	RNA binding motif protein 47 [Source:HGNC Symbol;Acc:HGNC:3358]
ENSSSCG00000029295	BPIFB4	7.46599	SWC6gdT	138.4	1.24485	5.19421	2.05594e-07	3.26905e-06	BPI fold containing family B member 4 [Source:HGNC Symbol;Acc:HGNC:16179]
ENSSSCG00000038453	SYNPO	7.46328	NK	237.4	0.52867	12.2256	2.27034e-34	1.39017e-31	synaptopodin [Source:HGNC Symbol;Acc:HGNC:3672]
ENSSSCG00000007977	HBM	7.42561	CD21nB	85.8	2.48675	2.58394	0.00976795	0.0467463	hemoglobin subunit mu [Source:HGNC Symbol;Acc:HGNC:4826]
ENSSSCG00000037009	ENSSSCG00000037009	7.45587	CD21pB	3982.2	0.618625	10.4358	1.701e-25	1.22916e-23
ENSSSCG00000000717	KCNA6	7.44889	SWC6gdT	29.0667	1.92071	3.35755	0.000786371	0.00407693	potassium voltage-gated channel subfamily A member 6 [Source:HGNC Symbol;Acc:HGNC:6225]
ENSSSCG00000016130	ZDBF2	7.43756	CD21pB	20.4	1.92216	3.34913	0.000810672	0.00508826	zinc finger DBF-type containing 2 [Source:HGNC Symbol;Acc:HGNC:29313]
ENSSSCG00000003275	ENSSSCG00000003275	7.43466	Myeloid	27.4	1.35434	4.75115	2.02259e-06	1.12642e-05
ENSSSCG00000029879	LTF	7.43137	Myeloid	27.5333	1.44321	4.45631	8.33831e-06	4.26034e-05	lactotransferrin precursor [Source:RefSeq peptide;Acc:NP_999527]
ENSSSCG00000021006	ENSSSCG00000021006	7.42688	NK	7454	0.839899	7.65197	1.97922e-14	1.66857e-12
ENSSSCG00000040845	AGPAT2	7.42657	Myeloid	275.467	0.42247	15.2119	2.94805e-52	2.41532e-50	1-acyl-sn-glycerol-3-phosphate acyltransferase beta precursor [Source:RefSeq peptide;Acc:NP_11246]
ENSSSCG00000031150	ENSSSCG00000031150	7.42512	CD21nB	597.333	1.87514	3.42648	0.000611459	0.00462943
ENSSSCG00000032419	ENSSSCG00000032419	7.4232	CD21nB	256.133	0.8004	8.02498	1.01539e-15	4.9844e-14
ENSSSCG00000001672	CRIP3	7.41004	CD21nB	107.8	0.833751	7.68819	1.49231e-14	6.40649e-13	cysteine rich protein 3 [Source:HGNC Symbol;Acc:HGNC:17751]
ENSSSCG00000008336	ANXA4	7.42125	Myeloid	703.6	0.453575	14.157	1.69096e-45	9.64343e-44	annexin A4 [Source:RefSeq peptide;Acc:NP_1161111]
ENSSSCG00000026145	RAG1	7.42052	NK	163.8	0.976158	6.57733	4.78957e-11	2.53281e-09	V(D)J recombination-activating protein 1 [Source:RefSeq peptide;Acc:NP_1116656]
ENSSSCG00000010271	PRF1	7.41554	NK	2557.67	0.627102	10.2305	1.44836e-24	4.68061e-22	perforin 1 [Source:HGNC Symbol;Acc:HGNC:936]
ENSSSCG00000022676	OPHN1	7.41229	Myeloid	63.4	0.946581	6.77415	1.25136e-11	1.2002e-10	oligophrenin 1 [Source:HGNC Symbol;Acc:HGNC:8148]
ENSSSCG00000013869	CPAMD8	7.38483	CD21nB	53.2667	3.02508	2.11063	0.0348038	0.125592	C3 and PZP like, alpha-2-macroglobulin domain containing 8 [Source:HGNC Symbol;Acc:HGNC:23228]
ENSSSCG00000030775	ENSSSCG00000030775	7.39924	CD21pB	5627.73	0.423146	15.123	1.14197e-51	4.58128e-49
ENSSSCG00000017738	ADAP2	7.39909	Myeloid	109.733	0.729425	8.77279	1.74286e-18	2.70714e-17	arf-GAP with dual PH domain-containing protein 2 [Source:RefSeq peptide;Acc:NP_1182252]
ENSSSCG00000009115	NDST3	7.39678	CD4T	40.4667	0.8795	7.27321	3.51056e-13	1.88908e-11	N-deacetylase and N-sulfotransferase 3 [Source:HGNC Symbol;Acc:HGNC:7682]
ENSSSCG00000034568	RNASE4	7.39268	Myeloid	352.6	0.547756	11.6707	1.80015e-31	5.93285e-30
ENSSSCG00000039804	ENSSSCG00000039804	7.39186	CD21pB	2146.53	1.48319	4.30953	1.63605e-05	0.000162682
ENSSSCG00000035078	CD40	7.38998	CD21pB	2002.53	0.439255	14.5473	6.073e-48	2.07804e-45	Tumor necrosis factor receptor superfamily member 5 [Source:UniProtKB/Swiss-Prot;Acc:Q8SQ34]
ENSSSCG00000005922	ENSSSCG00000005922	7.38869	Myeloid	28.7333	1.17419	5.44093	5.30023e-08	3.58923e-07
ENSSSCG00000003950	TIE1	7.38644	Myeloid	569.867	0.347531	18.3766	2.02298e-75	4.05783e-73	tyrosine kinase with immunoglobulin like and EGF like domains 1 [Source:HGNC Symbol;Acc:HGNC:1189]
ENSSSCG00000006233	CA8	7.37159	CD21nB	559.133	0.405693	15.7054	1.38822e-55	8.97254e-53	carbonic anhydrase 8 [Source:HGNC Symbol;Acc:HGNC:1382]
ENSSSCG00000039804	ENSSSCG00000039804	7.38265	NK	2146.53	2.07914	3.06986	0.00214163	0.0171526
ENSSSCG00000004236	PKIB	7.38264	Myeloid	183.267	0.580299	10.9989	3.86884e-28	1.04675e-26	cAMP-dependent protein kinase inhibitor beta [Source:HGNC Symbol;Acc:HGNC:918]
ENSSSCG00000032963	IFNG	7.37445	NK	106.4	1.16384	5.47708	4.32407e-08	1.27036e-06	Interferon gamma [Source:UniProtKB/Swiss-Prot;Acc:P1783]
ENSSSCG00000035171	ENSSSCG00000035171	7.35613	CD21nB	557.2	1.47169	4.31895	1.56775e-05	0.000184421
ENSSSCG00000022057	ENSSSCG00000022057	7.36907	SWC6gdT	195.8	1.00953	6.30897	2.8089e-10	8.27309e-09
ENSSSCG00000007807	CD19	7.36885	CD21pB	3128.87	0.341507	18.6492	1.28089e-77	1.49019e-74	B-lymphocyte antigen CD19 precursor [Source:RefSeq peptide;Acc:NP_999542]
ENSSSCG00000012557	ENSSSCG00000012557	7.36783	NK	60.8667	1.57052	4.05461	5.02182e-05	0.000699687
ENSSSCG00000031788	PTAFR	7.36504	Myeloid	410.4	0.4919	12.9397	2.68634e-38	1.17492e-36	platelet activating factor receptor [Source:HGNC Symbol;Acc:HGNC:9582]
ENSSSCG00000009002	TLR2	7.36499	Myeloid	1105.07	0.334833	19.0094	1.42485e-80	3.60363e-78	toll-like receptor 2 precursor [Source:RefSeq peptide;Acc:NP_998926]
ENSSSCG00000037141	ENSSSCG00000037141	7.36381	NK	7474.6	1.20197	5.2945	1.19341e-07	3.19176e-06
ENSSSCG00000016901	GZMK	7.35984	CD8T	741.267	0.629434	10.1041	5.2995e-24	5.54649e-22	granzyme K precursor [Source:RefSeq peptide;Acc:NP_1137183]
ENSSSCG00000017283	CD79B	7.30255	CD21nB	9910.53	0.319947	19.6987	2.21135e-86	8.57563e-83	B-cell antigen receptor complex-associated protein beta chain precursor [Source:RefSeq peptide;Acc:NP_123841]
ENSSSCG00000038204	ENSSSCG00000038204	7.35492	CD21pB	603	0.496301	12.8046	1.54554e-37	2.60592e-35
ENSSSCG00000005191	MPDZ	7.34912	CD21pB	103.133	0.748563	8.48175	2.21832e-17	9.1843e-16	multiple PDZ domain crumbs cell polarity complex component [Source:HGNC Symbol;Acc:HGNC:728]
ENSSSCG00000031037	ENSSSCG00000031037	7.34096	CD21pB	9806.53	0.47652	13.3068	2.11327e-40	4.16708e-38
ENSSSCG00000032582	ENSSSCG00000032582	7.3398	CD21pB	8017.53	0.48963	12.9481	2.40688e-38	4.37526e-36
ENSSSCG00000039956	ENSSSCG00000039956	7.33925	Myeloid	401.6	0.377204	16.8059	2.20971e-63	2.88852e-61
ENSSSCG00000039175	MARCH11	7.3364	Myeloid	1844.53	0.364422	17.3875	1.02546e-67	1.52951e-65	membrane associated ring-CH-type finger 1 [Source:HGNC Symbol;Acc:HGNC:2677]
ENSSSCG00000036628	ENSSSCG00000036628	7.33441	CD21pB	71.4667	3.82507	1.65603	0.0977167	0.255814
ENSSSCG00000039111	ENSSSCG00000039111	7.33299	CD21pB	3019	0.5639	11.2307	2.88169e-29	2.61918e-27
ENSSSCG00000006413	FCER1A	7.33112	SWC6gdT	693.6	0.662989	9.54936	1.30506e-21	2.76055e-19	Fc fragment of IgE receptor Ia [Source:HGNC Symbol;Acc:HGNC:369]
ENSSSCG00000037383	ENSSSCG00000037383	7.32546	NK	15.6	2.35892	2.68151	0.00732913	0.0460817
ENSSSCG00000026707	XCR1	7.32302	Myeloid	111.067	0.651753	9.70155	2.96944e-22	5.76736e-21	chemokine XC receptor 1 [Source:RefSeq peptide;Acc:NP_11622]
ENSSSCG00000032499	ENSSSCG00000032499	7.32214	CD21pB	180.467	4.1324	1.5299	0.126042	0.308711
ENSSSCG00000040057	EOMES	7.31912	CD8T	876.8	0.340204	18.5745	5.16792e-77	2.94778e-73	eomesodermin [Source:HGNC Symbol;Acc:HGNC:3372]
ENSSSCG00000036036	XG	7.31364	Myeloid	105.133	0.838983	7.52535	5.25781e-14	6.02654e-13	Xg blood group [Source:HGNC Symbol;Acc:HGNC:1286]
ENSSSCG00000035542	ENSSSCG00000035542	7.30801	CD21pB	91.4	3.78613	1.66609	0.0956965	0.251999
ENSSSCG00000033955	ENSSSCG00000033955	7.27073	CD21nB	41.3333	3.88327	1.6148	0.106353	0.296433
ENSSSCG00000040826	ENSSSCG00000040826	7.30178	Myeloid	27.4	1.28138	4.91798	8.74415e-07	5.09156e-06
ENSSSCG00000016570	TSPAN33	7.30046	Myeloid	255.867	0.366789	17.1774	3.92307e-66	5.70513e-64	tetraspanin 33 [Source:HGNC Symbol;Acc:HGNC:28743]
ENSSSCG00000033797	ENSSSCG00000033797	7.29742	CD21pB	556.267	1.66414	3.78418	0.000154217	0.0012172
ENSSSCG00000039056	GAS7	7.29198	NK	1530.93	0.616098	10.2126	1.74093e-24	5.41673e-22	growth arrest specific 7 [Source:HGNC Symbol;Acc:HGNC:4169]
ENSSSCG00000011609	FBLN2	7.29167	SWC6gdT	381.6	0.92979	6.76677	1.31692e-11	5.0398e-10	fibulin 2 [Source:HGNC Symbol;Acc:HGNC:361]
ENSSSCG00000039490	ENSSSCG00000039490	7.28996	CD21pB	219.667	0.556928	11.294	1.40443e-29	1.30713e-27
ENSSSCG00000015907	GALNT3	7.28047	Myeloid	111.533	0.773558	8.11894	4.70261e-16	6.20297e-15	polypeptide N-acetylgalactosaminyltransferase 3 [Source:HGNC Symbol;Acc:HGNC:4125]
ENSSSCG00000028552	BHLHE41	7.27639	CD21pB	650.333	0.390405	16.0766	3.72279e-58	2.40616e-55	basic helix-loop-helix family member e41 [Source:HGNC Symbol;Acc:HGNC:16617]
ENSSSCG00000033225	ENSSSCG00000033225	7.27633	NK	863	2.12651	2.95147	0.00316269	0.0234331
ENSSSCG00000034920	ENSSSCG00000034920	7.27524	Myeloid	33.9333	1.11273	5.63952	1.70524e-08	1.22009e-07
ENSSSCG00000027998	ENSSSCG00000027998	7.27492	CD21pB	222.6	0.982723	6.38524	1.71125e-10	3.67319e-09
ENSSSCG00000037878	AHSP	7.14057	CD21nB	67.2	1.04655	5.86746	4.42513e-09	1.02147e-07	alpha hemoglobin stabilizing protein [Source:HGNC Symbol;Acc:HGNC:1875]
ENSSSCG00000020813	FAM2C	7.26277	Myeloid	389.6	0.468708	13.3618	1.01146e-40	4.98615e-39	FAM2C, golgi associated secretory pathway kinase [Source:HGNC Symbol;Acc:HGNC:2214]
ENSSSCG00000039393	SPRED1	7.26194	Myeloid	84.7333	0.715739	8.74891	2.15415e-18	3.33263e-17	sprouty related EVH1 domain containing 1 [Source:HGNC Symbol;Acc:HGNC:2249]
ENSSSCG00000004497	PSTPIP2	7.25832	NK	1433.6	0.874106	7.15968	8.08659e-13	5.40686e-11	proline-serine-threonine phosphatase interacting protein 2 [Source:HGNC Symbol;Acc:HGNC:9581]
ENSSSCG00000013655	ICAM1	7.25546	Myeloid	612.867	0.405155	15.4397	8.85428e-54	7.63042e-52	intercellular adhesion molecule 1 precursor [Source:RefSeq peptide;Acc:NP_998981]
ENSSSCG00000009053	RNF15	7.25322	CD21pB	72.0667	0.970378	6.44411	1.16282e-10	2.55249e-09	ring finger protein 15 [Source:HGNC Symbol;Acc:HGNC:23138]
ENSSSCG00000040381	ENSSSCG00000040381	7.24545	NK	2714.47	0.631104	9.89606	4.33003e-23	1.17153e-20
ENSSSCG00000028711	CASP1	7.23677	Myeloid	2186.2	0.613541	10.1652	2.83542e-24	6.16585e-23	caspase-1 [Source:RefSeq peptide;Acc:NP_999327]
ENSSSCG00000024043	ADAMTS2	7.23637	Myeloid	62.6667	0.776384	8.03259	9.54375e-16	1.23506e-14	ADAM metallopeptidase with thrombospondin type 1 motif 2 [Source:HGNC Symbol;Acc:HGNC:218]
ENSSSCG00000040651	ENSSSCG00000040651	7.23203	NK	2113.4	1.84556	3.37677	0.000733426	0.00702856
ENSSSCG00000034356	ENSSSCG00000034356	7.22827	CD21pB	23.8667	1.55157	4.01418	5.96527e-05	0.000530175
ENSSSCG00000014430	ABLIM3	7.21437	SWC6gdT	477.6	0.9038	6.87583	6.16313e-12	2.51586e-10	actin binding LIM protein family member 3 [Source:HGNC Symbol;Acc:HGNC:29132]
ENSSSCG00000006087	CPQ	7.21401	Myeloid	37.5333	1.34775	4.61064	4.01424e-06	2.1472e-05	carboxypeptidase Q precursor [Source:RefSeq peptide;Acc:NP_12362]
ENSSSCG00000008217	CD8A	7.20878	CD8T	7257.87	0.345132	17.9896	2.35257e-72	8.94603e-69	T-cell surface glycoprotein CD8 alpha chain precursor [Source:RefSeq peptide;Acc:NP_1197]
ENSSSCG00000022337	SERPINB11	7.20762	Myeloid	24.2667	1.33379	4.65413	3.25358e-06	1.76057e-05	serpin family B member 11 (gene/pseudogene) [Source:HGNC Symbol;Acc:HGNC:14221]
ENSSSCG00000008171	NPAS2	7.20497	CD4CD8T	113.933	0.676651	9.17012	4.72475e-20	8.08349e-18	neuronal PAS domain protein 2 [Source:HGNC Symbol;Acc:HGNC:7895]
ENSSSCG00000031538	ANG	7.20411	Myeloid	285.733	0.555692	11.1647	6.07294e-29	1.73168e-27	angiogenin [Source:HGNC Symbol;Acc:HGNC:483]
ENSSSCG00000009482	SPRY2	7.20207	NK	126.933	1.10989	5.588	2.29701e-08	7.14531e-07	sprouty RTK signaling antagonist 2 [Source:HGNC Symbol;Acc:HGNC:1127]
ENSSSCG00000009429	TNFSF11	7.19879	SWC6gdT	365.333	0.904405	6.85399	7.18166e-12	2.87118e-10	TNF superfamily member 11 [Source:HGNC Symbol;Acc:HGNC:11926]
ENSSSCG00000022675	NCR1	7.19503	NK	279.067	1.1835	5.23452	1.65411e-07	4.28595e-06	natural cytotoxicity triggering receptor 1 precursor [Source:RefSeq peptide;Acc:NP_1116615]
ENSSSCG00000037913	ENSSSCG00000037913	7.19143	CD21pB	1726.4	0.536903	11.5318	9.12623e-31	9.31356e-29
ENSSSCG00000033417	ENSSSCG00000033417	7.19062	NK	1593.07	1.61839	3.82517	0.000130683	0.00161741
ENSSSCG00000015413	FGL2	7.18796	NK	5685.4	0.432772	14.2984	2.23847e-46	2.89359e-43	fibroleukin precursor [Source:RefSeq peptide;Acc:NP_15152]
ENSSSCG00000031746	KCNQ2	7.18621	NK	19.8	2.71169	2.28131	0.02253	0.112094	potassium voltage-gated channel subfamily Q member 2 [Source:HGNC Symbol;Acc:HGNC:6296]
ENSSSCG00000013337	BBOX1	7.1849	CD21pB	181.467	0.940873	6.57358	4.9119e-11	1.12144e-09	gamma-butyrobetaine hydroxylase 1 [Source:HGNC Symbol;Acc:HGNC:964]
ENSSSCG00000017956	CD68	7.18222	Myeloid	318.8	0.379208	16.303	9.3985e-60	1.07198e-57	macrosialin precursor [Source:RefSeq peptide;Acc:NP_127875]
ENSSSCG00000035379	JCHAIN	7.17436	CD21pB	13572.9	0.523335	11.7981	3.99195e-32	4.69114e-30	joining chain of multimeric IgA and IgM [Source:HGNC Symbol;Acc:HGNC:5713]
ENSSSCG00000034062	SV2C	7.17106	CD4CD8T	19.4667	1.56901	3.9331	8.38575e-05	0.000877227	synaptic vesicle glycoprotein 2C [Source:HGNC Symbol;Acc:HGNC:367]
ENSSSCG00000037074	ENSSSCG00000037074	7.16923	NK	18.8	2.35326	2.62157	0.00875268	0.0526791
ENSSSCG00000033175	SASH1	7.1685	Myeloid	160.867	0.574096	10.7447	6.27474e-27	1.5532e-25	SAM and SH3 domain containing 1 [Source:HGNC Symbol;Acc:HGNC:19182]
ENSSSCG00000037402	ENSSSCG00000037402	7.16274	CD21pB	827.867	0.493308	12.4927	8.18594e-36	1.13375e-33
ENSSSCG00000032679	ENSSSCG00000032679	7.16213	CD21pB	1588.87	1.1545	5.33747	9.4252e-08	1.4167e-06
ENSSSCG00000031848	ENSSSCG00000031848	7.16096	CD21pB	373.533	0.802125	7.6808	1.58102e-14	5.09518e-13
ENSSSCG00000003760	TTLL7	7.1564	Myeloid	47.5333	0.875431	7.03243	2.0297e-12	2.05693e-11	tubulin tyrosine ligase like 7 [Source:HGNC Symbol;Acc:HGNC:26242]
ENSSSCG00000016365	ANKMY1	7.15405	SWC6gdT	15.9333	1.57452	3.90851	9.28659e-05	0.000671474	ankyrin repeat and MYND domain containing 1 [Source:HGNC Symbol;Acc:HGNC:2987]
ENSSSCG00000003731	GAREM1	7.15298	CD21pB	1752.33	0.451196	13.6371	2.41064e-42	5.60907e-40	GRB2 associated regulator of MAPK1 subtype 1 [Source:HGNC Symbol;Acc:HGNC:26136]
ENSSSCG00000034169	ENSSSCG00000034169	7.14832	CD4CD8T	157.733	0.553269	11.1127	1.088e-28	3.42104e-26
ENSSSCG00000004584	GCNT3	7.14165	Myeloid	43.2	1.15337	5.32497	1.00967e-07	6.6066e-07	glucosaminyl (N-acetyl) transferase 3, mucin type [Source:HGNC Symbol;Acc:HGNC:425]
ENSSSCG00000033808	ENSSSCG00000033808	7.10323	CD21nB	65.2667	0.905738	6.73841	1.60133e-11	5.17496e-10
ENSSSCG00000008866	GUCY1A1	7.14018	Myeloid	70.4667	0.822677	7.46365	8.41551e-14	9.50544e-13	guanylate cyclase soluble subunit alpha-3 [Source:RefSeq peptide;Acc:NP_11843]
ENSSSCG00000028274	FAM131B	7.13784	CD21pB	326.4	0.360682	17.0173	6.11104e-65	4.73972e-62	family with sequence similarity 131 member B [Source:HGNC Symbol;Acc:HGNC:2222]
ENSSSCG00000004199	EPB41L2	7.13698	Myeloid	2134.93	0.326927	18.7717	1.28648e-78	2.87826e-76	erythrocyte membrane protein band 4.1 like 2 [Source:HGNC Symbol;Acc:HGNC:3379]
ENSSSCG00000004490	SETBP1	7.13395	CD21pB	64	0.839394	7.30759	2.71972e-13	7.83199e-12	SET binding protein 1 [Source:HGNC Symbol;Acc:HGNC:15573]
ENSSSCG00000027505	ESYT3	7.13282	Myeloid	27.5333	1.28437	4.77495	1.79755e-06	1.00542e-05	extended synaptotagmin 3 [Source:HGNC Symbol;Acc:HGNC:24295]
ENSSSCG00000002039	MMP14	7.13224	Myeloid	25.8667	1.38428	4.42992	9.42679e-06	4.77663e-05	matrix metallopeptidase 14 [Source:HGNC Symbol;Acc:HGNC:716]
ENSSSCG00000003331	TNFRSF4	7.12755	CD4T	560.133	1.31288	4.66727	3.05235e-06	4.47574e-05	TNF receptor superfamily member 4 [Source:HGNC Symbol;Acc:HGNC:11918]
ENSSSCG00000007973	IL9R	7.12647	SWC6gdT	536.8	0.846755	7.23523	4.64727e-13	2.44644e-11	interleukin 9 receptor [Source:HGNC Symbol;Acc:HGNC:63]
ENSSSCG00000013114	SLC15A3	7.11625	Myeloid	1255.33	0.595833	10.265	1.01276e-24	2.25286e-23	solute carrier family 15 member 3 [Source:HGNC Symbol;Acc:HGNC:1868]
ENSSSCG00000038871	ENSSSCG00000038871	7.11329	CD21pB	92.4667	0.788331	7.75473	8.85344e-15	2.9598e-13
ENSSSCG00000032857	S1A12	7.11127	Myeloid	594.8	0.36671	16.6651	2.34902e-62	2.97049e-60	Protein S1-A12 [Source:UniProtKB/Swiss-Prot;Acc:P831]
ENSSSCG00000014149	MEF2C	7.10677	CD21pB	2813.4	0.573001	10.6575	1.60824e-26	1.27281e-24	myocyte-specific enhancer factor 2C [Source:RefSeq peptide;Acc:NP_1385]
ENSSSCG00000034426	ENSSSCG00000034426	7.10504	CD21pB	167.8	0.62105	9.83019	8.34644e-23	5.11065e-21
ENSSSCG00000027796	SLC22A7	7.06793	CD21nB	349.267	0.548553	11.0617	1.92386e-28	2.19433e-26	Solute carrier family 22 member 7 [Source:UniProtKB/Swiss-Prot;Acc:Q1RPP5]
ENSSSCG00000036983	ENSSSCG00000036983	7.09273	NK	4394.6	1.38707	4.39251	1.12051e-05	0.000192271
ENSSSCG00000010647	ADRB1	7.08964	NK	12.4	3.08199	1.97588	0.0481687	0.196423	beta-1 adrenergic receptor [Source:RefSeq peptide;Acc:NP_1116546]
ENSSSCG00000009357	SMAD9	7.08409	Myeloid	27.3333	1.34042	4.53895	5.65341e-06	2.97072e-05	mothers against decapentaplegic homolog 9 [Source:RefSeq peptide;Acc:NP_1182439]
ENSSSCG00000039391	ENSSSCG00000039391	7.08334	CD21pB	439.6	0.710164	8.56609	1.07054e-17	4.57892e-16
ENSSSCG00000021624	LAD1	7.08087	Myeloid	37.3333	1.26824	4.79473	1.62897e-06	9.15527e-06	ladinin 1 [Source:HGNC Symbol;Acc:HGNC:6472]
ENSSSCG00000025602	DOCK4	7.07665	Myeloid	302.733	0.588416	10.3271	5.31295e-25	1.20255e-23	dedicator of cytokinesis 4 [Source:HGNC Symbol;Acc:HGNC:19192]
ENSSSCG00000038418	ENSSSCG00000038418	7.07199	Myeloid	114.667	0.934136	6.50011	8.02598e-11	7.1278e-10
ENSSSCG00000000588	PLEKHA5	7.07004	Myeloid	127.8	0.629905	9.63643	5.61058e-22	1.07535e-20	pleckstrin homology domain containing A5 [Source:HGNC Symbol;Acc:HGNC:336]
ENSSSCG00000010077	ENSSSCG00000010077	7.06986	Myeloid	597.8	0.802754	7.5613	3.9906e-14	4.61957e-13
ENSSSCG00000017896	SCIMP	7.05851	CD21nB	1435.27	0.465862	13.0049	1.14702e-38	2.22407e-36	SLP adaptor and CSK interacting membrane protein [Source:HGNC Symbol;Acc:HGNC:3354]
ENSSSCG00000008134	EDAR	7.06588	CD4T	92.4667	0.595982	10.1779	2.48756e-24	4.36585e-22	ectodysplasin A receptor [Source:HGNC Symbol;Acc:HGNC:2895]
ENSSSCG00000035870	ENSSSCG00000035870	7.0629	CD4CD8T	490.467	2.06696	2.93324	0.00335441	0.0201161
ENSSSCG00000030433	ENSSSCG00000030433	7.06187	Myeloid	23.9333	4.22936	1.43328	0.151777	0.330051
ENSSSCG00000013777	CLEC17A	7.00333	CD21nB	2281.4	0.559146	10.7366	6.85203e-27	6.99268e-25	C-type lectin domain containing 17A [Source:HGNC Symbol;Acc:HGNC:3452]
ENSSSCG00000036654	ENSSSCG00000036654	7.05421	CD21pB	185.867	0.689736	8.77758	1.67036e-18	7.93183e-17
ENSSSCG00000036342	ENSSSCG00000036342	7.04309	Myeloid	183.067	0.552626	10.9352	7.82102e-28	2.05859e-26
ENSSSCG00000006344	ENSSSCG00000006344	7.04219	Myeloid	24.4	1.18133	5.11473	3.14184e-07	1.94014e-06
ENSSSCG00000036224	ENSSSCG00000036224	7.03943	CD21pB	17293	0.50984	11.8457	2.26405e-32	2.71546e-30
ENSSSCG00000015413	FGL2	7.03887	Myeloid	5685.4	0.310011	19.4796	1.63693e-84	4.76102e-82	fibroleukin precursor [Source:RefSeq peptide;Acc:NP_15152]
ENSSSCG00000009829	CCDC63	7.03758	SWC6gdT	287.667	0.753173	8.0162	1.09069e-15	8.75112e-14	coiled-coil domain containing 63 [Source:HGNC Symbol;Acc:HGNC:26669]
ENSSSCG00000039111	ENSSSCG00000039111	7.03521	NK	3019	0.793651	7.60436	2.86322e-14	2.34583e-12
ENSSSCG00000029304	STEAP3	7.03412	Myeloid	618.867	0.459409	13.1345	2.08787e-39	9.75512e-38	STEAP3 metalloreductase [Source:HGNC Symbol;Acc:HGNC:24592]
ENSSSCG00000006788	ADORA3	7.03303	Myeloid	48	0.848849	7.10731	1.18326e-12	1.22148e-11	transmembrane and immunoglobulin domain containing 3 isoform 3 [Source:RefSeq peptide;Acc:NP_12897]
ENSSSCG00000015930	DHRS9	7.03216	Myeloid	1062.8	0.277346	21.7496	6.9702e-105	4.26797e-102	dehydrogenase/reductase 9 [Source:HGNC Symbol;Acc:HGNC:16888]
ENSSSCG00000007058	PLCB4	7.0286	Myeloid	61.5333	0.637791	9.45231	3.31441e-21	6.10125e-20	phospholipase C beta 4 [Source:HGNC Symbol;Acc:HGNC:959]
ENSSSCG00000009748	RIMBP2	7.02283	CD4T	86.2667	0.616587	9.76801	1.5445e-22	2.31837e-20	RIMS binding protein 2 [Source:HGNC Symbol;Acc:HGNC:3339]
ENSSSCG00000005250	APBA1	7.01995	Myeloid	339	0.568647	10.5864	3.44407e-26	8.19392e-25	amyloid beta precursor protein binding family A member 1 [Source:HGNC Symbol;Acc:HGNC:578]
ENSSSCG00000032163	ENSSSCG00000032163	7.00902	CD21pB	854.933	0.456456	13.1645	1.40402e-39	2.59275e-37
ENSSSCG00000017164	TIMP2	7.00849	Myeloid	3151.47	0.31941	18.8112	6.11155e-79	1.39415e-76	metalloproteinase inhibitor 2 precursor [Source:RefSeq peptide;Acc:NP_1139457]
ENSSSCG00000037837	ENSSSCG00000037837	7.00747	CD21pB	229.133	2.33034	2.57793	0.00993937	0.042357
ENSSSCG00000031023	ENSSSCG00000031023	6.99808	CD21nB	2523.07	0.523305	11.4619	2.04938e-30	2.74052e-28
ENSSSCG00000006811	SLC6A17	7.00093	CD4T	197.733	1.01619	5.9053	3.52006e-09	9.40441e-08	solute carrier family 6 member 17 [Source:HGNC Symbol;Acc:HGNC:31399]
ENSSSCG00000038871	ENSSSCG00000038871	6.97322	CD21nB	92.4667	0.788525	7.57518	3.58618e-14	1.50078e-12
ENSSSCG00000032700	ENSSSCG00000032700	6.99627	CD21pB	781.467	0.487434	12.3017	8.86729e-35	1.14625e-32
ENSSSCG00000038719	ENSSSCG00000038719	6.99237	NK	5433.87	0.848569	7.06174	1.64428e-12	1.05107e-10
ENSSSCG00000006651	ADAMTSL4	6.98791	Myeloid	349.333	0.493998	12.1213	8.14311e-34	2.95131e-32	ADAMTS like 4 [Source:HGNC Symbol;Acc:HGNC:1976]
ENSSSCG00000032434	PLAUR	6.98755	Myeloid	181.933	0.401609	14.9089	2.88403e-50	2.11024e-48	plasminogen activator, urokinase receptor [Source:HGNC Symbol;Acc:HGNC:953]
ENSSSCG00000016443	TMEM176A	6.98636	Myeloid	37.8667	1.0498	5.70235	1.18165e-08	8.62985e-08	transmembrane protein 176A [Source:HGNC Symbol;Acc:HGNC:2493]
ENSSSCG00000006298	XCL1	6.98007	NK	420.4	0.890361	6.71645	1.86201e-11	1.02667e-09	lymphotactin precursor [Source:RefSeq peptide;Acc:NP_1127817]
ENSSSCG00000035443	ENSSSCG00000035443	6.97561	CD21pB	2067.33	0.582406	10.2602	1.06477e-24	7.40933e-23
ENSSSCG00000034469	ENSSSCG00000034469	6.96556	CD21nB	241.8	2.01387	2.96224	0.00305409	0.0181838
ENSSSCG00000013147	FAM111B	6.96598	Myeloid	468.267	0.42141	14.1572	1.6864e-45	9.64343e-44	family with sequence similarity 111 member B [Source:HGNC Symbol;Acc:HGNC:242]
ENSSSCG00000003590	PTPRU	6.95307	CD21nB	17.7333	1.4923	3.98919	6.62994e-05	0.000668395	protein tyrosine phosphatase, receptor type U [Source:HGNC Symbol;Acc:HGNC:9683]
ENSSSCG00000039146	ENSSSCG00000039146	6.96537	CD21pB	2883.2	0.423695	14.0794	5.08507e-45	1.47899e-42
ENSSSCG00000000136	CSF2RB	6.96451	Myeloid	3544.4	0.409645	14.5602	5.03165e-48	3.25212e-46	colony stimulating factor 2 receptor beta common subunit [Source:HGNC Symbol;Acc:HGNC:2436]
ENSSSCG00000033813	ENSSSCG00000033813	6.96278	CD21pB	570.933	0.644922	9.24575	2.336e-20	1.24665e-18
ENSSSCG00000036810	ARL11	6.96172	Myeloid	108.533	0.509902	11.6919	1.40231e-31	4.64801e-30	ADP ribosylation factor like GTPase 11 [Source:HGNC Symbol;Acc:HGNC:2446]
ENSSSCG00000034211	ENSSSCG00000034211	6.93348	CD21nB	3951.07	0.415695	14.2736	3.19488e-46	1.09321e-43
ENSSSCG00000034842	ENSSSCG00000034842	6.9495	CD21pB	124.2	0.695635	8.55262	1.2033e-17	5.12791e-16
ENSSSCG00000038992	TUBB6	6.94461	NK	480.533	0.643412	9.23921	2.48334e-20	5.25295e-18	tubulin beta 6 class V [Source:HGNC Symbol;Acc:HGNC:2776]
ENSSSCG00000013842	ENSSSCG00000013842	6.94375	Myeloid	49.2	0.956032	6.21711	5.06402e-10	4.16359e-09
ENSSSCG00000023584	ENSSSCG00000023584	6.94173	NK	4545.2	0.400035	14.853	6.64928e-50	1.93394e-46
ENSSSCG00000037009	ENSSSCG00000037009	6.93946	NK	3982.2	0.865002	6.86642	6.58348e-12	3.88793e-10
ENSSSCG00000032419	ENSSSCG00000032419	6.93788	CD21pB	256.133	0.800645	7.41637	1.2037e-13	3.59995e-12
ENSSSCG00000029656	NDP	6.9371	CD4CD8T	28.6	1.42334	4.17124	3.02951e-05	0.00036112	norrin precursor [Source:RefSeq peptide;Acc:NP_116528]
ENSSSCG00000031282	ENSSSCG00000031282	6.93489	NK	455.533	1.79919	3.29865	0.000971508	0.00886473
ENSSSCG00000004057	SYTL3	6.93396	SWC6gdT	4826.27	0.645372	9.19464	3.76261e-20	6.07975e-18	synaptotagmin like 3 [Source:HGNC Symbol;Acc:HGNC:15587]
ENSSSCG00000012347	ALAS2	6.93212	CD21nB	435.333	0.897774	6.60759	3.90631e-11	1.20228e-09	5'-aminolevulinate synthase 2 [Source:HGNC Symbol;Acc:HGNC:397]
ENSSSCG00000033675	SPAI-2	6.92401	CD21nB	12.7333	1.99511	2.96927	0.00298506	0.0178367	Sus scrofa elafin family member (WAP-3), mRNA. [Source:RefSeq mRNA;Acc:NM_126553]
ENSSSCG00000032612	MILR1	6.93202	Myeloid	1427.2	0.518546	11.4397	2.64764e-30	8.08469e-29	mast cell immunoglobulin like receptor 1 [Source:HGNC Symbol;Acc:HGNC:2757]
ENSSSCG00000022194	ENSSSCG00000022194	6.92974	Myeloid	43.6667	0.925038	6.41026	1.45269e-10	1.26075e-09
ENSSSCG00000034766	ENSSSCG00000034766	6.9268	CD21pB	7307.2	0.563317	10.5213	6.89502e-26	5.10934e-24
ENSSSCG00000010312	PLAU	6.92537	Myeloid	115.533	0.667171	8.88135	6.60558e-19	1.06292e-17	urokinase-type plasminogen activator precursor [Source:RefSeq peptide;Acc:NP_99911]
ENSSSCG00000040009	ENSSSCG00000040009	6.89766	CD21nB	169.267	0.672436	8.77058	1.77742e-18	1.08834e-16
ENSSSCG00000012112	ARHGAP6	6.92291	Myeloid	296.8	0.462607	12.8033	1.57074e-37	6.71836e-36	Rho GTPase activating protein 6 [Source:HGNC Symbol;Acc:HGNC:676]
ENSSSCG00000014825	RELT	6.91756	Myeloid	142.6	0.776005	7.62567	2.42769e-14	2.86739e-13	RELT, TNF receptor [Source:HGNC Symbol;Acc:HGNC:13764]
ENSSSCG00000029231	ENSSSCG00000029231	6.9141	Myeloid	989.333	1.09856	5.38349	7.30539e-08	4.86496e-07
ENSSSCG00000034285	RAG2	6.9134	NK	422.6	1.38754	4.26178	2.02808e-05	0.000319608	V(D)J recombination-activating protein 2 [Source:RefSeq peptide;Acc:NP_1121953]
ENSSSCG00000010504	BLNK	6.90885	Myeloid	2063.2	0.521625	11.3278	9.56009e-30	2.84455e-28	B cell linker [Source:HGNC Symbol;Acc:HGNC:14211]
ENSSSCG00000033238	ENSSSCG00000033238	6.90749	Myeloid	358.733	0.703395	8.39853	4.52104e-17	6.39098e-16
ENSSSCG00000003282	ENSSSCG00000003282	6.90363	Myeloid	654.6	0.698817	8.44803	2.96261e-17	4.23949e-16
ENSSSCG00000034023	ENSSSCG00000034023	6.90247	CD21pB	86.7333	4.22876	1.39579	0.162777	0.374037
ENSSSCG00000006958	TOP1MT	6.90136	NK	18.6667	2.48549	2.37433	0.0175808	0.0925081	DNA topoisomerase I mitochondrial [Source:HGNC Symbol;Acc:HGNC:29787]
ENSSSCG00000036324	ENSSSCG00000036324	6.90072	NK	279.8	2.79744	2.10933	0.034916	0.155876
ENSSSCG00000003684	MTCL1	6.89776	Myeloid	257.133	0.776238	7.59788	3.01023e-14	3.53747e-13	microtubule crosslinking factor 1 [Source:HGNC Symbol;Acc:HGNC:29121]
ENSSSCG00000004678	DUOX2	6.89396	CD21nB	114.2	1.32901	4.43485	9.21355e-06	0.000115882	dual oxidase 2 precursor [Source:RefSeq peptide;Acc:NP_999164]
ENSSSCG00000017355	GRN	6.89697	Myeloid	3129.4	0.532261	11.0791	1.58491e-28	4.34878e-27	granulins precursor [Source:RefSeq peptide;Acc:NP_13843]
ENSSSCG00000038667	ENSSSCG00000038667	6.8895	CD21nB	2330.4	1.94909	3.02167	0.00251385	0.0153385
ENSSSCG00000001723	PLA2G7	6.89187	Myeloid	465	0.346217	17.0178	6.05659e-65	8.38838e-63	platelet-activating factor acetylhydrolase isoform 1 precursor [Source:RefSeq peptide;Acc:NP_139735]
ENSSSCG00000001978	GZMB	6.89077	CD8T	5831.4	0.539072	10.9276	8.50527e-28	1.32915e-25	granzyme B precursor [Source:RefSeq peptide;Acc:NP_1137182]
ENSSSCG00000036127	ENSSSCG00000036127	6.8902	CD21pB	682.6	0.461996	12.7495	3.13865e-37	5.07153e-35
ENSSSCG00000033015	B3GNT7	6.88975	NK	131.733	0.816072	7.2172	5.30695e-13	3.69707e-11	UDP-GlcNAc:betaGal beta-1,3-N-acetylglucosaminyltransferase 7 [Source:HGNC Symbol;Acc:HGNC:18811]
ENSSSCG00000030172	CD4LG	6.8897	CD4T	970	0.408689	14.4112	4.39921e-47	5.57624e-44	CD4 ligand [Source:RefSeq peptide;Acc:NP_999291]
ENSSSCG00000000567	SOX5	6.88434	CD21nB	81.3333	0.708355	8.30705	9.8112e-17	5.11854e-15	SRY-box 5 [Source:HGNC Symbol;Acc:HGNC:1121]
ENSSSCG00000033574	CFAP54	6.88681	CD4CD8T	198.667	0.548935	10.7241	7.8485e-27	2.22706e-24	cilia and flagella associated protein 54 [Source:HGNC Symbol;Acc:HGNC:26456]
ENSSSCG00000034914	ENSSSCG00000034914	6.85538	CD21nB	6680.13	1.28318	4.56318	5.03841e-06	6.65345e-05	scavenger receptor cysteine-rich type 1 protein M16 precursor [Source:RefSeq peptide;Acc:NP_1116565]
ENSSSCG00000010739	CTBP2	6.88063	Myeloid	194.867	0.47176	12.4653	1.15435e-35	4.55245e-34	C-terminal binding protein 2 [Source:HGNC Symbol;Acc:HGNC:2495]
ENSSSCG00000031278	ENSSSCG00000031278	6.87902	SWC6gdT	801.067	0.753496	7.80233	6.07757e-15	4.15921e-13
ENSSSCG00000036612	TNFAIP2	6.87673	Myeloid	548.4	0.500649	11.7382	8.11646e-32	2.69791e-30	TNF alpha induced protein 2 [Source:HGNC Symbol;Acc:HGNC:11895]
ENSSSCG00000037402	ENSSSCG00000037402	6.86687	NK	827.867	0.673791	8.70725	3.11341e-18	4.96183e-16
ENSSSCG00000009545	COL4A2	6.86007	NK	31.1333	2.12902	2.75247	0.0059147	0.0387671	collagen type IV alpha 2 chain [Source:HGNC Symbol;Acc:HGNC:223]
ENSSSCG00000016655	GPR141	6.85787	NK	36.7333	1.26221	4.64098	3.46763e-06	6.9198e-05	G protein-coupled receptor 141 [Source:HGNC Symbol;Acc:HGNC:19997]
ENSSSCG00000033640	ENSSSCG00000033640	6.85637	CD21pB	599.6	2.25107	2.60159	0.00927922	0.039998
ENSSSCG00000034961	ENSSSCG00000034961	6.84242	CD21nB	65.6	0.903563	6.46598	1.00642e-10	2.96421e-09
ENSSSCG00000022536	SLC37A2	6.85524	Myeloid	687.067	0.508261	11.5201	1.04437e-30	3.25741e-29	solute carrier family 37 member 2 [Source:HGNC Symbol;Acc:HGNC:2644]
ENSSSCG00000008197	SEMA4C	6.8536	NK	71.0667	1.05646	5.54079	3.01109e-08	9.17042e-07	semaphorin 4C [Source:HGNC Symbol;Acc:HGNC:1731]
ENSSSCG00000016093	ENSSSCG00000016093	6.85055	Myeloid	34.9333	0.796842	7.34217	2.10162e-13	2.31318e-12	aldehyde oxidase 2 [Source:RefSeq peptide;Acc:NP_129541]
ENSSSCG00000028237	POU2F3	6.84671	CD21pB	33.3333	1.30952	4.46478	8.01525e-06	8.54715e-05	POU class 2 homeobox 3 [Source:HGNC Symbol;Acc:HGNC:19864]
ENSSSCG00000010949	DAPK1	6.84542	Myeloid	417.467	0.375233	15.5781	1.02536e-54	9.54321e-53	death associated protein kinase 1 [Source:HGNC Symbol;Acc:HGNC:2674]
ENSSSCG00000036086	PAX5	6.82699	CD21nB	4561.33	0.571713	10.1922	2.14947e-24	1.82532e-22	paired box 5 [Source:HGNC Symbol;Acc:HGNC:8619]
ENSSSCG00000015707	GPR39	6.83847	NK	24.8667	1.98482	2.94156	0.00326562	0.0240153	G protein-coupled receptor 39 [Source:HGNC Symbol;Acc:HGNC:4496]
ENSSSCG00000025085	NEGR1	6.83812	Myeloid	15	2.26761	2.57457	0.0100365	0.0302187	neuronal growth regulator 1 [Source:HGNC Symbol;Acc:HGNC:1732]
ENSSSCG00000013100	ENSSSCG00000013100	6.83416	Myeloid	262.933	0.397287	14.685	8.04112e-49	5.53553e-47
ENSSSCG00000015383	RAPGEF5	6.83069	CD21pB	170.8	0.762289	7.64893	2.02655e-14	6.44177e-13	Rap guanine nucleotide exchange factor 5 [Source:HGNC Symbol;Acc:HGNC:16862]
ENSSSCG00000006457	FCRL3	6.80803	CD21nB	4122.8	0.492975	11.7816	4.85642e-32	7.43415e-30	Fc receptor like 3 [Source:HGNC Symbol;Acc:HGNC:1856]
ENSSSCG00000040016	ENSSSCG00000040016	6.82681	Myeloid	1862.8	0.345434	16.8681	7.72688e-64	1.02153e-61
ENSSSCG00000014822	ARHGEF17	6.82533	Myeloid	41.8667	0.923207	6.30988	2.79251e-10	2.3491e-09	Rho guanine nucleotide exchange factor 17 [Source:HGNC Symbol;Acc:HGNC:21726]
ENSSSCG00000015083	FXYD6	6.82394	Myeloid	233.133	0.709485	8.2087	2.23603e-16	3.01437e-15	FXYD domain containing ion transport regulator 6 [Source:HGNC Symbol;Acc:HGNC:43]
ENSSSCG00000040210	ENSSSCG00000040210	6.82311	CD8T	27.6	4.22931	1.37685	0.16856
ENSSSCG00000027568	BLK	6.82288	SWC6gdT	8500.93	0.343401	16.9565	1.72246e-64	1.00196e-60	BLK proto-oncogene, Src family tyrosine kinase [Source:HGNC Symbol;Acc:HGNC:157]
ENSSSCG00000038282	ENSSSCG00000038282	6.82153	CD21pB	101.667	0.69852	8.33409	7.80994e-17	3.11683e-15
ENSSSCG00000008753	ADGRA3	6.82048	Myeloid	45.4667	0.811685	7.17086	7.45308e-13	7.83988e-12	adhesion G protein-coupled receptor A3 [Source:HGNC Symbol;Acc:HGNC:13839]
ENSSSCG00000000423	ENSSSCG00000000423	6.82032	Myeloid	2369.87	0.317612	18.3252	5.20711e-75	1.02677e-72	LDL receptor related protein 1 [Source:HGNC Symbol;Acc:HGNC:6692]
ENSSSCG00000003573	MAP3K6	6.81963	Myeloid	60.2667	1.00494	5.79101	6.9964e-09	5.22105e-08	mitogen-activated protein kinase kinase kinase 6 [Source:HGNC Symbol;Acc:HGNC:6858]
ENSSSCG00000016431	GALNTL5	6.81946	Myeloid	52.2667	0.822027	7.0794	1.44779e-12	1.48664e-11	polypeptide N-acetylgalactosaminyltransferase like 5 [Source:HGNC Symbol;Acc:HGNC:21725]
ENSSSCG00000031364	ENSSSCG00000031364	6.81421	CD21pB	580.8	0.591237	9.83397	8.03898e-23	4.94844e-21
ENSSSCG00000013273	CHST1	6.79478	CD21nB	14.0667	1.80975	3.20198	0.00136489	0.00919993	carbohydrate sulfotransferase 1 [Source:HGNC Symbol;Acc:HGNC:1969]
ENSSSCG00000031248	ENSSSCG00000031248	6.8048	CD21pB	294.8	1.41036	4.11584	3.85769e-05	0.000358469
ENSSSCG00000035525	ENSSSCG00000035525	6.80479	SWC6gdT	36.2667	1.02839	5.64453	1.65634e-08	3.39257e-07
ENSSSCG00000002077	ENSSSCG00000002077	6.80311	CD8T	235.533	0.756041	7.67566	1.6457e-14	6.80223e-13
ENSSSCG00000010577	ELOVL3	6.80157	SWC6gdT	139.133	0.764195	7.59175	3.15617e-14	1.99559e-12	elongation of very long chain fatty acids protein 3 [Source:RefSeq peptide;Acc:NP_116116]
ENSSSCG00000009644	ADAM28	6.79932	Myeloid	391.333	0.37043	15.6556	3.0405e-55	2.89944e-53	ADAM metallopeptidase domain 28 [Source:HGNC Symbol;Acc:HGNC:26]
ENSSSCG00000034211	ENSSSCG00000034211	6.79927	CD21pB	3951.07	0.415703	13.9505	3.12344e-44	8.45073e-42
ENSSSCG00000029239	MZB1	6.75624	CD21nB	2685.93	0.509245	11.3035	1.261e-29	1.57748e-27	marginal zone B and B1 cell specific protein [Source:HGNC Symbol;Acc:HGNC:3125]
ENSSSCG00000036233	ENSSSCG00000036233	6.79401	CD21pB	242.733	0.650548	8.90636	5.27353e-19	2.56704e-17
ENSSSCG00000038811	ENSSSCG00000038811	6.79263	Myeloid	25.4667	1.18789	4.87641	1.08032e-06	6.22817e-06
ENSSSCG00000016480	ENSSSCG00000016480	6.78836	CD4T	1640.13	0.40615	14.2518	4.37037e-46	4.53247e-43
ENSSSCG00000000456	SLC16A7	6.78527	Myeloid	58.4	0.963088	6.00701	1.88981e-09	1.48454e-08	solute carrier family 16 member 7 [Source:HGNC Symbol;Acc:HGNC:1928]
ENSSSCG00000022636	DENND5B	6.78429	CD21pB	143.067	0.665712	8.68888	3.66029e-18	1.65053e-16	DENN domain containing 5B [Source:HGNC Symbol;Acc:HGNC:28338]
ENSSSCG00000030877	FRMPD4	6.78162	Myeloid	191.067	0.399231	14.4819	1.57654e-47	1.00778e-45	FERM and PDZ domain containing 4 [Source:HGNC Symbol;Acc:HGNC:297]
ENSSSCG00000035592	GPR55	6.77952	NK	1054.07	0.397658	14.5339	7.38863e-48	1.43266e-44	G protein-coupled receptor 55 [Source:HGNC Symbol;Acc:HGNC:4511]
ENSSSCG00000002444	FBLN5	6.779	CD8T	55.2667	0.848994	6.80689	9.9733e-12	3.17808e-10	fibulin 5 [Source:HGNC Symbol;Acc:HGNC:362]
ENSSSCG00000024392	THEMIS	6.77615	CD4T	1262.13	0.384047	15.0402	4.00217e-51	7.60945e-48	thymocyte selection associated [Source:HGNC Symbol;Acc:HGNC:21569]
ENSSSCG00000017561	ABCC3	6.77226	Myeloid	66.2667	0.743161	7.76718	8.0251e-15	9.85893e-14	ATP binding cassette subfamily C member 3 [Source:HGNC Symbol;Acc:HGNC:54]
ENSSSCG00000026478	PADI2	6.77103	Myeloid	1046.47	0.381504	15.127	1.07419e-51	8.50145e-50	peptidyl arginine deiminase 2 [Source:HGNC Symbol;Acc:HGNC:18341]
ENSSSCG00000032355	LY86	6.77011	CD21pB	5372.73	0.265722	21.7148	1.48581e-104	4.32148e-101	lymphocyte antigen 86 precursor [Source:RefSeq peptide;Acc:NP_19884]
ENSSSCG00000033624	SRGAP3	6.76933	NK	74.0667	0.949394	6.07685	1.22563e-09	4.98564e-08	SLIT-ROBO Rho GTPase activating protein 3 [Source:HGNC Symbol;Acc:HGNC:19744]
ENSSSCG00000038110	TIFAB	6.76177	Myeloid	82.3333	0.562026	10.2518	1.16176e-24	2.57445e-23	TIFA inhibitor [Source:HGNC Symbol;Acc:HGNC:3424]
ENSSSCG00000015079	BACE1	6.76138	Myeloid	30.8	1.34228	4.29222	1.76894e-05	8.60724e-05	beta-secretase 1 precursor [Source:RefSeq peptide;Acc:NP_1276783]
ENSSSCG00000006431	SPTA1	6.72264	CD21nB	8.86667	2.22502	2.57195	0.0101127	0.0481192	spectrin alpha, erythrocytic 1 [Source:HGNC Symbol;Acc:HGNC:11272]
ENSSSCG00000015238	ARHGAP32	6.75457	NK	224.8	0.887683	6.48269	9.01041e-11	4.51841e-09	Rho GTPase activating protein 32 [Source:HGNC Symbol;Acc:HGNC:17399]
ENSSSCG00000011795	IGF2BP2	6.75395	NK	123.667	0.84619	6.79983	1.04741e-11	6.00275e-10	insulin like growth factor 2 mRNA binding protein 2 [Source:HGNC Symbol;Acc:HGNC:28867]
ENSSSCG00000022226	FASLG	6.75242	NK	299.933	0.671079	8.5719	1.01791e-17	1.4098e-15	tumor necrosis factor ligand superfamily member 6 [Source:RefSeq peptide;Acc:NP_998971]
ENSSSCG00000008959	CXCL2	6.74781	Myeloid	86.0667	0.703394	8.17153	3.0451e-16	4.05805e-15	C-X-C motif chemokine 2 precursor [Source:RefSeq peptide;Acc:NP_11861]
ENSSSCG00000033456	GPR157	6.74545	SWC6gdT	40.4667	1.18117	4.86419	1.14926e-06	1.47008e-05	G protein-coupled receptor 157 [Source:HGNC Symbol;Acc:HGNC:23687]
ENSSSCG00000005437	KLF4	6.74543	Myeloid	5514.47	1.73284	3.31561	0.000914435	0.00338591	Krueppel-like factor 4 [Source:RefSeq peptide;Acc:NP_126952]
ENSSSCG00000010451	IFIT2	6.74524	Myeloid	1514.27	0.42078	13.6538	1.91653e-42	9.99864e-41	interferon-induced protein with tetratricopeptide repeats 2 [Source:RefSeq peptide;Acc:NP_132587]
ENSSSCG00000034215	ENSSSCG00000034215	6.74267	CD21pB	162.8	0.789509	7.27372	3.49729e-13	9.94803e-12
ENSSSCG00000011296	ANO1	6.73837	Myeloid	698.867	0.441061	13.0104	1.06802e-38	4.85365e-37	anoctamin 1 [Source:HGNC Symbol;Acc:HGNC:25519]
ENSSSCG00000000687	CD4	6.7382	CD4T	6135.4	0.428672	13.386	7.30105e-41	5.20565e-38	CD4 molecule [Source:HGNC Symbol;Acc:HGNC:1678]
ENSSSCG00000008240	SH2D6	6.73108	Myeloid	72.0667	0.640643	8.94582	3.69188e-19	5.99043e-18	SH2 domain containing 6 [Source:HGNC Symbol;Acc:HGNC:3439]
ENSSSCG00000009831	CUX2	6.72542	SWC6gdT	296.733	0.55274	10.3582	3.83938e-25	1.17546e-22	cut like homeobox 2 [Source:HGNC Symbol;Acc:HGNC:19347]
ENSSSCG00000032301	ENSSSCG00000032301	6.71409	CD21nB	43.5333	1.42769	4.00232	6.27239e-05	0.000636208
ENSSSCG00000000687	CD4	6.72103	CD4CD8T	6135.4	0.428672	13.3459	1.25084e-40	8.56016e-38	CD4 molecule [Source:HGNC Symbol;Acc:HGNC:1678]
ENSSSCG00000011326	PTH1R	6.71672	NK	701.133	0.4149	13.7786	3.4309e-43	3.32626e-40	Parathyroid hormone/parathyroid hormone-related peptide receptor [Source:UniProtKB/Swiss-Prot;Acc:P5133]
ENSSSCG00000022448	CLNK	6.71455	NK	43.3333	1.68549	3.39045	0.000697785	0.00673696	cytokine dependent hematopoietic cell linker [Source:HGNC Symbol;Acc:HGNC:17438]
ENSSSCG00000002908	ZBTB32	6.7101	CD21nB	1777.07	0.333296	17.1323	8.52817e-66	8.26806e-63	zinc finger and BTB domain containing 32 [Source:HGNC Symbol;Acc:HGNC:16763]
ENSSSCG00000035571	ENSSSCG00000035571	6.71329	CD21pB	89.4667	0.681494	8.38348	5.13842e-17	2.09022e-15
ENSSSCG00000015036	DIXDC1	6.71083	SWC6gdT	107.2	0.903202	6.32287	2.5675e-10	7.65905e-09	DIX domain containing 1 [Source:HGNC Symbol;Acc:HGNC:23695]
ENSSSCG00000022405	P2RX1	6.70206	CD21nB	41.4667	0.93385	6.10596	1.02182e-09	2.60642e-08	purinergic receptor P2X 1 [Source:HGNC Symbol;Acc:HGNC:8533]
ENSSSCG00000000240	KRT85	6.70851	CD8T	134.133	0.909161	6.27888	3.41018e-10	8.74233e-09	keratin 85 [Source:HGNC Symbol;Acc:HGNC:6462]
ENSSSCG00000008923	STAP1	6.70609	CD21pB	289.667	0.55899	10.2079	1.82868e-24	1.23691e-22	signal transducing adaptor family member 1 [Source:HGNC Symbol;Acc:HGNC:24133]
ENSSSCG00000021006	ENSSSCG00000021006	6.70524	CD21pB	7454	0.599231	9.52094	1.71626e-21	9.78774e-20
ENSSSCG00000035293	ENSSSCG00000035293	6.64324	CD21nB	9.26667	2.74239	2.05778	0.0396112	0.138764	Insulin-like growth factor II Insulin-like growth factor II Preptin [Source:UniProtKB/Swiss-Prot;Acc:P23695]
ENSSSCG00000000567	SOX5	6.69193	CD21pB	81.3333	0.708666	8.03189	9.59853e-16	3.51161e-14	SRY-box 5 [Source:HGNC Symbol;Acc:HGNC:1121]
ENSSSCG00000032714	ENSSSCG00000032714	6.68821	CD8T	41.6	1.13319	5.01965	5.17663e-07	7.22828e-06
ENSSSCG00000032902	KLK7	6.68541	CD8T	1458.33	1.1889	4.78208	1.73487e-06	2.11221e-05	kallikrein-7 precursor [Source:RefSeq peptide;Acc:NP_1182273]
ENSSSCG00000026423	SLC23A1	6.6744	CD21pB	142.4	0.771661	7.35349	1.93099e-13	5.65873e-12	solute carrier family 23 member 1 [Source:HGNC Symbol;Acc:HGNC:1974]
ENSSSCG00000037364	ENSSSCG00000037364	6.66728	NK	1395.53	0.974895	5.81322	6.12822e-09	2.20048e-07
ENSSSCG00000008147	FHL2	6.66676	SWC6gdT	452.533	1.21568	4.6614	3.14064e-06	3.53368e-05	four and a half LIM domains 2 [Source:HGNC Symbol;Acc:HGNC:373]
ENSSSCG00000040348	LIN7A	6.65901	Myeloid	92.8667	0.770548	7.34415	2.07077e-13	2.28571e-12	lin-7 homolog A, crumbs cell polarity complex component [Source:HGNC Symbol;Acc:HGNC:17787]
ENSSSCG00000015959	RAPGEF4	6.65866	CD21pB	26.1333	1.42979	3.95767	7.56832e-05	0.000655133	Rap guanine nucleotide exchange factor 4 [Source:HGNC Symbol;Acc:HGNC:16626]
ENSSSCG00000035483	ENSSSCG00000035483	6.65163	NK	1112.6	0.654375	8.63669	5.78631e-18	8.41474e-16
ENSSSCG00000016005	SESTD1	6.6503	Myeloid	106.667	0.893956	6.32056	2.60621e-10	2.1993e-09	SEC14 and spectrin domain containing 1 [Source:HGNC Symbol;Acc:HGNC:18379]
ENSSSCG00000037921	ENSSSCG00000037921	6.64931	NK	544.6	0.56751	9.95455	2.40913e-23	6.83604e-21
ENSSSCG00000004699	ELL3	6.64458	CD21pB	1108.87	0.464453	12.1532	5.51764e-34	6.97741e-32	elongation factor for RNA polymerase II 3 [Source:HGNC Symbol;Acc:HGNC:23113]
ENSSSCG00000013880	UNC13A	6.64357	Myeloid	51.2	1.05707	5.33886	9.35352e-08	6.14796e-07	unc-13 homolog A [Source:HGNC Symbol;Acc:HGNC:2315]
ENSSSCG00000006456	FCRL1	6.62551	CD21nB	2002.87	0.611775	9.19538	3.7367e-20	2.57235e-18	Fc receptor like 1 [Source:HGNC Symbol;Acc:HGNC:1859]
ENSSSCG00000002752	ZFHX3	6.63988	Myeloid	165.6	0.854498	6.60022	4.10541e-11	3.75785e-10	zinc finger homeobox 3 [Source:HGNC Symbol;Acc:HGNC:777]
ENSSSCG00000016480	ENSSSCG00000016480	6.63859	CD4CD8T	1640.13	0.406179	13.8821	8.13826e-44	7.94747e-41
ENSSSCG00000039102	ENSSSCG00000039102	6.63813	NK	344.867	0.732873	7.69319	1.43508e-14	1.24595e-12
ENSSSCG00000029230	ECM1	6.63734	Myeloid	1577.4	0.342023	16.4823	4.91518e-61	5.89517e-59	extracellular matrix protein 1 [Source:HGNC Symbol;Acc:HGNC:3153]
ENSSSCG00000010044	ENSSSCG00000010044	6.63374	CD21pB	12662.2	0.547083	10.2978	7.21038e-25	5.08398e-23
ENSSSCG00000028108	ASAP3	6.63355	Myeloid	236.333	0.433809	12.9862	1.4648e-38	6.57971e-37	ArfGAP with SH3 domain, ankyrin repeat and PH domain 3 [Source:HGNC Symbol;Acc:HGNC:14987]
ENSSSCG00000003818	DOCK7	6.62707	Myeloid	251.333	0.741685	7.58687	3.27718e-14	3.83184e-13	dedicator of cytokinesis 7 [Source:HGNC Symbol;Acc:HGNC:1919]
ENSSSCG00000013351	NAV2	6.6267	NK	12.4	2.46138	2.28599	0.0222548	0.111026	neuron navigator 2 [Source:HGNC Symbol;Acc:HGNC:15997]
ENSSSCG00000032778	PLEKHG1	6.62594	CD21pB	69.2	0.710764	7.91533	2.46595e-15	8.61527e-14	pleckstrin homology and RhoGEF domain containing G1 [Source:HGNC Symbol;Acc:HGNC:2884]
ENSSSCG00000040986	ENSSSCG00000040986	6.62508	CD21nB	28.8667	3.76627	1.49354	0.135295	0.355952
ENSSSCG00000025416	CAMKV	6.61685	CD21nB	18.3333	1.33993	4.19191	2.76621e-05	0.000306204	CaM kinase like vesicle associated [Source:HGNC Symbol;Acc:HGNC:28788]
ENSSSCG00000037214	ENSSSCG00000037214	6.62225	CD21pB	23225.5	0.495549	11.3455	7.80842e-30	7.38562e-28
ENSSSCG00000037126	ENSSSCG00000037126	6.6219	CD4T	133.6	0.60666	9.26696	1.9152e-20	2.42763e-18
ENSSSCG00000037306	ENSSSCG00000037306	6.62162	CD4T	102.2	0.956469	5.87748	4.16571e-09	1.10517e-07
ENSSSCG00000034315	ENSSSCG00000034315	6.60254	CD21nB	151.333	0.835588	6.70491	2.01537e-11	6.38878e-10
ENSSSCG00000033189	FAM17A	6.60944	CD21pB	54.8	0.858161	6.53658	6.2942e-11	1.41912e-09	protein FAM17A [Source:RefSeq peptide;Acc:NP_1239135]
ENSSSCG00000008937	AMBN	6.60748	Myeloid	223.6	0.503959	11.1269	9.28499e-29	2.59667e-27	Ameloblastin [Source:UniProtKB/Swiss-Prot;Acc:Q28989]
ENSSSCG00000034023	ENSSSCG00000034023	6.60363	NK	86.7333	5.91347	0.947604	0.343331	0.767399
ENSSSCG00000039074	TNFRSF13C	6.60291	CD21pB	2102.93	0.414585	13.5145	1.28468e-41	2.76776e-39	TNF receptor superfamily member 13C [Source:HGNC Symbol;Acc:HGNC:17755]
ENSSSCG00000004191	MOXD1	6.56561	CD21nB	84.8	0.669108	8.31796	8.94911e-17	4.71104e-15	monooxygenase DBH like 1 [Source:HGNC Symbol;Acc:HGNC:2163]
ENSSSCG00000015545	GLUL	6.59996	Myeloid	6001.67	0.214787	26.0721	7.54751e-150	2.19519e-146	glutamine synthetase [Source:RefSeq peptide;Acc:NP_99974]
ENSSSCG00000037541	ENSSSCG00000037541	6.59826	Myeloid	336	0.449246	12.4615	1.21134e-35	4.76105e-34
ENSSSCG00000032714	ENSSSCG00000032714	6.59724	CD4CD8T	41.6	1.13343	4.93833	7.87938e-07	1.41246e-05
ENSSSCG00000038616	ENSSSCG00000038616	6.59699	Myeloid	40.6667	0.998928	5.603	2.10675e-08	1.49178e-07
ENSSSCG00000017204	ITGB4	6.58695	Myeloid	35.8	0.808112	6.91358	4.72566e-12	4.67105e-11	integrin subunit beta 4 [Source:HGNC Symbol;Acc:HGNC:6158]
ENSSSCG00000036534	MYOM3	6.5869	NK	14.5333	2.43843	2.29119	0.0219525	0.10997	myomesin 3 [Source:HGNC Symbol;Acc:HGNC:26679]
ENSSSCG00000038185	EREG	6.58619	Myeloid	65.8	0.611501	9.1352	6.52848e-20	1.10718e-18	epiregulin [Source:HGNC Symbol;Acc:HGNC:3443]
ENSSSCG00000016140	FZD5	6.58415	Myeloid	50.7333	0.951394	5.86944	4.37283e-09	3.31679e-08	frizzled class receptor 5 [Source:HGNC Symbol;Acc:HGNC:443]
ENSSSCG00000039270	TREM2	6.58045	Myeloid	58.7333	0.68686	8.12459	4.48875e-16	5.93433e-15	triggering receptor expressed on myeloid cells 2 precursor [Source:RefSeq peptide;Acc:NP_124376]
ENSSSCG00000004202	SAMD3	6.57875	CD8T	620.467	0.489534	11.396	4.3757e-30	8.18327e-28	sterile alpha motif domain containing 3 [Source:HGNC Symbol;Acc:HGNC:21574]
ENSSSCG00000016903	GZMA	6.5779	CD8T	917.267	0.509166	10.955	6.28847e-28	9.96373e-26	granzyme A precursor [Source:RefSeq peptide;Acc:NP_1185855]
ENSSSCG00000023868	ENSSSCG00000023868	6.57745	Myeloid	53.9333	0.958954	5.81618	6.02089e-09	4.51334e-08
ENSSSCG00000014092	S1Z	6.57681	Myeloid	39.4667	1.04602	5.33143	9.74433e-08	6.39039e-07	S1 calcium binding protein Z [Source:HGNC Symbol;Acc:HGNC:3367]
ENSSSCG00000034652	TRAV5	6.57669	CD8T	96.4	0.627158	8.89201	6.00124e-19	3.76166e-17	T cell receptor alpha variable 5 [Source:HGNC Symbol;Acc:HGNC:12143]
ENSSSCG00000037991	RCVRN	6.57567	Myeloid	35.6667	1.56565	3.56125	0.000369087	0.00147813	recoverin [Source:HGNC Symbol;Acc:HGNC:9937]
ENSSSCG00000034961	ENSSSCG00000034961	6.57543	CD21pB	65.6	0.90401	6.16744	6.94041e-10	1.37088e-08
ENSSSCG00000024392	THEMIS	6.57028	CD4CD8T	1262.13	0.384099	14.5022	1.17365e-47	2.2757e-44	thymocyte selection associated [Source:HGNC Symbol;Acc:HGNC:21569]
ENSSSCG00000011436	ENSSSCG00000011436	6.57011	Myeloid	184.8	0.458837	12.1396	6.51199e-34	2.36751e-32	Toll-like receptor 9 [Source:UniProtKB/Swiss-Prot;Acc:Q5I2M3]
ENSSSCG00000036352	RAB7B	6.54827	CD21nB	191.6	0.52326	10.6033	2.87728e-26	2.76647e-24	RAB7B, member RAS oncogene family [Source:HGNC Symbol;Acc:HGNC:3513]
ENSSSCG00000036963	LRRC25	6.56044	Myeloid	995.867	0.364663	15.2482	1.69333e-52	1.39718e-50	leucine rich repeat containing 25 [Source:HGNC Symbol;Acc:HGNC:2986]
ENSSSCG00000014029	COL23A1	6.55378	NK	43.8667	1.60278	3.46509	0.000530055	0.00538103	collagen type XXIII alpha 1 chain [Source:HGNC Symbol;Acc:HGNC:2299]
ENSSSCG00000016903	GZMA	6.55204	NK	917.267	0.710338	7.81605	5.4505e-15	5.24058e-13	granzyme A precursor [Source:RefSeq peptide;Acc:NP_1185855]
ENSSSCG00000025729	IRS1	6.55034	CD21pB	43.2667	0.983179	5.6453	1.64893e-08	2.77622e-07	insulin receptor substrate 1 [Source:RefSeq peptide;Acc:NP_1231418]
ENSSSCG00000009045	HHIP	6.54846	NK	39.5333	1.57035	3.53326	0.000410464	0.00434121	hedgehog interacting protein [Source:HGNC Symbol;Acc:HGNC:14866]
ENSSSCG00000004644	HDC	6.5003	CD21nB	41	1.1873	4.6326	3.61098e-06	4.95403e-05	histidine decarboxylase [Source:HGNC Symbol;Acc:HGNC:4855]
ENSSSCG00000000759	ENSSSCG00000000759	6.54782	SWC6gdT	288.667	1.85393	2.99247	0.00276734	0.0115189
ENSSSCG00000002554	PLD4	6.54718	Myeloid	3656	0.339163	16.3555	3.9739e-60	4.66994e-58	phospholipase D family member 4 [Source:HGNC Symbol;Acc:HGNC:23792]
ENSSSCG00000017517	TBX21	6.54572	NK	4219.27	0.383328	14.4673	1.94957e-47	3.24018e-44	T-box transcription factor TBX21 [Source:RefSeq peptide;Acc:NP_132651]
ENSSSCG00000014599	SYT9	6.54336	CD21pB	90.8667	0.593644	9.33785	9.83134e-21	5.39518e-19	synaptotagmin 9 [Source:HGNC Symbol;Acc:HGNC:19265]
ENSSSCG00000035895	JDP2	6.54304	Myeloid	357.4	0.521835	10.6222	2.34974e-26	5.63648e-25	Jun dimerization protein 2 [Source:HGNC Symbol;Acc:HGNC:17546]
ENSSSCG00000025582	PXDC1	6.53749	CD21pB	560.133	0.362262	15.2859	9.49409e-53	4.0909e-50	PX domain containing 1 [Source:HGNC Symbol;Acc:HGNC:21361]
ENSSSCG00000021675	ENSSSCG00000021675	6.53672	Myeloid	51.9333	0.639225	8.66161	4.65143e-18	7.02788e-17
ENSSSCG00000040615	MALRD1	6.53311	NK	185.867	0.872665	6.34047	2.29063e-10	1.07025e-08	MAM and LDL receptor class A domain containing 1 [Source:HGNC Symbol;Acc:HGNC:24331]
ENSSSCG00000031752	ENSSSCG00000031752	6.52434	CD4CD8T	208.667	0.633568	8.7194	2.79674e-18	3.7834e-16
ENSSSCG00000015120	USP2	6.52125	CD21pB	65.0667	0.784157	7.041	1.90867e-12	4.93456e-11	ubiquitin specific peptidase 2 [Source:HGNC Symbol;Acc:HGNC:12618]
ENSSSCG00000009542	TNFSF13B	6.5209	Myeloid	664.733	0.393276	14.0382	9.09895e-45	5.1387e-43	tumor necrosis factor ligand superfamily member 13B [Source:RefSeq peptide;Acc:NP_19967]
ENSSSCG00000030830	ENSSSCG00000030830	6.51942	CD21pB	42	1.04268	5.29352	1.19987e-07	1.77149e-06
ENSSSCG00000035960	ENSSSCG00000035960	6.51597	Myeloid	98.9333	0.517071	10.6677	1.44141e-26	3.5009e-25
ENSSSCG00000032679	ENSSSCG00000032679	6.51397	NK	1588.87	1.62344	3.39646	0.000682624	0.00662909
ENSSSCG00000027911	LTB4R	6.5119	Myeloid	52.9333	0.911156	6.04935	1.45429e-09	1.15175e-08	leukotriene B4 receptor [Source:HGNC Symbol;Acc:HGNC:6713]
ENSSSCG00000040648	CCL11	6.51039	Myeloid	47.9333	0.877161	6.28207	3.34089e-10	2.78623e-09	C-C motif chemokine 8 precursor [Source:RefSeq peptide;Acc:NP_1157987]
ENSSSCG00000027669	ENSSSCG00000027669	6.50893	SWC6gdT	123.067	0.707497	7.78651	6.88857e-15	4.65939e-13
ENSSSCG00000011074	ARHGAP21	6.50758	Myeloid	834.2	0.417671	13.1864	1.0505e-39	4.94797e-38	Rho GTPase activating protein 21 [Source:HGNC Symbol;Acc:HGNC:23725]
ENSSSCG00000013296	SLC1A2	6.50631	Myeloid	99.5333	0.92582	5.94749	2.72284e-09	2.10482e-08	solute carrier family 1 member 2 [Source:HGNC Symbol;Acc:HGNC:194]
ENSSSCG00000023693	PROC	6.50242	CD21pB	82.4667	0.719816	7.64421	2.10239e-14	6.64653e-13	vitamin K-dependent protein C precursor [Source:RefSeq peptide;Acc:NP_99983]
ENSSSCG00000009745	ADGRD1	6.50137	NK	71.9333	0.965593	5.6974	1.21645e-08	4.10773e-07	adhesion G protein-coupled receptor D1 [Source:HGNC Symbol;Acc:HGNC:19893]
ENSSSCG00000011885	FBXO40	6.50055	CD21pB	90.1333	0.77523	7.09538	1.29e-12	3.41864e-11	F-box protein 4 [Source:HGNC Symbol;Acc:HGNC:29816]
ENSSSCG00000017046	EBF1	6.46975	CD21nB	448.533	0.616412	8.87353	7.08616e-19	4.50494e-17	early B cell factor 1 [Source:HGNC Symbol;Acc:HGNC:3126]
ENSSSCG00000036499	LMO3	6.49675	SWC6gdT	77.8667	0.754159	7.28858	3.13233e-13	1.69496e-11	LIM domain only protein 3 [Source:RefSeq peptide;Acc:NP_116155]
ENSSSCG00000035870	ENSSSCG00000035870	6.4934	CD4T	490.467	2.06703	2.65763	0.00786925	0.0359809
ENSSSCG00000012787	L1CAM	6.49312	SWC6gdT	228	0.835148	6.57742	4.78686e-11	1.64278e-09	L1 cell adhesion molecule [Source:HGNC Symbol;Acc:HGNC:647]
ENSSSCG00000017755	NOS2	6.49125	NK	503.133	0.67928	8.08392	6.27175e-16	6.9491e-14	nitric oxide synthase, inducible [Source:RefSeq peptide;Acc:NP_1137162]
ENSSSCG00000001782	ABHD17C	6.48661	Myeloid	146.6	0.591869	9.26998	1.86177e-20	3.26694e-19	abhydrolase domain containing 17C [Source:HGNC Symbol;Acc:HGNC:26925]
ENSSSCG00000039561	ENSSSCG00000039561	6.48348	CD21pB	68.2	0.672585	8.15284	3.55466e-16	1.36036e-14
ENSSSCG00000025564	GAS2L1	6.48288	Myeloid	51.6	0.746161	7.34812	2.01021e-13	2.22308e-12	GAS2-like protein 1 [Source:RefSeq peptide;Acc:NP_1231763]
ENSSSCG00000026217	ENSSSCG00000026217	6.48105	CD8T	290.733	0.916918	5.97769	2.26328e-09	5.09261e-08
ENSSSCG00000037126	ENSSSCG00000037126	6.48096	CD4CD8T	133.6	0.60687	9.03152	1.69301e-19	2.62619e-17
ENSSSCG00000020758	NQO2	6.4787	Myeloid	149	0.799325	6.85415	7.17354e-12	6.96636e-11	N-ribosyldihydronicotinamide:quinone reductase 2 [Source:HGNC Symbol;Acc:HGNC:7856]
ENSSSCG00000007986	NME4	6.47313	Myeloid	27.9333	0.988713	5.53561	3.1014e-08	2.15671e-07	nucleoside diphosphate kinase, mitochondrial [Source:RefSeq peptide;Acc:NP_1137192]
ENSSSCG00000017041	ADRA1B	6.46494	CD21nB	6.66667	4.23429	1.29064	0.196828	0.472144	adrenoceptor alpha 1B [Source:HGNC Symbol;Acc:HGNC:278]
ENSSSCG00000015277	SOX13	6.44907	CD21nB	3093.27	1.01696	5.35818	8.4063e-08	1.63817e-06	SRY-box 13 [Source:HGNC Symbol;Acc:HGNC:11192]
ENSSSCG00000006397	FCRL6	6.46312	CD8T	262.267	0.450139	12.1365	6.76508e-34	1.60783e-31	Fc receptor like 6 [Source:HGNC Symbol;Acc:HGNC:3191]
ENSSSCG00000033456	GPR157	6.46231	Myeloid	40.4667	1.18182	4.62195	3.80155e-06	2.03906e-05	G protein-coupled receptor 157 [Source:HGNC Symbol;Acc:HGNC:23687]
ENSSSCG00000022719	RAB2	6.46143	Myeloid	93.6667	0.607696	8.98711	2.53824e-19	4.13584e-18	RAB2, member RAS oncogene family [Source:HGNC Symbol;Acc:HGNC:1826]
ENSSSCG00000035828	ARHGEF4	6.46058	CD4T	221.8	0.482095	11.3268	9.67183e-30	2.69113e-27	Rho guanine nucleotide exchange factor 4 [Source:HGNC Symbol;Acc:HGNC:684]
ENSSSCG00000022361	ENSSSCG00000022361	6.46043	CD21pB	2148.4	0.434054	12.5801	2.7172e-36	3.95149e-34
ENSSSCG00000032714	ENSSSCG00000032714	6.4595	CD4T	41.6	1.13381	4.81517	1.47076e-06	2.30472e-05
ENSSSCG00000030305	SLC15A2	6.45742	CD21pB	1994.8	0.569276	9.5866	9.10369e-22	5.26927e-20	solute carrier family 15 member 2 [Source:RefSeq peptide;Acc:NP_19983]
ENSSSCG00000036743	ENSSSCG00000036743	6.45703	NK	98.6	0.864947	6.3091	2.80671e-10	1.29576e-08
ENSSSCG00000038089	COL18A1	6.4552	Myeloid	871.533	0.288334	18.9197	7.84346e-80	1.90106e-77	collagen type XVIII alpha 1 chain [Source:HGNC Symbol;Acc:HGNC:2195]
ENSSSCG00000031848	ENSSSCG00000031848	6.45398	NK	373.533	1.094	4.98538	6.18398e-07	1.44177e-05
ENSSSCG00000008937	AMBN	6.45342	CD21pB	223.6	0.504124	10.8176	2.84084e-27	2.39495e-25	Ameloblastin [Source:UniProtKB/Swiss-Prot;Acc:Q28989]
ENSSSCG00000010281	PSAP	6.45163	Myeloid	46077.9	0.193177	28.2209	3.23829e-175	1.88372e-171	saposin-B-Val precursor [Source:RefSeq peptide;Acc:NP_1185848]
ENSSSCG00000016901	GZMK	6.45061	CD4CD8T	741.267	0.629627	8.6569	4.84788e-18	6.40912e-16	granzyme K precursor [Source:RefSeq peptide;Acc:NP_1137183]
ENSSSCG00000033955	ENSSSCG00000033955	6.44973	CD21pB	41.3333	3.88376	1.40321	0.160555	0.370614
ENSSSCG00000007240	HCK	6.43441	CD21nB	3048.47	0.447741	12.1374	6.69352e-34	1.11246e-31	HCK proto-oncogene, Src family tyrosine kinase [Source:HGNC Symbol;Acc:HGNC:484]
ENSSSCG00000032147	ENSSSCG00000032147	6.44616	NK	143.333	5.91333	0.920996	0.357052	0.784207
ENSSSCG00000034169	ENSSSCG00000034169	6.44335	CD4T	157.733	0.55445	9.81756	9.46017e-23	1.49891e-20
ENSSSCG00000031023	ENSSSCG00000031023	6.44061	CD21pB	2523.07	0.523342	10.3959	2.58882e-25	1.84775e-23
ENSSSCG00000015016	POU2AF1	6.43567	CD21pB	1898.6	0.281819	19.2878	6.798e-83	8.78755e-80	POU domain class 2-associating factor 1 [Source:RefSeq peptide;Acc:NP_123989]
ENSSSCG00000000233	ACVR1B	6.43483	Myeloid	129.133	0.351399	15.4663	5.8619e-54	5.16647e-52	activin receptor type-1B precursor [Source:RefSeq peptide;Acc:NP_1182251]
ENSSSCG00000035511	C1QTNF1	6.43471	Myeloid	30.5333	1.16422	4.6681	3.03996e-06	1.65035e-05	C1q and TNF related 1 [Source:HGNC Symbol;Acc:HGNC:14324]
ENSSSCG00000008486	GALM	6.43466	Myeloid	447	0.396334	13.7123	8.56531e-43	4.52949e-41	Aldose 1-epimerase [Source:UniProtKB/Swiss-Prot;Acc:Q9GKX6]
ENSSSCG00000036630	GCSAML	6.35881	CD21nB	62	1.15126	4.65473	3.24405e-06	4.50373e-05	germinal center associated signaling and motility like [Source:HGNC Symbol;Acc:HGNC:29583]
ENSSSCG00000013940	NLRP3	6.43222	Myeloid	1231.27	0.35208	15.4289	1.04585e-53	8.94664e-52	NACHT, LRR and PYD domains-containing protein 3 [Source:RefSeq peptide;Acc:NP_1243699]
ENSSSCG00000037141	ENSSSCG00000037141	6.432	CD21pB	7474.6	0.856834	6.33961	2.30341e-10	4.85468e-09
ENSSSCG00000023992	CEP112	6.4263	Myeloid	41	0.869806	6.23852	4.41744e-10	3.64486e-09	centrosomal protein 112 [Source:HGNC Symbol;Acc:HGNC:28514]
ENSSSCG00000011125	GATA3	6.4252	SWC6gdT	5816.53	0.602963	8.99756	2.30797e-19	3.19653e-17	trans-acting T-cell-specific transcription factor GATA-3 [Source:RefSeq peptide;Acc:NP_13832]
ENSSSCG00000031364	ENSSSCG00000031364	6.42463	NK	580.8	0.816588	6.64305	3.07264e-11	1.65496e-09
ENSSSCG00000024392	THEMIS	6.41543	CD8T	1262.13	0.384143	14.0974	3.93978e-45	1.72866e-42	thymocyte selection associated [Source:HGNC Symbol;Acc:HGNC:21569]
ENSSSCG00000015669	ACVR2A	6.41337	SWC6gdT	682.267	0.614209	8.81356	1.21236e-18	1.54995e-16	activin receptor type-2A precursor [Source:RefSeq peptide;Acc:NP_1191694]
ENSSSCG00000000504	PTPRB	6.41253	NK	34	1.23942	4.36698	1.25974e-05	0.000211484	protein tyrosine phosphatase, receptor type B [Source:HGNC Symbol;Acc:HGNC:9665]
ENSSSCG00000017896	SCIMP	6.41213	CD21pB	1435.27	0.465951	11.6152	3.44867e-31	3.64744e-29	SLP adaptor and CSK interacting membrane protein [Source:HGNC Symbol;Acc:HGNC:3354]
ENSSSCG00000034842	ENSSSCG00000034842	6.41213	NK	124.2	0.950326	5.69502	1.23358e-08	4.13588e-07
ENSSSCG00000037913	ENSSSCG00000037913	6.41027	NK	1726.4	0.754188	7.17364	7.30305e-13	4.93975e-11
ENSSSCG00000015700	TMEM163	6.40956	CD21pB	89.8	1.006	5.37728	7.56204e-08	1.15304e-06	transmembrane protein 163 [Source:HGNC Symbol;Acc:HGNC:2538]
ENSSSCG00000014203	ENSSSCG00000014203	6.40195	SWC6gdT	180.8	0.581495	9.28975	1.54644e-20	2.85576e-18
ENSSSCG00000025106	ENSSSCG00000025106	6.40181	Myeloid	48.6667	0.87733	6.15709	7.40917e-10	6.01524e-09
ENSSSCG00000001650	PTCRA	6.39919	NK	88.5333	1.56657	3.4465	0.000567896	0.00571037	pre T-cell antigen receptor alpha isoform 1 precursor [Source:RefSeq peptide;Acc:NP_124419]
ENSSSCG00000031830	ENSSSCG00000031830	6.39822	SWC6gdT	35.4667	0.907901	5.94583	2.75066e-09	6.70883e-08
ENSSSCG00000035870	ENSSSCG00000035870	6.39411	CD8T	490.467	2.06704	2.60958	0.00906545	0.0333394
ENSSSCG00000008193	ZAP70	6.39168	SWC6gdT	9562.53	0.593572	9.08345	1.0519e-19	1.54908e-17	zeta chain of T cell receptor associated protein kinase 7 [Source:HGNC Symbol;Acc:HGNC:12858]
ENSSSCG00000006378	SLAMF7	6.38772	SWC6gdT	3500.27	0.332627	16.1975	5.25439e-59	2.03765e-55	SLAM family member 7 [Source:HGNC Symbol;Acc:HGNC:21394]
ENSSSCG00000032902	KLK7	6.38589	CD4T	1458.33	1.18892	4.53008	5.89613e-06	8.0845e-05	kallikrein-7 precursor [Source:RefSeq peptide;Acc:NP_1182273]
ENSSSCG00000002055	ENSSSCG00000002055	6.38058	SWC6gdT	156.467	1.13052	4.7594	1.94168e-06	2.30505e-05
ENSSSCG00000032108	SH2D1B	6.38002	Myeloid	327.6	0.77052	6.98232	2.90347e-12	2.89948e-11	SH2 domain containing 1B [Source:HGNC Symbol;Acc:HGNC:3416]
ENSSSCG00000000705	CD27	6.37944	CD8T	6568.33	1.14778	4.68684	2.77455e-06	3.22323e-05	CD27 antigen precursor [Source:RefSeq peptide;Acc:NP_1265692]
ENSSSCG00000031604	TRAV2	6.37904	CD4CD8T	95.8	0.757887	7.09741	1.27118e-12	7.70255e-11	T cell receptor alpha variable 2 [Source:HGNC Symbol;Acc:HGNC:12116]
ENSSSCG00000033385	ENSSSCG00000033385	6.37027	NK	185.067	0.687077	7.81611	5.448e-15	5.24058e-13
ENSSSCG00000027607	IER3	6.37026	Myeloid	48.3333	1.03408	5.19329	2.06611e-07	1.30001e-06	immediate early response 3 [Source:HGNC Symbol;Acc:HGNC:5392]
ENSSSCG00000002893	CD22	6.36478	CD21pB	3000.33	0.387183	13.8559	1.17152e-43	3.02876e-41	CD22 molecule [Source:HGNC Symbol;Acc:HGNC:1643]
ENSSSCG00000001052	PHACTR1	6.36437	Myeloid	1059.4	0.36652	14.6359	1.65664e-48	1.10134e-46	phosphatase and actin regulator 1 [Source:HGNC Symbol;Acc:HGNC:299]
ENSSSCG00000039708	KLRB1	6.36395	NK	860.6	0.665668	8.05799	7.75575e-16	8.5123e-14	killer cell lectin like receptor B1 [Source:HGNC Symbol;Acc:HGNC:6373]
ENSSSCG00000006250	LYN	6.36147	Myeloid	6908.53	0.305308	17.5609	4.91114e-69	7.51793e-67	LYN proto-oncogene, Src family tyrosine kinase [Source:HGNC Symbol;Acc:HGNC:6735]
ENSSSCG00000034169	ENSSSCG00000034169	6.35941	CD8T	157.733	0.554627	9.66308	4.32647e-22	3.62562e-20
ENSSSCG00000039217	ENSSSCG00000039217	6.35699	CD21nB	2921.53	1.04335	5.13443	2.82997e-07	4.98091e-06
ENSSSCG00000015362	TSPAN13	6.35854	Myeloid	1035.47	0.548865	9.76294	1.62382e-22	3.19114e-21	tetraspanin 13 [Source:HGNC Symbol;Acc:HGNC:21643]
ENSSSCG00000005358	ENSSSCG00000005358	6.35854	NK	141.333	0.871849	6.14617	7.93745e-10	3.35797e-08
ENSSSCG00000007359	LPIN3	6.3584	Myeloid	22.8	1.42152	3.76949	0.000163579	0.000693288	phosphatidate phosphatase LPIN3 [Source:RefSeq peptide;Acc:NP_1135458]
ENSSSCG00000008159	IL1RL1	6.35774	SWC6gdT	815.267	0.770467	6.95388	3.55369e-12	1.55427e-10	interleukin 1 receptor like 1 [Source:HGNC Symbol;Acc:HGNC:5998]
ENSSSCG00000026084	SLC49A3	6.35708	Myeloid	1289.67	0.375699	14.259	3.94154e-46	2.38833e-44	solute carrier family 49 member 3 [Source:HGNC Symbol;Acc:HGNC:26177]
ENSSSCG00000037475	ENSSSCG00000037475	6.34395	CD21nB	969.2	0.557263	9.58964	8.83939e-22	6.67776e-20
ENSSSCG00000011238	ARPP21	6.35627	NK	289.667	1.39556	3.83807	0.000124005	0.00154462	cAMP regulated phosphoprotein 21 [Source:HGNC Symbol;Acc:HGNC:16968]
ENSSSCG00000024311	CCR2	6.35297	Myeloid	5666.27	0.535344	9.99913	1.5374e-23	3.19965e-22	C-C chemokine receptor type 2 [Source:RefSeq peptide;Acc:NP_11619]
ENSSSCG00000034980	IRF8	6.35127	Myeloid	3484.6	0.419865	12.7452	3.31485e-37	1.40236e-35	interferon regulatory factor 8 [Source:HGNC Symbol;Acc:HGNC:5358]
ENSSSCG00000016122	CTLA4	6.34968	CD4CD8T	105.067	0.821141	6.51494	7.27177e-11	3.18044e-09	cytotoxic T-lymphocyte protein 4 precursor [Source:RefSeq peptide;Acc:NP_999314]
ENSSSCG00000012137	BMX	6.34882	Myeloid	334.4	0.476767	11.2189	3.29199e-29	9.50349e-28	BMX non-receptor tyrosine kinase [Source:HGNC Symbol;Acc:HGNC:179]
ENSSSCG00000035880	RF26	6.3464	CD4CD8T	15.8667	4.23414	1.26269	0.206701	0.460519
ENSSSCG00000000680	GPR162	6.34501	Myeloid	58.4667	1.01899	5.24537	1.55967e-07	9.98635e-07	G protein-coupled receptor 162 [Source:HGNC Symbol;Acc:HGNC:16693]
ENSSSCG00000023371	EHD2	6.34189	CD21nB	14.6	1.52238	3.50891	0.000449946	0.00355616	EH domain containing 2 [Source:HGNC Symbol;Acc:HGNC:3243]
ENSSSCG00000015700	TMEM163	6.33941	CD21nB	89.8	1.00608	5.30717	1.11342e-07	2.1097e-06	transmembrane protein 163 [Source:HGNC Symbol;Acc:HGNC:2538]
ENSSSCG00000008205	ENSSSCG00000008205	6.29131	CD21nB	54.4667	0.788192	6.71323	1.90362e-11	6.08425e-10
ENSSSCG00000003578	FGR	6.33663	NK	4583.8	0.613822	8.6941	3.49577e-18	5.35129e-16	FGR proto-oncogene, Src family tyrosine kinase [Source:HGNC Symbol;Acc:HGNC:3697]
ENSSSCG00000000688	LAG3	6.33582	CD8T	218.733	0.87243	6.11604	9.59316e-10	2.31347e-08	lymphocyte activation gene 3 protein precursor [Source:RefSeq peptide;Acc:NP_198776]
ENSSSCG00000037736	ENSSSCG00000037736	6.33284	NK	218.6	0.820025	6.50326	7.85963e-11	4.02815e-09
ENSSSCG00000032582	ENSSSCG00000032582	6.33056	NK	8017.53	0.687692	7.75138	9.08986e-15	8.19779e-13
ENSSSCG00000029239	MZB1	6.33013	CD21pB	2685.93	0.50928	10.466	1.23767e-25	9.11335e-24	marginal zone B and B1 cell specific protein [Source:HGNC Symbol;Acc:HGNC:3125]
ENSSSCG00000032611	ENSSSCG00000032611	6.32556	CD8T	320.533	0.402219	13.2405	5.1232e-40	1.82642e-37
ENSSSCG00000008406	CCDC88A	6.32181	Myeloid	1576.27	0.640736	8.30578	9.91643e-17	1.37506e-15	coiled-coil domain containing 88A [Source:HGNC Symbol;Acc:HGNC:25523]
ENSSSCG00000004607	PYGO1	6.32035	CD4CD8T	37.3333	0.882733	6.02714	1.66884e-09	5.48454e-08	pygopus family PHD finger 1 [Source:HGNC Symbol;Acc:HGNC:3256]
ENSSSCG00000031502	ENSSSCG00000031502	6.32016	CD21pB	271.467	0.467272	11.3856	4.93434e-30	4.78384e-28
ENSSSCG00000035379	JCHAIN	6.31752	NK	13572.9	0.732713	7.2573	3.94881e-13	2.80125e-11	joining chain of multimeric IgA and IgM [Source:HGNC Symbol;Acc:HGNC:5713]
ENSSSCG00000008875	RXFP1	6.31606	NK	13.2	2.12958	2.4963	0.0125496	0.0704306	relaxin/insulin like family peptide receptor 1 [Source:HGNC Symbol;Acc:HGNC:19718]
ENSSSCG00000005385	NR4A3	6.30863	NK	155.333	0.622882	8.52269	1.55892e-17	2.13371e-15	nuclear receptor subfamily 4 group A member 3 [Source:RefSeq peptide;Acc:NP_999412]
ENSSSCG00000031951	ENSSSCG00000031951	6.30642	Myeloid	162.8	0.51102	10.384	2.93301e-25	6.77037e-24
ENSSSCG00000002084	ENSSSCG00000002084	6.30417	CD4CD8T	363.733	0.751875	7.05459	1.73109e-12	1.02753e-10
ENSSSCG00000032241	GPNMB	6.2993	Myeloid	168.533	0.517715	10.2359	1.3686e-24	3.00421e-23	transmembrane glycoprotein NMB precursor [Source:RefSeq peptide;Acc:NP_19254]
ENSSSCG00000002099	ENSSSCG00000002099	6.29851	CD4CD8T	185.667	1.81476	2.91967	0.00350399	0.0208306
ENSSSCG00000010454	IFIT5	6.29744	Myeloid	352.6	0.55087	9.6165	6.81125e-22	1.30118e-20	interferon-induced protein with tetratricopeptide repeats 5 [Source:RefSeq peptide;Acc:NP_13251]
ENSSSCG00000022993	TBC1D8B	6.29405	Myeloid	25.6667	1.63771	3.2326	0.00122669	0.00443346	TBC1 domain family member 8B [Source:HGNC Symbol;Acc:HGNC:24715]
ENSSSCG00000018058	ARHGAP23	6.29356	NK	25.5333	1.65701	3.19465	0.0014	0.0121097	Rho GTPase activating protein 23 [Source:HGNC Symbol;Acc:HGNC:29293]
ENSSSCG00000032017	ENSSSCG00000032017	6.27939	CD21nB	13757.7	0.889822	5.93309	2.97287e-09	7.07287e-08
ENSSSCG00000031604	TRAV2	6.28773	CD8T	95.8	0.758036	6.97556	3.04646e-12	1.03435e-10	T cell receptor alpha variable 2 [Source:HGNC Symbol;Acc:HGNC:12116]
ENSSSCG00000040772	ENSSSCG00000040772	6.28585	NK	204.8	5.6442	0.93651	0.349011	0.77444
ENSSSCG00000032607	ALPL	6.2837	NK	35.3333	2.27175	2.32582	0.0200279	0.102457	alkaline phosphatase, liver/bone/kidney [Source:HGNC Symbol;Acc:HGNC:438]
ENSSSCG00000040986	ENSSSCG00000040986	6.28172	CD21pB	28.8667	3.76657	1.40226	0.160837	0.371192
ENSSSCG00000039391	ENSSSCG00000039391	6.2812	NK	439.6	1.0053	5.25335	1.49359e-07	3.93131e-06
ENSSSCG00000006357	FCER1G	6.28098	NK	4807.13	0.626433	8.43023	3.44993e-17	4.41061e-15	High affinity immunoglobulin epsilon receptor subunit gamma [Source:UniProtKB/Swiss-Prot;Acc:Q9XSZ6]
ENSSSCG00000032355	LY86	6.27931	CD21nB	5372.73	0.265761	19.8649	8.19003e-88	4.76414e-84	lymphocyte antigen 86 precursor [Source:RefSeq peptide;Acc:NP_19884]
ENSSSCG00000028552	BHLHE41	6.25264	CD21nB	650.333	0.390771	13.4418	3.44198e-41	8.0088e-39	basic helix-loop-helix family member e41 [Source:HGNC Symbol;Acc:HGNC:16617]
ENSSSCG00000040465	KLRK1	6.27865	CD8T	3611.2	0.884442	5.96834	2.39684e-09	5.37194e-08	NKG2-D type II integral membrane protein [Source:RefSeq peptide;Acc:NP_998978]
ENSSSCG00000037126	ENSSSCG00000037126	6.27677	CD8T	133.6	0.607208	8.69022	3.6175e-18	2.11633e-16
ENSSSCG00000016504	TBXAS1	6.27056	Myeloid	1180.13	0.381202	13.8262	1.772e-43	9.54418e-42	Thromboxane-A synthase [Source:UniProtKB/Swiss-Prot;Acc:P47787]
ENSSSCG00000016480	ENSSSCG00000016480	6.27041	CD8T	1640.13	0.406261	12.973	1.74108e-38	5.67492e-36
ENSSSCG00000000839	ALDH1L2	6.26583	Myeloid	520.4	0.413755	12.7269	4.18982e-37	1.75972e-35	aldehyde dehydrogenase 1 family member L2 [Source:HGNC Symbol;Acc:HGNC:26777]
ENSSSCG00000040534	ENSSSCG00000040534	6.26276	CD21pB	30.2	1.03518	5.08392	3.69717e-07	5.06034e-06
ENSSSCG00000023762	TRPM2	6.25754	Myeloid	103.333	0.599212	8.77409	1.72293e-18	2.67975e-17	transient receptor potential cation channel subfamily M member 2 [Source:HGNC Symbol;Acc:HGNC:12339]
ENSSSCG00000040897	ENSSSCG00000040897	6.25339	CD8T	55.6667	1.15912	4.53224	5.83617e-06	6.25155e-05
ENSSSCG00000014823	P2RY6	6.24265	CD21nB	79.8667	4.23431	1.23814	0.215665	0.50443	P2Y purinoceptor 6 [Source:RefSeq peptide;Acc:NP_1231225]
ENSSSCG00000034565	ENSSSCG00000034565	6.24624	CD4CD8T	440.4	0.802336	6.53871	6.20519e-11	2.76594e-09
ENSSSCG00000039381	ENSSSCG00000039381	6.24389	SWC6gdT	830.133	1.37392	3.81673	0.000135234	0.000935936
ENSSSCG00000007754	ITGAM	6.24377	NK	11616.7	0.642369	8.16317	3.26333e-16	3.8349e-14	integrin subunit alpha X [Source:HGNC Symbol;Acc:HGNC:6152]
ENSSSCG00000029968	ASIC4	6.22276	CD21nB	162.6	0.957887	5.45238	4.96997e-08	1.00209e-06	acid sensing ion channel subunit family member 4 [Source:HGNC Symbol;Acc:HGNC:21263]
ENSSSCG00000026724	PLBD1	6.24258	NK	14930.3	1.64727	3.18258	0.00145969	0.0125052	phospholipase B-like 1 precursor [Source:RefSeq peptide;Acc:NP_1231558]
ENSSSCG00000032499	ENSSSCG00000032499	6.24234	NK	180.467	5.77963	0.907038	0.364387	0.794169
ENSSSCG00000007586	FSCN1	6.23984	NK	695.933	0.583235	8.9841	2.60863e-19	4.89496e-17	fascin [Source:RefSeq peptide;Acc:NP_1139772]
ENSSSCG00000040607	MAF	6.23181	SWC6gdT	1720	0.700835	7.46511	8.32288e-14	4.91514e-12	MAF bZIP transcription factor [Source:HGNC Symbol;Acc:HGNC:6776]
ENSSSCG00000025686	KMO	6.23162	Myeloid	1201.6	0.362943	14.4144	4.19783e-47	2.63987e-45	kynurenine 3-monooxygenase [Source:RefSeq peptide;Acc:NP_999241]
ENSSSCG00000015801	TLR3	6.23073	Myeloid	225.067	0.532771	9.81798	9.42169e-23	1.89313e-21	toll-like receptor 3 precursor [Source:RefSeq peptide;Acc:NP_19913]
ENSSSCG00000014149	MEF2C	6.2259	Myeloid	2813.4	0.573061	9.11928	7.56242e-20	1.27141e-18	myocyte-specific enhancer factor 2C [Source:RefSeq peptide;Acc:NP_1385]
ENSSSCG00000008703	ADRA2C	6.22503	SWC6gdT	74.6	1.09883	4.75507	1.98381e-06	2.34788e-05	adrenoceptor alpha 2C [Source:HGNC Symbol;Acc:HGNC:283]
ENSSSCG00000030830	ENSSSCG00000030830	6.21534	CD21nB	42	1.04372	4.99686	5.82705e-07	9.6984e-06
ENSSSCG00000000663	ENSSSCG00000000663	6.21878	NK	5100.87	0.738366	7.068	1.57177e-12	1.01028e-10
ENSSSCG00000010768	CFAP46	6.21876	CD8T	100.733	1.03681	5.03349	4.81625e-07	6.79157e-06	cilia and flagella associated protein 46 [Source:HGNC Symbol;Acc:HGNC:25247]
ENSSSCG00000004746	ITPKA	6.21821	CD21pB	64.6	1.13445	4.59977	4.22959e-06	4.76813e-05	inositol-trisphosphate 3-kinase A [Source:HGNC Symbol;Acc:HGNC:6178]
ENSSSCG00000000896	NTN4	6.2079	CD21nB	107.4	0.536205	9.71252	2.66674e-22	2.09627e-20	netrin 4 [Source:HGNC Symbol;Acc:HGNC:13658]
ENSSSCG00000015661	C4BPB	6.21351	CD21pB	814.4	0.3706	14.0677	5.99584e-45	1.70136e-42	complement component 4 binding protein beta [Source:HGNC Symbol;Acc:HGNC:1328]
ENSSSCG00000040363	ENSSSCG00000040363	6.21075	NK	168.067	0.864402	6.02816	1.65842e-09	6.60754e-08
ENSSSCG00000001572	FGD2	6.20624	CD21nB	1907	0.468553	11.1113	1.10513e-28	1.27297e-26	FYVE, RhoGEF and PH domain containing 2 [Source:HGNC Symbol;Acc:HGNC:3664]
ENSSSCG00000037837	ENSSSCG00000037837	6.20683	NK	229.133	3.2597	1.59733	0.110192	0.36173
ENSSSCG00000038489	BHLHA15	6.19641	CD21nB	256.933	0.602571	8.62373	6.48071e-18	3.80791e-16	basic helix-loop-helix family member a15 [Source:HGNC Symbol;Acc:HGNC:22265]
ENSSSCG00000002443	TC2N	6.20416	CD4T	753.067	0.347256	14.9865	8.99522e-51	1.46596e-47	tandem C2 domains, nuclear [Source:HGNC Symbol;Acc:HGNC:19859]
ENSSSCG00000038204	ENSSSCG00000038204	6.20169	NK	603	0.669451	7.77007	7.84425e-15	7.18583e-13
ENSSSCG00000038392	ENSSSCG00000038392	6.19441	CD21nB	2195.6	1.00165	5.18587	2.15004e-07	3.87807e-06
ENSSSCG00000007425	SNX21	6.18937	CD21nB	90.7333	0.698855	7.42553	1.12326e-13	4.5533e-12	sorting nexin family member 21 [Source:HGNC Symbol;Acc:HGNC:16154]
ENSSSCG00000004191	MOXD1	6.19205	CD21pB	84.8	0.669859	7.75097	9.11923e-15	3.03992e-13	monooxygenase DBH like 1 [Source:HGNC Symbol;Acc:HGNC:2163]
ENSSSCG00000001818	FES	6.19003	Myeloid	1800.47	0.40087	12.9469	2.44582e-38	1.07783e-36	FES proto-oncogene, tyrosine kinase [Source:HGNC Symbol;Acc:HGNC:3657]
ENSSSCG00000007807	CD19	6.17909	CD21nB	3128.87	0.341613	15.1607	6.43869e-52	3.25686e-49	B-lymphocyte antigen CD19 precursor [Source:RefSeq peptide;Acc:NP_999542]
ENSSSCG00000014093	CRHBP	6.18723	Myeloid	193.933	0.558757	9.28352	1.63968e-20	2.89031e-19	corticotropin-releasing factor-binding protein precursor [Source:RefSeq peptide;Acc:NP_1182261]
ENSSSCG00000026742	BTK	6.18687	CD21pB	4618.8	0.43349	11.9654	5.3953e-33	6.53842e-31	tyrosine-protein kinase BTK [Source:RefSeq peptide;Acc:NP_12355]
ENSSSCG00000016486	ENSSSCG00000016486	6.1799	CD8T	59.2	0.823282	6.29177	3.13868e-10	8.08264e-09
ENSSSCG00000026602	PTGIR	6.17983	Myeloid	76.1333	0.7337	7.05988	1.66647e-12	1.69918e-11	prostaglandin I2 receptor [Source:HGNC Symbol;Acc:HGNC:962]
ENSSSCG00000013307	LMO2	6.16077	CD21nB	1212.33	0.279306	18.4771	3.15611e-76	7.34364e-73	LIM domain only 2 [Source:HGNC Symbol;Acc:HGNC:6642]
ENSSSCG00000022361	ENSSSCG00000022361	6.17871	Myeloid	2148.4	0.434089	11.9301	8.24974e-33	2.81459e-31
ENSSSCG00000039146	ENSSSCG00000039146	6.1774	NK	2883.2	0.590262	8.77135	1.76531e-18	2.93395e-16
ENSSSCG00000036127	ENSSSCG00000036127	6.17135	NK	682.6	0.623855	8.28935	1.13872e-16	1.36576e-14
ENSSSCG00000035415	ENSSSCG00000035415	6.17088	CD21pB	1857.53	0.48688	10.6204	2.39462e-26	1.86973e-24
ENSSSCG00000012970	CTSW	6.16935	NK	18882.7	0.577661	8.94876	3.59502e-19	6.63881e-17	cathepsin W [Source:HGNC Symbol;Acc:HGNC:2546]
ENSSSCG00000039883	ENSSSCG00000039883	6.16598	CD21pB	40.6667	0.846378	6.10363	1.03683e-09	1.98723e-08
ENSSSCG00000024960	PDGFC	6.16571	CD21pB	42.3333	1.02857	5.02224	5.10726e-07	6.83749e-06	platelet derived growth factor C [Source:HGNC Symbol;Acc:HGNC:881]
ENSSSCG00000021397	PODXL2	6.16206	Myeloid	79.5333	0.774037	6.66901	2.57528e-11	2.40264e-10	podocalyxin like 2 [Source:HGNC Symbol;Acc:HGNC:17936]
ENSSSCG00000002077	ENSSSCG00000002077	6.16152	CD4CD8T	235.533	0.756456	6.8233	8.89748e-12	4.62113e-10
ENSSSCG00000033114	ENSSSCG00000033114	6.16149	CD21pB	318.867	0.5021	10.2798	8.68956e-25	6.09002e-23
ENSSSCG00000035078	CD40	6.15448	CD21nB	2002.53	0.4394	11.7307	8.86896e-32	1.32284e-29	Tumor necrosis factor receptor superfamily member 5 [Source:UniProtKB/Swiss-Prot;Acc:Q8SQ34]
ENSSSCG00000033046	ENSSSCG00000033046	6.1591	CD8T	102.933	4.35976	1.18335	0.236672	0.445758
ENSSSCG00000026268	DLG5	6.15807	Myeloid	60.5333	0.659808	7.81754	5.38676e-15	6.66698e-14	discs large MAGUK scaffold protein 5 [Source:HGNC Symbol;Acc:HGNC:294]
ENSSSCG00000010428	DKK1	6.15687	CD21pB	30.7333	1.43609	3.59091	0.000329527	0.00236796	dickkopf-related protein 1 precursor [Source:RefSeq peptide;Acc:NP_1138856]
ENSSSCG00000036626	ENSSSCG00000036626	6.15449	SWC6gdT	14.6	1.98077	2.60227	0.00926097	0.031293
ENSSSCG00000039074	TNFRSF13C	6.13922	CD21nB	2102.93	0.414634	12.3946	2.79547e-35	4.71341e-33	TNF receptor superfamily member 13C [Source:HGNC Symbol;Acc:HGNC:17755]
ENSSSCG00000016442	AOC1	6.15261	SWC6gdT	103.867	0.738371	6.97835	2.98672e-12	1.33644e-10	Amiloride-sensitive amine oxidase [copper-containing] [Source:UniProtKB/Swiss-Prot;Acc:Q9TRC7]
ENSSSCG00000032156	GPR146	6.14941	SWC6gdT	488.067	0.697966	7.37774	1.61e-13	9.13696e-12	G protein-coupled receptor 146 [Source:HGNC Symbol;Acc:HGNC:21718]
ENSSSCG00000017880	SPNS3	6.14753	NK	179.333	1.18517	4.3433	1.4036e-05	0.000232945	sphingolipid transporter 3 (putative) [Source:HGNC Symbol;Acc:HGNC:28433]
ENSSSCG00000033327	PDGFB	6.14524	NK	280.733	0.641943	8.0151	1.10044e-15	1.18542e-13	platelet derived growth factor subunit B [Source:HGNC Symbol;Acc:HGNC:88]
ENSSSCG00000030246	FCRLA	6.12104	CD21nB	2058.47	0.422002	12.1351	6.88087e-34	1.12749e-31	Fc receptor like A [Source:HGNC Symbol;Acc:HGNC:1854]
ENSSSCG00000032419	ENSSSCG00000032419	6.13752	NK	256.133	1.12277	4.57576	4.74503e-06	9.03496e-05
ENSSSCG00000035443	ENSSSCG00000035443	6.13418	NK	2067.33	0.820455	6.25772	3.90653e-10	1.76157e-08
ENSSSCG00000021557	SULT1A3	6.13365	Myeloid	1060.4	0.458033	11.208	3.72363e-29	1.06965e-27	sulfotransferase 1A3 [Source:RefSeq peptide;Acc:NP_99893]
ENSSSCG00000000675	C1R	6.12997	Myeloid	500.4	0.330493	15.5222	2.45533e-54	2.23166e-52	complement C1r [Source:HGNC Symbol;Acc:HGNC:1246]
ENSSSCG00000031037	ENSSSCG00000031037	6.12742	NK	9806.53	0.668714	7.66758	1.75275e-14	1.51048e-12
ENSSSCG00000038162	CCL21	6.12616	Myeloid	84.5333	0.800932	6.40025	1.55122e-10	1.33879e-09	C-C motif chemokine 21 precursor [Source:RefSeq peptide;Acc:NP_15151]
ENSSSCG00000036745	ENSSSCG00000036745	6.1245	SWC6gdT	913.333	1.27051	4.03342	5.49718e-05	0.000428074
ENSSSCG00000038909	ENSSSCG00000038909	6.12184	SWC6gdT	522.8	1.28928	3.97265	7.1078e-05	0.00053144
ENSSSCG00000030113	SHISA2	6.11873	CD21nB	204.8	0.569756	8.98409	2.60886e-19	1.70514e-17	shisa family member 2 [Source:HGNC Symbol;Acc:HGNC:2366]
ENSSSCG00000035416	ENSSSCG00000035416	6.12064	CD21pB	453.467	0.500324	10.2347	1.38683e-24	9.54699e-23
ENSSSCG00000010577	ELOVL3	6.09429	CD21nB	139.133	0.764854	6.66048	2.72931e-11	8.6051e-10	elongation of very long chain fatty acids protein 3 [Source:RefSeq peptide;Acc:NP_116116]
ENSSSCG00000011880	EAF2	6.11684	CD21pB	1582.07	0.306155	16.7132	1.04964e-62	7.63218e-60	ELL associated factor 2 [Source:HGNC Symbol;Acc:HGNC:23115]
ENSSSCG00000002954	SPINT2	6.10957	Myeloid	1448.93	0.371914	13.7386	5.96444e-43	3.16851e-41	serine peptidase inhibitor, Kunitz type 2 [Source:HGNC Symbol;Acc:HGNC:11247]
ENSSSCG00000012530	ENSSSCG00000012530	6.10635	CD21pB	20.5333	1.55595	3.28181	0.00103141	0.00622379	transcription elongation factor A protein-like 2 [Source:RefSeq peptide;Acc:NP_123359]
ENSSSCG00000011074	ARHGAP21	6.10149	NK	834.2	0.581526	8.77259	1.74597e-18	2.93395e-16	Rho GTPase activating protein 21 [Source:HGNC Symbol;Acc:HGNC:23725]
ENSSSCG00000008205	ENSSSCG00000008205	6.10079	CD21pB	54.4667	0.788655	6.4677	9.95043e-11	2.19665e-09
ENSSSCG00000022500	ENSSSCG00000022500	6.09875	NK	251.333	1.33008	3.83342	0.000126373	0.00156907	interleukin 2 receptor subunit beta [Source:HGNC Symbol;Acc:HGNC:64]
ENSSSCG00000040505	ENSSSCG00000040505	6.09758	CD4CD8T	78.4	0.763668	6.67513	2.47012e-11	1.19242e-09
ENSSSCG00000002084	ENSSSCG00000002084	6.09536	CD4T	363.733	0.751967	6.77604	1.23513e-11	5.16132e-10
ENSSSCG00000015661	C4BPB	6.08216	CD21nB	814.4	0.370638	13.7119	8.61521e-43	2.27794e-40	complement component 4 binding protein beta [Source:HGNC Symbol;Acc:HGNC:1328]
ENSSSCG00000022945	UCHL1	6.09378	CD8T	80.8667	0.864119	5.89477	3.75204e-09	8.26319e-08	Ubiquitin carboxyl-terminal hydrolase isozyme L1 [Source:UniProtKB/Swiss-Prot;Acc:Q6SEG5]
ENSSSCG00000040308	ENSSSCG00000040308	6.0932	SWC6gdT	431	0.825036	6.17331	6.68754e-10	1.83066e-08
ENSSSCG00000012201	CXorf21	6.09223	Myeloid	484.933	0.471682	10.7959	3.5994e-27	9.10335e-26	chromosome X open reading frame 21 [Source:HGNC Symbol;Acc:HGNC:25667]
ENSSSCG00000013111	CD6	6.09201	CD4CD8T	5872.87	0.388105	13.1202	2.52315e-39	1.54497e-36	CD6 molecule [Source:HGNC Symbol;Acc:HGNC:1691]
ENSSSCG00000035243	RAB27B	6.09162	SWC6gdT	267.2	0.5215	9.76342	1.61612e-22	3.68666e-20	RAB27B, member RAS oncogene family [Source:HGNC Symbol;Acc:HGNC:9767]
ENSSSCG00000012118	TLR8	6.08899	Myeloid	975.867	0.232065	21.9292	1.36842e-106	1.06135e-103	toll-like receptor 8 precursor [Source:RefSeq peptide;Acc:NP_999352]
ENSSSCG00000038871	ENSSSCG00000038871	6.08844	NK	92.4667	1.06743	4.76699	1.87003e-06	3.99488e-05
ENSSSCG00000004283	DPPA5	6.06119	CD21nB	50.4667	4.2388	1.19402	0.232472	0.533237	developmental pluripotency-associated 5 protein [Source:RefSeq peptide;Acc:NP_1153745]
ENSSSCG00000032741	TBC1D9	6.07449	Myeloid	1477.07	0.366992	13.8272	1.74628e-43	9.44938e-42	TBC1 domain family member 9 [Source:HGNC Symbol;Acc:HGNC:2171]
ENSSSCG00000000292	ZNF385A	6.07246	Myeloid	643.667	0.264067	19.2089	3.11545e-82	8.4291e-80	zinc finger protein 385A [Source:HGNC Symbol;Acc:HGNC:17521]
ENSSSCG00000001572	FGD2	6.07176	Myeloid	1907	0.46857	10.8239	2.6525e-27	6.75256e-26	FYVE, RhoGEF and PH domain containing 2 [Source:HGNC Symbol;Acc:HGNC:3664]
ENSSSCG00000036246	ENSSSCG00000036246	6.07015	CD21pB	407.733	0.446206	11.3628	6.40503e-30	6.15836e-28
ENSSSCG00000028561	CD28	6.069	CD4CD8T	2304.13	0.261639	19.374	1.27872e-83	1.48767e-79	T-cell-specific surface glycoprotein CD28 precursor [Source:RefSeq peptide;Acc:NP_1274339]
ENSSSCG00000017951	ATP1B2	6.06838	CD4CD8T	22.1333	1.23106	4.11711	3.83659e-05	0.000449495	ATPase Na+/K+ transporting subunit beta 2 [Source:HGNC Symbol;Acc:HGNC:85]
ENSSSCG00000032367	CEBPD	6.06557	Myeloid	1017.8	0.478201	10.593	3.21199e-26	7.65743e-25	CCAAT/enhancer binding protein delta [Source:HGNC Symbol;Acc:HGNC:1835]
ENSSSCG00000035415	ENSSSCG00000035415	6.05711	CD21nB	1857.53	0.486893	10.3865	2.85635e-25	2.57603e-23
ENSSSCG00000013599	ANGPTL4	6.05851	CD21pB	723.867	0.22034	22.9577	1.23427e-116	7.17975e-113	Angiopoietin-related protein 4 [Source:UniProtKB/Swiss-Prot;Acc:Q2TNK5]
ENSSSCG00000010665	SHTN1	6.04282	CD21nB	325.267	0.750149	6.72243	1.78717e-11	5.74363e-10	shootin 1 [Source:HGNC Symbol;Acc:HGNC:29319]
ENSSSCG00000026742	BTK	6.05354	Myeloid	4618.8	0.433498	11.6576	2.09868e-31	6.85843e-30	tyrosine-protein kinase BTK [Source:RefSeq peptide;Acc:NP_12355]
ENSSSCG00000000433	B4GALNT1	6.05203	Myeloid	416.667	0.322395	15.6703	2.41483e-55	2.32183e-53	beta-1,4-N-acetyl-galactosaminyltransferase 1 [Source:HGNC Symbol;Acc:HGNC:4117]
ENSSSCG00000032700	ENSSSCG00000032700	6.05193	NK	781.467	0.679169	7.4384	1.01913e-13	7.80036e-12
ENSSSCG00000022675	NCR1	6.05092	Myeloid	279.067	0.849231	5.94764	2.72042e-09	2.10482e-08	natural cytotoxicity triggering receptor 1 precursor [Source:RefSeq peptide;Acc:NP_1116615]
ENSSSCG00000023842	TRAT1	6.0499	CD8T	4637.67	0.332525	15.1865	4.34293e-52	3.53887e-49	T cell receptor associated transmembrane adaptor 1 [Source:HGNC Symbol;Acc:HGNC:3698]
ENSSSCG00000002041	SLC7A7	6.04962	Myeloid	1514.27	0.236562	21.3459	4.25565e-101	2.15262e-98	Y+L amino acid transporter 1 [Source:RefSeq peptide;Acc:NP_113891]
ENSSSCG00000029945	GCAT	6.04566	NK	90.9333	1.06031	4.75865	1.94889e-06	4.14449e-05	glycine C-acetyltransferase [Source:HGNC Symbol;Acc:HGNC:4188]
ENSSSCG00000015016	POU2AF1	6.03022	CD21nB	1898.6	0.281887	17.8448	3.17131e-71	4.61188e-68	POU domain class 2-associating factor 1 [Source:RefSeq peptide;Acc:NP_123989]
ENSSSCG00000023537	SYT8	6.04145	NK	29.8	1.64709	3.06081	0.00220737	0.017538	synaptotagmin 8 [Source:HGNC Symbol;Acc:HGNC:19264]
ENSSSCG00000006995	ASAH1	6.03737	Myeloid	2075.6	0.322625	15.6137	5.87166e-55	5.50894e-53	N-acylsphingosine amidohydrolase 1 [Source:HGNC Symbol;Acc:HGNC:735]
ENSSSCG00000030775	ENSSSCG00000030775	6.03638	NK	5627.73	0.596325	8.4457	3.02218e-17	3.90667e-15
ENSSSCG00000015487	TNFSF18	6.03596	CD21pB	16.0667	1.36191	3.69771	0.000217553	0.00164887	TNF superfamily member 18 [Source:HGNC Symbol;Acc:HGNC:11932]
ENSSSCG00000033813	ENSSSCG00000033813	6.0319	NK	570.933	0.889259	5.65853	1.52675e-08	5.01758e-07
ENSSSCG00000021443	SGK1	6.03043	Myeloid	5122.27	0.914852	5.49863	3.82746e-08	2.63483e-07	serine/threonine-protein kinase Sgk1 [Source:RefSeq peptide;Acc:NP_1231388]
ENSSSCG00000015405	ENSSSCG00000015405	5.99821	CD21nB	547.8	0.798272	6.26128	3.81819e-10	1.03545e-08	platelet glycoprotein 4 [Source:RefSeq peptide;Acc:NP_13887]
ENSSSCG00000024059	VAT1	6.0291	Myeloid	2959.13	0.435733	11.5417	8.13082e-31	2.56352e-29	vesicle amine transport 1 [Source:HGNC Symbol;Acc:HGNC:16919]
ENSSSCG00000034610	ENSSSCG00000034610	6.02901	SWC6gdT	59.2667	0.977985	5.14222	2.71512e-07	4.15627e-06
ENSSSCG00000005997	COL14A1	6.02565	Myeloid	239.4	0.37488	13.406	5.57605e-41	2.7723e-39	collagen type XIV alpha 1 chain [Source:HGNC Symbol;Acc:HGNC:2191]
ENSSSCG00000034250	ENSSSCG00000034250	6.02528	NK	89.9333	1.42896	3.51673	0.000436895	0.00457089
ENSSSCG00000007115	THBD	6.02419	Myeloid	331.067	0.770081	6.52424	6.83473e-11	6.10247e-10	thrombomodulin precursor [Source:RefSeq peptide;Acc:NP_112424]
ENSSSCG00000036672	ENSSSCG00000036672	6.02238	CD8T	72.3333	0.788113	6.37266	1.85775e-10	4.94014e-09
ENSSSCG00000034219	TRBV3	6.02073	CD4T	499	0.448675	11.1901	4.55768e-29	1.20916e-26	T cell receptor beta variable 3 (gene/pseudogene) [Source:HGNC Symbol;Acc:HGNC:12214]
ENSSSCG00000016486	ENSSSCG00000016486	6.01958	CD4T	59.2	0.823596	6.09471	1.09636e-09	3.23185e-08
ENSSSCG00000007240	HCK	6.01805	Myeloid	3048.47	0.447774	11.2067	3.78183e-29	1.08369e-27	HCK proto-oncogene, Src family tyrosine kinase [Source:HGNC Symbol;Acc:HGNC:484]
ENSSSCG00000032803	CYP2S1	6.01701	Myeloid	319.4	0.409072	12.2644	1.40702e-34	5.2975e-33	cytochrome P45 family 2 subfamily S member 1 [Source:HGNC Symbol;Acc:HGNC:15654]
ENSSSCG00000001472	SLA-DOA	6.01689	CD21pB	1743.6	0.213901	23.4542	1.1966e-121	1.39213e-117	SLA class II histocompatibility antigen, DO alpha chain precursor [Source:RefSeq peptide;Acc:NP_117272]
ENSSSCG00000008217	CD8A	6.01411	NK	7257.87	0.48275	10.3865	2.85526e-25	1.07155e-22	T-cell surface glycoprotein CD8 alpha chain precursor [Source:RefSeq peptide;Acc:NP_1197]
ENSSSCG00000008392	BCL11A	6.01346	CD21pB	918.467	0.398219	12.5897	2.40639e-36	3.54378e-34	B-cell lymphoma/leukemia 11A [Source:RefSeq peptide;Acc:NP_1284563]
ENSSSCG00000031616	FOSB	6.01316	CD21pB	2478.6	1.74713	2.86937	0.00411296	0.0202927	FosB proto-oncogene, AP-1 transcription factor subunit [Source:HGNC Symbol;Acc:HGNC:3797]
ENSSSCG00000002712	LDHD	6.00942	NK	69.7333	1.21262	4.13108	3.61062e-05	0.000526391	lactate dehydrogenase D [Source:HGNC Symbol;Acc:HGNC:1978]
ENSSSCG00000011806	MASP1	6.00579	NK	66.4	1.26319	3.96282	7.4071e-05	0.000989186	mannan-binding lectin serine protease 1 precursor [Source:RefSeq peptide;Acc:NP_1171876]
ENSSSCG00000038096	CCL4	6.00562	CD8T	159.8	0.551558	9.07542	1.13239e-19	7.59903e-18	C-C motif chemokine 4 [Source:UniProtKB/Swiss-Prot;Acc:Q711P4]
ENSSSCG00000031374	ENSSSCG00000031374	6.00561	SWC6gdT	31.7333	1.24993	4.00471	6.20929e-05	0.000476507
ENSSSCG00000035017	ENSSSCG00000035017	6.00244	CD21pB	44.8	4.1927	1.19313	0.232819	0.487073
ENSSSCG00000011972	FILIP1L	5.99844	Myeloid	124.2	0.903908	5.52981	3.20571e-08	2.2226e-07	filamin A interacting protein 1 like [Source:HGNC Symbol;Acc:HGNC:24589]
ENSSSCG00000028997	ENSSSCG00000028997	5.99249	CD21nB	13.3333	2.02955	2.45991	0.0138973	0.0617105
ENSSSCG00000000749	SLC6A12	5.99277	Myeloid	28.5333	1.37204	3.63893	0.000273768	0.00111716	solute carrier family 6 member 12 [Source:HGNC Symbol;Acc:HGNC:1145]
ENSSSCG00000035928	CLDN3	5.9887	CD21nB	82.9333	1.1192	4.45739	8.29629e-06	0.000105485
ENSSSCG00000009399	CYSLTR2	5.99132	Myeloid	136.733	0.538268	9.27294	1.81087e-20	3.18725e-19	cysteinyl leukotriene receptor 2 [Source:RefSeq peptide;Acc:NP_999295]
ENSSSCG00000036654	ENSSSCG00000036654	5.98961	NK	185.867	0.941331	5.30059	1.1543e-07	3.09428e-06
ENSSSCG00000000784	LRRK2	5.98883	Myeloid	3625	0.36187	13.7862	3.08423e-43	1.65355e-41	leucine-rich repeat serine/threonine-protein kinase 2 [Source:RefSeq peptide;Acc:NP_11698]
ENSSSCG00000031794	TNFAIP8L3	5.94609	CD21nB	20.2	1.48696	3.32632	0.000880024	0.00630431	TNF alpha induced protein 8 like 3 [Source:HGNC Symbol;Acc:HGNC:262]
ENSSSCG00000033808	ENSSSCG00000033808	5.98669	CD21pB	65.2667	0.907763	5.49338	3.94312e-08	6.27555e-07
ENSSSCG00000008842	KIT	5.98644	Myeloid	865.6	0.574354	8.68182	3.8949e-18	5.93105e-17	mast/stem cell growth factor receptor Kit precursor [Source:RefSeq peptide;Acc:NP_13799]
ENSSSCG00000034426	ENSSSCG00000034426	5.98438	NK	167.8	0.837851	5.94901	2.69772e-09	1.02232e-07
ENSSSCG00000035542	ENSSSCG00000035542	5.98431	NK	91.4	5.2943	0.941448	0.346475	0.770726
ENSSSCG00000024900	TRBV25-1	5.98221	CD8T	270.2	0.496488	10.0349	1.07044e-23	1.10014e-21	T cell receptor beta variable 25-1 [Source:HGNC Symbol;Acc:HGNC:1225]
ENSSSCG00000027998	ENSSSCG00000027998	5.98075	Myeloid	222.6	0.983404	5.06481	4.08815e-07	2.48363e-06
ENSSSCG00000016083	PLCL1	5.9802	SWC6gdT	713.667	0.466562	10.6743	1.34334e-26	5.04143e-24	phospholipase C like 1 (inactive) [Source:HGNC Symbol;Acc:HGNC:963]
ENSSSCG00000033251	TREM1	5.97218	Myeloid	135.533	0.54268	9.16227	5.08171e-20	8.68144e-19	Triggering receptor expressed on myeloid cells 1 [Source:UniProtKB/Swiss-Prot;Acc:Q6TYI6]
ENSSSCG00000006811	SLC6A17	5.971	CD8T	197.733	1.01672	4.88928	1.01207e-06	1.31364e-05	solute carrier family 6 member 17 [Source:HGNC Symbol;Acc:HGNC:31399]
ENSSSCG00000008432	STPG4	5.96305	CD21pB	71.5333	0.733306	6.76805	1.30534e-11	3.19041e-10	sperm-tail PG-rich repeat containing 4 [Source:HGNC Symbol;Acc:HGNC:2685]
ENSSSCG00000029482	CHST15	5.95918	Myeloid	991.4	0.336089	14.7556	2.83358e-49	1.96225e-47	carbohydrate sulfotransferase 15 [Source:HGNC Symbol;Acc:HGNC:18137]
ENSSSCG00000008923	STAP1	5.95786	Myeloid	289.667	0.559413	8.86262	7.81566e-19	1.249e-17	signal transducing adaptor family member 1 [Source:HGNC Symbol;Acc:HGNC:24133]
ENSSSCG00000012551	RNF128	5.95613	NK	15.7333	2.0136	2.46133	0.0138422	0.0760699	ring finger protein 128, E3 ubiquitin protein ligase [Source:HGNC Symbol;Acc:HGNC:21153]
ENSSSCG00000036061	ENSSSCG00000036061	5.95572	CD4CD8T	46.8667	0.906138	5.46906	4.52438e-08	1.06552e-06
ENSSSCG00000029710	GCNT4	5.95033	CD4T	1668.07	0.270964	18.2693	1.45312e-74	8.2886e-71	glucosaminyl (N-acetyl) transferase 4, core 2 [Source:HGNC Symbol;Acc:HGNC:17973]
ENSSSCG00000016618	CPED1	5.94915	Myeloid	21.2667	1.3472	3.67366	0.000239104	0.000985384	cadherin like and PC-esterase domain containing 1 [Source:HGNC Symbol;Acc:HGNC:26159]
ENSSSCG00000014725	HBB	5.94904	NK	23515.1	2.08086	2.37836	0.0173897	0.0917097	hemoglobin subunit beta [Source:RefSeq peptide;Acc:NP_1138313]
ENSSSCG00000035880	RF26	5.94658	CD8T	15.8667	4.23475	1.16809	0.24277
ENSSSCG00000031653	DOK3	5.9463	Myeloid	404.6	0.326283	15.1595	6.55405e-52	5.22259e-50	docking protein 3 [Source:HGNC Symbol;Acc:HGNC:24583]
ENSSSCG00000013144	ENSSSCG00000013144	5.93747	CD21nB	3322.13	1.31902	3.74329	0.000181623	0.00160197
ENSSSCG00000036224	ENSSSCG00000036224	5.94319	NK	17293	0.713268	6.93034	4.19837e-12	2.53077e-10
ENSSSCG00000015294	ENSSSCG00000015294	5.9372	CD21nB	850.667	0.376316	13.1198	2.5351e-39	5.08506e-37
ENSSSCG00000025582	PXDC1	5.92965	CD21nB	560.133	0.362543	13.5974	4.14872e-42	1.04927e-39	PX domain containing 1 [Source:HGNC Symbol;Acc:HGNC:21361]
ENSSSCG00000003278	ENSSSCG00000003278	5.93609	Myeloid	1951.47	0.559245	8.82634	1.08154e-18	1.71426e-17	leukocyte immunoglobulin-like receptor subfamily B member 3-like isoform 1 precursor [Source:RefSeq peptide;Acc:NP_12381]
ENSSSCG00000012254	GPR82	5.93552	CD21pB	104.467	0.738452	6.68361	2.33135e-11	5.53528e-10	probable G-protein coupled receptor 82 [Source:RefSeq peptide;Acc:NP_123635]
ENSSSCG00000033797	ENSSSCG00000033797	5.93469	NK	556.267	2.32517	2.1223	0.0338129	0.151965
ENSSSCG00000030246	FCRLA	5.93088	CD21pB	2058.47	0.42203	11.6837	1.54376e-31	1.69435e-29	Fc receptor like A [Source:HGNC Symbol;Acc:HGNC:1854]
ENSSSCG00000022318	ERG	5.92907	CD21nB	35.2	1.02031	4.83094	1.35891e-06	2.07194e-05	transcriptional regulator ERG [Source:RefSeq peptide;Acc:NP_1231385]
ENSSSCG00000025592	TP63	5.92088	CD21nB	25	4.19818	1.17215	0.241139	0.548038	tumor protein p63 [Source:HGNC Symbol;Acc:HGNC:15979]
ENSSSCG00000026655	PTPN13	5.9249	CD4CD8T	433.467	0.557852	8.82832	1.06258e-18	1.52618e-16	protein tyrosine phosphatase, non-receptor type 13 [Source:HGNC Symbol;Acc:HGNC:9646]
ENSSSCG00000030246	FCRLA	5.92227	Myeloid	2058.47	0.422031	11.6633	1.9632e-31	6.43376e-30	Fc receptor like A [Source:HGNC Symbol;Acc:HGNC:1854]
ENSSSCG00000015448	NME8	5.92094	CD4CD8T	68.0667	0.765477	6.42859	1.2879e-10	5.22069e-09	NME/NM23 family member 8 [Source:HGNC Symbol;Acc:HGNC:16473]
ENSSSCG00000026360	CLGN	5.9164	CD21nB	48.8	4.23025	1.1622	0.245154	0.554736	calmegin precursor [Source:RefSeq peptide;Acc:NP_123136]
ENSSSCG00000038885	ENSSSCG00000038885	5.92041	CD8T	143.467	0.94454	5.20932	1.89533e-07	2.98646e-06
ENSSSCG00000004441	ENSSSCG00000004441	5.91866	Myeloid	614.2	0.243359	20.2115	7.7506e-91	2.81783e-88
ENSSSCG00000000639	ENSSSCG00000000639	5.88828	CD21nB	123.2	4.23013	1.15558	0.247851	0.559251
ENSSSCG00000014034	N4BP3	5.91316	NK	314.8	0.713446	6.88652	5.7175e-12	3.39375e-10	NEDD4 binding protein 3 [Source:HGNC Symbol;Acc:HGNC:29852]
ENSSSCG00000007522	CTSZ	5.91313	Myeloid	5521.53	0.193182	25.4326	1.09855e-142	1.59757e-139	cathepsin Z precursor [Source:RefSeq peptide;Acc:NP_1116576]
ENSSSCG00000016479	TRBV19	5.90822	CD4T	345.467	0.418558	11.7265	9.32249e-32	3.32347e-29	T cell receptor beta variable 19 [Source:HGNC Symbol;Acc:HGNC:12194]
ENSSSCG00000000623	BCL2L14	5.90381	Myeloid	176.467	0.475639	10.3099	6.35413e-25	1.43542e-23	apoptosis facilitator Bcl-2-like protein 14 [Source:RefSeq peptide;Acc:NP_132597]
ENSSSCG00000036013	ENSSSCG00000036013	5.90322	CD4T	2040.67	1.03558	4.73478	2.19289e-06	3.34446e-05	trypsinogen precursor [Source:RefSeq peptide;Acc:NP_1156363]
ENSSSCG00000022951	NFASC	5.90162	Myeloid	20.3333	1.53804	3.18692	0.00143798	0.0051507	neurofascin [Source:HGNC Symbol;Acc:HGNC:29866]
ENSSSCG00000034692	SH3BP4	5.8996	SWC6gdT	361	0.347826	14.0863	4.60834e-45	6.70168e-42	SH3 domain binding protein 4 [Source:HGNC Symbol;Acc:HGNC:1826]
ENSSSCG00000005267	ANXA1	5.89941	Myeloid	18822.9	0.533064	9.19104	3.89075e-20	6.69601e-19	annexin A1 [Source:RefSeq peptide;Acc:NP_115747]
ENSSSCG00000034565	ENSSSCG00000034565	5.8962	CD4T	440.4	0.802459	6.1015	1.05081e-09	3.13812e-08
ENSSSCG00000010826	MARC2	5.8949	Myeloid	88.6667	0.623073	7.85607	3.9638e-15	4.94795e-14	mitochondrial amidoxime reducing component 2 [Source:HGNC Symbol;Acc:HGNC:2664]
ENSSSCG00000038885	ENSSSCG00000038885	5.8889	CD4CD8T	143.467	0.94457	5.17579	2.26947e-07	4.55225e-06
ENSSSCG00000009921	OASL	5.88646	CD21nB	58.4667	1.08802	4.49117	7.08334e-06	9.13609e-05	2'-5'-oligoadenylate synthase-like protein [Source:RefSeq peptide;Acc:NP_12696]
ENSSSCG00000034961	ENSSSCG00000034961	5.88676	NK	65.6	1.2424	3.93332	8.378e-05	0.0010964
ENSSSCG00000021874	UNC5C	5.87655	CD21nB	42.6	4.23546	1.15136	0.249583	0.561633	unc-5 netrin receptor C [Source:HGNC Symbol;Acc:HGNC:12569]
ENSSSCG00000031752	ENSSSCG00000031752	5.88598	CD4T	208.667	0.634147	7.70481	1.3104e-14	8.44578e-13
ENSSSCG00000035189	ENSSSCG00000035189	5.88483	CD4CD8T	142.733	0.639543	7.638	2.20629e-14	1.74612e-12
ENSSSCG00000031604	TRAV2	5.88358	CD4T	95.8	0.758805	6.43589	1.2275e-10	4.32201e-09	T cell receptor alpha variable 2 [Source:HGNC Symbol;Acc:HGNC:12116]
ENSSSCG00000029249	NAV3	5.88149	Myeloid	712.467	0.482132	10.1248	4.28904e-24	9.27486e-23	neuron navigator 3 [Source:HGNC Symbol;Acc:HGNC:15998]
ENSSSCG00000039998	CLIC2	5.87931	Myeloid	468.533	0.300933	16.2139	4.0201e-59	4.41225e-57	chloride intracellular channel protein 2 [Source:RefSeq peptide;Acc:NP_1231357]
ENSSSCG00000002099	ENSSSCG00000002099	5.87753	CD4T	185.667	1.81491	2.68748	0.00719936	0.0336599
ENSSSCG00000016664	NPSR1	5.87377	CD21nB	27.7333	4.23489	1.15086	0.249789	0.56199	neuropeptide S receptor 1 [Source:HGNC Symbol;Acc:HGNC:23631]
ENSSSCG00000000423	ENSSSCG00000000423	5.87544	NK	2369.87	0.44353	10.9924	4.15898e-28	1.93542e-25	LDL receptor related protein 1 [Source:HGNC Symbol;Acc:HGNC:6692]
ENSSSCG00000033640	ENSSSCG00000033640	5.87381	NK	599.6	3.13957	1.55238	0.120571	0.384098
ENSSSCG00000027505	ESYT3	5.86743	CD21nB	27.5333	1.28776	3.77977	0.000156974	0.00141898	extended synaptotagmin 3 [Source:HGNC Symbol;Acc:HGNC:24295]
ENSSSCG00000035675	ENSSSCG00000035675	5.87148	Myeloid	488.267	0.342886	14.2073	8.25676e-46	4.85147e-44
ENSSSCG00000032330	THY1	5.87111	CD21pB	8217.2	0.33799	14.412	4.34851e-47	1.36731e-44	thy-1 membrane glycoprotein precursor [Source:RefSeq peptide;Acc:NP_113961]
ENSSSCG00000035733	PLXNB2	5.86993	Myeloid	861.733	0.343758	14.1668	1.4713e-45	8.55855e-44	plexin B2 [Source:HGNC Symbol;Acc:HGNC:914]
ENSSSCG00000002389	VASH1	5.8689	Myeloid	640.333	0.49728	9.79108	1.22978e-22	2.44569e-21	vasohibin 1 [Source:HGNC Symbol;Acc:HGNC:19964]
ENSSSCG00000034060	ENSSSCG00000034060	5.81883	CD21nB	32.9333	4.23137	1.13883	0.254772	0.569785
ENSSSCG00000000530	FGD4	5.86554	Myeloid	250.2	0.759034	6.41017	1.45361e-10	1.26075e-09	FYVE, RhoGEF and PH domain containing 4 [Source:HGNC Symbol;Acc:HGNC:19125]
ENSSSCG00000003799	IL12RB2	5.86534	NK	549.467	0.698603	6.96439	3.29838e-12	2.03034e-10	interleukin-12 receptor subunit beta-2 precursor [Source:RefSeq peptide;Acc:NP_999262]
ENSSSCG00000036918	ENSSSCG00000036918	5.85785	CD8T	222.733	0.735914	6.60111	4.08102e-11	1.1907e-09
ENSSSCG00000025592	TP63	5.85451	CD21pB	25	4.19825	1.15632	0.247551	0.509541	tumor protein p63 [Source:HGNC Symbol;Acc:HGNC:15979]
ENSSSCG00000009842	CCDC60	5.85374	Myeloid	27.2667	0.904168	5.36819	7.95328e-08	5.26927e-07	coiled-coil domain containing 6 [Source:HGNC Symbol;Acc:HGNC:2861]
ENSSSCG00000032163	ENSSSCG00000032163	5.85233	NK	854.933	0.648295	7.48475	7.16822e-14	5.6348e-12
ENSSSCG00000006369	F11R	5.84505	Myeloid	196.867	0.375283	12.9104	3.9322e-38	1.70064e-36	junctional adhesion molecule A precursor [Source:RefSeq peptide;Acc:NP_1121916]
ENSSSCG00000003366	CHD5	5.8438	Myeloid	27.3333	1.21125	3.99901	6.36092e-05	0.000286057	chromodomain helicase DNA binding protein 5 [Source:HGNC Symbol;Acc:HGNC:16816]
ENSSSCG00000026196	ENSSSCG00000026196	5.84267	Myeloid	110.6	0.66096	7.32672	2.35845e-13	2.58301e-12
ENSSSCG00000017758	SPAG5	5.84039	NK	65.8667	1.66676	2.90407	0.0036835	0.0264693	sperm-associated antigen 5 [Source:RefSeq peptide;Acc:NP_1152783]
ENSSSCG00000012376	GDPD2	5.83731	CD8T	82.4667	0.907099	5.33272	9.67512e-08	1.6113e-06	glycerophosphodiester phosphodiesterase domain containing 2 [Source:HGNC Symbol;Acc:HGNC:25974]
ENSSSCG00000008162	IL1R1	5.83719	CD4CD8T	301.533	0.652681	7.41126	1.25104e-13	8.98433e-12	interleukin 1 receptor type 1 [Source:HGNC Symbol;Acc:HGNC:5993]
ENSSSCG00000027378	SH3PXD2B	5.83702	Myeloid	117.733	0.525306	9.20801	3.32237e-20	5.75185e-19	SH3 and PX domains 2B [Source:HGNC Symbol;Acc:HGNC:29242]
ENSSSCG00000039056	GAS7	5.83669	Myeloid	1530.93	0.441041	10.9665	5.53483e-28	1.47689e-26	growth arrest specific 7 [Source:HGNC Symbol;Acc:HGNC:4169]
ENSSSCG00000040410	ENSSSCG00000040410	5.83535	CD8T	294.933	0.521897	9.26495	1.95172e-20	1.39157e-18
ENSSSCG00000010504	BLNK	5.83404	CD21pB	2063.2	0.521737	9.26528	1.94561e-20	1.04792e-18	B cell linker [Source:HGNC Symbol;Acc:HGNC:14211]
ENSSSCG00000014909	ENSSSCG00000014909	5.83262	NK	1055.73	0.500972	9.64648	5.08709e-22	1.25922e-19
ENSSSCG00000003694	EMILIN2	5.83229	Myeloid	6387.2	0.326165	14.8155	1.16392e-49	8.20672e-48	elastin microfibril interfacer 2 [Source:HGNC Symbol;Acc:HGNC:19881]
ENSSSCG00000000640	ENSSSCG00000000640	5.83203	CD8T	620.333	0.447714	10.7927	3.72809e-27	5.52338e-25
ENSSSCG00000040009	ENSSSCG00000040009	5.83106	CD21pB	169.267	0.673384	7.1743	7.26768e-13	1.99415e-11
ENSSSCG00000024136	AMPH	5.82966	CD8T	484.667	1.98129	2.43763	0.014784	0.049561	amphiphysin [Source:RefSeq peptide;Acc:NP_1231132]
ENSSSCG00000016184	ENSSSCG00000016184	5.82461	Myeloid	104	0.421399	11.449	2.37842e-30	7.28171e-29
ENSSSCG00000040210	ENSSSCG00000040210	5.82105	CD4CD8T	27.6	4.23019	1.13968	0.254421	0.534455
ENSSSCG00000031228	OPRL1	5.81685	CD21nB	80.2	0.676118	7.12427	1.04633e-12	3.87675e-11	nociceptin receptor [Source:RefSeq peptide;Acc:NP_999341]
ENSSSCG00000016122	CTLA4	5.81853	CD4T	105.067	0.821781	5.86351	4.53174e-09	1.19949e-07	cytotoxic T-lymphocyte protein 4 precursor [Source:RefSeq peptide;Acc:NP_999314]
ENSSSCG00000002077	ENSSSCG00000002077	5.81831	CD4T	235.533	0.756755	6.36707	1.92676e-10	6.56133e-09
ENSSSCG00000025005	B4GALT6	5.81791	CD21pB	316.667	0.779205	6.1831	6.28538e-10	1.24573e-08	beta-1,4-galactosyltransferase 6 [Source:HGNC Symbol;Acc:HGNC:929]
ENSSSCG00000023790	ENSSSCG00000023790	5.81772	CD8T	200.667	0.853866	5.64225	1.67844e-08	3.25641e-07
ENSSSCG00000028237	POU2F3	5.80394	CD21nB	33.3333	1.31178	3.66217	0.000250089	0.00212375	POU class 2 homeobox 3 [Source:HGNC Symbol;Acc:HGNC:19864]
ENSSSCG00000037104	RF1877	5.80942	SWC6gdT	468.933	0.472949	10.169	2.72684e-24	7.55335e-22
ENSSSCG00000039393	SPRED1	5.80874	NK	84.7333	0.976768	4.92311	8.51788e-07	1.9469e-05	sprouty related EVH1 domain containing 1 [Source:HGNC Symbol;Acc:HGNC:2249]
ENSSSCG00000004646	ATP8B4	5.80734	NK	300.8	0.831929	5.77854	7.53505e-09	2.66452e-07	ATPase phospholipid transporting 8B4 (putative) [Source:HGNC Symbol;Acc:HGNC:13536]
ENSSSCG00000003731	GAREM1	5.78524	CD21nB	1752.33	0.45137	10.6016	2.92956e-26	2.79364e-24	GRB2 associated regulator of MAPK1 subtype 1 [Source:HGNC Symbol;Acc:HGNC:26136]
ENSSSCG00000008703	ADRA2C	5.7932	CD8T	74.6	1.09945	4.35966	1.30267e-05	0.000126046	adrenoceptor alpha 2C [Source:HGNC Symbol;Acc:HGNC:283]
ENSSSCG00000010199	RET	5.79191	NK	56.8	0.707419	6.77379	1.25453e-11	7.08504e-10	ret proto-oncogene [Source:HGNC Symbol;Acc:HGNC:9967]
ENSSSCG00000016479	TRBV19	5.78881	CD4CD8T	345.467	0.418657	11.4385	2.68493e-30	9.18721e-28	T cell receptor beta variable 19 [Source:HGNC Symbol;Acc:HGNC:12194]
ENSSSCG00000007596	ENSSSCG00000007596	5.78829	CD21pB	42.4	1.36022	3.52023	0.000431169	0.00297345
ENSSSCG00000000092	NPTXR	5.78475	CD21nB	357.8	0.620154	7.71542	1.20583e-14	5.29382e-13	neuronal pentraxin receptor [Source:HGNC Symbol;Acc:HGNC:7954]
ENSSSCG00000003218	MYBPC2	5.76749	CD21nB	30.5333	3.66056	1.30239	0.192782	0.465702	myosin binding protein C, fast type [Source:HGNC Symbol;Acc:HGNC:755]
ENSSSCG00000037364	ENSSSCG00000037364	5.78409	CD8T	1395.53	0.704883	6.78706	1.14439e-11	3.6164e-10
ENSSSCG00000001849	ANPEP	5.78403	Myeloid	220.2	0.728653	6.56557	5.18327e-11	4.67459e-10	aminopeptidase N [Source:RefSeq peptide;Acc:NP_999442]
ENSSSCG00000002812	KIFC3	5.77828	Myeloid	104.867	0.709937	6.73057	1.69002e-11	1.59981e-10	kinesin family member C3 [Source:HGNC Symbol;Acc:HGNC:6326]
ENSSSCG00000029596	ENSSSCG00000029596	5.77698	SWC6gdT	15291	0.267873	17.833	3.91472e-71	4.55439e-67
ENSSSCG00000002084	ENSSSCG00000002084	5.77654	CD8T	363.733	0.752133	6.35066	2.1439e-10	5.64842e-09
ENSSSCG00000034660	CCR4	5.7765	CD4CD8T	1228.2	0.645784	7.39643	1.399e-13	9.92435e-12	C-C motif chemokine receptor 4 [Source:HGNC Symbol;Acc:HGNC:165]
ENSSSCG00000038420	PERP	5.77176	CD21pB	220.8	0.758222	6.29336	3.10676e-10	6.47744e-09	p53 apoptosis effector related to PMP-22 [Source:RefSeq peptide;Acc:NP_1231754]
ENSSSCG00000038126	MGAT3	5.76854	Myeloid	75.6	0.601495	7.92781	2.23052e-15	2.83916e-14	mannosyl (beta-1,4-)-glycoprotein beta-1,4-N-acetylglucosaminyltransferase [Source:HGNC Symbol;Acc:HGNC:746]
ENSSSCG00000032644	HLX	5.76841	Myeloid	92.1333	0.578663	8.2404	1.7163e-16	2.34085e-15	H2. like homeobox [Source:HGNC Symbol;Acc:HGNC:4978]
ENSSSCG00000033456	GPR157	5.76614	CD21nB	40.4667	1.18399	4.0255	5.68546e-05	0.000581747	G protein-coupled receptor 157 [Source:HGNC Symbol;Acc:HGNC:23687]
ENSSSCG00000026098	CMYA5	5.74444	CD21nB	226.867	0.663639	7.14913	8.73301e-13	3.26687e-11	cardiomyopathy-associated protein 5 [Source:RefSeq peptide;Acc:NP_1184236]
ENSSSCG00000032436	ENSSSCG00000032436	5.76372	Myeloid	231.2	0.427992	11.1304	8.925e-29	2.50201e-27
ENSSSCG00000036745	ENSSSCG00000036745	5.75887	CD8T	913.333	1.27055	3.74552	0.000180019	0.00124615
ENSSSCG00000009115	NDST3	5.75771	CD4CD8T	40.4667	0.884303	5.38018	7.44114e-08	1.67124e-06	N-deacetylase and N-sulfotransferase 3 [Source:HGNC Symbol;Acc:HGNC:7682]
ENSSSCG00000026042	ULBP1	5.75641	Myeloid	114	0.419239	11.3453	7.82286e-30	2.34565e-28	NKG2D ligand 1 precursor [Source:RefSeq peptide;Acc:NP_1435]
ENSSSCG00000016892	FST	5.75464	CD4CD8T	58.9333	0.852081	5.58003	2.40482e-08	6.05578e-07	follistatin precursor [Source:RefSeq peptide;Acc:NP_13662]
ENSSSCG00000035124	ILDR2	5.75308	Myeloid	51.3333	0.718212	6.61794	3.64241e-11	3.34722e-10	immunoglobulin like domain containing receptor 2 [Source:HGNC Symbol;Acc:HGNC:18131]
ENSSSCG00000016611	CADPS2	5.75126	Myeloid	114.4	0.555214	8.55753	1.15313e-17	1.69602e-16	calcium dependent secretion activator 2 [Source:HGNC Symbol;Acc:HGNC:1618]
ENSSSCG00000015324	GNG11	5.74587	Myeloid	237.533	0.708892	6.69477	2.16013e-11	2.02832e-10	G protein subunit gamma 11 [Source:HGNC Symbol;Acc:HGNC:443]
ENSSSCG00000003437	TNFRSF8	5.74573	Myeloid	20.1333	1.14007	4.16265	3.14575e-05	0.000148349	TNF receptor superfamily member 8 [Source:HGNC Symbol;Acc:HGNC:11923]
ENSSSCG00000009645	ADAMDEC1	5.73967	CD21nB	20.6	1.41306	3.35418	0.00079601	0.00576637	ADAM like decysin 1 [Source:HGNC Symbol;Acc:HGNC:16299]
ENSSSCG00000014184	PAM	5.74378	Myeloid	806.2	0.473226	10.0244	1.19136e-23	2.50639e-22	peptidylglycine alpha-amidating monooxygenase [Source:HGNC Symbol;Acc:HGNC:8596]
ENSSSCG00000015923	NOSTRIN	5.74329	CD4CD8T	64.3333	0.622221	7.62316	2.47548e-14	1.93287e-12	nitric oxide synthase trafficking [Source:HGNC Symbol;Acc:HGNC:223]
ENSSSCG00000013111	CD6	5.74274	CD4T	5872.87	0.388124	12.2197	2.44121e-34	1.03146e-31	CD6 molecule [Source:HGNC Symbol;Acc:HGNC:1691]
ENSSSCG00000035987	EHD3	5.74124	CD21pB	978.867	0.348476	13.6056	3.70815e-42	8.29628e-40	EH domain containing 3 [Source:HGNC Symbol;Acc:HGNC:3244]
ENSSSCG00000011750	PLD1	5.73482	CD21nB	197.867	0.54708	8.65472	4.94141e-18	2.93308e-16	phospholipase D1 [Source:RefSeq peptide;Acc:NP_1231518]
ENSSSCG00000015137	CRTAM	5.73867	CD8T	568.467	0.472908	10.0203	1.24171e-23	1.24258e-21	cytotoxic and regulatory T cell molecule [Source:HGNC Symbol;Acc:HGNC:24313]
ENSSSCG00000014899	PRCP	5.73741	Myeloid	2129.73	0.210651	22.4893	5.2794e-112	4.72466e-109	prolylcarboxypeptidase [Source:HGNC Symbol;Acc:HGNC:9344]
ENSSSCG00000040505	ENSSSCG00000040505	5.73673	CD4T	78.4	0.764323	6.19728	5.74458e-10	1.79055e-08
ENSSSCG00000031902	ENSSSCG00000031902	5.73569	CD8T	12349.5	0.484416	9.77608	1.42626e-22	1.30166e-20
ENSSSCG00000006648	CTSS	5.73534	Myeloid	20572.6	0.168257	28.1435	2.87651e-174	1.11551e-170	cathepsin S [Source:HGNC Symbol;Acc:HGNC:2545]
ENSSSCG00000025681	ENSSSCG00000025681	5.70883	CD21nB	12.6667	1.68134	2.80064	0.0051002	0.0277011
ENSSSCG00000029558	EXTL1	5.72999	SWC6gdT	42.1333	1.07285	4.4088	1.03945e-05	9.92857e-05	exostosin like glycosyltransferase 1 [Source:HGNC Symbol;Acc:HGNC:3515]
ENSSSCG00000006350	ENSSSCG00000006350	5.72979	Myeloid	1483.67	0.294824	16.0427	6.42469e-58	6.73377e-56	low affinity immunoglobulin gamma Fc region receptor II-b precursor [Source:RefSeq peptide;Acc:NP_128185]
ENSSSCG00000037539	SORCS2	5.72725	NK	125.4	1.26679	3.73167	0.000190217	0.00224441	sortilin related VPS1 domain containing receptor 2 [Source:HGNC Symbol;Acc:HGNC:16698]
ENSSSCG00000002056	TRAV41	5.72719	CD8T	27	1.63412	2.8928	0.00381821		T cell receptor alpha variable 41 [Source:HGNC Symbol;Acc:HGNC:12142]
ENSSSCG00000021846	EFHC2	5.72474	CD4CD8T	21.6667	1.71239	2.75915	0.00579519	0.0312135	EF-hand domain containing 2 [Source:HGNC Symbol;Acc:HGNC:26233]
ENSSSCG00000003578	FGR	5.72467	Myeloid	4583.8	0.438708	10.7695	4.79477e-27	1.20221e-25	FGR proto-oncogene, Src family tyrosine kinase [Source:HGNC Symbol;Acc:HGNC:3697]
ENSSSCG00000037964	GNG1	5.72436	Myeloid	2391.2	0.33198	14.2308	5.89775e-46	3.51869e-44	G protein subunit gamma 1 [Source:HGNC Symbol;Acc:HGNC:442]
ENSSSCG00000023045	BAHCC1	5.72408	NK	65.0667	1.68261	2.8076	0.00499125	0.0338517	BAH domain and coiled-coil containing 1 [Source:HGNC Symbol;Acc:HGNC:29279]
ENSSSCG00000036521	TNFSF13	5.72312	Myeloid	273.667	0.513827	9.19205	3.85438e-20	6.65309e-19	tumor necrosis factor ligand superfamily member 13 [Source:RefSeq peptide;Acc:NP_11616]
ENSSSCG00000012201	CXorf21	5.72189	CD21pB	484.933	0.471859	10.007	1.41977e-23	9.22768e-22	chromosome X open reading frame 21 [Source:HGNC Symbol;Acc:HGNC:25667]
ENSSSCG00000022512	TRDC	5.72155	CD8T	30681.6	0.555992	8.49212	2.02895e-17	1.1128e-15	T cell receptor delta constant [Source:HGNC Symbol;Acc:HGNC:12253]
ENSSSCG00000012467	KLHL4	5.71909	NK	47.6	1.10567	4.26808	1.97158e-05	0.000312074	kelch like family member 4 [Source:HGNC Symbol;Acc:HGNC:6355]
ENSSSCG00000035176	SEMA6B	5.71892	Myeloid	108	0.677828	6.96182	3.35914e-12	3.34019e-11	semaphorin 6B [Source:HGNC Symbol;Acc:HGNC:1739]
ENSSSCG00000033913	C1RL	5.71851	Myeloid	86.9333	0.485865	9.71157	2.69154e-22	5.23636e-21	complement C1r subcomponent like [Source:HGNC Symbol;Acc:HGNC:21265]
ENSSSCG00000036918	ENSSSCG00000036918	5.71434	CD4CD8T	222.733	0.736024	6.40514	1.50235e-10	6.027e-09
ENSSSCG00000032355	LY86	5.71207	Myeloid	5372.73	0.265823	17.7263	2.626e-70	4.30294e-68	lymphocyte antigen 86 precursor [Source:RefSeq peptide;Acc:NP_19884]
ENSSSCG00000013074	RAB3IL1	5.70624	CD21nB	50.7333	1.06414	4.42259	9.75245e-06	0.000122131	RAB3A interacting protein like 1 [Source:HGNC Symbol;Acc:HGNC:978]
ENSSSCG00000008432	STPG4	5.67815	CD21nB	71.5333	0.733793	6.3753	1.82609e-10	5.20704e-09	sperm-tail PG-rich repeat containing 4 [Source:HGNC Symbol;Acc:HGNC:2685]
ENSSSCG00000016892	FST	5.69984	CD4T	58.9333	0.852186	5.51504	3.48693e-08	7.81512e-07	follistatin precursor [Source:RefSeq peptide;Acc:NP_13662]
ENSSSCG00000021731	WWC2	5.69899	Myeloid	42.5333	1.08631	4.32566	1.52077e-05	7.47154e-05	WW and C2 domain containing 2 [Source:HGNC Symbol;Acc:HGNC:24148]
ENSSSCG00000008205	ENSSSCG00000008205	5.69886	NK	54.4667	1.07608	4.36664	1.26172e-05	0.00021151
ENSSSCG00000020864	VDR	5.69818	Myeloid	101.6	0.423181	11.1021	1.2258e-28	3.39548e-27	Vitamin D3 receptor [Source:UniProtKB/Swiss-Prot;Acc:A3RGC1]
ENSSSCG00000014203	ENSSSCG00000014203	5.69805	NK	180.8	0.791898	5.93265	2.9809e-09	1.12597e-07
ENSSSCG00000013642	PDE4A	5.69572	Myeloid	333.6	0.454319	10.3357	4.85641e-25	1.10135e-23	cAMP-specific 3',5'-cyclic phosphodiesterase 4A [Source:RefSeq peptide;Acc:NP_1116631]
ENSSSCG00000009874	RASAL1	5.68913	Myeloid	60.7333	0.691191	6.78413	1.16785e-11	1.12195e-10	RAS protein activator like 1 [Source:HGNC Symbol;Acc:HGNC:9873]
ENSSSCG00000034215	ENSSSCG00000034215	5.68856	NK	162.8	1.08168	4.33451	1.46082e-05	0.000241409
ENSSSCG00000039490	ENSSSCG00000039490	5.68823	NK	219.667	0.753412	6.22267	4.88754e-10	2.15385e-08
ENSSSCG00000036513	ENSSSCG00000036513	5.68768	CD4CD8T	158.067	0.650654	7.20457	5.82287e-13	3.72216e-11
ENSSSCG00000031465	PRRT1B	5.68753	CD21pB	26.3333	1.36229	3.44091	0.000579769	0.00383023	proline rich transmembrane protein 1B [Source:HGNC Symbol;Acc:HGNC:53642]
ENSSSCG00000006161	IL7	5.68548	CD21pB	101	0.608985	7.69391	1.42709e-14	4.62471e-13	Interleukin-7 [Source:UniProtKB/Swiss-Prot;Acc:Q9N2G6]
ENSSSCG00000032156	GPR146	5.68484	Myeloid	488.067	0.698115	6.71069	1.93702e-11	1.82325e-10	G protein-coupled receptor 146 [Source:HGNC Symbol;Acc:HGNC:21718]
ENSSSCG00000023662	CHST3	5.68425	Myeloid	145.4	0.622425	7.5258	5.23979e-14	6.0118e-13	carbohydrate sulfotransferase 3 [Source:HGNC Symbol;Acc:HGNC:1971]
ENSSSCG00000034565	ENSSSCG00000034565	5.68274	CD8T	440.4	0.802549	5.83484	5.38433e-09	1.15243e-07
ENSSSCG00000023584	ENSSSCG00000023584	5.68183	CD8T	4545.2	0.28705	16.3101	8.36347e-60	8.67368e-57
ENSSSCG00000013418	CFD	5.6679	CD21nB	5423	0.61454	7.59577	3.05974e-14	1.28509e-12	Complement factor D [Source:UniProtKB/Swiss-Prot;Acc:P51779]
ENSSSCG00000011712	P2RY14	5.67621	Myeloid	146.933	0.512519	9.12396	7.24252e-20	1.22292e-18	purinergic receptor P2Y14 [Source:HGNC Symbol;Acc:HGNC:16442]
ENSSSCG00000015589	VASH2	5.67449	Myeloid	84.0667	0.846484	5.52224	3.34706e-08	2.31508e-07	vasohibin 2 [Source:HGNC Symbol;Acc:HGNC:25723]
ENSSSCG00000032112	ENSSSCG00000032112	5.67281	CD4T	271.867	0.439274	10.6376	1.99222e-26	4.45633e-24
ENSSSCG00000015874	ACVR1	5.67009	Myeloid	123.133	0.759744	6.14693	7.89988e-10	6.37802e-09	activin A receptor type 1 [Source:HGNC Symbol;Acc:HGNC:171]
ENSSSCG00000015584	PROX1	5.66593	CD21nB	41.6667	3.66315	1.27375	0.202752	0.482179	prospero homeobox protein 1 [Source:RefSeq peptide;Acc:NP_1121962]
ENSSSCG00000008937	AMBN	5.6655	CD21nB	223.6	0.505261	9.23384	2.61091e-20	1.80806e-18	Ameloblastin [Source:UniProtKB/Swiss-Prot;Acc:Q28989]
ENSSSCG00000022361	ENSSSCG00000022361	5.64789	CD21nB	2148.4	0.434175	10.7051	9.63123e-27	9.65946e-25
ENSSSCG00000000588	PLEKHA5	5.66513	NK	127.8	0.848891	5.49556	3.89475e-08	1.15004e-06	pleckstrin homology domain containing A5 [Source:HGNC Symbol;Acc:HGNC:336]
ENSSSCG00000016687	ENSSSCG00000016687	5.66393	NK	567.8	0.971238	4.80205	1.5705e-06	3.42158e-05
ENSSSCG00000034219	TRBV3	5.66375	CD4CD8T	499	0.448884	10.3897	2.76333e-25	6.84013e-23	T cell receptor beta variable 3 (gene/pseudogene) [Source:HGNC Symbol;Acc:HGNC:12214]
ENSSSCG00000040548	ENSSSCG00000040548	5.66152	CD8T	1660.4	0.945079	4.93241	8.12213e-07	1.07992e-05
ENSSSCG00000011721	P2RY1	5.66058	Myeloid	173.2	0.5881	7.9248	2.28517e-15	2.90554e-14	purinergic receptor P2Y1 [Source:HGNC Symbol;Acc:HGNC:8539]
ENSSSCG00000011750	PLD1	5.65797	Myeloid	197.867	0.547169	8.51285	1.69709e-17	2.46799e-16	phospholipase D1 [Source:RefSeq peptide;Acc:NP_1231518]
ENSSSCG00000002443	TC2N	5.65765	CD8T	753.067	0.34751	13.4029	5.81367e-41	2.13943e-38	tandem C2 domains, nuclear [Source:HGNC Symbol;Acc:HGNC:19859]
ENSSSCG00000016687	ENSSSCG00000016687	5.65554	SWC6gdT	567.8	0.706967	6.58524	4.54166e-11	1.56788e-09
ENSSSCG00000036499	LMO3	5.64567	CD21nB	77.8667	0.755812	6.1466	7.91634e-10	2.0421e-08	LIM domain only protein 3 [Source:RefSeq peptide;Acc:NP_116155]
ENSSSCG00000037709	KCNA2	5.64757	SWC6gdT	66.1333	0.745722	6.23231	4.59621e-10	1.31705e-08	potassium voltage-gated channel subfamily A member 2 [Source:RefSeq peptide;Acc:NP_113888]
ENSSSCG00000029815	SRGAP1	5.64601	Myeloid	54.8667	0.690781	6.72574	1.74702e-11	1.65108e-10	SLIT-ROBO Rho GTPase activating protein 1 [Source:HGNC Symbol;Acc:HGNC:17382]
ENSSSCG00000004490	SETBP1	5.63106	CD21nB	64	0.842513	5.49672	3.86915e-08	7.8421e-07	SET binding protein 1 [Source:HGNC Symbol;Acc:HGNC:15573]
ENSSSCG00000002412	STON2	5.64475	Myeloid	74.4667	1.38307	3.35829	0.000784257	0.00295372	stonin 2 [Source:HGNC Symbol;Acc:HGNC:3652]
ENSSSCG00000017604	HLF	5.64306	CD4CD8T	230.8	0.413293	11.2343	2.76626e-29	9.19503e-27	HLF, PAR bZIP transcription factor [Source:HGNC Symbol;Acc:HGNC:4977]
ENSSSCG00000039574	ENSSSCG00000039574	5.64248	CD8T	224.867	2.02916	2.28788	0.0221443	0.0687222
ENSSSCG00000033153	ENSSSCG00000033153	5.64204	CD8T	46.4	0.705648	6.57842	4.75481e-11	1.37672e-09
ENSSSCG00000036233	ENSSSCG00000036233	5.63988	NK	242.733	0.883437	5.25207	1.50396e-07	3.93193e-06
ENSSSCG00000027877	TLR10	5.63601	CD21pB	672.4	0.395622	11.7183	1.02712e-31	1.14899e-29	toll-like receptor 1 [Source:RefSeq peptide;Acc:NP_12575]
ENSSSCG00000039875	NKD1	5.63336	CD4T	50.7333	0.767533	6.03669	1.57304e-09	4.50886e-08	naked cuticle homolog 1 [Source:HGNC Symbol;Acc:HGNC:1745]
ENSSSCG00000040098	ENSSSCG00000040098	5.62872	CD21nB	9.33333	2.43849	1.89819	0.0576712	0.186116
ENSSSCG00000010271	PRF1	5.63036	CD8T	2557.67	0.449473	10.3017	6.91913e-25	7.81519e-23	perforin 1 [Source:HGNC Symbol;Acc:HGNC:936]
ENSSSCG00000002662	C16orf74	5.63033	CD21pB	326.467	0.297552	15.5614	1.33151e-54	6.19631e-52	chromosome 16 open reading frame 74 [Source:HGNC Symbol;Acc:HGNC:23362]
ENSSSCG00000001469	SLA-DMB	5.62884	Myeloid	7936.73	0.287948	16.0753	3.80446e-58	4.06066e-56	MHC class II, DM beta precursor [Source:RefSeq peptide;Acc:NP_117179]
ENSSSCG00000026547	SLC45A3	5.61242	CD21nB	248.8	0.61749	7.46963	8.04223e-14	3.31785e-12	solute carrier family 45 member 3 [Source:HGNC Symbol;Acc:HGNC:8642]
ENSSSCG00000037214	ENSSSCG00000037214	5.62852	NK	23225.5	0.693812	6.67114	2.53825e-11	1.37991e-09
ENSSSCG00000004823	LRRK1	5.62758	Myeloid	907.933	0.510747	9.06042	1.29945e-19	2.16277e-18	leucine rich repeat kinase 1 [Source:HGNC Symbol;Acc:HGNC:1868]
ENSSSCG00000040640	ENSSSCG00000040640	5.62465	SWC6gdT	755.333	1.14634	4.03427	5.47727e-05	0.000427382
ENSSSCG00000034250	ENSSSCG00000034250	5.62399	SWC6gdT	89.9333	1.02685	4.50307	6.69774e-06	6.85929e-05
ENSSSCG00000015854	OCA2	5.62238	NK	188.533	0.666444	6.93589	4.03681e-12	2.44605e-10	P protein [Source:RefSeq peptide;Acc:NP_999259]
ENSSSCG00000023842	TRAT1	5.61948	CD4CD8T	4637.67	0.332564	13.8905	7.23505e-44	7.94747e-41	T cell receptor associated transmembrane adaptor 1 [Source:HGNC Symbol;Acc:HGNC:3698]
ENSSSCG00000012970	CTSW	5.61487	CD8T	18882.7	0.412818	11.179	5.16978e-29	9.07336e-27	cathepsin W [Source:HGNC Symbol;Acc:HGNC:2546]
ENSSSCG00000023842	TRAT1	5.61278	CD4T	4637.67	0.332565	13.8703	9.58539e-44	7.81072e-41	T cell receptor associated transmembrane adaptor 1 [Source:HGNC Symbol;Acc:HGNC:3698]
ENSSSCG00000022492	AMPD3	5.61118	CD21nB	886.133	0.506387	9.10603	8.54534e-20	5.81383e-18	adenosine monophosphate deaminase 3 [Source:HGNC Symbol;Acc:HGNC:47]
ENSSSCG00000039931	RF1876	5.61209	SWC6gdT	70.3333	0.930517	4.95648	7.17817e-07	9.73319e-06
ENSSSCG00000016676	INMT	5.59342	CD21nB	7.53333	2.92973	1.56787	0.116913	0.318464	indolethylamine N-methyltransferase [Source:RefSeq peptide;Acc:NP_1231662]
ENSSSCG00000003722	CDH2	5.6088	Myeloid	100.133	0.727081	6.33877	2.31607e-10	1.9625e-09	cadherin 2 [Source:HGNC Symbol;Acc:HGNC:1759]
ENSSSCG00000022206	UOX	5.60826	Myeloid	47.6	0.978806	4.70804	2.5011e-06	1.37643e-05	uricase precursor [Source:RefSeq peptide;Acc:NP_999435]
ENSSSCG00000014321	KLHL3	5.6082	Myeloid	92.2	0.869863	5.29761	1.1733e-07	7.62152e-07	kelch like family member 3 [Source:HGNC Symbol;Acc:HGNC:6354]
ENSSSCG00000036307	OAF	5.60732	Myeloid	176.333	0.497409	9.26263	1.99461e-20	3.48952e-19	out at first homolog [Source:HGNC Symbol;Acc:HGNC:28752]
ENSSSCG00000038489	BHLHA15	5.60596	CD21pB	256.933	0.603033	7.63798	2.20648e-14	6.95668e-13	basic helix-loop-helix family member a15 [Source:HGNC Symbol;Acc:HGNC:22265]
ENSSSCG00000009106	PDE5A	5.603	SWC6gdT	214.8	0.645928	7.12619	1.03185e-12	5.13014e-11	phosphodiesterase 5A [Source:HGNC Symbol;Acc:HGNC:8784]
ENSSSCG00000017466	CCR7	5.60238	CD4T	8903.13	0.529016	8.69988	3.32229e-18	3.13229e-16	C-C motif chemokine receptor 7 [Source:HGNC Symbol;Acc:HGNC:168]
ENSSSCG00000015089	JAML	5.60144	CD8T	3176.27	0.321529	14.3111	1.86578e-46	9.6749e-44	junctional adhesion molecule-like precursor [Source:RefSeq peptide;Acc:NP_1231659]
ENSSSCG00000012893	UNC93B1	5.59506	Myeloid	1977.53	0.210545	21.8246	1.35542e-105	8.76055e-103	unc-93 homolog B1, TLR signaling regulator [Source:HGNC Symbol;Acc:HGNC:13481]
ENSSSCG00000009314	FLT3	5.56534	CD21nB	590.2	0.644989	7.07817	1.46066e-12	5.36067e-11	fms related tyrosine kinase 3 [Source:HGNC Symbol;Acc:HGNC:3765]
ENSSSCG00000023904	CFAP57	5.59309	NK	45.4667	1.29852	3.53716	0.000404449	0.0042893	cilia and flagella associated protein 57 [Source:HGNC Symbol;Acc:HGNC:26485]
ENSSSCG00000007157	SLC4A11	5.58949	SWC6gdT	946.8	0.628087	7.30709	2.72989e-13	1.49106e-11	solute carrier family 4 member 11 [Source:HGNC Symbol;Acc:HGNC:16438]
ENSSSCG00000011514	MITF	5.58743	Myeloid	384.533	0.323982	14.1595	1.63063e-45	9.43819e-44	Sus scrofa microphthalmia-associated transcription factor-like (LOC12167244), mRNA. [Source:RefSeq mRNA;Acc:NM_1315782]
ENSSSCG00000010428	DKK1	5.58353	NK	30.7333	1.9968	2.29544	0.0217081	0.109141	dickkopf-related protein 1 precursor [Source:RefSeq peptide;Acc:NP_1138856]
ENSSSCG00000034219	TRBV3	5.58339	CD8T	499	0.448938	10.2094	1.79933e-24	1.95493e-22	T cell receptor beta variable 3 (gene/pseudogene) [Source:HGNC Symbol;Acc:HGNC:12214]
ENSSSCG00000011496	ADAMTS9	5.58175	CD4T	62.4	0.737767	6.2103	5.28832e-10	1.65285e-08	ADAM metallopeptidase with thrombospondin type 1 motif 9 [Source:HGNC Symbol;Acc:HGNC:1322]
ENSSSCG00000029668	IL2RB	5.58016	NK	10175.3	0.437235	10.4753	1.12204e-25	4.50132e-23	interleukin 2 receptor subunit beta [Source:HGNC Symbol;Acc:HGNC:69]
ENSSSCG00000031074	FAM11D	5.57988	CD4T	38.2	1.06976	4.28121	1.85882e-05	0.000220698	protein FAM11D isoform 1 [Source:RefSeq peptide;Acc:NP_12348]
ENSSSCG00000037319	PDCD1	5.5767	CD4CD8T	344.133	0.423202	10.8145	2.94014e-27	8.77067e-25	programmed cell death protein 1 precursor [Source:RefSeq peptide;Acc:NP_119138]
ENSSSCG00000040140	CD3E	5.57647	SWC6gdT	25628.6	0.942572	4.85529	1.20208e-06	1.53176e-05	T-cell surface glycoprotein CD3 epsilon chain precursor [Source:RefSeq peptide;Acc:NP_999392]
ENSSSCG00000015447	ENSSSCG00000015447	5.57275	CD4CD8T	267.6	0.426508	10.7214	8.07873e-27	2.23781e-24
ENSSSCG00000002817	DRC7	5.56997	Myeloid	22.3333	1.68164	2.71757	0.00657624	0.0205756	dynein regulatory complex subunit 7 [Source:HGNC Symbol;Acc:HGNC:25289]
ENSSSCG00000009468	KCTD12	5.56835	SWC6gdT	855.933	0.66901	6.82853	8.57882e-12	3.39476e-10	potassium channel tetramerization domain containing 12 [Source:HGNC Symbol;Acc:HGNC:14678]
ENSSSCG00000037970	SOX8	5.56543	NK	25.2667	1.51015	3.02317	0.00250139	0.0194657	SRY-box 8 [Source:HGNC Symbol;Acc:HGNC:1123]
ENSSSCG00000039175	MARCH11	5.55671	CD21nB	1844.53	0.364762	12.4923	8.2267e-36	1.4285e-33	membrane associated ring-CH-type finger 1 [Source:HGNC Symbol;Acc:HGNC:2677]
ENSSSCG00000031495	TRDV3	5.56276	SWC6gdT	199.867	1.66218	2.74504	0.00605036	0.0221074	T cell receptor delta variable 3 [Source:HGNC Symbol;Acc:HGNC:12264]
ENSSSCG00000007239	CCM2L	5.56134	Myeloid	103.133	0.663699	6.87261	6.30362e-12	6.15754e-11	CCM2 like scaffolding protein [Source:HGNC Symbol;Acc:HGNC:16153]
ENSSSCG00000039175	MARCH11	5.56011	CD21pB	1844.53	0.364761	12.5017	7.31172e-36	1.02487e-33	membrane associated ring-CH-type finger 1 [Source:HGNC Symbol;Acc:HGNC:2677]
ENSSSCG00000022230	CD9	5.5597	Myeloid	2640.47	0.19745	23.0929	5.45687e-118	6.34853e-115	CD9 antigen [Source:RefSeq peptide;Acc:NP_999171]
ENSSSCG00000011033	VIM	5.55799	Myeloid	42942.3	0.23875	19.091	2.99873e-81	7.75271e-79	Vimentin [Source:UniProtKB/Swiss-Prot;Acc:P2543]
ENSSSCG00000026742	BTK	5.54419	CD21nB	4618.8	0.433534	10.4817	1.04794e-25	9.67599e-24	tyrosine-protein kinase BTK [Source:RefSeq peptide;Acc:NP_12355]
ENSSSCG00000032715	CERS6	5.55663	CD8T	601.2	0.282231	16.145	1.23121e-58	1.17047e-55	ceramide synthase 6 [Source:HGNC Symbol;Acc:HGNC:23826]
ENSSSCG00000033721	ENSSSCG00000033721	5.55522	CD8T	25280.4	0.497504	9.15615	5.37805e-20	3.71835e-18
ENSSSCG00000033808	ENSSSCG00000033808	5.55493	NK	65.2667	1.25087	3.64142	0.00027114	0.00304777
ENSSSCG00000006901	EVI5	5.55107	Myeloid	223.4	0.537584	8.4658	2.54407e-17	3.66309e-16	ecotropic viral integration site 5 [Source:HGNC Symbol;Acc:HGNC:351]
ENSSSCG00000001572	FGD2	5.55028	CD21pB	1907	0.468652	9.70928	2.75269e-22	1.62562e-20	FYVE, RhoGEF and PH domain containing 2 [Source:HGNC Symbol;Acc:HGNC:3664]
ENSSSCG00000040579	ZNF683	5.54819	CD8T	3771.07	0.309345	14.7026	6.20017e-49	3.53658e-46	zinc finger protein 683 [Source:HGNC Symbol;Acc:HGNC:28495]
ENSSSCG00000024166	SLC2A6	5.54468	Myeloid	469.267	0.252495	17.9991	1.97917e-72	3.38612e-70	solute carrier family 2 member 6 [Source:HGNC Symbol;Acc:HGNC:1111]
ENSSSCG00000005743	VAV2	5.52782	CD21nB	2108.87	0.343008	13.2003	8.73686e-40	1.78324e-37	vav guanine nucleotide exchange factor 2 [Source:HGNC Symbol;Acc:HGNC:12658]
ENSSSCG00000002919	TYROBP	5.54072	NK	4903.13	1.20816	3.75837	0.000171027	0.00205763	TYRO protein tyrosine kinase-binding protein [Source:UniProtKB/Swiss-Prot;Acc:Q9TU45]
ENSSSCG00000001011	SERPINB1	5.53804	Myeloid	9309.67	0.34207	13.2664	3.62619e-40	1.7505e-38	serpin family B member 1 [Source:HGNC Symbol;Acc:HGNC:3311]
ENSSSCG00000009832	FAM19A	5.53716	Myeloid	44.6667	0.903344	5.02263	5.09695e-07	3.05659e-06	family with sequence similarity 19 member A [Source:HGNC Symbol;Acc:HGNC:2659]
ENSSSCG00000002090	ENSSSCG00000002090	5.5367	CD4CD8T	159.6	0.850691	5.33297	9.66217e-08	2.10505e-06
ENSSSCG00000036292	ENSSSCG00000036292	5.53624	CD4CD8T	82.5333	1.11984	4.05081	5.10414e-05	0.000570428
ENSSSCG00000036635	TRAV6	5.53558	CD4CD8T	68.0667	0.800479	5.66608	1.46099e-08	3.83684e-07	T cell receptor alpha variable 6 [Source:HGNC Symbol;Acc:HGNC:12144]
ENSSSCG00000014766	ENSSSCG00000014766	5.5354	SWC6gdT	291.467	0.789503	5.74463	9.21216e-09	1.98839e-07
ENSSSCG00000036063	LPAR6	5.53414	Myeloid	378.467	0.480611	9.43413	3.94264e-21	7.2348e-20	lysophosphatidic acid receptor 6 [Source:HGNC Symbol;Acc:HGNC:1552]
ENSSSCG00000022208	TNFRSF1B	5.5326	Myeloid	8025.33	0.266628	16.9997	8.24965e-65	1.12913e-62	tumor necrosis factor receptor superfamily member 1B precursor [Source:RefSeq peptide;Acc:NP_1991]
ENSSSCG00000035828	ARHGEF4	5.53206	CD8T	221.8	0.483025	9.38266	6.43265e-21	4.89225e-19	Rho guanine nucleotide exchange factor 4 [Source:HGNC Symbol;Acc:HGNC:684]
ENSSSCG00000035402	RGS9	5.52977	SWC6gdT	20.7333	1.22333	3.70283	0.000213211	0.00137882	regulator of G protein signaling 9 [Source:HGNC Symbol;Acc:HGNC:14]
ENSSSCG00000010044	ENSSSCG00000010044	5.5296	NK	12662.2	0.766453	5.90982	3.42481e-09	1.2853e-07
ENSSSCG00000002884	LSR	5.5295	CD21pB	22.2667	1.06101	4.26906	1.96301e-05	0.000192074	lipolysis stimulated lipoprotein receptor [Source:HGNC Symbol;Acc:HGNC:29572]
ENSSSCG00000004968	PAQR5	5.52803	Myeloid	36.1333	0.809477	5.59377	2.22196e-08	1.56954e-07	progestin and adipoQ receptor family member 5 [Source:HGNC Symbol;Acc:HGNC:29645]
ENSSSCG00000026423	SLC23A1	5.52365	CD21nB	142.4	0.772754	5.85393	4.80087e-09	1.10382e-07	solute carrier family 23 member 1 [Source:HGNC Symbol;Acc:HGNC:1974]
ENSSSCG00000036512	FGFRL1	5.5256	Myeloid	31.2667	0.894434	5.05974	4.19833e-07	2.54791e-06	fibroblast growth factor receptor like 1 [Source:HGNC Symbol;Acc:HGNC:3693]
ENSSSCG00000000601	PTPRO	5.52145	CD21nB	1005.53	0.530751	8.51897	1.60976e-17	9.22557e-16	protein tyrosine phosphatase, receptor type O [Source:HGNC Symbol;Acc:HGNC:9678]
ENSSSCG00000014149	MEF2C	5.51783	CD21nB	2813.4	0.573139	7.88261	3.20616e-15	1.49202e-13	myocyte-specific enhancer factor 2C [Source:RefSeq peptide;Acc:NP_1385]
ENSSSCG00000033189	FAM17A	5.5039	CD21nB	54.8	0.860342	5.23501	1.64973e-07	3.02251e-06	protein FAM17A [Source:RefSeq peptide;Acc:NP_1239135]
ENSSSCG00000005743	VAV2	5.51706	CD21pB	2108.87	0.34301	13.1689	1.32501e-39	2.48631e-37	vav guanine nucleotide exchange factor 2 [Source:HGNC Symbol;Acc:HGNC:12658]
ENSSSCG00000016567	STRIP2	5.51396	Myeloid	281	0.309393	14.5897	3.26392e-48	2.12136e-46	striatin interacting protein 2 [Source:HGNC Symbol;Acc:HGNC:2229]
ENSSSCG00000007541	PDGFA	5.51373	NK	336.333	0.858669	5.25666	1.46697e-07	3.87001e-06	platelet derived growth factor subunit A [Source:HGNC Symbol;Acc:HGNC:8799]
ENSSSCG00000026455	TMEM54	5.51272	CD21pB	25.3333	1.04926	4.30085	1.70147e-05	0.000168467	transmembrane protein 54 [Source:HGNC Symbol;Acc:HGNC:24143]
ENSSSCG00000028561	CD28	5.5118	CD4T	2304.13	0.261736	17.238	1.37792e-66	5.23976e-63	T-cell-specific surface glycoprotein CD28 precursor [Source:RefSeq peptide;Acc:NP_1274339]
ENSSSCG00000031145	ENSSSCG00000031145	5.51046	CD4T	49.3333	0.762257	5.91724	3.27389e-09	8.78789e-08
ENSSSCG00000014072	ENC1	5.50829	SWC6gdT	109.8	0.579865	7.77472	7.56143e-15	5.05573e-13	ectodermal-neural cortex 1 [Source:HGNC Symbol;Acc:HGNC:3345]
ENSSSCG00000040140	CD3E	5.50549	CD8T	25628.6	0.942573	4.77999	1.75305e-06	2.13207e-05	T-cell surface glycoprotein CD3 epsilon chain precursor [Source:RefSeq peptide;Acc:NP_999392]
ENSSSCG00000005191	MPDZ	5.49758	CD21nB	103.133	0.751475	5.985	2.16383e-09	5.27758e-08	multiple PDZ domain crumbs cell polarity complex component [Source:HGNC Symbol;Acc:HGNC:728]
ENSSSCG00000013111	CD6	5.50338	CD8T	5872.87	0.38814	11.6025	4.00391e-31	8.15654e-29	CD6 molecule [Source:HGNC Symbol;Acc:HGNC:1691]
ENSSSCG00000001752	CHRNA3	5.50191	NK	53.2667	1.13176	3.97778	6.95608e-05	0.000941012	cholinergic receptor nicotinic alpha 3 subunit [Source:HGNC Symbol;Acc:HGNC:1957]
ENSSSCG00000036061	ENSSSCG00000036061	5.50186	CD4T	46.8667	0.907493	4.96076	7.02168e-07	1.19024e-05
ENSSSCG00000031905	KCNS3	5.49264	CD21nB	38.6667	3.78177	1.18797	0.234844	0.537512	potassium voltage-gated channel subfamily S member 3 [Source:RefSeq peptide;Acc:NP_13861]
ENSSSCG00000002450	SLC24A4	5.49723	Myeloid	855.467	0.234102	19.2106	3.01846e-82	8.36114e-80	solute carrier family 24 member 4 [Source:HGNC Symbol;Acc:HGNC:1978]
ENSSSCG00000001076	RNF144B	5.49471	Myeloid	162.2	0.537374	8.36422	6.05159e-17	8.5132e-16	ring finger protein 144B [Source:HGNC Symbol;Acc:HGNC:21578]
ENSSSCG00000026302	ENSSSCG00000026302	5.49353	NK	3443.73	0.552862	8.12777	4.37272e-16	4.93905e-14
ENSSSCG00000036628	ENSSSCG00000036628	5.49324	NK	71.4667	5.34977	0.839895	0.400967	0.839455
ENSSSCG00000009784	ABCB9	5.49018	CD21nB	237.533	0.413453	10.8602	1.78362e-27	1.88642e-25	ATP binding cassette subfamily B member 9 [Source:HGNC Symbol;Acc:HGNC:5]
ENSSSCG00000012300	FOXP3	5.49231	CD4CD8T	296.2	0.610323	7.36054	1.83166e-13	1.29149e-11	forkhead box protein P3 [Source:RefSeq peptide;Acc:NP_112191]
ENSSSCG00000039573	SLPI	5.481	CD21nB	84.7333	1.02062	4.39045	1.13115e-05	0.000139405	antileukoproteinase [Source:RefSeq peptide;Acc:NP_99935]
ENSSSCG00000008349	CNRIP1	5.48997	Myeloid	51.7333	0.931069	4.82238	1.41855e-06	8.03084e-06	cannabinoid receptor interacting protein 1 [Source:HGNC Symbol;Acc:HGNC:24546]
ENSSSCG00000010278	ENSSSCG00000010278	5.48891	Myeloid	253.867	0.546518	8.21366	2.14545e-16	2.89897e-15
ENSSSCG00000013074	RAB3IL1	5.48712	CD21pB	50.7333	1.06507	4.21298	2.52027e-05	0.000241324	RAB3A interacting protein like 1 [Source:HGNC Symbol;Acc:HGNC:978]
ENSSSCG00000008171	NPAS2	5.48636	CD4T	113.933	0.67895	6.60779	3.90093e-11	1.47662e-09	neuronal PAS domain protein 2 [Source:HGNC Symbol;Acc:HGNC:7895]
ENSSSCG00000015652	IL1	5.48636	Myeloid	46.3333	0.82895	5.4121	6.22902e-08	4.18167e-07	Interleukin-1 [Source:UniProtKB/Swiss-Prot;Acc:Q2955]
ENSSSCG00000038282	ENSSSCG00000038282	5.48516	NK	101.667	0.950113	4.72065	2.35087e-06	4.85791e-05
ENSSSCG00000036550	ENSSSCG00000036550	5.48144	SWC6gdT	167.733	0.98886	4.53193	5.84467e-06	6.12007e-05
ENSSSCG00000038138	TFEC	5.48044	CD21nB	212.933	0.62879	7.12549	1.0371e-12	3.85482e-11	transcription factor EC [Source:HGNC Symbol;Acc:HGNC:11754]
ENSSSCG00000009457	DACH1	5.48054	Myeloid	45.0667	0.708888	6.32052	2.60687e-10	2.1993e-09	dachshund family transcription factor 1 [Source:HGNC Symbol;Acc:HGNC:2663]
ENSSSCG00000036050	CD32	5.48046	Myeloid	554.2	0.374373	11.9679	5.23428e-33	1.81237e-31	CD32 antigen [Source:UniProtKB/Swiss-Prot;Acc:A8WH75]
ENSSSCG00000033062	RF1874	5.48045	SWC6gdT	19.8	1.34639	3.32775	0.000875518	0.00444794
ENSSSCG00000031715	CARD9	5.47744	CD21nB	1053.47	1.14764	3.90141	9.56329e-05	0.000920259	caspase recruitment domain family member 9 [Source:HGNC Symbol;Acc:HGNC:16391]
ENSSSCG00000034118	ENSSSCG00000034118	5.47863	CD8T	211	0.54853	8.1648	3.21977e-16	1.57644e-14
ENSSSCG00000012053	CBR3	5.47132	CD21nB	224.2	0.562399	7.95045	1.85842e-15	8.89133e-14	carbonyl reductase [Source:RefSeq peptide;Acc:NP_1231661]
ENSSSCG00000037306	ENSSSCG00000037306	5.47506	CD4CD8T	102.2	0.958223	4.67016	3.00963e-06	4.6071e-05
ENSSSCG00000017473	TOP2A	5.47411	NK	3190.4	0.602402	7.42711	1.10999e-13	8.4403e-12	DNA topoisomerase 2-alpha [Source:UniProtKB/Swiss-Prot;Acc:O46374]
ENSSSCG00000039621	ENSSSCG00000039621	5.47134	SWC6gdT	186.533	1.11433	4.01257	6.00614e-05	0.000462445
ENSSSCG00000004139	ADGRG6	5.45201	CD21nB	67	0.703952	6.32431	2.54372e-10	7.07981e-09	adhesion G protein-coupled receptor G6 [Source:HGNC Symbol;Acc:HGNC:13841]
ENSSSCG00000040989	GPRC5C	5.47052	Myeloid	22.6667	1.04781	4.26652	1.98542e-05	9.62032e-05	G protein-coupled receptor class C group 5 member C [Source:HGNC Symbol;Acc:HGNC:1339]
ENSSSCG00000014048	HK3	5.46938	Myeloid	3551.33	0.28813	15.5117	2.89178e-54	2.60799e-52	hexokinase 3 [Source:HGNC Symbol;Acc:HGNC:4925]
ENSSSCG00000008943	SLC4A4	5.46853	SWC6gdT	1028	0.315612	14.1583	1.65993e-45	2.75881e-42	electrogenic sodium bicarbonate cotransporter 1 [Source:RefSeq peptide;Acc:NP_12574]
ENSSSCG00000036918	ENSSSCG00000036918	5.46798	CD4T	222.733	0.736237	6.06867	1.28971e-09	3.72482e-08
ENSSSCG00000028295	ENSSSCG00000028295	5.46665	SWC6gdT	175.067	0.715648	6.2414	4.33671e-10	1.24884e-08
ENSSSCG00000015584	PROX1	5.46664	Myeloid	41.6667	3.66349	1.21923	0.222756	0.458837	prospero homeobox protein 1 [Source:RefSeq peptide;Acc:NP_1121962]
ENSSSCG00000013101	ENSSSCG00000013101	5.46568	CD21pB	301.733	0.775059	5.76172	8.32592e-09	1.43928e-07
ENSSSCG00000006289	F5	5.46373	Myeloid	1234.07	0.38565	11.5746	5.54453e-31	1.76243e-29	coagulation factor V precursor [Source:RefSeq peptide;Acc:NP_999285]
ENSSSCG00000009283	TNFRSF19	5.4637	Myeloid	165.267	0.407506	10.9537	6.3799e-28	1.68308e-26	TNF receptor superfamily member 19 [Source:HGNC Symbol;Acc:HGNC:11915]
ENSSSCG00000007978	ENSSSCG00000007978	5.46272	NK	10070.1	1.78308	2.50281	0.012321	0.0693818
ENSSSCG00000012238	ENSSSCG00000012238	5.46236	SWC6gdT	859.267	1.33581	3.34056	0.000836094	0.00428885
ENSSSCG00000035898	ENSSSCG00000035898	5.46228	CD8T	99.4667	0.528541	8.44262	3.10291e-17	1.67763e-15
ENSSSCG00000003286	ENSSSCG00000003286	5.46188	Myeloid	29.8667	1.06342	4.19579	2.71927e-05	0.000129232
ENSSSCG00000009148	LEF1	5.46149	CD4T	11414.1	0.207004	21.5527	4.99141e-103	5.6942e-99	lymphoid enhancer-binding factor 1 [Source:RefSeq peptide;Acc:NP_1123439]
ENSSSCG00000017920	ENSSSCG00000017920	5.45953	Myeloid	156.533	0.464252	9.60584	7.55386e-22	1.43597e-20	C-X-C motif chemokine 16 precursor [Source:RefSeq peptide;Acc:NP_998976]
ENSSSCG00000017342	KIF18B	5.45616	NK	196.267	0.740193	6.02027	1.7413e-09	6.86723e-08	kinesin family member 18B [Source:HGNC Symbol;Acc:HGNC:2712]
ENSSSCG00000006398	SLAMF8	5.45546	Myeloid	30	0.790446	5.63665	1.73393e-08	1.23986e-07	SLAM family member 8 [Source:HGNC Symbol;Acc:HGNC:21391]
ENSSSCG00000025993	SGPP2	5.45313	CD4T	913.8	0.607042	7.33578	2.20436e-13	1.2267e-11	sphingosine-1-phosphate phosphatase 2 [Source:HGNC Symbol;Acc:HGNC:19953]
ENSSSCG00000002099	ENSSSCG00000002099	5.45221	CD8T	185.667	1.8151	2.45287	0.0141721	0.0479038
ENSSSCG00000031653	DOK3	5.45142	CD21nB	404.6	0.326699	13.6254	2.82764e-42	7.3104e-40	docking protein 3 [Source:HGNC Symbol;Acc:HGNC:24583]
ENSSSCG00000002554	PLD4	5.44881	CD21nB	3656	0.33927	13.1129	2.77831e-39	5.47845e-37	phospholipase D family member 4 [Source:HGNC Symbol;Acc:HGNC:23792]
ENSSSCG00000008157	IL18RAP	5.45025	CD8T	142.333	0.863097	5.15613	2.52102e-07	3.83976e-06	interleukin 18 receptor accessory protein [Source:HGNC Symbol;Acc:HGNC:5989]
ENSSSCG00000012643	SH2D1A	5.44914	CD8T	3462.6	0.264396	16.8276	1.53293e-63	3.06846e-60	SH2 domain-containing protein 1A [Source:RefSeq peptide;Acc:NP_172143]
ENSSSCG00000024429	SIDT1	5.44353	CD21nB	504.467	1.22559	3.62563	0.000288254	0.00240186	SID1 transmembrane family member 1 [Source:HGNC Symbol;Acc:HGNC:25967]
ENSSSCG00000023993	CD96	5.44806	NK	1421.2	0.490356	9.07109	1.17836e-19	2.24737e-17	T-cell surface protein tactile [Source:RefSeq peptide;Acc:NP_12349]
ENSSSCG00000012300	FOXP3	5.4466	CD4T	296.2	0.610347	7.28537	3.20789e-13	1.74265e-11	forkhead box protein P3 [Source:RefSeq peptide;Acc:NP_112191]
ENSSSCG00000011207	SGO1	5.44652	NK	251.8	0.690726	6.43746	1.21491e-10	5.93878e-09	shugoshin 1 [Source:HGNC Symbol;Acc:HGNC:2588]
ENSSSCG00000026210	ENSSSCG00000026210	5.4357	CD21nB	2986.8	0.439916	10.0831	6.56481e-24	5.4946e-22
ENSSSCG00000031796	ENSSSCG00000031796	5.44269	Myeloid	16.3333	1.33513	3.32753	0.000876183	0.0032588
ENSSSCG00000021588	DAPK2	5.44181	NK	685.933	0.684198	6.49199	8.47081e-11	4.28476e-09	death-associated protein kinase 2 [Source:RefSeq peptide;Acc:NP_123492]
ENSSSCG00000009229	ARHGAP24	5.44166	CD21pB	532.6	0.432921	10.2597	1.06994e-24	7.40933e-23	Rho GTPase activating protein 24 [Source:HGNC Symbol;Acc:HGNC:25361]
ENSSSCG00000004535	TCF4	5.44145	Myeloid	977.2	0.307923	14.4239	3.66133e-47	2.32765e-45	transcription factor 4 [Source:HGNC Symbol;Acc:HGNC:11634]
ENSSSCG00000023993	CD96	5.43986	CD8T	1421.2	0.350911	12.6524	1.08518e-36	3.17429e-34	T-cell surface protein tactile [Source:RefSeq peptide;Acc:NP_12349]
ENSSSCG00000036061	ENSSSCG00000036061	5.43856	CD8T	46.8667	0.907714	4.88982	1.00928e-06	1.31287e-05
ENSSSCG00000004587	MYO1E	5.43845	NK	749.733	0.740209	5.99621	2.01976e-09	7.83123e-08	myosin IE [Source:HGNC Symbol;Acc:HGNC:7599]
ENSSSCG00000015917	XIRP2	5.43076	CD21nB	51.7333	1.05704	4.19167	2.76905e-05	0.000306228	xin actin binding repeat containing 2 [Source:HGNC Symbol;Acc:HGNC:1433]
ENSSSCG00000031374	ENSSSCG00000031374	5.43455	CD8T	31.7333	1.25148	3.54344	0.000394945
ENSSSCG00000025049	CYBRD1	5.43442	Myeloid	3996	0.316342	14.0178	1.21342e-44	6.81979e-43	cytochrome b reductase 1 [Source:RefSeq peptide;Acc:NP_1121924]
ENSSSCG00000013237	SPI1	5.40787	CD21nB	3967.47	0.444926	9.90697	3.88244e-23	3.09372e-21	transcription factor PU.1 [Source:RefSeq peptide;Acc:NP_11865]
ENSSSCG00000023045	BAHCC1	5.43002	Myeloid	65.0667	1.21208	3.65488	0.000257304	0.00105367	BAH domain and coiled-coil containing 1 [Source:HGNC Symbol;Acc:HGNC:29279]
ENSSSCG00000039581	ENSSSCG00000039581	5.42825	CD4T	9576.4	0.401769	11.0219	2.99703e-28	7.59781e-26
ENSSSCG00000026004	MSRB3	5.42823	CD8T	86.5333	0.508864	8.70218	3.25556e-18	1.9144e-16	methionine sulfoxide reductase B3 [Source:HGNC Symbol;Acc:HGNC:27375]
ENSSSCG00000021656	ENSSSCG00000021656	5.4254	CD4T	67.9333	0.697201	6.34738	2.19012e-10	7.39199e-09
ENSSSCG00000006982	ZDHHC2	5.42316	NK	192.333	0.917783	4.8194	1.43993e-06	3.16079e-05	zinc finger DHHC-type containing 2 [Source:HGNC Symbol;Acc:HGNC:18469]
ENSSSCG00000010862	CDC42BPA	5.4216	NK	300.267	0.822647	5.37484	7.66504e-08	2.14363e-06	CDC42 binding protein kinase alpha [Source:HGNC Symbol;Acc:HGNC:1737]
ENSSSCG00000021866	EDDM3B	5.42005	Myeloid	417.667	0.541841	8.15747	3.42113e-16	4.53836e-15	epididymal secretory protein E3-beta precursor [Source:RefSeq peptide;Acc:NP_12314]
ENSSSCG00000013307	LMO2	5.41977	CD21pB	1212.33	0.27955	15.8103	2.641e-56	1.46311e-53	LIM domain only 2 [Source:HGNC Symbol;Acc:HGNC:6642]
ENSSSCG00000028635	ENSSSCG00000028635	5.41636	Myeloid	72.1333	0.507676	8.69917	3.34332e-18	5.12466e-17
ENSSSCG00000029596	ENSSSCG00000029596	5.4157	CD8T	15291	0.267883	16.4837	4.8028e-61	6.08781e-58
ENSSSCG00000003917	TESK2	5.41228	NK	805.133	0.472693	9.33435	1.01616e-20	2.18925e-18	testis-specific kinase 2 [Source:HGNC Symbol;Acc:HGNC:11732]
ENSSSCG00000001458	ENSSSCG00000001458	5.41221	CD21pB	231.8	0.526682	8.37736	5.41287e-17	2.19419e-15
ENSSSCG00000036050	CD32	5.41113	CD21pB	554.2	0.374408	11.7816	4.85592e-32	5.64937e-30	CD32 antigen [Source:UniProtKB/Swiss-Prot;Acc:A8WH75]
ENSSSCG00000002443	TC2N	5.4106	CD4CD8T	753.067	0.347657	12.6867	7.01156e-37	3.39886e-34	tandem C2 domains, nuclear [Source:HGNC Symbol;Acc:HGNC:19859]
ENSSSCG00000016444	TMEM176B	5.41046	Myeloid	62.4667	0.845093	5.2189	1.79988e-07	1.14238e-06	transmembrane protein 176B [Source:HGNC Symbol;Acc:HGNC:29596]
ENSSSCG00000024668	KLK1	5.41042	CD21pB	54.2667	0.644289	6.8454	7.62642e-12	1.89181e-10	kallikrein-1 precursor [Source:RefSeq peptide;Acc:NP_11911]
ENSSSCG00000037775	ENSSSCG00000037775	5.40105	CD21nB	74727.1	0.262956	16.7368	7.0651e-63	5.47969e-60
ENSSSCG00000033721	ENSSSCG00000033721	5.40782	CD4CD8T	25280.4	0.497506	8.85984	8.01291e-19	1.18003e-16
ENSSSCG00000004022	RPS6KA2	5.40548	Myeloid	99.5333	0.524414	8.40076	4.43593e-17	6.27829e-16	ribosomal protein S6 kinase A2 [Source:HGNC Symbol;Acc:HGNC:1431]
ENSSSCG00000035297	ISG12(A)	5.40276	Myeloid	16.7333	1.26103	3.49141	0.000480481	0.00188529	uncharacterized protein LOC115392 [Source:RefSeq peptide;Acc:NP_118585]
ENSSSCG00000009097	ANXA5	5.4018	Myeloid	3806.27	0.469925	9.36702	7.46069e-21	1.33947e-19	annexin A5 [Source:HGNC Symbol;Acc:HGNC:543]
ENSSSCG00000013337	BBOX1	5.35925	CD21nB	181.467	0.942003	4.62764	3.69851e-06	5.05029e-05	gamma-butyrobetaine hydroxylase 1 [Source:HGNC Symbol;Acc:HGNC:964]
ENSSSCG00000023842	TRAT1	5.39607	NK	4637.67	0.460478	9.54675	1.33827e-21	3.05284e-19	T cell receptor associated transmembrane adaptor 1 [Source:HGNC Symbol;Acc:HGNC:3698]
ENSSSCG00000006374	CD244	5.39591	Myeloid	1450.4	0.604864	7.26759	3.65959e-13	3.94951e-12	CD244 molecule [Source:HGNC Symbol;Acc:HGNC:18171]
ENSSSCG00000031752	ENSSSCG00000031752	5.39582	CD8T	208.667	0.634773	6.92502	4.3592e-12	1.44985e-10
ENSSSCG00000038885	ENSSSCG00000038885	5.39151	CD4T	143.467	0.945131	4.64645	3.37695e-06	4.88887e-05
ENSSSCG00000022492	AMPD3	5.38947	Myeloid	886.133	0.506446	8.6672	4.42873e-18	6.70884e-17	adenosine monophosphate deaminase 3 [Source:HGNC Symbol;Acc:HGNC:47]
ENSSSCG00000031902	ENSSSCG00000031902	5.38876	CD4T	12349.5	0.484424	9.05976	1.3074e-19	1.43411e-17
ENSSSCG00000016031	CALCRL	5.38759	Myeloid	418.733	0.525128	8.35528	6.52796e-17	9.17225e-16	calcitonin gene-related peptide type 1 receptor precursor [Source:RefSeq peptide;Acc:NP_99926]
ENSSSCG00000000959	ENSSSCG00000000959	5.38535	Myeloid	37.2667	1.1658	3.76165	0.000168799	0.000713333
ENSSSCG00000000137	NCF4	5.38341	CD21pB	3095.27	0.193821	22.6158	3.02869e-113	1.17452e-109	neutrophil cytosolic factor 4 [Source:HGNC Symbol;Acc:HGNC:7662]
ENSSSCG00000016475	ENSSSCG00000016475	5.37957	CD8T	6325.07	0.456813	9.58723	9.04777e-22	7.42568e-20
ENSSSCG00000040811	ENSSSCG00000040811	5.37935	Myeloid	1128.27	0.464727	9.4235	4.36309e-21	7.96864e-20
ENSSSCG00000010497	ENSSSCG00000010497	5.3752	Myeloid	517.8	0.308137	14.1989	9.30645e-46	5.44076e-44	ectonucleoside triphosphate diphosphohydrolase 1 [Source:RefSeq peptide;Acc:NP_999318]
ENSSSCG00000008392	BCL11A	5.37491	Myeloid	918.467	0.398431	10.9803	4.75109e-28	1.28246e-26	B-cell lymphoma/leukemia 11A [Source:RefSeq peptide;Acc:NP_1284563]
ENSSSCG00000011416	DOCK3	5.37307	CD4T	127.4	0.706054	6.19368	5.8776e-10	1.82702e-08	dedicator of cytokinesis 3 [Source:HGNC Symbol;Acc:HGNC:2989]
ENSSSCG00000011455	CACNA1D	5.36907	Myeloid	31.7333	1.28356	3.40387	0.000664376	0.00254674	calcium voltage-gated channel subunit alpha1 D [Source:HGNC Symbol;Acc:HGNC:1391]
ENSSSCG00000025652	CDH1	5.36886	CD8T	446.733	0.408278	10.7007	1.01022e-26	1.44058e-24	cadherin-1 precursor [Source:RefSeq peptide;Acc:NP_1156532]
ENSSSCG00000006796	CHI3L2	5.3679	Myeloid	159.267	0.330585	13.2126	7.41924e-40	3.53752e-38	chitinase 3 like 2 [Source:HGNC Symbol;Acc:HGNC:1933]
ENSSSCG00000001453	HLA-DRA	5.36534	CD21pB	52678.1	0.344654	12.6659	9.14054e-37	1.43704e-34	MHC class II DR-alpha precursor [Source:RefSeq peptide;Acc:NP_117178]
ENSSSCG00000000907	PLXNC1	5.36493	Myeloid	4466.53	0.334853	13.0353	7.70196e-39	3.54168e-37	plexin C1 [Source:HGNC Symbol;Acc:HGNC:916]
ENSSSCG00000016902	ENSSSCG00000016902	5.36473	CD8T	79.3333	0.744197	5.86502	4.49082e-09	9.77696e-08	granzyme A precursor [Source:RefSeq peptide;Acc:NP_1137181]
ENSSSCG00000039362	ENSSSCG00000039362	5.36293	CD8T	311.067	0.889997	4.90219	9.4776e-07	1.23849e-05
ENSSSCG00000002662	C16orf74	5.34017	CD21nB	326.467	0.297847	14.5718	4.2443e-48	1.64594e-45	chromosome 16 open reading frame 74 [Source:HGNC Symbol;Acc:HGNC:23362]
ENSSSCG00000037539	SORCS2	5.3591	SWC6gdT	125.4	0.917004	4.75363	1.99798e-06	2.35663e-05	sortilin related VPS1 domain containing receptor 2 [Source:HGNC Symbol;Acc:HGNC:16698]
ENSSSCG00000036292	ENSSSCG00000036292	5.35782	CD4T	82.5333	1.12008	3.89065	9.9976e-05	0.000964912
ENSSSCG00000040415	ENSSSCG00000040415	5.35721	CD8T	65.2667	0.750169	5.80831	6.31066e-09	1.33318e-07
ENSSSCG00000009092	TRPC3	5.35694	SWC6gdT	752.4	0.708191	6.15222	7.6407e-10	2.06246e-08	short transient receptor potential channel 3 [Source:RefSeq peptide;Acc:NP_1139221]
ENSSSCG00000001453	HLA-DRA	5.35269	Myeloid	52678.1	0.344654	12.6292	1.45819e-36	5.99456e-35	MHC class II DR-alpha precursor [Source:RefSeq peptide;Acc:NP_117178]
ENSSSCG00000006087	CPQ	5.34769	NK	37.5333	1.87574	2.31786	0.0204572	0.104066	carboxypeptidase Q precursor [Source:RefSeq peptide;Acc:NP_12362]
ENSSSCG00000009468	KCTD12	5.34226	Myeloid	855.933	0.669054	6.49016	8.57479e-11	7.59201e-10	potassium channel tetramerization domain containing 12 [Source:HGNC Symbol;Acc:HGNC:14678]
ENSSSCG00000007423	UBE2C	5.34174	NK	688.533	0.566779	7.66038	1.85378e-14	1.57422e-12	ubiquitin conjugating enzyme E2 C [Source:HGNC Symbol;Acc:HGNC:15937]
ENSSSCG00000004018	AFDN	5.34018	CD4T	76	0.696583	6.23067	4.64455e-10	1.46368e-08	afadin, adherens junction formation factor [Source:HGNC Symbol;Acc:HGNC:7137]
ENSSSCG00000039946	CD34	5.33345	CD21nB	71.6	0.59324	7.30471	2.77863e-13	1.10329e-11	hematopoietic progenitor cell antigen CD34 precursor [Source:RefSeq peptide;Acc:NP_999251]
ENSSSCG00000007552	ENSSSCG00000007552	5.3385	NK	63.4	0.747674	5.80266	6.52703e-09	2.32931e-07
ENSSSCG00000017754	ENSSSCG00000017754	5.33649	Myeloid	1696.13	0.452406	9.5854	9.21015e-22	1.73946e-20	galectin-9 isoform 5 [Source:RefSeq peptide;Acc:NP_13359]
ENSSSCG00000033120	PALM2	5.33527	CD21pB	444.6	0.687755	6.30351	2.90977e-10	6.08854e-09	A-kinase anchor protein 2 [Source:RefSeq peptide;Acc:NP_119111]
ENSSSCG00000026326	CCNF	5.33448	NK	173.2	0.84252	5.14466	2.68004e-07	6.6909e-06	cyclin F [Source:HGNC Symbol;Acc:HGNC:1591]
ENSSSCG00000030681	MYBPH	5.31986	CD21nB	110.333	4.22316	1.0229	0.306355	0.652747	myosin-binding protein H [Source:RefSeq peptide;Acc:NP_128186]
ENSSSCG00000039708	KLRB1	5.33173	CD8T	860.6	0.475875	9.10266	8.81474e-20	5.98563e-18	killer cell lectin like receptor B1 [Source:HGNC Symbol;Acc:HGNC:6373]
ENSSSCG00000008213	CD8B	5.33104	NK	3285.47	0.543281	7.97199	1.56134e-15	1.59339e-13	T-cell surface glycoprotein CD8 beta chain precursor [Source:RefSeq peptide;Acc:NP_1335699]
ENSSSCG00000032019	DNASE1L3	5.33091	Myeloid	41.0667	1.22499	3.53548	0.000407032	0.00161784	deoxyribonuclease 1 like 3 [Source:HGNC Symbol;Acc:HGNC:2959]
ENSSSCG00000032902	KLK7	5.32949	SWC6gdT	1458.33	1.18903	3.6412	0.000271368	0.00170194	kallikrein-7 precursor [Source:RefSeq peptide;Acc:NP_1182273]
ENSSSCG00000036511	RF1848	5.32842	CD4CD8T	70.9333	3.3826	1.27961	0.200682	0.450634
ENSSSCG00000015879	DAPL1	5.32813	CD8T	2374	0.62342	6.94256	3.85047e-12	1.29576e-10	death-associated protein-like 1 [Source:RefSeq peptide;Acc:NP_117213]
ENSSSCG00000007478	ATP9A	5.32634	NK	188.467	1.11517	3.87953	0.000104659	0.00133217	probable phospholipid-transporting ATPase IIA [Source:RefSeq peptide;Acc:NP_118144]
ENSSSCG00000001472	SLA-DOA	5.31986	CD21nB	1743.6	0.2141	20.1768	1.565e-90	1.82072e-86	SLA class II histocompatibility antigen, DO alpha chain precursor [Source:RefSeq peptide;Acc:NP_117272]
ENSSSCG00000031831	CADM1	5.3152	CD21nB	293.133	0.546512	7.89589	2.88259e-15	1.34683e-13	cell adhesion molecule 1 [Source:HGNC Symbol;Acc:HGNC:5951]
ENSSSCG00000025592	TP63	5.31894	NK	25	5.87092	0.735648	0.461945	0.916797	tumor protein p63 [Source:HGNC Symbol;Acc:HGNC:15979]
ENSSSCG00000036513	ENSSSCG00000036513	5.31656	CD4T	158.067	0.651101	6.62964	3.36511e-11	1.27964e-09
ENSSSCG00000033093	RGS6	5.31558	CD21pB	26.7333	1.08911	3.96247	7.41787e-05	0.000643066	regulator of G protein signaling 6 [Source:HGNC Symbol;Acc:HGNC:12]
ENSSSCG00000001457	SLA-DQB1	5.31532	CD21pB	27831.5	0.279361	15.4471	7.88901e-54	3.53003e-51	SLA class II histocompatibility antigen, DQ haplotype C beta chain precursor [Source:RefSeq peptide;Acc:NP_117166]
ENSSSCG00000029370	ENSSSCG00000029370	5.30828	CD21nB	47	1.35502	3.17949	0.00147533	0.00982484
ENSSSCG00000002554	PLD4	5.31301	CD21pB	3656	0.339289	12.7119	5.07741e-37	8.09185e-35	phospholipase D family member 4 [Source:HGNC Symbol;Acc:HGNC:23792]
ENSSSCG00000002292	PLEKHH1	5.31073	SWC6gdT	833.133	0.625965	6.88654	5.71675e-12	2.35013e-10	pleckstrin homology, MyTH4 and FERM domain containing H1 [Source:HGNC Symbol;Acc:HGNC:17733]
ENSSSCG00000037885	ENSSSCG00000037885	5.30965	CD4T	23053.6	0.372113	11.5816	5.10984e-31	1.7145e-28
ENSSSCG00000033114	ENSSSCG00000033114	5.30962	NK	318.867	0.677187	6.36399	1.96577e-10	9.25899e-09
ENSSSCG00000016491	KIAA1147	5.30921	CD21pB	80.6	0.821878	5.24312	1.57885e-07	2.28462e-06	KIAA1147 [Source:HGNC Symbol;Acc:HGNC:29472]
ENSSSCG00000040566	ENSSSCG00000040566	5.30856	Myeloid	1138.33	0.302995	14.2199	6.89438e-46	4.09231e-44
ENSSSCG00000013882	FAM129C	5.3084	CD21pB	359.6	0.335269	12.8506	8.53811e-38	1.46077e-35	family with sequence similarity 129 member C [Source:HGNC Symbol;Acc:HGNC:2413]
ENSSSCG00000008392	BCL11A	5.30754	CD21nB	918.467	0.398459	10.8105	3.06998e-27	3.16072e-25	B-cell lymphoma/leukemia 11A [Source:RefSeq peptide;Acc:NP_1284563]
ENSSSCG00000040001	TNFRSF25	5.30764	SWC6gdT	960.067	0.613922	7.01659	2.27348e-12	1.03724e-10	TNF receptor superfamily member 25 [Source:HGNC Symbol;Acc:HGNC:1191]
ENSSSCG00000016130	ZDBF2	5.30647	CD21nB	20.4	1.92961	2.23179	0.025629	0.0989932	zinc finger DBF-type containing 2 [Source:HGNC Symbol;Acc:HGNC:29313]
ENSSSCG00000040066	TRIM58	5.29822	CD21nB	46.5333	0.955259	4.49953	6.81032e-06	8.82308e-05	tripartite motif containing 58 [Source:HGNC Symbol;Acc:HGNC:2415]
ENSSSCG00000033203	ENSSSCG00000033203	5.28921	CD21nB	744.267	1.56188	2.74618	0.00602946	0.031755
ENSSSCG00000012307	CCNB3	5.29636	NK	249.533	0.659634	6.51325	7.35407e-11	3.80254e-09	cyclin B3 [Source:HGNC Symbol;Acc:HGNC:1879]
ENSSSCG00000039709	ENSSSCG00000039709	5.29593	CD4CD8T	249.8	0.975517	4.40375	1.06395e-05	0.00014244
ENSSSCG00000032343	ENSSSCG00000032343	5.29426	NK	226.867	0.716056	5.9971	2.00876e-09	7.81601e-08
ENSSSCG00000000625	LRP6	5.29368	Myeloid	136.733	0.494689	8.67956	3.973e-18	6.04208e-17	LDL receptor related protein 6 [Source:HGNC Symbol;Acc:HGNC:6698]
ENSSSCG00000033919	DCLK1	5.29234	SWC6gdT	61.4	1.09571	3.9174	8.95091e-05	0.00065125	doublecortin like kinase 1 [Source:HGNC Symbol;Acc:HGNC:27]
ENSSSCG00000014004	ENSSSCG00000014004	5.28994	CD4CD8T	65.4667	0.764622	5.61053	2.01705e-08	5.15075e-07	phospholipid phosphatase 2 [Source:RefSeq peptide;Acc:NP_1137195]
ENSSSCG00000033825	ENSSSCG00000033825	5.28974	SWC6gdT	280.467	1.04034	4.12341	3.73301e-05	0.000306708
ENSSSCG00000002267	RGMA	5.28473	CD21nB	14.8667	2.24061	1.91231	0.0558369	0.181353	repulsive guidance molecule BMP co-receptor a [Source:HGNC Symbol;Acc:HGNC:338]
ENSSSCG00000016832	IL7R	5.28845	CD4T	7583.47	0.269123	15.9349	3.62546e-57	8.27185e-54	interleukin-7 receptor subunit alpha precursor [Source:RefSeq peptide;Acc:NP_11396]
ENSSSCG00000027849	CNR2	5.28766	CD21pB	954.2	0.407305	10.5269	6.49433e-26	4.84327e-24	cannabinoid receptor 2 [Source:HGNC Symbol;Acc:HGNC:216]
ENSSSCG00000031502	ENSSSCG00000031502	5.28625	NK	271.467	0.63079	6.79505	1.08273e-11	6.17474e-10
ENSSSCG00000022536	SLC37A2	5.28339	CD21nB	687.067	0.508816	8.41834	3.81866e-17	2.08574e-15	solute carrier family 37 member 2 [Source:HGNC Symbol;Acc:HGNC:2644]
ENSSSCG00000032422	ENSSSCG00000032422	5.28376	SWC6gdT	124.067	0.742761	5.76734	8.05316e-09	1.7611e-07
ENSSSCG00000032330	THY1	5.28159	CD21nB	8217.2	0.338012	12.667	9.01131e-37	1.66409e-34	thy-1 membrane glycoprotein precursor [Source:RefSeq peptide;Acc:NP_113961]
ENSSSCG00000038909	ENSSSCG00000038909	5.28319	CD8T	522.8	1.28944	3.32175	0.000894543	0.00483979
ENSSSCG00000013266	LARGE2	5.28284	CD21pB	261.867	0.423873	10.1041	5.29999e-24	3.52344e-22	LARGE xylosyl- and glucuronyltransferase 2 [Source:HGNC Symbol;Acc:HGNC:16522]
ENSSSCG00000011609	FBLN2	5.27955	CD21nB	381.6	0.930475	4.59931	4.23884e-06	5.66836e-05	fibulin 2 [Source:HGNC Symbol;Acc:HGNC:361]
ENSSSCG00000028443	ENSSSCG00000028443	5.28045	SWC6gdT	105.267	0.592199	7.22806	4.8996e-13	2.56765e-11
ENSSSCG00000038398	CD226	5.28008	NK	2177.2	0.455272	9.40116	5.39639e-21	1.18456e-18	CD226 molecule [Source:HGNC Symbol;Acc:HGNC:16961]
ENSSSCG00000038909	ENSSSCG00000038909	5.27764	CD21nB	522.8	1.28944	3.31744	0.000908449	0.00649195
ENSSSCG00000015091	MPZL2	5.26827	CD21nB	9.66667	2.29464	1.8601	0.0628712	0.199521	myelin protein zero-like protein 2 precursor [Source:RefSeq peptide;Acc:NP_123175]
ENSSSCG00000003608	LCK	5.27748	CD8T	13669	0.260966	16.391	2.21938e-60	2.53187e-57	tyrosine-protein kinase Lck [Source:RefSeq peptide;Acc:NP_1137185]
ENSSSCG00000023790	ENSSSCG00000023790	5.27596	CD4CD8T	200.667	0.854264	5.00543	5.57372e-07	1.02602e-05
ENSSSCG00000010076	ZNF70	5.27552	CD21pB	557.467	0.273759	15.6178	5.50766e-55	2.66984e-52	zinc finger protein 7 [Source:HGNC Symbol;Acc:HGNC:1314]
ENSSSCG00000035110	TRAV4	5.27339	CD8T	71.2667	1.21478	3.51783	0.000435093	0.00262066	T cell receptor alpha variable 4 [Source:HGNC Symbol;Acc:HGNC:1214]
ENSSSCG00000032852	FAM167A	5.27163	CD21pB	53.5333	0.770034	5.54733	2.9007e-08	4.71982e-07	family with sequence similarity 167 member A [Source:HGNC Symbol;Acc:HGNC:15549]
ENSSSCG00000010504	BLNK	5.25838	CD21nB	2063.2	0.521836	8.16038	3.33975e-16	1.71166e-14	B cell linker [Source:HGNC Symbol;Acc:HGNC:14211]
ENSSSCG00000015014	ZC3H12C	5.26585	Myeloid	145.333	0.592772	7.19645	6.18018e-13	6.55426e-12	zinc finger CCCH-type containing 12C [Source:HGNC Symbol;Acc:HGNC:29362]
ENSSSCG00000037885	ENSSSCG00000037885	5.2643	CD8T	23053.6	0.372113	11.4597	2.10269e-30	3.99791e-28
ENSSSCG00000022630	FLYWCH2	5.26307	CD4T	45.1333	0.69704	6.11596	9.59765e-10	2.88892e-08	FLYWCH family member 2 [Source:RefSeq peptide;Acc:NP_123327]
ENSSSCG00000015098	CXCR5	5.26226	CD21pB	1138.8	0.272422	15.6458	3.55084e-55	1.79611e-52	C-X-C motif chemokine receptor 5 [Source:HGNC Symbol;Acc:HGNC:16]
ENSSSCG00000028711	CASP1	5.26001	CD21pB	2186.2	0.613718	6.94132	3.88452e-12	9.84585e-11	caspase-1 [Source:RefSeq peptide;Acc:NP_999327]
ENSSSCG00000012229	GP91-PHOX	5.2598	CD21pB	2430.13	0.422175	10.0901	6.10902e-24	4.0382e-22	cytochrome b-245 heavy chain precursor [Source:RefSeq peptide;Acc:NP_99928]
ENSSSCG00000008966	PARM1	5.25857	Myeloid	331	0.416038	10.236	1.36764e-24	3.00421e-23	prostate androgen-regulated mucin-like protein 1 precursor [Source:RefSeq peptide;Acc:NP_123645]
ENSSSCG00000036734	ENSSSCG00000036734	5.25853	CD4CD8T	107.267	0.550974	7.72908	1.08326e-14	9.26667e-13
ENSSSCG00000004646	ATP8B4	5.25842	Myeloid	300.8	0.593502	7.17507	7.22704e-13	7.61588e-12	ATPase phospholipid transporting 8B4 (putative) [Source:HGNC Symbol;Acc:HGNC:13536]
ENSSSCG00000002893	CD22	5.2528	CD21nB	3000.33	0.387289	10.981	4.7187e-28	5.17899e-26	CD22 molecule [Source:HGNC Symbol;Acc:HGNC:1643]
ENSSSCG00000000528	PKP2	5.25834	CD21pB	150.867	0.579322	7.35055	1.97397e-13	5.77015e-12	plakophilin 2 [Source:HGNC Symbol;Acc:HGNC:924]
ENSSSCG00000004535	TCF4	5.25688	CD21pB	977.2	0.307994	13.8213	1.89566e-43	4.69237e-41	transcription factor 4 [Source:HGNC Symbol;Acc:HGNC:11634]
ENSSSCG00000013551	C3	5.25644	Myeloid	298.8	0.444566	9.57438	1.02468e-21	1.92586e-20	complement C3 precursor [Source:RefSeq peptide;Acc:NP_999174]
ENSSSCG00000009748	RIMBP2	5.25626	CD4CD8T	86.2667	0.620711	6.85706	7.02902e-12	3.76846e-10	RIMS binding protein 2 [Source:HGNC Symbol;Acc:HGNC:3339]
ENSSSCG00000036672	ENSSSCG00000036672	5.25393	CD4T	72.3333	0.789783	5.38621	7.19594e-08	1.5146e-06
ENSSSCG00000015923	NOSTRIN	5.2537	CD4T	64.3333	0.623368	6.82374	8.87029e-12	3.78997e-10	nitric oxide synthase trafficking [Source:HGNC Symbol;Acc:HGNC:223]
ENSSSCG00000034652	TRAV5	5.25319	CD4CD8T	96.4	0.629738	6.75391	1.43914e-11	7.1551e-10	T cell receptor alpha variable 5 [Source:HGNC Symbol;Acc:HGNC:12143]
ENSSSCG00000031248	ENSSSCG00000031248	5.25281	NK	294.8	1.97085	2.15785	0.0309394	0.142187
ENSSSCG00000007436	MMP9	5.24712	CD21nB	27	1.01061	4.20253	2.6395e-05	0.000294138	matrix metalloproteinase-9 precursor [Source:RefSeq peptide;Acc:NP_13393]
ENSSSCG00000033539	CRYBG2	5.25159	NK	95.3333	0.62992	6.74941	1.48444e-11	8.26313e-10	crystallin beta-gamma domain containing 2 [Source:HGNC Symbol;Acc:HGNC:17295]
ENSSSCG00000004587	MYO1E	5.25118	Myeloid	749.733	0.530917	8.00724	1.17309e-15	1.51641e-14	myosin IE [Source:HGNC Symbol;Acc:HGNC:7599]
ENSSSCG00000036249	ENSSSCG00000036249	5.25101	CD4CD8T	122.6	1.1627	3.65614	0.000256039	0.00232353
ENSSSCG00000015447	ENSSSCG00000015447	5.24813	CD8T	267.6	0.426839	9.95253	2.45847e-23	2.39711e-21
ENSSSCG00000004284	ENSSSCG00000004284	5.22488	CD21nB	59.8	4.24116	0.996161	0.319172	0.671066
ENSSSCG00000036314	HHEX	5.24348	CD21pB	1213.33	0.33611	12.6253	1.53206e-36	2.31481e-34	hematopoietically-expressed homeobox protein HHEX [Source:RefSeq peptide;Acc:NP_123158]
ENSSSCG00000023662	CHST3	5.24289	CD4T	145.4	0.62308	6.80954	9.79081e-12	4.16767e-10	carbohydrate sulfotransferase 3 [Source:HGNC Symbol;Acc:HGNC:1971]
ENSSSCG00000037420	TMEM17B	5.24148	Myeloid	94.5333	0.4584	9.2528	2.18693e-20	3.82022e-19	transmembrane protein 17B [Source:HGNC Symbol;Acc:HGNC:34244]
ENSSSCG00000026547	SLC45A3	5.23912	SWC6gdT	248.8	0.618094	6.85838	6.96441e-12	2.8036e-10	solute carrier family 45 member 3 [Source:HGNC Symbol;Acc:HGNC:8642]
ENSSSCG00000003226	ENSSSCG00000003226	5.23664	Myeloid	854.067	0.193464	21.8989	2.66412e-106	1.93715e-103
ENSSSCG00000009953	ENSSSCG00000009953	5.2362	SWC6gdT	26.7333	1.75306	2.41646	0.0156723	0.0478435
ENSSSCG00000016092	SGO2	5.23485	NK	292.533	0.830138	5.10138	3.37179e-07	8.31089e-06	shugoshin 2 [Source:HGNC Symbol;Acc:HGNC:3812]
ENSSSCG00000039797	APCDD1	5.23166	Myeloid	35.0667	0.837292	5.05398	4.32696e-07	2.62323e-06	APC down-regulated 1 [Source:HGNC Symbol;Acc:HGNC:15718]
ENSSSCG00000011752	FNDC3B	5.22893	Myeloid	201.6	0.54908	7.70185	1.34114e-14	1.61687e-13	fibronectin type III domain containing 3B [Source:HGNC Symbol;Acc:HGNC:2467]
ENSSSCG00000031145	ENSSSCG00000031145	5.22794	CD4CD8T	49.3333	0.763236	5.5395	3.03341e-08	7.39846e-07
ENSSSCG00000024810	PRAM1	5.22734	Myeloid	1314	0.285208	14.8219	1.05705e-49	7.59115e-48	PML-RARA regulated adaptor molecule 1 [Source:HGNC Symbol;Acc:HGNC:391]
ENSSSCG00000016313	HJURP	5.22718	NK	144.533	0.862257	4.90246	9.46448e-07	2.14221e-05	Holliday junction recognition protein [Source:HGNC Symbol;Acc:HGNC:25444]
ENSSSCG00000039704	ENSSSCG00000039704	5.2271	SWC6gdT	31.2	0.894587	4.7252	2.29887e-06	2.6612e-05
ENSSSCG00000034506	MS4A2	5.22267	CD21nB	7160.8	0.543218	7.77344	7.63847e-15	3.41792e-13	high affinity immunoglobulin epsilon receptor subunit beta [Source:RefSeq peptide;Acc:NP_999257]
ENSSSCG00000005164	HACD4	5.22438	Myeloid	919.4	0.324665	13.0115	1.05261e-38	4.80239e-37	3-hydroxyacyl-CoA dehydratase 4 [Source:HGNC Symbol;Acc:HGNC:292]
ENSSSCG00000029295	BPIFB4	5.20914	CD21nB	138.4	1.24646	3.37687	0.000733153	0.00537799	BPI fold containing family B member 4 [Source:HGNC Symbol;Acc:HGNC:16179]
ENSSSCG00000011750	PLD1	5.22238	CD21pB	197.867	0.547758	7.70847	1.27337e-14	4.16133e-13	phospholipase D1 [Source:RefSeq peptide;Acc:NP_1231518]
ENSSSCG00000001456	ENSSSCG00000001456	5.22232	CD21pB	42284.1	0.303915	13.8931	6.97747e-44	1.84491e-41	SLA class II histocompatibility antigen, DQ haplotype D alpha chain precursor [Source:RefSeq peptide;Acc:NP_117534]
ENSSSCG00000001499	DST	5.2217	Myeloid	88.4	0.821726	5.1376	2.78266e-07	1.72659e-06	dystonin [Source:HGNC Symbol;Acc:HGNC:19]
ENSSSCG00000002383	FOS	5.21486	Myeloid	15344	1.55688	2.70724	0.00678445	0.0211156	proto-oncogene c-Fos [Source:RefSeq peptide;Acc:NP_1116585]
ENSSSCG00000030300	ENSSSCG00000030300	5.211	Myeloid	308.4	0.468205	8.99393	2.38555e-19	3.91998e-18	Metallothionein-2A [Source:UniProtKB/Swiss-Prot;Acc:P79379]
ENSSSCG00000023630	CPM	5.21092	Myeloid	747.4	0.384336	10.9564	6.19473e-28	1.64167e-26	carboxypeptidase M [Source:HGNC Symbol;Acc:HGNC:2311]
ENSSSCG00000038598	ADRB2	5.20961	NK	157.267	0.876385	4.80338	1.5601e-06	3.40528e-05	beta-2 adrenergic receptor [Source:RefSeq peptide;Acc:NP_112198]
ENSSSCG00000032607	ALPL	5.19901	CD21nB	35.3333	1.64394	2.55424	0.0106421	0.0501864	alkaline phosphatase, liver/bone/kidney [Source:HGNC Symbol;Acc:HGNC:438]
ENSSSCG00000034118	ENSSSCG00000034118	5.209	CD4CD8T	211	0.548841	7.66888	1.73499e-14	1.42147e-12
ENSSSCG00000006298	XCL1	5.20535	CD8T	420.4	0.642376	6.54655	5.88809e-11	1.68772e-09	lymphotactin precursor [Source:RefSeq peptide;Acc:NP_1127817]
ENSSSCG00000024872	CPT1C	5.20518	Myeloid	87.9333	0.709661	5.92562	3.11129e-09	2.3845e-08	carnitine palmitoyltransferase 1C [Source:HGNC Symbol;Acc:HGNC:1854]
ENSSSCG00000004139	ADGRG6	5.19951	CD21pB	67	0.704605	5.96009	2.52095e-09	4.61871e-08	adhesion G protein-coupled receptor G6 [Source:HGNC Symbol;Acc:HGNC:13841]
ENSSSCG00000000734	ENSSSCG00000000734	5.1982	CD21nB	65.1333	0.955967	4.39157	1.12536e-05	0.000138838
ENSSSCG00000008349	CNRIP1	5.17481	CD21nB	51.7333	0.931658	4.48106	7.42742e-06	9.51659e-05	cannabinoid receptor interacting protein 1 [Source:HGNC Symbol;Acc:HGNC:24546]
ENSSSCG00000023790	ENSSSCG00000023790	5.19734	CD4T	200.667	0.854333	4.913	8.96939e-07	1.48294e-05
ENSSSCG00000020837	ENSSSCG00000020837	5.19647	CD21pB	502.067	0.397796	10.5493	5.11803e-26	3.89171e-24
ENSSSCG00000003344	VWA1	5.19077	CD4T	36.6667	0.818171	5.12212	3.0212e-07	5.52337e-06	von Willebrand factor A domain containing 1 [Source:HGNC Symbol;Acc:HGNC:391]
ENSSSCG00000026097	LAMP3	5.18969	CD21pB	1069.47	0.283296	14.7891	1.7228e-49	6.46551e-47	lysosomal associated membrane protein 3 [Source:HGNC Symbol;Acc:HGNC:14582]
ENSSSCG00000025858	ELN	5.18816	SWC6gdT	45.8	1.01019	4.14591	3.38461e-05	0.00028086	elastin precursor [Source:RefSeq peptide;Acc:NP_132653]
ENSSSCG00000036499	LMO3	5.18791	CD21pB	77.8667	0.75713	5.5313	3.17875e-08	5.12921e-07	LIM domain only protein 3 [Source:RefSeq peptide;Acc:NP_116155]
ENSSSCG00000023788	TBC1D3	5.1873	Myeloid	35	1.03863	4.03157	5.54051e-05	0.000251594	TBC1 domain family member 3 [Source:HGNC Symbol;Acc:HGNC:29164]
ENSSSCG00000036723	EMP1	5.18713	NK	2340.13	0.651437	6.42752	1.29705e-10	6.30948e-09	epithelial membrane protein 1 [Source:RefSeq peptide;Acc:NP_19341]
ENSSSCG00000003949	CDC2	5.18704	NK	801.133	0.759946	5.50965	3.59538e-08	1.06979e-06	Cell division cycle protein 2 homolog [Source:UniProtKB/Swiss-Prot;Acc:Q5H7C]
ENSSSCG00000036513	ENSSSCG00000036513	5.18606	CD8T	158.067	0.651284	6.4274	1.29806e-10	3.53418e-09
ENSSSCG00000009488	SLITRK5	5.18521	NK	70.5333	2.07433	2.01762	0.0436309	0.182656	SLIT and NTRK like family member 5 [Source:HGNC Symbol;Acc:HGNC:2295]
ENSSSCG00000036292	ENSSSCG00000036292	5.18385	CD8T	82.5333	1.12034	3.73446	0.000188119	0.00129203
ENSSSCG00000016832	IL7R	5.17832	CD4CD8T	7583.47	0.26913	15.5253	2.33938e-54	5.44326e-51	interleukin-7 receptor subunit alpha precursor [Source:RefSeq peptide;Acc:NP_11396]
ENSSSCG00000008576	ENSSSCG00000008576	5.17788	SWC6gdT	1644.47	0.482386	8.66088	4.68155e-18	5.18716e-16
ENSSSCG00000016033	GULP1	5.17709	CD4CD8T	21.6	1.94011	2.15302	0.0313172	0.116181	GULP, engulfment adaptor PTB domain containing 1 [Source:HGNC Symbol;Acc:HGNC:18649]
ENSSSCG00000037885	ENSSSCG00000037885	5.17688	CD4CD8T	23053.6	0.372115	11.2247	3.08419e-29	9.96708e-27
ENSSSCG00000004018	AFDN	5.17636	CD4CD8T	76	0.696861	5.99311	2.05872e-09	6.69025e-08	afadin, adherens junction formation factor [Source:HGNC Symbol;Acc:HGNC:7137]
ENSSSCG00000023666	CTSB	5.17567	Myeloid	14416.7	0.317246	13.1622	1.44714e-39	6.7887e-38	Cathepsin B Cathepsin B light chain Cathepsin B heavy chain [Source:UniProtKB/Swiss-Prot;Acc:A1E295]
ENSSSCG00000001458	ENSSSCG00000001458	5.16166	CD21nB	231.8	0.526927	7.89799	2.83444e-15	1.32967e-13
ENSSSCG00000006450	CD1E	5.17399	NK	82.2	1.12687	3.70405	0.000212187	0.00245142	T-cell surface glycoprotein CD1e, membrane-associated precursor [Source:RefSeq peptide;Acc:NP_19961]
ENSSSCG00000033955	ENSSSCG00000033955	5.16627	NK	41.3333	5.43255	0.766909	0.443136	0.892871
ENSSSCG00000023557	CCRL2	5.16549	Myeloid	315.533	0.571502	7.28868	3.13013e-13	3.39384e-12	Chemokine C-C motif receptor-like 2 [Source:UniProtKB/Swiss-Prot;Acc:Q75ZH]
ENSSSCG00000038618	RFLNB	5.16451	CD4T	902.267	0.691544	6.02205	1.72224e-09	4.91182e-08	refilin B [Source:HGNC Symbol;Acc:HGNC:2875]
ENSSSCG00000023045	BAHCC1	5.15867	CD21nB	65.0667	1.21249	3.42985	0.000603904	0.00458605	BAH domain and coiled-coil containing 1 [Source:HGNC Symbol;Acc:HGNC:29279]
ENSSSCG00000003433	PLOD1	5.15999	Myeloid	242.867	0.367973	11.3051	1.23746e-29	3.67262e-28	procollagen-lysine,2-oxoglutarate 5-dioxygenase 1 [Source:HGNC Symbol;Acc:HGNC:981]
ENSSSCG00000002648	CBFA2T3	5.14362	CD21nB	325.133	0.370854	11.1732	5.51579e-29	6.48189e-27	CBFA2/RUNX1 translocation partner 3 [Source:HGNC Symbol;Acc:HGNC:1537]
ENSSSCG00000039373	SNX24	5.15789	SWC6gdT	290.2	0.871909	4.76872	1.85399e-06	2.21223e-05	sorting nexin 24 [Source:HGNC Symbol;Acc:HGNC:21533]
ENSSSCG00000015879	DAPL1	5.1566	CD4T	2374	0.623437	6.66724	2.60662e-11	1.02187e-09	death-associated protein-like 1 [Source:RefSeq peptide;Acc:NP_117213]
ENSSSCG00000009226	KLHL8	5.15579	NK	822.533	0.573363	7.24809	4.22681e-13	2.98028e-11	kelch like family member 8 [Source:HGNC Symbol;Acc:HGNC:18644]
ENSSSCG00000007904	TEKT5	5.15518	SWC6gdT	141.533	0.737525	5.63395	1.76132e-08	3.57612e-07	tektin 5 [Source:HGNC Symbol;Acc:HGNC:26554]
ENSSSCG00000023396	LIX1	5.15497	CD4T	517.667	0.80343	5.17154	2.32178e-07	4.40713e-06	limb and CNS expressed 1 [Source:HGNC Symbol;Acc:HGNC:18581]
ENSSSCG00000016473	EPHB6	5.15477	CD4T	2240.27	0.326737	12.716	4.82203e-37	2.61951e-34	EPH receptor B6 [Source:HGNC Symbol;Acc:HGNC:3396]
ENSSSCG00000031145	ENSSSCG00000031145	5.1534	CD8T	49.3333	0.763524	5.43978	5.33461e-08	9.34826e-07
ENSSSCG00000023503	PRKCD	5.1517	Myeloid	3198	0.159641	26.0065	4.17607e-149	8.0974e-146	protein kinase C delta [Source:HGNC Symbol;Acc:HGNC:9399]
ENSSSCG00000016916	IL6ST	5.15136	CD4T	3299.47	0.366	11.3425	8.07834e-30	2.30394e-27	interleukin-6 receptor subunit beta precursor [Source:RefSeq peptide;Acc:NP_1991]
ENSSSCG00000036511	RF1848	5.14874	CD21pB	70.9333	3.38269	1.22646	0.220026	0.466943
ENSSSCG00000010128	ENSSSCG00000010128	5.14788	Myeloid	85.5333	0.772638	5.36846	7.94118e-08	5.26426e-07
ENSSSCG00000037104	RF1877	5.1464	CD4T	468.933	0.473347	8.75974	1.95698e-18	1.90814e-16
ENSSSCG00000006831	SORT1	5.14579	NK	959.733	0.532607	7.78396	7.02916e-15	6.59494e-13	sortilin 1 [Source:HGNC Symbol;Acc:HGNC:11186]
ENSSSCG00000017894	WSCD1	5.14544	CD8T	286.733	0.441126	9.3974	5.5928e-21	4.31099e-19	WSC domain containing 1 [Source:HGNC Symbol;Acc:HGNC:296]
ENSSSCG00000039561	ENSSSCG00000039561	5.14347	CD21nB	68.2	0.675525	6.1337	8.58561e-10	2.20497e-08
ENSSSCG00000005650	CERCAM	5.14263	CD21nB	33.7333	1.1407	3.63166	0.0002816	0.00235523	cerebral endothelial cell adhesion molecule [Source:HGNC Symbol;Acc:HGNC:23723]
ENSSSCG00000032741	TBC1D9	5.14101	CD21nB	1477.07	0.367185	11.2777	1.69055e-29	2.09232e-27	TBC1 domain family member 9 [Source:HGNC Symbol;Acc:HGNC:2171]
ENSSSCG00000038003	ITK	5.14179	CD4CD8T	8676.4	0.401903	10.3055	6.65761e-25	1.61364e-22	IL2 inducible T cell kinase [Source:HGNC Symbol;Acc:HGNC:6171]
ENSSSCG00000008169	TBC1D8	5.14105	Myeloid	401.2	0.645766	6.41262	1.43038e-10	1.24465e-09	TBC1 domain family member 8 [Source:HGNC Symbol;Acc:HGNC:17791]
ENSSSCG00000016570	TSPAN33	5.12723	CD21nB	255.867	0.369451	11.1713	5.63724e-29	6.55837e-27	tetraspanin 33 [Source:HGNC Symbol;Acc:HGNC:28743]
ENSSSCG00000035458	RF1875	5.14099	SWC6gdT	104.267	0.619023	6.68956	2.23849e-11	8.23261e-10
ENSSSCG00000034293	ARL4C	5.13792	CD8T	6105	0.364429	11.3545	7.04212e-30	1.27518e-27	ADP-ribosylation factor-like protein 4C [Source:RefSeq peptide;Acc:NP_1231244]
ENSSSCG00000027941	LSAMP	5.13671	CD4CD8T	157.733	0.730999	5.65898	1.52276e-08	3.99005e-07	limbic system-associated membrane protein precursor [Source:RefSeq peptide;Acc:NP_1231626]
ENSSSCG00000028804	CCDC181	5.13434	NK	64.1333	0.936345	4.41541	1.0082e-05	0.000174805	coiled-coil domain-containing protein 181 [Source:RefSeq peptide;Acc:NP_1231725]
ENSSSCG00000004193	ENPP1	5.1319	NK	314.867	0.732057	5.64423	1.65921e-08	5.40709e-07	ectonucleotide pyrophosphatase/phosphodiesterase 1 [Source:HGNC Symbol;Acc:HGNC:3356]
ENSSSCG00000007602	BAIAP2L1	5.12848	NK	321.267	0.561098	7.35785	1.86896e-13	1.37715e-11	BAI1 associated protein 2 like 1 [Source:HGNC Symbol;Acc:HGNC:21649]
ENSSSCG00000012376	GDPD2	5.12749	SWC6gdT	82.4667	0.908014	4.54562	5.47736e-06	5.79798e-05	glycerophosphodiester phosphodiesterase domain containing 2 [Source:HGNC Symbol;Acc:HGNC:25974]
ENSSSCG00000004779	PLCB2	5.12732	Myeloid	3478.2	0.426639	9.67404	3.88719e-22	7.50046e-21	phospholipase C beta 2 [Source:HGNC Symbol;Acc:HGNC:955]
ENSSSCG00000023693	PROC	5.11675	CD21nB	82.4667	0.722101	5.70106	1.19062e-08	2.58426e-07	vitamin K-dependent protein C precursor [Source:RefSeq peptide;Acc:NP_99983]
ENSSSCG00000014878	PAK1	5.12612	Myeloid	1144.53	0.182945	22.5538	1.23114e-112	1.19359e-109	p21 (RAC1) activated kinase 1 [Source:HGNC Symbol;Acc:HGNC:859]
ENSSSCG00000003470	FAM131C	5.12263	CD21pB	22.9333	0.983722	4.19085	2.77913e-05	0.000263938	family with sequence similarity 131 member C [Source:HGNC Symbol;Acc:HGNC:26717]
ENSSSCG00000027101	TVP23A	5.12092	Myeloid	44	0.834118	4.94045	7.79428e-07	4.5659e-06	trans-golgi network vesicle protein 23 homolog A [Source:HGNC Symbol;Acc:HGNC:2398]
ENSSSCG00000036865	ENSSSCG00000036865	5.12087	Myeloid	44.4	1.013	4.06798	4.74225e-05	0.000218155
ENSSSCG00000009148	LEF1	5.12038	CD8T	11414.1	0.207024	19.9029	3.84157e-88	4.38246e-84	lymphoid enhancer-binding factor 1 [Source:RefSeq peptide;Acc:NP_1123439]
ENSSSCG00000027232	ENSSSCG00000027232	5.11728	CD4T	1001.73	0.585337	7.03403	2.00655e-12	9.38143e-11
ENSSSCG00000007754	ITGAM	5.11334	CD21nB	11616.7	0.459215	8.95731	3.32696e-19	2.15032e-17	integrin subunit alpha X [Source:HGNC Symbol;Acc:HGNC:6152]
ENSSSCG00000002090	ENSSSCG00000002090	5.11604	CD4T	159.6	0.851056	4.83639	1.32219e-06	2.09493e-05
ENSSSCG00000001052	PHACTR1	5.11385	CD21pB	1059.4	0.366904	11.2123	3.54763e-29	3.19947e-27	phosphatase and actin regulator 1 [Source:HGNC Symbol;Acc:HGNC:299]
ENSSSCG00000000705	CD27	5.11375	CD4T	6568.33	1.1478	3.58402	0.000338341	0.00274523	CD27 antigen precursor [Source:RefSeq peptide;Acc:NP_1265692]
ENSSSCG00000015120	USP2	5.10835	CD21nB	65.0667	0.786895	5.22097	1.77992e-07	3.24933e-06	ubiquitin specific peptidase 2 [Source:HGNC Symbol;Acc:HGNC:12618]
ENSSSCG00000009233	GPAT3	5.11287	Myeloid	127.8	0.355279	11.5764	5.4247e-31	1.72907e-29	glycerol-3-phosphate acyltransferase 3 [Source:HGNC Symbol;Acc:HGNC:28157]
ENSSSCG00000010505	DNTT	5.11282	Myeloid	393.133	1.33775	3.07444	0.00210898	0.00731106	DNA nucleotidylexotransferase [Source:HGNC Symbol;Acc:HGNC:2983]
ENSSSCG00000006458	FCRL4	5.11245	CD21pB	612.867	0.294413	13.9683	2.43285e-44	6.73901e-42	Fc receptor like 4 [Source:HGNC Symbol;Acc:HGNC:1857]
ENSSSCG00000017789	ABHD15	5.11108	NK	277	0.741482	5.5444	2.9496e-08	9.00674e-07	abhydrolase domain containing 15 [Source:HGNC Symbol;Acc:HGNC:26971]
ENSSSCG00000016957	CD18	5.10889	CD21pB	852.533	0.376541	10.9122	1.00801e-27	8.62293e-26	CD18 antigen precursor [Source:RefSeq peptide;Acc:NP_999522]
ENSSSCG00000015019	COLCA2	5.10684	CD21nB	12.5333	3.62345	1.13341	0.257044	0.573102	colorectal cancer associated 2 [Source:HGNC Symbol;Acc:HGNC:26978]
ENSSSCG00000004744	TYRO3	5.10781	Myeloid	36.9333	0.817498	5.02486	5.03804e-07	3.02282e-06	TYRO3 protein tyrosine kinase [Source:HGNC Symbol;Acc:HGNC:12446]
ENSSSCG00000015930	DHRS9	5.10764	CD21pB	1062.8	0.278186	14.7658	2.43379e-49	8.84834e-47	dehydrogenase/reductase 9 [Source:HGNC Symbol;Acc:HGNC:16888]
ENSSSCG00000035987	EHD3	5.09865	CD21nB	978.867	0.348661	11.7554	6.62468e-32	1.00093e-29	EH domain containing 3 [Source:HGNC Symbol;Acc:HGNC:3244]
ENSSSCG00000015559	NCF2	5.10586	Myeloid	2414.8	0.19607	20.9408	2.27486e-97	1.05863e-94	neutrophil cytosol factor 2 [Source:RefSeq peptide;Acc:NP_1116614]
ENSSSCG00000004191	MOXD1	5.10373	NK	84.8	0.907772	4.52066	6.16462e-06	0.00011384	monooxygenase DBH like 1 [Source:HGNC Symbol;Acc:HGNC:2163]
ENSSSCG00000032112	ENSSSCG00000032112	5.10281	CD4CD8T	271.867	0.439901	9.32665	1.09265e-20	2.15456e-18
ENSSSCG00000029249	NAV3	5.10026	CD4T	712.467	0.482387	8.49994	1.89682e-17	1.63931e-15	neuron navigator 3 [Source:HGNC Symbol;Acc:HGNC:15998]
ENSSSCG00000007973	IL9R	5.09803	CD21nB	536.8	0.847249	4.83686	1.31905e-06	2.0272e-05	interleukin 9 receptor [Source:HGNC Symbol;Acc:HGNC:63]
ENSSSCG00000015406	GNAT3	5.09444	CD21nB	53.6	4.2405	0.965558	0.334265	0.69465	G protein subunit alpha transducin 3 [Source:HGNC Symbol;Acc:HGNC:228]
ENSSSCG00000008703	ADRA2C	5.09431	CD21nB	74.6	1.10085	3.71922	0.00019984	0.00174283	adrenoceptor alpha 2C [Source:HGNC Symbol;Acc:HGNC:283]
ENSSSCG00000006350	ENSSSCG00000006350	5.08776	CD21nB	1483.67	0.294989	13.8574	1.14822e-43	3.3396e-41	low affinity immunoglobulin gamma Fc region receptor II-b precursor [Source:RefSeq peptide;Acc:NP_128185]
ENSSSCG00000006143	CA13	5.09241	Myeloid	104.867	0.535497	7.64226	2.13442e-14	2.53386e-13	carbonic anhydrase 13 [Source:HGNC Symbol;Acc:HGNC:14914]
ENSSSCG00000012144	GRPR	5.09105	CD4T	55.1333	0.711982	5.746	9.13785e-09	2.27942e-07	gastrin-releasing peptide receptor [Source:RefSeq peptide;Acc:NP_132569]
ENSSSCG00000004466	TTK	5.09068	NK	295.667	0.693948	5.8948	3.75139e-09	1.39883e-07	TTK protein kinase [Source:HGNC Symbol;Acc:HGNC:1241]
ENSSSCG00000017515	TBKBP1	5.09061	NK	111.667	0.755142	5.41701	6.06047e-08	1.72812e-06	TBK1 binding protein 1 [Source:HGNC Symbol;Acc:HGNC:314]
ENSSSCG00000031831	CADM1	5.09057	NK	293.133	0.738782	5.53692	3.07846e-08	9.35111e-07	cell adhesion molecule 1 [Source:HGNC Symbol;Acc:HGNC:5951]
ENSSSCG00000036672	ENSSSCG00000036672	5.08965	CD4CD8T	72.3333	0.790253	5.17512	2.2777e-07	4.56089e-06
ENSSSCG00000009645	ADAMDEC1	5.08841	Myeloid	20.6	1.41514	2.88906	0.00386399	0.0127024	ADAM like decysin 1 [Source:HGNC Symbol;Acc:HGNC:16299]
ENSSSCG00000034293	ARL4C	5.08815	CD4T	6105	0.364432	11.2179	3.33118e-29	9.04812e-27	ADP-ribosylation factor-like protein 4C [Source:RefSeq peptide;Acc:NP_1231244]
ENSSSCG00000006390	CASQ1	5.08805	CD21pB	57.6667	0.759979	5.37916	7.48329e-08	1.14253e-06	calsequestrin-1 precursor [Source:RefSeq peptide;Acc:NP_123198]
ENSSSCG00000011103	PARD3	5.08801	NK	37.4	1.45611	2.80748	0.00499308	0.0338517	par-3 family cell polarity regulator [Source:HGNC Symbol;Acc:HGNC:1651]
ENSSSCG00000000648	CLEC7A	5.07326	CD21nB	138.6	0.762208	5.34403	9.09037e-08	1.75385e-06	C-type lectin domain family 7 member A [Source:RefSeq peptide;Acc:NP_1139338]
ENSSSCG00000040251	ENSSSCG00000040251	5.08773	NK	17.2	1.76319	2.31838	0.0204288	0.103967
ENSSSCG00000015808	ADAM9	5.08634	Myeloid	584.867	0.351044	11.6405	2.56394e-31	8.30889e-30	ADAM metallopeptidase domain 9 [Source:HGNC Symbol;Acc:HGNC:216]
ENSSSCG00000040140	CD3E	5.08612	CD4T	25628.6	0.942576	4.33505	1.45724e-05	0.00017818	T-cell surface glycoprotein CD3 epsilon chain precursor [Source:RefSeq peptide;Acc:NP_999392]
ENSSSCG00000016735	ENSSSCG00000016735	5.08332	CD4CD8T	48.8	1.31157	3.11332	0.00184998	0.0124914
ENSSSCG00000027770	TDRKH	5.0818	NK	92.6	1.20546	3.38609	0.000708959	0.0068335	tudor and KH domain-containing protein [Source:RefSeq peptide;Acc:NP_123123]
ENSSSCG00000029304	STEAP3	5.08016	CD21pB	618.867	0.460309	8.86397	7.72163e-19	3.72753e-17	STEAP3 metalloreductase [Source:HGNC Symbol;Acc:HGNC:24592]
ENSSSCG00000017466	CCR7	5.0796	CD8T	8903.13	0.529029	7.71148	1.24369e-14	5.23542e-13	C-C motif chemokine receptor 7 [Source:HGNC Symbol;Acc:HGNC:168]
ENSSSCG00000015447	ENSSSCG00000015447	5.07464	NK	267.6	0.560043	7.2756	3.44897e-13	2.47687e-11
ENSSSCG00000008614	SMC6	5.07437	CD21pB	11360.7	0.511044	7.97264	1.55325e-15	5.61196e-14	structural maintenance of chromosomes 6 [Source:HGNC Symbol;Acc:HGNC:2466]
ENSSSCG00000032112	ENSSSCG00000032112	5.0743	CD8T	271.867	0.439939	9.26107	2.02396e-20	1.43412e-18
ENSSSCG00000009229	ARHGAP24	5.06999	CD21nB	532.6	0.433121	9.39689	5.61997e-21	4.13815e-19	Rho GTPase activating protein 24 [Source:HGNC Symbol;Acc:HGNC:25361]
ENSSSCG00000010471	KIF11	5.07259	NK	1134.87	0.650115	6.26442	3.74219e-10	1.69403e-08	kinesin family member 11 [Source:HGNC Symbol;Acc:HGNC:6388]
ENSSSCG00000004823	LRRK1	5.07121	CD21pB	907.933	0.510888	7.96888	1.60113e-15	5.76704e-14	leucine rich repeat kinase 1 [Source:HGNC Symbol;Acc:HGNC:1868]
ENSSSCG00000024494	ST6GALNAC3	5.06164	CD21nB	103.6	0.784512	5.17729	2.25137e-07	4.04204e-06	ST6 N-acetylgalactosaminide alpha-2,6-sialyltransferase 3 [Source:HGNC Symbol;Acc:HGNC:19343]
ENSSSCG00000034118	ENSSSCG00000034118	5.06942	CD4T	211	0.549023	7.4121	1.24312e-13	7.16237e-12
ENSSSCG00000040162	NUPR1	5.0676	CD21pB	93.1333	0.773057	5.26171	1.42724e-07	2.07297e-06	nuclear protein 1, transcriptional regulator [Source:HGNC Symbol;Acc:HGNC:2999]
ENSSSCG00000030560	ENSSSCG00000030560	5.06645	Myeloid	125.667	0.510485	7.96586	1.64076e-15	2.10924e-14	insulin-like growth factor 1 receptor precursor [Source:RefSeq peptide;Acc:NP_999337]
ENSSSCG00000016479	TRBV19	5.06591	CD8T	345.467	0.419441	9.69363	3.20913e-22	2.77346e-20	T cell receptor beta variable 19 [Source:HGNC Symbol;Acc:HGNC:12194]
ENSSSCG00000000240	KRT85	5.06454	CD4T	134.133	0.91107	4.46128	8.14698e-06	0.00010757	keratin 85 [Source:HGNC Symbol;Acc:HGNC:6462]
ENSSSCG00000040155	ENSSSCG00000040155	5.06392	CD8T	96.4	0.740649	5.48697	4.08878e-08	7.35722e-07
ENSSSCG00000008475	MAP4K3	5.06314	Myeloid	87.1333	1.09424	3.71321	0.000204643	0.000853953	mitogen-activated protein kinase kinase kinase kinase 3 [Source:HGNC Symbol;Acc:HGNC:6865]
ENSSSCG00000031348	ENSSSCG00000031348	5.06313	Myeloid	472.267	0.683215	5.94707	2.7298e-09	2.1088e-08
ENSSSCG00000034356	ENSSSCG00000034356	5.06124	CD21nB	23.8667	1.55831	2.60618	0.00915577	0.0444752
ENSSSCG00000010076	ZNF70	5.06044	CD21nB	557.467	0.27389	14.8251	1.00872e-49	4.51364e-47	zinc finger protein 7 [Source:HGNC Symbol;Acc:HGNC:1314]
ENSSSCG00000022467	VPREB1	5.05609	CD21nB	341.333	1.45609	2.78562	0.00534263	0.0287997	immunoglobulin iota chain precursor [Source:RefSeq peptide;Acc:NP_168585]
ENSSSCG00000038317	ENSSSCG00000038317	5.05861	CD8T	61.1333	1.08667	3.7349	0.000187792	0.00129056
ENSSSCG00000016477	TRBV24-1	5.05794	CD8T	83.9333	0.670217	6.05467	1.40706e-09	3.26919e-08	T cell receptor beta variable 24-1 [Source:HGNC Symbol;Acc:HGNC:1223]
ENSSSCG00000023228	NUMBL	5.05636	NK	280.067	0.371964	10.9052	1.08799e-27	4.86836e-25	NUMB like, endocytic adaptor protein [Source:HGNC Symbol;Acc:HGNC:861]
ENSSSCG00000026293	STX5	5.05529	CD21nB	57.6667	1.37376	2.95197	0.00315752	0.0187326	syntaxin-5 [Source:RefSeq peptide;Acc:NP_12331]
ENSSSCG00000002389	VASH1	5.04316	CD21nB	640.333	0.49758	8.12564	4.45019e-16	2.26085e-14	vasohibin 1 [Source:HGNC Symbol;Acc:HGNC:19964]
ENSSSCG00000033854	LGALS1	5.05452	Myeloid	5384.8	0.520545	7.789	6.75415e-15	8.32391e-14	galectin-1 [Source:RefSeq peptide;Acc:NP_11867]
ENSSSCG00000016090	SPATS2L	5.05419	Myeloid	293.4	0.369597	10.9692	5.37213e-28	1.43677e-26	SPATS2-like protein [Source:RefSeq peptide;Acc:NP_1171387]
ENSSSCG00000039709	ENSSSCG00000039709	5.05319	CD4T	249.8	0.97565	4.15435	3.26213e-05	0.000364133
ENSSSCG00000020988	ENSSSCG00000020988	5.0525	Myeloid	116.533	0.617213	6.56582	5.17484e-11	4.6706e-10
ENSSSCG00000001455	ENSSSCG00000001455	5.05097	Myeloid	24965.5	0.298195	13.585	4.91785e-42	2.52045e-40	MHC class II histocompatibility antigen SLA-DRB1 precursor [Source:RefSeq peptide;Acc:NP_117167]
ENSSSCG00000032909	CDCA8	5.04937	NK	513.6	0.630057	6.42699	1.30159e-10	6.30948e-09	cell division cycle associated 8 [Source:HGNC Symbol;Acc:HGNC:14629]
ENSSSCG00000033721	ENSSSCG00000033721	5.04802	CD4T	25280.4	0.49751	8.13656	4.06682e-16	3.11371e-14
ENSSSCG00000037067	ENSSSCG00000037067	5.04611	SWC6gdT	141.533	0.564385	7.16907	7.55084e-13	3.85292e-11
ENSSSCG00000021511	GCSAM	5.04589	NK	376	0.570881	7.08711	1.36945e-12	8.90065e-11	germinal center-associated signaling and motility protein [Source:RefSeq peptide;Acc:NP_123159]
ENSSSCG00000017894	WSCD1	5.04378	CD4CD8T	286.733	0.441273	9.1639	5.00562e-20	8.43991e-18	WSC domain containing 1 [Source:HGNC Symbol;Acc:HGNC:296]
ENSSSCG00000040607	MAF	5.04351	CD4CD8T	1720	0.700946	5.76865	7.9908e-09	2.22938e-07	MAF bZIP transcription factor [Source:HGNC Symbol;Acc:HGNC:6776]
ENSSSCG00000029304	STEAP3	5.04137	CD21nB	618.867	0.46034	8.77911	1.64772e-18	1.01966e-16	STEAP3 metalloreductase [Source:HGNC Symbol;Acc:HGNC:24592]
ENSSSCG00000003231	NKG7	5.04244	NK	4620.07	0.530178	7.62469	2.44625e-14	2.03283e-12	protein NKG7 [Source:RefSeq peptide;Acc:NP_1231458]
ENSSSCG00000038912	IFITM3	5.04184	Myeloid	6073.2	0.283905	14.2366	5.43148e-46	3.25721e-44	interferon-induced transmembrane protein 3 [Source:RefSeq peptide;Acc:NP_1188311]
ENSSSCG00000010077	ENSSSCG00000010077	5.03979	CD21nB	597.8	0.803308	5.02894	4.93201e-07	8.3158e-06
ENSSSCG00000024518	ENSSSCG00000024518	5.03284	CD21nB	1268.87	0.30239	13.3365	1.41877e-40	3.00108e-38
ENSSSCG00000036314	HHEX	5.03832	Myeloid	1213.33	0.33617	12.0127	3.04551e-33	1.07044e-31	hematopoietically-expressed homeobox protein HHEX [Source:RefSeq peptide;Acc:NP_123158]
ENSSSCG00000036097	ENSSSCG00000036097	5.03736	CD8T	1052.93	0.583569	6.9184	4.56784e-12	1.50607e-10
ENSSSCG00000026583	TLR1	5.03693	CD21pB	1821.73	0.352148	11.4637	2.00733e-30	2.03072e-28	toll-like receptor 1 precursor [Source:RefSeq peptide;Acc:NP_126945]
ENSSSCG00000022536	SLC37A2	5.03679	CD21pB	687.067	0.508963	7.9314	2.16691e-15	7.61626e-14	solute carrier family 37 member 2 [Source:HGNC Symbol;Acc:HGNC:2644]
ENSSSCG00000007737	TPST1	5.03646	Myeloid	777.533	0.180399	22.3752	6.86698e-111	5.70646e-108	protein-tyrosine sulfotransferase 1 [Source:RefSeq peptide;Acc:NP_123122]
ENSSSCG00000039009	ENSSSCG00000039009	5.03533	SWC6gdT	59.4667	0.732601	5.50822	3.6249e-08	7.00533e-07
ENSSSCG00000014073	HEXB	5.03425	Myeloid	2635.87	0.213633	18.884	1.54369e-79	3.66516e-77	hexosaminidase subunit beta [Source:HGNC Symbol;Acc:HGNC:4879]
ENSSSCG00000006465	INSRR	5.03334	CD8T	203.2	0.488738	8.25256	1.55041e-16	7.89603e-15	insulin receptor related receptor [Source:HGNC Symbol;Acc:HGNC:693]
ENSSSCG00000011885	FBXO40	5.02533	CD21nB	90.1333	0.777353	5.17826	2.2397e-07	4.0273e-06	F-box protein 4 [Source:HGNC Symbol;Acc:HGNC:29816]
ENSSSCG00000000784	LRRK2	5.03269	CD21pB	3625	0.361955	11.1414	7.88653e-29	7.00396e-27	leucine-rich repeat serine/threonine-protein kinase 2 [Source:RefSeq peptide;Acc:NP_11698]
ENSSSCG00000008038	SLC9A3R2	5.03187	SWC6gdT	588.733	0.601932	6.69821	2.10983e-11	7.81713e-10	Na(+)/H(+) exchange regulatory cofactor NHE-RF2 [Source:RefSeq peptide;Acc:NP_1131111]
ENSSSCG00000003386	TNFRSF9	5.03107	NK	46.8667	1.36677	2.94933	0.00318462	0.0235387	tumor necrosis factor receptor superfamily member 9 [Source:RefSeq peptide;Acc:NP_12542]
ENSSSCG00000032723	ENSSSCG00000032723	5.03094	Myeloid	708.333	0.309551	13.0219	9.1893e-39	4.20899e-37
ENSSSCG00000017282	SCN4A	5.0301	CD21pB	39.6667	0.93852	4.29411	1.75399e-05	0.000172942	sodium voltage-gated channel alpha subunit 4 [Source:HGNC Symbol;Acc:HGNC:1591]
ENSSSCG00000014066	TMEM171	5.02861	CD21pB	52.3333	0.801906	5.02379	5.06621e-07	6.79036e-06	transmembrane protein 171 [Source:RefSeq peptide;Acc:NP_1231252]
ENSSSCG00000040579	ZNF683	5.02693	SWC6gdT	3771.07	0.309465	13.0126	1.03805e-38	1.09788e-35	zinc finger protein 683 [Source:HGNC Symbol;Acc:HGNC:28495]
ENSSSCG00000027053	PACSIN1	5.01856	CD21nB	555.733	0.363553	11.0536	2.10617e-28	2.37895e-26	protein kinase C and casein kinase substrate in neurons 1 [Source:HGNC Symbol;Acc:HGNC:857]
ENSSSCG00000037852	ENSSSCG00000037852	5.02531	CD4T	43.4	0.942219	4.27216	1.93592e-05	0.000228623
ENSSSCG00000029392	HUNK	5.0243	NK	22.9333	2.08892	1.9265	0.0540417	0.214354	hormonally up-regulated Neu-associated kinase [Source:HGNC Symbol;Acc:HGNC:13326]
ENSSSCG00000037910	DUSP6	5.02103	Myeloid	921.2	0.685082	5.86942	4.37335e-09	3.31679e-08	dual specificity protein phosphatase 6 [Source:RefSeq peptide;Acc:NP_1254771]
ENSSSCG00000008983	CCDC158	5.02086	SWC6gdT	47.2	0.676314	5.94526	2.76025e-09	6.71816e-08	coiled-coil domain containing 158 [Source:HGNC Symbol;Acc:HGNC:26374]
ENSSSCG00000040140	CD3E	5.02032	CD4CD8T	25628.6	0.942577	4.26524	1.99686e-05	0.000248329	T-cell surface glycoprotein CD3 epsilon chain precursor [Source:RefSeq peptide;Acc:NP_999392]
ENSSSCG00000033185	PPP2R3A	5.01968	Myeloid	101.867	0.436021	9.21902	2.99833e-20	5.20635e-19	protein phosphatase 2 regulatory subunit B''alpha [Source:HGNC Symbol;Acc:HGNC:937]
ENSSSCG00000009589	SYK	5.01714	CD21nB	7065.47	0.363742	11.0439	2.34501e-28	2.62326e-26	tyrosine-protein kinase SYK [Source:RefSeq peptide;Acc:NP_198422]
ENSSSCG00000033542	ENSSSCG00000033542	5.01008	CD21nB	358.533	0.56743	7.06709	1.58211e-12	5.78815e-11
ENSSSCG00000030484	AHR	5.01394	Myeloid	3045.73	0.352326	11.3927	4.54671e-30	1.38111e-28	aryl hydrocarbon receptor [Source:RefSeq peptide;Acc:NP_1289955]
ENSSSCG00000038003	ITK	5.01374	CD4T	8676.4	0.401909	9.98669	1.74308e-23	2.92427e-21	IL2 inducible T cell kinase [Source:HGNC Symbol;Acc:HGNC:6171]
ENSSSCG00000014875	CAPN5	5.01215	NK	80.3333	0.717826	5.5893	2.27981e-08	7.1108e-07	calpain 5 [Source:HGNC Symbol;Acc:HGNC:1482]
ENSSSCG00000005673	IER5L	5.01181	Myeloid	269.533	1.42036	2.8245	0.00473548	0.0152993	immediate early response 5 like [Source:HGNC Symbol;Acc:HGNC:23679]
ENSSSCG00000007909	ABAT	5.01117	CD8T	134.333	1.95278	2.05409	0.0399674	0.109947	4-aminobutyrate aminotransferase, mitochondrial [Source:UniProtKB/Swiss-Prot;Acc:P8147]
ENSSSCG00000001407	ENSSSCG00000001407	5.01012	NK	319.533	0.665926	6.02188	1.72405e-09	6.82232e-08
ENSSSCG00000029186	SEZ6L2	5.00465	CD21nB	178.933	0.59093	6.77686	1.2282e-11	4.02503e-10	seizure related 6 homolog like 2 [Source:HGNC Symbol;Acc:HGNC:3844]
ENSSSCG00000013498	EBI3	5.00821	Myeloid	115.733	0.467072	8.58157	9.35891e-18	1.38526e-16	interleukin-27 subunit beta precursor [Source:RefSeq peptide;Acc:NP_132611]
ENSSSCG00000038994	CLIC4	5.00754	CD21pB	1216.53	0.278131	14.4088	4.55331e-47	1.39403e-44	chloride intracellular channel 4 [Source:HGNC Symbol;Acc:HGNC:13518]
ENSSSCG00000010450	LIPA	5.00657	Myeloid	8754.8	0.374631	10.6947	1.07764e-26	2.63388e-25	lysosomal acid lipase/cholesteryl ester hydrolase precursor [Source:RefSeq peptide;Acc:NP_111666]
ENSSSCG00000027998	ENSSSCG00000027998	5.00352	CD21nB	222.6	0.984428	4.06685	4.76529e-05	0.000498919
ENSSSCG00000015412	CCDC146	4.99359	CD21nB	21.4667	1.48937	2.68139	0.0073318	0.0372812	coiled-coil domain containing 146 [Source:HGNC Symbol;Acc:HGNC:29296]
ENSSSCG00000000531	BICD1	5.00281	CD4CD8T	48.4667	0.733656	5.45598	4.87025e-08	1.14005e-06	BICD cargo adaptor 1 [Source:HGNC Symbol;Acc:HGNC:149]
ENSSSCG00000004209	PTPRK	5.00255	Myeloid	347.733	0.43829	9.1322	6.71199e-20	1.13664e-18	protein tyrosine phosphatase, receptor type K [Source:HGNC Symbol;Acc:HGNC:9674]
ENSSSCG00000008980	SCARB2	5.00174	Myeloid	2290.73	0.332823	12.0236	2.67008e-33	9.44187e-32	lysosome membrane protein 2 precursor [Source:RefSeq peptide;Acc:NP_123184]
ENSSSCG00000031902	ENSSSCG00000031902	4.99807	CD4CD8T	12349.5	0.484436	8.25305	1.54408e-16	1.63307e-14
ENSSSCG00000007718	CLDN4	4.98694	CD21nB	80	0.98989	4.02766	5.63351e-05	0.000577956	claudin-4 [Source:RefSeq peptide;Acc:NP_115519]
ENSSSCG00000040296	EHHADH	4.99317	Myeloid	176.8	0.403668	9.89222	4.4992e-23	9.1831e-22	enoyl-CoA hydratase and 3-hydroxyacyl CoA dehydrogenase [Source:HGNC Symbol;Acc:HGNC:3247]
ENSSSCG00000008038	SLC9A3R2	4.99216	NK	588.733	0.84228	4.7397	2.14032e-06	4.49468e-05	Na(+)/H(+) exchange regulatory cofactor NHE-RF2 [Source:RefSeq peptide;Acc:NP_1131111]
ENSSSCG00000024900	TRBV25-1	4.99184	CD4T	270.2	0.49745	8.0246	1.01855e-15	7.3079e-14	T cell receptor beta variable 25-1 [Source:HGNC Symbol;Acc:HGNC:1225]
ENSSSCG00000040415	ENSSSCG00000040415	4.98938	CD4CD8T	65.2667	0.751115	5.31128	1.08856e-07	2.33229e-06
ENSSSCG00000017277	PECAM1	4.98869	Myeloid	3103.8	0.265434	15.027	4.88321e-51	3.76233e-49	platelet endothelial cell adhesion molecule precursor [Source:RefSeq peptide;Acc:NP_99972]
ENSSSCG00000033641	COL8A2	4.98646	CD21nB	47.9333	0.97268	4.09843	4.15964e-05	0.000443161	collagen type VIII alpha 2 chain [Source:HGNC Symbol;Acc:HGNC:2216]
ENSSSCG00000008316	NAGK	4.98655	Myeloid	2257.4	0.191871	20.7773	6.95126e-96	2.99522e-93	N-acetylglucosamine kinase [Source:HGNC Symbol;Acc:HGNC:17174]
ENSSSCG00000025644	ENSSSCG00000025644	4.98316	CD21nB	5614.33	0.264854	15.0391	4.07324e-51	1.9745e-48	T-cell surface glycoprotein CD1a precursor [Source:RefSeq peptide;Acc:NP_998996]
ENSSSCG00000026605	BPI	4.98596	NK	106.667	0.971066	4.10472	4.04797e-05	0.000582848	bactericidal permeability-increasing protein precursor [Source:RefSeq peptide;Acc:NP_1152779]
ENSSSCG00000021519	CPNE2	4.98482	NK	1211.53	0.319457	12.4737	1.03849e-35	6.71211e-33	copine 2 [Source:HGNC Symbol;Acc:HGNC:2315]
ENSSSCG00000032911	DUSP8	4.98446	SWC6gdT	115.733	0.879424	4.53076	5.87732e-06	6.14346e-05	dual specificity phosphatase 8 [Source:HGNC Symbol;Acc:HGNC:374]
ENSSSCG00000015335	DYNC1I1	4.98162	CD21nB	176.8	3.96928	1.00311	0.315808	0.667022	dynein cytoplasmic 1 intermediate chain 1 [Source:HGNC Symbol;Acc:HGNC:2963]
ENSSSCG00000024860	ENSSSCG00000024860	4.98278	CD21pB	566.8	0.332659	11.9726	4.94634e-33	6.05744e-31
ENSSSCG00000009330	ALOX5AP	4.98207	Myeloid	1064.53	0.411624	9.67403	3.88755e-22	7.50046e-21	arachidonate 5-lipoxygenase-activating protein precursor [Source:RefSeq peptide;Acc:NP_1157473]
ENSSSCG00000002444	FBLN5	4.98193	CD4T	55.2667	0.853264	4.66671	3.06066e-06	4.48215e-05	fibulin 5 [Source:HGNC Symbol;Acc:HGNC:362]
ENSSSCG00000003684	MTCL1	4.98188	NK	257.133	1.08629	3.66558	0.000246777	0.00280646	microtubule crosslinking factor 1 [Source:HGNC Symbol;Acc:HGNC:29121]
ENSSSCG00000016718	NPY	4.97083	CD21nB	25.5333	1.07499	3.69383	0.000220905	0.00190512	pro-neuropeptide Y precursor [Source:RefSeq peptide;Acc:NP_1243296]
ENSSSCG00000007542	PRKAR1B	4.98061	NK	199.733	0.777191	5.12179	3.02646e-07	7.52347e-06	protein kinase cAMP-dependent type I regulatory subunit beta [Source:HGNC Symbol;Acc:HGNC:939]
ENSSSCG00000002814	ADGRG3	4.97939	Myeloid	100.2	0.588109	6.76641	1.32019e-11	1.26308e-10	adhesion G protein-coupled receptor G3 [Source:HGNC Symbol;Acc:HGNC:13728]
ENSSSCG00000025042	ICOS	4.97592	CD4CD8T	1734.07	0.248946	15.971	2.03549e-57	7.89363e-54
ENSSSCG00000006642	MINDY1	4.97544	Myeloid	959.8	0.238804	16.6473	3.16478e-62	3.91692e-60	MINDY lysine 48 deubiquitinase 1 [Source:HGNC Symbol;Acc:HGNC:25648]
ENSSSCG00000012053	CBR3	4.97496	CD21pB	224.2	0.562765	7.06327	1.62635e-12	4.26147e-11	carbonyl reductase [Source:RefSeq peptide;Acc:NP_1231661]
ENSSSCG00000016885	ITGA1	4.97288	NK	178.067	0.523004	7.59628	3.0477e-14	2.46229e-12	integrin subunit alpha 1 [Source:HGNC Symbol;Acc:HGNC:6134]
ENSSSCG00000016475	ENSSSCG00000016475	4.97237	CD4T	6325.07	0.456834	8.69543	3.45506e-18	3.23076e-16
ENSSSCG00000004318	RRAGD	4.97165	SWC6gdT	458.333	0.638887	6.21651	5.0832e-10	1.43539e-08	ras-related GTP-binding protein D [Source:RefSeq peptide;Acc:NP_123552]
ENSSSCG00000009448	DIAPH3	4.97145	NK	106.6	1.08617	3.65636	0.000255821	0.00289235	diaphanous related formin 3 [Source:HGNC Symbol;Acc:HGNC:1548]
ENSSSCG00000015638	RHEX	4.96477	CD21nB	19494.5	0.819826	4.83611	1.32404e-06	2.03218e-05	regulator of hemoglobinization and erythroid cell expansion [Source:HGNC Symbol;Acc:HGNC:25341]
ENSSSCG00000028076	ZBTB7C	4.97056	CD21pB	98.8667	0.647511	6.13203	8.67633e-10	1.67675e-08	zinc finger and BTB domain containing 7C [Source:HGNC Symbol;Acc:HGNC:317]
ENSSSCG00000016917	ANKRD55	4.96958	CD21pB	32.3333	0.939582	4.22483	2.39118e-05	0.000229768	ankyrin repeat domain 55 [Source:HGNC Symbol;Acc:HGNC:25681]
ENSSSCG00000022005	SFXN3	4.9694	Myeloid	499.067	0.440938	9.00217	2.21307e-19	3.64171e-18	sideroflexin 3 [Source:HGNC Symbol;Acc:HGNC:1687]
ENSSSCG00000035392	IGFBP2	4.96878	NK	273	0.878882	4.51571	6.31039e-06	0.000115797	Insulin-like growth factor-binding protein 2 [Source:UniProtKB/Swiss-Prot;Acc:P24853]
ENSSSCG00000038500	TRIB1	4.96813	Myeloid	902	0.662966	5.98543	2.1582e-09	1.68324e-08	tribbles pseudokinase 1 [Source:HGNC Symbol;Acc:HGNC:16891]
ENSSSCG00000011904	UPK1B	4.96723	Myeloid	56.0667	0.799365	4.96297	6.94228e-07	4.08944e-06	uroplakin-1b [Source:RefSeq peptide;Acc:NP_1116684]
ENSSSCG00000002954	SPINT2	4.96673	NK	1448.93	0.520649	7.61881	2.5602e-14	2.11244e-12	serine peptidase inhibitor, Kunitz type 2 [Source:HGNC Symbol;Acc:HGNC:11247]
ENSSSCG00000008509	RASGRP3	4.96596	CD21pB	1201.87	0.248355	15.9689	2.10456e-57	1.28866e-54	RAS guanyl releasing protein 3 [Source:HGNC Symbol;Acc:HGNC:14545]
ENSSSCG00000011090	NEBL	4.96526	CD8T	184.467	0.353727	11.21	3.64376e-29	6.495e-27	nebulette [Source:HGNC Symbol;Acc:HGNC:16932]
ENSSSCG00000004139	ADGRG6	4.9652	Myeloid	67	0.705308	5.62195	1.88817e-08	1.34519e-07	adhesion G protein-coupled receptor G6 [Source:HGNC Symbol;Acc:HGNC:13841]
ENSSSCG00000005191	MPDZ	4.96513	NK	103.133	1.01269	3.91544	9.02379e-05	0.00117038	multiple PDZ domain crumbs cell polarity complex component [Source:HGNC Symbol;Acc:HGNC:728]
ENSSSCG00000013599	ANGPTL4	4.94995	CD21nB	723.867	0.221039	17.8699	2.02307e-71	3.36234e-68	Angiopoietin-related protein 4 [Source:UniProtKB/Swiss-Prot;Acc:Q2TNK5]
ENSSSCG00000003259	OSCAR	4.95867	Myeloid	105.133	0.539159	7.34231	2.09942e-13	2.31294e-12	osteoclast associated, immunoglobulin-like receptor [Source:HGNC Symbol;Acc:HGNC:2996]
ENSSSCG00000008510	LTBP1	4.95789	CD8T	1267.27	0.36801	10.7548	5.62333e-27	8.22447e-25	latent transforming growth factor beta binding protein 1 [Source:HGNC Symbol;Acc:HGNC:6714]
ENSSSCG00000036589	BEGAIN	4.95749	SWC6gdT	93.6	0.783457	5.05133	4.38755e-07	6.27857e-06	brain enriched guanylate kinase associated [Source:HGNC Symbol;Acc:HGNC:24163]
ENSSSCG00000038351	ENSSSCG00000038351	4.9551	CD4CD8T	169.867	0.545944	7.24453	4.33943e-13	2.83623e-11
ENSSSCG00000032637	EVC	4.95243	SWC6gdT	77.5333	0.927284	4.26237	2.02274e-05	0.000179091	EvC ciliary complex subunit 1 [Source:HGNC Symbol;Acc:HGNC:3497]
ENSSSCG00000032795	IL18R1	4.95157	CD4CD8T	3266.27	0.548139	7.20907	5.6337e-13	3.62113e-11	interleukin-18 receptor 1 precursor [Source:RefSeq peptide;Acc:NP_999263]
ENSSSCG00000012076	MX2	4.95037	Myeloid	1667.87	0.358044	11.0332	2.6435e-28	7.20244e-27	Interferon-induced GTP-binding protein Mx2 [Source:UniProtKB/Swiss-Prot;Acc:A7VK]
ENSSSCG00000017923	ALOX15	4.94263	CD21nB	143.2	0.488447	8.07178	6.92827e-16	3.47429e-14	arachidonate 15-lipoxygenase [Source:RefSeq peptide;Acc:NP_99996]
ENSSSCG00000008866	GUCY1A1	4.94957	CD21pB	70.4667	0.827309	4.774	1.80603e-06	2.18413e-05	guanylate cyclase soluble subunit alpha-3 [Source:RefSeq peptide;Acc:NP_11843]
ENSSSCG00000022988	TSPEAR	4.9489	SWC6gdT	60.5333	1.1013	3.58569	0.000336192	0.00201715	thrombospondin type laminin G domain and EAR repeats [Source:HGNC Symbol;Acc:HGNC:1268]
ENSSSCG00000034308	LRMDA	4.94764	NK	81.6667	1.05273	3.7499	0.000176907	0.0021138	leucine rich melanocyte differentiation associated [Source:HGNC Symbol;Acc:HGNC:2345]
ENSSSCG00000027063	DPY19L1	4.94693	SWC6gdT	1929	0.414009	9.53345	1.52138e-21	3.16066e-19	dpy-19 like C-mannosyltransferase 1 [Source:HGNC Symbol;Acc:HGNC:2225]
ENSSSCG00000039581	ENSSSCG00000039581	4.94656	SWC6gdT	9576.4	0.401788	9.82248	9.00973e-23	2.18373e-20
ENSSSCG00000033703	FAM111A	4.94617	CD4CD8T	1397.93	0.455574	8.66197	4.63668e-18	6.20036e-16	family with sequence similarity 111 member A [Source:HGNC Symbol;Acc:HGNC:24725]
ENSSSCG00000004254	DCBLD1	4.94539	Myeloid	138.667	0.473898	8.3254	8.4044e-17	1.1752e-15	discoidin, CUB and LCCL domain containing 1 [Source:HGNC Symbol;Acc:HGNC:21479]
ENSSSCG00000008842	KIT	4.93625	CD21nB	865.6	0.574586	6.85059	7.35445e-12	2.46575e-10	mast/stem cell growth factor receptor Kit precursor [Source:RefSeq peptide;Acc:NP_13799]
ENSSSCG00000009002	TLR2	4.9421	CD21pB	1105.07	0.335721	11.7422	7.74654e-32	8.83562e-30	toll-like receptor 2 precursor [Source:RefSeq peptide;Acc:NP_998926]
ENSSSCG00000039574	ENSSSCG00000039574	4.9413	CD21pB	224.867	2.02946	1.94205	0.0521315	0.159287
ENSSSCG00000012985	LTBP3	4.93994	CD4T	238.867	0.681579	5.7806	7.44335e-09	1.88279e-07	latent transforming growth factor beta binding protein 3 [Source:HGNC Symbol;Acc:HGNC:6716]
ENSSSCG00000016718	NPY	4.93961	CD8T	25.5333	1.07513	3.66432	0.000247996		pro-neuropeptide Y precursor [Source:RefSeq peptide;Acc:NP_1243296]
ENSSSCG00000000633	YBX3	4.93898	SWC6gdT	6824.93	0.450534	8.7429	2.27198e-18	2.78234e-16	Y-box binding protein 3 [Source:HGNC Symbol;Acc:HGNC:2428]
ENSSSCG00000023662	CHST3	4.93844	CD4CD8T	145.4	0.623647	6.31518	2.69853e-10	1.04301e-08	carbohydrate sulfotransferase 3 [Source:HGNC Symbol;Acc:HGNC:1971]
ENSSSCG00000003282	ENSSSCG00000003282	4.93813	NK	654.6	0.981895	4.01074	6.05283e-05	0.000828455
ENSSSCG00000036418	SLC8A1	4.93374	CD21nB	438.067	1.74643	2.25245	0.024294	0.0949718	solute carrier family 8 member A1 [Source:HGNC Symbol;Acc:HGNC:1168]
ENSSSCG00000003733	KLHL14	4.93057	CD21nB	45.4	1.05084	3.74041	0.000183721	0.00161802	kelch like family member 14 [Source:HGNC Symbol;Acc:HGNC:29266]
ENSSSCG00000002436	TTC7B	4.93272	NK	160.8	0.757895	5.18901	2.11418e-07	5.38215e-06	tetratricopeptide repeat domain 7B [Source:HGNC Symbol;Acc:HGNC:19858]
ENSSSCG00000035571	ENSSSCG00000035571	4.93001	CD21nB	89.4667	0.684822	5.73873	9.53903e-09	2.10983e-07
ENSSSCG00000013114	SLC15A3	4.92835	CD21nB	1255.33	0.596225	6.5887	4.43683e-11	1.35837e-09	solute carrier family 15 member 3 [Source:HGNC Symbol;Acc:HGNC:1868]
ENSSSCG00000038543	CENPA	4.92885	NK	527.533	0.634828	6.18884	6.06077e-10	2.63101e-08	centromere protein A [Source:HGNC Symbol;Acc:HGNC:1851]
ENSSSCG00000000749	SLC6A12	4.92622	CD21nB	28.5333	1.3747	2.85606	0.00428939	0.0241193	solute carrier family 6 member 12 [Source:HGNC Symbol;Acc:HGNC:1145]
ENSSSCG00000014960	AMOTL1	4.92707	SWC6gdT	34.9333	0.780931	5.0287	4.93804e-07	6.97199e-06	angiomotin like 1 [Source:HGNC Symbol;Acc:HGNC:17811]
ENSSSCG00000015535	QSOX1	4.92659	Myeloid	871.4	0.420377	9.34064	9.57498e-21	1.71014e-19	quiescin sulfhydryl oxidase 1 [Source:HGNC Symbol;Acc:HGNC:9756]
ENSSSCG00000001453	HLA-DRA	4.91841	CD21nB	52678.1	0.344658	11.369	5.96797e-30	7.62982e-28	MHC class II DR-alpha precursor [Source:RefSeq peptide;Acc:NP_117178]
ENSSSCG00000002908	ZBTB32	4.92475	CD21pB	1777.07	0.333624	11.764	5.98368e-32	6.89249e-30	zinc finger and BTB domain containing 32 [Source:HGNC Symbol;Acc:HGNC:16763]
ENSSSCG00000015707	GPR39	4.92339	CD8T	24.8667	1.43517	2.73374	0.00626195		G protein-coupled receptor 39 [Source:HGNC Symbol;Acc:HGNC:4496]
ENSSSCG00000024088	TLN2	4.92233	NK	48	1.08207	3.62485	0.000289131	0.00321582	talin 2 [Source:HGNC Symbol;Acc:HGNC:15447]
ENSSSCG00000032015	SH3BGRL2	4.92128	CD4T	317.333	0.588965	6.65793	2.77718e-11	1.0813e-09	SH3 domain binding glutamate rich protein like 2 [Source:HGNC Symbol;Acc:HGNC:15567]
ENSSSCG00000010521	UBTD1	4.92113	Myeloid	279.333	0.39699	9.87715	5.22971e-23	1.05997e-21	ubiquitin domain containing 1 [Source:HGNC Symbol;Acc:HGNC:25683]
ENSSSCG00000015476	CHI3L1	4.91774	CD21nB	856.133	0.680581	5.75646	8.58956e-09	1.90708e-07	chitinase-3-like protein 1 precursor [Source:RefSeq peptide;Acc:NP_1154]
ENSSSCG00000024351	MET	4.90113	CD21nB	38.2667	4.00489	0.974091	0.330011	0.687563	Hepatocyte growth factor receptor [Source:UniProtKB/Swiss-Prot;Acc:Q2QLE]
ENSSSCG00000007235	TPX2	4.9177	NK	1654.07	0.483969	8.09494	5.72906e-16	6.40884e-14	TPX2, microtubule nucleation factor [Source:HGNC Symbol;Acc:HGNC:1249]
ENSSSCG00000002852	PLEKHF1	4.91554	CD8T	409.2	0.474774	8.24716	1.62199e-16	8.22386e-15	pleckstrin homology and FYVE domain containing 1 [Source:HGNC Symbol;Acc:HGNC:2764]
ENSSSCG00000014182	SLCO4C1	4.91516	Myeloid	183.067	0.4048	9.67184	3.97173e-22	7.65018e-21	solute carrier organic anion transporter family member 4C1 [Source:HGNC Symbol;Acc:HGNC:23612]
ENSSSCG00000036635	TRAV6	4.91399	CD4T	68.0667	0.801718	4.882	1.05014e-06	1.71142e-05	T cell receptor alpha variable 6 [Source:HGNC Symbol;Acc:HGNC:12144]
ENSSSCG00000007240	HCK	4.91234	CD21pB	3048.47	0.447915	8.73455	2.44628e-18	1.1384e-16	HCK proto-oncogene, Src family tyrosine kinase [Source:HGNC Symbol;Acc:HGNC:484]
ENSSSCG00000040826	ENSSSCG00000040826	4.91117	CD21pB	27.4	1.29018	3.0315	0.00243341	0.0130462
ENSSSCG00000001850	ENSSSCG00000001850	4.91044	Myeloid	561	0.261831	14.935	1.95023e-50	1.45442e-48	arpin [Source:RefSeq peptide;Acc:NP_1231473]
ENSSSCG00000005095	PRKCH	4.90796	NK	4513.6	0.286279	13.6509	1.99484e-42	1.78523e-39	protein kinase C eta [Source:HGNC Symbol;Acc:HGNC:943]
ENSSSCG00000006250	LYN	4.90735	CD21pB	6908.53	0.305393	12.7945	1.76014e-37	2.92535e-35	LYN proto-oncogene, Src family tyrosine kinase [Source:HGNC Symbol;Acc:HGNC:6735]
ENSSSCG00000040449	ABHD12	4.90726	Myeloid	1181.33	0.188812	20.6939	3.92692e-95	1.63164e-92	abhydrolase domain containing 12 [Source:HGNC Symbol;Acc:HGNC:15868]
ENSSSCG00000036190	GIPC3	4.90553	CD4T	1698.4	0.299807	13.0268	8.61612e-39	5.78192e-36	GIPC PDZ domain containing family member 3 [Source:HGNC Symbol;Acc:HGNC:18183]
ENSSSCG00000013517	UHRF1	4.90429	NK	3081.13	0.672481	5.8058	6.40609e-09	2.29318e-07	ubiquitin like with PHD and ring finger domains 1 [Source:HGNC Symbol;Acc:HGNC:12556]
ENSSSCG00000040986	ENSSSCG00000040986	4.90293	NK	28.8667	5.2709	0.740466	0.459017	0.913636
ENSSSCG00000001613	TREML1	4.90288	CD4CD8T	27.0667	1.63556	2.38626	0.0170206	0.0725341	trem-like transcript 1 protein precursor [Source:RefSeq peptide;Acc:NP_123433]
ENSSSCG00000012591	AMOT	4.90173	Myeloid	41	0.773566	5.04382	4.56334e-07	2.75505e-06	angiomotin [Source:HGNC Symbol;Acc:HGNC:1781]
ENSSSCG00000008147	FHL2	4.89116	CD21nB	452.533	1.21611	3.19967	0.00137584	0.0092577	four and a half LIM domains 2 [Source:HGNC Symbol;Acc:HGNC:373]
ENSSSCG00000022492	AMPD3	4.90069	CD21pB	886.133	0.506606	7.69965	1.36435e-14	4.44618e-13	adenosine monophosphate deaminase 3 [Source:HGNC Symbol;Acc:HGNC:47]
ENSSSCG00000038508	SPTBN2	4.90021	CD8T	50.4667	0.673046	5.79487	6.83745e-09	1.43649e-07	spectrin beta, non-erythrocytic 2 [Source:HGNC Symbol;Acc:HGNC:11276]
ENSSSCG00000016477	TRBV24-1	4.89641	CD4T	83.9333	0.670587	5.81044	6.23091e-09	1.59735e-07	T cell receptor beta variable 24-1 [Source:HGNC Symbol;Acc:HGNC:1223]
ENSSSCG00000011806	MASP1	4.89363	CD8T	66.4	0.896331	4.34396	1.39939e-05	0.000134379	mannan-binding lectin serine protease 1 precursor [Source:RefSeq peptide;Acc:NP_1171876]
ENSSSCG00000013241	NR1H3	4.89167	Myeloid	449	0.392561	9.91354	3.63544e-23	7.44624e-22	oxysterols receptor LXR-alpha [Source:RefSeq peptide;Acc:NP_195284]
ENSSSCG00000015930	DHRS9	4.88936	CD21nB	1062.8	0.278359	13.9724	2.29666e-44	7.22143e-42	dehydrogenase/reductase 9 [Source:HGNC Symbol;Acc:HGNC:16888]
ENSSSCG00000004165	PDE7B	4.89114	Myeloid	138.467	0.656761	5.92474	3.12783e-09	2.39402e-08	phosphodiesterase 7B [Source:HGNC Symbol;Acc:HGNC:8792]
ENSSSCG00000032611	ENSSSCG00000032611	4.89107	CD4T	320.533	0.40364	9.63995	5.4217e-22	7.73134e-20
ENSSSCG00000010509	PIK3AP1	4.89066	SWC6gdT	10423.3	0.242601	16.0373	7.01932e-58	2.04157e-54	phosphoinositide 3-kinase adapter protein 1 [Source:RefSeq peptide;Acc:NP_1231432]
ENSSSCG00000009125	ANK2	4.88995	CD4CD8T	29.4	1.15937	3.35522	0.000793015	0.00616295	ankyrin 2 [Source:HGNC Symbol;Acc:HGNC:493]
ENSSSCG00000000640	ENSSSCG00000000640	4.88807	CD21nB	620.333	0.449605	8.64775	5.25248e-18	3.10189e-16
ENSSSCG00000022675	NCR1	4.88521	CD21nB	279.067	0.849982	4.57094	4.85552e-06	6.44853e-05	natural cytotoxicity triggering receptor 1 precursor [Source:RefSeq peptide;Acc:NP_1116615]
ENSSSCG00000031916	ENSSSCG00000031916	4.8877	Myeloid	71.7333	0.793938	4.89673	9.74443e-07	5.64013e-06
ENSSSCG00000032956	C16orf45	4.88571	SWC6gdT	117.2	0.995665	3.90263	9.51538e-05	0.000685886	chromosome 16 open reading frame 45 [Source:HGNC Symbol;Acc:HGNC:19213]
ENSSSCG00000037360	CST3	4.88233	CD21nB	14779.5	0.488342	7.95002	1.86478e-15	8.89133e-14	cystatin-C precursor [Source:RefSeq peptide;Acc:NP_13867]
ENSSSCG00000004588	CCNB2	4.88257	NK	439.733	0.604715	6.4205	1.35828e-10	6.55692e-09	G2/mitotic-specific cyclin-B2 [Source:RefSeq peptide;Acc:NP_117754]
ENSSSCG00000032156	GPR146	4.87773	CD21nB	488.067	0.698501	5.55149	2.83239e-08	5.89482e-07	G protein-coupled receptor 146 [Source:HGNC Symbol;Acc:HGNC:21718]
ENSSSCG00000035020	STK32B	4.87871	SWC6gdT	75.1333	0.798766	4.85588	1.19855e-06	1.52894e-05	serine/threonine kinase 32B [Source:HGNC Symbol;Acc:HGNC:14217]
ENSSSCG00000005249	FAM189A2	4.87797	Myeloid	94	0.515066	7.52908	5.11e-14	5.86868e-13	family with sequence similarity 189 member A2 [Source:HGNC Symbol;Acc:HGNC:2482]
ENSSSCG00000001457	SLA-DQB1	4.85768	CD21nB	27831.5	0.279369	13.8086	2.26282e-43	6.26802e-41	SLA class II histocompatibility antigen, DQ haplotype C beta chain precursor [Source:RefSeq peptide;Acc:NP_117166]
ENSSSCG00000038138	TFEC	4.87692	CD21pB	212.933	0.632152	6.13289	8.62979e-10	1.67053e-08	transcription factor EC [Source:HGNC Symbol;Acc:HGNC:11754]
ENSSSCG00000032015	SH3BGRL2	4.87674	CD4CD8T	317.333	0.588988	6.58203	4.64067e-11	2.11724e-09	SH3 domain binding glutamate rich protein like 2 [Source:HGNC Symbol;Acc:HGNC:15567]
ENSSSCG00000039709	ENSSSCG00000039709	4.87457	CD8T	249.8	0.975761	3.97082	7.16254e-05	0.000557369
ENSSSCG00000000179	CCDC65	4.87323	CD8T	153.4	0.482578	8.02613	1.00595e-15	4.73263e-14	coiled-coil domain containing 65 [Source:HGNC Symbol;Acc:HGNC:29937]
ENSSSCG00000035403	RFX2	4.87078	NK	430.2	0.410355	9.43277	3.99393e-21	8.93565e-19	regulatory factor X2 [Source:HGNC Symbol;Acc:HGNC:9983]
ENSSSCG00000000705	CD27	4.86946	SWC6gdT	6568.33	1.14781	3.37116	0.000748522	0.00392474	CD27 antigen precursor [Source:RefSeq peptide;Acc:NP_1265692]
ENSSSCG00000036264	ENSSSCG00000036264	4.86886	NK	125.533	1.25273	3.08834	0.00201275	0.0163408
ENSSSCG00000028327	RHOBTB1	4.86758	NK	276.133	0.461794	8.37512	5.51694e-17	6.90151e-15	Rho related BTB domain containing 1 [Source:HGNC Symbol;Acc:HGNC:18738]
ENSSSCG00000021343	ZEB2	4.86674	Myeloid	3945.67	0.538714	7.17771	7.08868e-13	7.47685e-12	zinc finger E-box binding homeobox 2 [Source:HGNC Symbol;Acc:HGNC:14881]
ENSSSCG00000015618	LAMB3	4.86664	NK	97.5333	1.158	3.33908	0.000840574	0.00785481	laminin subunit beta 3 [Source:HGNC Symbol;Acc:HGNC:649]
ENSSSCG00000013115	CD5	4.86621	CD4CD8T	11111.7	0.475422	8.13216	4.21704e-16	4.22883e-14	T-cell surface glycoprotein CD5 precursor [Source:RefSeq peptide;Acc:NP_1231729]
ENSSSCG00000039362	ENSSSCG00000039362	4.86549	CD4T	311.067	0.890258	4.34198	1.41204e-05	0.00017377
ENSSSCG00000034656	RTN4R	4.86377	NK	161.867	1.07982	3.57817	0.000346007	0.00376209	reticulon 4 receptor [Source:HGNC Symbol;Acc:HGNC:1861]
ENSSSCG00000016657	AOAH	4.86344	NK	3031.67	0.462528	8.35288	6.66204e-17	8.15855e-15	acyloxyacyl hydrolase [Source:HGNC Symbol;Acc:HGNC:548]
ENSSSCG00000002815	ADGRG1	4.8634	CD8T	13252.3	0.464141	8.32377	8.52089e-17	4.52123e-15	adhesion G-protein coupled receptor G1 precursor [Source:RefSeq peptide;Acc:NP_1229985]
ENSSSCG00000039362	ENSSSCG00000039362	4.86179	CD4CD8T	311.067	0.890261	4.33782	1.43903e-05	0.000187268
ENSSSCG00000017203	GALK1	4.86137	Myeloid	389.6	0.497459	7.76218	8.34827e-15	1.02451e-13	galactokinase 1 [Source:HGNC Symbol;Acc:HGNC:4118]
ENSSSCG00000016535	CALD1	4.8597	CD4CD8T	83.9333	1.01774	3.79241	0.000149195	0.00146275	caldesmon 1 [Source:HGNC Symbol;Acc:HGNC:1441]
ENSSSCG00000002412	STON2	4.85699	CD21nB	74.4667	1.38496	2.78491	0.00535426	0.0288235	stonin 2 [Source:HGNC Symbol;Acc:HGNC:3652]
ENSSSCG00000001455	ENSSSCG00000001455	4.85761	CD21pB	24965.5	0.298199	12.9364	2.80561e-38	4.94552e-36	MHC class II histocompatibility antigen SLA-DRB1 precursor [Source:RefSeq peptide;Acc:NP_117167]
ENSSSCG00000036208	ENSSSCG00000036208	4.85468	CD21nB	264.4	0.747309	5.15807	2.49502e-07	4.41142e-06
ENSSSCG00000037910	DUSP6	4.85582	NK	921.2	0.958981	4.02075	5.80143e-05	0.00079969	dual specificity protein phosphatase 6 [Source:RefSeq peptide;Acc:NP_1254771]
ENSSSCG00000037019	CAMK4	4.85582	CD4CD8T	3469.27	0.41886	9.20551	3.40039e-20	6.18127e-18	calcium/calmodulin dependent protein kinase IV [Source:HGNC Symbol;Acc:HGNC:1464]
ENSSSCG00000010476	MYOF	4.8551	Myeloid	1898.4	0.454179	8.48805	2.10139e-17	3.03696e-16	myoferlin [Source:HGNC Symbol;Acc:HGNC:3656]
ENSSSCG00000025005	B4GALT6	4.85356	CD21nB	316.667	0.779632	4.9428	7.70085e-07	1.25655e-05	beta-1,4-galactosyltransferase 6 [Source:HGNC Symbol;Acc:HGNC:929]
ENSSSCG00000007478	ATP9A	4.85405	Myeloid	188.467	0.79545	4.84512	1.26533e-06	7.22318e-06	probable phospholipid-transporting ATPase IIA [Source:RefSeq peptide;Acc:NP_118144]
ENSSSCG00000039621	ENSSSCG00000039621	4.85281	CD21nB	186.533	1.11468	3.45643	0.000547388	0.00422302
ENSSSCG00000000492	LYZ	4.83736	CD21nB	4033.13	0.953051	4.0264	5.66377e-05	0.000580549	lysozyme C-3 precursor [Source:RefSeq peptide;Acc:NP_999557]
ENSSSCG00000007425	SNX21	4.85277	Myeloid	90.7333	0.701063	5.49561	3.8936e-08	2.67719e-07	sorting nexin family member 21 [Source:HGNC Symbol;Acc:HGNC:16154]
ENSSSCG00000003554	ENSSSCG00000003554	4.85249	Myeloid	441	0.436635	8.82314	1.11297e-18	1.76167e-17
ENSSSCG00000038948	ETS2	4.85232	SWC6gdT	1320.67	0.570088	6.7574	1.40485e-11	5.3412e-10	ETS proto-oncogene 2, transcription factor [Source:HGNC Symbol;Acc:HGNC:3489]
ENSSSCG00000008510	LTBP1	4.85068	Myeloid	1267.27	0.368038	10.4627	1.28132e-25	2.99937e-24	latent transforming growth factor beta binding protein 1 [Source:HGNC Symbol;Acc:HGNC:6714]
ENSSSCG00000013115	CD5	4.85051	CD4T	11111.7	0.475423	8.09914	5.53503e-16	4.15418e-14	T-cell surface glycoprotein CD5 precursor [Source:RefSeq peptide;Acc:NP_1231729]
ENSSSCG00000015846	RBPMS	4.84807	NK	551.533	0.574418	6.69908	2.09743e-11	1.14561e-09	RNA binding protein, mRNA processing factor [Source:HGNC Symbol;Acc:HGNC:1997]
ENSSSCG00000032445	ENSSSCG00000032445	4.84753	Myeloid	35.6	0.96615	3.98234	6.82413e-05	0.00030598
ENSSSCG00000012699	ENSSSCG00000012699	4.84741	Myeloid	393.067	0.471476	8.16036	3.34018e-16	4.44111e-15	four and a half LIM domains protein 1 [Source:RefSeq peptide;Acc:NP_99954]
ENSSSCG00000016258	DNER	4.84653	CD8T	105.133	0.638262	6.02657	1.67475e-09	3.84417e-08	delta/notch like EGF repeat containing [Source:HGNC Symbol;Acc:HGNC:24456]
ENSSSCG00000017923	ALOX15	4.84517	CD21pB	143.2	0.488573	7.87021	3.54048e-15	1.20438e-13	arachidonate 15-lipoxygenase [Source:RefSeq peptide;Acc:NP_99996]
ENSSSCG00000024900	TRBV25-1	4.84194	CD4CD8T	270.2	0.497654	7.72011	1.16234e-14	9.87055e-13	T cell receptor beta variable 25-1 [Source:HGNC Symbol;Acc:HGNC:1225]
ENSSSCG00000004458	TPBG	4.84166	CD21pB	52	0.842	4.56254	5.05397e-06	5.60513e-05	trophoblast glycoprotein [Source:HGNC Symbol;Acc:HGNC:124]
ENSSSCG00000017356	FAM171A2	4.84004	NK	42.4	1.18363	3.24428	0.00117747	0.0104811	family with sequence similarity 171 member A2 [Source:HGNC Symbol;Acc:HGNC:348]
ENSSSCG00000016480	ENSSSCG00000016480	4.8397	NK	1640.13	0.51491	7.45703	8.84943e-14	6.81817e-12
ENSSSCG00000009859	TESC	4.83954	NK	1144.53	0.252827	15.1865	4.34737e-52	1.68591e-48	tescalcin [Source:HGNC Symbol;Acc:HGNC:2665]
ENSSSCG00000007691	ZP3	4.83727	CD21nB	174.8	0.636317	6.03044	1.63513e-09	4.04746e-08	zona pellucida sperm-binding protein 3 precursor [Source:RefSeq peptide;Acc:NP_99958]
ENSSSCG00000032578	TNFRSF17	4.81539	CD21nB	562.467	0.405225	9.4155	4.70831e-21	3.48895e-19	TNF receptor superfamily member 17 [Source:HGNC Symbol;Acc:HGNC:11913]
ENSSSCG00000029267	TIGIT	4.83474	CD4CD8T	585.267	0.448874	8.54302	1.30758e-17	1.63574e-15	T cell immunoreceptor with Ig and ITIM domains [Source:HGNC Symbol;Acc:HGNC:26838]
[truncated: 91,074 more rows]

## Sheet: Specific genes
Supplementary File 2. Specific genes in sorted porcine immune cells
EnsemblID	Symbol	Cell type	baseMean_CD21pB-CD21nB	log2FoldChange_CD21pB-CD21nB	lfcSE_CD21pB-CD21nB	stat_CD21pB-CD21nB	pvalue_CD21pB-CD21nB	padj_CD21pB-CD21nB	log2FoldChange_CD21pB-CD8-CD4+	lfcSE_CD21pB-CD8-CD4+	stat_CD21pB-CD8-CD4+	pvalue_CD21pB-CD8-CD4+	padj_CD21pB-CD8-CD4+	log2FoldChange_CD21pB-CD8T	lfcSE_CD21pB-CD8T	stat_CD21pB-CD8T	pvalue_CD21pB-CD8T	padj_CD21pB-CD8T	log2FoldChange_CD21pB-CD8+CD4+	lfcSE_CD21pB-CD8+CD4+	stat_CD21pB-CD8+CD4+	pvalue_CD21pB-CD8+CD4+	padj_CD21pB-CD8+CD4+	log2FoldChange_CD21pB-GD-TCR	lfcSE_CD21pB-GD-TCR	stat_CD21pB-GD-TCR	pvalue_CD21pB-GD-TCR	padj_CD21pB-GD-TCR	log2FoldChange_CD21pB-Myeloid	lfcSE_CD21pB-Myeloid	stat_CD21pB-Myeloid	pvalue_CD21pB-Myeloid	padj_CD21pB-Myeloid	log2FoldChange_CD21pB-NK	lfcSE_CD21pB-NK	stat_CD21pB-NK	pvalue_CD21pB-NK	padj_CD21pB-NK	Description
ENSSSCG00000000660	A2M	Myeloid	1933.67	12.2195	0.811376	13.8278	1.73328e-43	6.95345e-41	11.4332	0.719341	14.5039	1.14521e-47	4.29786e-45	8.47806	0.589607	12.6831	7.33635e-37	8.89073e-35	10.9467	0.67951	14.638	1.60632e-48	3.46072e-46	9.84974	0.62261	14.214	7.5067e-46	1.53216e-43	11.6735	0.743441	14.3569	9.6414e-47	2.003e-44	13.7014	1.6132	7.87341	3.45105e-15	1.47068e-13	alpha-2-macroglobulin [Source:HGNC Symbol;Acc:HGNC:7]
ENSSSCG00000017257	ABCA9	Myeloid	306.933	10.0896	1.94504	4.67322	2.96515e-06	3.96968e-05	10.5105	1.99252	4.77312	1.81393e-06	1.96492e-05	10.5105	1.99252	4.77312	1.81393e-06	1.81455e-05	11.2889	2.11935	4.85473	1.20552e-06	1.21639e-05	8.724	1.85492	4.16407	3.12628e-05	0.000263684	10.7207	2.02121	4.80937	1.51404e-06	1.55056e-05	10.5509	2.68735	3.55403	0.000379381	0.00319141	ATP binding cassette subfamily A member 9 [Source:HGNC Symbol;Acc:HGNC:39]
ENSSSCG00000040449	ABHD12	Myeloid	1181.33	3.70111	0.253794	10.6429	1.88126e-26	2.27985e-24	4.26276	0.255877	12.7513	3.06767e-37	6.04904e-35	3.98865	0.254762	11.7312	8.82332e-32	7.43845e-30	3.60562	0.253512	10.2781	8.8458e-25	4.85434e-23	3.92747	0.25454	11.501	1.30359e-30	1.05319e-28	4.73523	0.258358	14.4576	2.24558e-47	5.02405e-45	2.54151	0.316336	4.873	1.09918e-06	1.526e-05	abhydrolase domain containing 12 [Source:HGNC Symbol;Acc:HGNC:15868]
ENSSSCG00000001782	ABHD17C	Myeloid	146.6	5.2693	0.799468	5.34017	9.28574e-08	1.61722e-06	7.61259	0.897918	7.36436	1.78004e-13	4.73889e-12	4.35608	0.787335	4.26258	2.02084e-05	0.000172364	6.36504	0.828139	6.47843	9.26828e-11	1.58803e-09	6.11092	0.819545	6.23629	4.48069e-10	7.31113e-09	6.78429	0.8458	6.83884	7.98379e-12	1.52019e-10	5.37542	1.01603	4.3064	1.65932e-05	0.000183999	abhydrolase domain containing 17C [Source:HGNC Symbol;Acc:HGNC:26925]
ENSSSCG00000013242	ACP2	Myeloid	682.533	3.51773	0.412641	6.10151	1.0507e-09	2.41101e-08	3.21386	0.411583	5.37889	7.49457e-08	9.72039e-07	2.57436	0.409962	3.84027	0.000122901	0.000933916	2.70575	0.410239	4.15794	3.21125e-05	0.000258902	2.45585	0.409732	3.55317	0.000380623	0.00268211	2.24026	0.409359	3.02975	0.00244759	0.0148463	3.01625	0.516654	3.90252	9.51976e-05	0.000901648	lysosomal acid phosphatase precursor [Source:RefSeq peptide;Acc:NP_001231669]
ENSSSCG00000000233	ACVR1B	Myeloid	129.133	4.68014	0.474456	7.75654	8.7277e-15	3.63936e-13	5.43198	0.496341	8.9293	4.28716e-19	2.04973e-17	5.74916	0.50913	9.32799	1.07902e-20	4.34371e-19	8.16893	0.736483	9.734	2.15928e-22	1.01447e-20	5.53501	0.500226	9.06592	1.23555e-19	5.17066e-18	6.28706	0.537256	9.84086	7.50648e-23	3.56451e-21	5.96298	0.687584	7.21799	5.27622e-13	1.71462e-11	activin receptor type-1B precursor [Source:RefSeq peptide;Acc:NP_001182251]
ENSSSCG00000015669	ACVR2A	SWC6gdT	682.267	3.52568	0.814956	3.09916	0.0019407	0.0285076	7.11371	0.833752	7.33277	2.25448e-13	8.80157e-12	4.40703	0.816407	4.1732	3.00355e-05	0.00141471	5.939	0.822384	6.00571	1.90498e-09	2.01477e-07	7.56709	0.841203	7.80679	5.8665e-15	1.95003e-12	5.52518	0.820111	5.51776	3.43345e-08	4.39436e-07	5.21095	1.02953	4.09016	4.31077e-05	0.00103405	activin receptor type-2A precursor [Source:RefSeq peptide;Acc:NP_001191694]
ENSSSCG00000000232	ACVRL1	Myeloid	1903.93	7.18157	1.90476	3.24533	0.00117314	0.00912317	11.3558	1.9521	5.30499	1.1268e-07	1.43113e-06	9.49756	1.91591	4.43526	9.19633e-06	8.1922e-05	13.8661	2.17177	5.92425	3.13717e-09	4.44013e-08	9.92017	1.92064	4.64437	3.41118e-06	3.3575e-05	12.3658	2.00161	5.67834	1.3601e-08	1.84422e-07	13.6661	2.79206	4.53647	5.72042e-06	7.04248e-05	activin A receptor like type 1 [Source:HGNC Symbol;Acc:HGNC:175]
ENSSSCG00000035218	ADA2	Myeloid	2454.07	3.13575	0.556399	3.83852	0.000123778	0.00119208	2.99854	0.556348	3.59226	0.000327826	0.00244813	7.83109	0.570105	11.9822	4.40694e-33	4.16832e-31	8.85221	0.584368	13.4371	3.66549e-41	5.39801e-39	8.42699	0.577241	12.8664	6.9602e-38	9.09831e-36	8.73429	0.582188	13.2849	2.83313e-40	4.45414e-38	7.44733	0.71858	8.97233	2.903e-19	2.04688e-17	adenosine deaminase 2 precursor [Source:RefSeq peptide;Acc:NP_999181]
ENSSSCG00000009644	ADAM28	Myeloid	391.333	4.58237	0.490496	7.30355	2.80267e-13	9.56195e-12	7.21586	0.53995	11.5119	1.14886e-30	1.37792e-28	5.54054	0.499829	9.08418	1.04481e-19	3.90846e-18	4.17887	0.488051	6.51339	7.34722e-11	1.27388e-09	7.21722	0.540003	11.5133	1.13056e-30	9.19788e-29	6.73835	0.523873	10.9537	6.37926e-28	4.28996e-26	7.73098	0.745134	9.03325	1.66653e-19	1.20425e-17	ADAM metallopeptidase domain 28 [Source:HGNC Symbol;Acc:HGNC:206]
ENSSSCG00000024043	ADAMTS2	Myeloid	62.6667	6.45645	1.05709	5.16176	2.44633e-07	3.94191e-06	7.00219	1.10282	5.44258	5.25142e-08	6.95843e-07	6.27927	1.04527	5.05065	4.40319e-07	4.83271e-06	7.2153	1.1252	5.52373	3.3187e-08	4.17418e-07	7.6462	1.17996	5.63255	1.77568e-08	2.39934e-07	3.75617	0.966952	2.85037	0.00436689	0.0250268	10.989	2.36761	4.21904	2.45345e-05	0.000261387	ADAM metallopeptidase with thrombospondin type 1 motif 2 [Source:HGNC Symbol;Acc:HGNC:218]
ENSSSCG00000006651	ADAMTSL4	Myeloid	349.333	3.76867	0.650722	4.25477	2.09264e-05	0.000237057	6.13689	0.669992	7.66709	1.75942e-14	5.20842e-13	6.78585	0.683241	8.46824	2.49134e-17	7.62744e-16	6.53536	0.677444	8.17095	3.05973e-16	9.03474e-15	6.29755	0.672761	7.87434	3.42555e-15	9.72019e-14	7.31679	0.699168	9.03473	1.64415e-19	5.90372e-18	7.87011	0.931765	7.37322	1.6655e-13	5.81874e-12	ADAMTS like 4 [Source:HGNC Symbol;Acc:HGNC:19706]
ENSSSCG00000017738	ADAP2	Myeloid	109.733	5.27996	0.952153	4.49503	6.95605e-06	8.61839e-05	7.14632	1.02078	6.0212	1.73125e-09	2.82487e-08	5.17275	0.950213	4.39138	1.12633e-05	9.94969e-05	10.6695	1.65727	5.8346	5.39205e-09	7.33697e-08	6.62013	0.99256	5.66226	1.4939e-08	2.03513e-07	7.42787	1.04015	6.17974	6.42085e-10	1.00404e-08	6.9381	1.27507	4.65709	3.20713e-06	4.15498e-05	arf-GAP with dual PH domain-containing protein 2 [Source:RefSeq peptide;Acc:NP_001182252]
ENSSSCG00000013556	ADGRE1	Myeloid	178	11.3759	1.68847	6.14516	7.98819e-10	1.86991e-08	12.8076	1.7117	6.89819	5.26698e-12	1.21099e-10	9.39272	1.17436	7.14664	8.89273e-13	1.85409e-11	9.31078	1.16184	7.15311	8.48339e-13	1.80102e-11	8.8241	1.09843	7.123	1.05604e-12	2.31811e-11	12.8076	1.7117	6.89819	5.26698e-12	1.02812e-10	5.02695	1.20964	3.32905	0.00087144	0.00672303	adhesion G protein-coupled receptor E1 [Source:HGNC Symbol;Acc:HGNC:3336]
ENSSSCG00000002815	ADGRG1	NK	13252.3	6.02472	0.771874	6.50977	7.52673e-11	1.9686e-08	11.7243	0.788172	13.6066	3.659e-42	4.25688e-39	9.4568	0.775025	10.9117	1.01398e-27	9.07432e-25	3.56447	0.77161	3.32353	0.000888851	0.0305944	6.12051	0.771896	6.63369	3.27407e-11	3.84753e-09	10.568	0.77904	12.2817	1.13544e-34	2.20162e-31	6.20649	0.771917	6.74488	1.53155e-11	4.2729e-10	adhesion G-protein coupled receptor G1 precursor [Source:RefSeq peptide;Acc:NP_001229985]
ENSSSCG00000003761	ADGRL2	Myeloid	217.933	6.41259	0.885086	6.11532	9.63637e-10	2.2156e-08	9.30093	1.06961	7.76074	8.44347e-15	2.59871e-13	7.62021	0.925817	7.15067	8.63563e-13	1.80372e-11	7.90115	0.940799	7.33541	2.21038e-13	5.04226e-12	8.30862	0.967822	7.55161	4.29896e-14	1.0968e-12	8.81084	1.01191	7.71892	1.17321e-14	2.89791e-13	6.74024	1.14124	5.02984	4.90882e-07	7.18354e-06	adhesion G protein-coupled receptor L2 [Source:HGNC Symbol;Acc:HGNC:18582]
ENSSSCG00000040845	AGPAT2	Myeloid	275.467	4.35695	0.551231	6.08991	1.12977e-09	2.57721e-08	6.74821	0.592517	9.70135	2.97539e-22	1.89157e-20	7.85707	0.646362	10.6087	2.71442e-26	1.6112e-24	6.15668	0.575785	8.95592	3.36921e-19	1.26852e-17	8.20816	0.672201	10.7232	7.91894e-27	5.03437e-25	7.65677	0.633811	10.5028	8.38761e-26	4.8548e-24	7.81069	0.874785	7.78556	6.94038e-15	2.84311e-13	1-acyl-sn-glycerol-3-phosphate acyltransferase beta precursor [Source:RefSeq peptide;Acc:NP_001124006]
ENSSSCG00000032341	AIF1	Myeloid	2347.47	3.67303	0.572399	4.66988	3.01374e-06	4.02086e-05	7.8909	0.585409	11.7711	5.50088e-32	7.52908e-30	7.35033	0.58115	10.9272	8.54746e-28	5.74804e-26	8.34547	0.59041	12.4413	1.5594e-35	1.76137e-33	7.11578	0.579736	10.5492	5.12049e-26	3.08662e-24	7.56179	0.582633	11.2623	2.01425e-29	1.46461e-27	6.80788	0.729754	7.95869	1.73873e-15	7.84048e-14	allograft inflammatory factor 1 [Source:RefSeq peptide;Acc:NP_001123422]
ENSSSCG00000003491	AKR7A2	Myeloid	1388.33	3.41323	0.446554	5.40412	6.51266e-08	1.16209e-06	3.40332	0.446541	5.38209	7.36273e-08	9.56306e-07	3.63256	0.446856	5.89129	3.83183e-09	5.46987e-08	2.8653	0.445971	4.18255	2.88253e-05	0.000233859	4.25866	0.44802	7.27347	3.50365e-13	8.13538e-12	4.39575	0.448349	7.57389	3.62224e-14	8.47911e-13	3.6777	0.561313	4.77043	1.83836e-06	2.48114e-05	aflatoxin B1 aldehyde reductase member 2 [Source:RefSeq peptide;Acc:NP_001230751]
ENSSSCG00000010404	ALOX5	Myeloid	147.533	5.2839	1.14846	3.73012	0.000191385	0.00176712	9.06342	1.34644	5.98869	2.11537e-09	3.40861e-08	7.92847	1.23409	5.61422	1.97447e-08	2.60443e-07	10.0778	1.53462	5.91533	3.31216e-09	4.65945e-08	11.0154	1.80662	5.54371	2.96137e-08	3.84945e-07	5.74908	1.15488	4.11217	3.91952e-05	0.000328528	6.58597	1.50414	3.71373	0.000204231	0.00183119	arachidonate 5-lipoxygenase [Source:HGNC Symbol;Acc:HGNC:435]
ENSSSCG00000031538	ANG	Myeloid	285.733	5.78604	0.748065	6.3979	1.57532e-10	4.02798e-09	6.32285	0.756505	7.0361	1.97695e-12	4.74224e-11	7.67929	0.797467	8.37563	5.4927e-17	1.65122e-15	7.37594	0.784963	8.1226	4.56317e-16	1.33387e-14	6.10471	0.752706	6.78182	1.18674e-11	2.3011e-10	7.22408	0.779561	7.98409	1.41563e-15	3.82121e-14	6.30821	0.965568	5.4975	3.85221e-08	6.63951e-07	angiogenin [Source:HGNC Symbol;Acc:HGNC:483]
ENSSSCG00000011296	ANO10	Myeloid	698.867	6.16566	0.595676	8.67193	4.24871e-18	2.57445e-16	5.51579	0.590861	7.64272	2.12676e-14	6.22425e-13	6.88349	0.604114	9.73904	2.05479e-22	9.63928e-21	6.20815	0.596071	8.73747	2.38388e-18	8.35364e-17	5.79449	0.592671	8.08964	5.98432e-16	1.85164e-14	4.65226	0.587014	6.22176	4.91615e-10	7.78156e-09	6.77892	0.770618	7.49907	6.4273e-14	2.34405e-12	anoctamin 10 [Source:HGNC Symbol;Acc:HGNC:25519]
ENSSSCG00000003088	APOE	Myeloid	79.6	7.47281	1.3896	4.65805	3.19222e-06	4.22988e-05	11.6253	1.92184	5.5287	3.22609e-08	4.41259e-07	7.38649	1.38293	4.61809	3.87286e-06	3.64538e-05	7.27496	1.37484	4.56415	5.01531e-06	4.61615e-05	6.29445	1.32407	3.99862	6.37133e-05	0.00051297	7.20507	1.37005	4.52907	5.9245e-06	5.58555e-05	11.7607	2.59592	4.14523	3.39471e-05	0.000352311	apolipoprotein E precursor [Source:RefSeq peptide;Acc:NP_999473]
ENSSSCG00000003486	ARHGEF10L	Myeloid	583	3.53915	0.66675	3.80825	0.000139951	0.00132914	4.95269	0.670775	5.89272	3.79898e-09	5.90085e-08	8.92242	0.756048	10.4787	1.08192e-25	6.20054e-24	9.98781	0.841326	10.6829	1.22382e-26	7.61386e-25	10.1438	0.858616	10.6494	1.75403e-26	1.07971e-24	9.79379	0.821772	10.701	1.0068e-26	6.10057e-25	8.84571	1.0266	7.64241	2.13196e-14	8.10562e-13	Rho guanine nucleotide exchange factor 10 like [Source:HGNC Symbol;Acc:HGNC:25540]
ENSSSCG00000036810	ARL11	Myeloid	108.533	3.91441	0.650709	4.47882	7.50573e-06	9.22087e-05	5.4257	0.680154	6.50691	7.67117e-11	1.47759e-09	6.95432	0.758813	7.84689	4.26487e-15	1.10261e-13	7.74734	0.837976	8.05195	8.14878e-16	2.33505e-14	7.74734	0.837976	8.05195	8.14878e-16	2.46241e-14	6.22779	0.712278	7.33953	2.14348e-13	4.72296e-12	8.33845	1.29863	5.65093	1.59578e-08	2.90083e-07	ADP ribosylation factor like GTPase 11 [Source:HGNC Symbol;Acc:HGNC:24046]
ENSSSCG00000002252	ARRDC4	Myeloid	1053.47	2.95483	0.508651	3.84316	0.000121459	0.00117363	2.63848	0.508292	3.2235	0.00126632	0.00849129	2.71543	0.508372	3.37435	0.000739894	0.00485774	3.25352	0.50907	4.42674	9.56673e-06	8.39362e-05	2.95283	0.508648	3.83925	0.000123408	0.000952709	3.34321	0.509213	4.60164	4.19186e-06	4.04869e-05	3.70101	0.640149	4.21935	2.45012e-05	0.000261387	arrestin domain containing 4 [Source:HGNC Symbol;Acc:HGNC:28087]
ENSSSCG00000006995	ASAH1	Myeloid	2075.6	5.4453	0.431778	10.2953	7.39674e-25	7.96793e-23	5.39053	0.431625	10.1721	2.64132e-24	2.07629e-22	4.96028	0.430603	9.19705	3.67898e-20	1.41726e-18	4.86221	0.430409	8.97334	2.87655e-19	1.09009e-17	4.0935	0.42927	7.20641	5.74462e-13	1.29021e-11	4.56277	0.429893	8.28757	1.15581e-16	3.3533e-15	5.40722	0.543026	8.11604	4.81625e-16	2.42564e-14	N-acylsphingosine amidohydrolase 1 [Source:HGNC Symbol;Acc:HGNC:735]
ENSSSCG00000028108	ASAP3	Myeloid	236.333	6.58877	0.623604	8.96204	3.18728e-19	2.22041e-17	5.4859	0.593742	7.5553	4.17886e-14	1.18868e-12	7.05817	0.643622	9.41262	4.83941e-21	2.01078e-19	6.99962	0.640819	9.36242	7.7929e-21	3.32097e-19	6.8755	0.635179	9.25015	2.24176e-20	9.84175e-19	4.82084	0.58349	6.54824	5.82188e-11	1.00492e-09	5.35801	0.774267	5.62856	1.81718e-08	3.28789e-07	ArfGAP with SH3 domain, ankyrin repeat and PH domain 3 [Source:HGNC Symbol;Acc:HGNC:14987]
ENSSSCG00000006346	ATF6	Myeloid	2209.07	2.28701	0.299707	4.29423	1.75297e-05	0.000200729	1.9338	0.299493	3.11794	0.00182117	0.0117774	5.24838	0.306323	13.869	9.76902e-44	1.77583e-41	3.19322	0.300569	7.29691	2.9446e-13	6.56273e-12	3.69046	0.301327	8.92871	4.31015e-19	1.70559e-17	3.97952	0.301902	9.86917	5.66303e-23	2.72247e-21	2.03508	0.375721	2.75491	0.0058709	0.0372015	activating transcription factor 6 [Source:HGNC Symbol;Acc:HGNC:791]
ENSSSCG00000006296	ATP1B1	Myeloid	329	5.47923	0.747875	5.98927	2.10787e-09	4.66216e-08	8.48737	0.838647	8.92792	4.34112e-19	2.06141e-17	6.61008	0.764114	7.34194	2.10523e-13	4.62118e-12	9.31737	0.910806	9.13187	6.73239e-20	2.70085e-18	5.3261	0.746481	5.79533	6.81867e-09	9.67419e-08	9.86784	0.981251	9.03729	1.60611e-19	5.78496e-18	13.9134	2.24101	5.76233	8.29611e-09	1.56176e-07	Sodium/potassium-transporting ATPase subunit beta-1 [Source:UniProtKB/Swiss-Prot;Acc:P05027]
ENSSSCG00000017401	ATP6V0A1	Myeloid	400.667	2.75098	0.379504	4.61387	3.9523e-06	5.17805e-05	2.59224	0.37897	4.20149	2.65166e-05	0.000234953	2.88956	0.380019	4.97226	6.61753e-07	7.0957e-06	3.98552	0.386362	7.72727	1.09877e-14	2.80331e-13	3.43783	0.382611	6.37158	1.87094e-10	3.1869e-09	4.56351	0.392139	9.08738	1.01456e-19	3.72346e-18	5.32558	0.512161	8.44574	3.02121e-17	1.76627e-15	ATPase H+ transporting V0 subunit a1 [Source:HGNC Symbol;Acc:HGNC:865]
ENSSSCG00000033015	B3GNT7	NK	131.733	5.5342	0.980405	4.62482	3.74916e-06	0.000212769	6.34875	0.991281	5.39579	6.82215e-08	2.39063e-06	6.24471	0.989537	5.30017	1.15696e-07	5.80177e-06	5.22228	0.977595	4.31905	1.56702e-05	0.00106612	6.8583	1.00183	5.84762	4.98644e-09	4.0568e-07	7.0316	1.00631	5.99377	2.05029e-09	1.42832e-07	7.19695	1.0111	6.12894	8.8467e-10	1.96043e-08	UDP-GlcNAc:betaGal beta-1,3-N-acetylglucosaminyltransferase 7 [Source:HGNC Symbol;Acc:HGNC:18811]
ENSSSCG00000000623	BCL2L14	Myeloid	176.467	4.36419	0.631065	5.33097	9.7688e-08	1.69627e-06	6.12228	0.667853	7.66977	1.72304e-14	5.11373e-13	4.09157	0.628322	4.92037	8.63813e-07	9.08644e-06	4.09988	0.628398	4.93298	8.09825e-07	8.33024e-06	5.6364	0.653173	7.09827	1.26328e-12	2.73687e-11	4.97256	0.63935	6.21344	5.18386e-10	8.17195e-09	7.97179	1.05731	6.59388	4.2847e-11	1.13034e-09	apoptosis facilitator Bcl-2-like protein 14 [Source:RefSeq peptide;Acc:NP_001302597]
ENSSSCG00000027568	BLK	SWC6gdT	8500.93	2.40591	0.455484	3.08663	0.0020244	0.0295878	3.26986	0.45559	4.98226	6.28469e-07	1.05355e-05	6.66059	0.457815	12.3644	4.07448e-35	5.26694e-32	5.72218	0.45664	10.3411	4.59026e-25	3.33769e-22	8.58979	0.464657	16.3342	5.63972e-60	2.18708e-56	8.5526	0.464423	16.2623	1.82628e-59	7.86923e-57	3.88901	0.571746	5.05296	4.35016e-07	1.69264e-05	BLK proto-oncogene, Src family tyrosine kinase [Source:HGNC Symbol;Acc:HGNC:1057]
ENSSSCG00000016756	BLVRA	Myeloid	477.667	3.02441	0.388592	5.20959	1.89253e-07	3.12752e-06	8.04931	0.527803	13.356	1.09351e-40	2.6504e-38	2.83499	0.387949	4.72998	2.24542e-06	2.20263e-05	2.38481	0.386717	3.58093	0.000342369	0.00234854	3.38575	0.390075	6.11611	9.58857e-10	1.50375e-08	3.14055	0.38903	5.50229	3.74894e-08	4.75111e-07	3.27087	0.492602	4.60995	4.0277e-06	5.13797e-05	biliverdin reductase A [Source:HGNC Symbol;Acc:HGNC:1062]
ENSSSCG00000012137	BMX	Myeloid	334.4	6.04541	0.652363	7.73405	1.04176e-14	4.26754e-13	4.39121	0.635716	5.33446	9.58276e-08	1.22647e-06	5.73709	0.647712	7.31357	2.6013e-13	5.67796e-12	6.3223	0.657439	8.09551	5.70268e-16	1.65449e-14	5.30545	0.642626	6.69977	2.08742e-11	3.90435e-10	5.52658	0.645047	7.01745	2.25957e-12	4.54808e-11	6.30225	0.832921	6.36585	1.94211e-10	4.77686e-09	BMX non-receptor tyrosine kinase [Source:HGNC Symbol;Acc:HGNC:1079]
ENSSSCG00000013632	C19orf38	Myeloid	790.333	4.91827	0.544111	7.20123	5.96723e-13	1.98919e-11	9.77109	0.671189	13.068	5.0174e-39	1.14456e-36	8.56629	0.599936	12.6118	1.81693e-36	2.13517e-34	9.5625	0.65495	13.0735	4.66578e-39	6.16837e-37	8.38747	0.593154	12.4545	1.32096e-35	1.3971e-33	9.22381	0.63245	13.0031	1.1748e-38	1.55313e-36	9.87676	0.901229	9.84961	6.88099e-23	7.08437e-21	chromosome 19 open reading frame 38 [Source:HGNC Symbol;Acc:HGNC:34073]
ENSSSCG00000033913	C1RL	Myeloid	86.9333	3.5164	0.636418	3.95401	7.6853e-05	0.00077345	4.90441	0.665892	5.86343	4.53391e-09	6.96796e-08	4.52761	0.655091	5.38491	7.2482e-08	8.82991e-07	4.70051	0.659722	5.60919	2.0327e-08	2.61021e-07	6.79744	0.781866	7.41488	1.21736e-13	2.96913e-12	4.6091	0.657209	5.49156	3.98394e-08	5.01615e-07	7.55382	1.13988	5.74956	8.9476e-09	1.67627e-07	complement C1r subcomponent like [Source:HGNC Symbol;Acc:HGNC:21265]
ENSSSCG00000001422	C2	Myeloid	1262.47	9.51357	1.84593	4.61209	3.98642e-06	5.21101e-05	11.5575	1.91567	5.51113	3.56527e-08	4.8456e-07	9.50373	1.84577	4.60715	4.08229e-06	3.82394e-05	15.6569	2.32445	6.30554	2.87186e-10	4.61481e-09	10.7184	1.87562	5.18143	2.20191e-07	2.55914e-06	9.88164	1.85261	4.79411	1.63396e-06	1.66313e-05	15.0934	3.06953	4.59139	4.40298e-06	5.56181e-05	complement C2 precursor [Source:RefSeq peptide;Acc:NP_001095285]
ENSSSCG00000029371	C5AR1	Myeloid	1992.2	11.6233	0.961669	11.0468	2.27255e-28	3.14748e-26	11.5797	0.958373	11.0392	2.47153e-28	2.5673e-26	9.91773	0.881161	10.1204	4.48418e-24	2.28811e-22	14.9	1.59434	8.71832	2.82369e-18	9.83556e-17	9.74711	0.876956	9.9744	1.97287e-23	1.01559e-21	10.6731	0.906566	10.6701	1.40544e-26	8.47196e-25	11.57	1.28764	8.20882	2.23376e-16	1.18125e-14	C5a anaphylatoxin chemotactic receptor 1 [Source:RefSeq peptide;Acc:NP_001231144]
ENSSSCG00000011010	C9orf72	Myeloid	911	2.87651	0.39828	4.71153	2.45864e-06	3.3299e-05	3.01158	0.398512	5.04771	4.47139e-07	5.28123e-06	3.20381	0.398882	5.52497	3.29537e-08	4.22996e-07	3.8039	0.400408	7.00261	2.51246e-12	5.06585e-11	3.36527	0.399233	5.92454	3.13175e-09	4.62371e-08	3.48815	0.399528	6.22773	4.73247e-10	7.50103e-09	3.1753	0.500944	4.34241	1.40931e-05	0.000157652	chromosome 9 open reading frame 72 [Source:HGNC Symbol;Acc:HGNC:28337]
ENSSSCG00000006143	CA13	Myeloid	104.867	4.5825	0.732626	4.88994	1.00866e-06	1.46137e-05	4.60494	0.733073	4.91757	8.76239e-07	9.88765e-06	4.31858	0.727834	4.55953	5.12672e-06	4.72242e-05	4.14503	0.725114	4.33729	1.4425e-05	0.000122945	4.18425	0.725701	4.38782	1.14491e-05	0.000103255	4.75393	0.736221	5.09891	3.41611e-07	3.78145e-06	4.81324	0.933643	4.08426	4.42183e-05	0.000449289	carbonic anhydrase 13 [Source:HGNC Symbol;Acc:HGNC:14914]
ENSSSCG00000017873	CAMKK1	Myeloid	221.867	4.69838	0.478361	7.73137	1.06397e-14	4.32805e-13	5.87932	0.511137	9.54602	1.34775e-21	7.95924e-20	3.62919	0.464075	5.66544	1.46649e-08	1.96019e-07	3.38155	0.461982	5.15507	2.53533e-07	2.79054e-06	2.36357	0.45627	2.98851	0.00280345	0.0168816	5.7845	0.507522	9.42718	4.21279e-21	1.76301e-19	2.7564	0.580655	3.02486	0.00248746	0.0173808	calcium/calmodulin dependent protein kinase kinase 1 [Source:HGNC Symbol;Acc:HGNC:1469]
ENSSSCG00000004728	CAPN3	Myeloid	776.333	13.242	3.18208	3.84717	0.000119492	0.00115655	10.7174	3.00311	3.23579	0.00121306	0.00820033	10.3398	2.99181	3.12179	0.00179753	0.0109661	15.1687	3.28675	4.31084	1.62632e-05	0.000137106	12.8025	3.15186	3.74462	0.00018067	0.00135258	11.3962	3.03206	3.42876	0.000606356	0.00412053	14.3478	4.23948	3.14846	0.00164132	0.0119643	calpain 3 [Source:HGNC Symbol;Acc:HGNC:1480]
ENSSSCG00000007495	CASS4	SWC6gdT	1913.8	2.14626	0.35868	3.19576	0.00139462	0.021405	3.40787	0.35989	6.69056	2.2232e-11	7.10568e-10	2.31082	0.358785	3.6535	0.000258692	0.00887796	2.85	0.359225	5.14997	2.60534e-07	1.72219e-05	2.37384	0.358828	3.82868	0.000128835	0.00399698	3.81923	0.360573	7.81875	5.33512e-15	1.3732e-13	5.90479	0.466104	10.523	6.77109e-26	4.63381e-23	cas scaffolding protein family member 4 [Source:RefSeq peptide;Acc:NP_001103901]
ENSSSCG00000009842	CCDC60	Myeloid	27.2667	4.96841	1.23196	3.22123	0.00127641	0.00981478	6.51315	1.36305	4.04472	5.23852e-05	0.000446157	5.98526	1.30395	3.8232	0.00013173	0.000995162	5.49483	1.26357	3.55724	0.000374766	0.00254972	5.49483	1.26357	3.55724	0.000374766	0.00264321	4.15102	1.19981	2.62625	0.00863303	0.0466713	7.1112	2.05158	2.97877	0.00289407	0.0198523	coiled-coil domain containing 60 [Source:HGNC Symbol;Acc:HGNC:28610]
ENSSSCG00000038162	CCL21	Myeloid	84.5333	8.11554	1.26954	5.60482	2.08477e-08	4.0832e-07	5.76874	1.09655	4.34887	1.36841e-05	0.000127157	4.43487	1.06738	3.21804	0.00129069	0.0080948	5.22483	1.08153	3.90636	9.3696e-05	0.000708291	5.53655	1.08948	4.16396	3.12776e-05	0.000263684	5.2335	1.08173	3.91366	9.09091e-05	0.000716556	5.02571	1.34937	2.9834	0.00285064	0.0196123	C-C motif chemokine 21 precursor [Source:RefSeq peptide;Acc:NP_001005151]
ENSSSCG00000004610	CCPG1	Myeloid	4015	3.09525	0.217024	9.65448	4.70534e-22	4.24356e-20	2.97825	0.216911	9.12009	7.50621e-20	3.84701e-18	2.66506	0.21665	7.68548	1.52429e-14	3.72555e-13	2.40763	0.216474	6.50253	7.89817e-11	1.36331e-09	2.24615	0.216379	5.75911	8.45587e-09	1.18955e-07	2.44177	0.216496	6.65959	2.74595e-11	4.90728e-10	2.29357	0.27144	4.76559	1.88305e-06	2.5268e-05	cell cycle progression protein 1 [Source:RefSeq peptide;Acc:NP_001230230]
ENSSSCG00000011322	CCR1	Myeloid	810.8	5.03141	0.733594	5.49543	3.89766e-08	7.24366e-07	3.77603	0.731044	3.79735	0.000146251	0.00117021	8.28571	0.770043	9.46144	3.0373e-21	1.27567e-19	12.3524	1.24563	9.11379	7.9551e-20	3.16951e-18	6.4088	0.740556	7.3037	2.79957e-13	6.61995e-12	6.83548	0.744422	7.83895	4.54341e-15	1.17987e-13	7.715	0.957751	7.01122	2.36254e-12	7.31006e-11	C-C chemokine receptor type 1 [Source:RefSeq peptide;Acc:NP_001001621]
ENSSSCG00000024311	CCR2	Myeloid	5666.27	4.5244	0.711084	4.95638	7.18195e-07	1.06711e-05	7.58256	0.715236	9.20334	3.47002e-20	1.82671e-18	4.60647	0.711117	5.07156	3.94576e-07	4.35531e-06	4.10618	0.710941	4.36911	1.24754e-05	0.000108071	2.8636	0.710695	2.62222	0.00873598	0.0476933	4.30916	0.711005	4.65421	3.25232e-06	3.18498e-05	7.62322	0.896842	7.38505	1.524e-13	5.34044e-12	C-C chemokine receptor type 2 [Source:RefSeq peptide;Acc:NP_001001619]
ENSSSCG00000022986	CCSER1	Myeloid	69.8	5.91036	1.09309	4.4922	7.04897e-06	8.70571e-05	10.2303	1.69122	5.45777	4.82142e-08	6.43262e-07	8.42194	1.306	5.68297	1.32372e-08	1.78243e-07	11.6046	1.77821	5.96367	2.46636e-09	3.54242e-08	7.30703	1.17287	5.37743	7.55559e-08	9.36121e-07	7.07758	1.15465	5.26355	1.41303e-07	1.65551e-06	12.1101	2.43242	4.56752	4.93526e-06	6.16722e-05	coiled-coil serine rich protein 1 [Source:HGNC Symbol;Acc:HGNC:29349]
ENSSSCG00000014369	CD14	Myeloid	658.533	9.63879	0.637633	13.5482	8.11894e-42	2.95174e-39	7.70077	0.527809	12.6954	6.26795e-37	1.17615e-34	8.70189	0.56908	13.5339	9.86137e-42	1.57161e-39	7.20476	0.515201	12.0434	2.10186e-33	2.02091e-31	6.97753	0.510648	11.7058	1.19078e-31	1.02618e-29	8.26937	0.548104	13.2628	3.80618e-40	5.82647e-38	9.91976	0.888799	10.0357	1.06155e-23	1.22278e-21	monocyte differentiation antigen CD14 precursor [Source:RefSeq peptide;Acc:NP_001090914]
ENSSSCG00000033146	CD163	Myeloid	2548	13.8743	1.17497	10.9571	6.1406e-28	8.02694e-26	12.7152	0.994335	11.782	4.83493e-32	6.77706e-30	10.2943	0.849628	10.9392	7.484e-28	5.1217e-26	13.9763	1.1967	10.8434	2.14281e-27	1.38497e-25	10.7302	0.862597	11.2801	1.6449e-29	1.24265e-27	12.0981	0.935972	11.8573	1.97129e-32	1.83472e-30	10.1936	1.10622	8.31083	9.50335e-17	5.23991e-15	scavenger receptor cysteine-rich type 1 protein M130 precursor [Source:RefSeq peptide;Acc:NP_999141]
ENSSSCG00000017236	CD300C	Myeloid	948.8	4.48807	1.00137	3.48331	0.000495261	0.00422424	5.7194	1.00403	4.70043	2.59608e-06	2.72098e-05	8.73786	1.03435	7.48091	7.38114e-14	1.68047e-12	9.23075	1.04701	7.86123	3.80388e-15	1.01968e-13	8.57668	1.03093	7.34938	1.99132e-13	4.75708e-12	10.6328	1.10734	8.69905	3.3468e-18	1.08762e-16	7.75709	1.2631	5.34962	8.81383e-08	1.44017e-06	CMRF35-like molecule 6 precursor [Source:RefSeq peptide;Acc:NP_001231232]
ENSSSCG00000017956	CD68	Myeloid	318.8	3.64816	0.490981	5.39361	6.90565e-08	1.2247e-06	5.36	0.505242	8.62952	6.16078e-18	2.5969e-16	7.27488	0.556792	11.2697	1.85196e-29	1.35507e-27	7.85122	0.587892	11.6539	2.19244e-31	1.8894e-29	8.11599	0.605943	11.7437	7.61172e-32	6.7087e-30	6.8766	0.540643	10.8697	1.60797e-27	1.05096e-25	7.76179	0.820143	8.24464	1.65654e-16	8.9638e-15	macrosialin precursor [Source:RefSeq peptide;Acc:NP_001278705]
ENSSSCG00000022230	CD9	Myeloid	2640.47	2.00757	0.260051	3.8745	0.000106842	0.00104184	3.7957	0.261654	10.6847	1.20012e-26	1.1539e-24	4.1189	0.262218	11.8943	1.26665e-32	1.16034e-30	5.83946	0.268576	18.019	1.38311e-72	8.04553e-70	2.57031	0.260363	6.03123	1.6272e-09	2.50407e-08	5.01223	0.264612	15.1627	6.24676e-52	1.86346e-49	7.71649	0.382013	17.5818	3.39337e-69	5.63979e-66	CD9 antigen [Source:RefSeq peptide;Acc:NP_999171]
ENSSSCG00000021259	CDA	Myeloid	152	5.13377	1.38856	2.97702	0.00291065	0.0204237	6.99685	1.41839	4.22794	2.35844e-05	0.000209932	10.1737	1.65434	5.54526	2.9351e-08	3.78569e-07	13.0161	1.99404	6.026	1.68068e-09	2.4782e-08	7.66944	1.44106	4.62814	3.68963e-06	3.60413e-05	13.0161	1.99404	6.026	1.68068e-09	2.53606e-08	11.7561	2.68393	4.0076	6.13393e-05	0.000612025	cytidine deaminase [Source:RefSeq peptide;Acc:NP_001231314]
ENSSSCG00000017245	CDC42EP4	Myeloid	129	3.68403	0.928389	2.89106	0.00383943	0.0262136	8.46875	1.12364	6.64692	2.99296e-11	6.04516e-10	7.98667	1.0698	6.53081	6.54139e-11	1.15132e-09	12.2352	1.71119	6.56571	5.17857e-11	9.10082e-10	9.79251	1.37386	6.39983	1.55546e-10	2.68091e-09	12.2352	1.71119	6.56571	5.17857e-11	9.02643e-10	6.62606	1.27114	4.426	9.59963e-06	0.000111682	CDC42 effector protein 4 [Source:HGNC Symbol;Acc:HGNC:17147]
ENSSSCG00000009231	CDS1	Myeloid	67.5333	7.94607	1.31456	5.28394	1.26434e-07	2.15995e-06	11.7016	1.82978	5.84857	4.95816e-09	7.59991e-08	4.95081	1.15614	3.41724	0.000632604	0.00420315	7.6583	1.28677	5.17444	2.28591e-07	2.5352e-06	5.37489	1.16591	3.75234	0.00017519	0.00131325	4.88481	1.15484	3.36394	0.000768381	0.00512871	10.4671	2.48779	3.80543	0.00014156	0.00130087	phosphatidate cytidylyltransferase 1 [Source:RefSeq peptide;Acc:NP_001037999]
ENSSSCG00000002866	CEBPA	Myeloid	164.133	5.4332	0.704117	6.29612	3.05189e-10	7.57052e-09	11.2061	1.56036	6.54085	6.11692e-11	1.19004e-09	8.39535	0.867989	8.52009	1.59432e-17	4.97273e-16	8.41289	0.870066	8.51992	1.59667e-17	5.33782e-16	6.72115	0.742014	7.71029	1.25533e-14	3.3885e-13	8.68291	0.904688	8.49233	2.02528e-17	6.18427e-16	12.5121	2.2152	5.19687	2.02671e-07	3.13965e-06	CCAAT/enhancer binding protein alpha [Source:HGNC Symbol;Acc:HGNC:1833]
ENSSSCG00000032367	CEBPD	Myeloid	1017.8	6.01553	0.641928	7.81323	5.5742e-15	2.393e-13	7.01871	0.650324	9.25494	2.14354e-20	1.15991e-18	4.14375	0.635763	4.94485	7.62036e-07	8.09637e-06	3.56854	0.634995	4.04497	5.23294e-05	0.000413868	4.57281	0.63657	5.6126	1.99312e-08	2.6745e-07	4.84603	0.637224	6.03561	1.58366e-09	2.40526e-08	6.05564	0.811615	6.22911	4.69086e-10	1.09147e-08	CCAAT/enhancer binding protein delta [Source:HGNC Symbol;Acc:HGNC:1835]
ENSSSCG00000012278	CFP	Myeloid	1185.8	5.29955	0.517711	8.30492	9.98871e-17	5.07461e-15	9.30952	0.582858	14.2565	4.08423e-46	1.3576e-43	8.06909	0.543806	12.9993	1.23491e-38	1.65138e-36	7.24771	0.53071	11.7724	5.41803e-32	4.88631e-30	7.72512	0.53745	12.513	6.33709e-36	6.89025e-34	8.72621	0.560697	13.7797	3.37829e-43	6.14109e-41	5.95059	0.659233	7.50961	5.93017e-14	2.16955e-12	complement factor properdin [Source:HGNC Symbol;Acc:HGNC:8864]
ENSSSCG00000015476	CHI3L1	Myeloid	856.133	5.3094	0.787315	5.47353	4.41146e-08	8.13359e-07	10.7596	0.945103	10.3265	5.34511e-25	4.3486e-23	9.68225	0.864808	10.0395	1.02182e-23	5.10206e-22	15.1064	1.64152	8.59349	8.4368e-18	2.86163e-16	8.79794	0.828753	9.40925	4.99683e-21	2.27973e-19	10.5685	0.926917	10.3229	5.5526e-25	3.03281e-23	14.6726	2.26897	6.02587	1.68199e-09	3.57738e-08	chitinase-3-like protein 1 precursor [Source:RefSeq peptide;Acc:NP_001001540]
ENSSSCG00000006796	CHI3L2	Myeloid	159.267	5.36737	0.476041	9.17437	4.54222e-20	3.4093e-18	3.5992	0.439458	5.91456	3.32764e-09	5.23866e-08	3.90989	0.443252	6.56486	5.20809e-11	9.23641e-10	4.09035	0.445841	6.93151	4.16378e-12	8.28058e-11	4.821	0.460084	8.305	9.98213e-17	3.35642e-15	4.56105	0.45423	7.83976	4.51417e-15	1.1749e-13	6.89349	0.762427	7.72991	1.07626e-14	4.2589e-13	chitinase 3 like 2 [Source:HGNC Symbol;Acc:HGNC:1933]
ENSSSCG00000000864	CHPT1	Myeloid	1530.53	8.89169	0.881624	8.9513	3.51311e-19	2.43283e-17	11.7703	1.02332	10.5249	6.6362e-26	5.8489e-24	9.46584	0.893458	9.47536	2.65838e-21	1.12217e-19	13.4437	1.3117	9.48667	2.38537e-21	1.04722e-19	9.46633	0.89347	9.47579	2.64761e-21	1.22718e-19	8.92567	0.882206	8.98392	2.61281e-19	9.12837e-18	11.6207	1.36538	7.77856	7.33574e-15	2.98405e-13	choline phosphotransferase 1 [Source:HGNC Symbol;Acc:HGNC:17852]
ENSSSCG00000029482	CHST15	Myeloid	991.4	4.93513	0.450363	8.73768	2.37947e-18	1.48036e-16	3.08442	0.445997	4.67361	2.95945e-06	3.07139e-05	6.09448	0.457719	11.1301	8.94886e-29	6.34823e-27	6.77545	0.465619	12.4038	2.49188e-35	2.7094e-33	4.8234	0.449915	8.49806	1.92787e-17	6.69518e-16	5.71631	0.454662	10.3732	3.28273e-25	1.81863e-23	3.75987	0.562201	4.90905	9.15206e-07	1.29061e-05	carbohydrate sulfotransferase 15 [Source:HGNC Symbol;Acc:HGNC:18137]
ENSSSCG00000001989	CIDEB	Myeloid	179.933	5.91201	1.27951	3.83898	0.000123548	0.00119085	12.7843	1.91577	6.15121	7.68944e-10	1.31364e-08	7.1271	1.30423	4.69786	2.62896e-06	2.54242e-05	7.82734	1.33083	5.13015	2.89517e-07	3.15385e-06	6.09915	1.28212	3.97711	6.97578e-05	0.000559698	10.371	1.62814	5.75563	8.63168e-09	1.19834e-07	9.40904	1.89054	4.44796	8.66894e-06	0.000101976	cell death activator CIDE-B [Source:RefSeq peptide;Acc:NP_001106158]
ENSSSCG00000000648	CLEC7A	Myeloid	138.6	3.97007	0.877508	3.38467	0.000712644	0.00584278	12.3587	1.68343	6.74736	1.5056e-11	3.19638e-10	8.77705	1.10713	7.02451	2.14824e-12	4.33148e-11	12.3587	1.68343	6.74736	1.5056e-11	2.79811e-10	9.93936	1.3407	6.66766	2.59922e-11	4.80753e-10	9.837	1.31415	6.72452	1.76169e-11	3.23784e-10	9.53789	1.8239	4.68111	2.8533e-06	3.734e-05	C-type lectin domain family 7 member A [Source:RefSeq peptide;Acc:NP_001139338]
ENSSSCG00000039998	CLIC2	Myeloid	468.533	3.24833	0.399309	5.63054	1.79643e-08	3.5787e-07	4.43047	0.404842	8.4736	2.37913e-17	9.41458e-16	5.07624	0.410351	9.93355	2.97471e-23	1.44802e-21	6.2734	0.429508	12.2778	1.1923e-34	1.23851e-32	5.83778	0.420762	11.4977	1.3552e-30	1.08734e-28	5.2499	0.412286	10.3081	6.47402e-25	3.47091e-23	5.49382	0.529747	8.48295	2.19554e-17	1.30321e-15	chloride intracellular channel protein 2 [Source:RefSeq peptide;Acc:NP_001231357]
ENSSSCG00000031346	CMKLR1	Myeloid	319.133	7.43392	0.564053	11.4066	3.87568e-30	6.53473e-28	10.2305	0.873546	10.5667	4.25063e-26	3.86343e-24	8.11293	0.603101	11.7939	4.19527e-32	3.66975e-30	13.6476	1.52394	8.29923	1.04788e-16	3.21664e-15	9.95158	0.819896	10.918	9.46067e-28	6.25372e-26	13.6476	1.52394	8.29923	1.04788e-16	3.0554e-15	9.27551	1.04958	7.88459	3.15575e-15	1.35978e-13	Chemokine-like receptor 1 [Source:UniProtKB/Swiss-Prot;Acc:B1PHQ8]
ENSSSCG00000005997	COL14A1	Myeloid	239.4	4.0481	0.501161	6.08209	1.18629e-09	2.70083e-08	5.67159	0.525313	8.89296	5.95043e-19	2.75806e-17	6.14571	0.538655	9.55288	1.26142e-21	5.47589e-20	4.91772	0.510923	7.66793	1.74791e-14	4.40155e-13	6.16483	0.539281	9.57725	9.96592e-22	4.71315e-20	4.51275	0.505674	6.94667	3.74017e-12	7.38763e-11	5.94325	0.671358	7.36306	1.79741e-13	6.26081e-12	collagen type XIV alpha 1 chain [Source:HGNC Symbol;Acc:HGNC:2191]
ENSSSCG00000038089	COL18A1	Myeloid	871.533	4.20913	0.383781	8.3619	6.1717e-17	3.24894e-15	4.68845	0.385544	9.56688	1.10178e-21	6.60727e-20	5.13884	0.387817	10.6721	1.37425e-26	8.37067e-25	6.68381	0.403689	14.0797	5.06485e-45	9.0653e-43	6.97991	0.409043	14.6193	2.11664e-48	4.56019e-46	5.48067	0.39007	11.4869	1.53606e-30	1.24458e-28	6.12568	0.505279	10.1442	3.51506e-24	4.13073e-22	collagen type XVIII alpha 1 chain [Source:HGNC Symbol;Acc:HGNC:2195]
ENSSSCG00000014081	COL4A3BP	Myeloid	733.133	3.01528	0.408486	4.93354	8.07533e-07	1.19375e-05	2.66619	0.407698	4.08683	4.37316e-05	0.000375479	2.77131	0.407916	4.34235	1.40964e-05	0.000122753	4.07621	0.412448	7.45842	8.75675e-14	2.07065e-12	2.60175	0.407572	3.92998	8.49536e-05	0.000671434	2.12092	0.40679	2.75552	0.00585986	0.0329182	2.72704	0.51235	3.37083	0.000749423	0.00586728	collagen type IV alpha 3 binding protein [Source:HGNC Symbol;Acc:HGNC:2205]
ENSSSCG00000015509	COP1	Myeloid	1287.53	2.5175	0.299608	5.06494	4.08522e-07	6.36244e-06	2.21243	0.299151	4.0529	5.0586e-05	0.000431464	2.41453	0.299443	4.72387	2.314e-06	2.26038e-05	2.3553	0.299353	4.52743	5.97061e-06	5.41404e-05	2.33528	0.299323	4.46101	8.15731e-06	7.5379e-05	1.95638	0.298834	3.20036	0.00137255	0.0087163	2.35068	0.376339	3.58898	0.000331972	0.00284191	COP1, E3 ubiquitin ligase [Source:HGNC Symbol;Acc:HGNC:17440]
ENSSSCG00000012920	CORO1B	Myeloid	1171.4	2.71146	0.424715	4.02968	5.58535e-05	0.000577087	4.29227	0.427614	7.69917	1.36951e-14	4.13841e-13	3.59028	0.425939	6.08135	1.19176e-09	1.82915e-08	3.3527	0.425532	5.52885	3.22339e-08	4.06293e-07	4.05539	0.426956	7.15622	8.2933e-13	1.83779e-11	3.14606	0.425228	5.04685	4.49161e-07	4.92511e-06	3.90433	0.535731	5.42124	5.91876e-08	9.9651e-07	coronin 1B [Source:HGNC Symbol;Acc:HGNC:2253]
ENSSSCG00000028674	CR2	CD21pB	851.133	5.39787	0.517373	8.50038	1.88965e-17	8.1423e-15	8.35956	0.56204	13.0944	3.54627e-39	1.03143e-36	8.96682	0.587219	13.567	6.28102e-42	2.43578e-39	11.2757	0.823256	12.4818	9.38251e-36	1.882e-33	9.60185	0.625611	13.7495	5.12709e-43	1.98829e-40	9.7824	0.639391	13.7356	6.21567e-43	1.76374e-40	5.62363	0.661301	6.99172	2.71545e-12	1.92632e-10	complement C3d receptor 2 [Source:HGNC Symbol;Acc:HGNC:2336]
ENSSSCG00000014093	CRHBP	Myeloid	193.933	3.82995	0.739679	3.82592	0.000130287	0.00124754	3.29922	0.737111	3.11923	0.00181324	0.0117326	6.08091	0.7702	6.59688	4.19914e-11	7.52739e-10	7.68208	0.842927	7.92724	2.24068e-15	6.10495e-14	5.51813	0.7579	5.96138	2.50119e-09	3.74021e-08	6.75121	0.792137	7.26037	3.86023e-13	8.34756e-12	6.37571	1.01001	5.32244	1.02387e-07	1.66133e-06	corticotropin-releasing factor-binding protein precursor [Source:RefSeq peptide;Acc:NP_001182261]
ENSSSCG00000022895	CRYBG3	Myeloid	393.533	6.31897	0.908271	5.85614	4.73737e-09	1.01314e-07	9.1736	1.00597	8.12511	4.46945e-16	1.56149e-14	7.85645	0.939192	7.30037	2.86975e-13	6.22885e-12	13.8788	1.69596	7.59382	3.10601e-14	7.70477e-13	9.65077	1.04736	8.25958	1.46183e-16	4.81782e-15	4.54858	0.896507	3.95823	7.55057e-05	0.000600844	6.39814	1.15305	4.68162	2.84611e-06	3.733e-05	crystallin beta-gamma domain containing 3 [Source:HGNC Symbol;Acc:HGNC:34427]
ENSSSCG00000014441	CSF1R	Myeloid	7824.27	9.68559	1.13621	7.64432	2.10048e-14	8.20034e-13	10.4274	1.14054	8.26572	1.38856e-16	5.17771e-15	9.65705	1.13609	7.62005	2.53582e-14	6.09539e-13	11.906	1.15957	9.40518	5.19396e-21	2.23802e-19	9.90882	1.13729	7.83335	4.75027e-15	1.32212e-13	10.7807	1.14352	8.55313	1.19791e-17	3.73632e-16	12.6021	1.49677	7.75143	9.08642e-15	3.6327e-13	colony stimulating factor 1 receptor [Source:HGNC Symbol;Acc:HGNC:2433]
ENSSSCG00000025795	CSF3R	Myeloid	1966	5.0567	0.872213	4.65104	3.30266e-06	4.36626e-05	5.10814	0.872265	4.70974	2.48032e-06	2.60904e-05	9.70361	0.905561	9.61129	7.16475e-22	3.19367e-20	10.4813	0.929559	10.1998	1.98644e-24	1.05046e-22	9.9833	0.912817	9.8413	7.47408e-23	3.71596e-21	10.2357	0.92062	10.032	1.10214e-23	5.52685e-22	9.72932	1.15611	7.55057	4.33372e-14	1.61082e-12	colony stimulating factor 3 receptor [Source:HGNC Symbol;Acc:HGNC:2439]
ENSSSCG00000037360	CST3	Myeloid	14779.5	3.73261	0.64776	4.21856	2.45867e-05	0.000273463	8.86393	0.651143	12.0771	1.39536e-33	2.10826e-31	8.80242	0.650999	11.9853	4.2429e-33	4.04606e-31	9.8318	0.654446	13.4951	1.67203e-41	2.52629e-39	9.60342	0.65346	13.166	1.37775e-39	1.95473e-37	6.87717	0.648542	9.06213	1.27929e-19	4.65103e-18	8.60307	0.818205	9.29238	1.50877e-20	1.24489e-18	cystatin-C precursor [Source:RefSeq peptide;Acc:NP_001038067]
ENSSSCG00000010739	CTBP2	Myeloid	194.867	4.25119	0.582714	5.57939	2.41358e-08	4.65664e-07	6.99716	0.655264	9.15228	5.57469e-20	2.90834e-18	3.69985	0.578341	4.66826	3.03759e-06	2.90142e-05	6.82761	0.646357	9.01609	1.94929e-19	7.53424e-18	5.64948	0.604596	7.69023	1.46874e-14	3.90121e-13	6.3131	0.624325	8.51015	1.73712e-17	5.33236e-16	10.6533	1.61095	5.99233	2.06854e-09	4.29739e-08	C-terminal binding protein 2 [Source:HGNC Symbol;Acc:HGNC:2495]
ENSSSCG00000013174	CTNND1	Myeloid	591.467	5.02241	0.934927	4.30238	1.68976e-05	0.000194256	8.51239	0.978319	7.67888	1.6049e-14	4.77531e-13	7.65152	0.957307	6.94816	3.70082e-12	7.26059e-11	8.08055	0.96631	7.32741	2.34636e-13	5.31995e-12	8.35989	0.973689	7.55877	4.06914e-14	1.04274e-12	10.8089	1.1396	8.60733	7.47835e-18	2.37066e-16	5.58223	1.17835	3.88867	0.000100795	0.000948749	catenin delta 1 [Source:HGNC Symbol;Acc:HGNC:2515]
ENSSSCG00000023666	CTSB	Myeloid	14416.7	3.29671	0.421431	5.44978	5.04329e-08	9.18211e-07	3.49008	0.421456	5.90828	3.4569e-09	5.40559e-08	3.53654	0.421463	6.01841	1.76139e-09	2.64413e-08	3.51857	0.42146	5.97583	2.28923e-09	3.31255e-08	3.15363	0.421415	5.11048	3.21333e-07	3.64365e-06	4.26421	0.421598	7.74247	9.75e-15	2.43415e-13	4.11448	0.528596	5.89199	3.81583e-09	7.49888e-08	Cathepsin B Cathepsin B light chain Cathepsin B heavy chain [Source:UniProtKB/Swiss-Prot;Acc:A1E295]
ENSSSCG00000006648	CTSS	Myeloid	20572.6	3.49529	0.223576	11.1608	6.34048e-29	9.57988e-27	3.02162	0.223509	9.04492	1.49771e-19	7.32118e-18	4.50105	0.223818	15.6424	3.74602e-55	1.24518e-52	4.72603	0.2239	16.6415	3.48691e-62	1.26771e-59	4.3157	0.22376	14.8181	1.11904e-49	2.60378e-47	4.2148	0.223732	14.369	8.09909e-47	1.71318e-44	4.98853	0.281163	14.1858	1.12156e-45	6.21344e-43	cathepsin S [Source:HGNC Symbol;Acc:HGNC:2545]
ENSSSCG00000007522	CTSZ	Myeloid	5521.53	2.1754	0.256218	4.58748	4.48623e-06	5.79277e-05	2.46295	0.256291	5.70814	1.14216e-08	1.66307e-07	6.09379	0.260844	19.5281	6.33175e-85	7.36635e-82	5.83713	0.260043	18.6013	3.13635e-77	2.43255e-74	5.89418	0.260209	18.8087	6.41385e-79	6.78352e-76	5.55553	0.259311	17.5679	4.34234e-69	3.15742e-66	4.59468	0.323969	11.0957	1.31564e-28	2.18659e-26	cathepsin Z precursor [Source:RefSeq peptide;Acc:NP_001116576]
ENSSSCG00000006781	CTTNBP2NL	Myeloid	66.6667	5.38666	1.21817	3.60101	0.000316981	0.00281509	8.34336	1.42913	5.13835	2.77166e-07	3.36592e-06	10.2348	1.71094	5.39752	6.75687e-08	8.30967e-07	11.5047	1.86199	5.64164	1.68441e-08	2.17496e-07	7.67155	1.34852	4.94732	7.52405e-07	8.09758e-06	8.34336	1.42913	5.13835	2.77166e-07	3.12154e-06	12.5104	2.53282	4.5445	5.50657e-06	6.82252e-05	CTTNBP2 N-terminal like [Source:HGNC Symbol;Acc:HGNC:25330]
ENSSSCG00000008959	CXCL2	Myeloid	86.0667	7.37308	1.06974	5.9576	2.55972e-09	5.62946e-08	5.28582	0.944361	4.53833	5.67017e-06	5.63818e-05	5.24098	0.943081	4.49694	6.89372e-06	6.24622e-05	7.51002	1.08482	6.001	1.96111e-09	2.875e-08	6.32961	0.987461	5.39728	6.76574e-08	8.46372e-07	5.93377	0.96768	5.09856	3.42255e-07	3.78497e-06	7.65459	1.52843	4.35387	1.33755e-05	0.000150493	C-X-C motif chemokine 2 precursor [Source:RefSeq peptide;Acc:NP_001001861]
ENSSSCG00000025049	CYBRD1	Myeloid	3996	4.42002	0.420945	8.12462	4.48778e-16	2.13979e-14	6.41441	0.42519	12.7341	3.82362e-37	7.3584e-35	2.34298	0.419852	3.1987	0.00138048	0.00862076	3.40507	0.420222	5.72334	1.04453e-08	1.38406e-07	3.11904	0.420094	5.04422	4.55381e-07	5.06008e-06	6.94537	0.427689	13.9012	6.23201e-44	1.15084e-41	2.40219	0.526597	2.66273	0.00775088	0.0474848	cytochrome b reductase 1 [Source:RefSeq peptide;Acc:NP_001121924]
ENSSSCG00000009399	CYSLTR2	Myeloid	136.733	4.74819	0.72498	5.17005	2.34029e-07	3.79205e-06	7.32271	0.829714	7.62034	2.53002e-14	7.377e-13	6.38119	0.77148	6.97515	3.05549e-12	6.0558e-11	5.52315	0.741128	6.10307	1.04051e-09	1.57008e-08	4.83694	0.72644	5.28184	1.27892e-07	1.54186e-06	3.53233	0.711701	3.55814	0.000373494	0.00265277	6.20808	1.0057	5.17856	2.23608e-07	3.45021e-06	cysteinyl leukotriene receptor 2 [Source:RefSeq peptide;Acc:NP_999295]
ENSSSCG00000013079	DAGLA	Myeloid	116.6	7.48832	1.07672	6.02602	1.68042e-09	3.76686e-08	12.3784	1.74161	6.53326	6.43534e-11	1.2499e-09	11.0591	1.60514	6.2668	3.6854e-10	5.95499e-09	10.2609	1.46663	6.31442	2.7117e-10	4.38166e-09	9.72443	1.35309	6.44776	1.13512e-10	1.97694e-09	12.3784	1.74161	6.53326	6.43534e-11	1.10589e-09	9.13171	1.91743	4.24095	2.22578e-05	0.00024022	diacylglycerol lipase alpha [Source:HGNC Symbol;Acc:HGNC:1165]
ENSSSCG00000010949	DAPK1	Myeloid	417.467	4.10919	0.495075	6.28023	3.38079e-10	8.32399e-09	6.23935	0.516664	10.1407	3.64348e-24	2.77047e-22	7.02635	0.536152	11.24	2.59372e-29	1.88596e-27	8.54519	0.615121	12.2662	1.37584e-34	1.4165e-32	7.5806	0.557047	11.8134	3.32896e-32	3.02571e-30	4.91503	0.49994	7.831	4.83994e-15	1.25407e-13	5.01285	0.63687	6.30088	2.95954e-10	7.09923e-09	death associated protein kinase 1 [Source:HGNC Symbol;Acc:HGNC:2674]
ENSSSCG00000036766	DIRC2	Myeloid	227.133	4.19614	0.376553	8.4879	2.10409e-17	1.1941e-15	3.49938	0.365163	6.84457	7.67078e-12	1.71619e-10	2.32363	0.354599	3.73275	0.000189402	0.00139639	2.96474	0.359335	5.4677	4.55924e-08	5.63679e-07	2.61966	0.356535	4.54277	5.55201e-06	5.28576e-05	2.10969	0.353422	3.13984	0.00169043	0.0105281	2.46299	0.451536	3.24002	0.00119523	0.00894228	disrupted in renal carcinoma 2 [Source:HGNC Symbol;Acc:HGNC:16628]
ENSSSCG00000005641	DNM1	Myeloid	27.2	9.9988	2.00268	4.49337	7.01037e-06	8.67645e-05	9.9988	2.00268	4.49337	7.01037e-06	6.86521e-05	5.3941	1.47055	2.98807	0.00280746	0.0164793	6.2848	1.53665	3.43917	0.000583494	0.00384175	7.49617	1.71116	3.79636	0.000146834	0.00111944	5.3941	1.47055	2.98807	0.00280746	0.0167842	9.87379	2.69667	3.29064	0.000999587	0.00760575	dynamin 1 [Source:HGNC Symbol;Acc:HGNC:2972]
ENSSSCG00000035045	DOCK1	Myeloid	274.867	5.86751	0.452489	10.7572	5.48112e-27	6.85671e-25	11.6234	1.49677	7.09756	1.26976e-12	3.14306e-11	3.00219	0.414137	4.8346	1.33412e-06	1.35793e-05	4.14601	0.421787	7.45877	8.73361e-14	2.06939e-12	3.21805	0.415166	5.34255	9.16456e-08	1.12114e-06	10.624	1.09884	8.7583	1.98222e-18	6.55146e-17	13.0762	2.10475	5.73758	9.60368e-09	1.78767e-07	dedicator of cytokinesis 1 [Source:HGNC Symbol;Acc:HGNC:2987]
ENSSSCG00000025602	DOCK4	Myeloid	302.733	4.95828	0.781813	5.06295	4.12817e-07	6.41216e-06	8.10684	0.858464	8.27856	1.24677e-16	4.66395e-15	6.88459	0.809942	7.26545	3.71811e-13	7.9662e-12	8.14804	0.86085	8.30346	1.0112e-16	3.12049e-15	7.26088	0.82104	7.62555	2.42991e-14	6.39583e-13	4.29248	0.778024	4.23185	2.3178e-05	0.000200635	6.05206	1.00744	5.01476	5.31004e-07	7.74148e-06	dedicator of cytokinesis 4 [Source:HGNC Symbol;Acc:HGNC:19192]
ENSSSCG00000012054	DOPEY2	Myeloid	323.667	2.36138	0.407916	3.3374	0.000845658	0.00682274	2.71837	0.409271	4.19861	2.6856e-05	0.000237599	3.50329	0.413704	6.05092	1.44024e-09	2.18174e-08	5.79523	0.452633	10.5941	3.17496e-26	1.90399e-24	3.20303	0.411725	5.35073	8.75993e-08	1.0773e-06	2.34131	0.40785	3.28875	0.00100634	0.00655613	5.3698	0.55752	7.83793	4.5805e-15	1.9378e-13	dopey family member 2 [Source:HGNC Symbol;Acc:HGNC:1291]
ENSSSCG00000023972	DRAM1	Myeloid	341.867	3.63116	0.456223	5.76727	8.05669e-09	1.67079e-07	2.76954	0.451872	3.91604	9.00171e-05	0.00074432	3.9585	0.458668	6.45019	1.1171e-10	1.91969e-09	2.60417	0.451291	3.55462	0.000378529	0.00257382	3.32234	0.454363	5.1112	3.20113e-07	3.63336e-06	2.86675	0.452244	4.12775	3.6633e-05	0.000308162	3.45916	0.572659	4.29428	1.75258e-05	0.000193633	DNA damage-regulated autophagy modulator protein 1 [Source:RefSeq peptide;Acc:NP_001177215]
ENSSSCG00000024800	DSC3	Myeloid	157.2	7.26513	0.852614	7.34814	2.00983e-13	7.0007e-12	7.82733	0.891116	7.66156	1.83692e-14	5.41031e-13	9.16951	1.05505	7.74323	9.69236e-15	2.41976e-13	9.15093	1.05185	7.74911	9.25408e-15	2.38718e-13	10.1292	1.26907	7.19362	6.30956e-13	1.40893e-11	10.1292	1.26907	7.19362	6.30956e-13	1.33464e-11	6.93152	1.08266	5.47867	4.28538e-08	7.31028e-07	desmocollin 3 [Source:HGNC Symbol;Acc:HGNC:3037]
ENSSSCG00000022098	DUS2	Myeloid	841	1.90494	0.311585	2.9043	0.00368073	0.0252505	2.1596	0.312033	3.71629	0.000202173	0.00157541	2.33665	0.312393	4.27873	1.87966e-05	0.000161031	2.30307	0.312321	4.17222	3.01642e-05	0.000244041	2.23106	0.312173	3.94353	8.02909e-05	0.000638712	2.88876	0.313845	6.01811	1.76468e-09	2.64566e-08	2.39406	0.392617	3.55068	0.000384236	0.00322525	dihydrouridine synthase 2 [Source:HGNC Symbol;Acc:HGNC:26014]
ENSSSCG00000003513	ECE1	Myeloid	527.933	3.86356	0.438883	6.52465	6.81588e-11	1.84656e-09	5.73841	0.457416	10.3591	3.80581e-25	3.11808e-23	2.83396	0.435241	4.21366	2.51265e-05	0.00021091	2.91351	0.43544	4.39444	1.11061e-05	9.68578e-05	2.77291	0.435095	4.07477	4.60603e-05	0.000380856	4.11853	0.440255	7.08346	1.40598e-12	2.87977e-11	3.24172	0.550178	4.07453	4.61072e-05	0.000468073	endothelin converting enzyme 1 [Source:HGNC Symbol;Acc:HGNC:3146]
ENSSSCG00000029230	ECM1	Myeloid	1577.4	2.93567	0.452078	4.28172	1.85451e-05	0.000211939	6.4409	0.461915	11.779	5.00809e-32	6.9362e-30	4.9809	0.455078	8.74774	2.17663e-18	7.31875e-17	6.07832	0.459543	11.0508	2.17251e-28	1.54116e-26	4.53246	0.454023	7.78036	7.23187e-15	1.99373e-13	6.24555	0.460565	11.3894	4.72392e-30	3.71338e-28	8.37782	0.61632	11.9708	5.05623e-33	1.25158e-30	extracellular matrix protein 1 [Source:HGNC Symbol;Acc:HGNC:3153]
ENSSSCG00000005828	EGFL7	Myeloid	149.933	3.78641	0.937406	2.97247	0.00295413	0.0207038	6.45344	0.976606	5.58407	2.34956e-08	3.2619e-07	7.36371	1.01523	6.26823	3.65168e-10	5.90871e-09	7.49935	1.02312	6.3525	2.11842e-10	3.46635e-09	8.67777	1.12682	6.81364	9.51568e-12	1.8606e-10	10.2093	1.41665	6.50077	7.99105e-11	1.36317e-09	8.59338	1.55688	4.87731	1.07541e-06	1.49478e-05	EGF like domain multiple 7 [Source:HGNC Symbol;Acc:HGNC:20594]
ENSSSCG00000020666	EHD4	Myeloid	1662.73	2.25402	0.39038	3.21231	0.00131674	0.0100849	2.66301	0.390659	4.25693	2.07255e-05	0.000187174	3.96203	0.392305	7.55032	4.34183e-14	1.0184e-12	4.64336	0.393972	9.24777	2.29222e-20	9.45662e-19	4.12108	0.392628	7.9492	1.87715e-15	5.52881e-14	4.41216	0.393317	8.67534	4.12317e-18	1.33247e-16	2.77185	0.490125	3.6151	0.000300235	0.00258544	EH domain containing 4 [Source:HGNC Symbol;Acc:HGNC:3245]
ENSSSCG00000004199	EPB41L2	Myeloid	2134.93	5.8849	0.437297	11.1707	5.67607e-29	8.80472e-27	6.05503	0.43791	11.5436	7.95687e-31	9.74423e-29	7.00154	0.442978	13.5481	8.12556e-42	1.31295e-39	7.5753	0.448061	14.675	9.32321e-49	2.04653e-46	7.28744	0.445267	14.1206	2.83564e-45	5.59149e-43	5.33815	0.43575	9.95559	2.38409e-23	1.17032e-21	3.97887	0.544689	5.46894	4.52724e-08	7.68904e-07	erythrocyte membrane protein band 4.1 like 2 [Source:HGNC Symbol;Acc:HGNC:3379]
ENSSSCG00000009666	EPHX2	Myeloid	290.867	4.18161	0.999024	3.18472	0.00144896	0.0109676	7.52909	1.0407	6.27375	3.52455e-10	6.26983e-09	7.76448	1.0487	6.45038	1.11571e-10	1.91969e-09	10.9866	1.42275	7.01922	2.23106e-12	4.53779e-11	10.4058	1.29656	7.25439	4.03482e-13	9.22221e-12	7.66804	1.04527	6.37926	1.77944e-10	2.95743e-09	7.80109	1.34505	5.05637	4.27304e-07	6.30869e-06	bifunctional epoxide hydrolase 2 [Source:RefSeq peptide;Acc:NP_001001641]
ENSSSCG00000000600	EPS8	Myeloid	484.067	3.38371	0.472438	5.04556	4.5219e-07	6.98643e-06	5.29585	0.482489	8.90352	5.41037e-19	2.54835e-17	7.84548	0.543959	12.5846	2.56769e-36	2.98725e-34	14.0642	1.51693	8.61225	7.16414e-18	2.44421e-16	8.95467	0.619236	12.8459	9.06348e-38	1.17161e-35	7.24486	0.519651	12.0174	2.87845e-33	2.86221e-31	7.29641	0.666206	9.45116	3.35112e-21	2.9761e-19	epidermal growth factor receptor pathway substrate 8 [Source:HGNC Symbol;Acc:HGNC:3420]
ENSSSCG00000038185	EREG	Myeloid	65.8	6.45146	0.90388	6.03117	1.62773e-09	3.66286e-08	6.02778	0.873096	5.75857	8.48309e-09	1.26854e-07	6.16179	0.881997	5.85239	4.84568e-09	6.84158e-08	6.46852	0.905291	6.04062	1.53522e-09	2.26947e-08	5.93392	0.867281	5.68895	1.27825e-08	1.76408e-07	5.81933	0.860622	5.59982	2.14574e-08	2.83354e-07	7.41336	1.41521	4.53174	5.84986e-06	7.17904e-05	epiregulin [Source:HGNC Symbol;Acc:HGNC:3443]
ENSSSCG00000015010	EXPH5	Myeloid	55.6	8.2444	1.82385	3.97204	7.12612e-05	0.000720289	7.63304	1.75862	3.77172	0.000162124	0.00128397	6.25248	1.67351	3.1386	0.00169757	0.0104109	10.0666	2.04516	4.43318	9.28525e-06	8.15895e-05	7.63304	1.75862	3.77172	0.000162124	0.00122398	6.33938	1.67704	3.18381	0.00145349	0.00918018	12.3039	2.8836	3.92006	8.85272e-05	0.000844894	exophilin 5 [Source:HGNC Symbol;Acc:HGNC:30578]
ENSSSCG00000006369	F11R	Myeloid	196.867	3.56876	0.498271	5.15534	2.5317e-07	4.0682e-06	5.41779	0.524371	8.42493	3.60979e-17	1.40456e-15	4.62928	0.509323	7.12569	1.0356e-12	2.15146e-11	5.94357	0.539636	9.16093	5.14534e-20	2.08574e-18	4.58031	0.508621	7.03924	1.93294e-12	4.11864e-11	5.9494	0.539836	9.16834	4.80359e-20	1.82036e-18	6.38222	0.718294	7.49306	6.72848e-14	2.43103e-12	junctional adhesion molecule A precursor [Source:RefSeq peptide;Acc:NP_001121916]
ENSSSCG00000024310	F13A1	Myeloid	9371.67	5.49635	1.37569	3.26844	0.00108143	0.00850667	9.61863	1.38011	6.24487	4.24165e-10	7.46555e-09	6.09781	1.37583	3.70527	0.000211165	0.00154801	7.70455	1.37667	4.87014	1.11521e-06	1.13116e-05	5.66913	1.37572	3.39395	0.000688928	0.00464368	9.8834	1.38106	6.43232	1.25675e-10	2.12206e-09	9.88587	1.73181	5.13097	2.8826e-07	4.37239e-06	coagulation factor XIII A chain [Source:HGNC Symbol;Acc:HGNC:3531]
ENSSSCG00000033703	FAM111A	Myeloid	1397.93	7.94171	0.606278	11.4497	2.35942e-30	4.0367e-28	9.7015	0.660433	13.1754	1.21517e-39	2.82746e-37	5.24601	0.585849	7.24762	4.24155e-13	9.07099e-12	9.25735	0.640621	12.8896	5.15047e-38	6.65784e-36	3.04548	0.582871	3.50932	0.00044925	0.00312969	6.88662	0.593833	9.91291	3.65833e-23	1.77337e-21	11.6575	1.10893	9.61068	7.20686e-22	6.70757e-20	family with sequence similarity 111 member A [Source:HGNC Symbol;Acc:HGNC:24725]
ENSSSCG00000013147	FAM111B	Myeloid	468.267	5.20527	0.563401	7.46407	8.38883e-14	3.07873e-12	4.91695	0.561451	6.97647	3.0269e-12	7.143e-11	7.07707	0.591294	10.2776	8.89266e-25	4.83445e-23	8.16656	0.63215	11.3368	8.62388e-30	6.55753e-28	5.78364	0.568676	8.41189	4.03449e-17	1.37646e-15	7.10777	0.592099	10.3154	5.99997e-25	3.24668e-23	5.81884	0.72116	6.68206	2.35602e-11	6.41918e-10	family with sequence similarity 111 member B [Source:HGNC Symbol;Acc:HGNC:24200]
ENSSSCG00000005614	FAM129B	Myeloid	559.267	7.34202	0.645278	9.82836	8.49946e-23	8.03925e-21	10.3339	0.845509	11.0394	2.46653e-28	2.5673e-26	6.35989	0.628628	8.52633	1.51064e-17	4.72439e-16	6.95511	0.6374	9.34281	9.38096e-21	3.98314e-19	5.20883	0.619045	6.79891	1.05413e-11	2.05423e-10	6.621	0.63205	8.89328	5.93312e-19	2.02422e-17	6.72111	0.803667	7.11876	1.089e-12	3.45216e-11	family with sequence similarity 129 member B [Source:HGNC Symbol;Acc:HGNC:25282]
ENSSSCG00000020813	FAM20C	Myeloid	389.6	4.03564	0.550577	5.51356	3.51649e-08	6.5879e-07	11.2301	1.16718	8.76476	1.87182e-18	8.21766e-17	4.45623	0.552878	6.25135	4.06917e-10	6.55689e-09	7.57409	0.618056	10.6367	2.01072e-26	1.22475e-24	3.37923	0.548079	4.34103	1.41816e-05	0.000125562	4.51104	0.553229	6.34644	2.20354e-10	3.61579e-09	11.4579	1.59725	6.54746	5.85238e-11	1.51979e-09	FAM20C, golgi associated secretory pathway kinase [Source:HGNC Symbol;Acc:HGNC:22140]
ENSSSCG00000040377	FCER2	CD21pB	632.867	4.46452	0.910818	3.80375	0.000142521	0.00503979	9.61928	0.992984	8.68018	3.95138e-18	2.21011e-16	9.26939	0.975629	8.47595	2.33163e-17	1.41442e-15	12.5082	1.40157	8.21092	2.19491e-16	1.21022e-14	7.54297	0.929408	7.03993	1.9233e-12	6.84272e-11	9.88143	1.00868	8.80496	1.30901e-18	5.83486e-17	6.21852	1.16443	4.4816	7.40846e-06	0.000169665	low affinity immunoglobulin epsilon Fc receptor [Source:RefSeq peptide;Acc:NP_001138689]
ENSSSCG00000005477	FKBP15	Myeloid	2378.33	2.16388	0.220228	5.28491	1.25768e-07	2.15174e-06	2.37509	0.220479	6.23683	4.4653e-10	7.8355e-09	1.92975	0.219988	4.22635	2.37513e-05	0.000200816	1.98153	0.220038	4.46075	8.16748e-06	7.23139e-05	1.85474	0.219919	3.88663	0.000101648	0.000795271	1.79128	0.219864	3.59895	0.0003195	0.00230159	1.9924	0.275947	3.59634	0.000322729	0.00276686	FK506 binding protein 15 [Source:HGNC Symbol;Acc:HGNC:23397]
ENSSSCG00000021606	FLVCR2	Myeloid	269	6.97127	0.812408	7.35008	1.98084e-13	6.92044e-12	11.0772	1.31159	7.68321	1.5515e-14	4.64014e-13	8.97279	0.929627	8.57633	9.79489e-18	3.11349e-16	10.1967	1.1019	8.34624	7.04716e-17	2.20394e-15	8.89134	0.921721	8.56153	1.11381e-17	3.95062e-16	8.75831	0.909563	8.52971	1.46712e-17	4.53948e-16	10.3702	1.74372	5.37367	7.71482e-08	1.27131e-06	feline leukemia virus subgroup C receptor-related protein 2 [Source:RefSeq peptide;Acc:NP_001136312]
ENSSSCG00000016174	FN1	Myeloid	1188.27	8.97852	0.692182	11.5266	9.68709e-31	1.73384e-28	12.5119	1.05395	10.9226	8.9875e-28	9.01385e-26	8.76862	0.686316	11.3193	1.0529e-29	7.90289e-28	7.93063	0.669537	10.3514	4.1249e-25	2.32957e-23	10.0166	0.736226	12.247	1.74252e-34	1.74763e-32	11.1065	0.824878	12.2521	1.63726e-34	1.71603e-32	10.3155	0.985056	9.45683	3.17429e-21	2.84074e-19	fibronectin 1 [Source:HGNC Symbol;Acc:HGNC:3778]
ENSSSCG00000022236	FOLR1	Myeloid	7199.67	6.15005	0.581876	8.85077	8.69141e-19	5.81125e-17	8.37591	0.586286	12.5807	2.6953e-36	4.89955e-34	7.63068	0.584028	11.3534	7.13689e-30	5.3916e-28	7.96029	0.584887	11.9002	1.18003e-32	1.08956e-30	8.49606	0.586771	12.7751	2.25855e-37	2.76293e-35	8.70067	0.587693	13.1032	3.15632e-39	4.26984e-37	8.92874	0.744227	10.6536	1.67667e-26	2.35016e-24	folate receptor alpha precursor [Source:RefSeq peptide;Acc:NP_999476]
ENSSSCG00000030877	FRMPD4	Myeloid	191.067	3.13037	0.445501	4.78197	1.73584e-06	2.41854e-05	3.03737	0.444844	4.57997	4.65049e-06	4.68837e-05	9.33962	0.939118	8.88027	6.66966e-19	2.35136e-17	12.3686	1.5068	7.54485	4.52797e-14	1.09747e-12	8.34147	0.732127	10.0276	1.15293e-23	6.01486e-22	2.17024	0.440359	2.65747	0.00787299	0.0429617	5.88892	0.6544	7.47085	7.96789e-14	2.84351e-12	FERM and PDZ domain containing 4 [Source:HGNC Symbol;Acc:HGNC:29007]
ENSSSCG00000027659	FUCA1	Myeloid	1655.87	2.81398	0.273697	6.62768	3.40993e-11	9.4907e-10	2.52126	0.273311	5.56603	2.60604e-08	3.59652e-07	2.85316	0.273755	6.76942	1.29304e-11	2.40306e-10	2.83262	0.273725	6.69511	2.15502e-11	3.94207e-10	2.51842	0.273308	5.5557	2.76501e-08	3.6158e-07	3.49359	0.274959	9.06896	1.20163e-19	4.39614e-18	2.92492	0.343823	5.59858	2.1612e-08	3.88015e-07	tissue alpha-L-fucosidase precursor [Source:RefSeq peptide;Acc:NP_001302557]
ENSSSCG00000017156	GAA	Myeloid	1006.47	2.73852	0.298175	5.83053	5.52507e-09	1.16658e-07	3.44393	0.299836	8.15091	3.61199e-16	1.28116e-14	2.92293	0.298534	6.44122	1.18517e-10	2.03068e-09	3.10966	0.298948	7.05694	1.70212e-12	3.54882e-11	3.2643	0.299334	7.56445	3.89497e-14	1.00252e-12	3.65297	0.300503	8.82845	1.06138e-18	3.55853e-17	3.68635	0.378786	7.092	1.32188e-12	4.1564e-11	glucosidase alpha, acid [Source:HGNC Symbol;Acc:HGNC:4065]
ENSSSCG00000009048	GAB1	Myeloid	60.3333	5.03798	1.31703	3.06597	0.00216964	0.015678	9.04624	1.70043	4.73188	2.22454e-06	2.37216e-05	8.11689	1.52263	4.67407	2.95292e-06	2.82519e-05	7.41954	1.43859	4.46238	8.10552e-06	7.182e-05	6.56383	1.37341	4.05111	5.09749e-05	0.000416462	11.2259	1.93216	5.29247	1.20672e-07	1.43255e-06	8.34454	1.92317	3.81897	0.000134009	0.00123343	GRB2 associated binding protein 1 [Source:HGNC Symbol;Acc:HGNC:4066]
ENSSSCG00000008486	GALM	Myeloid	447	4.41839	0.52829	6.47067	9.75673e-11	2.57977e-09	6.56528	0.552642	10.0703	7.47263e-24	5.46771e-22	5.55821	0.536967	8.48882	2.08744e-17	6.42467e-16	5.12066	0.532829	7.73356	1.0458e-14	2.67404e-13	5.80074	0.539843	8.89284	5.95642e-19	2.33323e-17	7.54992	0.581944	11.2552	2.18259e-29	1.57716e-27	4.86131	0.669806	5.76482	8.17473e-09	1.54141e-07	Aldose 1-epimerase [Source:UniProtKB/Swiss-Prot;Acc:Q9GKX6]
ENSSSCG00000016431	GALNTL5	Myeloid	52.2667	6.07194	1.13308	4.47622	7.59745e-06	9.31388e-05	6.41475	1.15617	4.68334	2.82243e-06	2.94231e-05	4.03598	1.06456	2.85185	0.00434654	0.0243348	4.30581	1.06929	3.09161	0.00199076	0.0119138	7.1078	1.22056	5.00411	5.6121e-07	6.15374e-06	10.9209	1.77916	5.57618	2.45855e-08	3.22104e-07	6.84925	1.501	3.89691	9.7428e-05	0.000920778	polypeptide N-acetylgalactosaminyltransferase like 5 [Source:HGNC Symbol;Acc:HGNC:21725]
ENSSSCG00000025564	GAS2L1	Myeloid	51.6	5.50517	0.987594	4.56176	5.07263e-06	6.5138e-05	3.56879	0.931521	2.75763	0.0058222	0.0338847	4.25022	0.943799	3.44376	0.00057369	0.00384022	6.10305	1.02464	4.98035	6.34691e-07	6.60464e-06	5.54648	0.989729	4.59366	4.35538e-06	4.20153e-05	7.34961	1.16203	5.46425	4.6486e-08	5.76566e-07	10.9912	2.34149	4.26704	1.98088e-05	0.00021639	GAS2-like protein 1 [Source:RefSeq peptide;Acc:NP_001231763]
ENSSSCG00000015545	GLUL	Myeloid	6001.67	4.30322	0.285603	11.5658	6.14279e-31	1.15266e-28	5.46484	0.286769	15.5695	1.17353e-54	5.25109e-52	7.00886	0.290772	20.6652	7.12102e-95	1.38077e-91	6.3963	0.288671	18.6936	5.58185e-78	4.63852e-75	5.78145	0.287285	16.6436	3.36843e-62	1.50725e-59	4.60655	0.285824	12.6181	1.67815e-36	1.99221e-34	3.95349	0.358217	8.24498	1.6519e-16	8.9638e-15	glutamine synthetase [Source:RefSeq peptide;Acc:NP_999074]
ENSSSCG00000037583	GNB4	Myeloid	522.933	5.0666	0.769057	5.28777	1.23813e-07	2.12142e-06	6.5146	0.779281	7.07653	1.47812e-12	3.60513e-11	10.9417	1.05738	9.40216	5.34535e-21	2.18971e-19	14.3413	1.63207	8.17449	2.97116e-16	8.79555e-15	9.63057	0.893603	9.65817	4.53904e-22	2.17313e-20	11.2809	1.12243	9.15956	5.21086e-20	1.96192e-18	7.69446	1.03172	6.48866	8.66013e-11	2.20464e-09	G protein subunit beta 4 [Source:HGNC Symbol;Acc:HGNC:20731]
ENSSSCG00000037964	GNG10	Myeloid	2391.2	3.37655	0.441172	5.38689	7.16862e-08	1.2694e-06	3.08054	0.441004	4.71774	2.38484e-06	2.51771e-05	5.83883	0.445228	10.8682	1.63362e-27	1.07376e-25	5.43924	0.444034	9.99754	1.5623e-23	7.83438e-22	5.01169	0.443071	9.05429	1.37461e-19	5.7115e-18	5.50038	0.444196	10.1315	4.00362e-24	2.0519e-22	4.05027	0.554839	5.49757	3.85053e-08	6.63951e-07	G protein subunit gamma 10 [Source:HGNC Symbol;Acc:HGNC:4402]
ENSSSCG00000023715	GNS	Myeloid	5543.07	2.17417	0.297708	3.94403	8.01231e-05	0.000800818	2.30335	0.29775	4.37731	1.20154e-05	0.000112732	2.42289	0.297793	4.77811	1.7695e-06	1.77163e-05	2.08686	0.297682	3.65108	0.000261136	0.00182138	2.22635	0.297725	4.11909	3.80378e-05	0.000316773	2.41281	0.297789	4.74433	2.09196e-06	2.09268e-05	2.16618	0.373333	3.12371	0.00178587	0.0129451	glucosamine (N-acetyl)-6-sulfatase [Source:HGNC Symbol;Acc:HGNC:4422]
ENSSSCG00000007861	GP2	CD21pB	44.2667	4.21041	0.894937	3.58731	0.000334111	0.0107974	4.08234	0.890743	3.46042	0.000539334	0.00582109	4.08234	0.890743	3.46042	0.000539334	0.0061521	3.55547	0.87675	2.91471	0.00356023	0.0352808	3.69918	0.880099	3.0669	0.00216291	0.0189912	4.71442	0.915253	4.05836	4.9419e-05	0.00042213	4.48258	1.17765	2.95724	0.00310403	0.0368755	glycoprotein 2 [Source:HGNC Symbol;Acc:HGNC:4441]
ENSSSCG00000009233	GPAT3	Myeloid	127.8	4.99464	0.509527	7.8399	4.50901e-15	1.96471e-13	5.2476	0.518071	8.19887	2.42648e-16	8.90526e-15	4.91996	0.507252	7.72784	1.09388e-14	2.70771e-13	4.1346	0.488875	6.41186	1.43754e-10	2.39947e-09	4.23437	0.490727	6.59097	4.3695e-11	7.95537e-10	3.64277	0.481324	5.49063	4.00496e-08	5.03716e-07	4.01427	0.615524	4.89708	9.72706e-07	1.36507e-05	glycerol-3-phosphate acyltransferase 3 [Source:HGNC Symbol;Acc:HGNC:28157]
ENSSSCG00000022483	GPBAR1	Myeloid	53.0667	5.16989	1.21532	3.43111	0.000601108	0.00503477	6.93413	1.3026	4.5556	5.2237e-06	5.22999e-05	11.1794	1.86047	5.47142	4.46442e-08	5.63331e-07	6.55057	1.275	4.3534	1.34043e-05	0.000114919	9.85118	1.74697	5.0666	4.04987e-07	4.5304e-06	9.06132	1.62266	4.96797	6.76575e-07	7.24128e-06	8.01091	2.07783	3.37414	0.000740465	0.0058169	G protein-coupled bile acid receptor 1 [Source:HGNC Symbol;Acc:HGNC:19680]
ENSSSCG00000007043	GPCPD1	Myeloid	2113.33	2.89946	0.480476	3.9533	7.70819e-05	0.000775083	2.32325	0.480146	2.75593	0.00585253	0.0340272	2.71812	0.480357	3.57676	0.000347885	0.00243855	3.32682	0.48082	4.83927	1.30316e-06	1.31088e-05	2.48766	0.480227	3.09782	0.00194947	0.0121155	2.5478	0.480259	3.22284	0.00126927	0.00812695	3.82668	0.603826	4.68127	2.851e-06	3.734e-05	glycerophosphocholine phosphodiesterase 1 [Source:HGNC Symbol;Acc:HGNC:26957]
ENSSSCG00000015872	GPD2	Myeloid	814.333	2.41495	0.244249	5.79307	6.91105e-09	1.44092e-07	2.13752	0.24342	4.67309	2.96707e-06	3.07655e-05	2.54562	0.244698	6.31645	2.67632e-10	4.404e-09	2.45098	0.244369	5.93768	2.8909e-09	4.12671e-08	1.68227	0.242357	2.81516	0.00487528	0.0280232	1.78759	0.242575	3.2468	0.00116711	0.00751421	2.1382	0.305636	3.72403	0.000196065	0.00176413	glycerol-3-phosphate dehydrogenase 2 [Source:HGNC Symbol;Acc:HGNC:4456]
ENSSSCG00000032241	GPNMB	Myeloid	168.533	7.00849	0.762596	7.879	3.30011e-15	1.4654e-13	5.16195	0.701143	5.93596	2.92135e-09	4.64303e-08	7.2998	0.780597	8.07049	7.00175e-16	1.93029e-14	5.79415	0.714637	6.7085	1.9663e-11	3.61962e-10	5.94057	0.718646	6.87483	6.20637e-12	1.25138e-10	4.0826	0.687942	4.4809	7.43305e-06	6.90152e-05	4.82371	0.87882	4.35095	1.35546e-05	0.000152324	transmembrane glycoprotein NMB precursor [Source:RefSeq peptide;Acc:NP_001092054]
ENSSSCG00000038853	GPR137B	Myeloid	540.6	4.40098	0.287489	11.83	2.73231e-32	5.48063e-30	6.02907	0.320449	15.6938	1.66748e-55	8.81792e-53	2.66456	0.275572	6.04039	1.5374e-09	2.32589e-08	2.53015	0.275107	5.56202	2.66663e-08	3.37579e-07	2.46521	0.274897	5.33003	9.81961e-08	1.1975e-06	2.91361	0.276554	6.91948	4.53304e-12	8.92342e-11	3.19257	0.351209	6.24292	4.29489e-10	1.00739e-08	G protein-coupled receptor 137B [Source:HGNC Symbol;Acc:HGNC:11862]
ENSSSCG00000016599	GPR37	NK	839.467	6.79294	0.771852	7.50525	6.13125e-14	3.56655e-11	11.3104	0.92401	11.1584	6.51844e-29	2.80872e-26	9.74102	0.820543	10.6527	1.69344e-26	1.40725e-23	6.66282	0.771224	7.34264	2.09423e-13	1.52277e-10	15.612	1.63277	8.94919	3.58103e-19	1.09636e-16	11.6023	0.95672	11.0819	1.53554e-28	1.62404e-25	11.3976	0.933206	11.1418	7.84976e-29	1.32354e-26	G protein-coupled receptor 37 [Source:HGNC Symbol;Acc:HGNC:4494]
ENSSSCG00000035592	GPR55	NK	1054.07	3.5144	0.464804	5.40959	6.31687e-08	6.33538e-06	4.32496	0.465874	7.13704	9.53648e-13	7.25147e-11	7.0424	0.479625	12.5982	2.16065e-36	3.59101e-33	3.18617	0.464515	4.70634	2.52202e-06	0.00025078	4.67863	0.466565	7.8845	3.15786e-15	6.22687e-13	6.3817	0.473698	11.361	6.53652e-30	8.44954e-27	11.7553	0.790571	13.6045	3.76486e-42	1.75202e-39	G protein-coupled receptor 55 [Source:HGNC Symbol;Acc:HGNC:4511]
ENSSSCG00000017355	GRN	Myeloid	3129.4	3.27898	0.705619	3.22976	0.00123893	0.00955215	5.63614	0.707252	6.55515	5.55847e-11	1.08502e-09	4.94724	0.706482	5.58717	2.30794e-08	3.01692e-07	5.59921	0.707201	6.5034	7.85234e-11	1.35944e-09	4.24826	0.705999	4.60094	4.20583e-06	4.06739e-05	9.79053	0.740166	11.8764	1.56922e-32	1.48425e-30	7.06811	0.890935	6.81094	9.6961e-12	2.76481e-10	granulins precursor [Source:RefSeq peptide;Acc:NP_001038043]
ENSSSCG00000006955	GSDMD	Myeloid	885.467	3.92966	0.454783	6.44188	1.17999e-10	3.07802e-09	3.61324	0.453935	5.75685	8.56983e-09	1.27986e-07	2.72876	0.452347	3.82176	0.000132503	0.000999702	2.98765	0.452717	4.3905	1.13088e-05	9.84044e-05	2.74296	0.452366	3.85299	0.000116684	0.00090742	4.85016	0.458606	8.39535	4.64503e-17	1.39279e-15	4.10248	0.572634	5.41792	6.02981e-08	1.01374e-06	gasdermin D [Source:HGNC Symbol;Acc:HGNC:25697]
ENSSSCG00000008870	GUCY1B1	Myeloid	212.733	3.16251	0.586976	3.68416	0.000229456	0.00208997	2.77592	0.585104	3.03522	0.00240363	0.0151648	4.31282	0.596572	5.5531	2.80651e-08	3.64407e-07	7.37919	0.711446	8.96651	3.06053e-19	1.15605e-17	3.97096	0.592909	5.01081	5.4201e-07	5.97134e-06	3.45772	0.588777	4.17428	2.98934e-05	0.000253484	3.0031	0.736885	2.71833	0.00656118	0.0408853	guanylate cyclase soluble subunit beta-1 [Source:RefSeq peptide;Acc:NP_001018042]
ENSSSCG00000027389	HERPUD2	NK	2485.67	2.77127	0.243561	7.27239	3.53182e-13	1.64357e-10	2.95616	0.243751	8.02522	1.01347e-15	1.07188e-13	2.64487	0.243445	6.75664	1.41226e-11	1.42871e-09	2.08547	0.243035	4.46631	7.95805e-06	0.000625111	2.2272	0.243124	5.04762	4.47337e-07	2.5637e-05	2.14273	0.24307	4.70123	2.58594e-06	8.24241e-05	2.60832	0.243413	6.6074	3.91138e-11	1.03893e-09	HERPUD family member 2 [Source:HGNC Symbol;Acc:HGNC:21915]
ENSSSCG00000014073	HEXB	Myeloid	2635.87	2.84621	0.284037	6.49991	8.03669e-11	2.14447e-09	2.4644	0.283791	5.16013	2.46776e-07	3.00942e-06	4.48991	0.286268	12.1911	3.46896e-34	3.54016e-32	4.28755	0.28584	11.5013	1.29881e-30	1.04933e-28	3.45994	0.284595	8.64364	5.44494e-18	1.96119e-16	4.36938	0.286006	11.7808	4.90406e-32	4.45733e-30	4.90294	0.362614	10.7634	5.12684e-27	7.55008e-25	hexosaminidase subunit beta [Source:HGNC Symbol;Acc:HGNC:4879]
ENSSSCG00000037682	HFE	Myeloid	273.333	5.93267	0.498378	9.89744	4.27056e-23	4.10609e-21	7.04514	0.53463	11.3071	1.20968e-29	1.34033e-27	7.84378	0.580659	11.7862	4.59713e-32	3.98041e-30	7.6553	0.567795	11.7213	9.91303e-32	8.8714e-30	7.6553	0.567795	11.7213	9.91303e-32	8.60658e-30	8.39068	0.626657	11.7938	4.20081e-32	3.84821e-30	6.16232	0.660327	7.81782	5.37456e-15	2.24113e-13	hemochromatosis [Source:HGNC Symbol;Acc:HGNC:4886]
ENSSSCG00000007700	HIP1	Myeloid	336	6.79139	1.21226	4.77735	1.77623e-06	2.4689e-05	9.96435	1.35824	6.59998	4.1122e-11	8.11489e-10	7.22297	1.21897	5.10509	3.3064e-07	3.70584e-06	9.44319	1.3103	6.44372	1.16583e-10	1.97428e-09	8.37968	1.2504	5.90184	3.59471e-09	5.26048e-08	9.12714	1.28803	6.30973	2.79526e-10	4.51667e-09	11.2146	2.08288	4.90408	9.38682e-07	1.32051e-05	huntingtin interacting protein 1 [Source:HGNC Symbol;Acc:HGNC:4913]
ENSSSCG00000014048	HK3	Myeloid	3551.33	4.78053	0.384206	9.83985	7.58217e-23	7.2304e-21	4.66534	0.384052	9.54387	1.37595e-21	8.08477e-20	3.61479	0.383088	6.82556	8.75853e-12	1.6677e-10	4.12356	0.383469	8.14553	3.77624e-16	1.10941e-14	2.60674	0.382635	4.19914	2.67932e-05	0.000228027	4.10217	0.38345	8.09017	5.95831e-16	1.66232e-14	5.54687	0.484144	9.39157	5.91143e-21	5.09434e-19	hexokinase 3 [Source:HGNC Symbol;Acc:HGNC:4925]
ENSSSCG00000039745	HMOX1	Myeloid	608.4	4.15016	0.682301	4.61696	3.894e-06	5.11896e-05	5.72282	0.688612	6.85846	6.96059e-12	1.56937e-10	8.86253	0.758744	10.3626	3.67025e-25	2.05287e-23	9.08072	0.770935	10.4817	1.04833e-25	6.09813e-24	9.36985	0.789813	10.5973	3.06859e-26	1.86911e-24	11.429	1.06589	9.78434	1.31444e-22	6.14144e-21	6.46262	0.886295	6.16343	7.11861e-10	1.59265e-08	heme oxygenase 1 [Source:RefSeq peptide;Acc:NP_001004027]
ENSSSCG00000035195	HNMT	Myeloid	1560.87	9.90977	0.515103	17.2971	4.94971e-67	6.39832e-64	8.42667	0.457749	16.2243	3.39297e-59	2.07757e-56	7.66994	0.443677	15.0333	4.44211e-51	1.09956e-48	10.4922	0.555466	17.0888	1.79894e-65	8.04955e-63	8.84621	0.469065	16.7273	8.28586e-63	4.01657e-60	8.47041	0.458792	16.2828	1.30814e-59	5.85342e-57	9.41464	0.638961	13.1693	1.31893e-39	4.94983e-37	histamine N-methyltransferase [Source:RefSeq peptide;Acc:NP_001231490]
ENSSSCG00000032369	HSD3B7	Myeloid	244.933	3.10021	0.428573	4.90046	9.56117e-07	1.39217e-05	4.70861	0.446245	8.31069	9.51506e-17	3.57091e-15	2.93488	0.427617	4.5248	6.04541e-06	5.52492e-05	4.047	0.436671	6.97778	2.99878e-12	6.00479e-11	3.6032	0.432236	6.02263	1.71607e-09	2.62694e-08	3.44232	0.430927	5.66759	1.44818e-08	1.95454e-07	3.8686	0.554472	5.17358	2.29654e-07	3.52946e-06	hydroxy-delta-5-steroid dehydrogenase, 3 beta- and steroid delta-isomerase 7 [Source:HGNC Symbol;Acc:HGNC:18324]
ENSSSCG00000010459	HTR7	Myeloid	112.2	5.22437	0.760911	5.55173	2.82861e-08	5.38593e-07	4.50255	0.747932	4.68297	2.82741e-06	2.94486e-05	8.70455	1.03847	7.41912	1.179e-13	2.63273e-12	12.0651	1.61571	6.84845	7.4657e-12	1.43801e-10	9.63313	1.2534	6.88775	5.66804e-12	1.14682e-10	12.0651	1.61571	6.84845	7.4657e-12	1.42621e-10	7.39441	1.17873	5.42482	5.80115e-08	9.80967e-07	5-hydroxytryptamine receptor 7 [Source:RefSeq peptide;Acc:NP_999250]
ENSSSCG00000013655	ICAM1	Myeloid	612.867	3.78507	0.531338	5.24162	1.59175e-07	2.67607e-06	3.75541	0.531268	5.18648	2.14304e-07	2.62997e-06	8.20404	0.597485	12.0573	1.77566e-33	1.75068e-31	6.90653	0.557269	10.5991	3.01014e-26	1.81451e-24	7.56925	0.573696	11.4507	2.33127e-30	1.84504e-28	9.01961	0.645308	12.4276	1.85188e-35	2.11223e-33	6.9729	0.717163	8.32852	8.18612e-17	4.55737e-15	intercellular adhesion molecule 1 precursor [Source:RefSeq peptide;Acc:NP_998981]
ENSSSCG00000010452	IFIT1	Myeloid	2782.6	2.98907	0.297777	6.67974	2.39373e-11	6.84242e-10	3.43228	0.298296	8.15392	3.52328e-16	1.25351e-14	2.3949	0.297289	4.69208	2.70443e-06	2.60243e-05	1.84336	0.296984	2.83974	0.00451503	0.0251209	2.13958	0.297133	3.83525	0.000125438	0.000965177	2.51535	0.297372	5.09581	3.47261e-07	3.83669e-06	2.48635	0.373284	3.98183	6.8387e-05	0.000671972	interferon-induced protein with tetratricopeptide repeats 1 [Source:RefSeq peptide;Acc:NP_001231292]
ENSSSCG00000010451	IFIT2	Myeloid	1514.27	6.41536	0.565208	9.58118	9.59457e-22	8.39273e-20	6.94213	0.568662	10.4493	1.47591e-25	1.25334e-23	5.73704	0.562251	8.42514	3.60333e-17	1.09455e-15	4.97614	0.560222	7.09743	1.27094e-12	2.66897e-11	4.84349	0.559965	6.8638	6.70513e-12	1.34264e-10	5.35549	0.561101	7.7624	8.33392e-15	2.0941e-13	6.48903	0.713137	7.69702	1.3928e-14	5.47427e-13	interferon-induced protein with tetratricopeptide repeats 2 [Source:RefSeq peptide;Acc:NP_001302587]
ENSSSCG00000010454	IFIT5	Myeloid	352.6	5.69414	0.742788	6.31962	2.62206e-10	6.56022e-09	5.65922	0.742405	6.27585	3.47736e-10	6.21438e-09	5.68947	0.742737	6.31377	2.72318e-10	4.47471e-09	4.51334	0.733779	4.788	1.68448e-06	1.66644e-05	4.48382	0.733634	4.74872	2.04705e-06	2.07813e-05	6.61343	0.756907	7.41628	1.20459e-13	2.71592e-12	6.7781	0.973492	5.93543	2.93076e-09	5.89904e-08	interferon-induced protein with tetratricopeptide repeats 5 [Source:RefSeq peptide;Acc:NP_001302501]
ENSSSCG00000004156	IFNGR1	Myeloid	2297.27	3.16316	0.258905	8.35504	6.54109e-17	3.42789e-15	2.80483	0.258515	6.98153	2.91989e-12	6.90447e-11	3.37078	0.259179	9.14728	5.83853e-20	2.21979e-18	3.53678	0.259428	9.77836	1.39446e-22	6.67622e-21	3.28112	0.259056	8.8055	1.30266e-18	4.97241e-17	3.79986	0.259886	10.7734	4.5955e-27	2.92153e-25	2.94452	0.324672	5.98921	2.10869e-09	4.34973e-08	interferon gamma receptor 1 precursor [Source:RefSeq peptide;Acc:NP_001171378]
ENSSSCG00000011795	IGF2BP2	NK	123.667	4.34664	0.99363	3.36809	0.000756897	0.0211676	12.3092	1.74573	6.47818	9.2834e-11	5.14301e-09	5.68753	1.00977	4.6422	3.44718e-06	0.000128129	4.78142	0.997354	3.79145	0.00014977	0.00717046	4.94692	0.99909	3.95052	7.79829e-05	0.00246536	5.7354	1.01066	4.68547	2.79325e-06	8.80668e-05	5.69607	1.00992	4.64994	3.32038e-06	4.29215e-05	insulin like growth factor 2 mRNA binding protein 2 [Source:HGNC Symbol;Acc:HGNC:28867]
ENSSSCG00000027967	IGSF6	Myeloid	786.333	8.40948	0.931714	7.95253	1.82737e-15	8.27223e-14	11.339	1.11975	9.2333	2.6243e-20	1.40696e-18	8.56617	0.93535	8.08913	6.00934e-16	1.67656e-14	12.6692	1.38426	8.42986	3.46072e-17	1.11839e-15	9.85415	0.984612	8.99253	2.41605e-19	9.62615e-18	11.8716	1.20407	9.02903	1.73207e-19	6.18127e-18	12.249	1.83928	6.11596	9.59745e-10	2.11471e-08	immunoglobulin superfamily member 6 [Source:RefSeq peptide;Acc:NP_001230316]
ENSSSCG00000012633	IL13RA1	Myeloid	2360.13	5.55253	0.749138	6.07702	1.22437e-09	2.78209e-08	9.95015	0.785731	11.3909	4.64372e-30	5.34901e-28	10.1027	0.789902	11.5239	1.00024e-30	8.0254e-29	10.5686	0.805546	11.8785	1.53174e-32	1.40317e-30	10.7641	0.813649	12.0004	3.53411e-33	3.30724e-31	10.7323	0.812261	11.9818	4.42619e-33	4.32725e-31	9.98863	1.0077	8.91998	4.66363e-19	3.2489e-17	interleukin-13 receptor subunit alpha-1 precursor [Source:RefSeq peptide;Acc:NP_999506]
ENSSSCG00000028331	IL1R2	Myeloid	129.933	9.28125	3.01143	2.74994	0.00596068	0.0388279	12.3481	3.23619	3.50662	0.000453833	0.00329787	10.936	3.22592	3.08005	0.00206962	0.0124951	12.3481	3.23619	3.50662	0.000453833	0.00303442	10.936	3.22592	3.08005	0.00206962	0.0127803	9.80429	3.06011	2.87711	0.00401334	0.0231603	12.4729	4.18712	2.74003	0.0061433	0.0386958	interleukin-1 receptor type 2 precursor [Source:RefSeq peptide;Acc:NP_001230292]
ENSSSCG00000021206	IL1RAP	Myeloid	276	2.88575	0.303907	6.20504	5.46843e-10	1.30102e-08	2.87853	0.303842	6.18259	6.30589e-10	1.08606e-08	2.21542	0.299044	4.06435	4.81665e-05	0.000390773	3.11047	0.306087	6.89502	5.38562e-12	1.0566e-10	1.98002	0.297793	3.29094	0.000998539	0.00656328	2.41149	0.300248	4.7011	2.58769e-06	2.56651e-05	2.62889	0.38259	4.25753	2.06698e-05	0.000224531	interleukin 1 receptor accessory protein [Source:HGNC Symbol;Acc:HGNC:5995]
ENSSSCG00000016420	INSIG1	Myeloid	1284	2.91258	0.268838	7.11424	1.12529e-12	3.59661e-11	2.66961	0.268394	6.22073	4.94855e-10	8.64435e-09	2.76002	0.268551	6.55377	5.61041e-11	9.90464e-10	3.27661	0.269656	8.44265	3.10225e-17	1.00534e-15	3.45802	0.270147	9.09882	9.132e-20	3.86333e-18	2.93069	0.268874	7.18067	6.93706e-13	1.46206e-11	2.01894	0.335949	3.03301	0.00242128	0.0170516	insulin-induced gene 1 protein [Source:RefSeq peptide;Acc:NP_001231450]
ENSSSCG00000006465	INSRR	NK	203.2	6.93796	0.754309	7.87206	3.48846e-15	2.53654e-12	13.4287	1.6106	7.71678	1.19303e-14	1.12843e-12	9.74755	0.963769	9.0764	1.12226e-19	3.95647e-17	3.58294	0.719711	3.58885	0.000332134	0.0136539	9.069	0.877492	9.19552	3.73194e-20	1.40056e-17	8.9633	0.866817	9.18682	4.04618e-20	1.56911e-17	9.42016	0.918038	9.17191	4.64696e-20	3.62837e-18	insulin receptor related receptor [Source:HGNC Symbol;Acc:HGNC:6093]
ENSSSCG00000017204	ITGB4	Myeloid	35.8	4.29531	1.05208	3.1322	0.00173503	0.012836	5.8688	1.12541	4.32626	1.51665e-05	0.00014026	6.84398	1.22175	4.78329	1.72449e-06	1.73104e-05	8.19792	1.48009	4.86317	1.15522e-06	1.1697e-05	6.40553	1.17163	4.6137	3.9557e-06	3.83505e-05	6.06304	1.14046	4.43948	9.01771e-06	8.28035e-05	7.51051	1.93073	3.37204	0.000746143	0.00584554	integrin subunit beta 4 [Source:HGNC Symbol;Acc:HGNC:6158]
ENSSSCG00000015089	JAML	CD8T	1.10944e-35	2.63413e-33	5.72068e-22	2.21848e-18	4.8279e-17	3.67178e-14	2.11734e-12	7.31409e-11	1.46626e-10	2.93421e-08	5.5575e-06	5.5716e-06	5.06311e-05	0.000281826	0.426871	0.426871	0.427326	0.427496	0.428098	0.432539	0.543957	2.93886	2.93909	3.78363	4.00381	4.54203	4.54256	4.59209	6.24071	6.3931	6.51407	7.02653	8.39081	9.63443	12.4685	3176.27	junctional adhesion molecule-like precursor [Source:RefSeq peptide;Acc:NP_001231659]
ENSSSCG00000035895	JDP2	Myeloid	357.4	4.1216	0.691302	4.51553	6.3158e-06	7.90937e-05	6.6287	0.717937	7.8401	4.50172e-15	1.42318e-13	5.49914	0.700521	6.42256	1.34002e-10	2.27589e-09	5.45734	0.700096	6.36675	1.93071e-10	3.18608e-09	4.03748	0.690973	4.39595	1.10289e-05	9.99298e-05	7.96557	0.764515	9.11109	8.15575e-20	3.02178e-18	7.23227	0.926033	6.73007	1.69582e-11	4.69742e-10	Jun dimerization protein 2 [Source:HGNC Symbol;Acc:HGNC:17546]
ENSSSCG00000002014	JPH4	Myeloid	52.4667	4.57047	1.19574	2.98599	0.00282663	0.0199062	4.40918	1.19261	2.85858	0.00425536	0.0255091	11.0153	1.85458	5.40028	6.65369e-08	8.20011e-07	11.0153	1.85458	5.40028	6.65369e-08	8.08173e-07	6.28918	1.25983	4.19833	2.68895e-05	0.000228679	11.0153	1.85458	5.40028	6.65369e-08	8.1312e-07	10.3108	2.52132	3.69285	0.000221758	0.00196792	junctophilin 4 [Source:HGNC Symbol;Acc:HGNC:20156]
ENSSSCG00000029323	KCNE3	Myeloid	205.6	11.8005	1.61531	6.68636	2.28787e-11	6.57212e-10	9.35542	1.21161	6.89613	5.34365e-12	1.22619e-10	9.72024	1.25376	6.95529	3.51844e-12	6.91444e-11	13.2736	1.77684	6.90755	4.93084e-12	9.75601e-11	10.3974	1.35711	6.9246	4.3721e-12	8.92369e-11	9.05131	1.18232	6.80976	9.77636e-12	1.82859e-10	10.0249	1.96202	4.59981	4.22882e-06	5.37097e-05	potassium voltage-gated channel subfamily E member 3 [Source:RefSeq peptide;Acc:NP_999258]
ENSSSCG00000039556	KCNQ1	Myeloid	246.067	11.8955	1.6663	6.53872	6.20459e-11	1.69447e-09	13.3683	1.76979	6.98856	2.77728e-12	6.58632e-11	8.0574	1.09486	6.44592	1.14902e-10	1.97164e-09	8.93874	1.14893	6.90966	4.85808e-12	9.62843e-11	8.73518	1.13373	6.82275	8.9313e-12	1.74927e-10	10.564	1.36255	7.0192	2.23143e-12	4.49922e-11	7.62852	1.41673	4.67876	2.88622e-06	3.77284e-05	potassium voltage-gated channel subfamily Q member 1 [Source:HGNC Symbol;Acc:HGNC:6294]
ENSSSCG00000005762	KCNT1	Myeloid	282.733	3.37331	0.408337	5.81212	6.16863e-09	1.29308e-07	8.38056	0.592017	12.4668	1.13267e-35	1.99658e-33	6.68631	0.468539	12.1363	6.78595e-34	6.74768e-32	13.278	1.49739	8.19958	2.41229e-16	7.19604e-15	7.441	0.509708	12.6367	1.32581e-36	1.54245e-34	4.64243	0.418424	8.70512	3.1724e-18	1.03383e-16	9.72485	1.14064	7.6491	2.02388e-14	7.7709e-13	potassium sodium-activated channel subfamily T member 1 [Source:HGNC Symbol;Acc:HGNC:18865]
ENSSSCG00000002666	KIAA0513	Myeloid	993.8	3.57669	0.42906	6.00543	1.9083e-09	4.24497e-08	5.05363	0.435136	9.31577	1.2107e-20	6.64398e-19	2.54276	0.4273	3.61049	0.000305616	0.00217198	2.82334	0.427661	4.26352	2.01232e-05	0.000166866	2.81293	0.427647	4.23932	2.24197e-05	0.000192741	2.82693	0.427667	4.27186	1.93854e-05	0.000170602	3.25251	0.537756	4.18872	2.80536e-05	0.000295362	KIAA0513 [Source:HGNC Symbol;Acc:HGNC:29058]
ENSSSCG00000035093	KIF26A	NK	193.933	6.65435	1.09779	5.15068	2.5955e-07	2.15686e-05	7.8253	1.11975	6.09537	1.09185e-09	5.06078e-08	11.4213	1.48759	7.00548	2.46144e-12	2.83528e-10	4.95117	1.08539	3.64032	0.000272304	0.0117333	10.3874	1.29592	7.24379	4.3631e-13	6.67898e-11	7.0105	1.10275	5.45047	5.02363e-08	2.55218e-06	8.60375	1.14729	6.62758	3.41234e-11	9.1684e-10	kinesin family member 26A [Source:HGNC Symbol;Acc:HGNC:20226]
ENSSSCG00000012637	KLHL13	Myeloid	180.133	6.63014	0.857547	6.5654	5.18936e-11	1.43064e-09	6.4474	0.85253	6.38969	1.66221e-10	3.10403e-09	9.41586	1.07006	7.86485	3.69549e-15	9.57535e-14	12.9617	1.65644	7.22135	5.14743e-13	1.11935e-11	11.5734	1.56584	6.75255	1.45267e-11	2.77509e-10	7.01674	0.870314	6.9133	4.73491e-12	9.30507e-11	8.46248	1.32956	5.61276	1.99127e-08	3.58058e-07	kelch like family member 13 [Source:HGNC Symbol;Acc:HGNC:22931]
ENSSSCG00000009555	LAMP1	Myeloid	8775.53	2.71498	0.338194	5.071	3.95723e-07	6.19629e-06	3.04328	0.338276	6.04029	1.53835e-09	2.53501e-08	2.61372	0.338172	4.77189	1.82501e-06	1.82407e-05	2.11659	0.338085	3.30268	0.000957652	0.00613847	2.57483	0.338164	4.657	3.20851e-06	3.17413e-05	2.58951	0.338167	4.70036	2.59705e-06	2.5736e-05	2.54009	0.424027	3.63205	0.00028118	0.00243941	lysosome-associated membrane glycoprotein 1 precursor [Source:RefSeq peptide;Acc:NP_001011507]
ENSSSCG00000005055	LGALS3	Myeloid	697.533	7.27167	0.753347	8.32508	8.42716e-17	4.31901e-15	8.71763	0.788202	9.79144	1.22543e-22	7.92033e-21	8.06433	0.768343	9.19424	3.77658e-20	1.45006e-18	10.1262	0.872722	10.4571	1.35897e-25	7.8658e-24	8.09751	0.76916	9.22762	2.76716e-20	1.20573e-18	9.7274	0.84099	10.3775	3.13791e-25	1.74672e-23	10.2635	1.17209	7.90342	2.71351e-15	1.19128e-13	galectin-3 [Source:RefSeq peptide;Acc:NP_001090970]
ENSSSCG00000010146	LGALS8	Myeloid	1679.67	4.19124	0.449473	7.09994	1.24808e-12	3.95644e-11	4.0627	0.44925	6.81737	9.27194e-12	2.04687e-10	3.23883	0.448205	4.9951	5.8806e-07	6.33471e-06	3.91984	0.449024	6.50264	7.89207e-11	1.36331e-09	3.04234	0.448032	4.55847	5.15267e-06	4.93384e-05	3.26871	0.448233	5.06144	4.16098e-07	4.57984e-06	3.33858	0.56261	4.15666	3.2293e-05	0.000336834	galectin-8 [Source:RefSeq peptide;Acc:NP_001136299]
ENSSSCG00000040348	LIN7A	Myeloid	92.8667	5.85979	1.04847	4.63513	3.56709e-06	4.70516e-05	4.70658	1.02314	3.62274	0.000291503	0.00219505	7.36333	1.12863	5.63812	1.71917e-08	2.2806e-07	8.79627	1.31549	5.92649	3.09469e-09	4.39069e-08	6.64723	1.08092	5.22447	1.74651e-07	2.05865e-06	5.75786	1.04537	4.55138	5.32945e-06	5.05321e-05	4.98556	1.30892	3.04493	0.00232737	0.0164699	lin-7 homolog A, crumbs cell polarity complex component [Source:HGNC Symbol;Acc:HGNC:17787]
ENSSSCG00000010450	LIPA	Myeloid	8754.8	3.98503	0.497842	5.99593	2.02326e-09	4.4921e-08	4.39984	0.497974	6.82734	8.6502e-12	1.91324e-10	3.23332	0.497682	4.48744	7.20841e-06	6.51613e-05	3.15932	0.49767	4.33885	1.43227e-05	0.000122163	2.91409	0.497635	3.84637	0.000119881	0.000928558	3.56018	0.497741	5.14359	2.69539e-07	3.03938e-06	3.63226	0.624164	4.21726	2.47293e-05	0.00026296	lysosomal acid lipase/cholesteryl ester hydrolase precursor [Source:RefSeq peptide;Acc:NP_001116606]
ENSSSCG00000000625	LRP6	Myeloid	136.733	4.64285	0.67278	5.41462	6.14176e-08	1.10267e-06	3.89057	0.662725	4.36164	1.29089e-05	0.000120435	4.12761	0.665363	4.70062	2.59378e-06	2.51257e-05	5.29657	0.686715	6.25669	3.93229e-10	6.2158e-09	4.43017	0.669405	5.12421	2.98796e-07	3.41137e-06	4.05052	0.664458	4.59099	4.41157e-06	4.24869e-05	6.29462	0.932882	5.67555	1.38246e-08	2.54084e-07	LDL receptor related protein 6 [Source:HGNC Symbol;Acc:HGNC:6698]
ENSSSCG00000008701	LRPAP1	Myeloid	1422.73	2.712	0.385913	4.43624	9.15422e-06	0.000110822	3.21262	0.386524	5.7244	1.03802e-08	1.52094e-07	3.32862	0.386698	6.02181	1.72477e-09	2.59251e-08	2.97701	0.38621	5.11899	3.07168e-07	3.33358e-06	3.25702	0.386589	5.8383	5.27367e-09	7.5559e-08	2.95253	0.38618	5.05602	4.28102e-07	4.7075e-06	3.20077	0.485527	4.53275	5.82198e-06	7.15236e-05	alpha-2-macroglobulin receptor-associated protein precursor [Source:RefSeq peptide;Acc:NP_001106907]
ENSSSCG00000036963	LRRC25	Myeloid	995.867	2.95701	0.481543	4.06403	4.82327e-05	0.0005069	3.76897	0.482616	5.73743	9.61253e-09	1.41919e-07	6.40874	0.49546	10.9166	9.60206e-28	6.42014e-26	7.3221	0.508616	12.43	1.79638e-35	1.99039e-33	5.99665	0.491695	10.1621	2.92692e-24	1.60622e-22	8.42717	0.539517	13.7663	4.06261e-43	7.16127e-41	4.96524	0.611881	6.48042	9.14701e-11	2.3235e-09	leucine rich repeat containing 25 [Source:HGNC Symbol;Acc:HGNC:29806]
ENSSSCG00000027911	LTB4R	Myeloid	52.9333	4.90681	1.20261	3.24861	0.0011597	0.00903677	8.26301	1.50795	4.81647	1.46122e-06	1.60225e-05	4.76388	1.19895	3.13932	0.00169341	0.0103964	6.46166	1.27454	4.28521	1.82564e-05	0.000152582	4.35107	1.19013	2.81572	0.00486679	0.0279882	5.56112	1.22454	3.72476	0.000195498	0.00146454	8.89383	2.05624	3.83897	0.000123553	0.00114352	leukotriene B4 receptor [Source:HGNC Symbol;Acc:HGNC:6713]
ENSSSCG00000000706	LTBR	Myeloid	559.067	5.4684	0.547001	8.1689	3.11207e-16	1.52767e-14	11.0129	0.899242	11.1348	8.49258e-29	9.1484e-27	9.88605	0.725866	12.242	1.85419e-34	1.97905e-32	13.0067	1.50259	7.99068	1.34192e-15	3.73491e-14	11.046	0.905927	11.0892	1.41526e-28	1.00397e-26	10.6824	0.838009	11.554	7.04444e-31	5.93877e-29	10.2693	1.08295	8.55927	1.13584e-17	6.91852e-16	tumor necrosis factor receptor superfamily member 3 precursor [Source:RefSeq peptide;Acc:NP_001295752]
ENSSSCG00000037524	LY6D	NK	493.067	6.19888	0.982551	5.2912	1.21514e-07	1.14008e-05	9.24293	1.02492	8.04249	8.80301e-16	9.57142e-14	12.7404	1.25195	9.37769	6.74327e-21	2.80183e-18	5.56785	0.980109	4.66055	3.1536e-06	0.000298284	12.4618	1.21998	9.395	5.72194e-21	2.66276e-18	6.30577	0.983075	5.39711	6.77213e-08	3.24226e-06	5.15904	0.978996	4.24827	2.15428e-05	0.000232926	lymphocyte antigen 6 family member D [Source:HGNC Symbol;Acc:HGNC:13348]
ENSSSCG00000040835	MANSC1	Myeloid	99.9333	5.25955	1.25864	3.38424	0.000713746	0.00584769	11.896	1.89965	5.73581	9.70468e-09	1.42917e-07	6.05193	1.27507	3.96207	7.43017e-05	0.000584467	7.15492	1.31867	4.66753	3.04849e-06	2.89519e-05	5.44272	1.2617	3.52122	0.000429559	0.00299969	9.44066	1.59965	5.27657	1.31622e-07	1.54675e-06	11.8659	2.5689	4.2298	2.33901e-05	0.000251407	MANSC domain containing 1 [Source:HGNC Symbol;Acc:HGNC:25505]
ENSSSCG00000004520	MAPK4	Myeloid	207.533	7.53415	1.18756	5.50217	3.75149e-08	6.99436e-07	8.54434	1.24163	6.07618	1.23076e-09	2.04261e-08	11.538	1.829	5.76161	8.33166e-09	1.14253e-07	7.93938	1.20511	5.75829	8.49712e-09	1.13758e-07	10.5486	1.52552	6.25929	3.8673e-10	6.37282e-09	5.28861	1.14372	3.74969	0.000177054	0.0013367	6.86104	1.48709	3.94129	8.10459e-05	0.000779246	mitogen-activated protein kinase 4 [Source:HGNC Symbol;Acc:HGNC:6878]
ENSSSCG00000011415	MAPKAPK3	Myeloid	2512.53	2.38446	0.18893	7.3279	2.33792e-13	8.04714e-12	2.7687	0.189473	9.33482	1.01162e-20	5.58014e-19	2.44921	0.189012	7.6673	1.75658e-14	4.26855e-13	2.19697	0.188712	6.34285	2.25551e-10	3.67001e-09	2.02029	0.188531	5.41177	6.24037e-08	7.8487e-07	2.03898	0.188549	5.51039	3.58035e-08	4.56731e-07	2.2181	0.237109	5.13728	2.78738e-07	4.23347e-06	MAP kinase-activated protein kinase 3 [Source:RefSeq peptide;Acc:NP_001137189]
ENSSSCG00000010826	MARC2	Myeloid	88.6667	4.70925	0.841779	4.40644	1.05082e-05	0.000125903	4.72387	0.842068	4.42229	9.76618e-06	9.27508e-05	5.55462	0.864056	5.27121	1.35525e-07	1.58462e-06	7.30523	0.973629	6.47601	9.41821e-11	1.61135e-09	6.76757	0.926835	6.22286	4.88166e-10	7.94311e-09	4.39601	0.83622	4.06114	4.88328e-05	0.000401499	4.76637	1.07931	3.48961	0.000483734	0.00396601	mitochondrial amidoxime reducing component 2 [Source:HGNC Symbol;Acc:HGNC:26064]
ENSSSCG00000003267	MBOAT7	Myeloid	1553.13	2.06051	0.371345	2.85585	0.00429214	0.0288307	2.92119	0.372228	5.16133	2.45201e-07	2.99336e-06	3.03331	0.372387	5.4602	4.7561e-08	5.95681e-07	2.32957	0.371567	3.57827	0.000345875	0.00237119	2.6589	0.371902	4.46058	8.17386e-06	7.54719e-05	2.11595	0.371387	3.00481	0.00265747	0.0159613	2.73307	0.46685	3.71227	0.000205411	0.00183685	membrane bound O-acyltransferase domain containing 7 [Source:HGNC Symbol;Acc:HGNC:15505]
ENSSSCG00000021158	MCF2L	Myeloid	325	5.23665	0.739427	5.72964	1.00643e-08	2.05419e-07	10.1204	1.02446	8.90263	5.45381e-19	2.5484e-17	7.21558	0.773775	8.0328	9.52693e-16	2.60791e-14	6.74397	0.761128	7.54666	4.46574e-14	1.08464e-12	7.50228	0.783599	8.29797	1.05908e-16	3.55081e-15	5.95906	0.747155	6.63726	3.19573e-11	5.6762e-10	8.42895	1.08987	6.81638	9.3365e-12	2.67539e-10	MCF.2 cell line derived transforming sequence like [Source:HGNC Symbol;Acc:HGNC:14576]
ENSSSCG00000025286	MCTP1	Myeloid	166.267	7.11869	1.04708	5.8436	5.10839e-09	1.08451e-07	12.6598	1.74819	6.66964	2.56432e-11	5.22475e-10	6.38432	1.02366	5.25986	1.44165e-07	1.67722e-06	6.85483	1.03733	5.64413	1.66015e-08	2.14602e-07	6.27135	1.02097	5.16308	2.42923e-07	2.8121e-06	12.6598	1.74819	6.66964	2.56432e-11	4.62532e-10	6.45479	1.30878	4.16785	3.0749e-05	0.000321992	multiple C2 and transmembrane domain containing 1 [Source:HGNC Symbol;Acc:HGNC:26183]
ENSSSCG00000008103	MERTK	Myeloid	90.4	10.42	2.04103	4.6153	3.92524e-06	5.1542e-05	7.32748	1.55	4.08225	4.46021e-05	0.000382389	7.3301	1.55014	4.08355	4.43524e-05	0.000361595	9.34295	1.77597	4.69768	2.63139e-06	2.51343e-05	8.79277	1.68455	4.62604	3.72728e-06	3.63785e-05	8.88775	1.69826	4.64461	3.4072e-06	3.32824e-05	11.9617	2.76106	3.97011	7.1839e-05	0.000699711	MER proto-oncogene, tyrosine kinase [Source:HGNC Symbol;Acc:HGNC:7027]
ENSSSCG00000037697	MGP	Myeloid	129.267	4.71545	0.954174	3.89389	9.86489e-05	0.000969325	6.62347	0.996964	5.64059	1.69464e-08	2.40139e-07	6.82693	1.00549	5.79512	6.82732e-09	9.46711e-08	8.5705	1.14466	6.61375	3.74715e-11	6.65563e-10	9.99788	1.41946	6.33896	2.31315e-10	3.87769e-09	7.15066	1.02153	6.02101	1.73336e-09	2.60879e-08	7.43214	1.38841	4.63273	3.60881e-06	4.6341e-05	Matrix Gla protein [Source:UniProtKB/Swiss-Prot;Acc:Q8MJ39]
ENSSSCG00000011514	MITF	Myeloid	384.533	5.72869	0.453964	10.4164	2.08628e-25	2.37958e-23	3.44383	0.43165	5.66161	1.4996e-08	2.14593e-07	4.026	0.43458	6.96305	3.32987e-12	6.58839e-11	4.47957	0.437816	7.94757	1.90207e-15	5.21902e-14	6.01146	0.45985	10.898	1.178e-27	7.69933e-26	4.81231	0.440905	8.64656	5.30766e-18	1.70578e-16	4.9654	0.559699	7.08488	1.39168e-12	4.36409e-11	Sus scrofa microphthalmia-associated transcription factor-like (LOC102167244), mRNA. [Source:RefSeq mRNA;Acc:NM_001315782]
ENSSSCG00000000368	MMP19	Myeloid	109.267	10.6734	1.65816	5.8338	5.41788e-09	1.14603e-07	8.3334	1.07263	6.83686	8.09462e-12	1.80063e-10	9.04475	1.18899	6.76602	1.32376e-11	2.45624e-10	9.11716	1.20354	6.74443	1.53625e-11	2.85051e-10	9.69386	1.34077	6.48421	8.91992e-11	1.56522e-09	8.3334	1.07263	6.83686	8.09462e-12	1.53877e-10	8.76934	1.50543	5.16086	2.45813e-07	3.75794e-06	matrix metallopeptidase 19 [Source:HGNC Symbol;Acc:HGNC:7165]
ENSSSCG00000012822	MPP1	Myeloid	2964.33	3.52849	0.287937	8.78142	1.61427e-18	1.02625e-16	4.56901	0.289713	12.3191	7.14798e-35	1.22294e-32	2.88315	0.287328	6.55401	5.60127e-11	9.90352e-10	2.59852	0.287135	5.56712	2.58977e-08	3.28207e-07	2.65176	0.287168	5.75188	8.82573e-09	1.23709e-07	2.7223	0.287214	5.99657	2.01533e-09	3.00594e-08	3.1639	0.361032	5.99364	2.05191e-09	4.27096e-08	membrane palmitoylated protein 1 [Source:HGNC Symbol;Acc:HGNC:7219]
ENSSSCG00000027443	MRAS	Myeloid	223.533	5.55048	0.752208	6.0495	1.45298e-09	3.27596e-08	11.6807	1.58808	6.7255	1.74987e-11	3.64838e-10	13.1288	1.61786	7.49682	6.5384e-14	1.50331e-12	13.1288	1.61786	7.49682	6.5384e-14	1.56197e-12	10.1391	1.11693	8.18235	2.78356e-16	8.9212e-15	10.6632	1.2484	7.74046	9.90589e-15	2.46778e-13	10.5582	1.7273	5.53362	3.13684e-08	5.48783e-07	muscle RAS oncogene homolog [Source:HGNC Symbol;Acc:HGNC:7227]
ENSSSCG00000017300	MRC2	Myeloid	533.133	5.92049	0.589683	8.34429	7.16403e-17	3.7375e-15	10.6114	0.869247	11.0571	2.02429e-28	2.14096e-26	7.64318	0.62218	10.6773	1.30052e-26	8.0054e-25	8.63956	0.664959	11.4888	1.50245e-30	1.19722e-28	9.40515	0.719849	11.6763	1.68524e-31	1.4311e-29	8.63644	0.664781	11.4871	1.53083e-30	1.24458e-28	6.51787	0.754153	7.31664	2.54257e-13	8.5989e-12	mannose receptor C type 2 [Source:HGNC Symbol;Acc:HGNC:16875]
ENSSSCG00000034506	MS4A2	Myeloid	7160.8	5.21565	0.70887	5.947	2.73099e-09	5.97224e-08	11.4842	0.747183	14.0317	9.97822e-45	3.05491e-42	9.20018	0.716502	11.4447	2.49855e-30	1.95088e-28	12.6881	0.794904	14.7038	6.09038e-49	1.41711e-46	10.0829	0.723305	12.5575	3.61631e-36	4.00687e-34	11.4578	0.746497	14.0092	1.36984e-44	2.65611e-42	13.0042	1.06781	11.2419	2.53771e-29	4.54211e-27	high affinity immunoglobulin epsilon receptor subunit beta [Source:RefSeq peptide;Acc:NP_999257]
ENSSSCG00000039761	MYCL	Myeloid	259.2	3.41839	0.712085	3.39621	0.000683268	0.00562572	8.39241	0.841823	8.78143	1.61405e-18	7.13985e-17	8.93527	0.896406	8.85231	8.57245e-19	2.98599e-17	10.6921	1.23378	7.85556	3.97982e-15	1.06196e-13	7.21937	0.770012	8.07698	6.63922e-16	2.04341e-14	10.0962	1.0849	8.38436	5.10014e-17	1.52141e-15	3.81985	0.908978	3.10222	0.00192075	0.0138365	MYCL proto-oncogene, bHLH transcription factor [Source:HGNC Symbol;Acc:HGNC:7555]
ENSSSCG00000022687	NAA40	NK	1129.47	2.52892	0.291831	5.23905	1.61408e-07	1.4786e-05	3.82591	0.29457	9.59333	8.52874e-22	1.87214e-19	3.27987	0.293117	7.77802	7.36665e-15	1.29854e-12	2.26786	0.291519	4.34914	1.36675e-05	0.00095214	3.16842	0.292882	7.40373	1.32407e-13	2.20061e-11	2.14527	0.29139	3.93036	8.48196e-05	0.00188679	2.76936	0.292173	6.05585	1.39682e-09	3.00382e-08	N(alpha)-acetyltransferase 40, NatD catalytic subunit [Source:HGNC Symbol;Acc:HGNC:25845]
ENSSSCG00000040967	NACC2	Myeloid	448.533	8.77593	1.97078	3.94562	7.95935e-05	0.000796209	11.5873	2.15636	4.90982	9.11606e-07	1.0247e-05	10.2444	2.02788	4.55864	5.14863e-06	4.73886e-05	14.2793	2.41543	5.4977	3.84782e-08	4.79802e-07	10.1172	2.02048	4.51241	6.40956e-06	6.0282e-05	10.8824	2.07569	4.761	1.92636e-06	1.93702e-05	11.3553	2.83722	3.64981	0.000262433	0.0022924	NACC family member 2 [Source:HGNC Symbol;Acc:HGNC:23846]
ENSSSCG00000038967	NADK	Myeloid	2525.6	1.60573	0.205417	2.94876	0.0031905	0.0221866	1.60693	0.205418	2.95463	0.00313049	0.0192597	2.50237	0.206295	7.28263	3.27372e-13	7.04002e-12	2.10351	0.205837	5.36108	8.27267e-08	9.86109e-07	2.63423	0.206476	7.9149	2.4746e-15	7.19607e-14	2.5889	0.206412	7.69774	1.38492e-14	3.39919e-13	2.18077	0.258582	4.56632	4.9635e-06	6.19586e-05	NAD kinase [Source:HGNC Symbol;Acc:HGNC:29831]
ENSSSCG00000008316	NAGK	Myeloid	2257.4	3.6569	0.256354	10.3642	3.60751e-25	4.03556e-23	3.80469	0.256595	10.9304	8.24878e-28	8.3449e-26	3.99864	0.256952	11.67	1.81385e-31	1.50731e-29	3.97377	0.256904	11.5754	5.49086e-31	4.62904e-29	3.87426	0.256718	11.1962	4.25667e-29	3.15428e-27	3.33136	0.2559	9.11043	8.20591e-20	3.03072e-18	3.81446	0.322809	8.71867	2.81498e-18	1.78959e-16	N-acetylglucosamine kinase [Source:HGNC Symbol;Acc:HGNC:17174]
ENSSSCG00000010915	NAV1	Myeloid	645.133	3.53229	0.746811	3.3908	0.000696891	0.00572807	4.53481	0.74874	4.72102	2.3467e-06	2.48196e-05	9.12168	0.832601	9.75459	1.76312e-22	8.30452e-21	10.017	0.901229	10.0052	1.44528e-23	7.27895e-22	7.87803	0.783129	8.78275	1.59522e-18	6.04522e-17	10.4433	0.949038	9.95039	2.51197e-23	1.22791e-21	4.69677	0.94651	3.90568	9.39589e-05	0.000892341	neuron navigator 1 [Source:HGNC Symbol;Acc:HGNC:15989]
ENSSSCG00000015045	NCAM1	Myeloid	79.5333	10.308	1.83766	5.06514	4.08102e-07	6.36244e-06	8.00786	1.47013	4.76683	1.87152e-06	2.02166e-05	10.4855	1.86645	5.08208	3.73331e-07	4.1444e-06	9.67969	1.73554	5.00116	5.6987e-07	5.9514e-06	8.90509	1.58202	4.99684	5.82772e-07	6.38416e-06	11.8313	1.95598	5.53755	3.06729e-08	3.94308e-07	11.2256	2.65057	3.85789	0.000114371	0.00106461	neural cell adhesion molecule 1 [Source:HGNC Symbol;Acc:HGNC:7656]
ENSSSCG00000015559	NCF2	Myeloid	2414.8	2.93074	0.260654	7.40728	1.28915e-13	4.64332e-12	2.83678	0.260572	7.04902	1.80179e-12	4.36709e-11	4.05187	0.262177	11.6405	2.5644e-31	2.101e-29	3.96634	0.262015	11.3213	1.02952e-29	7.77754e-28	4.34409	0.262807	12.7245	4.32157e-37	5.0785e-35	3.45119	0.261218	9.38369	6.3702e-21	2.6374e-19	5.7622	0.339878	14.0115	1.32615e-44	6.708e-42	neutrophil cytosol factor 2 [Source:RefSeq peptide;Acc:NP_001116614]
ENSSSCG00000037425	NFAM1	Myeloid	418.667	8.90552	2.32029	3.40712	0.000656527	0.00543246	14.0525	2.70284	4.82917	1.37101e-06	1.50759e-05	10.0243	2.36028	3.82341	0.000131617	0.000994955	14.0525	2.70284	4.82917	1.37101e-06	1.3703e-05	9.65051	2.34345	3.69136	0.000223056	0.00164035	11.5776	2.49839	4.23376	2.29815e-05	0.000199528	14.0076	3.53098	3.68385	0.000229733	0.00202632	NFAT activating protein with ITAM motif 1 [Source:HGNC Symbol;Acc:HGNC:29872]
ENSSSCG00000000289	NFE2	Myeloid	555	4.21983	0.448908	7.17259	7.35898e-13	2.4049e-11	9.33518	0.607337	13.7241	7.27893e-43	2.01626e-40	7.39653	0.491592	13.0118	1.0478e-38	1.41745e-36	9.39579	0.613375	13.6879	1.19986e-42	1.91222e-40	6.58693	0.471492	11.8495	2.16563e-32	1.98385e-30	8.30116	0.529981	13.7763	3.54139e-43	6.33855e-41	10.7594	1.16461	8.37995	5.29514e-17	3.03466e-15	transcription factor NF-E2 45 kDa subunit [Source:RefSeq peptide;Acc:NP_001172081]
ENSSSCG00000037791	NKD2	Myeloid	141.6	5.16429	1.07135	3.88697	0.000101503	0.00099401	12.4102	1.78658	6.38662	1.69588e-10	3.15679e-09	7.9642	1.17051	5.94974	2.68573e-09	3.90084e-08	12.4102	1.78658	6.38662	1.69588e-10	2.82663e-09	10.9681	1.78539	5.58316	2.36181e-08	3.12242e-07	5.35317	1.07378	4.05407	5.03336e-05	0.000412672	6.50159	1.40971	3.90265	9.51434e-05	0.000901648	naked cuticle homolog 2 [Source:HGNC Symbol;Acc:HGNC:17046]
ENSSSCG00000003251	NLRP12	Myeloid	198.4	11.4304	1.72332	6.0525	1.42614e-09	3.22168e-08	10.0553	1.44683	6.25871	3.88183e-10	6.87386e-09	7.32	1.17415	5.38263	7.34069e-08	8.93323e-07	10.0553	1.44683	6.25871	3.88183e-10	6.15276e-09	11.4304	1.72332	6.0525	1.42614e-09	2.19757e-08	6.96663	1.16165	5.13632	2.80167e-07	3.15228e-06	8.62806	1.56027	4.88894	1.01381e-06	1.41592e-05	NLR family pyrin domain containing 12 [Source:HGNC Symbol;Acc:HGNC:22938]
ENSSSCG00000013940	NLRP3	Myeloid	1231.27	4.51022	0.405579	8.65482	4.93698e-18	2.96066e-16	13.6833	1.48734	8.52754	1.49495e-17	6.08119e-16	3.32456	0.403078	5.76702	8.06866e-09	1.10827e-07	5.30421	0.408832	10.5281	6.41381e-26	3.78773e-24	3.21063	0.402929	5.4864	4.10199e-08	5.26159e-07	3.00815	0.40269	4.98683	6.13776e-07	6.63631e-06	5.69163	0.520414	9.01517	1.96564e-19	1.40296e-17	NACHT, LRR and PYD domains-containing protein 3 [Source:RefSeq peptide;Acc:NP_001243699]
ENSSSCG00000016678	NOD1	Myeloid	184.2	2.86725	0.52775	3.53814	0.00040295	0.00349323	3.55349	0.531682	4.80266	1.56574e-06	1.71363e-05	6.11707	0.5803	8.81797	1.16555e-18	4.02376e-17	10.115	1.14509	7.96006	1.71956e-15	4.72939e-14	7.94828	0.709374	9.79494	1.18363e-22	5.78586e-21	12.5592	1.53396	7.53552	4.8638e-14	1.12496e-12	8.10307	0.980046	7.24769	4.23949e-13	1.4012e-11	nucleotide-binding oligomerization domain-containing protein 1 [Source:RefSeq peptide;Acc:NP_001107749]
ENSSSCG00000038073	NOD2	Myeloid	116.867	3.86202	0.650989	4.39643	1.10047e-05	0.000131177	3.38291	0.645273	3.69287	0.000221733	0.00171291	3.228	0.643788	3.46077	0.000538635	0.00362644	4.10972	0.654749	4.74949	2.03932e-06	1.99206e-05	3.45273	0.645996	3.79682	0.000146566	0.00111813	3.57561	0.647353	3.97868	6.92993e-05	0.000555636	5.29471	0.869754	4.93784	7.89924e-07	1.12622e-05	nucleotide-binding oligomerization domain-containing protein 2 [Source:RefSeq peptide;Acc:NP_001098765]
ENSSSCG00000036201	NPR3	Myeloid	791.933	4.88217	0.497872	7.79752	6.31342e-15	2.69943e-13	14.8228	1.52429	9.0683	1.20888e-19	5.99392e-18	10.3808	0.708743	13.2358	5.44889e-40	7.82622e-38	5.90412	0.503803	9.73421	2.15484e-22	1.01447e-20	9.70771	0.636674	13.6769	1.39576e-42	2.22442e-40	3.84477	0.494894	5.74823	9.01801e-09	1.24603e-07	10.3037	0.953672	9.75561	1.74545e-22	1.73254e-20	natriuretic peptide receptor 3 [Source:HGNC Symbol;Acc:HGNC:7945]
ENSSSCG00000013241	NR1H3	Myeloid	449	4.00269	0.526087	5.70759	1.14588e-08	2.32655e-07	4.36667	0.528038	6.3758	1.82008e-10	3.37179e-09	3.99027	0.526029	5.68461	1.31114e-08	1.76753e-07	2.92661	0.522491	3.68735	0.000226601	0.00160358	4.3618	0.528009	6.36693	1.92846e-10	3.26574e-09	3.90775	0.525653	5.53169	3.17161e-08	4.07269e-07	4.59263	0.67012	5.36117	8.26827e-08	1.35674e-06	oxysterols receptor LXR-alpha [Source:RefSeq peptide;Acc:NP_001095284]
ENSSSCG00000005385	NR4A3	NK	155.333	5.63945	0.760782	6.09826	1.07232e-09	1.98021e-07	6.99094	0.794915	7.53658	4.82461e-14	4.31766e-12	4.89465	0.75172	5.18098	2.20718e-07	1.04383e-05	4.35773	0.747528	4.49177	7.06337e-06	0.00058342	6.2569	0.772669	6.80356	1.02066e-11	1.24993e-09	5.6825	0.76146	6.14937	7.77913e-10	5.9541e-08	5.79432	0.763316	6.28092	3.36584e-10	7.99146e-09	nuclear receptor subfamily 4 group A member 3 [Source:RefSeq peptide;Acc:NP_999412]
ENSSSCG00000026383	NRP2	Myeloid	408.867	4.9116	0.823478	4.7501	2.03316e-06	2.79595e-05	8.96319	0.919361	8.66166	4.64946e-18	1.98139e-16	8.71544	0.903986	8.53491	1.40267e-17	4.39857e-16	10.472	1.08295	8.74651	2.20051e-18	7.73436e-17	7.61338	0.858612	7.70241	1.33521e-14	3.59581e-13	13.9563	1.65793	7.81475	5.50722e-15	1.41126e-13	6.92159	1.07346	5.51634	3.46132e-08	6.01928e-07	neuropilin 2 [Source:HGNC Symbol;Acc:HGNC:8005]
ENSSSCG00000029715	OLFM1	Myeloid	960.067	9.32684	0.735713	11.3181	1.06814e-29	1.75025e-27	10.0897	0.781081	11.6374	2.6612e-31	3.44005e-29	6.10194	0.673029	7.58057	3.44049e-14	8.16871e-13	7.03537	0.680147	8.87362	7.08039e-19	2.59852e-17	5.60085	0.670717	6.8596	6.90537e-12	1.38036e-10	7.66275	0.688194	9.6815	3.61369e-22	1.64225e-20	5.60994	0.845268	5.45382	4.9299e-08	8.3607e-07	olfactomedin 1 [Source:HGNC Symbol;Acc:HGNC:17187]
ENSSSCG00000006345	OLFML2B	Myeloid	135.133	5.46968	0.825072	5.41732	6.05001e-08	1.09125e-06	12.3942	1.64787	6.91445	4.69667e-12	1.082e-10	8.63521	1.02569	7.44397	9.77053e-14	2.20719e-12	9.93736	1.29006	6.92786	4.2725e-12	8.48229e-11	7.8099	0.932764	7.30078	2.86112e-13	6.7381e-12	8.13939	0.964648	7.40103	1.35132e-13	3.02332e-12	8.88799	1.44072	5.47503	4.37437e-08	7.44026e-07	olfactomedin like 2B [Source:HGNC Symbol;Acc:HGNC:24558]
ENSSSCG00000035875	OS9	Myeloid	6292.27	1.76997	0.18646	4.12941	3.63693e-05	0.000391054	2.11368	0.186605	5.96812	2.40002e-09	3.8407e-08	1.97541	0.186542	5.22889	1.70531e-07	1.97016e-06	1.99692	0.186552	5.34391	9.09609e-08	1.07654e-06	1.84225	0.186487	4.51641	6.28955e-06	5.93933e-05	1.99618	0.186551	5.33996	9.29648e-08	1.12194e-06	2.23521	0.23416	5.27506	1.3271e-07	2.10922e-06	OS9, endoplasmic reticulum lectin [Source:HGNC Symbol;Acc:HGNC:16994]
ENSSSCG00000026753	OSBPL11	Myeloid	1215.93	2.97557	0.1973	10.013	1.33593e-23	1.31714e-21	2.99613	0.197365	10.1139	4.79267e-24	3.55146e-22	2.55538	0.196146	7.92971	2.19655e-15	5.83439e-14	3.26609	0.198312	11.4269	3.0697e-30	2.38086e-28	2.39112	0.195778	7.10559	1.19811e-12	2.60539e-11	2.39708	0.19579	7.1356	9.63648e-13	2.00198e-11	2.4807	0.24678	6.00009	1.97207e-09	4.13389e-08	oxysterol binding protein like 11 [Source:HGNC Symbol;Acc:HGNC:16397]
ENSSSCG00000016715	OSBPL3	NK	828.067	3.44157	0.564605	4.32439	1.52957e-05	0.00070336	3.29051	0.564425	4.05813	4.94682e-05	0.000964009	3.55113	0.564747	4.51729	6.26366e-06	0.000217527	3.00742	0.564136	3.5584	0.000373116	0.0148151	3.26598	0.564398	4.01486	5.94807e-05	0.00197151	4.05455	0.565559	5.40093	6.62948e-08	3.20031e-06	5.13176	0.568611	7.26641	3.69157e-13	1.22708e-11	oxysterol binding protein like 3 [Source:HGNC Symbol;Acc:HGNC:16370]
ENSSSCG00000003259	OSCAR	Myeloid	105.133	3.90873	0.727247	3.99965	6.34368e-05	0.000646256	4.63105	0.738948	4.91381	8.93243e-07	1.00698e-05	4.49505	0.736305	4.74675	2.06715e-06	2.04327e-05	4.47763	0.735982	4.72515	2.29942e-06	2.22558e-05	4.57121	0.737756	4.84063	1.29427e-06	1.34416e-05	4.09172	0.72971	4.23692	2.2661e-05	0.000197039	4.79355	0.965085	3.93079	8.46677e-05	0.000813398	osteoclast associated, immunoglobulin-like receptor [Source:HGNC Symbol;Acc:HGNC:29960]
ENSSSCG00000017222	OTOP2	NK	60.1333	8.57844	1.5127	5.00986	5.44692e-07	4.03627e-05	10.3331	1.76641	5.28365	1.26632e-07	4.19726e-06	7.59729	1.45061	4.54793	5.41751e-06	0.000192157	7.30279	1.43819	4.38245	1.1735e-05	0.000842746	8.37406	1.49658	4.92728	8.3384e-07	4.43087e-05	8.28941	1.49046	4.89072	1.00467e-06	3.58538e-05	10.3331	1.76641	5.28365	1.26632e-07	2.0209e-06	otopetrin 2 [Source:HGNC Symbol;Acc:HGNC:19657]
ENSSSCG00000017220	OTOP3	NK	84.1333	9.20609	2.02887	4.04466	5.23991e-05	0.00208771	12.5009	2.37781	4.83677	1.31966e-06	3.54571e-05	11.0151	2.33022	4.29791	1.72416e-05	0.000534903	7.53551	1.93406	3.37916	0.000727083	0.0257109	12.5009	2.37781	4.83677	1.31966e-06	6.6823e-05	12.5009	2.37781	4.83677	1.31966e-06	4.52889e-05	11.093	2.34381	4.30623	1.66064e-05	0.000183999	otopetrin 3 [Source:HGNC Symbol;Acc:HGNC:19658]
ENSSSCG00000010292	P4HA1	Myeloid	1229.27	2.42774	0.235459	6.06366	1.33055e-09	3.0116e-08	1.85404	0.234545	3.64124	0.000271326	0.00205374	2.82651	0.236342	7.72826	1.09025e-14	2.70446e-13	2.93464	0.236626	8.17592	2.9362e-16	8.71423e-15	2.59915	0.235809	6.78154	1.189e-11	2.30163e-10	2.65014	0.235922	6.99442	2.6635e-12	5.33342e-11	2.30959	0.2961	4.42279	9.74351e-06	0.00011313	prolyl 4-hydroxylase subunit alpha-1 precursor [Source:RefSeq peptide;Acc:NP_001090904]
ENSSSCG00000026478	PADI2	Myeloid	1046.47	2.73229	0.503354	3.4415	0.000578502	0.00485942	4.37117	0.505725	6.66602	2.62835e-11	5.33651e-10	6.8817	0.521646	11.2753	1.73832e-29	1.27998e-27	8.54898	0.560411	13.4704	2.33501e-41	3.48276e-39	8.28762	0.551398	13.2166	7.03426e-40	1.03591e-37	7.3366	0.528553	11.9886	4.07806e-33	4.02069e-31	3.85762	0.637085	4.48546	7.27565e-06	8.68832e-05	peptidyl arginine deiminase 2 [Source:HGNC Symbol;Acc:HGNC:18341]
ENSSSCG00000014878	PAK1	Myeloid	1144.53	2.93911	0.243608	7.95995	1.72103e-15	7.85194e-14	5.73945	0.260053	18.2249	3.27297e-74	6.3463e-71	3.62633	0.245341	10.7048	9.66359e-27	6.04442e-25	3.19501	0.24416	8.99002	2.47184e-19	9.49089e-18	4.55774	0.24944	14.2629	3.72816e-46	7.74525e-44	3.418	0.244727	9.88038	5.064e-23	2.44459e-21	4.96671	0.319526	12.4144	2.18378e-35	6.68582e-33	p21 (RAC1) activated kinase 1 [Source:HGNC Symbol;Acc:HGNC:8590]
ENSSSCG00000014184	PAM	Myeloid	806.2	4.41804	0.630782	5.41874	6.00189e-08	1.08425e-06	4.98518	0.632559	6.30009	2.97467e-10	5.37381e-09	5.16576	0.633287	6.57799	4.76854e-11	8.48275e-10	5.65257	0.635763	7.31809	2.51524e-13	5.65671e-12	3.72969	0.629377	4.33713	1.44354e-05	0.000127518	4.42793	0.630807	5.43419	5.50457e-08	6.77673e-07	5.25249	0.796301	5.34031	9.2788e-08	1.5119e-06	peptidylglycine alpha-amidating monooxygenase [Source:HGNC Symbol;Acc:HGNC:8596]
ENSSSCG00000034758	PDXK	Myeloid	624.2	2.9987	0.425804	4.69395	2.67986e-06	3.60433e-05	4.20139	0.429942	7.4461	9.61374e-14	2.63788e-12	4.42969	0.431188	7.95404	1.8053e-15	4.85054e-14	4.25288	0.430206	7.56122	3.99316e-14	9.80093e-13	3.48465	0.427081	5.81775	5.96452e-09	8.49342e-08	3.01299	0.425835	4.72716	2.27676e-06	2.26586e-05	3.58458	0.53829	4.80147	1.57508e-06	2.14824e-05	pyridoxal kinase [Source:RefSeq peptide;Acc:NP_999108]
ENSSSCG00000003402	PGD	Myeloid	3664.87	2.38648	0.384623	3.60478	0.000312416	0.00277666	2.81748	0.384792	4.72327	2.32086e-06	2.45909e-05	3.22067	0.385002	5.76795	8.02434e-09	1.10349e-07	2.833	0.384799	4.76353	1.9024e-06	1.86772e-05	3.14432	0.384958	5.57027	2.5435e-08	3.34741e-07	2.97959	0.38487	5.14354	2.6961e-07	3.03938e-06	3.03159	0.482858	4.20743	2.5829e-05	0.000273426	phosphogluconate dehydrogenase [Source:HGNC Symbol;Acc:HGNC:8891]
ENSSSCG00000004236	PKIB	Myeloid	183.267	3.02011	0.746305	2.70682	0.00679312	0.0435674	7.40647	0.835651	7.66644	1.76832e-14	5.22149e-13	7.62987	0.850396	7.79621	6.37924e-15	1.62754e-13	7.51709	0.842699	7.73359	1.04557e-14	2.67404e-13	8.21684	0.900102	8.0178	1.07659e-15	3.2198e-14	6.41175	0.790168	6.84887	7.44382e-12	1.42436e-10	8.63703	1.25352	6.09248	1.11176e-09	2.42214e-08	cAMP-dependent protein kinase inhibitor beta [Source:HGNC Symbol;Acc:HGNC:9018]
ENSSSCG00000001723	PLA2G7	Myeloid	465	3.91934	0.455764	6.40537	1.5001e-10	3.85257e-09	4.02417	0.456203	6.629	3.37961e-11	6.79075e-10	7.24058	0.50404	12.3811	3.30687e-35	3.69924e-33	7.50587	0.513977	12.6579	1.01156e-36	1.21325e-34	7.71604	0.523027	12.8407	9.69659e-38	1.2262e-35	8.30819	0.555253	13.1619	1.45347e-39	2.0373e-37	5.33293	0.601162	7.20759	5.69516e-13	1.84561e-11	platelet-activating factor acetylhydrolase isoform 1 precursor [Source:RefSeq peptide;Acc:NP_001309735]
ENSSSCG00000010332	PLAC9	Myeloid	219.933	10.6619	1.28789	7.50214	6.27821e-14	2.32614e-12	13.1289	1.64863	7.35697	1.88138e-13	4.98587e-12	9.35504	1.02483	8.1526	3.56177e-16	1.01563e-14	11.6799	1.62243	6.58262	4.62224e-11	8.14774e-10	9.73015	1.083	8.06107	7.56298e-16	2.29733e-14	8.55214	0.93484	8.07854	6.55483e-16	1.82002e-14	10.5728	1.77379	5.39683	6.78303e-08	1.13057e-06	placenta-specific protein 9 precursor [Source:RefSeq peptide;Acc:NP_001177138]
ENSSSCG00000010312	PLAU	Myeloid	115.533	4.20041	0.841978	3.80106	0.000144077	0.00136165	10.5169	1.6535	5.75561	8.63292e-09	1.28763e-07	4.90093	0.851641	4.58048	4.63906e-06	4.31077e-05	7.73033	0.992513	6.7811	1.19262e-11	2.23789e-10	3.60479	0.836703	3.11316	0.00185094	0.0115587	6.33231	0.893022	5.97108	2.35682e-09	3.4708e-08	8.55865	1.45937	5.17939	2.22616e-07	3.43947e-06	urokinase-type plasminogen activator precursor [Source:RefSeq peptide;Acc:NP_999110]
ENSSSCG00000032434	PLAUR	Myeloid	181.933	5.99836	0.56506	8.84572	9.09441e-19	6.04596e-17	6.21765	0.572849	9.10824	8.37309e-20	4.25382e-18	6.83978	0.601649	9.70628	2.83486e-22	1.30359e-20	7.32745	0.63303	9.9955	1.59479e-23	7.96302e-22	7.21233	0.6248	9.94292	2.70768e-23	1.38163e-21	5.99558	0.564968	8.84224	9.38203e-19	3.15464e-17	6.25095	0.757772	6.92946	4.22446e-12	1.26669e-10	plasminogen activator, urokinase receptor [Source:HGNC Symbol;Acc:HGNC:9053]
ENSSSCG00000004779	PLCB2	Myeloid	3478.2	2.7862	0.566605	3.15246	0.00161899	0.0120662	2.84201	0.56662	3.25088	0.00115049	0.0078	2.78344	0.566604	3.1476	0.00164619	0.0101332	2.82073	0.566614	3.21336	0.00131193	0.0081971	3.96365	0.567112	5.22587	1.73341e-07	2.04528e-06	6.18426	0.570428	9.08838	1.00529e-19	3.70113e-18	5.64477	0.714338	6.5022	7.91524e-11	2.02832e-09	phospholipase C beta 2 [Source:HGNC Symbol;Acc:HGNC:9055]
ENSSSCG00000007058	PLCB4	Myeloid	61.5333	3.46507	0.797614	3.09055	0.00199784	0.0145723	7.05472	0.976949	6.19758	5.73382e-10	9.91193e-09	7.08563	0.980773	6.20494	5.47191e-10	8.75655e-09	11.0814	1.63966	6.14849	7.82226e-10	1.19428e-08	8.03897	1.13666	6.19265	5.91607e-10	9.54612e-09	6.52989	0.921371	6.00181	1.95133e-09	2.91797e-08	4.5331	1.06192	3.3271	0.000877541	0.00676114	phospholipase C beta 4 [Source:HGNC Symbol;Acc:HGNC:9059]
ENSSSCG00000003433	PLOD1	Myeloid	242.867	3.67133	0.49356	5.41236	6.21996e-08	1.11328e-06	4.34403	0.499432	6.69567	2.14681e-11	4.41271e-10	5.12053	0.510453	8.0723	6.89887e-16	1.90645e-14	4.41194	0.500185	6.82135	9.0186e-12	1.72492e-10	4.89826	0.506702	7.69339	1.43284e-14	3.81456e-13	3.55057	0.492761	5.17609	2.26588e-07	2.59206e-06	5.09791	0.655867	6.24807	4.15551e-10	9.7667e-09	procollagen-lysine,2-oxoglutarate 5-dioxygenase 1 [Source:HGNC Symbol;Acc:HGNC:9081]
ENSSSCG00000032444	PLXDC2	Myeloid	118.2	7.81416	1.22353	5.56928	2.55791e-08	4.8997e-07	12.4105	1.82398	6.25579	3.955e-10	6.98216e-09	10.2954	1.57484	5.90244	3.58168e-09	5.12538e-08	8.6438	1.29574	5.89917	3.65326e-09	5.10228e-08	12.4105	1.82398	6.25579	3.955e-10	6.50812e-09	4.94986	1.13218	3.48872	0.000485331	0.00335692	7.21194	1.59529	3.89393	9.86347e-05	0.000929916	plexin domain containing 2 [Source:HGNC Symbol;Acc:HGNC:21013]
ENSSSCG00000000907	PLXNC1	Myeloid	4466.53	2.4474	0.44467	3.255	0.00113394	0.0088717	2.85461	0.444771	4.16981	3.04851e-05	0.000268278	4.90388	0.446054	8.75205	2.09509e-18	7.08556e-17	5.16316	0.446386	9.32638	1.09549e-20	4.61773e-19	3.13024	0.444857	4.7886	1.67951e-06	1.71549e-05	4.2242	0.445419	7.23859	4.53388e-13	9.71403e-12	5.47399	0.560169	7.98685	1.38425e-15	6.34031e-14	plexin C1 [Source:HGNC Symbol;Acc:HGNC:9106]
ENSSSCG00000036751	PPM1H	Myeloid	314.667	4.72873	0.754565	4.94156	7.75001e-07	1.15005e-05	11.1362	1.26385	8.02008	1.05676e-15	3.61597e-14	8.67792	0.863943	8.88707	6.27423e-19	2.22544e-17	11.1362	1.26385	8.02008	1.05676e-15	2.98405e-14	7.49249	0.800213	8.11345	4.92013e-16	1.53461e-14	9.3297	0.924391	9.01102	2.04149e-19	7.19719e-18	13.5827	2.25033	5.5915	2.25118e-08	4.02308e-07	protein phosphatase, Mg2+/Mn2+ dependent 1H [Source:HGNC Symbol;Acc:HGNC:18583]
ENSSSCG00000036673	PPT1	Myeloid	5326.6	3.11644	0.442771	4.77998	1.75311e-06	2.43968e-05	3.25419	0.442815	5.09059	3.56955e-07	4.28126e-06	3.08338	0.442761	4.70543	2.53337e-06	2.45786e-05	2.5493	0.442629	3.50023	0.00046486	0.00310102	3.7128	0.442995	6.12376	9.13922e-10	1.44073e-08	3.67093	0.442976	6.02952	1.64451e-09	2.48794e-08	3.15315	0.555314	3.87736	0.000105597	0.000989941	palmitoyl-protein thioesterase 1 [Source:HGNC Symbol;Acc:HGNC:9325]
ENSSSCG00000024810	PRAM1	Myeloid	1314	4.64865	0.382624	9.53587	1.4864e-21	1.27153e-19	4.6052	0.382479	9.42586	4.26598e-21	2.44485e-19	3.95047	0.380751	7.74909	9.25558e-15	2.31569e-13	4.23602	0.381411	8.48435	2.1693e-17	7.16979e-16	3.81597	0.380483	7.40105	1.35108e-13	3.25434e-12	3.09265	0.379397	5.51571	3.47372e-08	4.43615e-07	4.70182	0.48188	7.68205	1.56564e-14	6.11229e-13	PML-RARA regulated adaptor molecule 1 [Source:HGNC Symbol;Acc:HGNC:30091]
ENSSSCG00000014899	PRCP	Myeloid	2129.73	4.03509	0.28118	10.7941	3.66893e-27	4.6396e-25	3.79253	0.280802	9.94484	2.65605e-23	1.80705e-21	4.90675	0.283199	13.7951	2.72783e-43	4.73666e-41	4.50684	0.282123	12.4302	1.79195e-35	1.99039e-33	5.18471	0.28414	14.7277	4.28296e-49	9.77018e-47	5.13207	0.283947	14.5522	5.65259e-48	1.31525e-45	4.8362	0.356948	10.7472	6.10761e-27	8.88199e-25	prolylcarboxypeptidase [Source:HGNC Symbol;Acc:HGNC:9344]
ENSSSCG00000023503	PRKCD	Myeloid	3198	2.45459	0.212042	6.85992	6.89005e-12	2.06595e-10	1.9176	0.211756	4.3333	1.46889e-05	0.000136277	5.14635	0.217005	19.1072	2.20061e-81	1.82871e-78	5.25018	0.217438	19.5467	4.4033e-85	5.1228e-82	4.17465	0.214141	14.825	1.00924e-49	2.39623e-47	4.24268	0.214286	15.1325	9.89081e-52	2.73976e-49	4.1231	0.269322	11.5962	4.30993e-31	9.11667e-29	protein kinase C delta [Source:HGNC Symbol;Acc:HGNC:9399]
ENSSSCG00000010281	PSAP	Myeloid	46077.9	3.59017	0.256586	10.0948	5.82722e-24	5.89512e-22	5.16646	0.256763	16.2269	3.25502e-59	2.07757e-56	5.15331	0.25676	16.1758	7.46886e-59	2.80299e-56	4.65716	0.256683	14.2477	4.62961e-46	8.82965e-44	4.98205	0.256731	15.5106	2.94069e-54	9.50333e-52	4.96252	0.256728	15.4347	9.56192e-54	3.00658e-51	4.964	0.321903	12.3143	7.59004e-35	2.10244e-32	saposin-B-Val precursor [Source:RefSeq peptide;Acc:NP_001185848]
ENSSSCG00000015579	PTGS2	Myeloid	152.6	8.65288	1.10552	6.92243	4.43967e-12	1.35567e-10	6.85638	0.962608	6.08387	1.17314e-09	1.95814e-08	7.48166	0.997298	6.49923	8.07343e-11	1.40608e-09	9.72612	1.28326	6.79996	1.04652e-11	1.9894e-10	7.8957	1.02801	6.70783	1.97535e-11	3.70665e-10	3.35045	0.896937	2.62053	0.00877925	0.0472963	11.5561	2.33145	4.52769	5.96321e-06	7.30274e-05	prostaglandin G/H synthase 2 precursor [Source:RefSeq peptide;Acc:NP_999486]
ENSSSCG00000011326	PTH1R	NK	701.133	6.4312	0.503349	10.7901	3.83325e-27	1.48654e-23	7.31289	0.512732	12.3123	7.78177e-35	4.52666e-32	7.32746	0.512939	12.3357	5.81745e-35	7.52002e-32	4.45279	0.494888	6.97691	3.01738e-12	1.59565e-09	4.39601	0.494776	6.86372	6.70885e-12	8.577e-10	5.13477	0.496639	8.3255	8.39726e-17	1.95387e-14	5.73079	0.499007	9.48042	2.53265e-21	2.30195e-19	Parathyroid hormone/parathyroid hormone-related peptide receptor [Source:UniProtKB/Swiss-Prot;Acc:P50133]
ENSSSCG00000007410	PTI	Myeloid	217.133	7.00823	0.944921	6.35845	2.03803e-10	5.15444e-09	11.4037	1.59518	6.52196	6.93936e-11	1.34554e-09	3.88541	0.893007	3.23112	0.00123307	0.00776271	5.2745	0.904323	4.72674	2.28158e-06	2.21199e-05	3.672	0.892034	2.9954	0.00274088	0.016522	9.57937	1.18113	7.26368	3.76687e-13	8.16085e-12	13.3091	2.32698	5.28975	1.22483e-07	1.96006e-06	pancreatic trypsin inhibitor precursor [Source:RefSeq peptide;Acc:NP_001177144]
ENSSSCG00000011485	PTPRG	NK	51.5333	5.12796	1.33903	3.0828	0.00205062	0.0473352	8.46114	1.48351	5.02937	4.92087e-07	1.44205e-05	12.1962	1.95619	5.72346	1.04376e-08	6.59951e-07	7.69407	1.42056	4.71229	2.44951e-06	0.000249979	12.1962	1.95619	5.72346	1.04376e-08	8.09539e-07	9.29964	1.59435	5.20565	1.93319e-07	8.36088e-06	9.21515	1.58061	5.19746	2.02028e-07	3.13386e-06	protein tyrosine phosphatase, receptor type G [Source:HGNC Symbol;Acc:HGNC:9671]
ENSSSCG00000008491	QPCT	Myeloid	297.267	7.88387	0.788209	8.73356	2.46783e-18	1.51909e-16	5.28988	0.725492	5.91306	3.35803e-09	5.27937e-08	11.1007	1.25013	8.07971	6.49219e-16	1.79834e-14	8.75624	0.84597	9.16845	4.79847e-20	1.95879e-18	8.35316	0.815456	9.01724	1.92887e-19	7.79185e-18	9.27819	0.897932	9.21918	2.99393e-20	1.16493e-18	8.39131	1.07937	6.84782	7.49828e-12	2.17002e-10	glutaminyl-peptide cyclotransferase [Source:HGNC Symbol;Acc:HGNC:9753]
ENSSSCG00000022162	RAB11FIP5	Myeloid	423.2	7.18936	0.590041	10.4897	9.63085e-26	1.10936e-23	10.0029	0.808245	11.1388	8.11762e-29	8.8262e-27	5.19184	0.555644	7.54411	4.55375e-14	1.06596e-12	8.50296	0.651558	11.5154	1.10333e-30	8.97634e-29	5.14535	0.555263	7.46556	8.29474e-14	2.04451e-12	6.76441	0.578643	9.96195	2.23629e-23	1.10711e-21	5.61446	0.705277	6.54277	6.03902e-11	1.56477e-09	RAB11 family interacting protein 5 [Source:HGNC Symbol;Acc:HGNC:24845]
ENSSSCG00000022719	RAB20	Myeloid	93.6667	5.06071	0.822669	4.93602	7.9732e-07	1.18166e-05	7.21733	0.925567	6.71732	1.85099e-11	3.82494e-10	6.14629	0.857651	6.00044	1.9678e-09	2.92711e-08	5.97676	0.850461	5.85184	4.86154e-09	6.6384e-08	7.33806	0.936341	6.76897	1.29705e-11	2.49419e-10	5.64391	0.838417	5.5389	3.04372e-08	3.9171e-07	5.25051	1.06916	3.97558	7.0209e-05	0.000686396	RAB20, member RAS oncogene family [Source:HGNC Symbol;Acc:HGNC:18260]
ENSSSCG00000037264	RAB31	Myeloid	5916.8	2.32321	0.224121	5.90399	3.54811e-09	7.64422e-08	2.72839	0.224282	7.70631	1.29508e-14	3.93394e-13	3.87137	0.225075	12.7574	2.83405e-37	3.5453e-35	3.23478	0.224558	9.95189	2.47442e-23	1.23023e-21	3.01829	0.224428	8.99304	2.40475e-19	9.61406e-18	2.12048	0.224056	5.0009	5.70638e-07	6.18715e-06	4.80993	0.284848	13.3753	8.42669e-41	3.38056e-38	RAB31, member RAS oncogene family [Source:HGNC Symbol;Acc:HGNC:9771]
ENSSSCG00000025455	RALB	Myeloid	2385.33	2.3268	0.269226	4.92821	8.29843e-07	1.22053e-05	3.29952	0.270276	8.50804	1.76896e-17	7.11478e-16	2.90784	0.269767	7.07216	1.52536e-12	3.12431e-11	2.6885	0.269537	6.26446	3.74131e-10	5.94623e-09	2.7327	0.269581	6.42738	1.29825e-10	2.25431e-09	2.34502	0.26924	4.99562	5.86482e-07	6.35301e-06	2.63257	0.338439	4.82383	1.40828e-06	1.92526e-05	RAS like proto-oncogene B [Source:HGNC Symbol;Acc:HGNC:9840]
ENSSSCG00000017389	RAMP2	Myeloid	471.8	6.53155	0.862092	6.41643	1.39509e-10	3.6148e-09	10.2786	1.04223	8.90262	5.45429e-19	2.5484e-17	10.1128	1.0229	8.90884	5.15713e-19	1.84609e-17	10.4232	1.06065	8.88433	6.43058e-19	2.36751e-17	11.8527	1.34514	8.06809	7.14051e-16	2.19189e-14	9.93731	1.00434	8.89864	5.65332e-19	1.93443e-17	8.32014	1.17875	6.21006	5.29634e-10	1.21774e-08	receptor activity-modifying protein 2 precursor [Source:RefSeq peptide;Acc:NP_999247]
ENSSSCG00000002960	RASGRP4	Myeloid	922	2.13634	0.382679	2.96942	0.00298359	0.0208601	3.58646	0.38504	6.71738	1.85016e-11	3.82494e-10	3.44119	0.384684	6.34597	2.21027e-10	3.65779e-09	4.47404	0.388183	8.94948	3.57146e-19	1.33602e-17	4.20178	0.387009	8.27312	1.30494e-16	4.33761e-15	4.16064	0.38685	8.17018	3.0792e-16	8.75878e-15	4.28565	0.487738	6.7365	1.62252e-11	4.50511e-10	RAS guanyl releasing protein 4 [Source:HGNC Symbol;Acc:HGNC:18958]
[truncated: 181 more rows]

## Sheet: Pairwise comparisons Myeloid
Supplementary File 2. Myeloid pairwise comparison
[truncated: 11,635 more rows]

## Sheet: Pairwise comparisons CD21nB
Supplementary File 2. CD21nB pairwise comparison
[truncated: 11,635 more rows]

## Sheet: Pairwise comparisons CD21pB
Supplementary File 2. CD21pB pairwise comparison
[truncated: 11,635 more rows]

## Sheet: Pairwise comparisons NK
Supplementary File 2. NK pairwise comparison
[truncated: 11,635 more rows]

[truncated: 4 more sheets: Pairwise comparisons CD8T, Pairwise comparisons CD4T, Pairwise comparisons CD4CD8T, Pairwise comparisons SWC6gdT]
