# Supplementary material for: Reference transcriptomes of porcine peripheral immune cells created through bulk and single-cell RNA sequencing
Source: bioRxiv preprint, doi:10.1101/2021.04.02.438107, version 1 (2021-04-04)
Supplement: SuppFile05 [file 438107_file11.xlsx]

## Sheet: Adjusted TPM
Supplementary File 5. Adjusted TPM values of Nanostring selected genes in porcine sorted immune cells
Cell.Population	ADAM17	ALOX5	ARG2	ARNT	ATM	B2M	BAK1	BCL2A1	BCL2L1	BID	BIRC3	BIRC6	BLNK	BNIP3	C1QA	C2	C3	C3AR1	C4A	C4BPB	C5	C5AR1	CASP1	CASP10	CASP3	CASP8	CASP9	CCL2	CCL4	CCNB1	CD14	CD19	CD3D	CD3E	CD3G	CD4	CD55	CD79A	CD79B	CD83	CD86	CD8A	CD8B	CDC25B	CDH1	CDH5	CDK1	CDKN2A	CFB
B1_Bcells	9.05022	0.980595	8.76473	14.2865	13.6507	16.6763	13.871	8.69109	10.7209	10.1395	14.4431	14.1608	11.3427	7.93654	3.9474	6.90333	6.22597	7.76462	4.52466	12.5392	7.7836	7.71305	13.3498	11.9983	10.6083	12.557	7.631	7.05726	7.58062	5.50302	6.47572	13.8943	10.9723	11.6444	13.0817	7.32613	14.5164	12.996	9.21487	6.94496	13.9352	6.15412	7.6808	12.7326	7.85808	5.8662	10.6523	7.10649	10.9089
B2_Bcells	7.56865	1.86732	7.43701	13.7488	13.19	16.3496	13.5059	8.42778	9.56359	9.98719	14.8922	13.8074	11.7344	8.27181	4.53006	9.75671	7.0316	8.51904	3.01134	11.5586	8.0762	9.25768	13.2909	11.543	10.2693	11.8859	7.83276	7.61819	6.72807	5.82916	10.7462	13.5497	10.4582	9.31324	10.6375	8.6086	14.5308	12.836	9.38394	9.85503	13.8416	9.0871	8.04635	12.862	6.45743	6.13878	8.28518	7.99038	8.54029
B3_Bcells	9.11972	1.56627	8.48233	13.8824	13.5432	16.7526	13.2888	8.70675	9.49781	9.61428	14.9864	14.0267	11.4433	8.27838	1.86432	9.1528	7.02769	8.14031	4.45527	11.0459	8.22748	9.89904	13.4671	11.629	10.5179	8.802	6.84713	8.53589	8.32653	3.82581	12.0508	13.5728	8.39349	7.80349	5.78432	5.2682	14.3892	12.8963	9.12896	9.76643	13.7024	7.07424	5.10007	12.441	8.03151	7.36679	8.1729	7.44315	9.06036
B1_CD8T	9.28484	1.26796	9.51322	13.4289	13.5282	17.0655	13.145	8.43074	9.70046	9.3947	13.4603	14.1391	1.90601	8.55998	4.24483	8.72951	8.16974	7.23176	6.17043	7.79133	7.09049	5.93147	8.58958	11.4733	10.0631	11.3598	6.71572	6.12577	10.3034	3.73567	10.8442	8.1907	13.9665	14.235	15.8033	8.48938	11.941	8.89206	4.07483	8.26796	12.8054	12.8384	12.4835	13.5554	9.89208	5.79967	8.04992	6.56491	10.1692
B2_CD8T	7.15733	1.54943	8.90949	13.1479	13.4046	16.9732	12.8439	8.69355	9.93582	8.89631	13.9005	13.9635	2.6913	8.33624	7.05153	6.31691	7.72416	8.25011	3.7821	6.09322	7.99858	7.9529	8.43301	11.1403	9.48245	11.6605	6.69457	4.91785	11.1016	4.79577	11.5236	6.21572	14.3166	14.1734	15.9197	7.59519	11.1625	7.43672	2.23885	8.35813	13.0933	13.2111	13.1709	13.1146	7.64052	6.04389	8.33021	8.22594	10.8015
B3_CD8T	7.92304	1.04166	6.72297	13.5515	13.6588	17.0458	13.2397	8.44652	9.72421	9.56004	13.4389	14.1337	2.11695	8.55838	4.21476	8.96438	9.68998	6.96289	4.06308	7.54791	7.07414	8.23069	9.74582	11.2327	10.1881	11.9331	7.44525	4.61997	11.9966	3.19698	11.0979	5.77999	13.8504	14.709	15.8335	7.41718	11.5966	8.28568	3.07018	8.27091	12.7416	12.8495	12.105	13.5541	9.75449	5.517	7.01825	6.59416	8.41014
B1_CD4T	8.72256	1.61981	11.2193	13.9604	13.7822	16.9287	12.5307	8.14726	8.76988	9.49923	14.4627	14.3999	2.60826	8.40641	5.61429	5.50543	7.81302	7.53043	3.16464	4.34144	6.92554	6.74102	6.40252	11.5539	9.52486	11.4274	7.7857	3.74562	6.33895	4.31739	10.6283	6.07069	13.8271	14.3713	15.8208	11.3359	11.407	4.5154	3.34958	8.36825	12.8632	8.86555	2.99715	14.5953	6.82271	6.76734	8.10079	7.48465	8.7094
B2_CD4T	8.63242	1.06705	10.6815	13.5614	13.8375	17.0143	12.5048	7.81126	8.58916	9.31503	14.1527	14.0813	2.14828	8.12389	4.4215	7.63204	7.23783	7.29983	2.33096	4.24241	7.78172	8.96535	9.17164	11.5026	10.0377	10.3936	7.10919	4.71925	6.79178	3.3863	10.6039	6.06081	14.1528	14.3071	15.4962	10.5892	10.028	2.71685	2.99058	8.74122	11.751	9.63311	7.8012	13.9344	9.55327	6.10188	8.57066	7.84788	8.85351
B3_CD4T	8.15674	0.998572	9.83632	13.5223	13.5065	16.6466	12.7569	7.96685	8.9331	9.77382	14.2484	14.2275	1.9655	8.06544	4.90613	6.64687	7.17248	8.08603	2.41103	7.20266	7.09385	8.66033	10.5614	11.4678	9.75307	12.483	7.56079	4.59551	6.26011	4.54448	10.4373	6.40545	14.0621	14.8743	16.1963	11.1549	10.7645	2.76992	4.10235	7.59393	12.6014	9.06435	10.0353	14.3114	7.8253	5.92792	8.39545	6.4652	11.5701
B1_CD4CD8T	8.65423	1.29706	8.91014	13.7374	12.8457	17.1376	13.0279	6.71342	9.79039	9.76371	14.1889	13.9032	2.35274	8.44317	4.3871	6.13197	7.69059	6.72061	3.38976	6.94905	6.16551	7.95705	10.8403	11.6659	9.59501	12.3758	7.50308	4.19148	5.89486	1.66283	11.0161	5.91026	14.0597	14.5691	15.839	11.5027	10.8152	2.54786	1.58597	5.55019	13.9302	11.0184	7.05718	14.0759	7.54794	6.28311	7.79742	6.5347	8.77094
B2_CD4CD8T	7.77777	1.1263	9.04648	13.5968	13.4296	17.1204	12.569	7.27511	9.62844	8.62644	14.8704	14.1329	2.04287	8.145	4.67421	4.97055	8.22164	5.29025	4.03342	8.04551	6.25685	8.48405	9.71542	11.2164	9.87902	12.2444	7.63787	5.68961	10.2701	4.70837	10.9685	5.07988	14.1106	14.7954	15.9065	10.8756	10.9421	2.65297	2.58672	7.24166	13.9482	11.1863	8.17024	13.2387	9.55773	5.39486	8.29502	7.27197	7.27108
B3_CD4CD8T	7.27361	0.83204	10.5456	13.9754	13.2421	17.159	12.7325	7.3248	8.75722	9.23919	14.0541	14.132	2.04262	8.20729	5.96322	7.87348	7.60386	6.83741	2.93748	6.07198	8.13607	4.94834	8.79344	11.5944	9.42204	11.5252	7.55185	2.90886	6.42189	3.63845	10.8777	5.3692	13.7331	14.5284	15.4699	12.1015	11.4893	2.64508	0.746323	7.24923	13.8532	11.4149	9.33672	14.3388	6.0431	6.37981	8.32874	7.87144	11.9006
B1_SWC6gdT	7.3134	0.613484	7.66735	14.2494	13.7432	17.0994	13.2145	6.38484	8.31781	10.1193	14.2309	14.1527	2.16609	8.15958	2.90592	5.55877	6.43914	4.06977	3.57116	7.12975	6.90966	6.64695	7.73255	11.2798	9.48077	11.2033	7.39306	6.03848	6.5092	1.7239	7.446	5.84065	14.1967	15.0384	16.0952	5.96869	9.98482	9.06693	3.50204	6.33921	11.3792	11.0784	6.25865	14.1155	6.64282	4.79005	5.13392	5.68914	9.60236
B2_SWC6gdT	8.62475	0.341487	10.1191	14.2602	13.4836	16.8088	12.9521	7.50634	9.23089	10.2234	14.8984	14.1897	4.28451	8.13282	3.75919	4.21321	6.50735	7.56394	5.55851	6.65767	7.1481	7.95985	9.84244	11.5562	8.82142	11.3135	6.7036	5.21643	6.78501	3.87179	9.80754	5.52483	14.1835	14.7037	16.2069	8.7841	10.8534	8.63857	3.80114	7.14346	12.472	10.4006	8.90428	14.1879	5.12543	5.34067	8.02484	5.6887	13.0518
B3_SWC6gdT	7.5367	0.454865	5.84453	14.1305	13.2756	17.3665	12.9226	7.30733	8.35825	10.0768	13.6536	14.1821	1.55039	8.3469	3.49487	7.85455	5.09744	7.207	4.34752	7.9309	7.95089	8.37045	10.035	10.9517	9.64919	7.28233	6.98942	5.73441	6.64723	2.59946	10.2267	5.46827	14.025	14.6726	15.7234	8.5488	10.7445	9.46606	3.50624	7.68599	11.9637	10.2716	9.14836	13.8651	5.07983	5.66043	8.63805	6.13502	12.681
B1_Myeloid	8.23114	2.98753	12.9675	12.7781	12.0041	16.488	11.307	8.26853	8.45675	8.95315	13.6382	13.1081	10.2828	8.47324	2.91335	14.4738	7.9619	9.4702	3.3886	5.31407	6.9151	15.1736	14.9281	9.62016	10.1063	10.6644	7.38119	6.11074	6.23648	1.38231	13.9314	5.62689	7.14743	7.65762	9.60911	5.86633	13.1892	6.19788	4.27594	11.3576	14.091	5.22307	6.11801	11.0337	6.64633	4.84706	4.92527	5.98916	9.59466
B2_Myeloid	8.35453	0.763556	13.624	13.3215	12.3513	16.3807	11.9476	8.07934	7.99051	9.38308	12.8914	12.7309	9.8797	8.29976	0.389234	14.8141	7.17184	9.22763	3.02849	7.99389	7.07036	15.6475	15.3654	10.1285	10.4531	11.6258	6.60747	4.21269	5.4157	2.17905	14.0653	5.40169	7.30912	5.73699	3.74583	5.53609	12.5562	2.06041	3.07528	10.2669	14.0854	6.11621	7.17284	9.79445	6.99686	2.12583	6.92149	7.8228	12.0907
B3_Myeloid	7.03318	2.58706	12.9929	12.9683	12.3652	16.343	12.2103	7.92621	8.72074	9.43159	13.1406	12.8897	9.9518	8.6142	3.22545	14.4417	8.45143	8.27285	2.98922	8.07006	6.36192	14.8552	14.8937	9.65691	9.97604	11.7555	7.44796	5.96172	6.20652	3.26968	13.1541	5.93237	9.98698	10.2327	11.9703	7.12864	12.8663	8.01701	4.59448	10.9088	13.8496	8.06665	6.52256	10.9347	7.36979	4.04114	6.8301	5.42677	8.84313
B1_NK	8.85102	0.903797	7.1312	13.9404	13.3614	17.1268	12.6611	7.33879	9.27193	8.83588	13.5503	14.1154	1.92031	8.55683	3.34555	8.21404	6.02931	6.98182	6.72124	8.54901	6.0921	5.41738	10.9408	11.9452	9.95268	12.2539	7.04236	6.46553	13.6017	2.27566	10.3643	8.75948	13.0138	13.9564	16.2948	7.65131	11.2789	7.39423	3.4289	3.38053	13.1074	11.7808	10.0266	13.6043	10.667	5.25349	7.01283	3.01232	12.6034
B2_NK	7.14655	0.920925	5.43193	13.8619	13.1587	17.2768	12.6824	7.54914	9.87954	9.34011	13.0318	13.6945	4.63021	8.75492	4.21475	6.08561	8.3772	7.21404	4.40396	7.94559	7.12195	6.00108	10.6142	11.8768	9.35848	11.7761	7.08438	1.20931	13.9832	4.01417	10.016	4.87993	13.4676	13.454	15.8042	7.89762	10.2692	8.2448	4.54488	7.48756	12.8625	12.087	9.13039	13.3974	8.47868	5.92393	8.22901	6.7452	11.4263
B3_NK	8.90246	1.91636	8.32274	14.0452	13.1546	17.2629	12.9688	6.80044	9.49166	9.06594	13.3001	13.4947	6.43851	8.7647	3.74826	8.25687	6.69867	6.72245	5.42628	8.72628	6.71024	5.93634	9.95996	12.0571	9.69159	12.9135	6.73659	4.40272	13.1613	2.77333	10.6579	8.36777	13.5844	12.5195	15.85	8.26759	10.5455	6.81291	3.7386	6.21565	13.1059	11.9575	9.59188	13.6021	8.73559	5.67579	7.56917	7.10911	7.01853
B1_PBMC	7.90848	0.842822	9.84416	14.2397	13.6027	16.7613	13.374	7.60761	9.26423	9.25941	14.2927	14.5888	10.2545	7.81538	4.63431	11.4399	7.61249	7.3138	2.64236	10.1439	6.51578	10.423	13.1272	11.5746	9.93822	13.5638	7.51804	4.99887	6.36652	3.72729	11.6536	12.2861	12.8011	13.8969	15.1735	9.39272	13.4672	11.5177	7.31097	7.65736	13.7825	10.144	11.3975	13.477	7.59916	5.45357	8.00549	7.16648	10.1962
B2_PBMC	7.49009	0.432423	8.19474	13.9325	12.9893	16.2815	13.2566	7.2665	8.91445	9.78769	14.3706	14.1259	10.4373	8.52455	2.88941	13.9097	8.52286	8.78035	3.94636	11.2987	5.57882	13.5968	13.8254	11.0921	9.84614	12.5616	6.99656	5.83716	6.64501	5.76592	13.609	11.6355	12.736	13.1293	14.4809	11.3896	13.3905	11.38	7.81295	10.1042	13.8209	11.0414	12.3291	12.9576	7.42863	4.58317	9.51213	6.97157	9.77286
B3_PBMC	8.03196	1.18462	8.89868	13.8995	13.4373	16.6356	13.4071	7.53508	9.04573	9.05489	14.175	14.775	11.046	7.96361	5.37908	11.9348	8.36543	7.94949	4.14746	11.3282	7.33833	7.93151	12.5205	11.2924	10.1711	12.8515	7.69608	4.79592	6.67946	5.98395	11.3186	12.5851	12.8811	13.4658	14.785	10.0776	14.5373	11.7302	8.09907	9.70935	13.6642	9.88418	11.6336	13.4671	8.10806	4.59662	9.2721	7.42461	9.44615
[truncated: 185 more columns]
