# Supplementary material for: Reference transcriptomes of porcine peripheral immune cells created through bulk and single-cell RNA sequencing
Source: bioRxiv preprint, doi:10.1101/2021.04.02.438107, version 1 (2021-04-04)
Supplement: SuppFile06 [file 438107_file12.xlsx]

## Sheet: QC
Supplementary File 6. Quality control and mapping statistics of scRNA-seq data
scRNA-seq sample description and mapping statistics.
Samples	No. of Reads sequenced	# genome (%)	# uniquely (%)	# Intergenic region (%)	# Intronic region (%)	# Exonic region (%)	# Transcriptome (%)	# Antisense to Gene (%)	Estimated no. of Cells	Mean reads per Cell	Median Genes per Cell	No. of genes detected	Median UMI Counts per Cell
A	119590111	94	90.5	8.3	28.7	53.4	49.9	1.2	4581	26105	618	13478	1555
B	119453412	93.4	90.3	8.8	30	51.6	47.8	1.3	4204	28414	615	13424	1374
C	84500871	93.5	90.2	9	33.1	48.1	44.3	1.4	5064	16686	595	13468	1263
CT2-01NOV	161757334	91	87.8	8.5	27.5	51.9	48	1.2	4040	40038	765	13607	1953
CT2-30OCT	148532329	93.3	90	8.3	26.9	54.8	50.2	1.3	4638	32025	841	13707	2098
PBMC1	163426564	95.4	92.6	7.1	22	63.5	59.9	1	8283	19730	957	14217	3172
PBMC2	201789412	95.2	92.6	7.6	24.1	60.9	57	1.2	7544	26748	1138	14425	3418
Legend
# - Reads mapped to
No of cells from individual samples filtered and progressed in the quality control steps.
Samples	Total no. of cells entimated	UMIs	Genes detected	Mitochondrial %	Doublet	No. of cell filtered	No. of cells progressed for clustering
A	4581	960	1262	36	93	1533	3048
B	4204	1094	1041	49	83	1400	2804
C	5064	1646	1396	31	96	1968	3096
CT2-01NOV	4040	647	528	441	98	998	3042
CT2-30OCT	4628	568	449	204	91	807	3821
PBMC1	8283	474	1467	249	198	1802	6481
PBMC2	7544	416	633	442	193	1026	6518
Legend
UMIs - number of cells with less than 1000 UMIs.
Genes detected - number os cells with less than 500 genes detected in each sample.
Mitochondrial % - numbero of cells with grater than 10% of mitochondrial reads detected.
Doublet - number of cells with more than 0.25 cell doublet score.
The number of cells included in column 3 - 4 were filtered from the dataset before Seurat based integration and clustering.

## Sheet: Genes detected
Supplementary File 6. Number of total genes detected in porcine PBMC using scRNA-seq
clusters	cellCount	GeneDetected
0	1953	11795
1	1733	11349
2	1407	11722
3	1392	11479
4	1377	11786
5	1337	11417
6	1204	11342
7	1153	11275
8	1115	11758
9	1039	11226
10	990	11580
11	965	11327
12	936	11031
13	930	11947
14	882	12683
15	874	11050
16	843	11664
17	778	11052
18	740	11523
19	700	10941
20	637	11530
21	627	10585
22	618	10908
23	604	10580
24	550	10996
25	531	11486
26	526	10643
27	411	11051
28	360	11066
29	350	11214
30	329	11194
31	271	9854
32	204	10484
33	204	10581
34	126	9290
35	114	9176

## Sheet: DEG scRNA-seq
Supplementary File 6. Cluster-specific differentially expressed genes. Specified genes (gene column) were differentially expressed in cells of a specified cluster (cluster column) compared to the average gene expression for the entire dataset of porcine PBMCs (28, 810 cells). pct.1 column corresponds to the percentage of cells expressing a gene in the specified cluster, while pct.2 corresponds to…
p_val	avg_logFC	pct.1	pct.2	p_val_adj	cluster	gene
0	2.47166	1	0.2	0	30	CST3
0	2.08989	0.918	0.06	0	30	MS4A2		p_val	P value
0	1.81303	0.973	0.217	0	30	C15orf48		avg_logFC	Average Log Fold Change (natural log)
0	1.60969	0.957	0.132	0	30	AIF1		pct.1	% of cells expressed in cluster
0	1.41113	0.833	0.094	0	30	ECM1		pct.2	% of cells expressed in entire dataset
0	1.0594	0.505	0.01	0	30	ENSSSCG00000013100		p_val_adj	Adjusted P value
0	1.04042	0.556	0.044	0	30	PAK1		gene	Gene name
0	0.94507	0.392	0.022	0	30	FCER1A		cluster	Cluster number
0	0.906499	0.447	0.028	0	30	ENSSSCG00000005437
0	0.879825	0.416	0.012	0	30	IL18
0	0.83358	0.398	0.008	0	30	PKIB
0	0.590204	0.237	0.006	0	30	SLAMF9
0	0.535411	0.286	0.005	0	30	FLT3
0	0.459913	0.249	0.01	0	30	EPS8
0	0.422102	0.234	0.009	0	30	TSPAN33
0	0.406123	0.201	0.004	0	30	VLDLR
5.52917e-266	1.23819	0.726	0.109	8.92408e-262	30	TSPAN13
4.54049e-259	2.0164	0.413	0.038	7.32835e-255	30	ENSSSCG00000009239
2.15299e-258	1.00504	0.663	0.094	3.47492e-254	30	CFP
3.93017e-254	1.19033	0.681	0.103	6.3433e-250	30	GRN
1.36385e-250	1.41376	0.954	0.213	2.20125e-246	30	CFD
1.56664e-235	1.18194	0.854	0.174	2.52856e-231	30	SERPINB1
1.91485e-233	0.518133	0.267	0.017	3.09056e-229	30	FXYD6
4.33543e-231	0.624947	0.368	0.033	6.99738e-227	30	CLIC2
5.55126e-231	1.51208	0.997	0.275	8.95973e-227	30	TYROBP
5.73456e-229	1.21418	0.717	0.125	9.25558e-225	30	CD300C
1.50384e-222	1.68894	0.96	0.27	2.42719e-218	30	LGALS1
5.63274e-220	1.17066	0.912	0.212	9.09124e-216	30	PLD4
5.75702e-213	0.733215	0.465	0.056	9.29183e-209	30	CCDC88A
6.19736e-198	1.35183	0.991	0.304	1.00025e-193	30	FCER1G
4.72196e-196	0.541121	0.374	0.039	7.62124e-192	30	ZNF385A
8.36689e-196	1.15682	0.647	0.12	1.35042e-191	30	ENSSSCG00000006350
9.41902e-193	0.41918	0.249	0.017	1.52023e-188	30	ADAM8
5.27305e-191	0.994857	0.468	0.062	8.5107e-187	30	FCRLA
1.54504e-189	0.517166	0.301	0.026	2.49369e-185	30	EBI3
3.54255e-187	0.543591	0.286	0.023	5.71767e-183	30	CLEC12A
5.93978e-166	1.4182	1	0.563	9.58681e-162	30	VIM
3.28771e-163	0.495759	0.304	0.031	5.30636e-159	30	ENSSSCG00000003272
1.6912e-162	0.780457	0.502	0.079	2.7296e-158	30	SERPINB10
2.64893e-158	1.08048	0.833	0.235	4.27538e-154	30	PYCARD
4.22486e-157	0.667282	0.584	0.103	6.81893e-153	30	ENSSSCG00000026653
1.48525e-156	0.979522	0.729	0.166	2.3972e-152	30	FOS
3.60051e-153	1.25001	0.936	0.375	5.81123e-149	30	IFI30
4.01149e-151	1.10987	0.957	0.375	6.47454e-147	30	SLA-DMB
4.0119e-149	1.01681	0.964	0.362	6.4752e-145	30	CTSS
1.54554e-148	0.888755	0.65	0.137	2.49451e-144	30	CD9
7.53748e-147	1.64489	0.997	0.576	1.21655e-142	30	SLA-DQB1
2.05226e-145	1.1806	0.933	0.372	3.31235e-141	30	CAPG
2.37847e-145	0.768409	0.422	0.065	3.83886e-141	30	APLF
6.36436e-141	1.111	0.939	0.352	1.02721e-136	30	PSAP
2.81445e-140	1.66446	0.994	0.644	4.54252e-136	30	HLA-DRA
3.55726e-140	0.450825	0.274	0.029	5.74142e-136	30	IL13RA1
5.40458e-140	0.646781	0.492	0.087	8.72299e-136	30	TIMP2
2.59971e-137	0.956052	1	0.901	4.19594e-133	30	ENSSSCG00000014540
7.97822e-137	0.714092	0.337	0.045	1.28768e-132	30	STOM
1.45451e-136	1.07568	0.921	0.355	2.34758e-132	30	PLP2
1.42754e-134	1.59691	0.988	0.572	2.30404e-130	30	ENSSSCG00000001456
1.26691e-133	0.84501	0.347	0.047	2.04479e-129	30	AQP3
1.58732e-132	0.36189	0.66	0.137	2.56193e-128	30	PLBD1
4.48665e-132	0.756222	0.571	0.123	7.24146e-128	30	GUSB
4.49023e-129	1.73107	0.985	0.613	7.24722e-125	30	ENSSSCG00000001455
4.90601e-127	0.841213	0.906	0.283	7.91831e-123	30	SPI1
1.8884e-125	0.848608	0.729	0.197	3.04787e-121	30	CTSB
2.75529e-124	0.619957	0.371	0.056	4.44703e-120	30	ENSSSCG00000002953
2.16688e-121	0.460858	0.271	0.032	3.49734e-117	30	ENSSSCG00000013101
2.32096e-121	0.985067	0.553	0.124	3.74603e-117	30	TIMP1
1.66967e-119	0.692197	0.544	0.117	2.69485e-115	30	SPINT2
1.94891e-119	0.539902	0.395	0.065	3.14554e-115	30	IFRD1
8.59226e-119	0.970438	0.979	0.461	1.38679e-114	30	SLA-DMA
1.20547e-117	0.605858	0.416	0.072	1.94563e-113	30	RAMP2
3.57607e-116	0.738821	0.705	0.183	5.77178e-112	30	ANXA5
7.96812e-115	0.572184	0.438	0.079	1.28605e-110	30	SLA-DOA
2.56138e-113	1.28589	1	0.795	4.13407e-109	30	CD74
4.86393e-112	0.559814	0.672	0.164	7.85038e-108	30	CASP1
2.68205e-111	0.588253	0.21	0.022	4.32883e-107	30	BATF3
2.73675e-110	0.497011	0.374	0.064	4.41711e-106	30	GNG11
7.88762e-109	0.632993	0.447	0.087	1.27306e-104	30	ENSSSCG00000030088
6.24145e-108	0.795326	0.739	0.221	1.00737e-103	30	CSRP1
8.24716e-108	0.585862	0.368	0.062	1.33109e-103	30	ENSSSCG00000038406
8.42474e-107	1.28363	0.511	0.124	1.35975e-102	30	IRF8
7.92103e-103	0.391879	0.267	0.036	1.27845e-98	30	ENSSSCG00000001850
9.91238e-103	0.527356	0.365	0.066	1.59986e-98	30	ACER3
2.02474e-102	0.481791	0.818	0.238	3.26793e-98	30	ANXA1
1.15683e-100	0.543315	0.38	0.071	1.86712e-96	30	ENSSSCG00000023264
1.37137e-99	0.552973	0.681	0.183	2.21339e-95	30	FGL2
1.66962e-99	0.652385	0.571	0.142	2.69477e-95	30	ALOX5AP
4.18493e-98	-1.18098	0.848	0.93	6.75447e-94	30	RAC2
1.12841e-96	0.540098	0.368	0.069	1.82125e-92	30	OXCT1
2.68632e-95	0.802653	0.97	0.482	4.33571e-91	30	CD63
1.01891e-93	0.345422	0.231	0.03	1.64453e-89	30	C9orf72
2.01901e-93	0.519664	0.319	0.055	3.25868e-89	30	ARL8A
1.18219e-92	0.369011	0.213	0.026	1.90806e-88	30	NR4A2
6.19956e-92	0.593062	0.574	0.155	1.00061e-87	30	DCXR
2.20885e-91	0.938083	0.982	0.689	3.56509e-87	30	CD52
2.48319e-90	0.71925	0.812	0.315	4.00787e-86	30	TPM4
7.03652e-88	0.857052	0.954	0.487	1.13569e-83	30	S100A6
1.76963e-87	0.783781	0.888	0.357	2.85618e-83	30	CTSZ
2.68766e-85	0.759346	0.851	0.341	4.33788e-81	30	SYNGR2
9.44692e-85	0.365983	0.216	0.028	1.52473e-80	30	CD83
1.20093e-84	0.429271	0.322	0.059	1.93829e-80	30	NAAA
3.52941e-84	0.355	0.258	0.039	5.69646e-80	30	PPM1J
6.95494e-84	0.466056	0.599	0.166	1.12253e-79	30	MEF2C
1.51407e-83	0.766733	0.805	0.313	2.44371e-79	30	CTSH
1.61188e-83	0.428096	1	0.999	2.60158e-79	30	TMSB10
1.87798e-83	0.358937	0.292	0.049	3.03106e-79	30	AHR
4.25802e-83	0.487477	0.45	0.106	6.87244e-79	30	UNC93B1
4.35384e-83	0.432874	0.413	0.091	7.0271e-79	30	CORO1B
1.12195e-81	0.801092	0.848	0.371	1.81083e-77	30	PRDX2
1.89256e-81	0.416922	0.231	0.034	3.05459e-77	30	SPATS2L
2.27834e-80	0.66474	0.723	0.261	3.67724e-76	30	LAMTOR1
2.40189e-80	0.359193	0.204	0.027	3.87665e-76	30	PARM1
2.47525e-80	0.915613	0.945	0.525	3.99505e-76	30	S100A4
2.09483e-79	0.56012	0.55	0.15	3.38105e-75	30	GLUL
1.24377e-77	0.704012	0.83	0.343	2.00745e-73	30	FCGRT
4.44872e-76	0.426647	0.304	0.058	7.18024e-72	30	FBP1
1.30869e-75	0.692188	0.757	0.29	2.11222e-71	30	SSR1
3.05907e-75	0.40391	0.271	0.048	4.93734e-71	30	SLC44A1
1.38289e-74	0.759784	0.833	0.359	2.23198e-70	30	ZFP36
4.13042e-72	0.568152	0.444	0.116	6.6665e-68	30	NOTCH2
7.1501e-72	0.412195	0.319	0.066	1.15403e-67	30	SLC49A3
2.04501e-71	0.713776	0.754	0.302	3.30064e-67	30	RAC1
3.03388e-71	0.342058	0.301	0.059	4.89668e-67	30	KMO
3.95369e-71	0.715624	0.684	0.255	6.38126e-67	30	ENSSSCG00000039731
7.48026e-71	0.331248	0.231	0.038	1.20731e-66	30	GNB4
1.41325e-70	0.453123	0.371	0.086	2.28098e-66	30	FGD2
3.12336e-70	0.347406	0.24	0.041	5.0411e-66	30	ENSSSCG00000013260
7.14112e-70	0.393391	0.295	0.058	1.15258e-65	30	ENSSSCG00000002729
8.32737e-69	0.600427	0.547	0.17	1.34404e-64	30	RBPJ
1.69986e-68	0.717476	0.556	0.176	2.74357e-64	30	RGCC
7.3341e-68	0.47524	0.559	0.172	1.18372e-63	30	STX7
7.6143e-68	-0.432393	1	1	1.22895e-63	30	ENSSSCG00000035080
6.82983e-67	0.416665	0.505	0.145	1.10233e-62	30	SNAP23
1.0233e-66	0.513052	0.556	0.172	1.65161e-62	30	ENSSSCG00000013720
4.39921e-66	0.320807	0.231	0.04	7.10033e-62	30	ECI2
5.27612e-66	0.456051	0.368	0.091	8.51566e-62	30	GALK1
2.06837e-65	0.392272	0.353	0.084	3.33834e-61	30	GSTO1
1.23121e-64	0.410023	0.298	0.063	1.98717e-60	30	CSF2RB
2.78034e-64	0.475757	0.45	0.118	4.48746e-60	30	ENSSSCG00000034555
4.85957e-64	0.611324	0.316	0.072	7.84334e-60	30	ENSSSCG00000030300
2.26237e-63	0.573434	0.742	0.296	3.65147e-59	30	BLOC1S1
2.99993e-63	0.541777	0.623	0.222	4.84189e-59	30	H2AFY
3.98331e-63	0.61679	0.921	0.495	6.42906e-59	30	CSTB
4.31089e-62	0.520171	0.559	0.186	6.95777e-58	30	LITAF
2.12434e-60	-0.941668	0.79	0.864	3.42869e-56	30	PTPRC
3.13549e-60	0.463257	0.435	0.123	5.06069e-56	30	PECAM1
4.06351e-60	0.579832	0.793	0.333	6.55851e-56	30	CYBA
5.51409e-60	-1.33265	0.261	0.645	8.89974e-56	30	KLF2
8.62282e-59	0.520857	0.781	0.323	1.39172e-54	30	ENSSSCG00000035224
8.62668e-59	0.560882	0.76	0.321	1.39235e-54	30	RNH1
8.89621e-59	0.425595	0.395	0.108	1.43585e-54	30	ELOVL5
1.23482e-58	0.59094	0.97	0.656	1.993e-54	30	ENSSSCG00000032003
2.27776e-58	0.353529	0.255	0.052	3.6763e-54	30	ENSSSCG00000027665
3.26515e-58	0.258362	0.213	0.038	5.26996e-54	30	ACSS2
6.80904e-58	0.451773	0.389	0.108	1.09898e-53	30	WARS
2.93823e-57	0.422568	0.325	0.079	4.7423e-53	30	GMPR
5.32757e-57	0.314025	0.283	0.062	8.5987e-53	30	C19orf38
8.99567e-57	0.443456	0.511	0.163	1.4519e-52	30	RNF13
1.09213e-56	0.407826	0.426	0.123	1.76269e-52	30	FAM129A
4.26017e-56	0.49073	0.693	0.273	6.87592e-52	30	PPP1CB
1.30555e-55	0.510713	0.681	0.276	2.10716e-51	30	MPC2
2.64362e-54	0.331472	0.277	0.063	4.26681e-50	30	CACUL1
3.09773e-54	0.301667	0.286	0.065	4.99973e-50	30	FHL3
3.73444e-54	-1.11293	0.529	0.731	6.02738e-50	30	PTPRCAP
4.1749e-54	0.267838	0.21	0.039	6.7383e-50	30	ENSSSCG00000012523
1.17097e-53	0.273115	0.207	0.038	1.88994e-49	30	C1orf21
6.81651e-53	0.414067	0.319	0.082	1.10019e-48	30	GALNT1
2.32032e-52	0.353923	0.444	0.134	3.745e-48	30	HHEX
2.72909e-52	0.386206	0.447	0.14	4.40476e-48	30	OSBPL9
4.44804e-52	0.286271	0.225	0.045	7.17914e-48	30	LTBR
9.06433e-52	0.281834	0.228	0.046	1.46298e-47	30	ZDHHC9
1.06038e-51	0.311069	0.35	0.094	1.71145e-47	30	STARD3
1.55265e-51	0.406559	0.799	0.358	2.50598e-47	30	TXNIP
2.04169e-51	0.308076	0.325	0.083	3.29529e-47	30	FES
2.05145e-51	0.307134	0.228	0.047	3.31103e-47	30	RPS6KA4
2.08791e-51	0.322213	0.289	0.069	3.36988e-47	30	CARD9
7.12359e-51	0.356264	0.362	0.101	1.14975e-46	30	ASRGL1
7.75264e-51	0.511751	0.9	0.465	1.25128e-46	30	TSPO
1.12742e-50	0.281803	0.216	0.043	1.81966e-46	30	ENSSSCG00000039956
1.41697e-50	0.389878	0.453	0.145	2.28698e-46	30	ENSSSCG00000001927
1.99565e-50	0.334656	0.343	0.092	3.22098e-46	30	ENSSSCG00000039175
5.57509e-50	0.526182	0.903	0.455	8.9982e-46	30	GNAI2
5.67293e-50	0.352877	0.307	0.077	9.15612e-46	30	CIITA
7.11947e-50	0.353387	0.207	0.041	1.14908e-45	30	KLF10
1.06006e-49	0.399945	0.581	0.209	1.71094e-45	30	LYN
1.98774e-49	-0.934362	0.772	0.858	3.20821e-45	30	BTG1
5.05909e-49	0.345316	0.419	0.129	8.16536e-45	30	COPG2
6.13127e-49	-1.34158	0.091	0.496	9.89587e-45	30	ETS1
7.43266e-49	0.419174	0.571	0.213	1.19963e-44	30	RTN4
1.57063e-48	0.484525	0.751	0.329	2.535e-44	30	ANXA2
2.43528e-48	0.409205	0.523	0.184	3.93054e-44	30	ATP6AP1
3.57424e-48	-1.74273	0.119	0.509	5.76882e-44	30	LTB
3.68516e-48	0.327407	0.237	0.053	5.94785e-44	30	GCA
7.57115e-48	0.46241	0.644	0.266	1.22198e-43	30	AKR1A1
9.72288e-48	0.382618	0.35	0.097	1.56927e-43	30	CSF1R
1.40198e-47	0.363584	0.298	0.078	2.26279e-43	30	CCR2
3.80634e-47	0.348836	0.453	0.149	6.14343e-43	30	TNFAIP8L2
4.20513e-47	0.398819	0.422	0.133	6.78708e-43	30	VCL
5.09098e-47	0.448458	0.997	0.887	8.21684e-43	30	MYL6
6.20773e-47	0.322785	0.307	0.082	1.00193e-42	30	VRK2
9.22756e-47	0.28868	0.392	0.117	1.48933e-42	30	SH3BP5
1.28146e-46	0.293314	0.313	0.084	2.06827e-42	30	PLXNC1
2.15238e-46	0.400014	0.681	0.284	3.47394e-42	30	ENSSSCG00000009145
4.54365e-46	0.403545	0.556	0.208	7.33344e-42	30	DUSP1
7.33842e-46	0.279307	0.277	0.068	1.18442e-41	30	ATG16L2
1.34137e-45	-1.9386	0.131	0.5	2.16498e-41	30	ENSSSCG00000033721
1.41677e-45	0.39823	0.626	0.247	2.28666e-41	30	IRF5
2.23336e-45	0.305149	0.289	0.074	3.60465e-41	30	IGSF6
3.14811e-45	0.367806	0.574	0.22	5.08104e-41	30	RASSF4
3.30304e-45	0.336222	0.459	0.154	5.33111e-41	30	MPP1
8.28599e-45	0.369515	0.404	0.132	1.33736e-40	30	ENSSSCG00000008137
1.72254e-44	0.44758	0.261	0.065	2.78018e-40	30	MARCKS
2.03164e-44	0.325016	0.307	0.083	3.27907e-40	30	RUNX1
2.70214e-44	0.301164	0.243	0.058	4.36126e-40	30	PRCP
3.32591e-44	0.2833	0.231	0.053	5.36802e-40	30	SERPING1
3.70958e-44	-1.92658	0.094	0.469	5.98726e-40	30	ENSSSCG00000037885
1.21888e-43	0.28664	0.255	0.063	1.96728e-39	30	ITPK1
1.27178e-43	0.304245	0.249	0.061	2.05266e-39	30	TAX1BP3
1.53793e-43	0.30725	0.325	0.093	2.48223e-39	30	PLEKHO1
1.70898e-43	0.277544	0.243	0.058	2.7583e-39	30	SNX8
1.25827e-42	0.421693	0.441	0.151	2.03085e-38	30	MTSS1
1.31525e-42	0.471294	0.736	0.353	2.12282e-38	30	GDI2
3.02944e-42	0.27771	0.237	0.057	4.88951e-38	30	ARRB1
4.326e-42	0.509459	0.878	0.529	6.98216e-38	30	ENSSSCG00000000273
5.51387e-42	-1.50523	0.103	0.468	8.89938e-38	30	CD3G
1.03319e-41	-0.374093	1	0.997	1.66757e-37	30	HSD11B1L
1.23805e-41	0.413448	0.647	0.28	1.99822e-37	30	BAZ1A
2.42083e-41	0.323587	0.362	0.114	3.90722e-37	30	DEGS1
3.45898e-41	0.697786	0.422	0.153	5.5828e-37	30	TCF4
3.76079e-41	0.288222	0.319	0.092	6.06992e-37	30	TMX4
1.18985e-40	0.347221	0.462	0.169	1.92041e-36	30	ATP1A1
1.68255e-40	0.315996	0.274	0.075	2.71564e-36	30	ENSSSCG00000022773
3.21734e-40	0.422228	0.502	0.198	5.19278e-36	30	ATG3
3.62606e-40	0.395436	0.763	0.352	5.85247e-36	30	ATP6V0B
4.11832e-40	0.302369	0.416	0.137	6.64697e-36	30	BCL11A
8.93634e-40	0.279929	0.255	0.067	1.44233e-35	30	FAM118B
1.59497e-39	0.321555	0.277	0.078	2.57428e-35	30	RAB31
3.58855e-39	0.279781	0.301	0.086	5.79192e-35	30	ENSSSCG00000024518
4.22243e-39	0.337574	0.374	0.123	6.815e-35	30	HEXB
4.30656e-39	0.399402	0.76	0.371	6.95078e-35	30	ENSSSCG00000031912
5.17374e-39	0.261883	0.219	0.052	8.35042e-35	30	TBC1D9
8.36891e-39	0.290521	0.204	0.047	1.35074e-34	30	ENSSSCG00000032984
1.29286e-38	0.296537	0.383	0.126	2.08668e-34	30	PTPRE
1.67115e-38	-1.92346	0.122	0.456	2.69724e-34	30	CTSW
4.29077e-38	0.321752	0.246	0.065	6.92531e-34	30	SERPINB6
4.38852e-38	0.286487	0.371	0.123	7.08307e-34	30	ARMC10
5.73553e-38	0.270839	0.31	0.092	9.25715e-34	30	EMILIN2
7.82346e-38	0.334576	0.438	0.16	1.26271e-33	30	CHID1
1.27423e-37	0.351324	0.283	0.081	2.05661e-33	30	RGS1
2.1716e-37	0.257448	0.267	0.074	3.50496e-33	30	MSMB
2.19966e-37	0.358586	0.343	0.113	3.55025e-33	30	EFHD2
2.36817e-37	0.320229	0.413	0.147	3.82223e-33	30	ICAM2
3.01478e-37	0.310749	0.289	0.086	4.86585e-33	30	PDXK
3.4819e-37	0.284419	0.322	0.101	5.61979e-33	30	MFSD14B
3.62318e-37	0.360393	1	0.941	5.84782e-33	30	H3F3B
4.0347e-37	-0.318045	0.401	0.125	6.512e-33	30	FCN1
7.38894e-37	0.256586	0.304	0.092	1.19257e-32	30	PICALM
1.35676e-36	0.284652	0.435	0.159	2.18981e-32	30	NSMCE1
3.46536e-36	0.275396	0.416	0.149	5.5931e-32	30	LMO4
6.49085e-36	0.551863	0.538	0.24	1.04762e-31	30	LAP3
1.223e-35	0.309383	0.359	0.121	1.97392e-31	30	RARA
1.94361e-35	0.311872	0.486	0.194	3.13699e-31	30	ARL2
5.48352e-35	0.351256	0.623	0.281	8.85041e-31	30	PGK1
6.91972e-35	0.319673	0.407	0.147	1.11684e-30	30	RHOC
7.22143e-35	0.274099	0.243	0.068	1.16554e-30	30	ATP2B4
7.64699e-35	0.299623	0.729	0.327	1.23422e-30	30	ENSSSCG00000014361
1.04781e-34	0.358371	0.38	0.136	1.69117e-30	30	PEA15
1.40193e-34	0.258481	0.243	0.067	2.26271e-30	30	ARHGAP1
1.42354e-34	0.266268	0.422	0.154	2.29759e-30	30	TMEM173
2.01047e-34	0.313024	0.216	0.055	3.2449e-30	30	GADD45A
3.50254e-34	0.283718	0.374	0.131	5.6531e-30	30	OTULINL
4.80611e-34	0.313852	0.489	0.196	7.75705e-30	30	DNASE1L1
6.71791e-34	0.388709	0.38	0.138	1.08427e-29	30	BCL2A1
6.87483e-34	0.359441	0.684	0.325	1.1096e-29	30	RRAGC
7.94416e-34	-1.37082	0.088	0.402	1.28219e-29	30	CD3E
1.03166e-33	0.336045	0.395	0.147	1.66511e-29	30	NFKB1
1.0871e-33	-0.851114	0.635	0.723	1.75458e-29	30	LIMD2
1.18559e-33	-0.445074	1	0.998	1.91355e-29	30	ENSSSCG00000001229
2.40549e-33	0.28851	0.35	0.122	3.88247e-29	30	CAT
6.10252e-33	-0.285771	1	0.999	9.84947e-29	30	ENSSSCG00000035768
1.12954e-32	0.404365	0.957	0.656	1.82308e-28	30	ENSSSCG00000015710
1.45848e-32	0.272342	0.401	0.15	2.35398e-28	30	CORO1C
5.47319e-32	0.297093	0.319	0.11	8.83373e-28	30	RNASEH2A
8.70195e-32	0.330674	0.666	0.315	1.40449e-27	30	TWF2
1.71568e-31	0.256855	0.328	0.113	2.76911e-27	30	TMEM109
1.74129e-31	0.527534	0.863	0.624	2.81045e-27	30	IFITM3
1.97571e-31	0.305956	0.62	0.285	3.18879e-27	30	ENSSSCG00000012811
5.28438e-31	0.346656	0.672	0.329	8.52898e-27	30	IDH2
8.22098e-31	-1.1956	0.064	0.36	1.32687e-26	30	LCK
8.64884e-31	-0.983563	0.24	0.502	1.39592e-26	30	SEPT1
8.97342e-31	0.284743	0.997	0.943	1.44831e-26	30	CFL1
1.0154e-30	0.332346	0.283	0.091	1.63886e-26	30	TP53I11
1.2554e-30	0.277542	0.398	0.154	2.02621e-26	30	SLC5A10
1.64648e-30	0.320755	0.322	0.113	2.65742e-26	30	SLC25A38
3.58736e-30	0.387406	0.948	0.693	5.79e-26	30	SSR4
3.90856e-30	0.292443	0.605	0.281	6.30841e-26	30	RAB5C
4.23857e-30	0.392847	0.976	0.748	6.84105e-26	30	LSP1
4.82861e-30	0.252303	0.207	0.057	7.79338e-26	30	VAT1
6.70074e-30	0.250355	0.213	0.06	1.0815e-25	30	PRXL2A
7.11868e-30	0.430998	0.416	0.17	1.14896e-25	30	ENSSSCG00000029066
7.81653e-30	-0.491107	0.988	0.959	1.26159e-25	30	ARHGDIB
8.93411e-30	0.257358	0.267	0.084	1.44197e-25	30	ENSSSCG00000025271
1.15298e-29	0.251924	0.356	0.131	1.86091e-25	30	NFE2L2
1.64889e-29	0.335465	0.641	0.311	2.66131e-25	30	ENSSSCG00000007088
1.73292e-29	0.311285	0.79	0.412	2.79693e-25	30	LAT2
2.36126e-29	-0.307015	1	1	3.81107e-25	30	RPS27
2.74441e-29	0.260769	0.529	0.231	4.42947e-25	30	ENSSSCG00000026488
2.7475e-29	0.35247	0.781	0.423	4.43446e-25	30	CAPZA2
3.35123e-29	-0.326572	0.997	0.988	5.40889e-25	30	ENSSSCG00000008170
4.33672e-29	-1.0211	0.058	0.346	6.99947e-25	30	GPR174
7.46622e-29	0.301926	0.386	0.151	1.20505e-24	30	ENSSSCG00000007031
1.12262e-28	0.390661	0.736	0.4	1.8119e-24	30	CCNG1
1.58071e-28	0.356197	0.957	0.747	2.55127e-24	30	ENSSSCG00000000576
2.69699e-28	0.356361	0.872	0.539	4.35294e-24	30	ESD
1.02055e-27	0.415229	0.751	0.433	1.64716e-23	30	LAMTOR5
1.20597e-27	0.285396	0.571	0.272	1.94644e-23	30	RAB11A
1.38541e-27	0.256269	0.632	0.302	2.23606e-23	30	PAXX
2.01313e-27	0.401024	0.875	0.53	3.24919e-23	30	ENSSSCG00000003914
2.27952e-27	0.362651	0.739	0.405	3.67915e-23	30	AP2S1
2.89138e-27	0.315609	0.778	0.427	4.66669e-23	30	ATP6V0C
3.2157e-27	0.275844	0.371	0.147	5.19014e-23	30	CD86
3.34427e-27	0.305288	0.447	0.191	5.39766e-23	30	NFKBIA
3.92517e-27	0.315984	0.52	0.239	6.33522e-23	30	LAMP2
6.54143e-27	0.256978	0.313	0.115	1.05579e-22	30	ATP6V1C1
6.97005e-27	0.278321	0.626	0.308	1.12497e-22	30	RAB7A
7.13308e-27	0.303879	0.453	0.198	1.15128e-22	30	PIP4K2A
8.91091e-27	0.29321	0.678	0.345	1.43822e-22	30	SELENOT
1.58547e-26	-0.829153	0.498	0.627	2.55895e-22	30	EZR
1.67452e-26	0.306873	0.447	0.194	2.70268e-22	30	CNDP2
1.97482e-26	0.314305	0.742	0.395	3.18736e-22	30	ENSSSCG00000010517
2.14608e-26	0.385637	0.891	0.59	3.46377e-22	30	SEC61B
2.70694e-26	0.253537	0.343	0.13	4.369e-22	30	SLC46A3
3.77409e-26	0.290265	0.474	0.214	6.09139e-22	30	YKT6
3.96542e-26	0.37661	0.711	0.388	6.40019e-22	30	SLC25A5
5.16704e-26	-1.20001	0.094	0.36	8.3396e-22	30	CD247
6.04209e-26	0.261014	0.38	0.156	9.75193e-22	30	ENSSSCG00000007692
6.26083e-26	0.313739	0.693	0.364	1.0105e-21	30	ENSSSCG00000001038
7.31686e-26	-0.945549	0.353	0.528	1.18094e-21	30	ARPC5L
8.64229e-26	0.371917	0.933	0.663	1.39487e-21	30	ENSSSCG00000037081
1.84107e-25	-1.72752	0.067	0.325	2.97149e-21	30	CD79B
3.17052e-25	0.267447	0.663	0.333	5.11722e-21	30	ITGB7
3.55221e-25	0.34932	0.97	0.882	5.73327e-21	30	ENSSSCG00000014565
4.68935e-25	-1.14882	0.052	0.31	7.56862e-21	30	TRAT1
5.488e-25	0.304026	0.726	0.398	8.85763e-21	30	ENSSSCG00000013436
5.66775e-25	0.255549	0.447	0.197	9.14775e-21	30	ENSSSCG00000004666
9.29876e-25	0.326894	0.875	0.559	1.50082e-20	30	ENSSSCG00000004145
1.0763e-24	0.30847	0.249	0.087	1.73714e-20	30	ACAT2
1.37261e-24	0.302942	0.571	0.281	2.21539e-20	30	NPC2
1.38244e-24	-0.93303	0.122	0.372	2.23126e-20	30	SIT1
1.46065e-24	0.264728	0.769	0.411	2.35749e-20	30	SPCS3
1.80064e-24	-0.339814	1	0.996	2.90623e-20	30	ENSSSCG00000038507
2.4703e-24	-0.260629	0.994	0.995	3.98707e-20	30	ENSSSCG00000039544
2.81018e-24	-3.4351	0.085	0.339	4.53562e-20	30	CCL5
3.37331e-24	-0.823482	0.404	0.568	5.44453e-20	30	TRAF3IP3
4.04017e-24	-1.51307	0.033	0.282	6.52083e-20	30	MS4A1
1.24444e-23	-0.272793	1	0.998	2.00853e-19	30	RPS16
1.28005e-23	0.325497	0.851	0.513	2.06601e-19	30	COTL1
1.79571e-23	-0.865028	0.036	0.281	2.89827e-19	30	IKZF3
1.98552e-23	0.305998	0.419	0.189	3.20463e-19	30	CCDC50
5.40075e-23	0.268531	0.985	0.773	8.71681e-19	30	ENSSSCG00000032556
7.60027e-23	0.274402	0.538	0.262	1.22668e-18	30	CANX
1.21955e-22	0.335733	0.842	0.522	1.96835e-18	30	GRB2
1.54257e-22	-0.845121	0.07	0.314	2.48971e-18	30	ABLIM1
4.612e-22	-1.97699	0.07	0.304	7.44378e-18	30	GZMB
5.82433e-22	-0.263124	1	0.999	9.40046e-18	30	B2M
1.0114e-21	0.291608	0.878	0.557	1.6324e-17	30	GNB2
1.86881e-21	0.328932	0.948	0.73	3.01626e-17	30	GAPDH
1.92977e-21	-0.839423	0.1	0.334	3.11465e-17	30	ENSSSCG00000039706
2.33882e-21	0.26011	0.982	0.847	3.77485e-17	30	PABPC1
9.57661e-21	0.263291	0.264	0.101	1.54567e-16	30	SQLE
1.00082e-20	0.274465	0.824	0.486	1.61532e-16	30	SEC61G
3.43144e-20	0.254167	0.833	0.487	5.53835e-16	30	NDUFB10
4.14328e-20	-0.868484	0.055	0.274	6.68725e-16	30	SKAP1
4.55886e-20	-0.770429	0.41	0.553	7.358e-16	30	CD37
1.25338e-19	-0.281852	1	0.998	2.02295e-15	30	RPL34
1.39513e-19	0.252496	0.772	0.445	2.25174e-15	30	CCND3
1.42424e-19	-0.856476	0.188	0.389	2.29873e-15	30	ARL6IP5
2.35062e-19	0.314678	0.897	0.624	3.7939e-15	30	SLC25A3
3.76625e-19	0.305868	0.748	0.453	6.07872e-15	30	PSMA6
4.44448e-19	0.319002	0.392	0.191	7.17339e-15	30	ENSSSCG00000017754
4.67575e-19	0.354953	0.672	0.374	7.54665e-15	30	FKBP11
8.20747e-19	-1.30412	0.03	0.234	1.32469e-14	30	ENSSSCG00000040849
1.27254e-18	-0.943131	0.261	0.439	2.05389e-14	30	TMEM123
1.65772e-18	0.253504	0.802	0.491	2.67556e-14	30	FAM49B
1.99252e-18	-0.824164	0.036	0.239	3.21593e-14	30	CD3D
3.19312e-18	-0.6308	0.559	0.643	5.1537e-14	30	ENSSSCG00000005453
4.21666e-18	-3.73563	0.088	0.292	6.80569e-14	30	GNLY
1.0135e-17	-0.883571	0.03	0.225	1.63579e-13	30	CD8A
1.26421e-17	0.280994	0.763	0.487	2.04044e-13	30	PPIB
2.29969e-17	0.260219	0.848	0.532	3.7117e-13	30	KARS
5.31134e-17	-0.643748	0.04	0.23	8.5725e-13	30	TUBA4A
8.17634e-17	-0.911784	0.082	0.274	1.31966e-12	30	CST7
1.08865e-16	-0.841544	0.094	0.284	1.75708e-12	30	BATF
3.00597e-16	-1.81659	0.617	0.618	4.85164e-12	30	ENSSSCG00000037775
4.31455e-16	-0.750555	0.079	0.265	6.96368e-12	30	ENSSSCG00000015664
5.15972e-16	-2.67326	0.112	0.311	8.3278e-12	30	HBB
5.79927e-16	-0.699601	0.058	0.244	9.36003e-12	30	S1PR1
1.52089e-15	-0.58245	0.416	0.198	2.45471e-11	30	LYZ
9.88953e-15	-0.660273	0.04	0.208	1.59617e-10	30	PVRIG
9.99213e-15	0.275582	0.371	0.19	1.61273e-10	30	ENSSSCG00000025644
2.6697e-14	-0.684223	0.094	0.264	4.30889e-10	30	TBC1D10C
3.84196e-14	-0.303273	1	0.991	6.20092e-10	30	TPT1
4.86648e-14	0.294105	0.666	0.434	7.85449e-10	30	STAT1
1.90527e-13	-0.62183	0.064	0.226	3.07511e-09	30	GYPC
6.01242e-13	0.263935	0.851	0.575	9.70405e-09	30	GABARAPL2
6.56356e-13	-0.708485	0.468	0.541	1.05936e-08	30	ENSSSCG00000001398
8.35947e-13	-0.612225	0.103	0.264	1.34922e-08	30	HMOX2
1.3269e-12	-2.42855	0.112	0.285	2.14162e-08	30	ENSSSCG00000007978
2.41391e-12	-1.2664	0.088	0.238	3.89605e-08	30	ENSSSCG00000029596
2.77652e-12	-0.646206	0.091	0.244	4.4813e-08	30	LBH
1.00837e-11	-0.796946	0.058	0.201	1.62751e-07	30	ENSSSCG00000000663
1.20239e-11	-0.337227	0.976	0.918	1.94066e-07	30	ENSSSCG00000001341
1.30013e-11	-0.610721	0.134	0.28	2.0984e-07	30	ACP5
2.07168e-11	-0.30928	0.942	0.9	3.34369e-07	30	CORO1A
2.29455e-11	-0.662749	0.283	0.399	3.70341e-07	30	SLC9A3R1
3.03861e-11	-0.681944	0.17	0.313	4.90432e-07	30	ENSSSCG00000036096
3.16007e-11	-0.680376	0.283	0.403	5.10036e-07	30	ENSSSCG00000034868
1.04711e-10	-1.11549	0.243	0.36	1.69004e-06	30	STMN1
1.30151e-10	-0.791137	0.176	0.305	2.10064e-06	30	S100A13
1.82883e-10	-0.589131	0.283	0.404	2.95173e-06	30	SAMD9
2.53737e-10	-2.23232	0.246	0.355	4.09531e-06	30	ENSSSCG00000036224
4.13931e-10	-0.60468	0.24	0.355	6.68084e-06	30	CD38
1.4985e-09	-0.486771	0.526	0.574	2.41858e-05	30	ENSSSCG00000006418
1.65948e-09	-0.477971	0.653	0.631	2.67839e-05	30	ENSSSCG00000007188
1.94234e-09	-0.546045	0.091	0.215	3.13494e-05	30	RASGRP1
2.46005e-09	-0.55458	0.161	0.287	3.97053e-05	30	DYNLT3
3.73792e-09	-0.593678	0.34	0.42	6.033e-05	30	PSIP1
4.29512e-09	-0.627115	0.134	0.253	6.93233e-05	30	SMC4
1.05936e-08	-0.528339	0.581	0.582	0.000170981	30	ENSSSCG00000000657
1.10456e-08	-0.525401	0.137	0.256	0.000178276	30	RHOH
2.48629e-08	-0.7493	0.24	0.339	0.000401287	30	RDX
2.59816e-08	-0.493039	0.1	0.215	0.000419343	30	STK38
2.74054e-08	-0.557606	0.486	0.525	0.000442323	30	PNRC1
4.07568e-08	-0.482034	0.091	0.204	0.000657814	30	SPTBN1
1.32167e-07	-0.470862	0.167	0.276	0.00213318	30	CALCOCO2
2.24774e-07	-0.624129	0.158	0.257	0.00362786	30	LAT
3.25852e-07	-0.564236	0.316	0.386	0.00525926	30	MRPS25
3.94052e-07	-0.533753	0.167	0.268	0.00636	30	ENSSSCG00000006919
6.20262e-07	-1.32029	0.322	0.375	0.010011	30	NKG7
7.54589e-07	-0.439095	0.131	0.23	0.0121791	30	PSTPIP1
7.86881e-07	-0.473254	0.596	0.572	0.0127003	30	PNISR
8.97798e-07	-0.488691	0.119	0.218	0.0144905	30	SAMHD1
9.03987e-07	-0.456148	0.134	0.233	0.0145904	30	ENSSSCG00000027778
1.00091e-06	-0.529773	0.231	0.314	0.0161548	30	ENSSSCG00000022912
2.49617e-06	-0.566211	0.292	0.355	0.0402881	30	ENSSSCG00000001097
0	2.55032	0.692	0.064	0	20	CXCL10
0	2.01501	0.991	0.123	0	20	AIF1
0	1.9995	1	0.143	0	20	FOLR1
0	1.867	1	0.267	0	20	TYROBP
0	1.80451	0.967	0.103	0	20	ENSSSCG00000034555
0	1.70052	0.937	0.081	0	20	CSF1R
0	1.63878	1	0.355	0	20	CTSS
0	1.61343	0.84	0.158	0	20	FOS
0	1.60923	0.937	0.214	0	20	CEBPB
0	1.60453	0.81	0.116	0	20	CD300C
0	1.54735	0.992	0.349	0	20	CTSZ
0	1.53823	0.918	0.138	0	20	GLUL
0	1.49599	0.923	0.09	0	20	ENSSSCG00000026653
0	1.48827	0.992	0.228	0	20	ANXA1
0	1.48754	0.997	0.344	0	20	PSAP
0	1.48581	0.95	0.245	0	20	ENSSSCG00000039731
0	1.4789	0.857	0.126	0	20	CD9
0	1.47177	0.98	0.109	0	20	FCN1
0	1.40926	0.997	0.297	0	20	FCER1G
0	1.40479	0.991	0.368	0	20	SLA-DMB
0	1.38358	0.904	0.153	0	20	CASP1
0	1.38073	0.929	0.173	0	20	ANXA5
0	1.37761	0.953	0.205	0	20	CFD
0	1.34259	0.975	0.349	0	20	TXNIP
0	1.30348	0.972	0.183	0	20	LYZ
0	1.29265	0.79	0.087	0	20	ECM1
0	1.27707	0.871	0.197	0	20	DUSP1
0	1.27256	0.987	0.274	0	20	SPI1
0	1.26342	0.854	0.1	0	20	TSPAN13
0	1.2196	0.739	0.061	0	20	RAMP2
0	1.21297	0.922	0.227	0	20	PYCARD
0	1.19085	0.998	0.476	0	20	CD63
0	1.17992	0.793	0.084	0	20	CFP
0	1.16609	0.808	0.203	0	20	IRF7
0	1.15798	0.95	0.288	0	20	LAMP1
0	1.15571	0.816	0.121	0	20	NAGK
0	1.13274	0.802	0.093	0	20	ENSSSCG00000003226
0	1.08872	0.794	0.094	0	20	GRN
0	1.05924	0.739	0.081	0	20	CHPT1
0	1.0583	0.843	0.189	0	20	CTSB
0	1.04345	0.714	0.061	0	20	NFAM1
0	1.04014	0.724	0.073	0	20	ENSSSCG00000037426
0	1.03902	0.79	0.09	0	20	HNMT
0	1.03126	0.589	0.055	0	20	MARCKS
0	1.01603	0.554	0.059	0	20	MS4A2
0	1.00924	0.71	0.072	0	20	ENSSSCG00000025271
0	0.999774	0.606	0.088	0	20	HK3
0	0.994988	0.667	0.052	0	20	TBXAS1
0	0.989478	0.807	0.192	0	20	ENSSSCG00000014997
0	0.979849	0.71	0.077	0	20	ENSSSCG00000030088
0	0.977715	0.681	0.063	0	20	IGSF6
0	0.976534	0.757	0.152	0	20	TNFRSF1B
0	0.973186	0.683	0.082	0	20	CORO1B
0	0.948896	0.716	0.102	0	20	AKR7A2
0	0.943518	0.997	0.192	0	20	CST3
0	0.936271	0.581	0.046	0	20	ENSSSCG00000034284
0	0.932986	0.589	0.043	0	20	SERPING1
0	0.931563	0.766	0.18	0	20	ENSSSCG00000017754
0	0.925772	0.609	0.071	0	20	ENSSSCG00000033703
0	0.913971	0.672	0.082	0	20	ENSSSCG00000033457
0	0.910172	0.593	0.054	0	20	C5AR1
0	0.906591	0.754	0.144	0	20	MPP1
0	0.903738	0.802	0.167	0	20	SERPINB1
0	0.903671	0.598	0.078	0	20	LGMN
0	0.903576	0.805	0.175	0	20	FGL2
0	0.884281	0.735	0.134	0	20	ALOX5AP
0	0.883055	0.615	0.087	0	20	IFIT2
0	0.879312	0.733	0.142	0	20	LRPAP1
0	0.863577	0.477	0.056	0	20	ENSSSCG00000038406
0	0.856817	0.564	0.066	0	20	IFIT5
0	0.85584	0.692	0.109	0	20	SPINT2
0	0.842448	0.565	0.048	0	20	PRCP
0	0.831543	0.62	0.079	0	20	TIMP2
0	0.829037	0.579	0.078	0	20	ENSSSCG00000024518
0	0.816087	0.705	0.137	0	20	TNFRSF1A
0	0.810031	0.51	0.065	0	20	ENSSSCG00000030300
0	0.806868	0.645	0.09	0	20	IFNGR1
0	0.783682	0.477	0.061	0	20	FCGR1A
0	0.769575	0.526	0.046	0	20	ENSSSCG00000028461
0	0.764364	0.673	0.133	0	20	GM2A
0	0.758424	0.516	0.061	0	20	CD14
0	0.757874	0.454	0.026	0	20	CD68
0	0.752782	0.386	0.041	0	20	CCL14
0	0.751706	0.553	0.07	0	20	CCR2
0	0.748072	0.462	0.049	0	20	HMOX1
0	0.747916	0.509	0.044	0	20	ENSSSCG00000027665
0	0.747684	0.529	0.072	0	20	GMPR
0	0.743016	0.575	0.095	0	20	MILR1
0	0.740141	0.611	0.107	0	20	PPT1
0	0.739177	0.623	0.115	0	20	HEXB
0	0.735887	0.477	0.032	0	20	CIDEB
0	0.727471	0.584	0.082	0	20	SCARB2
0	0.723571	0.516	0.049	0	20	BLVRA
0	0.712573	0.479	0.031	0	20	EPB41L2
0	0.711934	0.54	0.061	0	20	CARD9
0	0.703993	0.593	0.093	0	20	ENSSSCG00000003236
0	0.695127	0.527	0.059	0	20	ACER3
0	0.689265	0.595	0.099	0	20	UNC93B1
0	0.682472	0.482	0.038	0	20	PTPRO
0	0.677155	0.783	0.128	0	20	PLBD1
0	0.674147	0.477	0.051	0	20	CCDC88A
0	0.672441	0.454	0.03	0	20	ACVRL1
0	0.664057	0.51	0.052	0	20	KMO
0	0.659468	0.513	0.057	0	20	GNG11
0	0.651914	0.551	0.09	0	20	NCF2
0	0.648906	0.535	0.084	0	20	GALK1
0	0.640143	0.469	0.059	0	20	SLC49A3
0	0.634316	0.507	0.054	0	20	C19orf38
0	0.631203	0.444	0.048	0	20	TFEC
0	0.622286	0.488	0.064	0	20	LGALS8
0	0.621201	0.421	0.04	0	20	TLR4
0	0.601509	0.435	0.039	0	20	LTBR
0	0.592225	0.446	0.057	0	20	PSTPIP2
0	0.591258	0.419	0.039	0	20	FAM111B
0	0.589569	0.479	0.065	0	20	HEBP1
0	0.589128	0.336	0.021	0	20	STXBP1
0	0.573269	0.308	0.014	0	20	ENSSSCG00000017920
0	0.571469	0.48	0.066	0	20	PRKCD
0	0.564824	0.254	0.016	0	20	APOE
0	0.563622	0.44	0.04	0	20	SLC7A7
0	0.547843	0.394	0.045	0	20	ASAH1
0	0.538572	0.394	0.042	0	20	PAK1
0	0.534709	0.38	0.04	0	20	SLC39A8
0	0.52678	0.385	0.039	0	20	SLC11A1
0	0.524904	0.341	0.03	0	20	CLIC2
0	0.509086	0.353	0.038	0	20	ENSSSCG00000039956
0	0.507527	0.344	0.027	0	20	ENSSSCG00000003272
0	0.501971	0.377	0.042	0	20	SLC2A6
0	0.496622	0.339	0.033	0	20	GNB4
0	0.464897	0.311	0.025	0	20	TLR8
0	0.450738	0.327	0.028	0	20	ENSSSCG00000031951
0	0.446885	0.322	0.027	0	20	ACP2
0	0.434884	0.301	0.027	0	20	TNIP3
0	0.424527	0.228	0.015	0	20	FXYD6
0	0.423333	0.294	0.022	0	20	RAB20
0	0.405528	0.256	0.01	0	20	TCF7L2
0	0.393836	0.224	0.013	0	20	KIT
0	0.377107	0.267	0.016	0	20	SHTN1
0	0.369292	0.259	0.019	0	20	HSD3B7
0	0.343624	0.218	0.01	0	20	AXL
1.3425e-306	1.21089	0.904	0.264	2.1668e-302	20	LGALS1
6.20728e-306	0.323441	0.221	0.015	1.00185e-301	20	ARHGAP22
8.10464e-306	1.1551	0.965	0.368	1.30809e-301	20	IFI30
8.40765e-306	0.401239	0.248	0.019	1.357e-301	20	ICAM1
7.39803e-305	0.526568	0.407	0.051	1.19404e-300	20	VAT1
3.58081e-303	1.40666	1	0.618	5.77943e-299	20	IFITM3
8.34813e-303	0.340907	0.206	0.013	1.34739e-298	20	TNS3
8.22606e-301	1.42829	1	0.61	1.32769e-296	20	ENSSSCG00000036618
1.00976e-299	0.739982	0.586	0.105	1.62975e-295	20	LIPA
9.19823e-296	0.525662	0.312	0.032	1.48459e-291	20	CD163
8.37737e-293	0.633165	0.405	0.053	1.35211e-288	20	FBP1
6.78951e-291	1.07642	0.981	0.418	1.09583e-286	20	ATP6V0C
1.02344e-290	0.617698	0.509	0.082	1.65183e-286	20	CYBRD1
1.75387e-290	0.973106	0.895	0.271	2.83074e-286	20	NPC2
7.62708e-288	0.339927	0.239	0.019	1.23101e-283	20	PLAUR
6.0505e-287	1.20193	0.796	0.231	9.76551e-283	20	LAP3
4.87483e-286	0.605412	0.52	0.085	7.86798e-282	20	EMILIN2
9.62638e-285	0.543595	0.458	0.068	1.5537e-280	20	ENSSSCG00000022773
2.03239e-284	0.860933	0.673	0.144	3.28028e-280	20	MX2
3.41369e-284	0.567903	0.529	0.088	5.5097e-280	20	ANXA4
1.40736e-283	0.831478	0.757	0.184	2.27148e-279	20	CNDP2
7.63896e-282	0.672483	0.543	0.097	1.23293e-277	20	GNG10
6.51682e-281	0.843135	0.785	0.198	1.05181e-276	20	PLAAT3
4.93313e-280	0.640073	0.495	0.08	7.96208e-276	20	LPAR6
1.06466e-279	0.589515	0.452	0.068	1.71837e-275	20	GP91-PHOX
2.98688e-278	1.05653	0.306	0.032	4.82082e-274	20	CCL11
8.41732e-278	0.341629	0.245	0.02	1.35855e-273	20	SBF2
4.43149e-277	1.13151	0.849	0.263	7.15242e-273	20	IFIT1
6.14076e-276	1.69002	0.3	0.032	9.91118e-272	20	ISG12(A)
3.40094e-275	0.409388	0.27	0.025	5.48912e-271	20	SLC46A2
3.90584e-275	0.500196	0.228	0.018	6.30403e-271	20	CCL21
1.09823e-273	0.60452	0.466	0.074	1.77255e-269	20	GSDMD
6.3507e-272	1.10389	0.989	0.455	1.025e-267	20	SLA-DMA
1.0043e-271	0.473037	0.323	0.036	1.62094e-267	20	PGLYRP1
3.06952e-270	0.603693	0.48	0.079	4.95421e-266	20	PDXK
9.53256e-270	0.68541	0.675	0.145	1.53855e-265	20	TMEM173
3.76129e-267	1.06791	0.992	0.525	6.07073e-263	20	ENSSSCG00000027826
1.87235e-265	0.62656	0.438	0.066	3.02198e-261	20	SGK1
2.6802e-265	1.29038	0.312	0.036	4.32584e-261	20	ENSSSCG00000009239
3.48635e-264	0.978379	0.584	0.118	5.62697e-260	20	TIMP1
1.10792e-263	0.668274	0.54	0.102	1.78818e-259	20	WARS
4.96574e-260	0.516901	0.363	0.047	8.0147e-256	20	PDCD1LG2
1.00498e-259	0.783489	0.606	0.128	1.62204e-255	20	PEA15
1.89647e-259	0.722117	0.567	0.113	3.06091e-255	20	OAS2
6.80326e-259	0.517027	0.389	0.055	1.09805e-254	20	CCRL2
1.40277e-256	0.320455	0.221	0.018	2.26407e-252	20	GPBAR1
1.01962e-255	0.95264	0.915	0.305	1.64567e-251	20	CTSH
2.38598e-254	0.328071	0.25	0.023	3.85097e-250	20	STAP1
2.28533e-253	0.885208	0.779	0.213	3.68852e-249	20	C15orf48
2.64731e-253	0.957233	0.962	0.406	4.27276e-249	20	TALDO1
4.72052e-253	0.459248	0.356	0.047	7.61892e-249	20	SGPP1
3.35867e-251	0.417682	0.322	0.039	5.42089e-247	20	TNFSF13B
8.05423e-250	0.919352	0.932	0.343	1.29995e-245	20	ATP6V0B
1.58042e-249	0.847361	0.865	0.267	2.5508e-245	20	LAPTM4A
2.51143e-249	0.653504	0.595	0.123	4.05344e-245	20	OTULINL
1.52977e-247	0.529648	0.463	0.076	2.46904e-243	20	SERPINB10
7.13213e-246	0.603655	0.571	0.114	1.15113e-241	20	RARA
6.23403e-245	0.455638	0.287	0.032	1.00617e-240	20	OLFM1
5.84728e-244	0.751453	0.84	0.238	9.4375e-240	20	IRF5
3.70006e-243	0.489218	0.438	0.071	5.9719e-239	20	DBNDD2
1.19974e-242	0.954055	0.727	0.202	1.93639e-238	20	FBXO39
1.68057e-242	1.00967	0.975	0.489	2.71244e-238	20	CSTB
6.17871e-241	0.959989	0.892	0.315	9.97244e-237	20	ENSSSCG00000035224
1.28684e-240	0.69579	0.622	0.14	2.07695e-236	20	ICAM2
1.62283e-240	1.00791	0.995	0.618	2.61925e-236	20	ITM2B
9.23001e-240	0.940572	0.987	0.458	1.48972e-235	20	TSPO
4.79022e-239	0.462715	0.35	0.048	7.73141e-235	20	TENT5A
1.08073e-238	0.39102	0.259	0.027	1.74429e-234	20	IL13RA1
5.32774e-237	0.355896	0.245	0.024	8.59898e-233	20	HLX
7.24968e-236	0.556194	0.501	0.092	1.1701e-231	20	F13A1
2.65044e-235	1.13099	0.777	0.252	4.2778e-231	20	BST2
7.72554e-235	0.354916	0.234	0.022	1.2469e-230	20	ENSSSCG00000013144
3.8297e-234	0.894239	0.937	0.351	6.18114e-230	20	SH3BGRL
4.25455e-234	1.11781	1	0.64	6.86684e-230	20	HLA-DRA
1.40756e-233	0.365922	0.253	0.026	2.27181e-229	20	MITF
1.96819e-233	0.442508	0.342	0.046	3.17666e-229	20	TLR2
2.88141e-232	0.908977	0.998	0.721	4.6506e-228	20	ENSSSCG00000033909
5.45311e-232	0.546689	0.479	0.087	8.80132e-228	20	ENSSSCG00000039175
9.03889e-230	0.521611	0.407	0.065	1.45888e-225	20	FGD4
1.26301e-228	0.469689	0.419	0.069	2.0385e-224	20	KYNU
3.00983e-228	0.495969	0.443	0.076	4.85787e-224	20	IFNGR2
5.81432e-228	0.386748	0.3	0.037	9.38432e-224	20	ZNF385A
1.31035e-225	0.968973	1	0.9	2.1149e-221	20	ENSSSCG00000014540
9.70171e-225	0.483115	0.457	0.081	1.56586e-220	20	FGD2
2.84658e-224	0.379145	0.283	0.033	4.59438e-220	20	ENSSSCG00000001850
1.1768e-223	0.419521	0.322	0.043	1.89936e-219	20	PRAM1
2.59267e-223	0.797439	0.724	0.193	4.18457e-219	20	CD1D
3.47735e-223	1.06157	1	0.609	5.61245e-219	20	ENSSSCG00000001455
6.43109e-221	0.623732	0.653	0.158	1.03798e-216	20	RGS10
1.06798e-220	1.4628	0.945	0.56	1.72372e-216	20	VIM
9.32266e-220	-1.33373	0.867	0.93	1.50468e-215	20	RAC2
5.92005e-219	0.653168	0.711	0.188	9.55497e-215	20	DNASE1L1
2.43608e-217	0.458012	0.278	0.033	3.93184e-213	20	TREM1
4.43883e-216	0.672035	0.51	0.106	7.16427e-212	20	STX11
3.6652e-215	0.353896	0.246	0.027	5.91563e-211	20	CCR1
1.0728e-212	0.645502	0.56	0.124	1.7315e-208	20	ENSSSCG00000003278
1.44775e-211	0.551849	0.451	0.085	2.33667e-207	20	MBOAT7
7.6717e-210	0.374076	0.259	0.03	1.23821e-205	20	QPCT
5.73003e-208	0.451315	0.413	0.073	9.24826e-204	20	RAB31
6.53992e-208	0.674944	0.532	0.116	1.05554e-203	20	ENSSSCG00000006350
2.34872e-207	0.352457	0.25	0.028	3.79083e-203	20	ENSSSCG00000035675
1.598e-206	0.350705	0.261	0.031	2.57918e-202	20	RBM47
6.28808e-206	0.712558	0.81	0.253	1.0149e-201	20	LY96
8.67854e-205	0.590874	0.586	0.138	1.40072e-200	20	ENSSSCG00000001927
1.65724e-204	0.75685	0.827	0.273	2.67478e-200	20	EIF4EBP1
2.19699e-204	0.859193	0.892	0.321	3.54595e-200	20	ANXA2
5.59441e-204	0.441337	0.408	0.072	9.02938e-200	20	RALB
1.53937e-203	0.272935	0.201	0.019	2.48454e-199	20	BCL2L14
1.03671e-202	0.507907	0.526	0.112	1.67325e-198	20	AGTRAP
1.72294e-202	0.479464	0.421	0.077	2.78083e-198	20	ABHD12
3.33493e-200	0.365771	0.243	0.028	5.38258e-196	20	CPM
1.03833e-199	0.290697	0.212	0.021	1.67587e-195	20	DRAM1
2.09791e-199	0.610342	0.554	0.127	3.38602e-195	20	PMAIP1
1.11354e-198	0.648419	0.702	0.196	1.79725e-194	20	THEMIS2
2.36425e-198	0.82416	0.998	0.669	3.81589e-194	20	GMFG
1.19859e-197	0.952395	0.997	0.567	1.93452e-193	20	ENSSSCG00000001456
3.64414e-197	0.781553	0.895	0.336	5.88164e-193	20	FCGRT
4.82901e-197	0.378522	0.251	0.03	7.79403e-193	20	ENSSSCG00000013101
8.66612e-197	0.561976	0.589	0.142	1.39871e-192	20	TNFAIP8L2
6.98516e-196	0.791466	0.981	0.429	1.12741e-191	20	S100A11
1.50662e-195	0.367381	0.215	0.022	2.43168e-191	20	ATF3
1.37076e-194	0.328536	0.248	0.029	2.21241e-190	20	APP
1.99334e-192	0.875493	0.863	0.325	3.21725e-188	20	ZFP36L1
6.26533e-192	0.508062	0.526	0.118	1.01123e-187	20	MFSD1
2.22002e-191	0.586682	0.397	0.074	3.58312e-187	20	CALHM6
3.11717e-191	0.895715	1	0.572	5.03111e-187	20	SLA-DQB1
3.29775e-191	0.313484	0.221	0.024	5.32256e-187	20	ARHGEF10L
3.39295e-191	0.436699	0.345	0.056	5.47623e-187	20	ANG
4.17248e-191	0.617893	0.76	0.222	6.73439e-187	20	NCF4
3.21401e-190	0.506736	0.524	0.117	5.18742e-186	20	FAM129A
7.28777e-190	0.312327	0.272	0.036	1.17625e-185	20	TMEM106A
6.69985e-189	0.456456	0.383	0.07	1.08136e-184	20	GGH
8.19612e-189	0.503869	0.54	0.124	1.32285e-184	20	NFE2L2
1.94781e-188	0.520535	0.546	0.128	3.14376e-184	20	TMEM243
5.97433e-187	0.542075	0.622	0.157	9.64257e-183	20	RNF13
1.13941e-186	0.400303	0.345	0.057	1.839e-182	20	BLVRB
3.10666e-186	0.327692	0.254	0.032	5.01415e-182	20	ADAM9
3.31723e-186	0.650143	0.677	0.196	5.35401e-182	20	CHMP5
6.23461e-186	0.899943	0.9	0.426	1.00627e-181	20	STAT1
5.91087e-185	0.805208	0.799	0.284	9.54014e-181	20	SSR1
2.14841e-184	0.401131	0.342	0.057	3.46754e-180	20	CXorf21
1.6546e-183	0.607069	0.669	0.191	2.67052e-179	20	ATG3
9.03127e-183	0.732506	0.786	0.26	1.45765e-178	20	ADGRE5
1.39051e-182	0.495484	0.484	0.105	2.24428e-178	20	MCUB
4.47817e-182	0.447156	0.458	0.096	7.22776e-178	20	GLMP
1.10693e-181	0.35059	0.265	0.036	1.78658e-177	20	ENSSSCG00000012523
2.02676e-181	0.406496	0.294	0.044	3.27119e-177	20	AMBN
5.63544e-180	-0.725895	1	0.996	9.0956e-176	20	ENSSSCG00000038507
9.51979e-179	0.38414	0.272	0.037	1.53649e-174	20	DUSP6
9.23495e-178	0.76154	0.918	0.397	1.49052e-173	20	AP2S1
2.02444e-177	0.711729	0.995	0.666	3.26745e-173	20	SRGN
3.45389e-177	1.12793	0.97	0.54	5.57458e-173	20	IFI6
6.32895e-177	0.488846	0.452	0.097	1.02149e-172	20	ASRGL1
3.5792e-176	0.534163	0.538	0.132	5.77683e-172	20	ENSSSCG00000008222
1.77084e-174	0.615512	0.689	0.203	2.85813e-170	20	LYN
6.47507e-174	0.416499	0.435	0.089	1.04508e-169	20	HACD4
3.89197e-172	0.768673	0.972	0.524	6.28164e-168	20	ENSSSCG00000003914
1.01333e-171	0.610212	0.765	0.245	1.63552e-167	20	EVI2B
1.54152e-171	0.630826	0.769	0.255	2.48801e-167	20	LAMTOR1
3.13689e-171	0.4915	0.471	0.107	5.06294e-167	20	ATP6V1B2
4.11285e-171	0.506777	0.556	0.14	6.63814e-167	20	SNAP23
8.57415e-171	0.332876	0.203	0.023	1.38387e-166	20	TSPAN12
1.30119e-170	0.330419	0.322	0.053	2.10013e-166	20	ARRB1
3.34565e-170	-0.513297	1	1	5.39989e-166	20	ENSSSCG00000035080
9.34556e-169	-0.541294	1	0.998	1.50837e-164	20	ENSSSCG00000036296
2.56406e-167	0.805111	0.768	0.296	4.13839e-163	20	RAC1
3.12414e-167	-0.663101	0.998	0.998	5.04236e-163	20	RPL34
3.25086e-167	0.582944	0.611	0.167	5.24689e-163	20	ENSSSCG00000004024
3.62893e-167	0.713119	1	0.881	5.85709e-163	20	ENSSSCG00000014565
1.26409e-166	0.322771	0.223	0.028	2.04023e-162	20	C9orf72
6.12715e-166	0.310963	0.297	0.047	9.88921e-162	20	EHD4
1.26328e-165	0.585041	0.526	0.132	2.03893e-161	20	BCL2A1
1.37199e-165	0.574194	0.653	0.188	2.2144e-161	20	ZEB2
4.09539e-165	0.424836	0.394	0.079	6.60996e-161	20	FES
6.47041e-165	0.667394	0.846	0.309	1.04432e-160	20	ENSSSCG00000004414
9.0742e-165	0.549667	0.659	0.192	1.46458e-160	20	RNF149
1.19565e-164	0.290537	0.22	0.027	1.92978e-160	20	NLRP3
2.69776e-161	0.374626	0.334	0.06	4.35418e-157	20	CSF2RB
3.75064e-161	-0.499214	1	1	6.05353e-157	20	ENSSSCG00000034448
5.3374e-161	0.781367	0.972	0.771	8.61456e-157	20	GPX1
6.46928e-160	-0.912981	0.975	0.959	1.04414e-155	20	ARHGDIB
1.31128e-158	0.432153	0.479	0.113	2.11641e-154	20	FAM49A
5.72722e-156	-0.541275	1	0.998	9.24373e-152	20	RPS16
3.09332e-154	0.328469	0.29	0.048	4.99262e-150	20	SLC15A3
5.94574e-154	0.528447	0.619	0.18	9.59643e-150	20	LITAF
1.7916e-153	-0.535013	0.998	0.999	2.89165e-149	20	ENSSSCG00000034617
2.18301e-153	0.409062	0.356	0.07	3.52337e-149	20	DHRS9
2.55094e-153	0.586669	0.634	0.199	4.11722e-149	20	ENSSSCG00000006260
5.71124e-153	0.389047	0.397	0.085	9.21795e-149	20	MAPKAPK3
1.77656e-152	0.423091	1	0.999	2.86737e-148	20	B2M
2.53501e-152	0.39515	0.372	0.075	4.09151e-148	20	ENSSSCG00000037566
3.3808e-151	0.281551	0.234	0.033	5.45662e-147	20	RXRA
9.5887e-151	0.603562	0.7	0.233	1.54762e-146	20	CDC26
9.10654e-150	0.45351	0.421	0.096	1.46979e-145	20	MFSD14B
7.54327e-149	0.691832	0.871	0.366	1.21748e-144	20	PRDX2
1.30466e-148	0.392374	0.363	0.074	2.10573e-144	20	DRAM2
3.51672e-148	0.699931	0.973	0.533	5.67599e-144	20	ESD
3.59938e-148	0.330386	0.294	0.051	5.8094e-144	20	CSF3R
5.51103e-148	0.682575	0.987	0.726	8.8948e-144	20	GAPDH
1.86487e-147	0.351293	0.32	0.059	3.00989e-143	20	GNS
4.47567e-147	0.615282	0.936	0.404	7.22374e-143	20	LAT2
6.06458e-147	0.403805	0.425	0.097	9.78824e-143	20	GIMAP8
2.74016e-146	0.513151	0.673	0.217	4.42262e-142	20	C18orf32
4.05532e-146	0.477377	1	0.998	6.54529e-142	20	ENSSSCG00000001229
1.05763e-145	0.406234	0.364	0.076	1.70702e-141	20	JAK2
2.36276e-145	0.589966	0.76	0.274	3.8135e-141	20	PGK1
5.14793e-145	0.370022	0.212	0.029	8.30875e-141	20	ENSSSCG00000005437
1.1439e-144	0.732217	0.845	0.356	1.84625e-140	20	SNX10
1.327e-144	0.387074	0.504	0.127	2.14178e-140	20	ENSSSCG00000014013
2.7039e-144	0.643334	0.81	0.315	4.36409e-140	20	RNH1
1.81423e-143	-1.42892	0.363	0.73	2.92816e-139	20	LIMD2
2.58512e-143	0.714794	0.669	0.233	4.17238e-139	20	LGALS3BP
3.48348e-143	0.39069	0.204	0.027	5.62233e-139	20	ENSSSCG00000029990
3.33377e-142	0.356453	0.323	0.061	5.38071e-138	20	FHL3
6.16066e-142	0.51094	0.639	0.198	9.9433e-138	20	TMEM50B
8.12495e-142	0.71476	0.928	0.516	1.31137e-137	20	GRB2
3.53968e-141	0.267801	0.203	0.027	5.71305e-137	20	RAB32
1.29858e-140	0.301222	0.281	0.049	2.09591e-136	20	CARD6
2.33125e-139	0.510086	0.659	0.211	3.76264e-135	20	SQSTM1
4.54895e-139	-0.561859	1	0.999	7.34201e-135	20	ENSSSCG00000003042
6.17945e-139	0.474474	0.543	0.152	9.97364e-135	20	DNASE2
1.19041e-138	0.387225	0.414	0.098	1.92133e-134	20	STX12
1.47578e-138	0.701476	0.841	0.354	2.38191e-134	20	ZFP36
3.46151e-138	0.396959	0.394	0.09	5.58687e-134	20	STARD3
1.2767e-137	0.435143	0.452	0.115	2.0606e-133	20	MSRB1
2.56718e-137	0.409824	0.482	0.127	4.14343e-133	20	ENSSSCG00000008137
2.80317e-137	0.467712	0.564	0.166	4.52432e-133	20	RAB1A
8.18084e-137	0.460028	0.518	0.144	1.32039e-132	20	ARF3
1.20342e-136	0.352507	0.564	0.155	1.94232e-132	20	HCK
1.79283e-136	0.537992	0.661	0.22	2.89363e-132	20	RAB10
2.29555e-136	0.354454	0.363	0.078	3.70502e-132	20	SH3BP2
3.59469e-136	0.397045	0.345	0.072	5.80183e-132	20	SLC16A3
1.09912e-134	0.655535	0.962	0.572	1.77398e-130	20	TMBIM6
1.93405e-134	0.517073	0.604	0.191	3.12156e-130	20	ENSSSCG00000004666
3.49645e-134	0.750751	0.942	0.482	5.64327e-130	20	S100A6
4.1982e-134	0.480237	0.468	0.124	6.77589e-130	20	MYD88
1.11976e-133	0.570795	0.719	0.26	1.80729e-129	20	AKR1A1
4.04013e-132	0.850863	0.824	0.39	6.52076e-128	20	ISG15
4.05518e-132	0.358853	0.386	0.089	6.54506e-128	20	PLEKHO1
5.86524e-132	0.583626	0.531	0.157	9.4665e-128	20	ENSSSCG00000033089
7.12245e-132	0.354573	0.397	0.093	1.14956e-127	20	CLTB
1.14083e-131	-0.891486	0.881	0.901	1.84131e-127	20	CORO1A
1.32944e-130	0.332937	0.325	0.066	2.14571e-126	20	NPL
2.14814e-130	0.394225	0.349	0.077	3.46709e-126	20	CNIH4
5.86925e-130	0.305265	0.319	0.064	9.47297e-126	20	DOK3
1.46174e-129	0.400757	0.432	0.108	2.35926e-125	20	SLC25A38
2.2442e-129	0.321664	0.3	0.059	3.62214e-125	20	GLA
5.27256e-129	-0.510656	0.998	0.998	8.50991e-125	20	RPS3A
5.75913e-129	-0.429544	1	0.999	9.29523e-125	20	ENSSSCG00000003930
1.24706e-128	0.462033	0.63	0.204	2.01276e-124	20	SKAP2
5.12419e-128	0.502419	0.728	0.264	8.27045e-124	20	ATOX1
1.116e-127	0.311211	0.286	0.054	1.80122e-123	20	OSBPL11
1.19634e-127	0.465917	0.516	0.146	1.9309e-123	20	MTSS1
2.17055e-127	0.572994	0.826	0.338	3.50327e-123	20	VMP1
7.00749e-127	0.414576	0.493	0.139	1.13101e-122	20	TMEM60
1.63857e-126	0.353675	0.367	0.084	2.64466e-122	20	CD180
2.32343e-125	0.536849	0.997	0.754	3.75002e-121	20	ENO1
2.50495e-125	0.548196	0.994	0.77	4.04299e-121	20	ENSSSCG00000032556
5.66863e-125	-0.48574	1	0.997	9.14917e-121	20	HSD11B1L
6.46135e-125	0.301163	0.232	0.038	1.04286e-120	20	SH2B3
8.15789e-125	0.682545	1	0.793	1.31668e-120	20	CD74
1.2651e-124	0.38651	0.369	0.087	2.04187e-120	20	BRI3
2.77909e-124	0.455185	0.575	0.179	4.48545e-120	20	ATP6AP1
3.9358e-124	0.367305	0.353	0.081	6.35239e-120	20	PLXNC1
5.6549e-124	0.586397	0.768	0.308	9.12702e-120	20	TWF2
6.11801e-124	0.601466	0.945	0.474	9.87447e-120	20	TMEM59
7.34961e-124	0.416654	0.523	0.154	1.18623e-119	20	G6PD
1.09975e-123	0.440787	0.527	0.157	1.775e-119	20	RRBP1
1.70288e-123	0.337773	0.322	0.069	2.74846e-119	20	TREX1
3.58007e-123	0.44119	0.642	0.211	5.77823e-119	20	PLD4
1.1396e-122	0.357384	0.386	0.094	1.83931e-118	20	FADD
1.38962e-122	0.47667	0.636	0.217	2.24285e-118	20	ENSSSCG00000013232
3.52859e-122	0.330437	0.325	0.07	5.69515e-118	20	BACH1
3.73981e-121	0.519401	0.989	0.78	6.03605e-117	20	GABARAP
7.76392e-120	0.487977	0.779	0.31	1.2531e-115	20	TPM4
1.23972e-119	0.511011	0.722	0.271	2.0009e-115	20	TKT
2.25861e-119	0.479944	0.728	0.269	3.6454e-115	20	ARRB2
7.06584e-119	0.601565	0.92	0.479	1.14043e-114	20	RHOG
8.19399e-119	0.449296	0.543	0.167	1.32251e-114	20	CMTM3
2.64607e-118	0.252184	0.203	0.031	4.27075e-114	20	KIAA0930
7.16625e-118	0.351925	0.256	0.048	1.15663e-113	20	AHR
9.49199e-118	0.482927	0.626	0.218	1.53201e-113	20	H2AFY
2.80552e-117	0.331579	0.272	0.053	4.5281e-113	20	INSIG1
4.31764e-116	0.458304	0.749	0.281	6.96867e-112	20	CCPG1
1.42003e-115	0.604315	0.801	0.351	2.29192e-111	20	UBE2L6
3.62506e-115	0.275541	0.206	0.033	5.85085e-111	20	RASGRP3
5.48015e-115	-1.914	0.033	0.515	8.84496e-111	20	LTB
5.76106e-115	0.274599	0.212	0.035	9.29835e-111	20	TPST1
1.04031e-114	0.354434	0.399	0.102	1.67905e-110	20	NCF1
3.33547e-114	0.347235	0.286	0.059	5.38344e-110	20	NFKBIZ
7.99488e-114	-1.3902	0.033	0.509	1.29037e-109	20	SEPT1
1.16936e-113	0.278523	0.254	0.048	1.88735e-109	20	P4HA1
7.47701e-113	0.259779	0.237	0.043	1.20679e-108	20	CTNNA1
3.43903e-112	0.355332	0.378	0.095	5.55059e-108	20	NAGA
3.76385e-112	0.551425	0.829	0.357	6.07486e-108	20	ENSSSCG00000001038
7.09994e-112	0.303844	0.355	0.086	1.14593e-107	20	VAMP4
1.08894e-111	0.39516	0.435	0.121	1.75756e-107	20	GINM1
1.15083e-111	0.357747	0.537	0.166	1.85745e-107	20	FGR
1.59638e-111	0.412517	0.447	0.13	2.57655e-107	20	ENSSSCG00000008317
1.67069e-111	0.425237	0.694	0.251	2.6965e-107	20	IL10RA
1.77575e-111	0.418141	0.656	0.233	2.86606e-107	20	LAMP2
2.96165e-111	0.486605	0.449	0.131	4.7801e-107	20	ENSSSCG00000032591
4.92604e-111	0.270586	0.257	0.05	7.95063e-107	20	TBC1D9
6.6868e-111	0.433459	0.722	0.271	1.07925e-106	20	SNX2
9.51847e-111	0.411323	0.283	0.058	1.53628e-106	20	ENSSSCG00000022258
1.3245e-110	0.409623	0.484	0.143	2.13775e-106	20	VSIR
2.15341e-110	-0.390685	1	0.999	3.47561e-106	20	ENSSSCG00000035768
5.31622e-110	0.618695	0.848	0.448	8.58038e-106	20	PSMA6
5.78993e-110	0.380609	0.532	0.166	9.34494e-106	20	ATP6AP2
3.19765e-109	0.503116	0.826	0.356	5.16101e-105	20	SDCBP
4.40833e-109	-0.432949	0.998	0.997	7.11505e-105	20	RPL9
7.07106e-109	0.518113	0.724	0.285	1.14127e-104	20	MAT2B
8.68593e-109	0.476595	1	0.839	1.40191e-104	20	ARPC1B
2.04972e-108	0.25128	0.237	0.044	3.30825e-104	20	STOM
6.0722e-108	0.385822	0.534	0.168	9.80053e-104	20	ENSSSCG00000013720
6.64143e-108	0.403617	0.619	0.215	1.07193e-103	20	RASSF4
1.78458e-107	0.279826	0.218	0.039	2.88031e-103	20	KLF10
7.17308e-107	0.282178	0.276	0.058	1.15773e-102	20	TAX1BP3
3.34637e-106	-1.45116	0.05	0.501	5.40105e-102	20	ETS1
5.23804e-106	-0.363493	1	0.999	8.45419e-102	20	ENSSSCG00000035811
6.2186e-106	0.292098	0.273	0.057	1.00368e-101	20	NAAA
6.39916e-106	0.496317	1	0.761	1.03282e-101	20	LAPTM5
6.82505e-106	0.528283	0.763	0.321	1.10156e-101	20	ENSSSCG00000031897
7.14711e-106	0.531125	0.876	0.417	1.15354e-101	20	CAPZA2
1.18093e-105	0.659092	0.231	0.043	1.90602e-101	20	SLPI
2.56204e-105	-2.12206	0.061	0.505	4.13513e-101	20	ENSSSCG00000033721
7.11972e-105	-0.451939	1	0.995	1.14912e-100	20	RPS18
1.72531e-104	0.38845	0.493	0.153	2.78466e-100	20	DCXR
2.45854e-104	0.308689	0.399	0.107	3.96808e-100	20	TMBIM1
1.32264e-103	0.543147	0.688	0.278	2.13474e-99	20	NMI
2.30144e-103	0.420696	0.801	0.321	3.71452e-99	20	ENSSSCG00000014361
4.71592e-103	0.324775	0.339	0.084	7.6115e-99	20	TRAF7
1.12069e-102	0.277528	0.273	0.059	1.8088e-98	20	COQ2
1.19599e-101	0.635975	0.754	0.357	1.93034e-97	20	SNX6
1.92008e-101	0.647846	0.505	0.176	3.09901e-97	20	ISG20
3.719e-101	0.472962	0.892	0.411	6.00246e-97	20	MGST1
5.20089e-101	0.314194	0.328	0.082	8.39424e-97	20	GSTO1
1.85669e-100	0.300338	0.298	0.069	2.99669e-96	20	ENSSSCG00000023264
3.47587e-100	0.492547	0.728	0.303	5.61006e-96	20	SDHB
2.28091e-99	-2.08883	0.041	0.475	3.68138e-95	20	ENSSSCG00000037885
4.06624e-98	0.40563	0.471	0.151	6.5629e-94	20	ENSSSCG00000007692
4.51399e-98	0.369937	0.535	0.18	7.28559e-94	20	CREM
5.80634e-98	0.335004	0.402	0.114	9.37144e-94	20	NOTCH2
5.82922e-98	-1.72811	0.046	0.473	9.40837e-94	20	CD3G
8.3267e-98	0.289483	0.303	0.072	1.34393e-93	20	GBA
1.68489e-97	0.340249	0.386	0.108	2.71941e-93	20	PPP1R35
1.92204e-97	0.387148	0.586	0.208	3.10217e-93	20	C20orf27
4.67231e-97	0.64503	0.786	0.383	7.5411e-93	20	SLC25A5
1.363e-95	0.291142	0.333	0.085	2.19987e-91	20	TCIRG1
3.44467e-95	0.333771	0.353	0.095	5.5597e-91	20	TMEM87A
3.50785e-95	0.275558	0.286	0.066	5.66167e-91	20	ATG16L2
7.43849e-95	-0.435881	1	0.988	1.20057e-90	20	ENSSSCG00000008170
8.29083e-95	0.288777	0.256	0.055	1.33814e-90	20	ENSSSCG00000040566
9.0691e-95	0.28288	0.301	0.073	1.46375e-90	20	RNF2
1.01848e-94	-0.419646	1	0.996	1.64383e-90	20	RPL6
1.04203e-94	0.274386	0.336	0.087	1.68184e-90	20	NFE2L1
1.60954e-94	0.380073	0.451	0.143	2.5978e-90	20	CD86
1.74494e-94	0.454855	0.538	0.186	2.81634e-90	20	NFKBIA
1.99571e-94	-0.373267	0.998	0.999	3.22108e-90	20	RPS26
3.87419e-94	0.3648	0.491	0.162	6.25294e-90	20	ATP6V1D
5.39319e-94	0.311391	0.388	0.111	8.70461e-90	20	DEGS1
9.46369e-94	0.35064	0.432	0.133	1.52744e-89	20	SERTAD1
3.46933e-93	-2.0776	0.044	0.461	5.59949e-89	20	CTSW
3.5949e-93	-0.373525	1	0.998	5.80218e-89	20	RPL35
4.06511e-93	0.318767	0.29	0.07	6.56108e-89	20	DDX58
7.24411e-93	0.376786	0.59	0.216	1.1692e-88	20	GPI
7.52191e-93	0.352184	0.501	0.166	1.21404e-88	20	CMPK2
1.59689e-92	0.340198	0.451	0.14	2.57737e-88	20	LFNG
2.16993e-92	0.292876	0.458	0.143	3.50227e-88	20	RAB8B
4.24809e-91	0.572218	0.992	0.865	6.85642e-87	20	FTL
9.11602e-91	0.30941	0.386	0.113	1.47133e-86	20	AP2A2
1.14706e-90	0.493104	0.703	0.304	1.85136e-86	20	TAP1
1.49924e-90	-0.435057	0.997	0.994	2.41977e-86	20	RPS6
2.01526e-90	0.293818	0.284	0.07	3.25263e-86	20	CASP3
2.68627e-90	0.528865	0.797	0.388	4.33564e-86	20	POMP
4.90392e-90	0.342247	0.491	0.165	7.91493e-86	20	ATP1A1
5.12483e-90	0.442125	0.768	0.339	8.27147e-86	20	SELENOT
3.00232e-89	0.510479	0.741	0.329	4.84574e-85	20	CYBA
6.12612e-89	0.27215	1	0.999	9.88756e-85	20	TMSB10
6.52364e-89	-1.05707	0.634	0.73	1.05292e-84	20	PTPRCAP
1.31817e-88	0.296603	0.319	0.083	2.12753e-84	20	GPCPD1
2.44769e-88	0.588293	0.889	0.49	3.95057e-84	20	ENSSSCG00000018063
2.80525e-88	0.385832	0.584	0.22	4.52767e-84	20	ENSSSCG00000025007
3.5589e-88	0.368041	0.801	0.343	5.74407e-84	20	NDFIP1
1.06727e-87	0.26752	0.314	0.082	1.72258e-83	20	FUCA2
1.1615e-87	-0.30392	1	0.999	1.87466e-83	20	ENSSSCG00000014569
2.16986e-86	0.344444	0.578	0.214	3.50216e-82	20	NDUFS6
3.3334e-86	0.256519	0.454	0.145	5.38011e-82	20	LMO4
4.11996e-86	0.500221	0.793	0.388	6.64962e-82	20	DYNLL1
4.33623e-86	0.338653	0.571	0.209	6.99868e-82	20	RTN4
6.61472e-86	0.255563	0.251	0.057	1.06762e-81	20	FUCA1
9.30161e-86	0.312599	0.363	0.105	1.50128e-81	20	MX1
1.11138e-85	0.286084	0.338	0.094	1.79376e-81	20	DHX58
3.15271e-85	0.317612	0.455	0.15	5.08848e-81	20	PHF11
4.87832e-85	0.305753	0.396	0.122	7.87361e-81	20	GSR
1.5491e-84	0.388191	1	0.94	2.50025e-80	20	H3F3B
5.55836e-84	0.355962	0.521	0.188	8.9712e-80	20	DYNLT1
9.6128e-84	0.304819	0.43	0.14	1.55151e-79	20	LAMTOR3
1.02729e-83	0.269633	0.375	0.112	1.65805e-79	20	ATP6V1C1
1.14682e-83	0.325253	0.553	0.205	1.85097e-79	20	ENSSSCG00000002036
3.26798e-83	-0.332416	1	0.999	5.27452e-79	20	ENSSSCG00000031088
6.05085e-83	0.309944	0.447	0.148	9.76607e-79	20	TM9SF2
2.40354e-82	0.395153	0.779	0.354	3.87931e-78	20	REEP5
1.89626e-81	0.271087	0.295	0.078	3.06056e-77	20	HACD2
2.16368e-81	0.351189	0.538	0.2	3.49218e-77	20	ENSSSCG00000006324
2.31281e-81	0.256501	0.24	0.056	3.73288e-77	20	DPYSL2
2.39221e-81	0.485629	0.752	0.356	3.86103e-77	20	EPSTI1
2.45682e-81	0.375058	0.808	0.368	3.96532e-77	20	CAPG
4.31172e-81	0.352258	0.553	0.209	6.95912e-77	20	MRPL24
4.33221e-81	0.429373	0.73	0.331	6.99219e-77	20	LAMTOR2
5.25708e-81	0.27227	0.355	0.104	8.48492e-77	20	QKI
1.15349e-80	0.254822	0.35	0.101	1.86173e-76	20	SUMF1
1.16018e-80	0.284312	0.349	0.102	1.87253e-76	20	COLGALT1
1.42513e-80	0.409892	0.851	0.411	2.30016e-76	20	CD99
6.08124e-80	0.488831	0.232	0.054	9.81513e-76	20	ENSSSCG00000029160
8.43227e-80	0.339144	0.548	0.206	1.36097e-75	20	CDIPT
3.95386e-79	0.473006	0.978	0.795	6.38153e-75	20	COX7C
4.23867e-79	0.333018	0.564	0.217	6.84121e-75	20	ENSSSCG00000016451
5.48248e-79	0.29657	0.432	0.144	8.84873e-75	20	NPTN
6.12802e-79	0.617592	0.661	0.293	9.89063e-75	20	ENSSSCG00000011676
6.81451e-79	0.410636	0.915	0.512	1.09986e-74	20	CTSC
1.02691e-78	0.292811	0.316	0.089	1.65743e-74	20	PICALM
1.93175e-78	0.271176	0.454	0.153	3.11785e-74	20	IL10RB
3.5184e-78	0.295227	0.537	0.201	5.67869e-74	20	GNB1
4.03586e-78	0.5077	0.961	0.671	6.51389e-74	20	S100A10
6.15825e-78	0.335996	0.636	0.256	9.93941e-74	20	MVP
1.19044e-77	0.333237	0.526	0.196	1.92137e-73	20	AAMP
1.38653e-77	-1.33063	0.086	0.444	2.23785e-73	20	TMEM123
1.68267e-77	0.258037	0.465	0.159	2.71583e-73	20	LXN
2.02752e-77	-1.51234	0.041	0.407	3.27242e-73	20	CD3E
8.23532e-77	0.295146	0.447	0.155	1.32918e-72	20	MESD
9.19467e-77	-0.387074	0.997	0.994	1.48402e-72	20	RPL7
1.62819e-76	-1.19514	0.104	0.453	2.6279e-72	20	ENSSSCG00000033733
3.65969e-76	0.411186	0.711	0.325	5.90674e-72	20	IDH2
4.617e-76	0.276463	0.345	0.103	7.45183e-72	20	ENSSSCG00000034802
5.29366e-76	0.439363	0.964	0.607	8.54396e-72	20	ITGB2
5.49786e-76	-0.340216	1	1	8.87355e-72	20	RPL37
1.08644e-75	0.360965	0.628	0.26	1.75351e-71	20	KIF5B
1.60835e-75	0.27859	0.476	0.168	2.59587e-71	20	RBPJ
1.63676e-75	0.252026	0.268	0.07	2.64173e-71	20	LPCAT3
1.93225e-75	-0.331935	1	0.999	3.11865e-71	20	RPS11
1.95669e-75	0.346299	0.606	0.245	3.1581e-71	20	KDELR1
2.24753e-75	0.268447	0.495	0.174	3.62751e-71	20	CD40
3.09651e-75	0.290607	0.33	0.099	4.99777e-71	20	ENSSSCG00000012746
6.09778e-75	0.432042	0.862	0.451	9.84182e-71	20	GNAI2
6.58788e-75	0.445435	0.928	0.571	1.06328e-70	20	ENSSSCG00000016990
1.08816e-74	0.259953	0.311	0.089	1.7563e-70	20	FBXO6
1.21663e-74	0.302069	0.537	0.204	1.96364e-70	20	PET100
1.31974e-74	0.277964	0.427	0.143	2.13006e-70	20	ZNF655
2.1011e-74	0.342484	0.496	0.186	3.39117e-70	20	ENSSSCG00000012654
2.77123e-74	-1.1572	0.019	0.378	4.47276e-70	20	SIT1
3.83112e-74	0.308896	0.513	0.193	6.18343e-70	20	RAB8A
1.10073e-73	0.276489	0.336	0.1	1.77658e-69	20	TET2
2.87078e-73	0.424061	0.837	0.441	4.63344e-69	20	CD47
6.32496e-73	0.340002	0.59	0.24	1.02085e-68	20	ENSSSCG00000040801
8.25572e-73	0.338173	0.582	0.238	1.33247e-68	20	EIF2S1
1.98665e-72	0.309737	0.7	0.303	3.20645e-68	20	RAB7A
2.05696e-72	0.288355	0.546	0.211	3.31993e-68	20	COMMD3
7.52284e-72	0.304901	0.647	0.272	1.21419e-67	20	MPC2
2.62706e-71	0.261956	0.416	0.141	4.24007e-67	20	WSB1
9.1124e-71	0.269517	0.43	0.151	1.47074e-66	20	SLC5A10
1.33866e-70	0.277561	0.429	0.15	2.1606e-66	20	GNA15
1.69053e-70	0.256494	0.381	0.124	2.72852e-66	20	PLSCR1
2.19125e-70	-0.333127	0.998	0.995	3.53668e-66	20	ENSSSCG00000039544
2.30832e-70	0.340351	0.515	0.201	3.72563e-66	20	USP15
7.60457e-70	-1.26988	0.02	0.365	1.22738e-65	20	LCK
2.41073e-69	0.312008	0.463	0.17	3.89092e-65	20	ENSSSCG00000017146
2.58011e-69	-0.312017	1	1	4.1643e-65	20	ENSSSCG00000040273
5.31747e-69	0.299749	0.666	0.283	8.58239e-65	20	FYB1
7.84378e-69	-0.559664	0.961	0.912	1.26599e-64	20	RPL5
1.08514e-68	0.410402	0.953	0.588	1.75142e-64	20	EIF4A1
1.4858e-68	0.292376	0.553	0.217	2.39808e-64	20	PDCD4
1.8446e-68	-2.16152	0.414	0.623	2.97718e-64	20	ENSSSCG00000037775
3.40961e-68	-0.437204	0.986	0.96	5.5031e-64	20	RPL22
8.1301e-68	0.284771	0.432	0.156	1.3122e-63	20	NSMCE1
1.10047e-67	-1.39092	0.03	0.365	1.77616e-63	20	CD247
2.39564e-67	0.273192	0.422	0.15	3.86657e-63	20	SMAP2
3.10747e-67	0.265004	0.466	0.174	5.01546e-63	20	ACTR10
3.62534e-67	0.426061	0.951	0.62	5.8513e-63	20	SLC25A3
5.07735e-67	0.282467	0.608	0.254	8.19484e-63	20	CTSA
1.78147e-66	-1.11631	0.019	0.35	2.87529e-62	20	GPR174
8.78929e-66	-0.273902	1	0.998	1.41859e-61	20	ENSSSCG00000029830
1.41714e-65	0.317598	0.556	0.232	2.28726e-61	20	ENSSSCG00000007609
2.86666e-64	-0.303982	1	0.996	4.62679e-60	20	ENSSSCG00000011272
5.64807e-64	0.286827	0.57	0.241	9.11598e-60	20	NDUFS3
6.91385e-64	0.557977	0.722	0.367	1.1159e-59	20	ENSSSCG00000031912
1.1054e-63	0.304203	0.782	0.377	1.78411e-59	20	VPS29
1.33728e-63	0.26114	0.531	0.214	2.15837e-59	20	ENSSSCG00000033757
1.55515e-63	0.274838	0.691	0.307	2.51002e-59	20	RAB5A
5.28427e-63	0.351409	0.586	0.261	8.52882e-59	20	HSBP1
8.26473e-63	-0.306706	1	0.998	1.33393e-58	20	RPL23
9.39401e-63	0.276338	0.597	0.253	1.51619e-58	20	TGFB1
1.3139e-62	0.331294	0.699	0.328	2.12063e-58	20	NDUFS7
1.36196e-62	0.356722	0.429	0.161	2.1982e-58	20	RSAD2
5.71478e-62	-0.322585	1	0.993	9.22365e-58	20	RPL17-C18orf32
1.13515e-61	-1.84666	0.016	0.329	1.83213e-57	20	CD79B
1.69584e-61	-0.2919	0.998	0.994	2.73708e-57	20	RPL7A
1.97766e-61	-0.371459	0.995	0.98	3.19195e-57	20	RPL3
3.04453e-61	0.259234	0.479	0.188	4.91387e-57	20	C21orf91
3.98329e-61	-0.322121	1	0.999	6.42903e-57	20	RPS15
7.36448e-61	0.282246	0.487	0.195	1.18863e-56	20	TRAPPC4
2.60239e-60	0.256139	0.479	0.191	4.20026e-56	20	ARL2
3.80883e-60	-2.72751	0.053	0.36	6.14745e-56	20	ENSSSCG00000036224
9.01757e-60	-1.08508	0.319	0.531	1.45544e-55	20	ARPC5L
1.71316e-59	0.344374	0.63	0.294	2.76504e-55	20	POLR2K
2.15347e-59	0.324082	0.648	0.298	3.4757e-55	20	IRF2
2.92903e-59	0.421917	0.867	0.507	4.72745e-55	20	ENSSSCG00000006061
5.62444e-59	0.25115	0.419	0.158	9.07784e-55	20	CNPY3
6.77425e-59	-0.263795	1	0.999	1.09336e-54	20	ENSSSCG00000013889
9.33133e-59	-0.267506	1	1	1.50608e-54	20	RPS20
1.12616e-58	0.411053	0.856	0.487	1.81762e-54	20	DNAJA1
7.89348e-58	-0.343115	1	0.982	1.27401e-53	20	ENSSSCG00000024974
1.53035e-57	0.295545	0.68	0.322	2.46998e-53	20	MAP1LC3B
4.53959e-56	0.362675	0.901	0.552	7.3269e-52	20	RHOA
4.71242e-56	-1.22632	0.02	0.313	7.60584e-52	20	TRAT1
1.43756e-55	-0.28479	1	0.996	2.32023e-51	20	ENSSSCG00000014855
1.56003e-55	0.297451	0.705	0.348	2.51789e-51	20	FERMT3
2.7275e-55	0.456888	0.969	0.741	4.40219e-51	20	HSPA8
5.00365e-55	0.294726	0.604	0.277	8.07588e-51	20	BAZ1A
6.06299e-55	0.327376	0.777	0.401	9.78566e-51	20	ENSSSCG00000013721
7.78799e-55	-0.96922	0.028	0.317	1.25698e-50	20	ABLIM1
1.76018e-54	0.268332	0.617	0.284	2.84093e-50	20	RILPL2
1.86755e-54	0.298873	0.65	0.305	3.01422e-50	20	ENSSSCG00000027085
2.0402e-54	-1.60129	0.002	0.285	3.29288e-50	20	MS4A1
2.76693e-54	0.299932	0.62	0.293	4.46583e-50	20	SRP19
2.2563e-53	-0.279822	1	0.999	3.64167e-49	20	RPL11
2.25706e-53	0.258193	0.531	0.232	3.64289e-49	20	MTCH1
4.20549e-53	-0.566058	0.852	0.808	6.78767e-49	20	TMA7
5.40483e-53	0.34883	0.904	0.546	8.7234e-49	20	ENSSSCG00000013366
2.08474e-52	0.355456	0.507	0.23	3.36477e-48	20	TMEM156
2.86131e-52	0.304951	0.997	0.88	4.61815e-48	20	SLC25A6
2.39643e-51	0.370728	0.873	0.533	3.86785e-47	20	ENSSSCG00000039582
6.74701e-51	-0.957029	0.17	0.425	1.08897e-46	20	PSIP1
2.21716e-50	-2.12137	0.038	0.308	3.5785e-46	20	GZMB
2.38126e-50	0.342834	0.716	0.377	3.84336e-46	20	MGST3
5.76791e-50	-1.5171	0.104	0.364	9.3094e-46	20	STMN1
8.28758e-50	0.345558	0.868	0.525	1.33762e-45	20	ENSSSCG00000000273
1.64562e-49	0.28023	0.786	0.408	2.65603e-45	20	BCAP31
2.18026e-49	-0.276773	0.998	0.99	3.51894e-45	20	ENSSSCG00000009303
4.00271e-49	0.252596	0.783	0.401	6.46038e-45	20	MCL1
1.80929e-48	-0.901704	0.022	0.284	2.92019e-44	20	IKZF3
2.0846e-48	-1.07477	0.017	0.278	3.36454e-44	20	CST7
4.03106e-48	0.315204	0.788	0.431	6.50614e-44	20	NDUFS8
9.52093e-48	0.281752	0.739	0.394	1.53668e-43	20	PSMB10
7.53226e-47	0.256191	0.305	0.112	1.21571e-42	20	USP18
9.95478e-47	-0.961186	0.148	0.392	1.6067e-42	20	ARL6IP5
2.78045e-46	-0.864741	0.099	0.357	4.48765e-42	20	ADD3
3.08285e-45	0.301519	0.972	0.755	4.97573e-41	20	UBE2D3
1.44282e-43	-0.87689	0.228	0.44	2.32871e-39	20	CNN2
1.66895e-43	0.296242	0.86	0.522	2.69368e-39	20	S100A4
1.86762e-43	-1.27783	0.25	0.448	3.01434e-39	20	SMC6
2.87253e-43	-0.898377	0.126	0.367	4.63627e-39	20	GNG2
6.90133e-43	-0.94387	0.038	0.277	1.11387e-38	20	SKAP1
8.98295e-43	-3.6173	0.1	0.342	1.44985e-38	20	CCL5
1.2448e-42	0.274857	0.98	0.802	2.0091e-38	20	ARPC3
2.17164e-42	-0.263803	0.998	0.987	3.50503e-38	20	RPLP2
7.95601e-42	0.285044	0.832	0.484	1.2841e-37	20	NDUFB10
1.66301e-41	0.262225	0.838	0.476	2.68411e-37	20	RABAC1
2.62553e-41	-0.260939	0.998	0.99	4.23761e-37	20	ENSSSCG00000025928
3.536e-41	0.267414	0.733	0.397	5.7071e-37	20	CLTA
4.32954e-41	0.271819	0.819	0.467	6.98787e-37	20	RBX1
4.46689e-41	-0.79663	0.435	0.638	7.20955e-37	20	ENSSSCG00000033734
6.50898e-41	0.297605	0.695	0.39	1.05055e-36	20	TAX1BP1
1.10934e-40	-0.40155	0.97	0.908	1.79047e-36	20	ENSSSCG00000033500
1.44141e-40	-1.35989	0.011	0.237	2.32644e-36	20	ENSSSCG00000040849
1.85861e-40	-0.794594	0.038	0.267	2.9998e-36	20	TBC1D10C
2.24344e-40	-0.825936	0.462	0.569	3.62092e-36	20	TRAF3IP3
2.79967e-40	-0.287692	0.998	0.972	4.51866e-36	20	ENSSSCG00000011952
3.55067e-40	0.262368	0.871	0.525	5.73078e-36	20	OSTF1
3.67423e-40	-0.805277	0.022	0.247	5.93021e-36	20	LBH
4.62156e-39	-0.273916	1	1	7.4592e-35	20	RPS27
6.9583e-39	-0.321775	0.989	0.96	1.12307e-34	20	ENSSSCG00000039046
1.34205e-38	-0.936751	0.011	0.228	2.16607e-34	20	CD8A
1.36816e-38	0.256449	0.893	0.553	2.20821e-34	20	GNB2
1.91784e-38	-0.724069	0.013	0.229	3.09539e-34	20	GYPC
4.58743e-38	-0.890284	0.083	0.307	7.40412e-34	20	ENSSSCG00000035256
8.61896e-38	0.29864	0.823	0.503	1.3911e-33	20	PSMB2
2.43984e-37	0.309757	0.939	0.645	3.9379e-33	20	ENSSSCG00000006395
2.88148e-37	0.301256	0.939	0.654	4.6507e-33	20	ENSSSCG00000032003
4.24359e-37	-0.869462	0.028	0.242	6.84916e-33	20	CD3D
1.45067e-36	-1.38808	0.03	0.241	2.34138e-32	20	ENSSSCG00000029596
1.86099e-35	-0.776047	0.038	0.246	3.00364e-31	20	S1PR1
3.36652e-35	0.261889	0.852	0.522	5.43356e-31	20	ARPC4
6.52796e-33	-0.86487	0.452	0.542	1.05361e-28	20	ENSSSCG00000001398
2.04148e-32	0.274626	0.909	0.629	3.29496e-28	20	UCP2
7.73391e-32	0.303448	0.576	0.323	1.24825e-27	20	ENSSSCG00000003253
1.78063e-31	-0.713567	0.061	0.252	2.87393e-27	20	SNRPN
2.16639e-30	-0.674848	0.834	0.749	3.49656e-26	20	ENSSSCG00000009327
3.2617e-30	-0.628792	0.752	0.68	5.26438e-26	20	NAP1L1
5.68003e-30	-0.698206	0.03	0.21	9.16757e-26	20	PVRIG
7.27527e-30	-0.283343	0.986	0.929	1.17423e-25	20	RPS10-NUDT3
5.92837e-29	-0.879888	0.028	0.203	9.5684e-25	20	ENSSSCG00000000663
1.08828e-28	-1.30198	0.027	0.201	1.75648e-24	20	ENSSSCG00000038719
1.00716e-27	-0.688479	0.105	0.283	1.62555e-23	20	ACP5
1.90996e-27	-3.84971	0.118	0.293	3.08268e-23	20	GNLY
2.28444e-27	-0.608219	0.036	0.206	3.68709e-23	20	SPTBN1
3.16407e-27	-0.611366	0.761	0.693	5.10681e-23	20	LCP1
6.01619e-27	-0.809088	0.261	0.405	9.71013e-23	20	ENSSSCG00000034868
6.09584e-27	-0.303211	0.983	0.908	9.83868e-23	20	ENSSSCG00000006081
6.68247e-27	0.250954	0.392	0.203	1.07855e-22	20	TNFSF10
1.23324e-25	-0.658939	0.59	0.596	1.99045e-21	20	SEPT7
1.5198e-25	-0.619478	0.066	0.232	2.45296e-21	20	TUBA4A
4.88694e-24	-0.254284	0.984	0.949	7.88752e-20	20	ENSSSCG00000013064
5.29847e-24	-0.286329	0.987	0.96	8.55172e-20	20	ENSSSCG00000033697
1.553e-21	-0.588642	0.667	0.64	2.50654e-17	20	KLF2
4.31016e-21	-0.729609	0.246	0.368	6.9566e-17	20	TLE5
5.56213e-21	-0.474607	0.94	0.855	8.97727e-17	20	BTG1
6.33097e-21	-0.576064	0.072	0.217	1.02182e-16	20	RASGRP1
6.88298e-21	-0.524259	0.746	0.659	1.11091e-16	20	ENSSSCG00000005656
2.00694e-19	-0.694976	0.292	0.393	3.23921e-15	20	SEPT6
2.03483e-19	-0.712346	0.235	0.35	3.28421e-15	20	BIN1
2.20898e-19	-0.55456	0.956	0.884	3.5653e-15	20	ACTG1
4.6714e-19	-0.827771	0.182	0.306	7.53963e-15	20	S100A13
1.06009e-18	-0.388928	0.953	0.861	1.71098e-14	20	PTPRC
1.38862e-18	-0.41497	0.851	0.749	2.24124e-14	20	LSP1
1.64904e-18	-0.781192	0.363	0.428	2.66156e-14	20	SOD1
5.16818e-18	-0.669139	0.246	0.357	8.34144e-14	20	ENSSSCG00000001097
9.26412e-18	-0.682027	0.13	0.255	1.49523e-13	20	SMC4
4.05683e-17	-0.581505	0.586	0.572	6.54773e-13	20	PNISR
8.42649e-17	-0.778519	0.173	0.284	1.36004e-12	20	BATF
1.15848e-15	-0.372636	0.973	0.948	1.86978e-11	20	ACTB
1.24846e-15	0.304241	0.87	0.659	2.01502e-11	20	HSP90AA1
1.7491e-15	-0.556693	0.414	0.228	2.82304e-11	20	HIST1H2AB
5.40018e-15	-0.306053	0.917	0.817	8.71589e-11	20	MIF
5.60611e-15	0.620451	0.87	0.827	9.04826e-11	20	PLAC8
1.64111e-14	-1.56318	0.184	0.312	2.64876e-10	20	HBB
1.47588e-13	-0.499812	0.746	0.629	2.38207e-09	20	H2AFV
2.38709e-13	-0.543786	0.364	0.418	3.85277e-09	20	DDT
3.14903e-13	-0.540337	0.113	0.219	5.08253e-09	20	IVNS1ABP
4.02486e-13	-0.609323	0.221	0.309	6.49612e-09	20	RASGRP2
5.38498e-13	-0.550358	0.356	0.414	8.69136e-09	20	UNC119
6.98044e-13	-0.552523	0.104	0.207	1.12664e-08	20	ENSSSCG00000039658
1.71665e-12	-0.296746	0.873	0.75	2.77068e-08	20	SERBP1
9.28312e-12	-0.495147	0.121	0.216	1.4983e-07	20	STK38
1.82267e-11	-0.273686	0.942	0.806	2.94179e-07	20	NPM1
7.58717e-11	-0.532937	0.181	0.264	1.22457e-06	20	HMOX2
1.19749e-10	-0.366598	0.912	0.792	1.93276e-06	20	PFN1
1.40184e-10	-0.283274	0.951	0.816	2.26257e-06	20	EIF4A2
1.84357e-10	-1.63926	0.181	0.285	2.97552e-06	20	ENSSSCG00000007978
4.9802e-10	-0.369968	0.867	0.742	8.03804e-06	20	ARF6
1.50835e-09	-0.550239	0.352	0.386	2.43447e-05	20	MRPS25
2.07165e-09	-0.411823	0.749	0.629	3.34365e-05	20	ENSSSCG00000007188
2.30563e-09	-0.436375	0.181	0.256	3.72128e-05	20	HSH2D
2.39546e-09	-0.268258	0.95	0.81	3.86627e-05	20	ENSSSCG00000036350
8.35318e-09	-0.509201	0.149	0.223	0.00013482	20	ENSSSCG00000020777
9.18483e-09	-0.457599	0.157	0.228	0.000148243	20	ENSSSCG00000035209
1.21751e-08	-0.434697	0.725	0.624	0.000196506	20	EZR
1.75711e-08	-0.42448	0.157	0.227	0.000283597	20	HMGA1
2.07009e-08	-0.416611	0.736	0.617	0.000334113	20	SRSF2
2.5927e-08	-0.526703	0.438	0.447	0.000418462	20	ENSSSCG00000024263
3.39697e-08	-0.437845	0.187	0.255	0.000548271	20	GRK6
3.61744e-08	-0.498681	0.162	0.23	0.000583855	20	CHD3
4.57379e-08	-0.517936	0.273	0.319	0.000738209	20	SASH3
5.69754e-08	-0.448743	0.133	0.201	0.000919582	20	SLC44A2
6.67911e-08	-0.395339	0.157	0.227	0.00107801	20	SRPK1
7.82225e-08	-0.452279	0.749	0.623	0.00126251	20	JAK1
8.47885e-08	-0.741255	0.311	0.338	0.00136849	20	RDX
9.55821e-08	-0.557139	0.242	0.288	0.0015427	20	SERPINB9
1.50332e-07	-0.324835	0.943	0.826	0.00242636	20	DDX5
1.56151e-07	-0.545016	0.359	0.378	0.00252028	20	ATRX
2.19538e-07	-0.480784	0.556	0.515	0.00354335	20	SRSF5
2.86302e-07	-0.607709	0.405	0.41	0.00462091	20	HCST
6.14848e-07	-0.354262	0.757	0.637	0.00992364	20	HNRNPDL
1.03437e-06	-0.40665	0.143	0.205	0.0166947	20	EPB41
2.31681e-06	-0.283753	0.824	0.67	0.0373933	20	ENSSSCG00000008061
2.5345e-06	-0.494561	0.157	0.209	0.0409068	20	SMIM14
0	2.34157	1	0.1	0	13	FCN1
0	2.1621	0.995	0.174	0	13	LYZ
0	2.154	0.573	0.046	0	13	ENSSSCG00000022258
0	2.09956	0.973	0.115	0	13	PLBD1
0	2.00852	1	0.134	0	13	FOLR1
0	1.98518	1	0.337	0	13	PSAP
0	1.97689	0.492	0.064	0	13	CXCL10
0	1.9186	0.997	0.254	0	13	LGALS1
0	1.86186	1	0.259	0	13	TYROBP
0	1.80826	0.998	0.22	0	13	ANXA1
0	1.69387	0.795	0.072	0	13	ENSSSCG00000033457
0	1.68855	0.99	0.196	0	13	CFD
0	1.67247	1	0.476	0	13	S100A6
0	1.67075	0.982	0.114	0	13	AIF1
0	1.64144	0.286	0.029	0	13	ISG12(A)
0	1.62551	0.918	0.095	0	13	ENSSSCG00000034555
0	1.55247	0.92	0.078	0	13	HNMT
0	1.53305	0.995	0.554	0	13	VIM
0	1.52208	0.791	0.06	0	13	S100A12
0	1.50291	0.902	0.069	0	13	CHPT1
0	1.49305	0.447	0.034	0	13	SLPI
0	1.48147	0.894	0.082	0	13	ENSSSCG00000026653
0	1.4811	0.916	0.129	0	13	GLUL
0	1.46805	0.998	0.614	0	13	IFITM3
0	1.43282	0.943	0.164	0	13	ANXA5
0	1.39306	0.86	0.075	0	13	CSF1R
0	1.37748	0.888	0.146	0	13	CASP1
0	1.37406	1	0.289	0	13	FCER1G
0	1.34478	0.994	0.342	0	13	CTSZ
0	1.34376	0.915	0.207	0	13	CEBPB
0	1.34145	0.991	0.399	0	13	TALDO1
0	1.33447	0.856	0.112	0	13	NAGK
0	1.30584	0.972	0.312	0	13	ANXA2
0	1.30253	0.996	0.348	0	13	CTSS
0	1.27298	0.937	0.238	0	13	ENSSSCG00000039731
0	1.24638	0.794	0.152	0	13	FOS
0	1.23307	0.99	0.453	0	13	TSPO
0	1.22578	0.969	0.267	0	13	SPI1
0	1.22019	0.837	0.092	0	13	TSPAN13
0	1.18567	0.797	0.067	0	13	ENSSSCG00000030088
0	1.18127	0.948	0.281	0	13	LAMP1
0	1.17324	0.765	0.079	0	13	F13A1
0	1.17081	0.691	0.113	0	13	CD300C
0	1.17	0.815	0.258	0	13	IFIT1
0	1.15677	0.734	0.227	0	13	LAP3
0	1.15071	0.995	0.47	0	13	CD63
0	1.14122	0.97	0.343	0	13	SH3BGRL
0	1.12536	0.776	0.08	0	13	ECM1
0	1.12255	0.896	0.22	0	13	PYCARD
0	1.12199	0.528	0.032	0	13	CCL14
0	1.1202	0.72	0.063	0	13	SERPINB10
0	1.1127	0.754	0.064	0	13	ENSSSCG00000025271
0	1.10295	0.858	0.159	0	13	SERPINB1
0	1.09964	0.661	0.081	0	13	HK3
0	1.09956	0.995	0.423	0	13	S100A11
0	1.08737	0.994	0.614	0	13	ITM2B
0	1.08624	0.743	0.079	0	13	CFP
0	1.08315	0.748	0.122	0	13	CD9
0	1.07464	0.969	0.362	0	13	SLA-DMB
0	1.0657	0.685	0.063	0	13	ENSSSCG00000033703
0	1.06374	0.812	0.192	0	13	DUSP1
0	1.05301	0.717	0.066	0	13	ENSSSCG00000037426
0	1.03833	0.885	0.165	0	13	FGL2
0	1.03571	0.967	0.413	0	13	ATP6V0C
0	1.02826	0.918	0.344	0	13	TXNIP
0	1.02809	0.351	0.028	0	13	CCL11
0	1.01168	0.835	0.184	0	13	ENSSSCG00000014997
0	1.00633	0.997	0.723	0	13	GAPDH
0	1.00161	0.734	0.088	0	13	ENSSSCG00000003226
0	0.999682	0.576	0.047	0	13	S100A9
0	0.994836	0.978	0.484	0	13	CSTB
0	0.993101	0.769	0.174	0	13	ENSSSCG00000017754
0	0.990864	0.873	0.276	0	13	SSR1
0	0.98812	0.999	0.662	0	13	SRGN
0	0.980556	0.669	0.057	0	13	IGSF6
0	0.978405	0.718	0.089	0	13	GRN
0	0.977458	0.985	0.52	0	13	ENSSSCG00000027826
0	0.976429	0.76	0.127	0	13	ALOX5AP
0	0.962183	0.659	0.056	0	13	NFAM1
0	0.949554	0.714	0.2	0	13	IRF7
0	0.941414	0.64	0.058	0	13	RAMP2
0	0.934188	0.613	0.081	0	13	IFIT2
0	0.926326	0.601	0.049	0	13	C5AR1
0	0.910788	0.676	0.097	0	13	AKR7A2
0	0.909086	0.761	0.138	0	13	MPP1
0	0.900275	0.634	0.14	0	13	MX2
0	0.89447	0.763	0.135	0	13	LRPAP1
0	0.8901	0.925	0.338	0	13	ATP6V0B
0	0.88482	0.567	0.066	0	13	GMPR
0	0.88173	0.724	0.101	0	13	SPINT2
0	0.878659	0.592	0.061	0	13	VCAN
0	0.866864	0.561	0.061	0	13	IFIT5
0	0.865152	0.433	0.036	0	13	S100A8
0	0.86386	0.792	0.184	0	13	CTSB
0	0.860949	0.545	0.054	0	13	MS4A2
0	0.855105	0.744	0.146	0	13	TNFRSF1B
0	0.848551	1	0.899	0	13	ENSSSCG00000014540
0	0.836718	0.862	0.261	0	13	LAPTM4A
0	0.829283	0.62	0.074	0	13	TIMP2
0	0.826159	0.727	0.179	0	13	CNDP2
0	0.823126	0.676	0.108	0	13	HEXB
0	0.810498	0.554	0.046	0	13	ANG
0	0.81007	0.557	0.048	0	13	C19orf38
0	0.807414	0.831	0.267	0	13	PGK1
0	0.783379	0.581	0.064	0	13	CCR2
0	0.783083	0.552	0.055	0	13	CD14
0	0.765758	0.824	0.247	0	13	LY96
0	0.764855	0.639	0.093	0	13	UNC93B1
0	0.746915	0.491	0.043	0	13	ENSSSCG00000034284
0	0.745266	0.531	0.059	0	13	LGALS8
0	0.74315	0.506	0.057	0	13	CARD9
0	0.739755	0.612	0.113	0	13	TIMP1
0	0.735261	0.675	0.132	0	13	TNFRSF1A
0	0.733681	0.599	0.102	0	13	PPT1
0	0.731318	0.504	0.04	0	13	ENSSSCG00000039758
0	0.728178	0.547	0.074	0	13	ENSSSCG00000024518
0	0.726317	0.561	0.101	0	13	LIPA
0	0.722775	0.761	0.208	0	13	C15orf48
0	0.717575	0.386	0.026	0	13	LGALS3
0	0.70609	0.523	0.075	0	13	LPAR6
0	0.704817	0.533	0.075	0	13	LGMN
0	0.703659	0.567	0.084	0	13	NCF2
0	0.703269	0.704	0.183	0	13	ENSSSCG00000004666
0	0.702628	0.549	0.092	0	13	GNG10
0	0.700568	0.478	0.045	0	13	VAT1
0	0.69939	0.603	0.081	0	13	ANXA4
0	0.692735	0.468	0.055	0	13	SLC49A3
0	0.6914	0.565	0.079	0	13	EMILIN2
0	0.683126	0.414	0.03	0	13	PGLYRP1
0	0.682752	0.501	0.051	0	13	TBXAS1
0	0.681488	0.561	0.12	0	13	ENSSSCG00000003278
0	0.676717	0.532	0.08	0	13	CORO1B
0	0.675856	0.47	0.033	0	13	SLC39A8
0	0.673311	0.508	0.074	0	13	PDXK
0	0.668099	0.729	0.194	0	13	PLAAT3
0	0.668014	0.531	0.092	0	13	MILR1
0	0.665049	0.531	0.09	0	13	ASRGL1
0	0.664041	0.447	0.045	0	13	HMOX1
0	0.662551	0.495	0.065	0	13	SLC16A3
0	0.658347	0.46	0.062	0	13	SGK1
0	0.657087	0.434	0.058	0	13	FCGR1A
0	0.65109	0.452	0.043	0	13	ENSSSCG00000028461
0	0.649811	0.405	0.041	0	13	ASAH1
0	0.64844	0.557	0.099	0	13	MCUB
0	0.643606	0.434	0.036	0	13	TLR4
0	0.642013	0.432	0.034	0	13	SLC11A1
0	0.641878	0.474	0.047	0	13	CCDC88A
0	0.63968	0.459	0.056	0	13	ACER3
0	0.637086	0.461	0.047	0	13	PRCP
0	0.636204	0.491	0.071	0	13	ABHD12
0	0.634089	0.446	0.041	0	13	ENSSSCG00000027665
0	0.627629	0.585	0.111	0	13	FAM129A
0	0.62679	0.519	0.08	0	13	GALK1
0	0.619496	0.486	0.061	0	13	HEBP1
0	0.618581	0.292	0.023	0	13	PTI
0	0.613278	0.457	0.064	0	13	GP91-PHOX
0	0.611187	0.427	0.044	0	13	TFEC
0	0.600453	0.514	0.078	0	13	CYBRD1
0	0.598361	0.411	0.043	0	13	SERPING1
0	0.598187	0.489	0.08	0	13	SCARB2
0	0.595885	0.444	0.043	0	13	CSF3R
0	0.591193	0.372	0.027	0	13	CD163
0	0.588972	0.542	0.113	0	13	MFSD1
0	0.586984	0.633	0.141	0	13	TMEM173
0	0.583142	0.511	0.083	0	13	HACD4
0	0.578041	0.529	0.09	0	13	ENSSSCG00000003236
0	0.572998	0.387	0.034	0	13	ENSSSCG00000039956
0	0.56992	0.316	0.022	0	13	ENSSSCG00000029990
0	0.569306	0.475	0.07	0	13	GSDMD
0	0.568477	0.386	0.036	0	13	FAM111B
0	0.562611	0.402	0.036	0	13	PTPRO
0	0.554607	0.387	0.034	0	13	ENSSSCG00000033183
0	0.549402	0.331	0.028	0	13	OLFM1
0	0.547705	0.463	0.083	0	13	ENSSSCG00000039175
0	0.546927	0.998	0.183	0	13	CST3
0	0.54297	0.331	0.025	0	13	QPCT
0	0.53802	0.397	0.048	0	13	BLVRA
0	0.537809	0.499	0.09	0	13	IFNGR1
0	0.530957	0.344	0.035	0	13	NFE2
0	0.528043	0.418	0.053	0	13	PSTPIP2
0	0.527836	0.4	0.036	0	13	LTBR
0	0.520809	0.218	0.016	0	13	CCL21
0	0.517527	0.413	0.064	0	13	ALDH2
0	0.5094	0.36	0.031	0	13	CIDEB
0	0.505365	0.355	0.038	0	13	SLC7A7
0	0.497253	0.337	0.029	0	13	ACVRL1
0	0.496806	0.299	0.024	0	13	STEAP4
0	0.493147	0.344	0.039	0	13	PRAM1
0	0.489647	0.349	0.044	0	13	TENT5A
0	0.484051	0.354	0.04	0	13	SLC2A6
0	0.474077	0.42	0.056	0	13	GNG11
0	0.472476	0.374	0.051	0	13	KMO
0	0.467099	0.334	0.03	0	13	GNB4
0	0.457092	0.263	0.021	0	13	AGPAT2
0	0.450998	0.263	0.026	0	13	SULT1A3
0	0.449713	0.332	0.041	0	13	PAK1
0	0.447063	0.301	0.024	0	13	ENSSSCG00000035675
0	0.441794	0.298	0.03	0	13	TREM1
0	0.435825	0.32	0.036	0	13	TNFSF13B
0	0.434768	0.314	0.027	0	13	NRG1
0	0.427189	0.306	0.032	0	13	EPB41L2
0	0.418656	0.273	0.023	0	13	MITF
0	0.417345	0.281	0.027	0	13	ENSSSCG00000013101
0	0.414319	0.266	0.029	0	13	CLIC2
0	0.413439	0.281	0.031	0	13	ENSSSCG00000001850
0	0.393897	0.287	0.026	0	13	ENSSSCG00000031951
0	0.388076	0.226	0.013	0	13	AZU1
0	0.384865	0.265	0.024	0	13	IL13RA1
0	0.383662	0.263	0.023	0	13	SLC46A2
0	0.378721	0.237	0.02	0	13	TSPAN12
0	0.367658	0.24	0.02	0	13	EGFL7
0	0.365632	0.243	0.02	0	13	STXBP1
0	0.365509	0.273	0.023	0	13	NLRP3
0	0.362395	0.268	0.028	0	13	RBM47
0	0.354731	0.254	0.021	0	13	RAB20
0	0.334576	0.232	0.022	0	13	ARHGEF10L
0	0.279469	0.205	0.016	0	13	GPBAR1
4.11055e-305	0.889984	0.925	0.363	6.63443e-301	13	IFI30
6.86344e-305	0.850964	0.995	0.718	1.10776e-300	13	ENSSSCG00000033909
2.3216e-302	0.757853	0.82	0.263	3.74706e-298	13	TKT
1.01483e-299	0.788921	0.874	0.303	1.63793e-295	13	ENSSSCG00000004414
3.36898e-296	0.582269	0.584	0.134	5.43753e-292	13	ENSSSCG00000001927
3.56229e-296	0.506474	0.503	0.102	5.74954e-292	13	ATP6V1B2
6.22513e-296	0.556127	0.518	0.109	1.00474e-291	13	MSRB1
1.69851e-294	0.314708	0.214	0.02	2.74139e-290	13	COL18A1
1.26991e-293	0.391674	0.243	0.026	2.04963e-289	13	TNIP3
1.02015e-291	0.599418	0.496	0.103	1.64652e-287	13	STX11
1.0347e-291	0.517521	0.522	0.108	1.67001e-287	13	AGTRAP
1.13676e-289	0.583952	0.639	0.158	1.83473e-285	13	ATP6AP2
4.76537e-289	0.853062	0.971	0.45	7.69131e-285	13	SLA-DMA
7.50474e-288	0.573155	0.63	0.152	1.21126e-283	13	RNF13
7.80657e-286	0.477759	0.42	0.075	1.25998e-281	13	FES
8.40314e-286	0.442367	0.392	0.066	1.35627e-281	13	KYNU
6.02455e-284	-1.19624	0.892	0.93	9.72362e-280	13	RAC2
5.14742e-281	0.68772	0.682	0.193	8.30793e-277	13	ENSSSCG00000006260
1.26419e-278	0.560238	0.516	0.111	2.0404e-274	13	RARA
6.68185e-278	0.74814	0.997	0.751	1.07845e-273	13	ENO1
1.0346e-277	0.708627	0.816	0.267	1.66984e-273	13	EIF4EBP1
4.72294e-277	0.731128	0.825	0.273	7.62282e-273	13	CCPG1
2.25116e-275	0.672588	0.774	0.234	3.63337e-271	13	IRF5
1.11724e-272	0.656241	0.748	0.226	1.80322e-268	13	CDC26
5.19893e-272	0.409978	0.31	0.044	8.39107e-268	13	TLR2
2.03394e-271	0.576365	0.375	0.065	3.28278e-267	13	ENSSSCG00000030300
2.56655e-270	0.432891	0.391	0.069	4.14241e-266	13	RALB
3.08825e-269	0.381271	0.308	0.044	4.98444e-265	13	EHD4
5.69279e-269	0.466709	0.41	0.076	9.18816e-265	13	PLXNC1
1.45905e-268	0.308889	0.21	0.021	2.35491e-264	13	ENSSSCG00000013144
6.31754e-267	0.332504	0.233	0.026	1.01965e-262	13	PIR
3.04183e-266	0.774481	0.996	0.666	4.90951e-262	13	GMFG
7.70183e-266	0.730963	0.857	0.309	1.24307e-261	13	RNH1
1.45375e-265	0.575205	0.755	0.217	2.34636e-261	13	NCF4
4.5525e-265	0.437375	0.37	0.063	7.34774e-261	13	FGD4
1.23592e-264	0.580728	0.498	0.11	1.99477e-260	13	OAS2
1.11009e-260	0.644406	0.654	0.187	1.79169e-256	13	ATG3
5.04702e-260	0.550266	0.547	0.131	8.14589e-256	13	GM2A
8.03454e-260	0.406345	0.333	0.053	1.29678e-255	13	CCRL2
1.38232e-259	0.752246	0.908	0.361	2.23106e-255	13	CAPG
3.09557e-259	0.30834	0.218	0.023	4.99626e-255	13	FAH
1.08096e-257	0.813178	0.654	0.199	1.74467e-253	13	FBXO39
9.54746e-256	0.674678	0.803	0.268	1.54096e-251	13	NPC2
1.63172e-254	0.343158	0.234	0.028	2.63359e-250	13	ENSSSCG00000003272
2.28302e-254	0.579657	0.555	0.139	3.6848e-250	13	ARF3
4.77832e-254	0.536954	0.557	0.137	7.71221e-250	13	ICAM2
1.27602e-253	0.35759	0.319	0.049	2.0595e-249	13	MSRA
5.27272e-253	-0.96958	0.956	0.959	8.51018e-249	13	ARHGDIB
5.11611e-252	0.486545	0.462	0.1	8.2574e-248	13	WARS
3.30532e-251	0.475881	0.387	0.073	5.33479e-247	13	CNIH4
1.00155e-248	0.368054	0.257	0.033	1.6165e-244	13	ENSSSCG00000012523
7.44869e-246	0.407889	0.371	0.067	1.20222e-241	13	ENSSSCG00000022773
1.40848e-244	0.510586	0.41	0.082	2.27329e-240	13	MBOAT7
5.18056e-244	0.495917	0.517	0.121	8.36143e-240	13	OTULINL
2.67774e-243	0.852637	0.986	0.514	4.32187e-239	13	S100A4
7.28972e-243	0.288853	0.218	0.025	1.17656e-238	13	TLR8
2.54713e-242	0.590404	0.332	0.056	4.11106e-238	13	ENSSSCG00000038406
1.23823e-241	0.29671	0.228	0.027	1.99851e-237	13	ACP2
1.96208e-241	0.363384	0.316	0.051	3.16679e-237	13	OSBPL11
8.15762e-241	0.320128	0.235	0.029	1.31664e-236	13	CD68
8.35102e-241	0.727609	0.899	0.392	1.34785e-236	13	AP2S1
1.38729e-240	0.736271	1	0.879	2.23908e-236	13	ENSSSCG00000014565
1.11429e-239	0.422287	0.361	0.066	1.79846e-235	13	PRKCD
9.62392e-239	0.399242	0.366	0.067	1.5533e-234	13	DHRS9
1.06436e-238	0.574637	0.646	0.183	1.71788e-234	13	ZEB2
1.37054e-238	0.451769	0.53	0.128	2.21205e-234	13	ENSSSCG00000008222
1.69322e-238	0.521698	0.489	0.116	2.73286e-234	13	GSR
2.89909e-236	0.772993	0.969	0.54	4.67913e-232	13	ENSSSCG00000013366
6.6496e-236	0.446399	0.52	0.122	1.07325e-231	13	ENSSSCG00000014013
1.23286e-235	0.414066	0.372	0.07	1.98983e-231	13	RAB31
1.44818e-235	0.523092	0.545	0.139	2.33737e-231	13	TNFAIP8L2
4.40026e-235	0.710947	0.925	0.405	7.10202e-231	13	MGST1
4.72468e-234	0.465119	0.604	0.159	7.62563e-230	13	FGR
3.32716e-233	0.46346	0.544	0.136	5.37004e-229	13	SNAP23
1.02296e-232	0.296251	0.216	0.025	1.65106e-228	13	CCR1
5.6328e-232	0.346318	0.242	0.032	9.09134e-228	13	TPST1
1.68239e-231	0.3339	0.256	0.035	2.71538e-227	13	ZNF385A
2.77615e-231	0.298911	0.214	0.025	4.48071e-227	13	KIAA0513
7.48337e-231	0.516872	0.581	0.155	1.20782e-226	13	RGS10
1.17129e-230	0.346335	0.292	0.046	1.89047e-226	13	SLC15A3
2.7829e-227	0.660347	0.997	0.768	4.4916e-223	13	ENSSSCG00000032556
3.50753e-227	0.524908	0.66	0.193	5.66115e-223	13	TMEM50B
4.61984e-226	0.399505	0.355	0.066	7.45642e-222	13	BACH1
9.70515e-225	0.351268	0.217	0.027	1.56641e-220	13	ENSSSCG00000005437
2.87728e-220	0.737846	0.996	0.606	4.64392e-216	13	ENSSSCG00000036618
1.05113e-219	0.623887	0.835	0.301	1.69652e-215	13	CTSH
8.87175e-218	0.427433	0.347	0.067	1.4319e-213	13	GGH
9.72325e-218	0.406283	0.391	0.082	1.56933e-213	13	MAPKAPK3
1.17348e-217	0.482192	0.535	0.138	1.89399e-213	13	VSIR
4.75751e-216	0.607587	0.623	0.193	7.67862e-212	13	CHMP5
4.79484e-215	0.724514	0.938	0.521	7.73888e-211	13	ENSSSCG00000003914
5.84017e-215	0.71204	0.984	0.667	9.42603e-211	13	S100A10
1.56019e-214	-0.472226	1	1	2.51814e-210	13	ENSSSCG00000034448
2.35076e-214	0.672071	0.771	0.291	3.79413e-210	13	RAC1
2.55753e-214	0.62402	0.857	0.331	4.12785e-210	13	FCGRT
2.96192e-214	0.44973	0.417	0.093	4.78054e-210	13	MFSD14B
6.26159e-214	0.586024	0.732	0.251	1.01062e-209	13	LAMTOR1
8.50736e-214	-0.468264	1	1	1.37309e-209	13	ENSSSCG00000035080
8.5641e-213	1.03145	0.949	0.536	1.38225e-208	13	IFI6
1.59634e-212	0.372261	0.372	0.074	2.57649e-208	13	IFNGR2
1.89173e-212	0.409356	0.366	0.074	3.05326e-208	13	HACD2
6.2286e-212	0.370137	0.311	0.055	1.0053e-207	13	BLVRB
1.11515e-211	0.6779	0.958	0.468	1.79985e-207	13	TMEM59
9.29562e-211	0.464982	0.475	0.117	1.50031e-206	13	GINM1
1.07538e-210	0.348859	0.317	0.057	1.73567e-206	13	GNS
4.70326e-210	0.344659	0.306	0.053	7.59106e-206	13	FUCA1
3.85153e-208	0.392895	0.382	0.08	6.21636e-204	13	TRAF7
4.51762e-208	0.80791	0.86	0.422	7.29143e-204	13	STAT1
1.87833e-207	0.49476	0.542	0.15	3.03162e-203	13	G6PD
2.56278e-207	0.522795	0.668	0.212	4.13633e-203	13	H2AFY
2.65822e-207	0.483437	0.468	0.114	4.29037e-203	13	ENSSSCG00000006350
1.47636e-205	0.486244	0.638	0.193	2.38284e-201	13	THEMIS2
1.95925e-205	0.31929	0.258	0.04	3.16223e-201	13	CTNNA1
3.70886e-205	0.51613	0.627	0.188	5.9861e-201	13	RNF149
3.96271e-205	0.736011	0.802	0.323	6.39582e-201	13	CYBA
5.94231e-205	0.335751	0.327	0.061	9.59089e-201	13	DOK3
7.85041e-205	0.368259	0.274	0.045	1.26706e-200	13	AHR
7.97216e-205	0.479871	0.67	0.205	1.28671e-200	13	PLD4
4.50526e-203	0.691782	0.961	0.512	7.27149e-199	13	PKM
8.35085e-203	0.31806	0.263	0.042	1.34783e-198	13	AMBN
1.06746e-202	0.546027	0.66	0.216	1.72288e-198	13	RAB10
1.74535e-202	0.43435	0.491	0.126	2.817e-198	13	TMEM243
1.02625e-200	0.832706	0.669	0.25	1.65636e-196	13	BST2
6.36528e-200	0.308488	0.263	0.043	1.02736e-195	13	ATP6V1A
1.09503e-199	0.539278	0.655	0.212	1.76738e-195	13	ENSSSCG00000013232
8.75278e-199	0.482675	0.642	0.199	1.4127e-194	13	SKAP2
1.29724e-198	-1.37798	0.397	0.733	2.09374e-194	13	LIMD2
1.09474e-197	0.293407	0.22	0.031	1.76691e-193	13	SGK3
4.91968e-196	0.430459	0.476	0.122	7.94036e-192	13	NFE2L2
8.59692e-195	0.590502	0.777	0.306	1.38754e-190	13	TPM4
2.82163e-194	0.511078	0.582	0.175	4.55411e-190	13	CREM
7.24929e-194	0.598206	0.791	0.303	1.17004e-189	13	TWF2
1.22206e-193	0.516857	0.712	0.241	1.97241e-189	13	EVI2B
9.83182e-193	0.480335	0.552	0.162	1.58686e-188	13	RAB1A
2.12781e-192	0.330626	0.299	0.055	3.43428e-188	13	TAX1BP3
9.53296e-192	-0.568629	1	0.998	1.53862e-187	13	RPL34
9.07018e-191	0.257381	0.201	0.027	1.46393e-186	13	C9orf72
1.41013e-190	0.553083	0.718	0.255	2.27594e-186	13	AKR1A1
4.85973e-190	0.589198	0.91	0.4	7.8436e-186	13	LAT2
8.9786e-190	0.407339	0.466	0.121	1.44915e-185	13	MYD88
2.7154e-189	0.306179	0.271	0.047	4.38266e-185	13	CARD6
1.24801e-188	0.387413	0.374	0.084	2.01429e-184	13	BRI3
1.30357e-188	0.372894	0.392	0.09	2.10396e-184	13	CLTB
5.30211e-187	0.663801	0.956	0.529	8.55761e-183	13	ESD
8.725e-187	-0.477879	0.999	0.998	1.40822e-182	13	RPS16
8.79291e-187	0.64061	0.935	0.507	1.41918e-182	13	CTSC
1.34757e-186	0.742079	0.819	0.377	2.17498e-182	13	SLC25A5
1.65934e-186	0.402571	0.326	0.066	2.67817e-182	13	DDX58
3.70653e-186	0.493954	0.648	0.214	5.98233e-182	13	ENSSSCG00000025007
2.29543e-184	0.478904	0.63	0.2	3.70483e-180	13	LYN
2.28072e-181	0.349534	0.323	0.066	3.68109e-177	13	ENSSSCG00000023264
8.2403e-181	0.622071	0.949	0.568	1.32998e-176	13	TMBIM6
1.41319e-180	-0.575281	0.998	0.996	2.2809e-176	13	ENSSSCG00000038507
1.5511e-180	0.413474	0.471	0.126	2.50347e-176	13	PMAIP1
2.23726e-180	0.354755	0.541	0.152	3.61094e-176	13	HCK
4.86449e-180	0.478889	0.671	0.228	7.85129e-176	13	LAMP2
9.35702e-180	-0.526434	1	0.999	1.51022e-175	13	ENSSSCG00000003042
1.21842e-179	0.392254	0.408	0.098	1.96653e-175	13	NCF1
6.78499e-179	0.641269	0.641	0.229	1.0951e-174	13	LGALS3BP
1.22815e-178	0.345974	0.396	0.095	1.98223e-174	13	STX12
1.4024e-178	0.628073	0.938	0.512	2.26348e-174	13	GRB2
2.25079e-177	0.536909	0.66	0.234	3.63277e-173	13	ENSSSCG00000040801
6.79298e-177	0.513197	0.714	0.26	1.09639e-172	13	ATOX1
1.19296e-176	0.335524	0.275	0.051	1.92544e-172	13	GBE1
5.39073e-175	0.386629	0.42	0.107	8.70065e-171	13	DEGS1
3.27877e-174	0.297261	0.259	0.046	5.29194e-170	13	DHRS7
3.4607e-173	0.477715	0.625	0.211	5.58557e-169	13	GPI
1.32689e-172	0.379036	0.386	0.095	2.14159e-168	13	ENSSSCG00000012746
3.67365e-172	0.463074	0.632	0.213	5.92928e-168	13	C18orf32
4.59737e-172	0.363625	0.385	0.092	7.42015e-168	13	NAGA
7.32205e-172	0.504623	0.723	0.264	1.18178e-167	13	ARRB2
9.27783e-171	0.300064	0.246	0.043	1.49744e-166	13	ENSSSCG00000038141
9.20757e-170	0.265866	0.255	0.045	1.4861e-165	13	TIAM1
2.82743e-169	0.429538	0.834	0.314	4.56348e-165	13	ENSSSCG00000014361
3.26319e-168	0.313903	0.286	0.057	5.26679e-164	13	GLA
4.7826e-168	0.508921	0.992	0.778	7.71912e-164	13	GABARAP
1.08953e-166	0.404441	0.412	0.107	1.7585e-162	13	TFDP2
1.68048e-166	0.430306	0.565	0.178	2.7123e-162	13	LITAF
6.07749e-166	0.318432	0.274	0.052	9.80906e-162	13	ENSSSCG00000040566
6.25838e-166	0.370859	0.347	0.08	1.0101e-161	13	GPCPD1
1.72112e-165	-1.92	0.041	0.52	2.77788e-161	13	LTB
3.04733e-165	0.529215	0.809	0.333	4.91839e-161	13	VMP1
6.93121e-164	0.939502	0.769	0.387	1.1187e-159	13	ISG15
3.01747e-163	-1.39045	0.043	0.514	4.8702e-159	13	SEPT1
3.48962e-163	0.350098	0.329	0.073	5.63225e-159	13	ENSSSCG00000037566
7.20643e-163	0.310251	0.28	0.056	1.16312e-158	13	CXorf21
1.45293e-161	0.318853	0.334	0.076	2.34503e-157	13	SH3BP2
1.14958e-160	0.598957	0.809	0.35	1.85543e-156	13	ZFP36
1.41126e-160	0.382658	0.559	0.175	2.27778e-156	13	ATP6AP1
1.90528e-160	0.402738	0.509	0.154	3.07512e-156	13	RRBP1
2.61152e-160	0.272105	0.277	0.055	4.21499e-156	13	PLIN3
2.95354e-160	0.643934	0.953	0.769	4.76702e-156	13	GPX1
4.23223e-160	0.278365	0.267	0.052	6.83082e-156	13	NXPE3
9.70817e-160	0.26571	0.261	0.05	1.5669e-155	13	SIPA1L1
1.00722e-159	0.796205	0.505	0.172	1.62565e-155	13	ISG20
1.36403e-159	0.289196	0.243	0.044	2.20154e-155	13	SLC44A1
4.48686e-159	0.554235	0.874	0.412	7.2418e-155	13	CAPZA2
1.21647e-158	0.344903	0.418	0.11	1.96338e-154	13	MEF2A
1.57887e-158	0.421146	0.488	0.147	2.5483e-154	13	ENSSSCG00000007692
2.57923e-157	0.423897	0.494	0.149	4.16288e-153	13	DCXR
3.18967e-157	0.275816	0.248	0.046	5.14813e-153	13	P4HA1
8.05748e-157	-1.4683	0.048	0.506	1.30048e-152	13	ETS1
1.88534e-156	-2.15124	0.057	0.51	3.04293e-152	13	ENSSSCG00000033721
2.7962e-156	-0.403288	1	0.998	4.51307e-152	13	ENSSSCG00000036296
5.12692e-156	0.390485	0.573	0.187	8.27485e-152	13	DNASE1L1
1.84957e-155	0.287171	0.284	0.059	2.9852e-151	13	CSF2RB
4.74719e-154	-0.428407	1	0.999	7.66197e-150	13	ENSSSCG00000034617
9.58082e-153	0.465219	0.439	0.128	1.54634e-148	13	ENSSSCG00000032591
1.96667e-152	0.323719	0.314	0.071	3.17421e-148	13	DBNDD2
3.97686e-152	0.392092	0.785	0.306	6.41866e-148	13	SELL
7.10415e-151	0.341007	0.4	0.108	1.14661e-146	13	ATP6V1C1
2.37952e-150	0.254232	0.21	0.035	3.84054e-146	13	TMEM106A
2.8986e-148	0.516561	0.81	0.353	4.67834e-144	13	ENSSSCG00000001038
1.52662e-147	-0.429567	1	1	2.46397e-143	13	RPS27
3.69666e-146	0.326437	0.395	0.106	5.96641e-142	13	SLC25A38
6.97405e-146	-0.431722	0.998	0.997	1.12561e-141	13	HSD11B1L
7.26283e-146	0.311438	0.337	0.082	1.17222e-141	13	TCIRG1
1.12551e-144	0.382841	0.999	0.93	1.81657e-140	13	OAZ1
1.91918e-144	-2.07251	0.042	0.479	3.09756e-140	13	ENSSSCG00000037885
1.23069e-143	0.302907	0.295	0.067	1.98634e-139	13	TREX1
2.71395e-142	0.352974	0.427	0.125	4.38031e-138	13	ENSSSCG00000008137
1.69417e-141	-1.11026	0.594	0.733	2.73439e-137	13	PTPRCAP
3.57926e-141	-1.71802	0.052	0.478	5.77693e-137	13	CD3G
4.39805e-141	0.421284	0.805	0.338	7.09845e-137	13	NDFIP1
7.90638e-141	0.323561	0.345	0.088	1.27609e-136	13	STARD3
1.38654e-140	0.356547	0.429	0.127	2.23788e-136	13	ENSSSCG00000008317
4.48606e-140	0.390491	0.372	0.102	7.2405e-136	13	MX1
1.10346e-139	0.410535	0.588	0.208	1.78099e-135	13	SQSTM1
1.30135e-138	0.460618	0.804	0.352	2.10038e-134	13	SDCBP
2.95534e-138	0.350891	0.466	0.144	4.76992e-134	13	TM9SF2
4.41292e-138	0.370519	0.483	0.153	7.12246e-134	13	CNPY3
2.9608e-137	0.27012	0.223	0.042	4.77874e-133	13	STOM
3.17175e-137	-0.355425	1	0.999	5.1192e-133	13	ENSSSCG00000003930
9.87997e-137	0.300782	0.359	0.095	1.59463e-132	13	GLMP
8.78695e-136	0.273609	0.313	0.076	1.41821e-131	13	HNRNPLL
3.67862e-135	-2.10531	0.049	0.465	5.9373e-131	13	CTSW
8.86584e-135	0.376803	0.435	0.134	1.43095e-130	13	SELENOS
1.9112e-134	0.389699	0.69	0.267	3.08467e-130	13	SNX2
2.22952e-134	0.270634	0.309	0.075	3.59845e-130	13	JAK2
3.36998e-134	0.396263	1	0.94	5.43914e-130	13	H3F3B
2.30062e-133	0.371484	0.574	0.205	3.7132e-129	13	C20orf27
3.48798e-133	0.457034	0.792	0.344	5.6296e-129	13	GLIPR2
3.51305e-133	0.392839	0.676	0.258	5.67007e-129	13	ADGRE5
7.76266e-131	0.270439	0.274	0.063	1.25289e-126	13	ATP2B4
1.42229e-130	0.306984	0.386	0.11	2.29558e-126	13	AP2A2
4.69474e-130	0.339121	0.502	0.165	7.57732e-126	13	ENSSSCG00000013720
5.60373e-130	0.289516	0.272	0.063	9.04442e-126	13	ATF6
8.97657e-130	0.452647	0.69	0.287	1.44882e-125	13	SRP19
1.95955e-129	0.534563	0.883	0.483	3.16272e-125	13	DNAJA1
2.01108e-129	0.327259	0.505	0.169	3.24588e-125	13	ACTR10
3.38031e-129	0.499173	0.94	0.567	5.45582e-125	13	ENSSSCG00000016990
4.45532e-129	0.529892	0.522	0.183	7.19089e-125	13	NFKBIA
1.54863e-128	0.25989	0.303	0.075	2.4995e-124	13	PSEN1
5.98248e-127	0.452274	0.74	0.317	9.65572e-123	13	ENSSSCG00000031897
4.3079e-126	0.337067	0.433	0.137	6.95295e-122	13	LAMTOR3
6.1499e-126	0.436447	0.463	0.155	9.92595e-122	13	ENSSSCG00000033089
8.31217e-126	0.428139	0.705	0.299	1.34158e-121	13	SDHB
3.77608e-125	0.331845	0.419	0.13	6.0946e-121	13	PEA15
1.53661e-124	0.260414	0.296	0.073	2.48009e-120	13	DRAM2
2.16137e-124	0.250148	0.328	0.086	3.48845e-120	13	WDFY2
3.15272e-124	0.270054	0.451	0.142	5.08849e-120	13	LMO4
3.74473e-124	0.401341	0.769	0.335	6.044e-120	13	SELENOT
8.84003e-124	0.471534	0.855	0.436	1.42678e-119	13	CD47
2.1792e-123	0.42708	0.997	0.758	3.51722e-119	13	LAPTM5
5.08415e-123	0.400764	0.688	0.281	8.20581e-119	13	MAT2B
8.36962e-122	0.289797	0.486	0.161	1.35086e-117	13	BNIP3
1.37573e-121	0.530994	0.973	0.624	2.22043e-117	13	UCP2
1.80462e-121	0.522002	0.827	0.444	2.91265e-117	13	PSMA6
3.00128e-121	-0.663039	0.951	0.899	4.84407e-117	13	CORO1A
1.47736e-119	0.288782	0.273	0.068	2.38446e-115	13	CASP3
2.34975e-119	0.27726	0.32	0.087	3.7925e-115	13	PICALM
1.39448e-118	0.335965	0.288	0.074	2.2507e-114	13	CALHM6
2.22739e-118	0.516899	0.969	0.65	3.59501e-114	13	ENSSSCG00000032003
3.20827e-118	0.463208	0.899	0.475	5.17815e-114	13	RHOG
1.2504e-117	-1.35806	0.076	0.448	2.01814e-113	13	TMEM123
1.5363e-117	-0.333018	1	0.999	2.47958e-113	13	ENSSSCG00000035768
1.69576e-117	0.325852	0.467	0.158	2.73696e-113	13	ETHE1
5.40943e-117	0.275856	0.435	0.141	8.73082e-113	13	RAB8B
8.78024e-117	0.42066	0.732	0.327	1.41713e-112	13	LAMTOR2
5.38653e-116	0.315173	0.53	0.193	8.69386e-112	13	AAMP
5.50361e-116	0.327069	0.513	0.183	8.88283e-112	13	ENSSSCG00000012654
5.70502e-116	0.324567	0.57	0.212	9.20791e-112	13	RASSF4
6.73532e-116	0.331323	0.566	0.213	1.08708e-111	13	ENSSSCG00000016451
9.39104e-116	0.386912	0.633	0.256	1.51571e-111	13	KIF5B
4.48934e-115	-0.39429	0.998	0.988	7.24579e-111	13	ENSSSCG00000008170
5.89914e-115	0.429303	0.456	0.157	9.52122e-111	13	RSAD2
8.30093e-115	0.265814	0.325	0.091	1.33977e-110	13	TMEM205
1.13784e-114	0.285788	0.291	0.077	1.83647e-110	13	ENSSSCG00000022925
3.09925e-114	0.257508	0.256	0.061	5.00219e-110	13	MARCKS
8.21959e-114	0.589119	0.71	0.354	1.32664e-109	13	EPSTI1
3.97827e-113	0.358087	0.649	0.268	6.42093e-109	13	MPC2
7.01338e-113	0.259755	0.259	0.064	1.13196e-108	13	B9D2
5.49048e-112	0.280812	0.431	0.14	8.86164e-108	13	ZNF655
5.86522e-112	0.292025	0.441	0.147	9.46647e-108	13	SLC5A10
7.28478e-112	0.352463	0.563	0.213	1.17576e-107	13	PDCD4
1.1416e-111	0.271734	0.274	0.07	1.84254e-107	13	MSMB
1.9013e-111	-0.380344	1	0.998	3.0687e-107	13	RPS3A
2.30753e-111	-1.51458	0.046	0.41	3.72435e-107	13	CD3E
6.42114e-111	0.348044	0.604	0.241	1.03637e-106	13	KDELR1
8.92753e-111	0.253366	0.341	0.098	1.4409e-106	13	TET2
1.58422e-110	0.455619	0.788	0.384	2.55693e-106	13	DYNLL1
5.38851e-110	0.316529	0.414	0.138	8.69706e-106	13	TMEM60
6.66477e-110	0.407031	0.731	0.324	1.07569e-105	13	ZFP36L1
7.0438e-110	-1.17835	0.106	0.456	1.13687e-105	13	ENSSSCG00000033733
1.13149e-109	0.28844	0.461	0.159	1.82623e-105	13	ATP6V1D
4.36168e-109	0.274132	0.398	0.129	7.03975e-105	13	ENSSSCG00000030578
9.27844e-109	0.315612	0.504	0.184	1.49754e-104	13	C21orf91
1.32091e-108	0.321903	0.663	0.272	2.13195e-104	13	GLUD1
5.66635e-108	-1.06967	0.444	0.647	9.14549e-104	13	KLF2
9.73038e-108	0.283472	0.551	0.207	1.57048e-103	13	COMMD3
1.84658e-107	0.253442	0.313	0.088	2.98039e-103	13	PLEKHO1
3.11878e-107	0.308417	0.468	0.165	5.03372e-103	13	RBPJ
7.30311e-107	-2.20859	0.397	0.626	1.17872e-102	13	ENSSSCG00000037775
2.92578e-106	0.466042	0.723	0.349	4.72221e-102	13	UBE2L6
3.36444e-106	0.305673	0.523	0.194	5.43021e-102	13	CD1D
5.59835e-106	0.354161	0.572	0.228	9.03573e-102	13	ENSSSCG00000007609
1.11027e-105	0.274909	0.249	0.062	1.79198e-101	13	LRRK2
2.47522e-105	0.268167	0.435	0.145	3.995e-101	13	MTSS1
1.92873e-104	0.318928	0.52	0.197	3.11297e-100	13	ENSSSCG00000006324
1.43592e-103	0.413359	0.748	0.354	2.31758e-99	13	SNX10
2.95671e-103	0.362121	0.996	0.837	4.77213e-99	13	ARPC1B
3.00857e-103	0.371785	0.608	0.257	4.85583e-99	13	HSBP1
5.66764e-102	0.293746	0.534	0.205	9.14757e-98	13	MYO1F
1.01425e-101	0.389911	0.747	0.349	1.63699e-97	13	PLP2
3.88795e-101	-0.337887	0.999	0.997	6.27515e-97	13	RPL9
7.32917e-101	0.454815	0.944	0.617	1.18293e-96	13	SLC25A3
9.48353e-101	-1.14379	0.039	0.381	1.53064e-96	13	SIT1
2.12046e-100	0.302621	0.539	0.21	3.42242e-96	13	ENSSSCG00000033757
4.27943e-100	0.37301	0.833	0.407	6.907e-96	13	CD99
5.76461e-100	0.31663	0.527	0.207	9.30409e-96	13	MRPL24
1.00597e-99	0.417706	0.858	0.447	1.62364e-95	13	GNAI2
1.54596e-99	0.307179	0.614	0.252	2.49518e-95	13	PCMT1
1.58801e-99	0.314412	0.451	0.164	2.56304e-95	13	HERC6
3.50709e-99	0.43458	0.769	0.385	5.66044e-95	13	POMP
4.19853e-99	0.338204	0.68	0.3	6.77642e-95	13	RAB7A
5.87108e-99	0.283166	0.428	0.149	9.47592e-95	13	CAST
8.8585e-99	0.31415	0.612	0.253	1.42976e-94	13	MVP
1.59251e-98	0.279261	0.508	0.192	2.57031e-94	13	TRAPPC4
2.20386e-98	0.314759	0.509	0.198	3.55702e-94	13	USP15
3.62466e-98	0.264302	0.371	0.123	5.8502e-94	13	RUVBL1
3.95498e-98	0.310538	0.342	0.109	6.38334e-94	13	USP18
4.69039e-98	0.325989	0.56	0.228	7.57028e-94	13	ERP29
1.44771e-96	0.290049	0.367	0.121	2.3366e-92	13	OAZ2
1.65356e-96	0.279996	0.488	0.186	2.66884e-92	13	DYNLT1
2.18555e-96	-1.37975	0.035	0.368	3.52748e-92	13	CD247
2.95252e-96	0.384356	0.889	0.471	4.76537e-92	13	RABAC1
4.24818e-96	0.328321	0.453	0.167	6.85655e-92	13	ENSSSCG00000017146
1.13593e-95	0.389988	0.732	0.353	1.83339e-91	13	SNX6
3.22331e-95	0.264896	0.429	0.154	5.20243e-91	13	NSMCE1
8.12202e-95	0.375132	0.617	0.276	1.31089e-90	13	NMI
2.84887e-94	-1.2451	0.04	0.368	4.59808e-90	13	LCK
3.87956e-94	0.252784	0.426	0.153	6.2616e-90	13	MESD
4.97954e-94	0.272431	0.562	0.228	8.03698e-90	13	MTCH1
2.34777e-93	0.302004	0.444	0.165	3.78929e-89	13	CMPK2
2.53233e-93	0.354336	0.682	0.318	4.08718e-89	13	MAP1LC3B
4.21324e-93	-1.10243	0.028	0.353	6.80016e-89	13	GPR174
4.59519e-93	0.263448	0.483	0.184	7.41664e-89	13	ENSSSCG00000032942
1.13745e-92	0.356779	0.735	0.351	1.83584e-88	13	REEP5
2.80114e-92	0.254168	0.401	0.142	4.52103e-88	13	KDELR2
6.20674e-91	0.294543	0.446	0.166	1.00177e-86	13	CMTM3
8.07265e-91	0.399645	0.98	0.793	1.30293e-86	13	COX7C
3.62086e-90	0.263214	0.489	0.191	5.84407e-86	13	RAB8A
4.62913e-90	-0.303932	1	1	7.47142e-86	13	RPL37
4.75834e-90	0.258235	0.428	0.156	7.67996e-86	13	CCDC115
4.78584e-89	0.296988	0.513	0.208	7.72434e-85	13	RTN4
8.19462e-89	-0.373696	0.995	0.98	1.32261e-84	13	RPL3
1.51696e-88	-0.296456	1	0.998	2.44837e-84	13	RPL35
2.28952e-88	-0.267551	1	0.999	3.69528e-84	13	ENSSSCG00000035811
1.30357e-87	0.251192	0.597	0.249	2.10396e-83	13	IL10RA
1.98293e-87	0.310278	0.21	0.053	3.20045e-83	13	ENSSSCG00000029160
4.0533e-87	0.26656	0.49	0.195	6.54202e-83	13	CISD2
7.25293e-87	0.382671	0.926	0.585	1.17062e-82	13	EIF4A1
2.87476e-86	0.365433	0.992	0.682	4.63987e-82	13	CD52
9.65144e-85	0.263891	0.499	0.202	1.55774e-80	13	PET100
9.83147e-85	0.31106	0.718	0.343	1.5868e-80	13	IFI44L
1.89058e-84	0.258599	0.503	0.203	3.0514e-80	13	NECAP2
3.47057e-84	0.329503	0.63	0.29	5.6015e-80	13	ENSSSCG00000011676
1.74849e-83	0.273458	0.68	0.311	2.82207e-79	13	SSR3
4.82435e-83	-1.07196	0.332	0.533	7.7865e-79	13	ARPC5L
2.37692e-82	-0.277875	1	0.999	3.83635e-78	13	RPS26
6.16531e-81	-1.80658	0.039	0.332	9.95081e-77	13	CD79B
6.93473e-80	-0.993429	0.154	0.428	1.11927e-75	13	PSIP1
1.2394e-78	0.322363	0.806	0.42	2.00039e-74	13	ENSSSCG00000010320
1.4032e-78	0.286523	0.686	0.325	2.26476e-74	13	NDUFS7
1.5513e-78	-2.70042	0.077	0.363	2.50381e-74	13	ENSSSCG00000036224
2.91207e-78	-0.31103	0.999	0.995	4.70008e-74	13	RPS18
2.96342e-78	0.298402	0.784	0.397	4.78297e-74	13	ENSSSCG00000013721
1.52723e-77	-0.273443	1	1	2.46494e-73	13	ENSSSCG00000040273
8.04133e-77	-1.05232	0.358	0.546	1.29787e-72	13	ENSSSCG00000001398
3.87333e-76	0.258633	0.539	0.238	6.25156e-72	13	NDUFS3
4.43366e-76	-0.965133	0.039	0.32	7.15593e-72	13	ABLIM1
7.16918e-76	-0.274847	1	0.999	1.15711e-71	13	RPS11
2.19623e-75	-1.20859	0.037	0.316	3.54472e-71	13	TRAT1
7.16476e-75	0.294795	0.654	0.314	1.15639e-70	13	IQGAP1
1.53638e-74	-1.57291	0.013	0.288	2.47971e-70	13	MS4A1
3.07525e-74	-0.301809	1	0.996	4.96345e-70	13	RPL6
1.22139e-73	0.251789	0.701	0.339	1.97132e-69	13	SEC62
7.01029e-73	0.308109	0.984	0.8	1.13146e-68	13	ARPC3
8.17717e-73	0.431983	0.961	0.739	1.3198e-68	13	HSPA8
1.06246e-72	0.320588	0.88	0.521	1.71481e-68	13	OSTF1
2.74562e-72	0.288082	0.635	0.302	4.43143e-68	13	ENSSSCG00000027085
8.96444e-72	0.298097	0.952	0.604	1.44686e-67	13	ITGB2
1.01409e-71	0.399171	0.94	0.642	1.63675e-67	13	ENSSSCG00000006395
1.81691e-71	0.332401	0.848	0.479	2.93249e-67	13	NDUFB10
3.02774e-71	0.291856	0.759	0.393	4.88677e-67	13	CLTA
1.62791e-70	0.311367	0.757	0.405	2.62745e-66	13	BCAP31
2.50565e-70	-0.2671	0.997	0.996	4.04412e-66	13	ENSSSCG00000011272
5.83376e-70	-0.906881	0.024	0.287	9.41569e-66	13	IKZF3
9.53978e-70	-1.06141	0.018	0.28	1.53972e-65	13	CST7
1.36839e-69	0.396102	0.627	0.318	2.20858e-65	13	ENSSSCG00000003253
2.25407e-69	0.305408	0.617	0.303	3.63807e-65	13	TAP1
2.75369e-69	0.263223	0.772	0.397	4.44445e-65	13	MCL1
5.73768e-69	0.263851	0.691	0.345	9.26062e-65	13	FERMT3
1.48061e-68	0.316955	0.708	0.374	2.38971e-64	13	MGST3
2.59203e-68	0.253293	0.54	0.247	4.18354e-64	13	ENSSSCG00000034072
2.73636e-68	-2.08762	0.051	0.31	4.41649e-64	13	GZMB
4.32752e-68	0.261027	0.696	0.346	6.98462e-64	13	TMCO1
1.85446e-67	0.25031	0.392	0.161	2.9931e-63	13	CIAO2A
3.19188e-66	0.347305	0.858	0.53	5.1517e-62	13	ENSSSCG00000039582
4.75884e-66	0.294201	0.727	0.386	7.68077e-62	13	TAX1BP1
8.92044e-66	-0.303441	1	0.994	1.43976e-61	13	RPS6
4.22829e-65	-1.28457	0.241	0.45	6.82445e-61	13	SMC6
4.69421e-65	0.434879	0.658	0.366	7.57645e-61	13	ENSSSCG00000031912
6.02207e-64	0.298917	0.9	0.563	9.71963e-60	13	ENSSSCG00000006418
1.9944e-63	0.302151	0.975	0.706	3.21896e-59	13	ARPC5
3.82343e-63	0.256896	0.835	0.449	6.17101e-59	13	TPI1
1.60729e-62	-0.934539	0.037	0.28	2.59416e-58	13	SKAP1
2.15269e-62	-3.76402	0.102	0.344	3.47444e-58	13	CCL5
1.03413e-61	-0.924032	0.165	0.394	1.66909e-57	13	ARL6IP5
1.64962e-61	-0.316445	1	0.998	2.66248e-57	13	PTMA
2.62934e-61	0.273628	0.91	0.543	4.24376e-57	13	RGS19
3.27713e-61	0.274647	0.818	0.463	5.28928e-57	13	RBX1
6.0204e-61	-0.29091	0.997	0.982	9.71693e-57	13	ENSSSCG00000024974
1.18416e-60	-0.796255	0.032	0.27	1.91123e-56	13	TBC1D10C
2.22316e-60	-0.499266	0.878	0.807	3.58818e-56	13	TMA7
8.08362e-60	0.335477	0.804	0.489	1.3047e-55	13	ENSSSCG00000018063
1.343e-59	-0.43219	0.946	0.912	2.16759e-55	13	RPL5
1.63767e-59	-0.275874	0.999	0.994	2.6432e-55	13	RPL7
3.09677e-59	-0.850889	0.239	0.441	4.99818e-55	13	CNN2
3.55745e-59	0.28019	0.687	0.366	5.74173e-55	13	PRDX2
4.68663e-58	-0.259419	0.999	0.993	7.56422e-54	13	RPL17-C18orf32
6.51343e-58	-0.807381	0.022	0.249	1.05127e-53	13	S1PR1
1.27087e-57	-0.330939	0.992	0.96	2.05119e-53	13	RPL22
9.69861e-57	-0.819756	0.468	0.569	1.56536e-52	13	TRAF3IP3
1.58528e-56	-0.882639	0.022	0.244	2.55864e-52	13	CD3D
1.81669e-56	0.25852	0.717	0.388	2.93214e-52	13	ENSSSCG00000010517
2.73143e-56	0.267831	0.99	0.863	4.40852e-52	13	FTL
3.55725e-56	-1.32355	0.017	0.239	5.74141e-52	13	ENSSSCG00000040849
1.52796e-55	0.315517	0.82	0.5	2.46613e-51	13	PSMB2
1.61726e-55	0.251619	0.987	0.819	2.61025e-51	13	NME2
5.05226e-55	-0.780178	0.029	0.25	8.15434e-51	13	LBH
7.55651e-55	-0.936701	0.014	0.23	1.21962e-50	13	CD8A
2.25261e-54	0.254966	0.973	0.742	3.63571e-50	13	ENSSSCG00000000576
3.35984e-54	-0.860829	0.153	0.369	5.42279e-50	13	GNG2
8.69632e-54	-1.41678	0.16	0.365	1.40359e-49	13	STMN1
8.87497e-54	-0.670622	0.677	0.682	1.43242e-49	13	NAP1L1
1.90276e-53	-0.720117	0.018	0.231	3.07105e-49	13	GYPC
5.45257e-53	-0.442556	0.901	0.819	8.80044e-49	13	SUMO2
1.29788e-52	0.29387	0.8	0.48	2.09478e-48	13	PPIB
1.56487e-52	-0.832379	0.143	0.354	2.52571e-48	13	BIN1
4.18092e-52	0.268133	0.468	0.228	6.748e-48	13	TMEM156
1.16594e-51	0.277207	0.839	0.504	1.88182e-47	13	ENSSSCG00000006061
1.20951e-49	-1.37761	0.039	0.243	1.95215e-45	13	ENSSSCG00000029596
1.20148e-48	0.312713	0.703	0.417	1.93919e-44	13	HSPB1
1.00011e-47	-0.292403	0.815	0.439	1.61419e-43	13	HMGB2
4.01556e-47	0.265013	0.987	0.809	6.48111e-43	13	ND1
7.32225e-47	-0.848128	0.228	0.407	1.18181e-42	13	ENSSSCG00000034868
1.04006e-46	-0.77299	0.162	0.357	1.67866e-42	13	ADD3
2.0838e-46	-0.890801	0.016	0.206	3.36325e-42	13	ENSSSCG00000000663
3.24714e-46	-0.63191	0.687	0.66	5.24088e-42	13	ENSSSCG00000005656
3.49068e-46	-0.710663	0.023	0.212	5.63396e-42	13	PVRIG
4.00305e-46	-0.825378	0.187	0.371	6.46092e-42	13	TLE5
2.66866e-44	-0.861468	0.098	0.287	4.30722e-40	13	BATF
1.72033e-42	-0.681303	0.068	0.254	2.77662e-38	13	SNRPN
3.03859e-41	-0.695521	0.582	0.596	4.90428e-37	13	SEPT7
6.15989e-40	-3.67396	0.117	0.295	9.94206e-36	13	GNLY
7.74515e-40	-0.843783	0.296	0.431	1.25007e-35	13	SOD1
5.70693e-39	-0.734792	0.032	0.201	9.21098e-35	13	RALGPS2
6.0453e-39	-0.651259	0.846	0.748	9.75712e-35	13	ENSSSCG00000009327
1.54794e-38	-1.29192	0.034	0.202	2.49838e-34	13	ENSSSCG00000038719
1.33825e-37	-0.608093	0.049	0.219	2.15994e-33	13	RASGRP1
5.0284e-37	-0.796216	0.139	0.307	8.11584e-33	13	ENSSSCG00000035256
1.07597e-36	-0.676017	0.116	0.284	1.73661e-32	13	ACP5
8.3859e-36	-0.857628	0.26	0.405	1.35348e-31	13	CD2
9.8526e-36	-0.657767	0.649	0.625	1.59021e-31	13	EZR
6.25958e-35	-0.717937	0.155	0.312	1.0103e-30	13	RASGRP2
1.72436e-33	-0.725162	0.101	0.257	2.78312e-29	13	SMC4
1.74619e-32	-0.56973	0.763	0.692	2.81834e-28	13	LCP1
8.24606e-32	-0.710969	0.145	0.292	1.33091e-27	13	SERPINB9
4.62989e-31	-0.368269	0.92	0.816	7.47264e-27	13	MIF
2.55449e-29	-0.46527	0.945	0.854	4.12295e-25	13	BTG1
2.81954e-29	-0.498109	0.858	0.741	4.55074e-25	13	ARF6
2.1413e-27	-0.525849	0.09	0.233	3.45606e-23	13	TUBA4A
3.55945e-27	-0.555969	0.072	0.207	5.74495e-23	13	SPTBN1
4.07813e-27	-0.359968	0.849	0.75	6.58209e-23	13	SERBP1
2.50018e-26	-0.321913	0.951	0.848	4.03529e-22	13	ENSSSCG00000028485
2.65026e-26	-0.501538	0.069	0.202	4.27751e-22	13	MFNG
3.40208e-26	-0.515469	0.097	0.23	5.49096e-22	13	HMGA1
4.05234e-26	-0.257255	0.981	0.907	6.54047e-22	13	ENSSSCG00000006081
1.23392e-25	-0.552227	0.968	0.883	1.99155e-21	13	ACTG1
1.35191e-25	-0.679155	0.301	0.394	2.18198e-21	13	SEPT6
1.91977e-25	-0.671154	0.248	0.358	3.09851e-21	13	ENSSSCG00000001097
4.86502e-24	-0.271534	0.978	0.907	7.85215e-20	13	ENSSSCG00000033500
2.45416e-23	-0.541315	0.416	0.226	3.96102e-19	13	HIST1H2AB
3.62807e-22	-0.56369	0.602	0.572	5.85571e-18	13	PNISR
7.86158e-22	-0.490296	0.556	0.637	1.26886e-17	13	ENSSSCG00000033734
6.70025e-20	-0.460365	0.725	0.636	1.08142e-15	13	HNRNPDL
6.82792e-20	-0.51763	0.754	0.627	1.10203e-15	13	H2AFV
2.65038e-19	-0.55951	0.353	0.414	4.27772e-15	13	UNC119
3.3378e-19	-0.54902	0.361	0.419	5.38722e-15	13	DDT
5.8199e-19	-0.472788	0.72	0.629	9.39331e-15	13	ENSSSCG00000007188
2.0918e-18	-2.36081	0.197	0.313	3.37617e-14	13	HBB
1.93512e-17	-0.321096	0.962	0.86	3.12328e-13	13	PTPRC
3.05597e-16	-2.28576	0.177	0.286	4.93234e-12	13	ENSSSCG00000007978
1.12563e-15	-0.369552	0.942	0.825	1.81677e-11	13	DDX5
2.02243e-15	-0.546079	0.246	0.32	3.2642e-11	13	SASH3
2.92142e-15	-0.452075	0.717	0.616	4.71517e-11	13	SRSF2
9.52648e-15	-0.47693	0.7	0.624	1.53757e-10	13	JAK1
1.308e-14	-0.288673	0.92	0.809	2.11112e-10	13	ENSSSCG00000036350
3.23058e-14	-0.76801	0.287	0.339	5.21416e-10	13	RDX
3.88565e-14	-0.70033	0.24	0.305	6.27144e-10	13	S100A13
5.49523e-14	-0.547651	0.327	0.379	8.86931e-10	13	ATRX
6.86123e-14	-0.462052	0.147	0.229	1.1074e-09	13	ENSSSCG00000035209
1.37815e-13	-0.460328	0.12	0.203	2.22433e-09	13	SLC44A2
2.07956e-13	-0.522789	0.19	0.265	3.35641e-09	13	HMOX2
3.61961e-13	-0.471364	0.187	0.267	5.84205e-09	13	MISP3
4.93065e-13	-0.506551	0.131	0.21	7.95808e-09	13	SMIM14
7.10812e-13	-0.515478	0.541	0.515	1.14725e-08	13	SRSF5
7.67815e-13	-0.510799	0.154	0.231	1.23925e-08	13	CHD3
1.12841e-12	-0.51493	0.148	0.223	1.82126e-08	13	CKS2
1.37807e-12	-0.261807	0.926	0.815	2.2242e-08	13	EIF4A2
[truncated: 14,279 more rows]

## Sheet: DEG no fully annotated
Supplementary File 6. Number of genes withouth gene symbol in the current Sus scrofa 11.1 genome and annotation v11.1.97
Cluster	DEG	Genes without symbol
0	442	91
1	460	92
2	314	55
3	113	17
4	139	23
5	223	36
6	117	18
7	124	23
8	233	47
9	235	38
10	147	46
11	198	37
12	141	36
13	598	92
14	606	121
15	152	26
16	132	27
17	148	27
18	412	86
19	672	98
20	630	91
21	107	18
22	84	13
23	112	17
24	146	21
25	572	95
26	153	26
27	547	91
28	542	104
29	393	72
30	341	56
31	157	27
32	590	103
33	427	84
34	35	6
35	43	7
