# Supplementary material for: Reference transcriptomes of porcine peripheral immune cells created through bulk and single-cell RNA sequencing
Source: bioRxiv preprint, doi:10.1101/2021.04.02.438107, version 1 (2021-04-04)
Supplement: SuppFile07 [file 438107_file15.xlsx]

## Sheet: Paiwise comparison scRNA-seq
Supplementary File 7. Differentially expressed genes between pairwise comparisons of scRNA-seq clusters. Specified genes (Gene Symbol & gene columns) were differentially expressed in cells of a specified cluster (pop1 column) relative to cells of another cluster (pop2). pct.1 column corresponds to the percentage of cells expressing a gene in pop1 cluster, while pct.2 corresponds to the percentage…
Gene	avg_logFC	pct.1	pct.2	p_val_adj	comparison
CCR7	2.15227	0.758	0.009	0	0v1
EVL	2.10682	0.758	0.028	0	0v1
PLAC8	1.28126	0.966	0.655	0	0v1	Gene Symbol	Gene name
RPS15	1.0381	1	0.99	0	0v1	avg_logFC	Average Log Fold Change (natural log)
ENSSSCG00000003042	0.867881	1	0.995	0	0v1	pct.1	% of cells expressed in cluster A
ENSSSCG00000031088	0.7809	1	0.995	0	0v1	pct.2	% of cells expressed in cluster B
RPS27	0.727612	1	0.999	0	0v1	p_val_adj	Adjusted P value
RPS3A	0.715164	1	0.997	0	0v1	gene	Gene name
ENSSSCG00000025928	0.706893	0.997	0.952	0	0v1	comparison	Comparison vs.
ENSSSCG00000034617	0.684074	1	0.998	0	0v1
RPLP0	0.666496	1	0.992	0	0v1
ENSSSCG00000035768	0.648795	1	0.996	0	0v1
RPS18	0.635727	1	0.986	0	0v1
RPL34	0.632288	1	0.997	0	0v1
ENSSSCG00000036296	0.619724	0.999	0.996	0	0v1
RPL9	0.560851	1	0.996	0	0v1
ENSSSCG00000004970	0.538409	1	0.999	0	0v1
RPS20	0.505867	1	1	0	0v1
ENSSSCG00000003930	0.486814	1	0.999	2.33255e-302	0v1
RPL6	0.5869	1	0.99	2.9817e-301	0v1
RPL35	0.543854	1	0.994	8.4199e-300	0v1
TMEM123	1.66981	0.643	0.05	1.19543e-294	0v1
ENSSSCG00000033697	0.83291	0.983	0.888	2.47613e-275	0v1
RPS6	0.631091	0.998	0.983	4.89121e-275	0v1
RPS9	0.558009	0.999	0.99	1.92621e-260	0v1
ENSSSCG00000029830	0.509915	0.999	0.994	8.43197e-258	0v1
HSD11B1L	0.506254	0.999	0.986	9.27732e-249	0v1
TCF7	1.47013	0.546	0.036	8.27627e-239	0v1
RPL11	0.437514	1	0.996	9.7429e-238	0v1
IFITM3	1.30824	0.806	0.4	2.07857e-233	0v1
LEF1	1.54956	0.531	0.032	1.20905e-231	0v1
ENSSSCG00000040273	0.422859	1	0.999	7.09046e-227	0v1
ENSSSCG00000038507	0.510495	0.999	0.996	1.00131e-225	0v1
ENSSSCG00000033019	0.724814	0.966	0.859	2.29377e-225	0v1
ENSSSCG00000035811	0.418237	1	0.997	9.19168e-225	0v1
RPS26	0.455988	1	0.993	2.01089e-224	0v1
RPL37	0.402372	1	0.999	1.54985e-223	0v1
CD5	1.50815	0.48	0.014	2.29309e-218	0v1
RPSA	0.552258	0.995	0.977	8.45557e-217	0v1
ENSSSCG00000013597	0.542813	0.996	0.969	1.86252e-211	0v1
RPL23	0.411967	1	0.997	2.69351e-210	0v1
ENSSSCG00000035080	0.404357	1	0.999	2.93361e-210	0v1
ENSSSCG00000039460	0.605386	0.992	0.934	1.10891e-209	0v1
ENSSSCG00000004489	0.467523	0.999	0.998	1.29582e-205	0v1
SOD1	1.30767	0.617	0.136	1.54503e-205	0v1
RPS5	0.506595	0.996	0.966	1.25556e-203	0v1
RPL7	0.481829	0.999	0.994	3.41698e-197	0v1
RPL22	0.589446	0.979	0.926	6.46718e-196	0v1
RPS14	0.49451	0.999	0.98	3.72377e-192	0v1
CD3E	1.00906	0.742	0.223	1.49937e-189	0v1
SELL	1.27844	0.557	0.092	2.57536e-189	0v1
ENSSSCG00000014569	0.360295	1	0.999	2.62595e-186	0v1
ENSSSCG00000037030	0.508235	0.988	0.972	7.78213e-185	0v1
ENSSSCG00000039544	0.430611	0.998	0.99	8.88778e-185	0v1
S1PR1	1.28115	0.424	0.018	2.70556e-179	0v1
RPL3	0.513487	0.992	0.95	6.87738e-179	0v1
SIT1	1.24512	0.453	0.037	4.74616e-177	0v1
ENSSSCG00000013889	0.384795	0.999	0.994	2.24045e-160	0v1
KXD1	0.395054	0.999	0.985	9.0201e-156	0v1
ENSSSCG00000039046	0.550613	0.972	0.871	6.27717e-155	0v1
RPL17-C18orf32	0.426204	0.997	0.986	5.36951e-153	0v1
RPL7A	0.395284	0.995	0.988	3.11727e-149	0v1
ENSSSCG00000033500	0.666919	0.939	0.733	6.18697e-149	0v1
DAPL1	1.15976	0.344	0.005	6.35151e-149	0v1
DDX5	0.79318	0.887	0.604	1.65725e-148	0v1
ENSSSCG00000024974	0.47608	0.986	0.961	1.94374e-148	0v1
ENSSSCG00000014855	0.340962	0.997	0.997	6.16631e-148	0v1
LTB	0.924127	0.678	0.266	7.47665e-148	0v1
ENSSSCG00000011952	0.49936	0.978	0.939	1.57829e-147	0v1
PDK1	1.12896	0.344	0.013	5.0654e-140	0v1
IL7R	1.16506	0.327	0.004	8.77903e-140	0v1
RPLP2	0.424412	0.995	0.971	1.0732e-139	0v1
ENSSSCG00000011272	0.34221	0.999	0.995	2.98106e-139	0v1
RGS10	1.10462	0.342	0.015	3.84237e-137	0v1
RPS16	0.323555	1	0.998	7.03835e-134	0v1
RPS11	0.354187	0.999	0.996	2.05021e-131	0v1
SSR4	0.816576	0.729	0.397	1.67132e-128	0v1
CD69	1.22369	0.311	0.009	6.29993e-127	0v1
RPS21	0.51181	0.953	0.857	2.21836e-126	0v1
ENSSSCG00000008170	0.398868	0.992	0.972	1.26213e-124	0v1
CTSC	0.894202	0.715	0.358	5.07432e-122	0v1
COX3	0.415534	0.999	0.983	3.28529e-118	0v1
ENSSSCG00000017239	0.350413	0.996	0.986	7.36356e-115	0v1
ENSSSCG00000004945	0.501482	0.937	0.83	2.24768e-113	0v1
ENSSSCG00000004145	0.907735	0.618	0.267	2.33321e-113	0v1
FTL	0.591337	0.915	0.681	4.90696e-111	0v1
ATP6	0.453655	1	0.983	7.3135e-111	0v1
ND4	0.582218	0.98	0.848	8.02176e-111	0v1
RPS23	0.418359	0.989	0.98	9.22464e-110	0v1
ENSSSCG00000009303	0.361654	0.993	0.975	1.48125e-107	0v1
RPS4X	0.357054	0.996	0.977	7.00873e-107	0v1
RPS12	0.322334	0.998	0.992	9.02647e-107	0v1
EEF1B2	0.479146	0.958	0.896	6.83417e-106	0v1
COTL1	0.867688	0.487	0.149	7.52397e-106	0v1
FADS3	0.905316	0.267	0.008	7.29727e-105	0v1
ENSSSCG00000000576	0.662014	0.841	0.635	7.91328e-102	0v1
ENSSSCG00000020830	0.355765	0.986	0.976	1.32824e-95	0v1
ENSSSCG00000013064	0.421622	0.961	0.886	1.95354e-94	0v1
NPM1	0.599246	0.824	0.594	1.03532e-91	0v1
RCAN3	0.89301	0.377	0.084	1.17726e-91	0v1
SPTBN1	0.845225	0.251	0.016	7.93133e-89	0v1
ABLIM1	0.803657	0.51	0.192	1.11248e-87	0v1
ENSSSCG00000037885	0.69266	0.853	0.671	1.42608e-87	0v1
CD4	0.812694	0.212	0.003	3.53066e-84	0v1
BTG1	0.484451	0.921	0.769	5.87501e-83	0v1
CYTB	0.560765	0.949	0.776	9.39584e-83	0v1
ENSSSCG00000036716	0.309877	0.989	0.978	4.13575e-82	0v1
COX17	0.767213	0.519	0.225	4.88475e-82	0v1
ENSSSCG00000039658	0.832092	0.233	0.015	3.47487e-81	0v1
RPL39	0.254088	0.999	0.997	5.18918e-81	0v1
BTG2	0.808153	0.27	0.036	1.39316e-78	0v1
ENSSSCG00000017509	0.288102	0.993	0.979	8.90679e-77	0v1
IL6R	0.813661	0.2	0.006	1.84376e-75	0v1
RPS13	0.351621	0.964	0.959	4.54571e-73	0v1
CHD3	0.765307	0.411	0.14	6.58603e-72	0v1
SRGN	0.630766	0.687	0.426	4.47483e-71	0v1
LAT	0.74256	0.438	0.166	9.11127e-70	0v1
RACK1	0.404984	0.924	0.899	1.50653e-69	0v1
MNDA	0.704981	0.21	0.024	4.52357e-62	0v1
ENSSSCG00000027573	0.314119	0.965	0.958	1.46869e-61	0v1
ENSSSCG00000033733	0.613875	0.541	0.276	2.06654e-58	0v1
CAMK4	0.682444	0.321	0.097	1.18581e-57	0v1
LMO4	0.67147	0.229	0.042	3.58932e-55	0v1
RPS10-NUDT3	0.34563	0.906	0.841	8.93433e-53	0v1
MALT1	0.622605	0.224	0.043	1.11217e-51	0v1
COX7A2L	0.441647	0.776	0.578	8.4666e-51	0v1
ND5	0.642576	0.467	0.229	1.49004e-49	0v1
FBL	0.588429	0.217	0.045	4.0189e-48	0v1
MAP3K1	0.697161	0.299	0.103	3.80721e-46	0v1
CD247	0.544457	0.586	0.359	4.08196e-46	0v1
ARHGAP15	0.589522	0.429	0.203	1.02245e-45	0v1
ABI1	0.634082	0.233	0.059	4.90911e-45	0v1
ENSSSCG00000022912	0.587964	0.396	0.18	2.13908e-44	0v1
HSPE1	0.522078	0.655	0.48	4.87762e-44	0v1
RPL5	0.300191	0.935	0.887	2.15554e-43	0v1
SKAP1	0.54898	0.493	0.267	7.56757e-43	0v1
NDFIP2	0.615386	0.233	0.063	8.73581e-43	0v1
TBC1D20	0.571456	0.234	0.063	9.99895e-43	0v1
FKBP11	0.532801	0.473	0.249	1.70669e-42	0v1
STMN1	0.612477	0.554	0.339	1.62215e-41	0v1
ENSSSCG00000026140	0.57769	0.441	0.218	3.56397e-41	0v1
SMC4	0.646369	0.394	0.188	1.70747e-40	0v1
ENSSSCG00000006418	0.455272	0.592	0.369	1.58266e-39	0v1
RPL10A	0.573237	0.548	0.33	1.6348e-39	0v1
NCK1	0.604525	0.22	0.061	1.09995e-38	0v1
CNN2	0.508702	0.395	0.189	7.1658e-38	0v1
ENSSSCG00000001063	0.539124	0.209	0.054	1.17009e-37	0v1
PTP4A2	0.483839	0.54	0.32	4.53857e-36	0v1
ZC3HAV1	0.557554	0.263	0.094	5.80922e-36	0v1
BTF3	0.272766	0.924	0.869	1.13765e-34	0v1
ENSSSCG00000039581	0.648087	0.322	0.145	7.92469e-34	0v1
HSP90AB1	0.421164	0.704	0.555	2.68258e-32	0v1
GMFG	0.414018	0.637	0.448	1.26781e-31	0v1
ENSSSCG00000012178	0.573943	0.351	0.177	1.60489e-31	0v1
ENSSSCG00000033721	0.310796	0.884	0.819	1.94101e-31	0v1
EIF4A1	0.468269	0.466	0.275	5.66068e-31	0v1
TLE5	0.433837	0.44	0.247	2.39366e-30	0v1
RNF149	0.456886	0.23	0.08	3.21318e-30	0v1
EPB41	0.480119	0.286	0.12	5.67767e-30	0v1
PDCD4	0.537961	0.24	0.091	6.53086e-30	0v1
ATRX	0.417281	0.51	0.316	2.34488e-28	0v1
ENSSSCG00000027675	0.506164	0.248	0.099	3.9413e-28	0v1
ARL6IP5	0.45497	0.406	0.22	4.33374e-28	0v1
2020-09-06	0.422404	0.507	0.319	1.29727e-27	0v1
MIF	0.352712	0.739	0.579	3.07314e-27	0v1
ENSSSCG00000035869	0.533812	0.251	0.107	9.30391e-27	0v1
UBL3	0.437416	0.281	0.128	3.90583e-25	0v1
PSME1	0.419783	0.377	0.21	4.36026e-24	0v1
NME1	0.422099	0.205	0.078	1.14077e-23	0v1
SRSF2	0.427299	0.591	0.429	4.96644e-23	0v1
GUK1	0.40949	0.278	0.132	7.56901e-23	0v1
SCML4	0.418434	0.269	0.126	2.78204e-22	0v1
FGD3	0.39704	0.243	0.108	2.31523e-21	0v1
LNPEP	0.437222	0.298	0.154	4.92589e-21	0v1
SELENOH	0.373249	0.271	0.133	4.44729e-20	0v1
EMP3	0.317392	0.646	0.49	4.81757e-20	0v1
PNRC1	0.299919	0.587	0.418	5.33777e-19	0v1
ENSSSCG00000005656	0.329576	0.578	0.421	1.53853e-18	0v1
HNRNPDL	0.356091	0.596	0.443	6.37585e-18	0v1
MRPS15	0.338007	0.254	0.124	7.613e-18	0v1
TAF1D	0.328731	0.425	0.265	1.28578e-17	0v1
ENSSSCG00000001097	0.378435	0.4	0.254	5.44853e-17	0v1
ND1	0.275224	0.755	0.597	1.50782e-16	0v1
PPP1CC	0.368766	0.473	0.325	1.59582e-16	0v1
RGCC	0.377686	0.266	0.14	2.25353e-16	0v1
GSTA4	0.369191	0.21	0.1	1.45346e-15	0v1
CAPN1	0.389355	0.218	0.107	2.01524e-15	0v1
FAXDC2	0.374353	0.39	0.249	3.73771e-15	0v1
STAT1	0.372877	0.409	0.273	5.73622e-15	0v1
GLIPR2	0.317909	0.23	0.117	9.1342e-15	0v1
TGFB1	0.312654	0.248	0.129	1.52537e-14	0v1
PSIP1	0.308735	0.519	0.374	1.84993e-14	0v1
FYB1	0.30377	0.468	0.319	2.35651e-14	0v1
VIM	0.335228	0.338	0.209	2.41225e-14	0v1
HMGN3	0.318123	0.497	0.354	2.57931e-14	0v1
BZW1	0.328913	0.5	0.353	2.98607e-14	0v1
ENSSSCG00000035048	0.326616	0.203	0.098	3.22156e-14	0v1
STK26	0.327073	0.23	0.118	4.48961e-14	0v1
ETS1	0.304333	0.614	0.47	4.75392e-14	0v1
PCBP2	0.378489	0.335	0.211	4.93971e-14	0v1
TNRC6B	0.334208	0.259	0.143	1.32731e-13	0v1
GPX4	0.310925	0.384	0.253	6.35541e-13	0v1
SS18L2	0.294528	0.235	0.125	7.81087e-13	0v1
TIMM13	0.291375	0.241	0.131	1.67554e-12	0v1
NAP1L1	0.259697	0.55	0.41	6.605e-12	0v1
CEBPB	0.35115	0.203	0.107	8.03381e-12	0v1
CHRAC1	0.278042	0.334	0.209	8.3757e-12	0v1
POLR2F	0.291313	0.331	0.212	3.49634e-11	0v1
ATP5MC1	0.268031	0.297	0.185	1.07965e-10	0v1
SIGIRR	0.278618	0.208	0.113	3.85503e-10	0v1
CDKN2AIPNL	0.262673	0.279	0.17	6.11486e-10	0v1
TRMT112	0.258235	0.467	0.349	8.77977e-10	0v1
ACP1	0.272658	0.373	0.256	1.2114e-09	0v1
ENSSSCG00000027565	0.276963	0.38	0.259	1.38604e-09	0v1
CCT2	0.279323	0.418	0.302	2.54972e-09	0v1
NOP56	0.275494	0.227	0.132	3.46313e-09	0v1
PRMT1	0.269688	0.255	0.155	6.20148e-09	0v1
ENSSSCG00000016758	0.258888	0.542	0.424	6.23457e-09	0v1
CDKN1B	0.307359	0.202	0.114	8.75936e-09	0v1
GNAI3	0.303525	0.243	0.151	1.26758e-08	0v1
CRLF3	0.25743	0.349	0.237	1.87728e-08	0v1
MCL1	0.27255	0.339	0.235	6.99112e-08	0v1
MEAF6	0.273756	0.205	0.121	1.3129e-07	0v1
CACYBP	0.257759	0.352	0.253	1.49449e-07	0v1
ADH5	0.250705	0.214	0.128	2.01394e-07	0v1
ENSSSCG00000031912	0.354691	0.27	0.188	1.10766e-06	0v1
SUCLG2	0.257189	0.257	0.168	1.16884e-06	0v1
RASGRP1	0.261073	0.218	0.136	1.86567e-06	0v1
CD52	3.07463	0.945	0.185	0	0v10
ENSSSCG00000037885	2.82482	0.853	0.059	0	0v10
ENSSSCG00000033721	2.63852	0.884	0.072	0	0v10
CD3G	2.22107	0.791	0.037	3.18433e-288	0v10
ENSSSCG00000012119	0.640578	1	1	2.7407e-274	0v10
CD3E	2.0258	0.742	0.044	5.44038e-255	0v10
TRAT1	2.08264	0.712	0.01	5.66356e-249	0v10
CCR7	1.94092	0.758	0.106	6.99993e-247	0v10
CD2	1.98414	0.706	0.045	7.82355e-235	0v10
B2M	0.555229	1	1	1.59901e-219	0v10
CTSW	1.95787	0.689	0.061	1.80612e-218	0v10
CTSC	1.61153	0.715	0.271	1.25235e-172	0v10
LCK	1.56932	0.571	0.065	2.37704e-157	0v10
LEF1	1.69025	0.531	0.017	5.99161e-157	0v10
IFITM3	1.29676	0.806	0.519	3.37515e-154	0v10
CD247	1.52132	0.586	0.102	7.13044e-147	0v10
TCF7	1.45757	0.546	0.081	1.29291e-138	0v10
EVL	1.13574	0.758	0.511	3.40958e-138	0v10
PTPRC	0.853042	0.895	0.814	3.97098e-134	0v10
CD5	1.525	0.48	0.019	2.20698e-133	0v10
SKAP1	1.46557	0.493	0.034	5.55079e-133	0v10
FYB1	1.41181	0.468	0.021	3.43812e-128	0v10
SRGN	1.26689	0.687	0.374	1.2204e-117	0v10
TPT1	0.67695	0.996	0.999	4.91483e-117	0v10
ENSSSCG00000001229	0.506499	0.996	0.999	1.66481e-114	0v10
SAT1	1.20963	0.708	0.448	7.85465e-108	0v10
ENSSSCG00000014565	0.681366	0.944	0.882	1.2435e-107	0v10
CD3D	1.29409	0.403	0.016	6.32023e-105	0v10
ENSSSCG00000026140	1.39411	0.441	0.061	4.19318e-101	0v10
LAT	1.30507	0.438	0.059	8.19098e-101	0v10
STMN1	1.37822	0.554	0.19	1.10782e-100	0v10
LAPTM5	0.916368	0.746	0.542	2.2526e-100	0v10
HCST	1.23739	0.51	0.154	2.77542e-95	0v10
IL7R	1.18177	0.327	0.008	7.00258e-82	0v10
ENSSSCG00000036096	1.21499	0.446	0.118	1.21047e-81	0v10
CAMK4	1.09639	0.321	0.006	4.62466e-81	0v10
FTL	0.63202	0.915	0.882	1.12998e-79	0v10
RCAN3	1.1848	0.377	0.057	2.49084e-78	0v10
EMP3	0.949351	0.646	0.435	5.19265e-77	0v10
UBB	0.485702	0.967	0.97	8.76104e-77	0v10
DAPL1	1.11255	0.344	0.033	3.28329e-76	0v10
ENSSSCG00000003691	0.676002	0.843	0.828	4.08383e-76	0v10
ENSSSCG00000039581	1.27255	0.322	0.017	7.86748e-76	0v10
ZFP36L2	1.0063	0.653	0.39	2.03745e-74	0v10
RPS16	0.257522	1	1	5.461e-73	0v10
ENSSSCG00000000576	0.660022	0.841	0.822	4.37958e-72	0v10
PDK1	1.08755	0.344	0.045	4.07793e-71	0v10
SOD1	0.929683	0.617	0.443	1.82881e-65	0v10
ITM2B	0.98051	0.579	0.368	2.93405e-64	0v10
JAK1	0.912997	0.638	0.499	5.314e-64	0v10
PVRIG	0.934992	0.283	0.017	8.68833e-64	0v10
SELL	0.970855	0.557	0.309	2.81988e-63	0v10
ARHGDIB	0.458289	0.935	0.963	4.24001e-61	0v10
SMC4	1.12124	0.394	0.125	1.45077e-59	0v10
RGCC	0.966557	0.266	0.022	5.15162e-56	0v10
CHD3	0.96083	0.411	0.168	3.38287e-51	0v10
S100A13	0.934609	0.289	0.054	2.72628e-50	0v10
PLAC8	0.394963	0.966	0.983	8.14316e-50	0v10
UBXN11	0.954332	0.239	0.019	3.18762e-49	0v10
CD4	0.820046	0.212	0.003	7.78881e-49	0v10
FKBP11	0.927308	0.473	0.27	9.85452e-48	0v10
CD63	0.971211	0.405	0.18	1.19387e-47	0v10
GNG2	0.928047	0.434	0.219	7.70413e-45	0v10
RGS10	0.913793	0.342	0.119	1.00814e-43	0v10
SCML4	0.863063	0.269	0.058	2.48859e-42	0v10
GZMB	0.904005	0.253	0.044	9.42554e-42	0v10
ARL4C	0.757018	0.208	0.016	1.4256e-41	0v10
2020-09-06	0.856354	0.507	0.349	1.44028e-41	0v10
S100A4	1.10084	0.331	0.115	4.47046e-41	0v10
ENSSSCG00000033734	0.5693	0.754	0.648	1.35013e-39	0v10
IL6R	0.806243	0.2	0.016	3.04028e-39	0v10
ETS1	0.749921	0.614	0.526	3.60245e-37	0v10
PNRC1	0.727373	0.587	0.5	7.12924e-37	0v10
DDX5	0.432911	0.887	0.913	7.62241e-37	0v10
HSPB1	0.93336	0.403	0.218	1.32766e-35	0v10
HSP90AA1	0.765629	0.647	0.614	1.81909e-35	0v10
ABLIM1	0.779342	0.51	0.374	2.46626e-34	0v10
2020-09-01	0.696026	0.591	0.525	4.57326e-34	0v10
ATRX	0.769397	0.51	0.386	8.95018e-33	0v10
BTG1	0.355256	0.921	0.958	5.70852e-32	0v10
PNRC2	0.794122	0.459	0.314	2.90982e-31	0v10
FUNDC1	0.751228	0.473	0.332	3.14693e-30	0v10
MYL6	0.430506	0.835	0.89	2.86965e-28	0v10
ENSSSCG00000001341	0.417526	0.855	0.903	1.11435e-27	0v10
GSTA4	0.703446	0.21	0.053	1.18739e-27	0v10
BIN2	0.737216	0.398	0.243	2.92919e-27	0v10
LNPEP	0.793744	0.298	0.132	5.71924e-27	0v10
ID2	0.900663	0.374	0.208	1.40098e-26	0v10
ISCU	0.707138	0.482	0.379	2.84697e-25	0v10
FYN	0.657676	0.212	0.062	7.77687e-25	0v10
TMEM123	0.542848	0.643	0.62	1.37868e-24	0v10
TLE5	0.700851	0.44	0.323	1.98147e-24	0v10
BTG2	0.718714	0.27	0.12	3.01823e-22	0v10
LMO4	0.706647	0.229	0.085	7.20565e-22	0v10
ENSSSCG00000001063	0.65115	0.209	0.067	1.28645e-21	0v10
EPB41	0.691385	0.286	0.137	1.57168e-21	0v10
S1PR1	0.686816	0.424	0.31	2.95249e-21	0v10
PSIP1	0.644619	0.519	0.475	4.13766e-20	0v10
H3F3B	0.48238	0.917	0.956	5.34695e-20	0v10
ENSSSCG00000004145	0.559392	0.618	0.601	5.61679e-20	0v10
SNRK	0.650905	0.21	0.076	7.7244e-20	0v10
TRAF3IP3	0.548035	0.584	0.582	8.14802e-19	0v10
ATP6V1G1	0.460615	0.666	0.704	1.87109e-18	0v10
UTRN	0.658868	0.285	0.149	2.64559e-18	0v10
ENSSSCG00000016758	0.583629	0.542	0.504	4.67085e-18	0v10
FGD3	0.647441	0.243	0.113	1.04566e-17	0v10
RASSF5	0.610118	0.201	0.077	2.51214e-17	0v10
CD69	0.756876	0.311	0.186	5.90706e-17	0v10
ENSSSCG00000001398	0.544117	0.538	0.5	2.42735e-16	0v10
SASH3	0.635689	0.322	0.209	1.39753e-15	0v10
BZW1	0.640001	0.5	0.466	2.14392e-15	0v10
PRKACB	0.643896	0.287	0.171	5.69151e-15	0v10
TBC1D20	0.570761	0.234	0.113	8.05849e-15	0v10
MBNL1	0.602925	0.517	0.478	9.02805e-15	0v10
CDKN1B	0.651986	0.202	0.088	9.41857e-15	0v10
ARL6IP1	0.654444	0.38	0.291	2.26257e-14	0v10
ENSSSCG00000003520	0.442728	0.654	0.697	2.6754e-14	0v10
ENSSSCG00000014540	0.351195	0.875	0.927	9.25137e-14	0v10
LCP1	0.517176	0.623	0.671	7.52427e-13	0v10
RNF149	0.563916	0.23	0.12	9.10993e-13	0v10
RESF1	0.590903	0.27	0.161	9.91745e-13	0v10
CFL1	0.260568	0.927	0.976	1.59043e-12	0v10
S100A10	0.397142	0.529	0.445	4.36746e-12	0v10
NCK1	0.657769	0.22	0.117	7.00624e-12	0v10
ZNF292	0.560356	0.233	0.129	1.04146e-11	0v10
COX7A2L	0.290662	0.776	0.871	2.31839e-11	0v10
ADD3	0.551309	0.417	0.353	2.95036e-11	0v10
CCND3	0.561297	0.367	0.283	4.42176e-11	0v10
STK4	0.614896	0.334	0.255	5.89369e-11	0v10
SUSD3	0.556323	0.26	0.166	3.83845e-10	0v10
HMGN3	0.518321	0.497	0.493	6.16321e-10	0v10
PIK3R1	0.587343	0.227	0.135	3.41019e-09	0v10
ENSSSCG00000036350	0.295363	0.757	0.842	9.49252e-09	0v10
CEBPB	0.575995	0.203	0.114	1.17471e-08	0v10
ZC3HAV1	0.601539	0.263	0.18	1.34286e-08	0v10
GMFG	0.396442	0.637	0.708	1.48805e-08	0v10
RASSF1	0.506541	0.212	0.125	3.40479e-08	0v10
NDFIP2	0.596958	0.233	0.149	4.15522e-08	0v10
SON	0.415397	0.59	0.643	4.45589e-08	0v10
NSD3	0.552069	0.272	0.192	5.57224e-08	0v10
NDFIP1	0.578111	0.279	0.202	9.75075e-08	0v10
SLC9A3R1	0.484319	0.326	0.253	2.36071e-07	0v10
SH3KBP1	0.512825	0.256	0.176	2.3699e-07	0v10
PFN1	0.302605	0.747	0.799	2.9051e-07	0v10
CGGBP1	0.546053	0.326	0.267	3.69714e-07	0v10
TSC22D3	0.58244	0.275	0.199	5.08961e-07	0v10
NUCKS1	0.544485	0.433	0.421	6.76377e-07	0v10
CALM1	0.381659	0.609	0.677	9.63227e-07	0v10
ENSSSCG00000006919	0.539645	0.237	0.16	1.24144e-06	0v10
STK26	0.50256	0.23	0.151	1.69808e-06	0v10
CLINT1	0.522575	0.221	0.146	3.28606e-06	0v10
ENSSSCG00000031897	0.524571	0.243	0.172	5.13462e-06	0v10
ENSSSCG00000017213	0.445674	0.523	0.572	8.65043e-06	0v10
STK17B	0.550472	0.357	0.314	1.07899e-05	0v10
RAP1B	0.45457	0.523	0.565	2.62233e-05	0v10
ENSSSCG00000009327	0.329855	0.696	0.792	4.42601e-05	0v10
CAPN1	0.522505	0.218	0.149	5.01337e-05	0v10
MAX	0.489335	0.423	0.414	7.40613e-05	0v10
MAP3K1	0.557418	0.299	0.241	7.52384e-05	0v10
RCN2	0.455361	0.209	0.139	8.07096e-05	0v10
DNAJA1	0.446354	0.461	0.478	0.000225024	0v10
ENSSSCG00000005518	0.438823	0.313	0.263	0.000256081	0v10
CRLF3	0.49617	0.349	0.314	0.000273806	0v10
GAPDH	0.256395	0.661	0.727	0.000488994	0v10
SF3B1	0.470052	0.457	0.479	0.000670385	0v10
HMGN2	0.382768	0.551	0.601	0.000683654	0v10
CAPG	0.497606	0.256	0.199	0.000848978	0v10
ENSSSCG00000022912	0.4795	0.396	0.393	0.0021291	0v10
PNISR	0.370013	0.567	0.656	0.00220319	0v10
CAP1	0.406733	0.513	0.571	0.00265922	0v10
ANKRD12	0.446843	0.414	0.418	0.00574491	0v10
HMOX2	0.515426	0.286	0.248	0.00688604	0v10
SIGIRR	0.432478	0.208	0.156	0.0128659	0v10
2020-09-07	0.392453	0.527	0.6	0.0157833	0v10
ENSSSCG00000039658	0.480482	0.233	0.185	0.0209909	0v10
TNRC6B	0.478046	0.259	0.216	0.0241765	0v10
TMBIM6	0.401049	0.455	0.489	0.0304105	0v10
ENSSSCG00000033733	0.351566	0.541	0.619	0.0341094	0v10
CNBP	0.349115	0.529	0.601	0.0381208	0v10
ENSSSCG00000007188	0.349407	0.563	0.648	0.0469711	0v10
CD52	3.28784	0.945	0.106	0	0v11
ENSSSCG00000037885	2.86925	0.853	0.032	0	0v11
ENSSSCG00000033721	2.55417	0.884	0.077	0	0v11
CD3G	2.24348	0.791	0.026	5.70551e-285	0v11
CCR7	2.07682	0.758	0.036	2.1905e-260	0v11
CD3E	2.05742	0.742	0.03	1.24261e-254	0v11
TRAT1	2.07104	0.712	0.012	6.24689e-243	0v11
CD2	1.96743	0.706	0.03	5.98687e-232	0v11
CTSW	1.99661	0.689	0.051	2.81004e-218	0v11
ENSSSCG00000012119	0.444092	1	1	4.32806e-176	0v11
TPT1	0.872161	0.996	0.972	3.52065e-170	0v11
LCK	1.63814	0.571	0.022	4.34403e-169	0v11
CD247	1.6853	0.586	0.045	8.82336e-167	0v11
IFITM3	1.34425	0.806	0.437	9.2048e-163	0v11
CTSC	1.484	0.715	0.233	1.1199e-161	0v11
EVL	1.25481	0.758	0.354	1.95145e-158	0v11
KXD1	0.475677	0.999	0.988	9.48054e-155	0v11
LEF1	1.66501	0.531	0.016	1.01094e-152	0v11
RPS16	0.434383	1	0.998	7.52788e-149	0v11
ENSSSCG00000038507	0.511844	0.999	0.998	2.18187e-148	0v11
ENSSSCG00000034617	0.328882	1	1	5.1651e-147	0v11
TCF7	1.42921	0.546	0.059	1.14184e-138	0v11
ENSSSCG00000014855	0.423797	0.997	0.995	5.09852e-134	0v11
SKAP1	1.47577	0.493	0.024	1.47593e-133	0v11
CD5	1.5334	0.48	0.013	1.35907e-132	0v11
RPLP2	0.489918	0.995	0.988	5.45513e-130	0v11
FYB1	1.42824	0.468	0.01	1.50098e-129	0v11
RPL35	0.346957	1	0.999	1.89174e-125	0v11
RPL23	0.332716	1	0.999	2.88467e-119	0v11
STMN1	1.47497	0.554	0.122	2.99426e-117	0v11
ENSSSCG00000014565	0.727855	0.944	0.795	1.4341e-114	0v11
LAPTM5	0.961307	0.746	0.399	6.81819e-113	0v11
RPS3A	0.315566	1	1	7.28741e-111	0v11
ENSSSCG00000039544	0.364142	0.998	0.996	5.34375e-107	0v11
SELL	1.24344	0.557	0.151	6.929e-105	0v11
CD3D	1.30524	0.403	0.01	8.06858e-105	0v11
HCST	1.24023	0.51	0.103	2.72182e-104	0v11
LAT	1.299	0.438	0.042	4.65476e-103	0v11
ENSSSCG00000026140	1.33616	0.441	0.051	9.60144e-99	0v11
ENSSSCG00000017239	0.385722	0.996	0.992	1.05187e-97	0v11
ENSSSCG00000036096	1.26364	0.446	0.079	2.53699e-92	0v11
ENSSSCG00000034448	0.292776	1	1	7.39492e-88	0v11
ENSSSCG00000014569	0.276406	1	0.999	2.27945e-85	0v11
ENSSSCG00000004970	0.250362	1	1	1.0741e-84	0v11
RCAN3	1.18046	0.377	0.032	6.98389e-84	0v11
HSD11B1L	0.299158	0.999	0.998	7.95774e-84	0v11
IL7R	1.19777	0.327	0.001	2.82797e-83	0v11
ENSSSCG00000000576	0.709085	0.841	0.706	3.22566e-82	0v11
RPL22	0.413259	0.979	0.955	5.32323e-81	0v11
CAMK4	1.09779	0.321	0.004	7.04629e-80	0v11
DAPL1	1.11274	0.344	0.019	1.02307e-79	0v11
FKBP11	1.08896	0.473	0.132	1.84965e-79	0v11
ENSSSCG00000039581	1.29693	0.322	0.006	3.81156e-79	0v11
SAT1	0.938353	0.708	0.428	1.89537e-78	0v11
SRGN	0.922363	0.687	0.42	5.28544e-78	0v11
ENSSSCG00000035768	0.252008	1	1	9.2086e-75	0v11
PDK1	1.08316	0.344	0.033	3.35984e-73	0v11
SOD1	0.907661	0.617	0.343	4.28011e-71	0v11
RGS10	1.0295	0.342	0.046	3.48621e-67	0v11
PVRIG	0.927154	0.283	0.011	2.03624e-64	0v11
RPL10	0.27857	1	1	9.39954e-64	0v11
ETS1	0.861229	0.614	0.343	1.58491e-61	0v11
ENSSSCG00000033019	0.384029	0.966	0.937	3.52574e-61	0v11
RGCC	0.956202	0.266	0.018	4.28929e-56	0v11
S100A4	1.14634	0.331	0.064	8.38833e-56	0v11
RPS21	0.379806	0.953	0.937	4.28897e-55	0v11
GZMB	0.947045	0.253	0.018	3.38776e-52	0v11
GNG2	0.896305	0.434	0.166	3.67674e-52	0v11
2020-09-06	0.844545	0.507	0.259	3.95025e-51	0v11
PTPRC	0.47616	0.895	0.816	4.53931e-51	0v11
UBXN11	0.946954	0.239	0.012	8.68617e-51	0v11
SCML4	0.872757	0.269	0.035	1.16285e-48	0v11
CD69	0.98622	0.311	0.072	8.80183e-47	0v11
JAK1	0.697756	0.638	0.44	1.43449e-46	0v11
CHD3	0.845718	0.411	0.161	1.51366e-46	0v11
CD4	0.809663	0.212	0.005	2.0241e-46	0v11
ARL4C	0.775635	0.208	0.006	4.15692e-45	0v11
ZFP36L2	0.671547	0.653	0.396	6.52855e-44	0v11
IL6R	0.831495	0.2	0.004	8.63879e-44	0v11
ENSSSCG00000033697	0.313258	0.983	0.971	2.0509e-43	0v11
ABLIM1	0.767694	0.51	0.28	1.00819e-42	0v11
SMC4	0.924631	0.394	0.161	1.46589e-42	0v11
TMEM123	0.641737	0.643	0.449	7.78082e-42	0v11
FUNDC1	0.722869	0.473	0.258	8.43667e-37	0v11
HSPB1	0.84355	0.403	0.19	1.10626e-36	0v11
ENSSSCG00000004145	0.657368	0.618	0.459	2.31335e-36	0v11
BIN2	0.714597	0.398	0.176	3.33475e-36	0v11
RPS23	0.278692	0.989	0.99	5.56574e-36	0v11
S100A13	0.75559	0.289	0.082	1.69004e-35	0v11
PLAC8	0.351248	0.966	0.946	1.76268e-35	0v11
EMP3	0.573302	0.646	0.488	2.81898e-35	0v11
GMFG	0.602836	0.637	0.477	3.79542e-35	0v11
PNRC2	0.715341	0.459	0.248	7.69229e-35	0v11
ITM2B	0.64556	0.579	0.401	1.67814e-34	0v11
RPS13	0.27067	0.964	0.976	2.18254e-31	0v11
UTRN	0.693974	0.285	0.09	3.76098e-31	0v11
CD63	0.6884	0.405	0.201	4.24909e-31	0v11
ENSSSCG00000033500	0.333212	0.939	0.918	5.66619e-31	0v11
ISCU	0.637477	0.482	0.286	6.50762e-31	0v11
GSTA4	0.680344	0.21	0.038	6.7208e-31	0v11
LNPEP	0.742641	0.298	0.106	1.18424e-30	0v11
HSP90AA1	0.656648	0.647	0.534	3.32587e-30	0v11
SSR4	0.433833	0.729	0.649	6.65357e-29	0v11
EPB41	0.68107	0.286	0.098	8.51027e-29	0v11
GAPDH	0.48928	0.661	0.545	3.44692e-27	0v11
ATRX	0.604604	0.51	0.341	9.58509e-27	0v11
FYN	0.598646	0.212	0.049	1.12043e-26	0v11
ENSSSCG00000003691	0.377021	0.843	0.794	2.1151e-25	0v11
ACTG1	0.446558	0.831	0.819	9.19773e-25	0v11
LMO4	0.657637	0.229	0.072	9.90074e-24	0v11
ITGA4	0.617593	0.238	0.078	1.653e-23	0v11
SNRK	0.620526	0.21	0.058	2.28481e-23	0v11
TLE5	0.577333	0.44	0.283	1.45694e-22	0v11
ENSSSCG00000001063	0.601739	0.209	0.058	1.68563e-22	0v11
ENSSSCG00000006081	0.284451	0.894	0.888	1.26661e-21	0v11
BZW1	0.586606	0.5	0.362	9.8213e-21	0v11
ENSSSCG00000006919	0.628258	0.237	0.089	1.01458e-20	0v11
S1PR1	0.591568	0.424	0.276	1.43751e-20	0v11
MYL6	0.356459	0.835	0.796	1.90878e-20	0v11
TBC1D20	0.550342	0.234	0.085	7.34196e-20	0v11
PSIP1	0.495708	0.519	0.389	6.74297e-19	0v11
STK4	0.579435	0.334	0.183	1.35352e-18	0v11
2020-09-01	0.448888	0.591	0.478	1.99964e-18	0v11
BTG2	0.596862	0.27	0.123	3.35727e-18	0v11
CDKN1B	0.567358	0.202	0.067	6.86375e-18	0v11
SLC9A3R1	0.530754	0.326	0.175	1.08451e-17	0v11
ZC3HAV1	0.5965	0.263	0.122	1.38105e-17	0v11
NCK1	0.613489	0.22	0.087	5.07474e-17	0v11
ENSSSCG00000016758	0.473506	0.542	0.427	1.49491e-16	0v11
ENSSSCG00000031897	0.580828	0.243	0.113	5.19272e-16	0v11
FGD3	0.53592	0.243	0.109	7.62971e-16	0v11
ENSSSCG00000022912	0.549382	0.396	0.266	1.20061e-15	0v11
ZNF292	0.482049	0.233	0.104	8.26794e-15	0v11
RASSF5	0.498991	0.201	0.078	8.27162e-15	0v11
RNF149	0.506016	0.23	0.103	8.4725e-15	0v11
PRKACB	0.530892	0.287	0.156	3.24483e-14	0v11
SUSD3	0.509371	0.26	0.133	6.47218e-14	0v11
MAP3K1	0.571274	0.299	0.176	1.12342e-12	0v11
RESF1	0.49698	0.27	0.145	1.55111e-12	0v11
PIK3R1	0.533959	0.227	0.11	1.94728e-12	0v11
ENSSSCG00000001097	0.465467	0.4	0.278	7.04251e-12	0v11
PNRC1	0.365525	0.587	0.517	1.15402e-11	0v11
TRAF3IP3	0.361299	0.584	0.501	2.96639e-11	0v11
RBM38	0.445493	0.219	0.106	2.99311e-11	0v11
HSPE1	0.34039	0.655	0.615	7.03283e-11	0v11
SSR2	0.265675	0.81	0.78	7.92857e-11	0v11
ARL6IP1	0.47199	0.38	0.266	9.88382e-11	0v11
CGGBP1	0.462122	0.326	0.213	1.10434e-10	0v11
SH3KBP1	0.426744	0.256	0.14	1.25725e-10	0v11
SIGIRR	0.449751	0.208	0.103	2.56106e-10	0v11
ENSSSCG00000024973	0.536502	0.279	0.17	3.74077e-10	0v11
LCP1	0.383915	0.623	0.569	6.59201e-10	0v11
PFN1	0.306512	0.747	0.716	1.33915e-09	0v11
CLINT1	0.441932	0.221	0.116	2.4486e-09	0v11
STK17B	0.452511	0.357	0.249	5.15997e-09	0v11
SASH3	0.415611	0.322	0.217	1.42922e-08	0v11
MBNL1	0.401628	0.517	0.441	1.76359e-08	0v11
CEBPB	0.450652	0.203	0.11	1.46003e-07	0v11
STK26	0.423325	0.23	0.135	2.30818e-07	0v11
CALM1	0.305843	0.609	0.564	5.6505e-07	0v11
GPX4	0.399486	0.384	0.297	1.19005e-06	0v11
ENSSSCG00000034709	0.391501	0.434	0.36	1.19652e-06	0v11
ENSSSCG00000003520	0.288125	0.654	0.627	1.62239e-06	0v11
ENSSSCG00000014850	0.42021	0.372	0.29	1.6276e-06	0v11
ISG15	0.423718	0.331	0.225	2.67798e-06	0v11
CRLF3	0.380489	0.349	0.26	2.70701e-06	0v11
RASSF1	0.372402	0.212	0.123	2.75191e-06	0v11
ENSSSCG00000009625	0.3606	0.205	0.118	4.26517e-06	0v11
NSD3	0.398645	0.272	0.185	1.34505e-05	0v11
ENSSSCG00000033733	0.310525	0.541	0.492	3.69252e-05	0v11
NDFIP1	0.402244	0.279	0.197	4.96842e-05	0v11
STAT1	0.404521	0.409	0.345	9.71693e-05	0v11
CD53	0.379935	0.351	0.285	0.000121595	0v11
ENSSSCG00000017213	0.287894	0.523	0.472	0.000383189	0v11
CAPN1	0.407347	0.218	0.146	0.000609764	0v11
CAPG	0.375992	0.256	0.183	0.000964907	0v11
MRPS15	0.350718	0.254	0.183	0.00110173	0v11
HMGN3	0.292171	0.497	0.45	0.00135236	0v11
ENSSSCG00000012397	0.328847	0.357	0.289	0.00202781	0v11
NDFIP2	0.376712	0.233	0.164	0.00270171	0v11
DNAJA1	0.32219	0.461	0.428	0.00277158	0v11
ADD3	0.276084	0.417	0.354	0.00729008	0v11
SETX	0.3278	0.264	0.195	0.00889292	0v11
ENSSSCG00000026064	0.270167	0.243	0.172	0.0138869	0v11
SRSF10	0.341503	0.347	0.287	0.0150883	0v11
TNRC6B	0.332363	0.259	0.191	0.0162224	0v11
ENSSSCG00000039706	0.334326	0.284	0.223	0.0271079	0v11
NUCKS1	0.295714	0.433	0.39	0.0383712	0v11
ENSSSCG00000000576	0.656386	0.841	0.657	7.18653e-71	0v12
IFITM3	0.69785	0.806	0.642	9.09862e-65	0v12
STMN1	0.890983	0.554	0.254	2.71471e-56	0v12
CD4	0.787943	0.212	0.01	9.39948e-43	0v12
SH3BGRL3	0.449968	0.839	0.708	7.79656e-40	0v12
IL6R	0.758042	0.2	0.017	9.75087e-36	0v12
CD52	0.354338	0.945	0.868	1.13012e-28	0v12
ENSSSCG00000014565	0.310061	0.944	0.893	7.01829e-26	0v12
S100A10	0.513734	0.529	0.335	1.57974e-25	0v12
EVL	0.369359	0.758	0.647	3.00482e-25	0v12
SMC4	0.592711	0.394	0.209	2.69223e-22	0v12
S100A4	0.757735	0.331	0.16	1.22097e-21	0v12
NDFIP2	0.583037	0.233	0.076	3.96764e-21	0v12
SRGN	0.432414	0.687	0.568	2.99816e-19	0v12
ENSSSCG00000003691	0.31913	0.843	0.763	1.43527e-18	0v12
ENSSSCG00000037885	0.383579	0.853	0.794	1.1361e-17	0v12
TRAT1	0.346575	0.712	0.582	2.24839e-17	0v12
ENSSSCG00000014540	0.325243	0.875	0.81	4.79166e-17	0v12
ARPC1B	0.358835	0.696	0.595	6.82154e-17	0v12
DDX5	0.26075	0.887	0.804	4.53067e-15	0v12
CD5	0.452654	0.48	0.329	5.15469e-15	0v12
KLF2	0.393684	0.554	0.426	4.12204e-14	0v12
HSPB1	0.515132	0.403	0.268	8.19706e-14	0v12
CAMK4	0.45977	0.321	0.179	2.76168e-13	0v12
IFI6	0.702087	0.38	0.245	3.8429e-13	0v12
CD2	0.300635	0.706	0.606	1.82197e-12	0v12
SAMHD1	0.455761	0.215	0.096	4.78051e-12	0v12
ENSSSCG00000006395	0.460506	0.294	0.165	5.144e-12	0v12
TUBA1B	0.373253	0.55	0.425	1.29431e-11	0v12
CCR7	0.275783	0.758	0.659	1.41216e-11	0v12
EMP3	0.306913	0.646	0.542	1.86125e-11	0v12
FGD3	0.388625	0.243	0.127	2.05744e-09	0v12
ENSSSCG00000036114	0.370578	0.498	0.39	2.7612e-09	0v12
H3F3B	0.277766	0.917	0.872	2.95096e-09	0v12
HSP90AA1	0.384248	0.647	0.588	5.18158e-09	0v12
ENSSSCG00000004145	0.309914	0.618	0.534	1.10142e-07	0v12
PPP1R18	0.330418	0.436	0.327	1.4875e-07	0v12
ISG15	0.518266	0.331	0.22	1.86526e-07	0v12
ITM2B	0.303695	0.579	0.484	2.04644e-07	0v12
PNRC2	0.311928	0.459	0.36	3.50182e-06	0v12
MRPS15	0.326901	0.254	0.156	4.14079e-06	0v12
FYB1	0.27167	0.468	0.375	4.46677e-05	0v12
MAP3K1	0.375614	0.299	0.21	6.40379e-05	0v12
ATRX	0.252733	0.51	0.41	0.000228562	0v12
LAT	0.282643	0.438	0.35	0.000364969	0v12
SCML4	0.272374	0.269	0.185	0.00267527	0v12
S100A13	0.291227	0.289	0.21	0.00467227	0v12
APBB1IP	0.293491	0.307	0.232	0.0183527	0v12
ENSSSCG00000037885	2.85736	0.853	0.042	0	0v13
ENSSSCG00000033721	2.65803	0.884	0.057	0	0v13
ENSSSCG00000038507	0.988475	0.999	0.998	0	0v13
RPL34	0.880308	1	1	0	0v13
RPS16	0.855388	1	0.999	0	0v13
ENSSSCG00000003042	0.829367	1	1	0	0v13
ENSSSCG00000034617	0.826555	1	1	0	0v13
RPS27	0.817209	1	1	0	0v13
RPS3A	0.79802	1	1	0	0v13
ENSSSCG00000035080	0.733995	1	1	0	0v13
HSD11B1L	0.754021	0.999	0.998	2.765e-301	0v13
ENSSSCG00000036296	0.665795	0.999	1	4.99487e-298	0v13
ENSSSCG00000035768	0.650585	1	1	4.23743e-292	0v13
RPL35	0.673182	1	1	4.06686e-288	0v13
RPL9	0.671064	1	0.999	1.51032e-286	0v13
ENSSSCG00000003930	0.5728	1	1	3.08502e-277	0v13
CD3G	2.1946	0.791	0.052	3.48876e-270	0v13
ENSSSCG00000034448	0.650326	1	1	8.51092e-269	0v13
RPL23	0.586871	1	1	3.37224e-267	0v13
ENSSSCG00000040273	0.575636	1	1	4.73661e-259	0v13
CCR7	2.15771	0.758	0.023	5.34702e-259	0v13
RPS15	0.563462	1	1	8.56721e-259	0v13
ENSSSCG00000031088	0.495257	1	1	3.16228e-246	0v13
CD3E	2.06493	0.742	0.046	5.02462e-244	0v13
TRAT1	2.04076	0.712	0.037	5.06926e-229	0v13
RPL37	0.502976	1	1	1.46532e-223	0v13
ENSSSCG00000011272	0.564662	0.999	0.997	3.41577e-222	0v13
CTSW	1.99412	0.689	0.049	1.01452e-210	0v13
RPL6	0.52691	1	1	2.63473e-210	0v13
RPS18	0.554209	1	0.999	1.33228e-209	0v13
ENSSSCG00000039544	0.553419	0.998	0.999	4.4518e-208	0v13
LTB	1.98449	0.678	0.041	1.94128e-207	0v13
ENSSSCG00000014855	0.532922	0.997	1	3.45899e-200	0v13
ENSSSCG00000035811	0.43076	1	1	2.26599e-197	0v13
RPL11	0.455724	1	1	1.78869e-186	0v13
ENSSSCG00000014569	0.424176	1	1	1.28015e-185	0v13
TMEM123	1.82106	0.643	0.076	5.96361e-182	0v13
ENSSSCG00000025928	0.519399	0.997	1	1.25257e-181	0v13
ENSSSCG00000008170	0.592386	0.992	0.998	2.25425e-181	0v13
RPL22	0.662237	0.979	0.992	2.66023e-177	0v13
ETS1	1.82198	0.614	0.048	3.61367e-175	0v13
RPL3	0.594125	0.992	0.995	4.88055e-174	0v13
ARHGDIB	0.866889	0.935	0.956	4.65037e-168	0v13
CD247	1.74271	0.586	0.035	1.79162e-166	0v13
2020-09-01	1.67797	0.591	0.043	5.92813e-166	0v13
CD2	1.51219	0.706	0.26	1.17601e-158	0v13
LCK	1.61525	0.571	0.04	5.22949e-157	0v13
RAC2	0.985836	0.865	0.892	3.49352e-156	0v13
RPS26	0.434885	1	1	6.84256e-156	0v13
RPS9	0.444718	0.999	1	1.64894e-150	0v13
LEF1	1.69177	0.531	0.014	6.80965e-150	0v13
TCF7	1.56772	0.546	0.041	2.61507e-146	0v13
BTG1	0.825129	0.921	0.945	2.46055e-139	0v13
RPL17-C18orf32	0.465607	0.997	0.999	3.0226e-137	0v13
RPL7	0.461044	0.999	0.999	3.60635e-133	0v13
ABLIM1	1.54875	0.51	0.039	3.26982e-132	0v13
ENSSSCG00000029830	0.362741	0.999	0.999	2.8995e-131	0v13
RPS14	0.476512	0.999	1	4.20694e-131	0v13
ENSSSCG00000017239	0.414921	0.996	1	1.8059e-128	0v13
RPS11	0.392857	0.999	1	1.83803e-128	0v13
ENSSSCG00000024974	0.511603	0.986	0.997	3.13734e-128	0v13
RPS6	0.44407	0.998	1	6.24576e-128	0v13
LIMD2	1.41329	0.695	0.397	3.39481e-127	0v13
EVL	1.15979	0.758	0.641	5.31873e-127	0v13
SKAP1	1.48325	0.493	0.037	7.46706e-126	0v13
RPL39	0.374977	0.999	0.999	9.40089e-125	0v13
RPS5	0.410943	0.996	0.999	4.71224e-124	0v13
ENSSSCG00000013597	0.435916	0.996	1	8.07059e-124	0v13
ENSSSCG00000033733	1.48163	0.541	0.106	1.73313e-122	0v13
CD5	1.5129	0.48	0.037	2.15988e-120	0v13
RPL5	0.684795	0.935	0.946	2.16571e-117	0v13
ENSSSCG00000026140	1.50577	0.441	0.011	3.17241e-115	0v13
ENSSSCG00000036716	0.432286	0.989	0.998	6.64932e-113	0v13
STMN1	1.64849	0.554	0.16	1.95162e-112	0v13
SOD1	1.38844	0.617	0.296	2.15166e-109	0v13
RPLP2	0.412363	0.995	1	2.43653e-109	0v13
SIT1	1.37926	0.453	0.039	3.43032e-109	0v13
S1PR1	1.34573	0.424	0.022	4.34494e-105	0v13
RPL7A	0.365419	0.995	0.998	7.99248e-105	0v13
ENSSSCG00000011952	0.452014	0.978	1	1.87121e-104	0v13
PSIP1	1.38835	0.519	0.154	2.09646e-99	0v13
CD3D	1.30927	0.403	0.022	1.44743e-97	0v13
DDX5	0.71301	0.887	0.942	9.55665e-87	0v13
ENSSSCG00000020830	0.385209	0.986	0.999	1.02156e-86	0v13
ENSSSCG00000033500	0.560093	0.939	0.978	1.0085e-82	0v13
DAPL1	1.16972	0.344	0.009	1.30017e-82	0v13
IL7R	1.19075	0.327	0.003	2.43575e-79	0v13
KXD1	0.268691	0.999	1	9.94755e-76	0v13
ENSSSCG00000033697	0.412552	0.983	0.995	9.39692e-75	0v13
CAMK4	1.09435	0.321	0.011	2.2575e-74	0v13
ENSSSCG00000009303	0.328192	0.993	0.999	3.63654e-74	0v13
ENSSSCG00000039581	1.27928	0.322	0.018	2.0485e-71	0v13
ENSSSCG00000013064	0.408477	0.961	0.988	2.35865e-71	0v13
CD69	1.25454	0.311	0.013	1.50638e-70	0v13
CORO1A	0.623522	0.858	0.951	4.56615e-70	0v13
ENSSSCG00000033019	0.379985	0.966	0.992	8.88827e-69	0v13
ENSSSCG00000039046	0.381076	0.972	0.997	5.33384e-68	0v13
SMC4	1.26383	0.394	0.101	1.62736e-66	0v13
RCAN3	1.16284	0.377	0.084	2.41088e-65	0v13
GNG2	1.14074	0.434	0.153	4.82807e-64	0v13
ENSSSCG00000006081	0.487012	0.894	0.981	1.11841e-62	0v13
GPR174	1.04899	0.306	0.028	1.91681e-62	0v13
TLE5	1.1063	0.44	0.187	5.87733e-59	0v13
ENSSSCG00000001398	1.13682	0.538	0.358	8.08081e-59	0v13
ENSSSCG00000017509	0.271167	0.993	0.999	3.35951e-58	0v13
RPS21	0.371241	0.953	0.988	4.11477e-58	0v13
PTPRC	0.51502	0.895	0.962	4.23606e-58	0v13
PVRIG	0.929276	0.283	0.023	6.19417e-58	0v13
2020-09-06	1.12394	0.507	0.301	8.82287e-58	0v13
PDK1	1.06772	0.344	0.075	1.41069e-57	0v13
SCML4	0.966668	0.269	0.014	2.71742e-57	0v13
CHD3	1.11967	0.411	0.154	1.40711e-56	0v13
TRAF3IP3	1.02818	0.584	0.468	1.99816e-56	0v13
ENSSSCG00000027573	0.356191	0.965	0.995	4.47567e-56	0v13
ADD3	1.07274	0.417	0.162	5.92969e-56	0v13
ARL6IP5	1.07608	0.406	0.165	3.41263e-52	0v13
ATRX	1.02427	0.51	0.327	1.84758e-50	0v13
LAT	1.0776	0.438	0.24	4.57464e-46	0v13
CD4	0.815456	0.212	0.005	8.29789e-45	0v13
KLF2	0.926095	0.554	0.444	8.78039e-43	0v13
GSTA4	0.791355	0.21	0.012	1.14715e-41	0v13
TBC1D10C	0.805924	0.239	0.032	5.87766e-41	0v13
GZMB	0.896176	0.253	0.051	2.93809e-37	0v13
ENSSSCG00000036096	0.947025	0.446	0.274	6.85964e-37	0v13
FADS3	0.807317	0.267	0.067	2.84581e-36	0v13
PNRC1	0.842782	0.587	0.574	3.62324e-36	0v13
TMA7	0.542551	0.758	0.878	6.21323e-35	0v13
EIF4A2	0.472537	0.811	0.926	3.64364e-34	0v13
RPS13	0.272244	0.964	1	6.40149e-34	0v13
UTRN	0.8406	0.285	0.094	2.28955e-33	0v13
ENSSSCG00000033734	0.503204	0.754	0.556	6.70245e-33	0v13
SPTBN1	0.820653	0.251	0.072	5.65942e-31	0v13
CNN2	0.878268	0.395	0.239	9.53715e-31	0v13
ENSSSCG00000001097	0.941802	0.4	0.248	9.77221e-31	0v13
ARL4C	0.719529	0.208	0.041	1.51011e-29	0v13
RASGRP1	0.780288	0.218	0.049	4.02564e-29	0v13
HCST	0.816127	0.51	0.429	1.28211e-28	0v13
JAK1	0.637436	0.638	0.7	3.1982e-26	0v13
PNISR	0.794664	0.567	0.602	7.33876e-26	0v13
ENSSSCG00000004945	0.262024	0.937	0.988	1.75208e-25	0v13
RASGRP2	0.898281	0.309	0.155	4.59179e-25	0v13
SNRPN	0.73528	0.217	0.068	4.51762e-23	0v13
COX7A2L	0.409521	0.776	0.906	4.96955e-23	0v13
NPM1	0.382016	0.824	0.944	4.33339e-22	0v13
TPT1	0.324577	0.996	1	1.49182e-19	0v13
SERBP1	0.461629	0.706	0.849	1.52595e-19	0v13
LNPEP	0.812145	0.298	0.171	1.30751e-18	0v13
EPB41	0.772867	0.286	0.156	1.35963e-18	0v13
PTPRCAP	0.719624	0.541	0.594	4.43953e-18	0v13
STK26	0.701715	0.23	0.099	5.35554e-18	0v13
STK17B	0.809829	0.357	0.263	3.59625e-16	0v13
2020-09-07	0.733815	0.527	0.582	5.72035e-16	0v13
ZFP36L2	0.646409	0.653	0.773	5.99227e-16	0v13
ENSSSCG00000009327	0.482247	0.696	0.846	2.18852e-14	0v13
EEF1D	0.378828	0.701	0.868	2.98893e-14	0v13
PNRC2	0.731388	0.459	0.449	1.06615e-13	0v13
ENSSSCG00000005656	0.590701	0.578	0.687	2.02218e-13	0v13
SIGIRR	0.62867	0.208	0.1	5.55514e-13	0v13
HMOX2	0.784185	0.286	0.19	1.01463e-12	0v13
STK38	0.692058	0.247	0.143	1.23883e-12	0v13
EIF3K	0.274071	0.806	0.953	1.70483e-12	0v13
HNRNPDL	0.617042	0.596	0.725	9.46691e-12	0v13
SRSF2	0.643913	0.591	0.717	9.89121e-12	0v13
RASSF5	0.600523	0.201	0.1	3.3528e-11	0v13
SASH3	0.693468	0.322	0.246	5.66932e-11	0v13
LCP1	0.542383	0.623	0.763	2.47219e-09	0v13
ENSSSCG00000028485	0.2768	0.816	0.951	2.49708e-09	0v13
MALT1	0.632336	0.224	0.139	2.03031e-08	0v13
RGCC	0.600444	0.266	0.18	3.36044e-08	0v13
ENSSSCG00000001063	0.633028	0.209	0.127	8.66319e-08	0v13
ENSSSCG00000034868	0.688115	0.293	0.228	9.66869e-08	0v13
ZNF292	0.610092	0.233	0.158	2.50367e-07	0v13
ENSSSCG00000039658	0.60103	0.233	0.152	2.62623e-07	0v13
SUMO2	0.304143	0.726	0.901	2.87083e-07	0v13
ENSSSCG00000014343	0.673061	0.4	0.398	3.33404e-07	0v13
SNRK	0.598944	0.21	0.132	5.39667e-07	0v13
BIN1	0.609213	0.219	0.143	7.31013e-07	0v13
HBB	1.24405	0.287	0.197	1.62667e-06	0v13
TBC1D20	0.597689	0.234	0.163	1.70704e-06	0v13
S100A13	0.649003	0.289	0.24	1.94013e-05	0v13
ENSSSCG00000007188	0.507038	0.563	0.72	2.41515e-05	0v13
RBM38	0.558931	0.219	0.154	3.79526e-05	0v13
UBXN11	0.679085	0.239	0.18	7.13146e-05	0v13
FGD3	0.618607	0.243	0.189	0.000123483	0v13
TNRC6B	0.622504	0.259	0.211	0.000324326	0v13
ARGLU1	0.619647	0.43	0.49	0.000589929	0v13
SRSF5	0.661767	0.461	0.541	0.000706397	0v13
PPP1CC	0.606032	0.473	0.575	0.00110256	0v13
ENSSSCG00000022912	0.560301	0.396	0.405	0.00115452	0v13
SF3B1	0.601925	0.457	0.547	0.00141301	0v13
ENSSSCG00000007978	0.819108	0.249	0.177	0.00236781	0v13
MIF	0.267461	0.739	0.92	0.00613805	0v13
NUCKS1	0.581808	0.433	0.494	0.00633152	0v13
SON	0.396908	0.59	0.774	0.00636247	0v13
FBL	0.546366	0.217	0.172	0.0117098	0v13
PRKACB	0.612999	0.287	0.268	0.0163762	0v13
MBNL1	0.551641	0.517	0.665	0.0201668	0v13
BTG2	0.556631	0.27	0.235	0.0218001	0v13
CNBP	0.459024	0.529	0.696	0.0306892	0v13
NAP1L1	0.413332	0.55	0.677	0.031084	0v13
ENSSSCG00000000071	0.341186	0.607	0.792	0.0348792	0v13
ISCU	0.51546	0.482	0.603	0.0371086	0v13
RPS27	0.981737	1	1	0	0v14
RPL34	0.745303	1	1	0	0v14
ENSSSCG00000040273	0.733279	1	1	0	0v14
ENSSSCG00000034617	0.683209	1	1	0	0v14
ENSSSCG00000003042	0.692197	1	1	1.71187e-303	0v14
RPL11	0.648356	1	1	1.0978e-280	0v14
PLAC8	1.61896	0.966	0.78	3.46883e-278	0v14
RPL35	0.671266	1	0.999	6.72166e-274	0v14
RPL37	0.640578	1	1	4.19088e-272	0v14
RPS3A	0.621347	1	1	1.81668e-271	0v14
RPL23	0.642597	1	0.999	1.14431e-260	0v14
BTG1	1.63564	0.921	0.769	8.03054e-258	0v14
RPS15	0.527732	1	1	3.81496e-248	0v14
ENSSSCG00000031088	0.513449	1	1	4.94875e-245	0v14
HSD11B1L	0.628571	0.999	1	4.50945e-243	0v14
ENSSSCG00000035080	0.581064	1	1	4.3122e-240	0v14
RPS14	0.717512	0.999	0.997	6.06556e-237	0v14
ENSSSCG00000003930	0.486777	1	1	1.10373e-236	0v14
ENSSSCG00000038507	0.661465	0.999	1	4.29832e-235	0v14
ENSSSCG00000039544	0.629248	0.998	0.999	3.16532e-231	0v14
ENSSSCG00000035768	0.508375	1	1	3.08459e-224	0v14
CCR7	1.90283	0.758	0.12	3.60324e-219	0v14
ENSSSCG00000011272	0.576016	0.999	0.999	1.6475e-218	0v14
ENSSSCG00000013597	0.678537	0.996	0.994	2.83289e-213	0v14
RPS16	0.562482	1	1	9.49636e-213	0v14
RPL9	0.522097	1	1	3.83163e-211	0v14
ENSSSCG00000034448	0.502746	1	1	1.37378e-199	0v14
ENSSSCG00000014855	0.523316	0.997	1	1.99447e-191	0v14
ENSSSCG00000017239	0.573896	0.996	1	6.04835e-190	0v14
ENSSSCG00000025928	0.542022	0.997	1	7.15597e-185	0v14
RPS9	0.515116	0.999	1	2.40664e-184	0v14
ENSSSCG00000036296	0.439726	0.999	1	1.23122e-180	0v14
KXD1	0.434654	0.999	1	4.08317e-155	0v14
ENSSSCG00000035811	0.384247	1	1	3.34976e-154	0v14
RPL10	0.41798	1	1	2.48186e-141	0v14
RPL6	0.395372	1	1	9.14744e-141	0v14
ENSSSCG00000039740	0.405164	0.998	1	3.22889e-140	0v14
EVL	1.31806	0.758	0.503	1.02426e-139	0v14
ENSSSCG00000020830	0.540721	0.986	0.993	1.16697e-135	0v14
RPL39	0.382333	0.999	1	1.47631e-128	0v14
DDX5	0.92074	0.887	0.896	4.29163e-127	0v14
B2M	0.460147	1	0.99	2.29098e-125	0v14
ENSSSCG00000008170	0.450804	0.992	0.997	1.13931e-123	0v14
CD52	0.813754	0.945	0.828	9.3569e-116	0v14
IFITM3	1.11157	0.806	0.711	7.27434e-114	0v14
EEF1B2	0.610233	0.958	0.984	1.2957e-110	0v14
ENSSSCG00000004970	0.267669	1	1	5.9212e-109	0v14
TPT1	0.639513	0.996	0.998	2.49277e-101	0v14
ENSSSCG00000001229	0.474744	0.996	0.966	3.53506e-93	0v14
RPL22	0.426347	0.979	0.992	8.77634e-93	0v14
SELL	1.34103	0.557	0.212	4.92504e-91	0v14
TRAT1	1.0914	0.712	0.575	4.84618e-90	0v14
ENSSSCG00000014569	0.256088	1	1	3.42119e-89	0v14
ENSSSCG00000004489	0.325561	0.999	1	5.41181e-88	0v14
RPL26	0.293433	1	1	4.97804e-87	0v14
RPS20	0.25424	1	1	8.28626e-80	0v14
RPS5	0.310295	0.996	1	3.98607e-79	0v14
RPS26	0.264698	1	1	7.57637e-75	0v14
ENSSSCG00000026140	1.33342	0.441	0.125	3.44701e-72	0v14
LEF1	1.1834	0.531	0.246	1.10083e-69	0v14
ENSSSCG00000013064	0.395056	0.961	0.989	8.22488e-67	0v14
TMEM123	1.04527	0.643	0.523	1.88301e-65	0v14
RPL17-C18orf32	0.306563	0.997	0.999	5.78867e-65	0v14
RPL3	0.308482	0.992	0.999	4.33666e-64	0v14
TCF7	1.03252	0.546	0.294	5.66923e-64	0v14
EIF4A2	0.668943	0.811	0.92	9.34668e-64	0v14
LTB	0.897564	0.678	0.519	1.5511e-62	0v14
CTSC	0.947032	0.715	0.752	4.69097e-60	0v14
ENSSSCG00000033500	0.464817	0.939	0.988	7.17399e-56	0v14
IL7R	1.08471	0.327	0.054	1.23579e-55	0v14
CD2	0.8175	0.706	0.739	1.67829e-55	0v14
COX7A2L	0.61541	0.776	0.897	1.04781e-52	0v14
PDK1	1.07601	0.344	0.083	1.27345e-52	0v14
PNRC1	1.03222	0.587	0.501	9.3887e-49	0v14
ENSSSCG00000037885	0.6257	0.853	0.862	1.4255e-48	0v14
ENSSSCG00000014565	0.403753	0.944	0.916	5.56692e-47	0v14
PABPC1	0.485451	0.861	0.958	1.70973e-45	0v14
ENSSSCG00000036716	0.25147	0.989	1	4.24362e-43	0v14
EIF3K	0.453726	0.806	0.949	1.10491e-41	0v14
PTPRC	0.426079	0.895	0.94	2.8096e-37	0v14
ENSSSCG00000006081	0.353738	0.894	0.984	5.13725e-34	0v14
CD3E	0.498217	0.742	0.78	1.76665e-32	0v14
ENSSSCG00000033734	0.447484	0.754	0.573	9.26928e-31	0v14
ZFP36L2	0.817291	0.653	0.703	1.08044e-29	0v14
SSR2	0.411672	0.81	0.952	4.60484e-28	0v14
ENSSSCG00000001341	0.427089	0.855	0.942	4.84736e-28	0v14
ENSSSCG00000006418	0.77435	0.592	0.63	9.17215e-28	0v14
RPL5	0.315471	0.935	0.988	2.47893e-27	0v14
CD3G	0.46383	0.791	0.853	1.7227e-26	0v14
ENSSSCG00000033721	0.386521	0.884	0.849	2.09471e-26	0v14
SCML4	0.83665	0.269	0.111	7.19478e-24	0v14
EEF2	0.324562	0.908	0.984	1.44255e-23	0v14
PNISR	0.804267	0.567	0.626	4.17629e-22	0v14
RCAN3	0.891332	0.377	0.252	1.31065e-21	0v14
ENSSSCG00000000576	0.392868	0.841	0.932	1.75944e-21	0v14
FADS3	0.573228	0.267	0.102	3.68078e-21	0v14
ABLIM1	0.858132	0.51	0.518	2.81721e-20	0v14
CD69	1.01998	0.311	0.18	1.52821e-19	0v14
ATP6V1G1	0.562202	0.666	0.833	2.47368e-19	0v14
CD5	0.755028	0.48	0.412	6.24898e-19	0v14
CD37	0.801474	0.486	0.486	5.34664e-17	0v14
RGS10	0.874869	0.342	0.237	6.05479e-17	0v14
DAPL1	0.795139	0.344	0.234	1.76625e-16	0v14
S1PR1	0.809077	0.424	0.375	2.50402e-15	0v14
CD4	0.653636	0.212	0.088	3.11407e-15	0v14
SAT1	0.532885	0.708	0.864	3.46858e-15	0v14
EMP3	0.512733	0.646	0.796	1.51465e-13	0v14
ATRX	0.702308	0.51	0.585	7.61757e-11	0v14
IL6R	0.69978	0.2	0.099	9.03897e-11	0v14
ENSSSCG00000001063	0.674552	0.209	0.11	2.44065e-10	0v14
BTG2	0.685709	0.27	0.176	4.11244e-10	0v14
RPL36AL	0.272382	0.817	0.957	2.77119e-09	0v14
RASGRP1	0.263886	0.218	0.441	3.1056e-09	0v14
ENSSSCG00000011121	0.258369	0.224	0.45	7.02685e-09	0v14
ARHGAP15	0.74672	0.429	0.44	1.12774e-08	0v14
ENSSSCG00000001398	0.654489	0.538	0.67	1.54662e-08	0v14
NDFIP1	0.253574	0.279	0.55	4.26291e-08	0v14
ENSSSCG00000022912	0.795453	0.396	0.4	1.17566e-07	0v14
ENSSSCG00000011117	0.271947	0.207	0.409	1.27666e-07	0v14
KLF3	0.273835	0.162	0.323	1.36996e-07	0v14
GNAI3	0.319459	0.243	0.48	2.77425e-07	0v14
BPTF	0.253478	0.203	0.393	5.74138e-07	0v14
ITSN2	0.265251	0.203	0.397	6.27776e-07	0v14
LRP10	0.256292	0.18	0.348	2.86111e-06	0v14
CTSW	0.261612	0.689	0.736	3.08132e-06	0v14
ENSSSCG00000027790	0.288642	0.161	0.312	6.23538e-06	0v14
FYB1	0.596602	0.468	0.528	8.01939e-06	0v14
TSC22D3	0.750742	0.275	0.219	1.26885e-05	0v14
CETN3	0.284959	0.216	0.407	1.43981e-05	0v14
RASAL3	0.250379	0.163	0.311	1.87154e-05	0v14
LNPEP	0.75662	0.298	0.257	2.10259e-05	0v14
TBC1D10C	0.254411	0.239	0.447	2.46126e-05	0v14
PIK3R1	0.276001	0.227	0.42	3.44899e-05	0v14
TASOR	0.255332	0.181	0.339	4.07278e-05	0v14
TRAM1	0.279522	0.32	0.607	5.55742e-05	0v14
CHD3	0.730531	0.411	0.452	7.9273e-05	0v14
PDCD4	0.675695	0.24	0.179	8.08054e-05	0v14
UBE2B	0.280853	0.31	0.583	0.000116418	0v14
SKAP1	0.619359	0.493	0.612	0.000143409	0v14
2020-09-01	0.472888	0.591	0.8	0.000200837	0v14
ENSSSCG00000013661	0.33122	0.638	0.875	0.000324336	0v14
ITM2B	0.476271	0.579	0.762	0.000416219	0v14
ENSSSCG00000023792	0.703245	0.311	0.286	0.000459882	0v14
MEAF6	0.3059	0.205	0.37	0.000836689	0v14
TGFB1	0.303254	0.248	0.451	0.00102164	0v14
LENG8	0.256215	0.146	0.265	0.00129028	0v14
LBH	0.283235	0.199	0.357	0.00131696	0v14
AKAP9	0.261418	0.26	0.458	0.00262339	0v14
CUTA	0.270272	0.305	0.549	0.00308901	0v14
FKBP11	0.591106	0.473	0.583	0.00317644	0v14
SLC44A2	0.287972	0.171	0.306	0.00382834	0v14
CTSS	0.27531	0.172	0.302	0.00478446	0v14
ATF7IP	0.265885	0.199	0.349	0.00561501	0v14
GSTA4	0.590628	0.21	0.16	0.0073628	0v14
ENSSSCG00000028097	0.250431	0.16	0.281	0.00941915	0v14
ENSSSCG00000028035	0.26954	0.188	0.331	0.011099	0v14
MDM4	0.255513	0.153	0.27	0.0139435	0v14
ENSSSCG00000017165	0.272906	0.169	0.296	0.0175868	0v14
TXNIP	0.609783	0.224	0.176	0.0239109	0v14
ZNF292	0.274302	0.233	0.404	0.024386	0v14
DCAF8	0.27837	0.164	0.285	0.0284363	0v14
FGD3	0.640492	0.243	0.209	0.0286251	0v14
LAPTM4A	0.271576	0.186	0.321	0.0295503	0v14
CD81	0.279925	0.33	0.584	0.0392762	0v14
SYAP1	0.314404	0.162	0.281	0.0434879	0v14
ZRANB2	0.294125	0.352	0.63	0.0488039	0v14
CD52	3.15405	0.945	0.117	0	0v15
ENSSSCG00000033721	2.62358	0.884	0.045	0	0v15
ENSSSCG00000037885	2.85999	0.853	0.038	5.59984e-298	0v15
CD3G	2.21538	0.791	0.031	3.91141e-261	0v15
CCR7	2.03056	0.758	0.047	1.33192e-236	0v15
CD3E	2.05765	0.742	0.03	7.69122e-235	0v15
TRAT1	2.07073	0.712	0.01	4.3355e-224	0v15
CD2	1.99697	0.706	0.019	1.13776e-217	0v15
ENSSSCG00000012119	0.518664	1	1	1.012e-203	0v15
CTSW	1.93046	0.689	0.056	3.53786e-197	0v15
CTSC	1.62808	0.715	0.156	1.54346e-171	0v15
LCK	1.61433	0.571	0.027	3.56832e-152	0v15
IFITM3	1.28265	0.806	0.423	1.1717e-145	0v15
CD247	1.56308	0.586	0.058	3.11082e-143	0v15
LEF1	1.6736	0.531	0.013	1.20956e-141	0v15
TPT1	0.809676	0.996	0.97	1.2673e-141	0v15
TCF7	1.47361	0.546	0.039	1.19301e-134	0v15
EVL	1.12223	0.758	0.372	1.93621e-132	0v15
CD5	1.52846	0.48	0.014	2.13666e-121	0v15
KXD1	0.430856	0.999	0.986	1.1021e-120	0v15
FYB1	1.4333	0.468	0.008	9.0924e-120	0v15
STMN1	1.53009	0.554	0.095	5.98632e-117	0v15
SKAP1	1.3949	0.493	0.038	8.21552e-115	0v15
ENSSSCG00000038507	0.449436	0.999	0.999	5.0566e-113	0v15
LAPTM5	1.0176	0.746	0.383	5.64673e-113	0v15
RPS16	0.363137	1	1	2.07041e-108	0v15
HCST	1.29448	0.51	0.077	1.72615e-104	0v15
SRGN	1.12204	0.687	0.304	9.38897e-104	0v15
RPLP2	0.44172	0.995	0.984	3.91083e-101	0v15
CD3D	1.31646	0.403	0.007	2.05825e-97	0v15
ENSSSCG00000000576	0.827921	0.841	0.612	3.73917e-97	0v15
LAT	1.29977	0.438	0.037	4.16917e-96	0v15
ENSSSCG00000036096	1.30206	0.446	0.043	1.04574e-95	0v15
ENSSSCG00000014855	0.350668	0.997	0.997	9.52767e-90	0v15
ENSSSCG00000034617	0.258951	1	1	6.45868e-89	0v15
RPL23	0.283807	1	1	3.44346e-82	0v15
ENSSSCG00000026140	1.22014	0.441	0.069	5.88022e-81	0v15
RPL35	0.269693	1	1	2.06693e-78	0v15
RPS3A	0.264134	1	1	4.00695e-75	0v15
IL7R	1.18597	0.327	0.002	5.34125e-75	0v15
SELL	1.00433	0.557	0.209	1.20486e-71	0v15
ENSSSCG00000039581	1.28652	0.322	0.008	3.78411e-71	0v15
ENSSSCG00000039544	0.304008	0.998	0.998	9.2777e-71	0v15
CAMK4	1.08128	0.321	0.01	4.05465e-70	0v15
PDK1	1.09346	0.344	0.024	4.51131e-70	0v15
RCAN3	1.09071	0.377	0.047	5.08145e-69	0v15
FKBP11	1.02867	0.473	0.14	1.94864e-68	0v15
ENSSSCG00000034448	0.267868	1	1	3.58962e-68	0v15
DAPL1	1.03778	0.344	0.027	1.38503e-67	0v15
SOD1	0.873014	0.617	0.31	1.04649e-65	0v15
RPL10	0.28917	1	0.999	6.19217e-63	0v15
ENSSSCG00000017239	0.310733	0.996	0.99	3.08556e-62	0v15
SAT1	0.818229	0.708	0.451	2.52996e-61	0v15
RGS10	1.00035	0.342	0.047	4.28741e-60	0v15
PVRIG	0.931891	0.283	0.009	1.62051e-59	0v15
SMC4	1.03671	0.394	0.103	1.232e-54	0v15
ENSSSCG00000014565	0.45948	0.944	0.823	1.92886e-54	0v15
CHD3	0.924235	0.411	0.119	2.72288e-53	0v15
PTPRC	0.509867	0.895	0.763	5.38784e-53	0v15
2020-09-06	0.85466	0.507	0.222	1.50566e-52	0v15
RPL22	0.336313	0.979	0.96	3.62191e-52	0v15
S100A4	1.13379	0.331	0.061	5.98915e-52	0v15
RGCC	0.949729	0.266	0.015	7.43003e-52	0v15
GNG2	0.866792	0.434	0.145	7.51451e-50	0v15
JAK1	0.707055	0.638	0.398	4.92523e-47	0v15
ACTG1	0.618197	0.831	0.76	5.12195e-47	0v15
GZMB	0.936871	0.253	0.018	5.58883e-47	0v15
S100A13	0.890888	0.289	0.042	7.62267e-47	0v15
EMP3	0.655552	0.646	0.399	1.36214e-45	0v15
SCML4	0.863391	0.269	0.035	3.4045e-44	0v15
CD4	0.824446	0.212	0.001	5.12066e-44	0v15
UBXN11	0.92609	0.239	0.017	5.76984e-44	0v15
ARL4C	0.784062	0.208	0.001	4.20231e-43	0v15
RPS21	0.338561	0.953	0.924	1.13369e-41	0v15
ENSSSCG00000033019	0.31842	0.966	0.95	1.23907e-41	0v15
CD69	0.951437	0.311	0.078	6.2717e-40	0v15
IL6R	0.82406	0.2	0.005	2.40325e-39	0v15
ITM2B	0.681447	0.579	0.358	3.19975e-38	0v15
ENSSSCG00000004145	0.654213	0.618	0.399	6.04584e-37	0v15
PNRC2	0.743533	0.459	0.223	8.50175e-37	0v15
HSP90AA1	0.725958	0.647	0.49	5.92609e-36	0v15
ABLIM1	0.669727	0.51	0.28	3.44025e-34	0v15
FUNDC1	0.690439	0.473	0.245	1.00974e-33	0v15
BIN2	0.69076	0.398	0.174	2.68716e-32	0v15
HSPB1	0.796444	0.403	0.189	3.32722e-32	0v15
GAPDH	0.544286	0.661	0.519	6.22734e-32	0v15
ZFP36L2	0.577031	0.653	0.421	4.02849e-31	0v15
CD63	0.675891	0.405	0.186	2.43015e-30	0v15
GSTA4	0.672434	0.21	0.032	8.0859e-30	0v15
ISCU	0.624746	0.482	0.268	4.83682e-29	0v15
UTRN	0.65989	0.285	0.085	6.42539e-29	0v15
ENSSSCG00000003691	0.398157	0.843	0.752	7.41597e-29	0v15
ATRX	0.623177	0.51	0.307	8.13286e-29	0v15
ETS1	0.58786	0.614	0.434	1.27041e-27	0v15
LNPEP	0.68984	0.298	0.102	2.6626e-27	0v15
EPB41	0.675119	0.286	0.098	3.33137e-26	0v15
FYN	0.604967	0.212	0.043	7.12784e-26	0v15
S1PR1	0.607215	0.424	0.23	5.87047e-25	0v15
PSIP1	0.554749	0.519	0.32	5.94491e-25	0v15
LMO4	0.658781	0.229	0.062	5.96751e-24	0v15
SASH3	0.601894	0.322	0.137	3.93195e-23	0v15
PLAC8	0.280094	0.966	0.966	2.56825e-22	0v15
ENSSSCG00000031897	0.615505	0.243	0.079	2.79298e-22	0v15
SSR4	0.387652	0.729	0.626	5.86232e-22	0v15
SNRK	0.616421	0.21	0.056	8.32651e-22	0v15
BZW1	0.553751	0.5	0.32	1.1848e-20	0v15
LCP1	0.5226	0.623	0.481	2.39664e-20	0v15
STK4	0.571783	0.334	0.159	4.37017e-20	0v15
GMFG	0.448342	0.637	0.495	8.17029e-20	0v15
ENSSSCG00000006919	0.587828	0.237	0.082	1.00124e-19	0v15
ENSSSCG00000001063	0.577655	0.209	0.059	1.27847e-19	0v15
NCK1	0.62287	0.22	0.07	1.34788e-19	0v15
FGD3	0.557939	0.243	0.087	4.64653e-19	0v15
2020-09-01	0.429198	0.591	0.442	1.52008e-17	0v15
ENSSSCG00000016758	0.479326	0.542	0.392	1.80852e-17	0v15
TBC1D20	0.501281	0.234	0.084	2.54305e-17	0v15
MYL6	0.330661	0.835	0.779	8.48257e-17	0v15
CGGBP1	0.503776	0.326	0.167	1.8653e-16	0v15
ENSSSCG00000022912	0.540779	0.396	0.24	1.89443e-16	0v15
SLC9A3R1	0.489161	0.326	0.167	3.77711e-16	0v15
ENSSSCG00000024973	0.576567	0.279	0.132	1.01696e-15	0v15
BTG2	0.515235	0.27	0.121	2.19736e-15	0v15
PRKACB	0.519	0.287	0.138	2.53445e-15	0v15
STK17B	0.506123	0.357	0.198	2.91688e-15	0v15
RNF149	0.489103	0.23	0.089	2.99455e-15	0v15
ZNF292	0.491583	0.233	0.094	4.00538e-15	0v15
CLINT1	0.502239	0.221	0.086	6.42196e-15	0v15
TRAF3IP3	0.406336	0.584	0.455	9.38358e-15	0v15
CDKN1B	0.537765	0.202	0.073	2.23738e-14	0v15
HMGN3	0.447483	0.497	0.359	3.79776e-14	0v15
ID2	0.542886	0.374	0.221	7.19414e-14	0v15
RASSF5	0.477095	0.201	0.076	1.66198e-13	0v15
SH3KBP1	0.444313	0.256	0.117	2.21283e-13	0v15
ARL6IP1	0.477412	0.38	0.232	2.57756e-13	0v15
SUSD3	0.481739	0.26	0.126	3.07938e-13	0v15
SSR2	0.267815	0.81	0.757	1.37468e-12	0v15
ZC3HAV1	0.512971	0.263	0.134	2.61537e-12	0v15
HSPE1	0.356756	0.655	0.59	3.02255e-12	0v15
NUCKS1	0.460882	0.433	0.301	7.49936e-12	0v15
RASSF1	0.43944	0.212	0.09	8.62591e-12	0v15
STK26	0.43843	0.23	0.104	1.19705e-11	0v15
NSD3	0.475781	0.272	0.145	3.49872e-11	0v15
PNRC1	0.364003	0.587	0.481	4.66124e-11	0v15
MBNL1	0.421812	0.517	0.39	5.26553e-11	0v15
PFN1	0.322501	0.747	0.69	5.66367e-11	0v15
EEF1D	0.289031	0.701	0.633	1.14343e-10	0v15
TLE5	0.393077	0.44	0.316	1.35796e-10	0v15
SIGIRR	0.424971	0.208	0.097	1.0863e-09	0v15
PIK3R1	0.453312	0.227	0.116	3.91253e-09	0v15
STAT1	0.440304	0.409	0.297	1.19292e-08	0v15
GPX4	0.39312	0.384	0.265	1.58704e-08	0v15
RESF1	0.396431	0.27	0.152	1.66307e-08	0v15
ENSSSCG00000034709	0.374823	0.434	0.319	3.36792e-08	0v15
ISG15	0.395377	0.331	0.205	5.16074e-08	0v15
NDFIP1	0.430851	0.279	0.169	6.56388e-08	0v15
ENSSSCG00000009625	0.363145	0.205	0.103	1.21662e-07	0v15
TMEM123	0.273029	0.643	0.547	1.85056e-07	0v15
ENSSSCG00000017213	0.345419	0.523	0.431	2.24164e-07	0v15
MAP3K1	0.422763	0.299	0.189	2.68414e-07	0v15
ENSSSCG00000003520	0.269872	0.654	0.564	5.41317e-07	0v15
CEBPB	0.406299	0.203	0.106	9.70883e-07	0v15
TNRC6B	0.403893	0.259	0.159	1.95929e-06	0v15
CAPN1	0.392553	0.218	0.125	7.92339e-06	0v15
CALM1	0.277766	0.609	0.527	8.41493e-06	0v15
TRAM1	0.358245	0.32	0.225	4.69851e-05	0v15
RBM39	0.28337	0.419	0.315	5.99704e-05	0v15
ELF1	0.32658	0.304	0.206	6.40747e-05	0v15
CD53	0.334206	0.351	0.259	6.76322e-05	0v15
ENSSSCG00000012397	0.341011	0.357	0.263	7.62727e-05	0v15
ENSSSCG00000033733	0.277515	0.541	0.466	8.522e-05	0v15
ADD3	0.315477	0.417	0.319	9.85462e-05	0v15
HMGN2	0.285927	0.551	0.473	0.000100426	0v15
DNAJA1	0.319752	0.461	0.381	0.000105838	0v15
APBB1IP	0.361356	0.307	0.22	0.000260561	0v15
CAPG	0.366879	0.256	0.17	0.000292742	0v15
HMOX2	0.342114	0.286	0.197	0.000323849	0v15
CRLF3	0.303739	0.349	0.259	0.000625541	0v15
CCND3	0.308714	0.367	0.279	0.000804919	0v15
HSP90AB1	0.256515	0.704	0.696	0.00140879	0v15
CALCOCO2	0.335892	0.254	0.173	0.00141203	0v15
ENSSSCG00000014850	0.299004	0.372	0.287	0.00226291	0v15
IFI44L	0.300499	0.311	0.227	0.00278435	0v15
SRSF10	0.306184	0.347	0.262	0.00326256	0v15
SETX	0.302066	0.264	0.181	0.00463691	0v15
SAMHD1	0.289648	0.215	0.136	0.00481701	0v15
PDCD4	0.334646	0.24	0.166	0.00880751	0v15
ENSSSCG00000026064	0.263189	0.243	0.165	0.012524	0v15
CYTIP	0.327339	0.383	0.308	0.016296	0v15
NDFIP2	0.343084	0.233	0.164	0.0181469	0v15
ITGA4	0.305117	0.238	0.165	0.0218215	0v15
CHRAC1	0.31759	0.334	0.265	0.0229669	0v15
TMBIM6	0.25367	0.455	0.388	0.0265055	0v15
CD52	2.27179	0.945	0.327	1.29365e-292	0v16
ENSSSCG00000033721	2.29307	0.884	0.19	1.59653e-283	0v16
ENSSSCG00000037885	2.78809	0.853	0.07	6.08085e-283	0v16
CD3G	2.16052	0.791	0.056	2.0348e-247	0v16
CD3E	2.00004	0.742	0.045	3.78776e-222	0v16
TRAT1	2.061	0.712	0.017	8.93199e-216	0v16
CCR7	1.85802	0.758	0.149	1.07036e-207	0v16
CD2	1.85035	0.706	0.079	2.37863e-193	0v16
RPS27	0.476154	1	0.999	1.1939e-191	0v16
CTSW	1.93001	0.689	0.083	1.02994e-185	0v16
PTPRC	1.08149	0.895	0.692	3.12441e-163	0v16
PLAC8	0.898606	0.966	0.845	1.84815e-154	0v16
CTSC	1.58958	0.715	0.269	2.13281e-151	0v16
ENSSSCG00000034617	0.338063	1	1	6.84607e-140	0v16
RPS16	0.42939	1	1	8.74076e-140	0v16
CD247	1.59062	0.586	0.076	3.98783e-137	0v16
LEF1	1.68607	0.531	0.018	2.76623e-136	0v16
RPS3A	0.37669	1	1	1.36469e-135	0v16
IFITM3	1.21994	0.806	0.47	7.40833e-132	0v16
LCK	1.46161	0.571	0.094	6.79101e-126	0v16
RPL35	0.364055	1	1	5.27426e-125	0v16
RPL23	0.372797	1	1	6.62628e-120	0v16
SKAP1	1.46404	0.493	0.028	6.01032e-117	0v16
ENSSSCG00000014855	0.39042	0.997	0.998	9.09661e-117	0v16
FYB1	1.42618	0.468	0.014	1.00862e-113	0v16
EVL	1.04953	0.758	0.498	4.65383e-112	0v16
CD5	1.48741	0.48	0.034	3.07904e-110	0v16
TCF7	1.35535	0.546	0.119	2.35916e-108	0v16
TPT1	0.644109	0.996	0.993	3.38687e-98	0v16
B2M	0.379387	1	1	6.24497e-98	0v16
ENSSSCG00000038507	0.392926	0.999	1	6.24281e-94	0v16
ENSSSCG00000026140	1.39919	0.441	0.047	3.30185e-91	0v16
ENSSSCG00000040273	0.286104	1	1	1.36456e-88	0v16
CD3D	1.27678	0.403	0.027	1.18366e-86	0v16
ENSSSCG00000039544	0.33266	0.998	0.998	3.45049e-86	0v16
RPL9	0.302192	1	1	3.2375e-85	0v16
LAT	1.27752	0.438	0.071	2.28551e-83	0v16
HCST	1.14554	0.51	0.174	5.06724e-75	0v16
ENSSSCG00000036096	1.22705	0.446	0.104	1.48122e-74	0v16
DAPL1	1.16482	0.344	0.013	8.2553e-74	0v16
KXD1	0.296847	0.999	0.994	2.11703e-73	0v16
IL7R	1.1888	0.327	0.005	1.07291e-71	0v16
PDK1	1.12889	0.344	0.023	2.48563e-69	0v16
ENSSSCG00000012119	0.264044	1	0.999	8.16206e-69	0v16
CAMK4	1.09625	0.321	0.008	8.31482e-69	0v16
ENSSSCG00000039581	1.28241	0.322	0.013	5.62246e-67	0v16
RCAN3	1.12462	0.377	0.063	1.00973e-63	0v16
HSD11B1L	0.265642	0.999	1	2.79264e-63	0v16
UBB	0.442768	0.967	0.956	4.01268e-60	0v16
ENSSSCG00000014565	0.456831	0.944	0.913	3.02454e-57	0v16
PVRIG	0.929159	0.283	0.014	1.21861e-55	0v16
JAK1	0.857714	0.638	0.457	2.33892e-54	0v16
SAT1	0.844051	0.708	0.575	2.5941e-53	0v16
ZFP36L2	0.883406	0.653	0.441	1.12384e-52	0v16
ENSSSCG00000000576	0.593199	0.841	0.776	1.16884e-52	0v16
CHD3	1.02767	0.411	0.138	1.67604e-52	0v16
ID2	1.2295	0.374	0.104	7.11925e-51	0v16
FKBP11	0.950726	0.473	0.223	1.62298e-49	0v16
DDX5	0.499309	0.887	0.874	6.48126e-49	0v16
EMP3	0.773705	0.646	0.489	1.04351e-48	0v16
FTL	0.501057	0.915	0.849	1.35361e-48	0v16
RGS10	0.935858	0.342	0.1	6.87831e-43	0v16
S100A13	0.884734	0.289	0.057	4.31296e-41	0v16
ATRX	0.84474	0.51	0.305	4.67945e-40	0v16
SCML4	0.86701	0.269	0.045	5.94317e-40	0v16
SRGN	0.64393	0.687	0.553	8.14667e-40	0v16
CD4	0.809432	0.212	0.008	1.88856e-39	0v16
SOD1	0.717457	0.617	0.488	1.46811e-38	0v16
ARL4C	0.760502	0.208	0.012	4.46715e-37	0v16
ENSSSCG00000001229	0.250984	0.996	0.998	2.62328e-36	0v16
UBXN11	0.912027	0.239	0.036	4.64958e-36	0v16
ENSSSCG00000003691	0.464836	0.843	0.841	5.72999e-36	0v16
GSTA4	0.778762	0.21	0.018	1.59729e-35	0v16
ITM2B	0.718375	0.579	0.427	7.77551e-35	0v16
ABLIM1	0.781584	0.51	0.337	3.25944e-34	0v16
PNRC1	0.68246	0.587	0.439	5.21439e-34	0v16
LNPEP	0.871195	0.298	0.089	6.22055e-34	0v16
IL6R	0.809417	0.2	0.015	9.74879e-34	0v16
GZMB	0.855194	0.253	0.051	4.57747e-33	0v16
CD63	0.828763	0.405	0.21	1.85447e-31	0v16
FADS3	0.68896	0.267	0.064	2.44422e-31	0v16
RGCC	0.845676	0.266	0.071	2.83633e-31	0v16
BTG1	0.323649	0.921	0.91	7.8248e-31	0v16
2020-09-01	0.66932	0.591	0.491	4.23114e-30	0v16
2020-09-06	0.763418	0.507	0.378	8.85261e-29	0v16
FYN	0.713603	0.212	0.04	4.33544e-28	0v16
HSPB1	0.819139	0.403	0.216	6.82001e-28	0v16
TBC1D20	0.699617	0.234	0.07	9.70002e-24	0v16
FUNDC1	0.696324	0.473	0.338	1.18804e-23	0v16
BTG2	0.709851	0.27	0.097	2.10597e-23	0v16
COX7A2L	0.392449	0.776	0.776	5.8088e-22	0v16
HSP90AA1	0.60935	0.647	0.612	2.26482e-21	0v16
ETS1	0.603886	0.614	0.559	4.10719e-21	0v16
SMC4	0.786226	0.394	0.249	1.99337e-20	0v16
BIN2	0.671349	0.398	0.267	7.30733e-19	0v16
S1PR1	0.664532	0.424	0.297	1.11331e-18	0v16
LMO4	0.705182	0.229	0.088	4.73537e-18	0v16
RCN2	0.628826	0.209	0.072	1.59687e-17	0v16
GNG2	0.668964	0.434	0.319	1.80921e-17	0v16
FGD3	0.607741	0.243	0.103	2.90759e-16	0v16
H3F3B	0.443158	0.917	0.936	3.08754e-16	0v16
UTRN	0.618988	0.285	0.142	3.5117e-16	0v16
ENSSSCG00000001341	0.296029	0.855	0.894	4.90728e-16	0v16
NCK1	0.699836	0.22	0.091	2.25478e-15	0v16
PRKACB	0.632028	0.287	0.155	4.40792e-15	0v16
EIF4A2	0.334811	0.811	0.851	8.21551e-15	0v16
ARL6IP1	0.633304	0.38	0.263	1.26215e-14	0v16
PSIP1	0.588463	0.519	0.471	1.86002e-14	0v16
SNRK	0.590642	0.21	0.084	3.18884e-14	0v16
ENSSSCG00000016758	0.532924	0.542	0.492	3.31109e-14	0v16
SUSD3	0.596836	0.26	0.133	5.3833e-14	0v16
EIF3K	0.265642	0.806	0.874	1.2808e-12	0v16
TLE5	0.563419	0.44	0.363	1.48871e-12	0v16
ENSSSCG00000005518	0.552456	0.313	0.196	1.98644e-12	0v16
ZNF292	0.559919	0.233	0.114	2.15159e-12	0v16
ARHGAP15	0.559897	0.429	0.331	9.73986e-12	0v16
ENSSSCG00000001063	0.539901	0.209	0.094	2.86249e-11	0v16
CDKN1B	0.584617	0.202	0.09	2.88277e-11	0v16
PNISR	0.472073	0.567	0.561	5.77943e-11	0v16
ISCU	0.528619	0.482	0.431	5.9944e-11	0v16
S100A4	0.777941	0.331	0.228	1.09107e-10	0v16
CEBPB	0.580077	0.203	0.095	1.35354e-10	0v16
MAX	0.54657	0.423	0.342	2.25651e-10	0v16
SELL	0.371953	0.557	0.46	5.59221e-10	0v16
ATP6V1G1	0.380469	0.666	0.706	8.03769e-10	0v16
TRAF3IP3	0.416261	0.584	0.597	1.0751e-09	0v16
ENSSSCG00000039706	0.482744	0.284	0.174	4.08258e-09	0v16
TMEM123	0.362481	0.643	0.657	6.58133e-09	0v16
ENSSSCG00000027675	0.59264	0.248	0.151	2.32809e-08	0v16
ADD3	0.523517	0.417	0.359	4.88396e-08	0v16
NSD3	0.543848	0.272	0.179	8.06276e-08	0v16
SON	0.395085	0.59	0.593	8.82848e-08	0v16
ENSSSCG00000001398	0.364051	0.538	0.501	1.28323e-07	0v16
SETX	0.493	0.264	0.168	1.31739e-07	0v16
EPB41	0.55339	0.286	0.197	1.39779e-07	0v16
ENSSSCG00000022912	0.546464	0.396	0.339	2.17594e-07	0v16
ENSSSCG00000039658	0.545732	0.233	0.144	7.78937e-07	0v16
HMOX2	0.583877	0.286	0.21	2.05255e-06	0v16
NDFIP1	0.516644	0.279	0.197	3.80715e-06	0v16
CD69	0.58794	0.311	0.236	3.8126e-06	0v16
NDFIP2	0.577559	0.233	0.155	6.80641e-06	0v16
CGGBP1	0.494016	0.326	0.256	7.27093e-06	0v16
RAP1B	0.43749	0.523	0.521	1.59459e-05	0v16
BZW1	0.47586	0.5	0.501	1.82037e-05	0v16
SAMHD1	0.482917	0.215	0.14	9.62803e-05	0v16
HMGN3	0.432915	0.497	0.507	9.77279e-05	0v16
STK4	0.510135	0.334	0.28	0.000133295	0v16
RASSF5	0.460455	0.201	0.126	0.00014026	0v16
APBB1IP	0.507771	0.307	0.244	0.000161362	0v16
SF3B1	0.443774	0.457	0.439	0.000199768	0v16
ENSSSCG00000006919	0.50105	0.237	0.166	0.000240431	0v16
RESF1	0.476935	0.27	0.2	0.00029205	0v16
ZC3HAV1	0.531487	0.263	0.199	0.000305927	0v16
ANKRD12	0.417326	0.414	0.376	0.000462663	0v16
SIGIRR	0.444103	0.208	0.139	0.000693891	0v16
DNAJA1	0.405495	0.461	0.452	0.000781855	0v16
PIK3R1	0.458854	0.227	0.155	0.00100584	0v16
TRMT112	0.36122	0.467	0.461	0.00351212	0v16
CLINT1	0.486032	0.221	0.16	0.00360583	0v16
SASH3	0.408835	0.322	0.267	0.00386585	0v16
PNRC2	0.401778	0.459	0.469	0.0259898	0v16
IFI44L	0.431977	0.311	0.269	0.0274305	0v16
RASSF1	0.395055	0.212	0.153	0.0354568	0v16
CCND3	0.430816	0.367	0.349	0.0384904	0v16
CCR7	2.04225	0.758	0.035	1.85232e-216	0v17
ENSSSCG00000034617	0.540979	1	0.999	7.35159e-208	0v17
ENSSSCG00000003042	0.515976	1	1	3.08421e-193	0v17
RPS27	0.486071	1	1	7.06176e-186	0v17
RPS3A	0.521013	1	1	4.88883e-173	0v17
EVL	1.56857	0.758	0.177	1.07052e-172	0v17
PLAC8	0.903624	0.966	0.799	5.96444e-145	0v17
RPL34	0.447226	1	1	6.68936e-143	0v17
RPS15	0.405452	1	1	6.6193e-132	0v17
RPL6	0.464796	1	0.995	2.04695e-131	0v17
ENSSSCG00000035768	0.384574	1	0.999	5.2217e-130	0v17
ENSSSCG00000031088	0.355695	1	1	4.29425e-122	0v17
RPL35	0.374817	1	0.999	1.2299e-117	0v17
RPL9	0.390371	1	0.996	4.43431e-113	0v17
ENSSSCG00000040273	0.344305	1	1	9.0354e-104	0v17
LEF1	1.3763	0.531	0.102	6.51511e-96	0v17
RPS16	0.336896	1	1	1.23106e-89	0v17
RPL11	0.305089	1	1	2.48299e-89	0v17
RPL37	0.304542	1	1	2.6739e-89	0v17
ENSSSCG00000025928	0.370284	0.997	0.99	2.77362e-86	0v17
ENSSSCG00000011272	0.332622	0.999	1	2.00942e-84	0v17
RPS6	0.399568	0.998	0.994	1.11529e-83	0v17
IFITM3	0.87786	0.806	0.569	1.45878e-83	0v17
ENSSSCG00000038507	0.368151	0.999	1	4.36165e-82	0v17
DDX5	0.727673	0.887	0.713	1.48859e-79	0v17
ENSSSCG00000013597	0.349156	0.996	0.997	7.05686e-70	0v17
RPS9	0.314349	0.999	0.999	1.72005e-69	0v17
RPL7	0.350757	0.999	0.997	4.54892e-69	0v17
ENSSSCG00000039544	0.298909	0.998	0.999	6.3532e-68	0v17
CD5	1.06201	0.48	0.116	1.98076e-67	0v17
HSD11B1L	0.28923	0.999	0.997	6.79874e-67	0v17
RPS18	0.307876	1	0.999	2.27872e-63	0v17
RPL23	0.264292	1	0.999	9.40585e-61	0v17
ENSSSCG00000014855	0.257044	0.997	0.999	2.67793e-60	0v17
FTL	0.5368	0.915	0.776	2.52393e-59	0v17
RPL22	0.365597	0.979	0.981	3.68533e-59	0v17
TCF7	0.870589	0.546	0.22	7.02707e-59	0v17
BTG1	0.517486	0.921	0.842	3.11685e-58	0v17
PDK1	1.01056	0.344	0.037	5.10288e-57	0v17
RPL5	0.470285	0.935	0.898	2.42773e-56	0v17
TMEM123	0.794236	0.643	0.361	3.71647e-55	0v17
RPS14	0.298425	0.999	0.996	3.89423e-55	0v17
RGS10	0.980189	0.342	0.05	1.63502e-52	0v17
RPL39	0.258802	0.999	1	2.24266e-52	0v17
SELL	0.7555	0.557	0.249	2.25345e-47	0v17
FADS3	0.891955	0.267	0.014	7.61198e-47	0v17
ENSSSCG00000013064	0.362709	0.961	0.942	1.03941e-46	0v17
LTB	0.49248	0.678	0.371	2.6994e-46	0v17
CTSC	0.715527	0.715	0.526	4.91608e-45	0v17
SOD1	0.725052	0.617	0.375	2.62107e-44	0v17
PABPC1	0.488013	0.861	0.763	3.09759e-44	0v17
ENSSSCG00000026140	0.895831	0.441	0.17	1.06793e-41	0v17
IL7R	0.862309	0.327	0.064	1.90466e-41	0v17
RPS23	0.313809	0.989	0.988	4.99416e-40	0v17
STMN1	0.821198	0.554	0.31	1.66411e-39	0v17
PTMA	0.267411	0.999	0.996	8.26757e-37	0v17
RCAN3	0.846978	0.377	0.13	9.37227e-37	0v17
CD4	0.800558	0.212	0.008	1.8252e-36	0v17
ENSSSCG00000004945	0.340406	0.937	0.91	5.94765e-35	0v17
ENSSSCG00000006418	0.662445	0.592	0.389	1.50966e-34	0v17
EEF1B2	0.330944	0.958	0.96	2.15675e-34	0v17
ENSSSCG00000024974	0.265596	0.986	0.982	7.27864e-34	0v17
RPS13	0.296928	0.964	0.978	2.03806e-32	0v17
DAPL1	0.728995	0.344	0.113	4.42725e-32	0v17
CD69	0.892951	0.311	0.099	1.7666e-30	0v17
ABLIM1	0.689008	0.51	0.307	5.44302e-30	0v17
S1PR1	0.643266	0.424	0.212	1.70936e-27	0v17
CHD3	0.693657	0.411	0.201	2.92468e-27	0v17
ENSSSCG00000033733	0.564385	0.541	0.344	4.7396e-26	0v17
LAT	0.674994	0.438	0.246	2.02558e-25	0v17
LMO4	0.719594	0.229	0.055	3.38384e-24	0v17
ENSSSCG00000033500	0.298608	0.939	0.91	6.37602e-23	0v17
EMP3	0.487114	0.646	0.514	6.58425e-23	0v17
IL6R	0.660571	0.2	0.044	1.21042e-20	0v17
MNDA	0.644103	0.21	0.054	2.19002e-20	0v17
ATRX	0.512561	0.51	0.36	2.66592e-17	0v17
ENSSSCG00000000576	0.366184	0.841	0.797	4.39189e-17	0v17
SSR4	0.348018	0.729	0.676	8.70648e-16	0v17
CD3G	0.339034	0.791	0.653	9.77336e-16	0v17
ENSSSCG00000004145	0.475457	0.618	0.513	1.03892e-15	0v17
MAP3K1	0.587458	0.299	0.149	7.88462e-15	0v17
CD3E	0.304353	0.742	0.611	1.11586e-14	0v17
ENSSSCG00000039658	0.593584	0.233	0.094	1.67022e-14	0v17
GSTA4	0.555114	0.21	0.076	1.78909e-14	0v17
EIF4A2	0.294589	0.811	0.792	9.27733e-14	0v17
MALT1	0.531618	0.224	0.087	9.92367e-14	0v17
PNRC1	0.393073	0.587	0.486	1.0713e-12	0v17
SIT1	0.439725	0.453	0.317	2.4594e-12	0v17
SPTBN1	0.507529	0.251	0.121	6.9128e-12	0v17
ENSSSCG00000027675	0.571521	0.248	0.121	1.37977e-11	0v17
FYB1	0.468273	0.468	0.36	1.56358e-11	0v17
ENSSSCG00000012178	0.513567	0.351	0.212	2.16257e-11	0v17
SMC4	0.600877	0.394	0.278	3.01169e-11	0v17
ARHGAP15	0.490062	0.429	0.31	4.85207e-11	0v17
TBC1D20	0.484893	0.234	0.112	9.32468e-11	0v17
HSPE1	0.392007	0.655	0.647	2.19551e-10	0v17
BTG2	0.467556	0.27	0.145	6.45194e-10	0v17
COX7A2L	0.277897	0.776	0.733	1.78013e-09	0v17
FGD3	0.467983	0.243	0.126	3.09601e-09	0v17
CD2	0.28593	0.706	0.671	3.56026e-08	0v17
ENSSSCG00000039581	0.476776	0.322	0.206	1.18708e-07	0v17
RASGRP2	0.48208	0.309	0.202	1.58567e-07	0v17
UBL3	0.453849	0.281	0.179	4.27745e-07	0v17
COX17	0.327294	0.519	0.461	3.48994e-06	0v17
TSC22D3	0.413447	0.275	0.171	3.68678e-06	0v17
PDCD4	0.471197	0.24	0.147	7.00656e-06	0v17
PTP4A2	0.341954	0.54	0.47	7.13002e-06	0v17
PPP1CC	0.426996	0.473	0.413	1.05804e-05	0v17
ENSSSCG00000016758	0.35049	0.542	0.481	1.08465e-05	0v17
LNPEP	0.422013	0.298	0.199	1.1371e-05	0v17
DNAJA1	0.35557	0.461	0.378	1.26161e-05	0v17
PSIP1	0.365661	0.519	0.459	2.02967e-05	0v17
HNRNPDL	0.354196	0.596	0.55	2.28998e-05	0v17
RPL10A	0.358166	0.548	0.472	3.5644e-05	0v17
CACYBP	0.405619	0.352	0.272	4.65868e-05	0v17
ZC3HAV1	0.400759	0.263	0.172	5.22284e-05	0v17
RNF149	0.397887	0.23	0.141	6.0965e-05	0v17
RGCC	0.391116	0.266	0.176	9.47525e-05	0v17
CD3D	0.372064	0.403	0.319	0.000103851	0v17
CD247	0.274293	0.586	0.54	0.000119606	0v17
ABI1	0.45586	0.233	0.149	0.00013623	0v17
SRSF2	0.325897	0.591	0.557	0.000367041	0v17
CEBPB	0.369046	0.203	0.12	0.000721836	0v17
HMGN3	0.315188	0.497	0.438	0.000800486	0v17
FKBP11	0.304795	0.473	0.405	0.000920346	0v17
TNRC6B	0.415641	0.259	0.18	0.000980369	0v17
2020-09-06	0.322213	0.507	0.465	0.00138628	0v17
NUCKS1	0.356528	0.433	0.373	0.00150161	0v17
TRMT112	0.299684	0.467	0.407	0.00221159	0v17
ENSSSCG00000038711	0.321345	0.41	0.343	0.00374646	0v17
ARL6IP5	0.358298	0.406	0.343	0.00395425	0v17
SCML4	0.342472	0.269	0.193	0.00999059	0v17
TLE5	0.28008	0.44	0.378	0.0196564	0v17
MRPS15	0.315163	0.254	0.186	0.0441272	0v17
RPS27	1.04681	1	1	0	0v18
RPL34	1.00349	1	0.999	0	0v18
ENSSSCG00000003042	0.84605	1	0.999	0	0v18
ENSSSCG00000034617	0.836099	1	0.999	0	0v18
RPS3A	0.811714	1	1	8.37476e-298	0v18
ENSSSCG00000040273	0.821719	1	1	2.71405e-297	0v18
RPL11	0.774966	1	0.999	2.95111e-286	0v18
RPL37	0.738437	1	0.999	1.98478e-278	0v18
PLAC8	1.93272	0.966	0.685	2.43307e-276	0v18
RPL23	0.781134	1	0.996	1.69799e-273	0v18
RPS15	0.669912	1	1	4.06215e-268	0v18
ENSSSCG00000031088	0.619779	1	0.999	8.43108e-260	0v18
RPL9	0.724263	1	0.996	4.97691e-258	0v18
RPL35	0.7148	1	1	6.59556e-251	0v18
HSD11B1L	0.708004	0.999	0.999	2.13838e-243	0v18
RPS14	0.828235	0.999	0.996	1.15029e-238	0v18
ENSSSCG00000013597	0.800611	0.996	0.991	3.01071e-230	0v18
ENSSSCG00000003930	0.530587	1	0.999	1.08641e-228	0v18
ENSSSCG00000038507	0.724931	0.999	0.996	8.91339e-228	0v18
ENSSSCG00000011272	0.689194	0.999	0.997	8.04189e-227	0v18
RPS9	0.663388	0.999	0.997	7.93121e-223	0v18
ENSSSCG00000035768	0.567599	1	0.999	2.37698e-220	0v18
BTG1	1.52999	0.921	0.691	5.5017e-220	0v18
CCR7	2.16673	0.758	0.011	5.30759e-217	0v18
ENSSSCG00000035080	0.57822	1	1	3.24071e-208	0v18
RPL6	0.575875	1	0.997	6.41464e-196	0v18
RPS16	0.585737	1	0.999	1.76883e-195	0v18
ENSSSCG00000035811	0.488955	1	0.999	7.02463e-190	0v18
ENSSSCG00000039544	0.598541	0.998	0.996	1.13396e-189	0v18
ENSSSCG00000025928	0.623603	0.997	0.993	4.58925e-189	0v18
EVL	1.91851	0.758	0.164	1.3005e-188	0v18
ENSSSCG00000036296	0.504974	0.999	0.999	1.48746e-185	0v18
ENSSSCG00000034448	0.522952	1	0.999	2.04287e-181	0v18
ENSSSCG00000014855	0.550475	0.997	0.999	1.37522e-177	0v18
DDX5	1.22275	0.887	0.776	2.23658e-160	0v18
ENSSSCG00000017239	0.525445	0.996	0.999	7.31619e-147	0v18
RPL22	0.634597	0.979	0.973	9.67275e-141	0v18
KXD1	0.428453	0.999	0.999	6.22146e-130	0v18
RPL39	0.426236	0.999	0.999	1.77004e-129	0v18
ENSSSCG00000004970	0.328645	1	1	4.07668e-128	0v18
ENSSSCG00000039740	0.397767	0.998	0.999	1.05862e-115	0v18
ENSSSCG00000014569	0.337269	1	1	1.19024e-115	0v18
TMEM123	1.50038	0.643	0.247	2.9924e-113	0v18
ENSSSCG00000020830	0.521269	0.986	0.993	6.92526e-113	0v18
SELL	1.56369	0.557	0.078	3.64263e-112	0v18
EEF1B2	0.667653	0.958	0.974	2.56336e-110	0v18
ENSSSCG00000008170	0.458781	0.992	0.999	1.2833e-108	0v18
LEF1	1.61124	0.531	0.066	2.766e-108	0v18
TCF7	1.46107	0.546	0.089	6.89474e-107	0v18
RPS5	0.397564	0.996	0.997	5.02297e-102	0v18
RPL7	0.432816	0.999	0.997	6.80701e-101	0v18
IFITM3	1.10066	0.806	0.691	1.82218e-98	0v18
RPL26	0.336905	1	0.999	4.01501e-95	0v18
ENSSSCG00000013064	0.542038	0.961	0.973	8.3454e-95	0v18
RPS26	0.328057	1	1	1.56036e-94	0v18
RPL3	0.425524	0.992	0.993	1.45494e-92	0v18
ENSSSCG00000004489	0.372805	0.999	0.999	5.1458e-92	0v18
RPS6	0.405478	0.998	0.999	3.96445e-91	0v18
RPL17-C18orf32	0.407032	0.997	0.993	9.24789e-91	0v18
ENSSSCG00000029830	0.326274	0.999	0.997	7.53716e-90	0v18
RPS20	0.294391	1	1	1.15282e-88	0v18
RPL10	0.327028	1	1	2.78342e-83	0v18
RPS11	0.322618	0.999	0.999	9.23021e-82	0v18
LTB	1.11368	0.678	0.4	4.00015e-80	0v18
RPL5	0.588157	0.935	0.947	4.4048e-79	0v18
RPLP0	0.305581	1	0.999	5.39316e-78	0v18
RPS18	0.336786	1	0.999	6.61455e-78	0v18
PABPC1	0.7041	0.861	0.885	8.07639e-77	0v18
ENSSSCG00000037030	0.373117	0.988	0.992	3.04587e-74	0v18
ENSSSCG00000013889	0.291866	0.999	0.999	3.95525e-66	0v18
TRAT1	0.922642	0.712	0.605	1.41006e-65	0v18
IL7R	1.1922	0.327	0.005	3.50427e-63	0v18
ENSSSCG00000033500	0.528461	0.939	0.962	5.49026e-62	0v18
CTSC	0.949372	0.715	0.677	2.35455e-59	0v18
PDK1	1.13443	0.344	0.034	1.41242e-58	0v18
EIF4A2	0.676936	0.811	0.855	6.17017e-57	0v18
ENSSSCG00000026140	1.22503	0.441	0.147	1.51577e-55	0v18
ENSSSCG00000024974	0.312069	0.986	0.996	7.57653e-50	0v18
RPL7A	0.251727	0.995	0.997	1.82031e-46	0v18
PNRC1	0.936081	0.587	0.454	5.71656e-44	0v18
FADS3	0.901272	0.267	0.019	1.9152e-43	0v18
ENSSSCG00000011952	0.301729	0.978	0.985	1.46365e-41	0v18
COX7A2L	0.584952	0.776	0.85	2.20863e-41	0v18
RGS10	1.02313	0.342	0.096	3.83776e-41	0v18
S1PR1	1.01613	0.424	0.193	7.65971e-41	0v18
RPS13	0.332841	0.964	0.988	1.31447e-40	0v18
FTL	0.420853	0.915	0.931	1.82168e-40	0v18
DAPL1	0.986622	0.344	0.099	6.48874e-40	0v18
CD69	1.15091	0.311	0.07	1.05598e-39	0v18
CD5	0.990388	0.48	0.264	1.60915e-39	0v18
ABLIM1	1.00243	0.51	0.354	4.65912e-38	0v18
ENSSSCG00000009303	0.251352	0.993	0.996	1.17489e-37	0v18
ENSSSCG00000036716	0.251123	0.989	0.999	1.73397e-37	0v18
ENSSSCG00000037885	0.63058	0.853	0.873	2.27703e-37	0v18
RPS23	0.286188	0.989	1	7.15192e-34	0v18
ZFP36L2	0.800861	0.653	0.614	3.11849e-32	0v18
IL6R	0.826521	0.2	0.011	2.8179e-31	0v18
UBB	0.336801	0.967	0.978	1.09271e-30	0v18
RCAN3	0.983122	0.377	0.182	1.15975e-30	0v18
CD4	0.743756	0.212	0.018	1.20993e-30	0v18
CD2	0.597894	0.706	0.786	3.86786e-29	0v18
ENSSSCG00000027573	0.268328	0.965	0.991	5.57284e-28	0v18
ENSSSCG00000039046	0.276158	0.972	0.985	6.82782e-28	0v18
ENSSSCG00000006081	0.345422	0.894	0.968	8.32858e-28	0v18
TPT1	0.373249	0.996	1	6.41803e-27	0v18
CD52	0.387379	0.945	0.954	4.70591e-26	0v18
ENSSSCG00000006418	0.672235	0.592	0.543	3.33931e-25	0v18
SOD1	0.682169	0.617	0.627	5.30846e-25	0v18
ENSSSCG00000033734	0.298886	0.754	0.382	1.90927e-24	0v18
ARHGAP15	0.866796	0.429	0.292	1.13748e-23	0v18
BTG2	0.810553	0.27	0.099	1.53632e-22	0v18
EEF2	0.342855	0.908	0.957	1.58411e-22	0v18
SCML4	0.789377	0.269	0.103	1.72887e-21	0v18
MNDA	0.704074	0.21	0.049	1.93566e-21	0v18
ENSSSCG00000004945	0.258259	0.937	0.981	3.09998e-20	0v18
ATRX	0.779512	0.51	0.466	4.80456e-20	0v18
ENSSSCG00000000576	0.404823	0.841	0.897	1.25941e-19	0v18
EIF3K	0.338641	0.806	0.942	1.37662e-19	0v18
PNISR	0.722194	0.567	0.585	2.24513e-19	0v18
SIT1	0.709899	0.453	0.339	9.17528e-19	0v18
ENSSSCG00000012178	0.792291	0.351	0.203	5.15222e-18	0v18
ENSSSCG00000023792	0.812739	0.311	0.169	5.54021e-18	0v18
CHD3	0.794358	0.411	0.303	1.30424e-17	0v18
ENSSSCG00000004145	0.622029	0.618	0.68	1.57627e-17	0v18
CD37	0.715865	0.486	0.434	7.29924e-17	0v18
ENSSSCG00000001063	0.691223	0.209	0.072	7.19422e-16	0v18
PDCD4	0.757299	0.24	0.108	1.17026e-14	0v18
ENSSSCG00000027675	0.774152	0.248	0.119	4.20798e-14	0v18
LMO4	0.724792	0.229	0.103	1.54771e-13	0v18
MALT1	0.690851	0.224	0.097	1.70316e-13	0v18
EMP3	0.486354	0.646	0.738	3.34283e-13	0v18
CAMK4	0.764163	0.321	0.214	3.37213e-13	0v18
SKAP1	0.671217	0.493	0.485	1.51642e-12	0v18
MAP3K1	0.835032	0.299	0.188	2.10408e-12	0v18
TSC22D3	0.73277	0.275	0.155	5.36983e-12	0v18
ENSSSCG00000014540	0.341004	0.875	0.951	2.41972e-11	0v18
ARL6IP5	0.733266	0.406	0.355	5.40036e-11	0v18
ENSSSCG00000039658	0.698626	0.233	0.123	1.47843e-10	0v18
GSTA4	0.636418	0.21	0.1	1.65811e-10	0v18
LAT	0.666577	0.438	0.4	3.2752e-10	0v18
LNPEP	0.719996	0.298	0.204	1.10892e-09	0v18
SRGN	0.443753	0.687	0.811	7.21321e-09	0v18
RPL36AL	0.276926	0.817	0.93	8.36716e-09	0v18
SSR2	0.272003	0.81	0.95	1.84983e-08	0v18
H3F3B	0.394858	0.917	0.988	7.78716e-08	0v18
ENSSSCG00000016758	0.562731	0.542	0.631	1.93734e-07	0v18
FGD3	0.614442	0.243	0.153	2.63866e-07	0v18
ENSSSCG00000039581	0.794993	0.322	0.25	2.64792e-07	0v18
UBL3	0.645738	0.281	0.205	1.11547e-06	0v18
CD3E	0.269058	0.742	0.814	1.91825e-06	0v18
SSR4	0.281169	0.729	0.885	3.50666e-06	0v18
ATP6V1G1	0.372799	0.666	0.803	7.74913e-06	0v18
ENSSSCG00000038711	0.594985	0.41	0.412	3.63195e-05	0v18
ENSSSCG00000001398	0.486787	0.538	0.616	4.72634e-05	0v18
RNF149	0.558576	0.23	0.155	4.98665e-05	0v18
ENSSSCG00000000071	0.404617	0.607	0.77	0.000121208	0v18
ENSSSCG00000022912	0.606339	0.396	0.388	0.000132998	0v18
RPL10A	0.589771	0.548	0.653	0.000203543	0v18
CDKN1B	0.56873	0.202	0.128	0.00028541	0v18
ABI1	0.643222	0.233	0.168	0.000288807	0v18
TBC1D20	0.555214	0.234	0.166	0.000390555	0v18
CD247	0.442335	0.586	0.732	0.000418521	0v18
FYB1	0.511035	0.468	0.515	0.000509046	0v18
TNRC6B	0.608473	0.259	0.2	0.000597643	0v18
ZC3HAV1	0.569122	0.263	0.204	0.00130295	0v18
ENSSSCG00000035869	0.651236	0.251	0.196	0.00188793	0v18
CD3G	0.251348	0.791	0.896	0.00412584	0v18
NCK1	0.621542	0.22	0.161	0.00447531	0v18
ALG13	0.53427	0.214	0.154	0.00972507	0v18
SRSF5	0.598039	0.461	0.532	0.0388229	0v18
RPS3A	1.32775	1	0.96	0	0v19
RPS16	1.30016	1	0.969	0	0v19
RPL34	1.25667	1	0.957	0	0v19
ENSSSCG00000034617	1.24419	1	0.981	0	0v19
ENSSSCG00000003042	1.16481	1	0.991	0	0v19
RPS27	0.921956	1	1	5.11182e-300	0v19
ENSSSCG00000038507	1.32193	0.999	0.969	9.38621e-299	0v19
ENSSSCG00000003930	1.09223	1	0.973	2.00772e-297	0v19
RPS15	1.12071	1	0.976	1.69999e-295	0v19
ENSSSCG00000031088	1.01159	1	0.979	8.93238e-294	0v19
ENSSSCG00000036296	1.04152	0.999	0.966	3.66963e-293	0v19
RPL9	1.11543	1	0.967	1.79964e-292	0v19
RPL35	1.11983	1	0.967	8.92073e-292	0v19
ENSSSCG00000035080	1.00483	1	0.99	1.77294e-290	0v19
RPS18	1.18236	1	0.94	2.96079e-289	0v19
ENSSSCG00000035768	1.00159	1	0.996	1.32989e-287	0v19
ENSSSCG00000034448	0.991248	1	0.994	1.91144e-278	0v19
HSD11B1L	0.999206	0.999	0.976	1.70919e-277	0v19
RPL23	0.864518	1	0.99	1.59268e-268	0v19
RPL6	1.0327	1	0.95	1.70747e-265	0v19
ENSSSCG00000033721	2.52347	0.884	0.069	7.40407e-260	0v19
ENSSSCG00000014569	0.842236	1	0.983	2.03694e-254	0v19
RPS26	0.887927	1	0.989	4.97149e-249	0v19
ENSSSCG00000035811	0.754809	1	0.989	1.5672e-245	0v19
ENSSSCG00000037885	2.74506	0.853	0.071	2.84561e-243	0v19
ENSSSCG00000011272	0.860814	0.999	0.979	3.56702e-241	0v19
RPL3	1.15874	0.992	0.861	7.1981e-241	0v19
ENSSSCG00000040273	0.712068	1	0.997	1.55183e-237	0v19
ENSSSCG00000039544	0.887492	0.998	0.964	3.60804e-237	0v19
RPS6	0.997352	0.998	0.931	1.33971e-236	0v19
ENSSSCG00000014855	0.91865	0.997	0.989	2.17882e-236	0v19
RPL37	0.734617	1	0.994	1.18078e-235	0v19
ENSSSCG00000025928	0.915227	0.997	0.947	3.10072e-235	0v19
RPL11	0.804358	1	0.983	3.44035e-234	0v19
RPL7	1.01737	0.999	0.926	4.64675e-231	0v19
RPL22	1.17895	0.979	0.821	1.8809e-230	0v19
ENSSSCG00000008170	0.993078	0.992	0.917	1.1853e-224	0v19
RPS20	0.70476	1	0.997	3.11593e-224	0v19
ENSSSCG00000033697	1.21191	0.983	0.817	2.79214e-221	0v19
ENSSSCG00000029830	0.726171	0.999	0.991	3.48276e-214	0v19
CD3G	2.11576	0.791	0.061	4.45449e-210	0v19
RPL17-C18orf32	0.888591	0.997	0.949	4.93334e-208	0v19
ENSSSCG00000024974	0.998966	0.986	0.929	4.05022e-207	0v19
CCR7	2.13493	0.758	0.021	1.98968e-204	0v19
RPLP2	0.919596	0.995	0.941	2.5276e-204	0v19
RPS5	0.808244	0.996	0.96	1.51483e-201	0v19
RPL7A	0.815587	0.995	0.95	2.44609e-200	0v19
RPS9	0.691223	0.999	0.99	6.06138e-192	0v19
CD3E	1.99776	0.742	0.047	6.22694e-191	0v19
ENSSSCG00000039046	0.962519	0.972	0.819	2.79554e-181	0v19
RPS11	0.660169	0.999	0.997	5.0991e-180	0v19
TRAT1	1.97993	0.712	0.043	4.83092e-177	0v19
ENSSSCG00000009303	0.761917	0.993	0.957	1.50257e-175	0v19
ENSSSCG00000017239	0.690422	0.996	0.98	2.93141e-173	0v19
RPL5	1.15534	0.935	0.694	4.45964e-172	0v19
LTB	1.94331	0.678	0.036	2.29402e-163	0v19
ENSSSCG00000033019	0.874639	0.966	0.869	1.15246e-160	0v19
ENSSSCG00000004970	0.513577	1	0.996	1.97582e-160	0v19
RPSA	0.683068	0.995	0.967	1.77748e-159	0v19
CTSW	1.83438	0.689	0.071	1.50856e-157	0v19
ENSSSCG00000013064	0.872559	0.961	0.843	2.46387e-157	0v19
RPS14	0.679397	0.999	0.964	1.65714e-154	0v19
ENSSSCG00000013597	0.630365	0.996	0.977	1.37558e-153	0v19
CD2	1.66804	0.706	0.127	8.85839e-152	0v19
TMEM123	1.80242	0.643	0.04	4.72409e-149	0v19
ENSSSCG00000033500	0.995394	0.939	0.731	3.01128e-148	0v19
ENSSSCG00000017509	0.634699	0.993	0.984	1.27989e-147	0v19
ENSSSCG00000011952	0.730918	0.978	0.934	1.79501e-145	0v19
ENSSSCG00000036716	0.647702	0.989	0.98	4.06497e-142	0v19
ETS1	1.79448	0.614	0.029	3.10368e-140	0v19
RPS12	0.595769	0.998	0.99	1.92848e-138	0v19
RPL39	0.535008	0.999	0.994	5.05574e-138	0v19
RPS23	0.721075	0.989	0.967	1.57335e-137	0v19
ENSSSCG00000004489	0.534715	0.999	0.997	1.03181e-136	0v19
2020-09-01	1.6442	0.591	0.026	7.99116e-132	0v19
ENSSSCG00000013889	0.502656	0.999	0.996	8.37209e-132	0v19
RPS4X	0.657876	0.996	0.923	1.30361e-130	0v19
CD247	1.6992	0.586	0.039	5.15833e-128	0v19
LCK	1.62683	0.571	0.019	5.26173e-128	0v19
RPS21	0.738508	0.953	0.894	5.21538e-126	0v19
RPS17	0.545799	0.997	0.99	5.59552e-121	0v19
ENSSSCG00000020830	0.592924	0.986	0.967	1.97809e-119	0v19
SOD1	1.52066	0.617	0.129	2.09902e-116	0v19
ENSSSCG00000027573	0.683526	0.965	0.949	3.44244e-116	0v19
KXD1	0.47459	0.999	0.991	9.56844e-116	0v19
STMN1	1.72508	0.554	0.037	1.92159e-115	0v19
LEF1	1.67187	0.531	0.02	1.03739e-114	0v19
TCF7	1.51779	0.546	0.041	1.14634e-112	0v19
ENSSSCG00000033733	1.51748	0.541	0.054	1.00386e-107	0v19
ENSSSCG00000004945	0.696463	0.937	0.851	9.28356e-107	0v19
ABLIM1	1.53407	0.51	0.026	2.0092e-105	0v19
EVL	1.03132	0.758	0.48	4.17466e-99	0v19
SKAP1	1.46728	0.493	0.03	8.36777e-99	0v19
RPS13	0.612825	0.964	0.957	4.07362e-98	0v19
CD5	1.49383	0.48	0.033	7.16158e-94	0v19
ARHGDIB	0.66693	0.935	0.891	1.69426e-90	0v19
ENSSSCG00000026140	1.50756	0.441	0.007	6.6264e-90	0v19
ENSSSCG00000006081	0.716506	0.894	0.849	9.38636e-89	0v19
ENSSSCG00000039460	0.491354	0.992	0.964	9.72896e-88	0v19
SIT1	1.36304	0.453	0.026	1.95459e-87	0v19
ENSSSCG00000037030	0.44852	0.988	0.981	3.53607e-81	0v19
PSIP1	1.2903	0.519	0.119	3.80413e-81	0v19
NPM1	0.81829	0.824	0.626	4.72373e-80	0v19
S1PR1	1.31531	0.424	0.023	5.02398e-80	0v19
LIMD2	1.00682	0.695	0.394	9.59332e-77	0v19
CD3D	1.25242	0.403	0.03	1.37435e-71	0v19
RPS10-NUDT3	0.592329	0.906	0.857	7.85053e-71	0v19
GNG2	1.22716	0.434	0.061	3.12063e-70	0v19
2020-09-06	1.16877	0.507	0.151	9.65084e-69	0v19
SSR4	0.840827	0.729	0.49	4.94521e-68	0v19
ENSSSCG00000016737	0.560168	0.949	0.867	6.21686e-67	0v19
RPLP0	0.330116	1	0.994	5.20722e-66	0v19
RACK1	0.559669	0.924	0.906	1.65488e-65	0v19
RAC2	0.613065	0.865	0.821	1.88298e-64	0v19
ACTG1	0.819332	0.831	0.749	3.47857e-64	0v19
RCAN3	1.20255	0.377	0.036	1.23104e-62	0v19
DAPL1	1.16677	0.344	0.011	2.00255e-62	0v19
IL7R	1.18446	0.327	0.003	2.14447e-60	0v19
ENSSSCG00000039740	0.301789	0.998	0.996	1.53057e-57	0v19
CHD3	1.11091	0.411	0.081	1.54365e-57	0v19
ATRX	1.02383	0.51	0.197	2.45936e-56	0v19
CD69	1.24281	0.311	0.009	7.78858e-55	0v19
CAMK4	1.05789	0.321	0.017	3.25227e-54	0v19
ENSSSCG00000039581	1.25689	0.322	0.023	5.90662e-53	0v19
LAT	1.08245	0.438	0.136	9.39429e-53	0v19
ARL6IP5	1.06012	0.406	0.097	1.43245e-52	0v19
TLE5	1.01968	0.44	0.136	2.0243e-52	0v19
PDK1	1.05357	0.344	0.04	4.36545e-52	0v19
GPR174	1.04539	0.306	0.02	4.7453e-50	0v19
SMC4	1.12445	0.394	0.093	8.23116e-50	0v19
ENSSSCG00000001398	0.89543	0.538	0.279	1.80578e-46	0v19
PVRIG	0.924754	0.283	0.014	1.82354e-46	0v19
ADD3	0.912012	0.417	0.124	3.80497e-45	0v19
EEF1D	0.691362	0.701	0.573	1.20166e-44	0v19
SCML4	0.961503	0.269	0.013	9.80344e-44	0v19
HSPE1	0.791273	0.655	0.493	1.35098e-43	0v19
EEF1B2	0.380764	0.958	0.931	8.48547e-40	0v19
TRAF3IP3	0.760615	0.584	0.391	1.7826e-37	0v19
DDX5	0.488259	0.887	0.84	1.70807e-36	0v19
FADS3	0.848916	0.267	0.036	7.35338e-36	0v19
ENSSSCG00000036096	0.795066	0.446	0.194	1.53525e-34	0v19
CD4	0.814487	0.212	0.003	1.98816e-34	0v19
GSTA4	0.791709	0.21	0.004	1.16164e-33	0v19
SPTBN1	0.829815	0.251	0.033	4.03971e-33	0v19
COX7A2L	0.514639	0.776	0.704	1.37296e-32	0v19
GZMB	0.823922	0.253	0.031	1.45448e-32	0v19
SERBP1	0.590261	0.706	0.59	1.88938e-32	0v19
ARL4C	0.767359	0.208	0.009	6.83324e-32	0v19
SRSF2	0.761695	0.591	0.436	3.86838e-30	0v19
CORO1A	0.439146	0.858	0.843	6.22416e-30	0v19
TMA7	0.530583	0.758	0.703	8.18019e-30	0v19
EIF3K	0.434632	0.806	0.789	5.21564e-29	0v19
UTRN	0.765483	0.285	0.07	9.26188e-29	0v19
DDT	0.785376	0.335	0.121	2.29134e-28	0v19
EIF4A2	0.465183	0.811	0.759	1.25409e-27	0v19
CNN2	0.72275	0.395	0.177	2.21316e-27	0v19
BIN1	0.741413	0.219	0.033	2.06724e-26	0v19
TBC1D10C	0.713468	0.239	0.047	4.63441e-26	0v19
PNRC2	0.754391	0.459	0.279	9.85506e-26	0v19
ENSSSCG00000007188	0.666382	0.563	0.416	1.11744e-25	0v19
ENSSSCG00000028485	0.427006	0.816	0.777	2.87698e-25	0v19
RASGRP1	0.750924	0.218	0.037	8.57892e-25	0v19
ENSSSCG00000009327	0.548069	0.696	0.603	8.99173e-25	0v19
2020-09-07	0.672282	0.527	0.37	1.00815e-23	0v19
SNRPN	0.734293	0.217	0.041	1.47983e-23	0v19
ENSSSCG00000001097	0.735643	0.4	0.213	3.34913e-23	0v19
EPB41	0.726962	0.286	0.097	6.89274e-23	0v19
PPP1CC	0.74089	0.473	0.316	1.44504e-22	0v19
RASGRP2	0.772771	0.309	0.13	1.39021e-21	0v19
MIF	0.474322	0.739	0.709	2.26453e-21	0v19
LNPEP	0.739714	0.298	0.119	7.42489e-21	0v19
NUCKS1	0.707535	0.433	0.267	7.56926e-21	0v19
BTG1	0.323056	0.921	0.91	1.17034e-20	0v19
HMOX2	0.743679	0.286	0.113	2.98307e-20	0v19
HSP90AB1	0.521404	0.704	0.689	8.82877e-20	0v19
RPL27	0.262772	0.922	0.934	1.59469e-19	0v19
FBL	0.638517	0.217	0.057	1.79998e-19	0v19
ENSSSCG00000014343	0.667336	0.4	0.23	3.86798e-19	0v19
S100A13	0.699275	0.289	0.12	9.2132e-19	0v19
SIGIRR	0.640202	0.208	0.054	1.56052e-18	0v19
ENSSSCG00000005656	0.526625	0.578	0.476	8.15379e-18	0v19
NME1	0.626022	0.205	0.056	1.49016e-17	0v19
HNRNPDL	0.596617	0.596	0.513	2.29001e-17	0v19
STK26	0.636708	0.23	0.074	3.15155e-17	0v19
PRKACB	0.67757	0.287	0.13	5.99661e-17	0v19
KLF2	0.504418	0.554	0.429	1.14266e-16	0v19
NAP1L1	0.536815	0.55	0.427	1.18138e-16	0v19
NOP53	0.512241	0.556	0.449	4.493e-16	0v19
STK38	0.615731	0.247	0.094	5.92134e-16	0v19
PNISR	0.542216	0.567	0.487	1.00428e-15	0v19
STK17B	0.612272	0.357	0.213	9.27797e-14	0v19
MALT1	0.562834	0.224	0.087	6.58365e-13	0v19
ENSSSCG00000036114	0.529774	0.498	0.386	8.2011e-13	0v19
SASH3	0.553208	0.322	0.181	1.33779e-12	0v19
PTPRCAP	0.502997	0.541	0.464	1.52354e-12	0v19
ENSSSCG00000000071	0.445378	0.607	0.561	1.58719e-12	0v19
ENSSSCG00000000576	0.330882	0.841	0.871	1.60453e-12	0v19
ARL6IP1	0.601895	0.38	0.253	1.80057e-12	0v19
RGCC	0.519731	0.266	0.121	1.97853e-12	0v19
TBC1D20	0.556204	0.234	0.101	2.86623e-12	0v19
ENSSSCG00000034868	0.569762	0.293	0.157	1.27646e-11	0v19
SNRPE	0.451357	0.536	0.471	1.46511e-11	0v19
EEF2	0.250082	0.908	0.893	1.28571e-10	0v19
HBB	0.846359	0.287	0.141	1.57054e-10	0v19
POLE4	0.524986	0.307	0.181	2.5914e-10	0v19
ENSSSCG00000001063	0.559755	0.209	0.091	5.80206e-10	0v19
PABPC1	0.273294	0.861	0.85	7.64216e-10	0v19
CHRAC1	0.542225	0.334	0.217	7.87151e-10	0v19
ENSSSCG00000039658	0.544905	0.233	0.11	8.54468e-10	0v19
RCN2	0.544248	0.209	0.096	1.24747e-09	0v19
JAK1	0.403444	0.638	0.611	1.41088e-09	0v19
UBL3	0.509555	0.281	0.16	2.03963e-09	0v19
ENSSSCG00000024263	0.544773	0.405	0.294	3.35087e-09	0v19
MBNL1	0.502057	0.517	0.439	4.39531e-09	0v19
GUK1	0.512757	0.278	0.163	7.06571e-09	0v19
REX1BD	0.533294	0.275	0.16	7.91036e-09	0v19
ENSSSCG00000004145	0.374281	0.618	0.549	2.18819e-08	0v19
PNRC1	0.36955	0.587	0.543	2.30142e-08	0v19
ARGLU1	0.492525	0.43	0.35	4.93973e-08	0v19
SRSF10	0.531193	0.347	0.247	7.58188e-08	0v19
ZNF292	0.452483	0.233	0.123	8.79665e-08	0v19
HCST	0.398201	0.51	0.426	1.36505e-07	0v19
RBM38	0.462697	0.219	0.113	1.40532e-07	0v19
SAMHD1	0.488666	0.215	0.111	2.61543e-07	0v19
ENSSSCG00000017213	0.417835	0.523	0.476	2.61787e-07	0v19
ENSSSCG00000007978	0.550776	0.249	0.131	7.14009e-07	0v19
ACP1	0.480998	0.373	0.286	1.15441e-06	0v19
SF3B1	0.456414	0.457	0.386	1.33644e-06	0v19
LCP1	0.405216	0.623	0.607	1.34796e-06	0v19
RBMX	0.501014	0.27	0.171	1.47907e-06	0v19
NOP56	0.483101	0.227	0.129	1.61771e-06	0v19
SMC6	0.485654	0.237	0.139	2.44088e-06	0v19
ZFP36L2	0.435906	0.653	0.641	2.59353e-06	0v19
TNRC6B	0.504441	0.259	0.161	3.31314e-06	0v19
NCL	0.501583	0.286	0.193	6.94519e-06	0v19
TBCA	0.410176	0.45	0.387	7.0828e-06	0v19
HNRNPU	0.438116	0.429	0.35	1.12771e-05	0v19
CRLF3	0.459853	0.349	0.264	1.12905e-05	0v19
FYN	0.460569	0.212	0.123	1.59976e-05	0v19
SRSF5	0.508151	0.461	0.413	1.86536e-05	0v19
ENSSSCG00000022912	0.419938	0.396	0.311	1.92827e-05	0v19
CNBP	0.374007	0.529	0.49	2.08401e-05	0v19
ENSSSCG00000023792	0.455715	0.311	0.223	2.10925e-05	0v19
FGD3	0.455696	0.243	0.15	2.20688e-05	0v19
RASSF5	0.431303	0.201	0.11	3.17116e-05	0v19
SNRK	0.444987	0.21	0.12	4.98641e-05	0v19
CREBZF	0.473526	0.24	0.154	7.76644e-05	0v19
HDAC2	0.456476	0.229	0.143	0.000117408	0v19
TRMT112	0.372116	0.467	0.42	0.000143087	0v19
SUCLG2	0.479882	0.257	0.176	0.000175916	0v19
ENSSSCG00000009851	0.476145	0.259	0.177	0.000285721	0v19
SNRPF	0.402913	0.261	0.179	0.000369292	0v19
COX7B	0.257822	0.784	0.809	0.000374222	0v19
GNAI3	0.475807	0.243	0.164	0.000412896	0v19
ND3	0.345364	0.547	0.519	0.000706813	0v19
MRPS15	0.41332	0.254	0.176	0.000746389	0v19
EIF3E	0.328137	0.56	0.54	0.000821509	0v19
THRAP3	0.435262	0.25	0.173	0.00129202	0v19
NDFIP2	0.483267	0.233	0.161	0.00272424	0v19
SYNCRIP	0.417391	0.218	0.143	0.00273944	0v19
PNN	0.348181	0.418	0.36	0.00332798	0v19
ENSSSCG00000036988	0.408659	0.29	0.22	0.00410856	0v19
ENSSSCG00000006919	0.419356	0.237	0.16	0.00452288	0v19
FUS	0.464946	0.256	0.189	0.00467326	0v19
ENSSSCG00000035048	0.436676	0.203	0.134	0.00490496	0v19
RPL10A	0.317764	0.548	0.491	0.00503104	0v19
ENSSSCG00000005518	0.358144	0.313	0.246	0.0126168	0v19
PRKCSH	0.411636	0.228	0.16	0.013341	0v19
GPX4	0.385383	0.384	0.339	0.0192728	0v19
MEAF6	0.409111	0.205	0.136	0.0215228	0v19
FKBP11	0.323574	0.473	0.433	0.0225258	0v19
SRRM1	0.398477	0.358	0.306	0.0260894	0v19
AKAP9	0.392632	0.26	0.191	0.0267579	0v19
ENSSSCG00000027675	0.424929	0.248	0.18	0.0277819	0v19
PIK3R1	0.41414	0.227	0.159	0.0299679	0v19
UBXN11	0.441423	0.239	0.171	0.0302147	0v19
BPTF	0.370137	0.203	0.133	0.0364323	0v19
CD52	3.13179	0.945	0.109	0	0v2
ENSSSCG00000037885	2.8236	0.853	0.041	0	0v2
ENSSSCG00000033721	2.25875	0.884	0.139	0	0v2
CD3G	2.19053	0.791	0.034	0	0v2
TRAT1	2.05528	0.712	0.014	0	0v2
CD3E	2.04463	0.742	0.03	0	0v2
CCR7	1.96646	0.758	0.054	0	0v2
ENSSSCG00000038507	0.830664	0.999	0.984	0	0v2
ENSSSCG00000034617	0.527562	1	1	0	0v2
CTSW	1.95341	0.689	0.05	4.17852e-291	0v2
RPL23	0.558969	1	0.996	7.88768e-290	0v2
RPL35	0.571659	1	0.994	2.44457e-289	0v2
RPS16	0.62528	1	0.995	4.02193e-289	0v2
RPS15	0.50246	1	1	4.03664e-273	0v2
ENSSSCG00000004970	0.471355	1	1	1.88089e-270	0v2
CD2	1.66395	0.706	0.104	5.88043e-266	0v2
RPS3A	0.477963	1	0.999	1.25218e-248	0v2
ENSSSCG00000014569	0.473814	1	0.999	1.23827e-243	0v2
CD247	1.69431	0.586	0.029	2.1374e-234	0v2
LCK	1.63814	0.571	0.019	2.2101e-233	0v2
ENSSSCG00000039544	0.536944	0.998	0.986	9.3102e-228	0v2
ENSSSCG00000014855	0.535377	0.997	0.986	8.84129e-225	0v2
KXD1	0.532534	0.999	0.98	1.3738e-221	0v2
ENSSSCG00000031088	0.397798	1	1	4.83239e-221	0v2
ENSSSCG00000035768	0.442816	1	0.998	3.81467e-220	0v2
TPT1	0.883332	0.996	0.953	1.06554e-216	0v2
RPLP2	0.618571	0.995	0.957	2.39712e-216	0v2
LEF1	1.68848	0.531	0.011	1.2723e-215	0v2
IFITM3	1.33912	0.806	0.407	4.10434e-210	0v2
TCF7	1.48777	0.546	0.033	2.76188e-204	0v2
SELL	1.54049	0.557	0.048	2.9621e-200	0v2
ENSSSCG00000036296	0.4186	0.999	0.997	4.30458e-199	0v2
RPS27	0.373751	1	1	3.90725e-189	0v2
SKAP1	1.47048	0.493	0.018	3.51901e-187	0v2
FYB1	1.40834	0.468	0.011	2.43087e-179	0v2
RPS18	0.45224	1	0.991	4.50775e-179	0v2
ENSSSCG00000017239	0.489973	0.996	0.977	8.08307e-174	0v2
HSD11B1L	0.420039	0.999	0.996	9.63253e-173	0v2
CTSC	1.23359	0.715	0.272	1.81453e-170	0v2
RPL9	0.390677	1	0.999	2.09672e-170	0v2
CD5	1.39785	0.48	0.044	9.1057e-161	0v2
ENSSSCG00000033697	0.604866	0.983	0.935	1.81707e-160	0v2
ENSSSCG00000040273	0.352532	1	0.999	5.55866e-160	0v2
RPL22	0.54289	0.979	0.932	4.18666e-155	0v2
ENSSSCG00000035080	0.348736	1	1	8.39735e-152	0v2
ENSSSCG00000034448	0.363494	1	1	5.60519e-151	0v2
EVL	0.972022	0.758	0.407	4.08596e-150	0v2
ENSSSCG00000011272	0.387534	0.999	0.992	1.67317e-148	0v2
RPS5	0.426819	0.996	0.987	2.85549e-147	0v2
[truncated: 436,805+ more rows]
