# Supplementary material for: Reference transcriptomes of porcine peripheral immune cells created through bulk and single-cell RNA sequencing
Source: bioRxiv preprint, doi:10.1101/2021.04.02.438107, version 1 (2021-04-04)
Supplement: SuppFile11 [file 438107_file07.xlsx]

## Sheet: PW_Error_Rates_CD4
Supplementary File 11. Random forest pair-wise analyses of CD4+ αβ T-cell clusters. For each model represented below the porcine scRNA-seq cluster IDs compared are shown along with the parameters used and resulting OOB prediction error. Variable importance was assigned by measuring node impurity (Impurity) and using permutations (Permutation). Features that reduced error in predictive accuracy ar…
0 vs 3
Type: Classification
Number of trees: 500
Sample size: 3345
Number of independent variables: 14386
Mtry: 119
Target node size: 1
Variable importance mode: impurity
Splitrule: gini
OOB prediction error: 7.12 %
0 vs 4
Type: Classification
Number of trees: 500
Sample size: 3330
Number of independent variables: 14386
Mtry: 119
Target node size: 1
Variable importance mode: impurity
Splitrule: gini
OOB prediction error: 2.28 %
0 vs 28
Type: Classification
Number of trees: 500
Sample size: 2313
Number of independent variables: 14386
Mtry: 119
Target node size: 1
Variable importance mode: impurity
Splitrule: gini
OOB prediction error: 0.48 %
3 vs 4
Type: Classification
Number of trees: 500
Sample size: 2769
Number of independent variables: 14386
Mtry: 119
Target node size: 1
Variable importance mode: impurity
Splitrule: gini
OOB prediction error: 19.54 %
3 vs 28
Type: Classification
Number of trees: 500
Sample size: 1752
Number of independent variables: 14386
Mtry: 119
Target node size: 1
Variable importance mode: impurity
Splitrule: gini
OOB prediction error: 1.43 %
4 vs 28
Type: Classification
Number of trees: 500
Sample size: 1737
Number of independent variables: 14386
Mtry: 119
Target node size: 1
Variable importance mode: impurity
Splitrule: gini
OOB prediction error: 3.68 %

## Sheet: 0v3_Impurity
Supplementary File 11. Random forest pair-wise analyses of CD4+ αβ T-cell clusters. For each model represented below the porcine scRNA-seq cluster IDs compared are shown along with the parameters used and resulting OOB prediction error. Variable importance was assigned by measuring node impurity (Impurity) and using permutations (Permutation). Features that reduced error in predictive accuracy ar…
Gene	Impurity
ENSSSCG00000036618	40.4823
TMSB10	21.0382
ITGB1	17.7076
S100A6	15.0549
SRGN	14.8893
LTB	14.0662
COX1	13.8634
GPX1	13.8263
S100A4	13.6717
UCP2	12.7286
RPS3A	12.6652
S100A10	12.4955
S100A11	11.662
SAT1	10.8846
RPS16	10.5665
CCR7	9.14548
IL18R1	9.03487
COX2	7.93569
CD74	7.61525
B2M	7.59602
ANXA2	6.97999
ENSSSCG00000006395	6.79667
ENSSSCG00000034617	6.77324
ARHGDIB	6.72261
ENSSSCG00000011272	6.67894
ENSSSCG00000001229	6.51588
ENSSSCG00000026140	6.35807
ENSSSCG00000037142	6.22902
RPL35	6.07897
SELL	5.74651
RPL9	5.68186
ENSSSCG00000003042	5.56877
VMP1	5.11806
ENSSSCG00000040273	5.08623
RPL34	4.94242
CD99	4.83326
ENSSSCG00000035080	4.8157
SAMHD1	4.70961
CTSW	4.60814
PLAC8	4.59657
RPL6	4.53844
RPL23	4.41463
LEF1	4.23668
RPS23	4.21296
SUSD3	4.20717
RPL5	4.14854
BST2	4.08165
ENSSSCG00000039544	4.04268
SH3BGRL3	4.02052
ENSSSCG00000014855	4.00404
CST7	3.93476
CD40LG	3.85227
OSTF1	3.59291
RPL7	3.5572
ATP6	3.55133
MYL6	3.53681
RPS5	3.44476
ENSSSCG00000035768	3.36633
ID2	3.3428
ENSSSCG00000011952	3.32791
ENSSSCG00000004489	3.21702
ENSSSCG00000001341	3.08007
CCR4	3.04686
ANGPT2	2.94054
ENSSSCG00000035507	2.92096
EML4	2.91527
ENSSSCG00000014565	2.87718
ENSSSCG00000035811	2.84111
RPL22	2.83943
PFN1	2.77931
ENSSSCG00000032556	2.71229
MIF	2.71166
COX3	2.70674
ITGA4	2.58684
HINT1	2.56514
ENSSSCG00000012119	2.56174
ENSSSCG00000033019	2.55138
IL6R	2.54521
ENSSSCG00000034448	2.53206
RGS10	2.48944
CD9	2.43294
ENSSSCG00000024973	2.37084
ENSSSCG00000020830	2.35112
CARD19	2.34008
RPS21	2.32421
RPS13	2.25248
ENSSSCG00000036013	2.24014
PTPRCAP	2.21038
NDFIP2	2.19134
CD80	2.13493
RPL11	2.11189
TMEM173	2.09406
CXCR3	2.07156
ENSSSCG00000038351	2.05597
ENSSSCG00000039071	2.05351
ENSSSCG00000025928	2.05182
PABPC1	2.05115
MISP3	2.0006
ENSSSCG00000000576	1.99459
VIM	1.95889
PLP2	1.95782
ISG20	1.95395
ENSSSCG00000013597	1.91134
GLIPR2	1.90398
EEF1B2	1.89756
ENSSSCG00000003930	1.85593
CD8A	1.8545
STMN1	1.8542
ARF6	1.84367
ENSSSCG00000025499	1.83559
ENSSSCG00000031088	1.81459
ENSSSCG00000037775	1.77842
RPS26	1.75263
RPL37	1.74844
ENSSSCG00000027573	1.72076
GZMB	1.71336
TSPO	1.69689
SMC4	1.68148
ANXA1	1.65859
CD69	1.61895
ENSSSCG00000017239	1.61532
ENSSSCG00000004945	1.6136
ENSSSCG00000036716	1.611
ENSSSCG00000031912	1.58516
VAMP8	1.57392
RPS27	1.57269
ENSSSCG00000015447	1.55607
RPS17	1.55588
HLA.DRA	1.55485
ITM2B	1.54327
GADD45A	1.54069
BTG1	1.53422
ENSSSCG00000014569	1.52227
HSD11B1L	1.51261
CALM1	1.48795
DYNLT3	1.47723
ND4	1.47098
S100A13	1.46898
SMAP1	1.45342
PLXND1	1.40993
PSMB9	1.39683
ENSSSCG00000008433	1.39059
ENSSSCG00000010203	1.37805
LSP1	1.33879
IFITM3	1.33733
ENSSSCG00000004970	1.32818
ND1	1.3235
ENSSSCG00000033697	1.32014
ENSSSCG00000012397	1.31208
ND2	1.30799
F2R	1.29754
COX17	1.29545
COX6A1	1.28594
ENSSSCG00000036114	1.28275
TPT1	1.28191
TCF7	1.28032
ENSSSCG00000032003	1.27663
RDX	1.27607
RPS9	1.27517
ENSSSCG00000033721	1.2709
RPL26	1.26968
RPL10	1.26102
ENSSSCG00000003691	1.25882
RPLP2	1.23585
KXD1	1.21434
RPS20	1.20777
RPL39	1.20372
UBC	1.19273
CD52	1.18706
ZNRF1	1.17235
RPL17.C18orf32	1.1668
RPS4X	1.16586
RPS18	1.15226
RACK1	1.14755
HSP90AB1	1.13425
ENSSSCG00000013064	1.13362
ENSSSCG00000001398	1.13239
ENSSSCG00000000657	1.11865
REEP5	1.10993
ARPC3	1.09746
ENSSSCG00000038507	1.09414
GPR183	1.09099
HSP90AA1	1.08659
IKZF2	1.04943
MAF	1.0476
HMGN3	1.04106
RPS14	1.03041
ENSSSCG00000016758	1.02751
RPS6	1.02287
ENSSSCG00000009303	1.02261
SLA.DQB1	1.00835
ENSSSCG00000005453	0.998721
ENSSSCG00000001455	0.995005
MRPS25	0.986832
TMEM50A	0.981652
HMGB2	0.971017
CFL1	0.970187
RPSA	0.970055
MNDA	0.96385
ENSSSCG00000037030	0.955446
RPLP0	0.947926
ARPC2	0.946173
RPL27	0.937563
DDX5	0.936179
CD247	0.934611
CD3G	0.923747
ENSSSCG00000024974	0.922117
ACTB	0.920037
BTF3	0.919898
ACTG1	0.908491
ENSSSCG00000029830	0.907342
ENSSSCG00000006081	0.904239
RPS10.NUDT3	0.903067
ENSSSCG00000008170	0.900441
HSPE1	0.896596
PSIP1	0.895208
ARHGDIA	0.893567
TYMS	0.88909
NME2	0.888572
ENSSSCG00000029596	0.885899
EZR	0.878896
RAC2	0.87339
RPS11	0.872792
NPM1	0.870896
EIF4A2	0.870328
OAZ1	0.86612
ENSSSCG00000028485	0.861913
ENSSSCG00000035256	0.854849
2021-09-06	0.854341
ENSSSCG00000016990	0.852694
RPS15	0.846364
ENSSSCG00000033500	0.841911
CYTB	0.840238
GSTA4	0.837514
SPCS3	0.834271
ENSSSCG00000006418	0.832807
COX6C	0.826451
EVL	0.82538
ENSSSCG00000014540	0.81943
NUCKS1	0.817595
LAPTM5	0.816276
ENSSSCG00000036296	0.815506
TMA7	0.813675
UBB	0.806723
PPP1CC	0.802341
ENSSSCG00000039740	0.80057
LY96	0.796234
RPS12	0.793554
ENSSSCG00000017509	0.792435
RORA	0.787305
H3F3B	0.785112
IFI6	0.783203
ENSSSCG00000039460	0.782615
EIF1	0.777989
ENSSSCG00000013889	0.77285
ARL6IP1	0.768239
FADS3	0.767961
HYPK	0.76376
LAMTOR4	0.761244
RPL3	0.76014
EEF2	0.759356
PSMB2	0.752697
ENSSSCG00000001779	0.750739
EMP3	0.749635
PTMA	0.746455
ENO1	0.745999
PTPRC	0.744232
RPL7A	0.741323
ENSSSCG00000022912	0.736927
MRPL57	0.734535
ENSSSCG00000016737	0.732292
DYNLL1	0.730392
ENSSSCG00000000905	0.72879
FTL	0.728556
ARPC5L	0.728379
GOLPH3L	0.728099
ENSSSCG00000004145	0.72626
EEF1D	0.724434
CAPG	0.720998
GPX4	0.717631
COX4I1	0.716121
HNRNPDL	0.712214
SSR4	0.710251
SON	0.709654
LNPEP	0.708845
SOD1	0.700964
ENSSSCG00000011234	0.700282
ENSSSCG00000003914	0.692908
SUMO2	0.6879
SSR2	0.686386
ZFP36L2	0.68458
CD37	0.683174
ENSSSCG00000004666	0.682059
NDUFA13	0.681663
COX5B	0.681357
PARVG	0.678543
ENSSSCG00000040118	0.674152
ENSSSCG00000008061	0.673691
COX7C	0.672877
ENSSSCG00000039046	0.66166
ENSSSCG00000007188	0.660933
ENSSSCG00000033733	0.657895
STK17B	0.654081
CTSC	0.654028
ENSSSCG00000033734	0.653563
EIF4B	0.65091
ABLIM1	0.6494
H3F3A	0.649196
ENSSSCG00000009327	0.649166
PSMB8	0.645618
RABAC1	0.645482
ENSSSCG00000032017	0.641478
ENSSSCG00000037885	0.640685
ENSSSCG00000039581	0.640681
TRAT1	0.639281
PNISR	0.636883
MYO1F	0.636451
ATP6V1G1	0.633722
ENSSSCG00000014075	0.633516
COX7A2L	0.629482
ARPC1B	0.628727
CAPZA1	0.628519
ENSSSCG00000001456	0.628438
TPM3	0.627175
HSPA8	0.626564
EMB	0.62587
RPL36AL	0.623529
KLK7	0.614914
ENSSSCG00000033909	0.614212
SERPINF1	0.612847
NDUFB10	0.612705
SLC25A6	0.611387
CD3E	0.606245
CORO1A	0.603485
RHOG	0.603075
CDK2AP2	0.601796
DUSP1	0.598612
ENSSSCG00000017213	0.598562
PNRC2	0.596517
LIMD2	0.596171
CCNG1	0.595026
CD2	0.593378
MT3	0.589835
ENSSSCG00000002004	0.589611
CD5	0.587813
PARK7	0.586804
ENSSSCG00000013661	0.584531
ATP5MC1	0.583615
TMBIM6	0.581065
ETS1	0.58104
MBNL1	0.5791
FUNDC1	0.576614
CAPZB	0.576183
ISCU	0.57591
MSN	0.575714
ENSSSCG00000035520	0.573631
MYO1G	0.570373
SRSF2	0.569745
EIF3K	0.568993
RAP1A	0.564838
HNRNPH1	0.561534
JAK1	0.559752
BZW1	0.558046
ETHE1	0.557738
CHD3	0.557469
KLF2	0.556717
ARPC5	0.556703
THYN1	0.556066
ENSSSCG00000015337	0.555245
ENSSSCG00000003253	0.550801
ENSSSCG00000013366	0.548388
SERBP1	0.547654
POLR2K	0.545504
ATP5F1E	0.544788
CTSS	0.544276
RNF19A	0.54315
NOP53	0.541004
ENSSSCG00000016262	0.540913
CCDC50	0.535562
CEP164	0.535345
ENSSSCG00000004414	0.53423
ARL4C	0.531417
IL7R	0.530906
COX7B	0.528546
GABARAP	0.528395
ENSSSCG00000023331	0.52762
MICOS10	0.525324
AKAP7	0.52443
RPL10A	0.523694
ENSSSCG00000016263	0.522406
GAPDH	0.522351
LCK	0.51998
NMI	0.519653
ENSSSCG00000003520	0.51928
VPS28	0.518276
SAP18	0.517865
PKM	0.517041
TUBA1B	0.516954
2021-09-01	0.514
ND5	0.513177
GPR174	0.511475
ENSSSCG00000000071	0.509435
TMEM123	0.50901
CIRBP	0.507978
UQCRQ	0.506198
DDIT4	0.505819
YWHAZ	0.505803
PCBP2	0.505188
SMAD2	0.502717
AHI1	0.501934
NAP1L1	0.499468
ATP6V1E1	0.497978
ITGB2	0.497927
UBL3	0.497572
ND3	0.496522
CNBP	0.496107
EIF3E	0.494689
PNRC1	0.494621
YWHAB	0.493096
PPIB	0.493093
DYRK2	0.492349
ATP6V0B	0.490671
FYB1	0.488813
ENSSSCG00000027675	0.488012
SNRPE	0.48558
DDOST	0.485381
RGS19	0.484854
CD86	0.484834
HDAC2	0.484158
DNAJA1	0.480034
UNC119	0.48002
SRSF5	0.478691
KDM1B	0.478454
CLINT1	0.477488
GNB2	0.476594
ECHS1	0.476333
CGGBP1	0.476109
FKBP11	0.471666
ATRX	0.471342
ANKRD12	0.469307
ENSSSCG00000036096	0.468723
LMO4	0.468543
UBE2D3	0.467488
BCAP31	0.467397
ITGB7	0.467135
CDC123	0.467096
TBCA	0.46356
ENSSSCG00000018063	0.462548
PTP4A2	0.462254
GMFG	0.46184
HCLS1	0.461488
ENSSSCG00000034709	0.461321
ENSSSCG00000001075	0.459786
SKAP1	0.458764
BRK1	0.457846
ENSSSCG00000033068	0.457634
ENSSSCG00000023158	0.456956
PSMB10	0.456749
HNRNPK	0.454835
DBI	0.450346
TAF1D	0.44832
ENSSSCG00000020790	0.447893
ENSSSCG00000015710	0.447872
UBXN1	0.446697
NDUFB4	0.446652
PRR7	0.446064
SRI	0.44581
EIF3H	0.445296
COX5A	0.445101
ATP5MC2	0.444899
LCP1	0.443768
ENSSSCG00000014343	0.443042
NDUFS5	0.440247
CAP1	0.440186
LCN2	0.439668
SEC11A	0.439561
MAP3K1	0.439505
CCT2	0.439482
COX8A	0.437519
ENSSSCG00000009772	0.436328
CD48	0.434826
C15orf48	0.433742
ENSSSCG00000037081	0.431956
ENSSSCG00000013992	0.431662
ENSSSCG00000036350	0.430582
TMEM59	0.430459
ENSSSCG00000015499	0.43044
COX7A2	0.430006
ZNF277	0.429418
CYTIP	0.429196
CD3D	0.428301
ENSSSCG00000003903	0.427888
DDX46	0.427539
ENSSSCG00000015040	0.425926
ADD3	0.425633
AQP3	0.423822
ENSSSCG00000027565	0.423627
PDCD10	0.423453
ENSSSCG00000013596	0.42317
ATP5PB	0.42223
RTRAF	0.422195
PTPN18	0.420706
ZC3H12D	0.419017
SMDT1	0.418817
ENSSSCG00000024776	0.418347
IL10RA	0.418217
NTAN1	0.417496
PTPN4	0.417226
SUCLG2	0.41692
2021-09-07	0.416601
KRTCAP2	0.416173
ENSSSCG00000002550	0.416047
ENSSSCG00000034868	0.41467
SKP1	0.414401
ENSSSCG00000012166	0.413949
ENSSSCG00000034019	0.413899
SIT1	0.41351
CD63	0.413319
ENSSSCG00000012961	0.413051
FCGRT	0.410847
APBB1IP	0.410637
ESD	0.410287
SEC61B	0.41008
TGIF2.RAB5IF	0.40989
PRKACB	0.409664
SLC25A3	0.408963
EIF3I	0.408885
IRF5	0.408347
HMGN2	0.40828
MIEN1	0.408088
MGST3	0.407627
ARF4	0.407621
HNRNPM	0.405852
SDF4	0.404761
RNASEH2B	0.404014
ENSSSCG00000026064	0.403632
EGLN3	0.40304
ENSSSCG00000033653	0.402898
PRRC2C	0.402546
MAP2K2	0.402245
ISG15	0.401402
PFDN4	0.401016
HMGN4	0.40071
NOP10	0.40055
ENSSSCG00000028397	0.400182
ATP5IF1	0.400136
RBX1	0.398498
CNN2	0.397883
POLR1D	0.397504
ARPC4	0.397149
SSB	0.397022
RHEX	0.396673
FAM49B	0.396537
ENSSSCG00000037602	0.396519
ENSSSCG00000005656	0.396493
RASGRP2	0.396246
ARHGAP15	0.395931
RHOA	0.39539
NFKBIB	0.394155
MGAT4A	0.393949
CSK	0.393366
CD81	0.39333
SEC61G	0.392458
HMOX2	0.392432
ENSSSCG00000007743	0.39163
H2AFV	0.391595
ENSSSCG00000036988	0.391393
PTBP3	0.389518
PSME1	0.387361
SF3B1	0.386671
ZC3HAV1	0.386299
CCND3	0.385467
ZRANB2	0.385185
ENSSSCG00000034190	0.384511
ENSSSCG00000036491	0.384305
TLE5	0.383638
RBBP4	0.383483
ENSSSCG00000000273	0.382858
CAPN1	0.382312
ENSSSCG00000000697	0.382118
DAD1	0.381459
ARL6IP5	0.378966
ENSSSCG00000020777	0.376895
HCST	0.376696
KMT2E	0.376326
ENSSSCG00000004307	0.375976
ENSSSCG00000035728	0.375333
PDK1	0.375319
IKZF3	0.375173
COTL1	0.374704
FAXDC2	0.374702
ARHGAP30	0.373773
UBE2L6	0.373765
ZFP36	0.373115
RALGPS2	0.372335
PSMA7	0.371826
ENSSSCG00000038711	0.371719
GM2A	0.370493
RBM39	0.369922
BPGM	0.369528
OCIAD1	0.369466
CCT4	0.368876
RAB2A	0.36872
HNRNPC	0.368349
GNG2	0.368209
NDUFB9	0.367983
WDR1	0.367812
DAPL1	0.366988
MAX	0.366943
ENSSSCG00000005518	0.366838
CACYBP	0.366684
POLR2F	0.366483
CYBA	0.366306
CHIC2	0.365817
THOC2	0.365518
RALY	0.36527
CAMK4	0.365043
TXNDC17	0.364808
LRCH4	0.364699
ENSSSCG00000014371	0.363823
EIF4G2	0.363747
VASP	0.363679
EIF4A1	0.362161
HBB	0.36167
STK4	0.361083
PPP1R18	0.360638
MPHOSPH8	0.359784
TNFAIP8	0.35919
S1PR1	0.358881
RAP1B	0.357893
SRRM2	0.357452
EIF2S2	0.357337
CCNI	0.356668
MTDH	0.356149
G3BP1	0.35574
ENSSSCG00000001396	0.354904
ENSSSCG00000039582	0.354767
SGCA	0.354638
ENSSSCG00000035869	0.354465
HSPA5	0.354438
NOP56	0.354393
IFI44L	0.354269
DDT	0.353897
CAPZA2	0.353366
ENSSSCG00000023792	0.352785
ENSSSCG00000033744	0.352645
ENSSSCG00000017555	0.352549
UQCRC1	0.352426
ENSSSCG00000014850	0.352331
CSTB	0.352261
ENSSSCG00000001097	0.352258
BIN2	0.352038
PRDX6	0.351915
RNPS1	0.351469
C11orf58	0.350407
ENSSSCG00000007688	0.350096
ELOC	0.349832
TOMM7	0.349805
ENSSSCG00000004415	0.349645
CCT7	0.348945
UBE2V1	0.348686
ENSSSCG00000016711	0.34854
ATP5MD	0.348484
FLI1	0.348313
NDUFS8	0.34802
ENSSSCG00000028479	0.346781
NFE2L2	0.34652
CDC5L	0.34628
EDF1	0.345986
SAMD9	0.345783
STAT1	0.345115
TMEM154	0.344942
IQGAP1	0.34485
GPD1	0.344582
ENSSSCG00000000405	0.343749
LAT	0.343464
SFPQ	0.343386
CUTA	0.343186
TRMT112	0.342802
LAMTOR2	0.342235
ENSSSCG00000012178	0.341547
GNAI2	0.340978
ANGPTL1	0.340889
ENSSSCG00000007978	0.340608
ENSSSCG00000003849	0.340568
HSPB1	0.340549
RAN	0.340223
CNDP2	0.339881
PSMA3	0.339694
ENSSSCG00000039706	0.339549
ATP5F1C	0.338837
ARRB2	0.338216
ENSSSCG00000029857	0.33793
ENSSSCG00000021591	0.337449
TRAF3IP3	0.33698
EIF4H	0.336938
SFT2D1	0.336703
ENSSSCG00000002907	0.336466
TM2D1	0.335864
FLT3LG	0.334953
TRA2B	0.33468
PSMB4	0.334442
HNRNPLL	0.334329
TSC22D3	0.334209
BIRC3	0.334089
LAMTOR5	0.33401
SRP14	0.333955
IK	0.333338
TES	0.332759
RAB5A	0.332294
SELENOF	0.33196
HNRNPU	0.33194
ENSSSCG00000012757	0.331596
TAX1BP1	0.331441
DHRS7	0.331333
GPSM3	0.331328
MAP1LC3B	0.331169
TMCO1	0.331147
ZBTB38	0.33106
PAIP2	0.330837
ARID4B	0.330648
ENSSSCG00000027196	0.330307
HIGD2A	0.329753
ENSSSCG00000018061	0.329677
RCAN3	0.328504
ENSSSCG00000034527	0.327592
CHD1	0.327372
SDCBP	0.326634
ENSSSCG00000015664	0.326212
ENSSSCG00000007088	0.326127
RBMX	0.325645
FLNA	0.325579
TBC1D20	0.325564
ENSSSCG00000028663	0.325276
EIF3D	0.325179
RGCC	0.324871
ARGLU1	0.324597
KHDRBS1	0.324051
MVP	0.324017
ERH	0.323712
SF3B5	0.323612
GUK1	0.323472
DDX17	0.323343
UBE2B	0.322984
MCL1	0.322788
ENSSSCG00000024263	0.322729
ENSSSCG00000004446	0.32114
STARD4	0.321139
CD47	0.320692
SPTBN1	0.320689
KRAS	0.320576
LBR	0.320095
SETX	0.319776
NUDT21	0.318666
SF3B2	0.318462
PDIA6	0.31819
NDFIP1	0.31813
PPP2R5C	0.318067
IDH2	0.317942
ACP1	0.317675
ENSSSCG00000010158	0.317588
CRLF3	0.31681
ATP5PO	0.316648
ENSSSCG00000010674	0.316645
ENSSSCG00000017626	0.316595
ANKRD10	0.31632
MCRIP1	0.316029
SPCS1	0.315749
EIF1B	0.315701
PRKCSH	0.314577
ENSSSCG00000013878	0.313601
PPP1CB	0.313382
SMC6	0.312806
RBM8A	0.312788
ENSSSCG00000000663	0.312681
BAX	0.312384
ENSSSCG00000040857	0.312037
SLC9A3R1	0.311419
SYNGR2	0.311319
AFTPH	0.310586
RASSF4	0.310298
ATF7IP	0.310214
LBH	0.310097
RASA3	0.309566
EPSTI1	0.309338
ENSSSCG00000027840	0.309021
C6orf62	0.308903
CHRAC1	0.3084
PRELID1	0.306368
CTNNB1	0.305971
ENSA	0.305631
NEDD8	0.305541
SEC62	0.30554
VAMP5	0.305158
SASH3	0.304912
CCT5	0.304571
TSC22D4	0.304499
PDCD4	0.304471
AIMP1	0.304225
PVRIG	0.303996
ATP5ME	0.303193
PSMD2	0.302386
ENSSSCG00000040248	0.302337
GABARAPL2	0.302279
COPS6	0.302087
ATP5PF	0.301804
NSD3	0.30174
FAM104A	0.301383
LYST	0.30114
GATA3	0.301065
KARS	0.300771
CD38	0.300604
ND6	0.300403
TNRC6B	0.300235
TNIP1	0.300233
C12orf10	0.299369
GNAI3	0.299152
RTF1	0.299073
RAP2B	0.299047
ENSSSCG00000033703	0.297673
PAK2	0.297399
ACTR2	0.297234
ENSSSCG00000027348	0.296943
CHD2	0.296433
RAB7A	0.295905
HNRNPH3	0.295794
LEPROTL1	0.295741
ATP5F1A	0.295335
PSMB1	0.29503
SMCHD1	0.294884
DAZAP2	0.294585
ELMO1	0.294391
SCAND1	0.294327
STAG2	0.294246
MRPL17	0.294054
SUMO1	0.29366
IPO11	0.293361
ENSSSCG00000001038	0.293242
ENSSSCG00000006061	0.293219
SELENOH	0.293184
EIF3A	0.292932
ERBIN	0.29287
SUCLG1	0.292798
CYCS	0.29265
SAFB	0.292602
RASGRP1	0.2926
WAS	0.292216
ADH5	0.292213
STAT5B	0.292104
BUD31	0.292097
ENSSSCG00000009851	0.291727
GRB2	0.291516
CFLAR	0.29095
NDUFB8	0.290696
ENSSSCG00000013315	0.290546
FYN	0.289758
CREBZF	0.289745
NAA20	0.28956
CHMP4B	0.289445
FERMT3	0.289067
RSU1	0.288728
SRRM1	0.288098
ENSSSCG00000016226	0.287583
EEF1AKMT1	0.287105
ATF4	0.286999
PDLIM7	0.286342
RNF181	0.285965
PPP2CA	0.28574
IFNAR1	0.285669
ENSSSCG00000013052	0.285582
MBNL3	0.285509
LAPTM4A	0.285096
CCND2	0.285021
PIK3R1	0.284973
ENSSSCG00000027826	0.284936
SNRPC	0.284867
POMP	0.284546
UTRN	0.283774
IFIT1	0.283753
TRAPPC5	0.283734
SH3GLB1	0.283431
ARFGAP3	0.28308
TMEM9B	0.283005
EIF6	0.283001
ENSSSCG00000036658	0.283
SNRPD1	0.282763
RPIA	0.282067
ENSSSCG00000016970	0.282006
UBXN11	0.281939
NDUFC2	0.28176
EMD	0.28146
POLR2I	0.281326
PNN	0.281272
SNX3	0.281234
POLE4	0.281231
KIF5B	0.281224
ZAP70	0.281218
AHR	0.280944
ENSSSCG00000013721	0.280593
TTC14	0.280573
PSMF1	0.280421
LAT2	0.280296
GLRX3	0.28028
HP1BP3	0.280145
OTULINL	0.279399
VPS29	0.27931
CD4	0.27915
STAT4	0.278829
NCL	0.278596
GTF2H5	0.278532
PSENEN	0.278461
TSPAN5	0.278398
PRDX2	0.277815
NDUFA1	0.277773
ENSSSCG00000030295	0.277069
MRPL41	0.276962
RNH1	0.276809
MALT1	0.276382
SLA.DMA	0.276121
SRPK2	0.276057
MID1IP1	0.27605
CETN3	0.275741
GCHFR	0.275675
ELAVL1	0.275532
BLOC1S1	0.275391
STRAP	0.275336
DNMT3A	0.275199
ELF1	0.274626
FGD3	0.274466
GCNT4	0.274373
TMEM50B	0.274326
SKIL	0.274248
ENSSSCG00000003771	0.273951
ST6GALNAC4	0.273859
PSMB7	0.273784
ID3	0.273452
TPM4	0.273301
IL2RA	0.27325
TRAM1	0.273248
FOXN3	0.27323
DERA	0.272965
BTG2	0.272937
PRPF40A	0.272899
SNF8	0.272814
DPY30	0.272412
NDUFC1	0.272365
SPTLC2	0.271036
ENSSSCG00000027491	0.271026
PLGRKT	0.270977
SH2D1A	0.270933
ENSSSCG00000007355	0.270648
SMARCE1	0.270162
SLC25A36	0.269971
H2AFZ	0.269603
TXNIP	0.269539
FAM210B	0.269536
BAG1	0.268815
LGALS1	0.26862
CALCOCO2	0.268566
TIMM8B	0.268189
YWHAQ	0.268185
TXK	0.268128
PFDN1	0.267965
SRP19	0.267752
ABHD6	0.267641
MRPS15	0.267381
TAGAP	0.267354
ENSSSCG00000000365	0.266762
ENSSSCG00000013436	0.266761
AHSA1	0.266741
LSM14A	0.266597
ENSSSCG00000012916	0.2664
TBC1D10C	0.266365
CD53	0.2662
BCCIP	0.266098
SSR3	0.265818
SF3B6	0.265768
ATP6V0C	0.265728
SYNCRIP	0.265181
EIF5B	0.265163
MRPL20	0.264714
NBN	0.26455
TCP1	0.264408
ERP44	0.263865
EMC6	0.263513
ENSSSCG00000038364	0.263491
MYO5A	0.263262
ENSSSCG00000033272	0.26294
ANAPC16	0.26237
NUB1	0.262328
CCAR1	0.262087
THOC7	0.261915
TCEA1	0.261208
ENSSSCG00000027746	0.261054
API5	0.260659
GPBP1	0.260542
MTF2	0.260513
RBMS1	0.260044
ATP5MC3	0.26003
RANBP1	0.259859
ABI1	0.258799
CSNK1A1	0.258797
RNASEH2C	0.258654
DNAJC8	0.258565
PPP4R3B	0.258553
SERP1	0.258279
ENSSSCG00000016100	0.258095
GPR171	0.257508
BIN1	0.256957
ENSSSCG00000034314	0.25683
MOB1A	0.256808
PSMA6	0.256806
ENSSSCG00000013720	0.256746
MRPL55	0.256703
TMED5	0.256509
BPTF	0.256495
CLEC12A	0.256414
DCAF8	0.256411
ENSSSCG00000009788	0.256351
TASOR	0.256283
ENSSSCG00000039249	0.256278
CAPRIN1	0.256255
ENSSSCG00000027790	0.255923
ENSSSCG00000010795	0.255832
MED10	0.255797
TPR	0.255675
CTSA	0.25566
ENSSSCG00000027085	0.255622
ENSSSCG00000035538	0.255399
ENSSSCG00000038444	0.255349
MDH2	0.254716
ACP5	0.254639
ENSSSCG00000010517	0.254586
CDKN1B	0.254532
SNX6	0.254359
ENSSSCG00000011121	0.254322
SRSF10	0.254248
U2SURP	0.253835
BCAP29	0.253823
KLF3	0.253617
SNRPN	0.253168
ALG13	0.253039
PAXX	0.253007
FUS	0.252857
ENSSSCG00000037143	0.25284
RBM26	0.252718
SS18L2	0.252577
CCSER2	0.252096
MRPL52	0.251905
ENSSSCG00000024313	0.251899
LAX1	0.251642
BRD2	0.251578
TALDO1	0.25144
CCT3	0.251381
RSRP1	0.251199
ENSSSCG00000009145	0.251114
CSDE1	0.250738
LDLRAP1	0.250542
SH3BGRL	0.250091
PFDN2	0.250047
CWF19L2	0.249944
CDKN2AIPNL	0.249618
NDUFB2	0.249423
ENSSSCG00000005768	0.249328
GRK6	0.249147
XBP1	0.249106
SMPD1	0.249002
CHCHD3	0.248863
ENSSSCG00000010320	0.248697
RCHY1	0.248684
MDH1	0.248603
LSM7	0.248436
ENSSSCG00000032166	0.248285
YBX3	0.248239
ENSSSCG00000030478	0.248083
NOL7	0.247858
RPS19BP1	0.247829
SYF2	0.247742
WASF2	0.247532
RNF114	0.247285
COA3	0.24717
ENSSSCG00000000097	0.247075
IL2RB	0.247031
ACOT13	0.247029
MRPL12	0.246912
TAPBP	0.246653
TIMM13	0.246416
CNP	0.246117
MPC2	0.246092
EHD1	0.24603
NRBP1	0.245988
RSF1	0.245893
C20orf27	0.245644
CINP	0.245455
ATP6V1F	0.245333
KDELR1	0.245058
FBL	0.244929
TIMM9	0.244655
ENSSSCG00000021560	0.244408
M6PR	0.244203
DDX6	0.243825
CDC14A	0.243689
ENSSSCG00000003211	0.243463
RBM42	0.243407
MANF	0.24336
EIF3L	0.243106
OXA1L	0.242899
ENSSSCG00000012811	0.2427
PPP1R12A	0.242322
ENSSSCG00000000377	0.242205
ILF2	0.241741
TWF2	0.241471
TGIF1	0.241436
ABCB7	0.241154
ENSSSCG00000039658	0.240979
YWHAH	0.240857
ENSSSCG00000037364	0.240843
BUD23	0.240794
NUP50	0.240619
SPTAN1	0.240571
ILF3	0.240559
SH3KBP1	0.240487
ENSSSCG00000039635	0.240356
PPM1A	0.240069
RER1	0.239956
HMGA1	0.239909
SRSF6	0.23982
RSRC2	0.239627
ENSSSCG00000014280	0.239518
HNRNPR	0.239498
RILPL2	0.239255
MED30	0.239248
RPL26L1	0.238772
NANS	0.238568
ENSSSCG00000004963	0.238422
TVP23C	0.238337
PUF60	0.238236
SPAG8	0.238149
AKAP9	0.23769
IL27RA	0.237678
PIAS1	0.237556
DRG1	0.237531
ARHGAP9	0.236715
SMARCA5	0.23659
KCNAB2	0.236551
RCSD1	0.235928
CELF1	0.23565
DDX39B	0.234785
GPS1	0.234626
SNRK	0.233467
MFSD10	0.23212
PSMB3	0.232067
SRSF7	0.232049
PHF14	0.232003
CDK4	0.231767
MFNG	0.231689
RALBP1	0.231515
ENSSSCG00000034072	0.231423
ENSSSCG00000031152	0.231236
NSRP1	0.231131
TMEM71	0.230785
TMEM258	0.230462
ENSSSCG00000022176	0.230264
EPB41	0.230136
PTPN6	0.229876
IAH1	0.229811
PSMA4	0.229787
DUSP2	0.229744
GYPC	0.229471
GSPT2	0.229286
SLC25A39	0.229151
FNBP4	0.229033
NDUFA6	0.228861
CPNE3	0.228543
BTF3L4	0.22854
CPSF6	0.228339
CCDC25	0.228275
ACADVL	0.228132
PRPF4B	0.227998
SP110	0.227869
PSAP	0.227674
REV1	0.227652
ROCK1	0.227554
CRIPT	0.22716
TPMT	0.227103
BBX	0.227041
UQCR10	0.22689
BCAS4	0.226797
MRPS24	0.226508
POLR2E	0.226421
ALDH3A2	0.22614
PSMC5	0.225965
GSN	0.225837
SARNP	0.225555
GOLGA4	0.225298
PLEKHA1	0.224961
ENSSSCG00000036483	0.224678
POLR2D	0.224658
PSMD14	0.224504
ENSSSCG00000003885	0.224266
UBE2D2	0.224018
RFXANK	0.223845
MRPL43	0.223566
MAP2K3	0.223384
SLA2	0.223226
ENSSSCG00000010104	0.223007
PDE3B	0.222676
TUBA4A	0.222551
SELENOT	0.222542
STOML2	0.222508
CDC37	0.222376
CNOT7	0.222282
NDUFV2	0.222221
TXNDC15	0.222121
DHX9	0.222007
RNF7	0.221844
NREP	0.221748
PEF1	0.221625
ICOS	0.2216
CNPY2	0.221593
RSL1D1	0.221485
ENSSSCG00000009241	0.22133
COMMD1	0.221326
ENSSSCG00000003261	0.22129
IMP4	0.221207
ENSSSCG00000038359	0.221134
HSPD1	0.220787
EMC3	0.220759
NDUFB7	0.220716
ENSSSCG00000011117	0.220707
DNMT1	0.220567
ME2	0.220399
RAB1B	0.220383
ENSSSCG00000009341	0.220329
APOBEC3B	0.22027
IRF2BP2	0.220162
ANGEL2	0.220104
PSMC3	0.2201
SEC11C	0.220066
IDH3G	0.219878
ENSSSCG00000014031	0.219866
TMED9	0.219617
ILK	0.219592
ADAM19	0.219535
CCPG1	0.219499
PIP4K2A	0.219176
FLOT1	0.219145
SIVA1	0.21907
TUT4	0.219002
PPP1CA	0.21893
TAB2	0.218784
DOCK11	0.218727
STXBP2	0.218705
CD84	0.218702
METAP2	0.218699
THEMIS	0.218696
GLUD1	0.218292
VPS36	0.218167
STXBP3	0.217963
GDI2	0.217908
HIKESHI	0.217838
ENSSSCG00000006830	0.217706
MEA1	0.21743
PPIG	0.217082
AP2S1	0.217026
DYNLT1	0.216979
TRA2A	0.216667
SHISA5	0.216543
SUGT1	0.216425
CCNC	0.216147
ENSSSCG00000031580	0.215893
ITGA2B	0.215877
STK38	0.215844
REST	0.215599
PTP4A3	0.215594
TNFRSF4	0.215409
ATXN10	0.215206
TBL1XR1	0.215191
SNU13	0.215145
SCML4	0.214996
GRAP2	0.21498
SLC44A2	0.214461
OGA	0.213844
PRPS1	0.213761
CITED2	0.213709
AIP	0.213588
BRMS1	0.213543
CDCA7L	0.213463
BOLA3	0.213347
PDE4D	0.213303
UQCC2	0.213228
GIT2	0.213218
GSK3B	0.213151
ENSSSCG00000017671	0.213091
BDP1	0.213041
ADSL	0.212933
MDFIC	0.212739
ENSSSCG00000002953	0.212648
RNF149	0.212491
ETFRF1	0.212326
SREK1	0.21208
MMD	0.212008
TXN2	0.211984
UBE2G1	0.211839
RASAL3	0.211814
ZNF292	0.211744
GNA15	0.211741
ATXN7L3B	0.211715
EIF4A3	0.21153
URI1	0.211397
HERPUD1	0.211381
ENSSSCG00000028035	0.211335
FAS	0.211038
RHEB	0.210889
GCC2	0.210572
TGFB1	0.210501
ENSSSCG00000035048	0.210408
CYBC1	0.210222
HNRNPD	0.210176
UBASH3A	0.210147
PCMT1	0.209813
HSPA9	0.209803
HSPH1	0.209755
CBFB	0.209713
DBNL	0.209699
TAF11	0.209685
ENSSSCG00000001063	0.209583
EWSR1	0.209454
CDC42SE1	0.209368
MRPL34	0.209335
SLC4A7	0.209307
PTBP1	0.209242
IMMP1L	0.209215
MRPL54	0.209211
ENSSSCG00000002996	0.209119
RSBN1L	0.209086
NCBP2	0.209026
TP53INP1	0.209
IQGAP2	0.208981
PHB	0.208901
ENSSSCG00000011290	0.208839
CCDC115	0.208676
PHB2	0.208581
ARHGAP4	0.208553
FAM32A	0.208551
SERPINB9	0.208477
MCUB	0.207892
RASSF1	0.207792
MEAF6	0.207528
RFC2	0.207502
ASH1L	0.207474
CLTA	0.207194
STK26	0.207168
JARID2	0.20706
MMADHC	0.207033
SDHB	0.206989
IL6ST	0.206813
SSR1	0.20681
RCN2	0.206719
HM13	0.206456
SMIM19	0.206415
MORF4L1	0.206367
NUBP2	0.206276
ENSSSCG00000009625	0.206125
CTCF	0.206062
ITSN2	0.206028
TMED4	0.205839
SLTM	0.205498
ENSSSCG00000021738	0.205291
ENSSSCG00000037299	0.205209
SDHC	0.20488
ENSSSCG00000006324	0.204828
ENSSSCG00000025007	0.204716
ENSSSCG00000010734	0.20458
SMIM7	0.204492
ZC3H7A	0.204459
HIST1H1E	0.204321
PSMC4	0.204091
KCTD20	0.203983
IKZF5	0.203931
MAT2A	0.203636
ENSSSCG00000007609	0.203556
RABEP1	0.203549
ACSF2	0.203248
CTSH	0.203232
NAT9	0.202771
TAP1	0.202725
NCOA7	0.201882
ENSSSCG00000007203	0.201837
BABAM2	0.201715
ENSSSCG00000038581	0.201381
DDX18	0.201323
GTF2E2	0.201074
MRPL24	0.20097
PET100	0.200864
ATOX1	0.200659
DCTN3	0.200553
MFAP1	0.200477
ENSSSCG00000031897	0.2004
SPOCK2	0.200348
MRPL11	0.200249
THRAP3	0.199994
REX1BD	0.199903
MFF	0.199768
RPN2	0.199539
ENSSSCG00000014618	0.199449
C3orf38	0.199205
CTR9	0.199204
ENSSSCG00000008183	0.199186
ZC3H14	0.199004
PLSCR3	0.19892
SLC25A5	0.198916
HK3	0.1987
SNRPD3	0.198141
ENSSSCG00000006628	0.198053
NOP58	0.198044
SRPK1	0.19774
BUB3	0.197693
PARP11	0.197675
ENSSSCG00000006919	0.197663
LSM2	0.197617
YKT6	0.19747
LXN	0.197411
RASSF5	0.197391
CANX	0.197355
C1orf21	0.197221
RPA2	0.196973
ENSSSCG00000001505	0.196868
FAM126A	0.19681
TAOK3	0.196747
SYAP1	0.196691
LMAN2	0.196639
HTATIP2	0.196628
IRF2	0.196627
ANAPC13	0.196356
ENSSSCG00000017928	0.196327
ITK	0.196212
NDUFB11	0.196176
NUDC	0.196146
RAC1	0.195963
TNRC6A	0.19595
GPI	0.195604
PSMD13	0.195482
MDM4	0.195435
YTHDC1	0.195349
GHITM	0.195173
PHF5A	0.194714
CORO1C	0.194554
ABHD3	0.194552
SPEN	0.194497
ENSSSCG00000039618	0.194409
CAST	0.194241
PPP4C	0.194237
PRMT1	0.194231
LSM8	0.194088
RESF1	0.193998
PDCD6	0.193866
NCOR1	0.19374
ENSSSCG00000015434	0.193714
ARL2	0.193678
NDUFA11	0.193331
CFDP1	0.193294
ENSSSCG00000025593	0.193261
CMAS	0.193194
SPG21	0.193185
UBAC2	0.19318
ERGIC2	0.193045
ZNF148	0.192874
PLEKHB2	0.192789
EXOC2	0.192535
ETFA	0.19243
2021-09-09	0.192321
ENSSSCG00000023603	0.191937
SAR1B	0.191553
ENSSSCG00000028097	0.191532
BAZ1A	0.191483
LIPA	0.1914
MAGT1	0.191258
CREB1	0.191243
RSL24D1	0.191209
ENSSSCG00000014013	0.191015
ZC3H15	0.190846
CHORDC1	0.190809
PDIA3	0.190719
PIGC	0.190658
ENSSSCG00000008898	0.190657
IFIH1	0.190593
CD6	0.190429
CSRP1	0.190118
ENSSSCG00000006363	0.190046
CKS1B	0.189931
RAB11B	0.189914
CWC25	0.189803
CXCR4	0.18971
NAA16	0.18961
ARL4A	0.189571
R3HDM4	0.18952
STIP1	0.189389
ZNFX1	0.189332
CALR	0.189305
PSTPIP1	0.189202
ENSSSCG00000031773	0.189172
WSB1	0.189138
ENSSSCG00000032459	0.18892
FCF1	0.188823
PGK1	0.188356
EIF2S1	0.188217
ARHGAP25	0.188195
DENND2D	0.188139
NFKB1	0.188138
NDUFS7	0.188133
CD1D	0.188103
FANCL	0.188015
MAPKAPK3	0.187976
TMEM156	0.187928
FAM89A	0.187621
CYLD	0.187597
TEX264	0.187546
DDX54	0.187513
ENSSSCG00000037869	0.187504
CFAP36	0.187468
ENSSSCG00000040827	0.187449
UBLCP1	0.1874
DR1	0.187267
DDX3X	0.187237
NDUFAF2	0.187178
PPP3CA	0.187092
ENSSSCG00000023595	0.187007
ZFP36L1	0.186988
CEBPB	0.186979
ARID4A	0.186901
ERAP2	0.186848
GOLGA7	0.186776
DYNLRB1	0.186624
TIMM17B	0.186597
SURF4	0.186593
LASP1	0.186531
BRD7	0.186494
SDHD	0.186372
CLK1	0.186266
PTP4A1	0.186232
CDK9	0.186171
NSMCE1	0.186145
YY1	0.186048
CLTB	0.185945
RHOF	0.185865
ENSSSCG00000027778	0.185846
ENSSSCG00000040528	0.185742
POLR2G	0.185705
TOX	0.1857
DSP	0.185613
TTC3	0.185578
CWC15	0.185378
ENSSSCG00000005436	0.185155
STRADB	0.185046
VPS4B	0.184915
TSR3	0.184848
COMMD6	0.184835
ENSSSCG00000036247	0.184574
IFI35	0.184544
SDHAF2	0.184379
DCTN6	0.184352
EPC1	0.184303
SBNO1	0.184251
VAV1	0.184226
CIR1	0.184183
LAMP2	0.183947
SMC3	0.183843
SSH1	0.183598
ARID5B	0.183592
YIPF3	0.183579
CPSF2	0.18321
ENSSSCG00000032134	0.183201
MAP4K1	0.183088
ENSSSCG00000023126	0.182839
PPIH	0.182606
DARS	0.182486
RBM4	0.182483
DDX24	0.182393
RNF4	0.182373
C12orf57	0.18231
NAXD	0.182093
KLHL15	0.181998
RAB24	0.181977
MRPL40	0.181816
PHF3	0.181706
TPI1	0.181674
CCDC107	0.181567
NUDT9	0.18133
DOCK8	0.18127
RNF13	0.181195
SIRT7	0.180985
CLDND1	0.180848
LARP7	0.180663
ENSSSCG00000035650	0.180606
DOCK10	0.180487
ENSSSCG00000034711	0.18042
DPM1	0.180307
SDF2	0.180144
NOSIP	0.180007
ZKSCAN1	0.179971
FXR1	0.179964
MATK	0.179885
RASA1	0.179863
SMIM20	0.179809
TERF2IP	0.179659
BCLAF1	0.179571
CCS	0.179456
UCHL3	0.179443
CHURC1	0.179438
ENSSSCG00000027907	0.179402
SNRPF	0.179368
NPRL2	0.179337
NME1	0.179337
NOL9	0.179297
GTF2B	0.179112
MRPS18B	0.17911
MTCH1	0.17905
ORAI3	0.179019
OGFOD3	0.178936
NONO	0.178852
EIF1AX	0.178843
MPP1	0.178825
LAMTOR3	0.178655
INPP4B	0.178614
NABP1	0.178483
ENSSSCG00000027723	0.178365
AUP1	0.178357
ENSSSCG00000039331	0.178228
GTF2F2	0.178183
CNOT2	0.178176
DUT	0.177915
CCT8	0.177489
DNAJC2	0.177454
MRPS11	0.177392
CTSB	0.177256
MAP7D1	0.17724
FDX1	0.177142
CCNB1IP1	0.17694
PKN1	0.176824
RAB10	0.176763
YIPF5	0.176762
MTPN	0.176733
SARAF	0.176402
PARP8	0.176288
ENSSSCG00000005643	0.176184
REL	0.176067
MRPL22	0.176056
PHACTR2	0.17572
P3H1	0.175669
PHAX	0.175512
ENSSSCG00000005255	0.17549
ENSSSCG00000031169	0.175334
HDAC1	0.1753
HPF1	0.175229
DDX1	0.175187
NCK1	0.175156
RASSF2	0.175122
ENSSSCG00000010685	0.17504
MAK16	0.175009
ENSSSCG00000007098	0.174997
SCAF11	0.17495
ENSSSCG00000033212	0.174762
LSM6	0.174446
ENSSSCG00000039407	0.174285
RAB5C	0.174282
PPP4R2	0.174178
VTI1B	0.17408
TNIK	0.174054
ZNF395	0.173907
SIGIRR	0.173885
ENSSSCG00000007944	0.173758
POLDIP2	0.173751
ENSSSCG00000011764	0.173615
VDAC3	0.173462
MLF2	0.173397
ESYT2	0.173273
LANCL1	0.173187
SUN2	0.173005
ENSSSCG00000004392	0.173004
PPIL4	0.172977
HMCES	0.172896
GIPC1	0.172757
ENSSSCG00000002449	0.172732
PQLC3	0.172693
ENSSSCG00000029003	0.172655
ARFGAP1	0.172461
ENSSSCG00000010954	0.172451
NAA10	0.172428
ENSSSCG00000016475	0.172353
TUT7	0.172278
URM1	0.172201
EAPP	0.172061
TKT	0.171985
ACIN1	0.171958
PRDX3	0.171904
CIAO2B	0.171895
SLA	0.171775
TMUB1	0.17171
TMEM147	0.17149
UBAP2L	0.171398
CGAS	0.171316
ENSSSCG00000032942	0.171239
CEP192	0.171064
TP53	0.171025
AP1S1	0.170965
YEATS4	0.17086
TXNDC11	0.17083
ENSSSCG00000006156	0.170747
ACAP2	0.170655
CCDC124	0.170544
SERPINB1	0.17054
FKBP5	0.170485
CYC1	0.170438
MTA2	0.170069
RGS14	0.170019
FH	0.170007
PRDX4	0.16998
YPEL3	0.169782
DNAJA2	0.169706
WDR61	0.169651
ADD1	0.169643
MX2	0.169623
ENSSSCG00000008974	0.169531
GOT2	0.169488
BRD4	0.169415
AKAP8	0.169341
LAMTOR1	0.169032
ARID1A	0.169026
ENSSSCG00000013568	0.16899
ATAD1	0.168869
CERS2	0.168788
PCNA	0.168745
LRP10	0.16873
MIB1	0.168724
PCF11	0.168625
PABPN1	0.16853
ENSSSCG00000012382	0.16844
LYRM1	0.16834
CNOT6L	0.168105
ENSSSCG00000032073	0.168002
NDUFS3	0.16781
PTGES3	0.167676
PGPEP1	0.167424
KPNB1	0.167313
MKKS	0.167046
LGALS3BP	0.166947
MRTO4	0.166926
ENSSSCG00000008452	0.166611
FNBP1	0.166555
TRIM22	0.166476
PDS5A	0.166469
CDIPT	0.166462
ENSSSCG00000025060	0.166458
VCL	0.166432
TOP3A	0.166429
STK19	0.166355
C16orf91	0.16621
SARS	0.166087
SLU7	0.166043
RSAD2	0.165896
ENSSSCG00000009926	0.165812
AURKAIP1	0.165585
ENSSSCG00000039731	0.165565
C1orf35	0.165564
VPS25	0.165555
RBM14	0.165446
TMEM11	0.165305
TSTA3	0.165203
HADHB	0.165144
IVNS1ABP	0.165128
MAD2L1	0.164945
UCHL5	0.164879
ENSSSCG00000007947	0.164683
PXK	0.164562
STK25	0.164516
GDI1	0.164436
ENSSSCG00000017754	0.164371
HK1	0.164364
NIFK	0.164304
UBXN4	0.164301
PSMC6	0.164182
TSN	0.164177
COPS5	0.164162
CASP6	0.164049
FUNDC2	0.164034
2021-03-07	0.164025
SRPRA	0.163841
ARHGEF3	0.163826
ENSSSCG00000013453	0.163757
LAP3	0.163647
ACTR1A	0.163637
BAZ2A	0.163554
UGP2	0.163517
SLC38A2	0.163303
CSE1L	0.163287
RASA2	0.163169
ACTR6	0.163135
PDAP1	0.163073
ZNHIT1	0.163015
PQBP1	0.162973
ENSSSCG00000032311	0.162668
SRA1	0.162635
RPN1	0.162603
ITM2C	0.1625
ANXA11	0.162463
RTF2	0.162416
RAB18	0.162256
RNF10	0.16223
C5orf15	0.162129
ENSSSCG00000023160	0.16209
FAM3C	0.162038
TMEM165	0.161998
PRKCB	0.161956
ENSSSCG00000040782	0.161904
ENSSSCG00000033987	0.161844
COMT	0.161833
TIA1	0.1618
NUDCD3	0.161662
ENSSSCG00000020686	0.161588
UBE2V2	0.161562
ENSSSCG00000038304	0.16156
LCP2	0.161516
LRRC70	0.161406
LEO1	0.161367
SLIRP	0.161363
BAZ2B	0.161354
SNRNP25	0.161338
CCL5	0.161308
RAB27A	0.161223
ENSSSCG00000033757	0.161181
C12orf73	0.16115
GOLM1	0.161115
PPP2R2A	0.161055
ENSSSCG00000038989	0.160832
ENSSSCG00000000849	0.160501
CHMP5	0.160366
PRXL2A	0.160365
LAMP1	0.15992
TMEM160	0.159864
COPS3	0.159502
ENSSSCG00000016451	0.159309
COG3	0.159248
NDUFAF3	0.159225
MAP4K2	0.159115
TRMT1L	0.159085
TFAM	0.159074
AKIP1	0.158973
LENG8	0.158947
CCNL1	0.15885
IRF3	0.158529
TRABD	0.158443
ENSSSCG00000017906	0.158329
MED1	0.158181
DDRGK1	0.158167
ENSSSCG00000040942	0.158106
RHOH	0.158065
CUEDC2	0.157858
RPL7L1	0.157844
RAB35	0.157811
ATP1A1	0.157771
AGK	0.157747
RBM17	0.157727
STK39	0.157654
SEMA4A	0.15762
H2AFJ	0.157583
CALHM2	0.157523
ENSSSCG00000014267	0.157507
ENSSSCG00000036379	0.157499
BET1	0.157498
WIPI2	0.157482
LY6E	0.157428
CUL1	0.157339
POGLUT1	0.157286
PIK3IP1	0.157273
PTDSS1	0.157246
UPRT	0.15716
ENSSSCG00000022058	0.15711
OXR1	0.157011
APPL1	0.156941
RBM38	0.156931
CD44	0.156896
TAPBPL	0.1566
TLN1	0.156432
AGPAT5	0.156324
SNRNP200	0.156235
PIK3R5	0.156162
CYB5B	0.156122
HERPUD2	0.156085
COPZ1	0.155967
TMEM30A	0.155884
SNRNP40	0.155848
NUCB1	0.155826
ARCN1	0.155803
SF3A3	0.15568
POLE3	0.155346
DNAJC19	0.155265
C18orf32	0.155153
NDUFS4	0.155134
DKC1	0.154941
MFSD6	0.154844
ENSSSCG00000006665	0.154825
EIF4G3	0.15476
CISH	0.154733
BCL2A1	0.154677
MPG	0.15457
MRPL38	0.154434
FAR2	0.154404
CPD	0.154336
TMEM263	0.154302
CLNS1A	0.154239
SLC25A4	0.154221
ZNF827	0.154124
C6orf203	0.15411
ENSSSCG00000031530	0.154016
TRIR	0.153977
H2AFY	0.153878
ELK3	0.153849
NPTN	0.153821
RALA	0.153792
ENSSSCG00000002505	0.153706
PIGY	0.15369
SNAPIN	0.153589
ZFAND5	0.153553
CD226	0.153497
RAF1	0.153349
USP15	0.153285
MBIP	0.153205
SLAIN1	0.152998
FAM173A	0.152955
NCALD	0.152921
TXNL1	0.152777
IL4R	0.152765
R3HDM1	0.152764
PDK3	0.152759
RBM5	0.152731
ENSSSCG00000029066	0.152495
TAOK2	0.152416
ENSSSCG00000039980	0.152207
ROMO1	0.15219
ENSSSCG00000020808	0.152176
DERL1	0.152118
SNRPA1	0.152103
RAD21	0.152076
SLC35C2	0.152036
ENSSSCG00000001696	0.151969
ENSSSCG00000006559	0.151959
SMARCB1	0.151958
NSMCE4A	0.15192
CARHSP1	0.151871
TXNL4A	0.15187
TSPAN14	0.151812
LSM3	0.151725
PSMD7	0.151688
DALRD3	0.151593
USP9X	0.151473
NKG7	0.151435
ZBTB18	0.151335
ENSSSCG00000011798	0.151216
PRKAR1A	0.151212
PFKP	0.151175
TTF1	0.151172
RRP15	0.151125
LTO1	0.151124
ENSSSCG00000037187	0.150986
TPST2	0.150979
SMNDC1	0.150948
PPP2R5E	0.150867
CAMLG	0.150865
ATP5F1D	0.150772
ENSSSCG00000007253	0.150699
NXT1	0.150654
BCL10	0.15056
DHRS3	0.15038
ENSSSCG00000016323	0.150238
NPC2	0.150235
SAMM50	0.150213
DLD	0.150176
PHF20L1	0.150043
ACO2	0.149836
PPP1R8	0.149799
MPHOSPH6	0.14963
LDLR	0.149536
MRPL27	0.149397
STK40	0.149327
SSRP1	0.1492
CYB561D2	0.149136
ZBTB20	0.1489
JAK3	0.148802
ESF1	0.148685
UBE2W	0.148635
STX8	0.148487
VAPA	0.148412
BRD9	0.148362
RFTN1	0.148338
HSBP1	0.148269
HYI	0.148267
IRF1	0.148131
[truncated: 12,388 more rows]

## Sheet: 0v3_Permutation
Supplementary File 11. Random forest pair-wise analyses of CD4+ αβ T-cell clusters. For each model represented below the porcine scRNA-seq cluster IDs compared are shown along with the parameters used and resulting OOB prediction error. Variable importance was assigned by measuring node impurity (Impurity) and using permutations (Permutation). Features that reduced error in predictive accuracy ar…
Gene	Permutation
ENSSSCG00000036618	0.0153541
TMSB10	0.0066424
ITGB1	0.00538407
S100A6	0.00464907
GPX1	0.00414699
LTB	0.00394353
COX1	0.0036173
SRGN	0.0035651
S100A4	0.00351204
S100A11	0.00347657
UCP2	0.00334854
RPS3A	0.00301804
IL18R1	0.00282928
S100A10	0.00276808
SAT1	0.0024664
CCR7	0.0023707
RPS16	0.00226756
CD74	0.00173809
ANXA2	0.0017128
COX2	0.00162591
ENSSSCG00000026140	0.00158067
B2M	0.0015158
ARHGDIB	0.00143898
ENSSSCG00000001229	0.00140851
ENSSSCG00000037142	0.00140561
ENSSSCG00000006395	0.00136211
ENSSSCG00000034617	0.00129185
VMP1	0.00127762
RPL35	0.00127295
SELL	0.00122023
ENSSSCG00000011272	0.00118471
ENSSSCG00000035080	0.0010776
CD99	0.00104407
SAMHD1	0.00101094
OSTF1	0.000975811
CD40LG	0.000959934
ENSSSCG00000040273	0.000905701
ANGPT2	0.000902507
CCR4	0.00086752
RPL34	0.000866484
BST2	0.000862699
RPL9	0.00083059
RPS23	0.000822246
RPL23	0.000818907
ENSSSCG00000035507	0.000810963
CST7	0.000803474
ENSSSCG00000003042	0.000791485
RPL6	0.000768563
PLAC8	0.000752817
CD9	0.000732872
LEF1	0.000679569
CD80	0.000678111
EML4	0.000676481
ID2	0.000674949
ENSSSCG00000038351	0.000659148
CTSW	0.000651303
RPL5	0.000631464
ENSSSCG00000011952	0.000627826
RGS10	0.000620773
SUSD3	0.000612955
ENSSSCG00000004489	0.000600648
RPL22	0.000573831
SH3BGRL3	0.000572778
ATP6	0.000562928
RPS5	0.000550642
ENSSSCG00000039544	0.00054287
CXCR3	0.000538225
MYL6	0.000530902
ENSSSCG00000035768	0.000525327
ENSSSCG00000014855	0.000508402
GADD45A	0.000508155
ENSSSCG00000036013	0.000503096
ITGA4	0.000480716
ISG20	0.000474741
ENSSSCG00000032556	0.000472892
CD8A	0.000442879
PLP2	0.000440203
ENSSSCG00000014565	0.000427812
ENSSSCG00000039071	0.000417687
F2R	0.000405696
ENSSSCG00000015447	0.000404436
ENSSSCG00000012119	0.000399092
GZMB	0.000398017
CARD19	0.000397096
HINT1	0.000396099
ENSSSCG00000035811	0.000386275
RPL7	0.000385993
ENSSSCG00000001341	0.000381859
TMEM173	0.000378744
MIF	0.000375529
VIM	0.000370866
COX3	0.000369864
PLXND1	0.000366708
GLIPR2	0.000365675
MISP3	0.000362367
ENSSSCG00000031912	0.0003543
SMAP1	0.000325713
NDFIP2	0.000322733
ENSSSCG00000034448	0.000319916
HLA.DRA	0.000316526
IL6R	0.00031637
RPS21	0.000301816
PTPRCAP	0.000300475
MAF	0.000296176
RPL37	0.000288938
ENSSSCG00000037775	0.000288354
RPL11	0.000283548
ENSSSCG00000020830	0.00027833
ANXA1	0.000269759
ENSSSCG00000033019	0.00026535
ARF6	0.000261309
TPT1	0.000253991
PFN1	0.000253357
VAMP8	0.000250579
ENSSSCG00000025928	0.000243521
RPS13	0.00024257
EEF1B2	0.000236163
ENSSSCG00000024973	0.00023324
PABPC1	0.000229317
DYNLT3	0.000226849
S100A13	0.000219044
ENSSSCG00000000576	0.000217603
ENSSSCG00000031088	0.000213748
RPS17	0.000205559
ITM2B	0.000205305
ENSSSCG00000013597	0.000190899
ENSSSCG00000027573	0.000189102
CD69	0.000187998
SMC4	0.000187195
ENSSSCG00000036114	0.000186644
ENSSSCG00000006418	0.000185532
ENSSSCG00000029596	0.000182034
SLA.DQB1	0.000181761
MNDA	0.000176801
ENSSSCG00000004945	0.000176305
IKZF2	0.000174619
PSMB9	0.000173085
ENSSSCG00000003930	0.000172556
ENSSSCG00000017239	0.000171824
STMN1	0.000166802
TSPO	0.000164669
BTG1	0.000164179
LY96	0.000163163
RPL10	0.000159973
ZNRF1	0.000159889
CALM1	0.000159193
HMGB2	0.000158451
GPX4	0.000158254
RPS26	0.000155868
HSP90AA1	0.000154991
ENSSSCG00000005453	0.0001539
RPS9	0.000151181
GSTA4	0.000150207
ND4	0.000149995
IFITM3	0.000149711
MYO1F	0.000147659
ENSSSCG00000013064	0.000144687
REEP5	0.000143507
GPR183	0.000143072
HSD11B1L	0.000141761
ENSSSCG00000016758	0.000136274
ENSSSCG00000001398	0.000134468
ENSSSCG00000003914	0.000134424
KDM1B	0.000133889
ENSSSCG00000035256	0.000131857
ENSSSCG00000032017	0.000131656
SPCS3	0.000130037
TCF7	0.00012684
CD86	0.000122965
UBC	0.000122811
MT3	0.000122642
ETHE1	0.000118898
LSP1	0.000118498
ENSSSCG00000004666	0.000117375
CD3G	0.000113499
RPS27	0.000113048
ENSSSCG00000036716	0.000109307
ARPC3	0.000109092
DHRS7	0.00010905
STK17B	0.00010859
KLK7	0.000106333
LNPEP	0.000105658
EZR	0.000105412
NME2	0.000102904
RPLP0	0.000101915
ENSSSCG00000012397	0.000100767
HMGN3	0.000100661
ACTG1	0.000100397
2021-09-06	9.96985e-05
ENSSSCG00000032003	9.84126e-05
ENSSSCG00000001779	9.77252e-05
ENSSSCG00000001455	9.68971e-05
MRPL57	9.5768e-05
MYO1G	9.47681e-05
TYMS	9.47339e-05
AHI1	9.46431e-05
CEP164	9.38819e-05
DUSP1	9.337e-05
TMEM50A	9.33373e-05
MRPS25	9.22901e-05
LAPTM5	9.20293e-05
RPLP2	9.1796e-05
FADS3	8.97261e-05
COX6A1	8.86174e-05
ARPC2	8.61885e-05
DDIT4	8.59265e-05
ENSSSCG00000011234	8.56554e-05
CNDP2	8.55139e-05
ENSSSCG00000014540	8.30763e-05
CAPZA1	8.27175e-05
RPS4X	8.24261e-05
RPS14	8.23168e-05
COX6C	8.1687e-05
ENSSSCG00000033733	8.13e-05
C15orf48	8.1232e-05
EMB	8.06265e-05
RABAC1	8.01251e-05
NUCKS1	8.00992e-05
ENSSSCG00000007188	8.00634e-05
ARL4C	7.96327e-05
HSP90AB1	7.91867e-05
ENSSSCG00000012166	7.89851e-05
CCDC50	7.86101e-05
IRF5	7.71866e-05
NFE2L2	7.70671e-05
ZBTB38	7.64306e-05
PTPN4	7.64056e-05
KXD1	7.60321e-05
EIF4A2	7.57748e-05
ENSSSCG00000014569	7.46965e-05
DYRK2	7.36168e-05
ADAM19	7.26784e-05
ENSSSCG00000001456	7.21655e-05
RPS11	7.11475e-05
UBB	7.07184e-05
RAC2	6.99508e-05
GOLPH3L	6.97307e-05
RORA	6.92782e-05
PSIP1	6.92385e-05
PARVG	6.84917e-05
EEF2	6.83085e-05
ENSSSCG00000024974	6.81076e-05
AQP3	6.73296e-05
TMEM50B	6.61141e-05
ENSSSCG00000033697	6.60074e-05
ND1	6.59275e-05
EIF3K	6.5358e-05
CFL1	6.50726e-05
HYPK	6.43518e-05
COX4I1	6.40558e-05
RNF19A	6.39698e-05
ARL4A	6.39405e-05
ENSSSCG00000013366	6.34443e-05
ENSSSCG00000004970	6.33322e-05
BPGM	6.28093e-05
BTF3	6.15837e-05
ENSSSCG00000028485	6.12378e-05
ENSSSCG00000039581	6.02726e-05
ENSSSCG00000022912	5.99523e-05
LMO4	5.89884e-05
TPMT	5.88257e-05
RPS20	5.87164e-05
ENSSSCG00000000657	5.81246e-05
ND2	5.80081e-05
RORC	5.78579e-05
HNRNPLL	5.75706e-05
PARK7	5.73387e-05
LAX1	5.70773e-05
DYNLL1	5.70541e-05
ARPC5L	5.70014e-05
NDUFB10	5.6018e-05
SUMO2	5.58149e-05
HNRNPH1	5.57602e-05
RPL26	5.56084e-05
ENSSSCG00000025499	5.54941e-05
BCAP31	5.53829e-05
RACK1	5.48434e-05
CD247	5.47284e-05
AKAP7	5.45182e-05
ENSSSCG00000038507	5.40268e-05
ENSSSCG00000029830	5.36384e-05
TNFRSF4	5.35841e-05
IPO11	5.32955e-05
RPL39	5.24516e-05
ENSSSCG00000017509	5.24313e-05
EGLN3	5.23591e-05
CAPN1	5.17179e-05
SNRPE	5.14953e-05
CGGBP1	5.13125e-05
ENSSSCG00000035520	5.12133e-05
SFT2D1	5.10727e-05
EMP3	5.10543e-05
SOD1	5.06281e-05
PTPN18	5.05871e-05
ENSSSCG00000002550	5.0475e-05
CCNG1	5.04733e-05
ENSSSCG00000020777	5.04458e-05
RPL27	5.0363e-05
ARPC1B	5.03405e-05
NPM1	5.03002e-05
ENSSSCG00000016262	5.01047e-05
POMP	5.0062e-05
POLR2K	4.99785e-05
COTL1	4.95565e-05
GCNT4	4.92598e-05
STXBP2	4.9062e-05
ENSSSCG00000006830	4.87813e-05
ENSSSCG00000004145	4.86138e-05
GM2A	4.85703e-05
FLI1	4.74099e-05
NFKBIB	4.73272e-05
ENSSSCG00000037030	4.72503e-05
CTSC	4.71556e-05
ERP44	4.7151e-05
CD4	4.69821e-05
TUBA1B	4.68413e-05
ELOC	4.67584e-05
PSMB3	4.65845e-05
NREP	4.59325e-05
CHD3	4.58704e-05
HSPE1	4.53678e-05
ENSSSCG00000010203	4.5249e-05
U2SURP	4.52091e-05
IL2RA	4.51395e-05
ZC3H12D	4.47596e-05
ENSSSCG00000033909	4.43428e-05
SEC61G	4.41271e-05
SRSF2	4.41083e-05
CCT2	4.40467e-05
ENSSSCG00000036296	4.39517e-05
ENSSSCG00000004414	4.39029e-05
ENSSSCG00000016100	4.37804e-05
PRDX6	4.37565e-05
GMFG	4.35976e-05
SRRM2	4.35838e-05
ENSSSCG00000000663	4.29688e-05
HNRNPC	4.26758e-05
FUNDC1	4.26496e-05
UBL3	4.25824e-05
LIMD2	4.23598e-05
CIRBP	4.23189e-05
MAX	4.17464e-05
ENSSSCG00000003691	4.14184e-05
ETS1	4.14114e-05
CLINT1	4.13034e-05
ENSSSCG00000027196	4.11833e-05
ENSSSCG00000033703	4.09935e-05
ENSSSCG00000000905	4.09085e-05
ENSSSCG00000036350	4.08661e-05
ENSSSCG00000016263	4.08455e-05
ENSSSCG00000026064	4.08235e-05
ENSSSCG00000014850	4.07118e-05
POLR2C	4.06547e-05
BABAM2	4.05697e-05
PIK3R1	4.04634e-05
CTSS	4.04543e-05
UQCRQ	4.0398e-05
LGALS1	4.03287e-05
ENSSSCG00000001075	4.03198e-05
STARD4	3.92669e-05
ENSSSCG00000012916	3.90831e-05
ENSSSCG00000014343	3.9004e-05
MFSD10	3.89886e-05
CAST	3.88699e-05
DBI	3.88321e-05
FTL	3.87766e-05
ARHGAP30	3.8773e-05
SURF4	3.83749e-05
PPP1CC	3.83473e-05
DDOST	3.82917e-05
RDX	3.81954e-05
MDFIC	3.80494e-05
TCP1	3.79593e-05
RHEX	3.77121e-05
TUBA4A	3.76937e-05
IL2RB	3.7666e-05
ISCU	3.75077e-05
MAT2A	3.7406e-05
ZFP36	3.73839e-05
TP53INP1	3.73034e-05
YBX3	3.71255e-05
TOB2	3.71227e-05
MAP3K1	3.70834e-05
NUDT21	3.70403e-05
ENSSSCG00000040118	3.70267e-05
SMAD2	3.70156e-05
THYN1	3.64828e-05
CCDC115	3.62166e-05
ENSA	3.61156e-05
HSPA8	3.59884e-05
OAZ1	3.59634e-05
CYBA	3.59629e-05
ALDH3A2	3.5832e-05
HNRNPDL	3.58281e-05
MBNL3	3.57256e-05
RNASEH2B	3.55544e-05
LCP1	3.55539e-05
SRPK2	3.54737e-05
ENSSSCG00000034868	3.53708e-05
ENSSSCG00000034019	3.53162e-05
NSD3	3.50116e-05
CAP1	3.47314e-05
SF3B5	3.46508e-05
HK3	3.44515e-05
PPP1CB	3.4381e-05
TGIF2.RAB5IF	3.43709e-05
RAB5A	3.43396e-05
ABI1	3.43e-05
LRP10	3.42924e-05
SKIL	3.42462e-05
ENSSSCG00000005518	3.42345e-05
ENSSSCG00000027675	3.42217e-05
FLNA	3.41585e-05
CCDC124	3.40842e-05
ARRB2	3.40481e-05
ENSSSCG00000008183	3.40404e-05
SYF2	3.39818e-05
RPL7A	3.39718e-05
ADH5	3.39572e-05
FIP1L1	3.39186e-05
SPTBN1	3.39172e-05
PDCD1LG2	3.3871e-05
MFSD1	3.37838e-05
RHOG	3.37831e-05
AHR	3.37582e-05
ENSSSCG00000003253	3.31071e-05
ABLIM1	3.31006e-05
PPP4R2	3.28258e-05
PRKACB	3.2818e-05
SLC44A2	3.28107e-05
FOS	3.27964e-05
PAXX	3.25638e-05
PNRC1	3.24953e-05
VCL	3.243e-05
KRTCAP2	3.24088e-05
RBM25	3.2382e-05
SMCHD1	3.22184e-05
2021-09-01	3.20918e-05
YY1	3.20198e-05
FAM49B	3.19282e-05
MCRIP1	3.13131e-05
SELENOH	3.13045e-05
LCN2	3.1226e-05
NKTR	3.10485e-05
CPNE3	3.1024e-05
CHD1	3.0978e-05
TAOK2	3.09271e-05
CYCS	3.0658e-05
FAM160B1	3.06543e-05
CYTIP	3.05984e-05
ENSSSCG00000015664	3.05868e-05
TMC6	3.05543e-05
ATP6V1E1	3.02297e-05
ENSSSCG00000020790	2.99666e-05
IFIT1	2.96352e-05
LAT2	2.95838e-05
ZBTB16	2.94854e-05
SEMA4A	2.94526e-05
SNF8	2.94076e-05
PGPEP1	2.93973e-05
TALDO1	2.93969e-05
NUP50	2.93296e-05
C1orf21	2.93099e-05
HSPB1	2.93034e-05
SARNP	2.92859e-05
MAPKAPK3	2.92845e-05
SPTLC2	2.92542e-05
RASGRP2	2.92533e-05
RGS19	2.92064e-05
CIAO1	2.91985e-05
GGA2	2.91381e-05
PHACTR2	2.90963e-05
STAT5B	2.9078e-05
ENSSSCG00000032134	2.90663e-05
MOV10	2.90564e-05
SNW1	2.90542e-05
SMPD1	2.90468e-05
CALHM2	2.90201e-05
FOXN3	2.90141e-05
PSMB10	2.90007e-05
H2AFZ	2.8997e-05
NANS	2.89633e-05
ENSSSCG00000040782	2.89452e-05
ENSSSCG00000000377	2.89356e-05
BAX	2.88824e-05
ENSSSCG00000015499	2.88747e-05
NTAN1	2.85775e-05
EEF1D	2.82825e-05
ARF4	2.81738e-05
ANKRD12	2.81434e-05
COX17	2.8001e-05
DPP4	2.79107e-05
EMC7	2.7909e-05
CNP	2.79064e-05
CBFB	2.78927e-05
COA3	2.78851e-05
PTPN6	2.78496e-05
LSM7	2.78019e-05
DNMT3A	2.77558e-05
ENSSSCG00000009327	2.77138e-05
FAS	2.77073e-05
MEA1	2.76874e-05
RNH1	2.76504e-05
PNISR	2.76412e-05
IL7R	2.76217e-05
ENSSSCG00000006061	2.75883e-05
EIF4B	2.75824e-05
EMILIN2	2.7575e-05
VASP	2.75578e-05
AOAH	2.75449e-05
TRAF1	2.75433e-05
ENSSSCG00000004415	2.75368e-05
SLC4A7	2.74956e-05
CD48	2.74894e-05
CDC42SE1	2.74623e-05
ZNF148	2.7437e-05
NDUFC2	2.74247e-05
TBC1D10C	2.73502e-05
HSPA9	2.73083e-05
BTG2	2.73034e-05
TRAT1	2.72453e-05
IKZF3	2.71668e-05
NDUFA13	2.71606e-05
ACOT13	2.71214e-05
HSPA5	2.66095e-05
TRA2B	2.6382e-05
MTF2	2.63658e-05
NCALD	2.62013e-05
SH3KBP1	2.61878e-05
SAMD9	2.61396e-05
RSL1D1	2.61222e-05
GZMK	2.60645e-05
COQ8B	2.60358e-05
ENSSSCG00000027046	2.60285e-05
ENSSSCG00000002953	2.6017e-05
TAF11	2.60031e-05
CHMP4B	2.59928e-05
NDFIP1	2.59302e-05
TES	2.59034e-05
CPNE1	2.58814e-05
AKR7A2	2.58766e-05
CREB1	2.58644e-05
RNPS1	2.58336e-05
DCUN1D5	2.57881e-05
BUB3	2.57864e-05
LARP7	2.57785e-05
PXK	2.57689e-05
NDUFA6	2.57117e-05
SETX	2.57109e-05
ENSSSCG00000009145	2.57021e-05
HNRNPK	2.55181e-05
ATP5IF1	2.55016e-05
LAPTM4A	2.52991e-05
ZFP36L2	2.49569e-05
SEC11A	2.48381e-05
SLC9A3R1	2.47615e-05
PDK1	2.47054e-05
ESD	2.46176e-05
HLA.DOB	2.46006e-05
TREX1	2.45356e-05
PDLIM7	2.45246e-05
PLEKHA1	2.45001e-05
PRPF4B	2.44813e-05
CCT7	2.44559e-05
CYTB	2.44546e-05
ENSSSCG00000038359	2.4417e-05
GSK3B	2.4417e-05
TTC14	2.43537e-05
ENSSSCG00000004583	2.43532e-05
TUT4	2.43247e-05
CTR9	2.43103e-05
NAGA	2.43018e-05
SLC11A2	2.42746e-05
ARFGAP1	2.41556e-05
SLA.DMA	2.41449e-05
ENSSSCG00000024313	2.41142e-05
TM2D1	2.41073e-05
ENSSSCG00000027790	2.40924e-05
ITM2C	2.40853e-05
SSBP4	2.40436e-05
ENSSSCG00000033653	2.38766e-05
SNRPF	2.38741e-05
PSAP	2.36249e-05
ND5	2.33157e-05
ENSSSCG00000001396	2.32793e-05
SMARCB1	2.32372e-05
GATA3	2.30983e-05
ENSSSCG00000040857	2.30687e-05
HIKESHI	2.30526e-05
ABHD3	2.30231e-05
PPP1R18	2.29992e-05
ENSSSCG00000036483	2.29827e-05
PDE4D	2.29697e-05
ANGPTL1	2.29194e-05
ENSSSCG00000011121	2.28291e-05
HADHB	2.28286e-05
ENSSSCG00000033987	2.28227e-05
ZNF292	2.28147e-05
OPTN	2.28132e-05
RPS10.NUDT3	2.28067e-05
CORO1C	2.27877e-05
DDX21	2.27848e-05
ENSSSCG00000001097	2.27843e-05
HPF1	2.27784e-05
CAPZB	2.27783e-05
HNRNPR	2.27416e-05
TSPAN3	2.27221e-05
BIN1	2.2697e-05
C6orf203	2.26925e-05
PAIP2	2.26584e-05
ATAD1	2.2651e-05
COPS5	2.26371e-05
MIEN1	2.26239e-05
ATG3	2.26049e-05
UBE2G1	2.2598e-05
ENSSSCG00000033734	2.25906e-05
CTNNB1	2.25592e-05
FAM129A	2.2559e-05
SRI	2.25503e-05
PDE3B	2.25367e-05
NAP1L1	2.25298e-05
BLOC1S1	2.25139e-05
P4HB	2.25074e-05
RTCA	2.24707e-05
RPIA	2.24516e-05
FAR2	2.24348e-05
ABHD6	2.2363e-05
ARL6IP1	2.1841e-05
UNC119	2.17344e-05
GPD1	2.1672e-05
ENSSSCG00000003261	2.15842e-05
ENSSSCG00000039046	2.15765e-05
HCST	2.15002e-05
ENSSSCG00000007978	2.15001e-05
HNRNPD	2.14674e-05
SF3B6	2.14562e-05
ENSSSCG00000033500	2.14397e-05
NDUFV2	2.14083e-05
EIF2S1	2.13709e-05
ENSSSCG00000023160	2.13413e-05
VPS28	2.13387e-05
ENSSSCG00000008061	2.1338e-05
MOB3A	2.13304e-05
MFSD14B	2.13211e-05
PPP3CA	2.1321e-05
WASF2	2.13123e-05
ENSSSCG00000015710	2.13007e-05
RANBP6	2.12986e-05
TENT5C	2.1285e-05
PRDX2	2.12698e-05
PELP1	2.1248e-05
DCP2	2.12127e-05
MED25	2.11848e-05
MFSD11	2.11753e-05
PTPN7	2.11644e-05
TRMT112	2.11633e-05
CARM1	2.11557e-05
STIM2	2.11194e-05
NOP58	2.10882e-05
ENSSSCG00000021560	2.10829e-05
POLE3	2.10649e-05
CAB39L	2.10494e-05
DUSP2	2.10305e-05
TWF1	2.10154e-05
ENSSSCG00000040248	2.10084e-05
SCAMP3	2.10026e-05
PPIL4	2.0985e-05
RAP1B	2.09679e-05
LAMTOR3	2.09669e-05
CNBP	2.09646e-05
ENSSSCG00000013889	2.09465e-05
ENSSSCG00000039460	2.09253e-05
CLTA	2.09224e-05
PARP9	2.09052e-05
MAP2K2	2.09006e-05
LSM3	2.08958e-05
ZC3HAV1	2.08765e-05
ENSSSCG00000010056	2.08437e-05
PAFAH1B1	2.08304e-05
YPEL5	2.0817e-05
TPM4	2.08067e-05
SPPL2A	2.07988e-05
TMEM123	2.0772e-05
C1orf74	2.07447e-05
IL10RA	2.07405e-05
TAF15	2.07319e-05
COX7C	2.05962e-05
ENSSSCG00000023331	2.05291e-05
ARID1A	2.03397e-05
IFI6	2.02645e-05
ENO1	2.02144e-05
PFDN4	2.01092e-05
ENSSSCG00000016990	2.00266e-05
UBXN4	2.00259e-05
CDC14A	1.99867e-05
ENSSSCG00000009851	1.99666e-05
ITGB2	1.99342e-05
SMC6	1.9915e-05
ORAI3	1.99086e-05
EPRS	1.97778e-05
PSMA7	1.97532e-05
SNX10	1.97089e-05
SRSF5	1.97075e-05
NFKBIA	1.96939e-05
APMAP	1.96687e-05
ENSSSCG00000007355	1.96589e-05
RPN2	1.96469e-05
TPI1	1.96357e-05
UBE2W	1.96194e-05
PRKCA	1.96118e-05
TOMM7	1.95948e-05
MRPL20	1.95924e-05
PPP4R3A	1.95692e-05
TBC1D20	1.95638e-05
HIST1H1E	1.9561e-05
RCAN3	1.95504e-05
SMIM7	1.95362e-05
CDC26	1.95356e-05
HSPA4	1.95337e-05
HINFP	1.95292e-05
S1PR1	1.95285e-05
HM13	1.95272e-05
VAPB	1.95213e-05
STK26	1.95107e-05
MTIF2	1.95013e-05
RASA1	1.94968e-05
CAMK2G	1.94867e-05
RTF1	1.94622e-05
ENSSSCG00000033757	1.94513e-05
GLMP	1.94505e-05
LTA4H	1.94499e-05
ENSSSCG00000001414	1.94484e-05
ENSSSCG00000016687	1.94084e-05
PTGER4	1.93988e-05
MAD2L1	1.93975e-05
CDK14	1.93762e-05
RCHY1	1.9372e-05
SSB	1.93719e-05
ACAT1	1.93702e-05
ATE1	1.93671e-05
PRXL2A	1.93465e-05
SF3A1	1.93359e-05
ECHDC1	1.93258e-05
NFKB1	1.92974e-05
NXT1	1.92756e-05
FAM78A	1.92663e-05
ZRANB2	1.9229e-05
ALG6	1.92111e-05
ENSSSCG00000020686	1.91911e-05
ENSSSCG00000023792	1.91542e-05
NDUFB8	1.91229e-05
NUDT9	1.91216e-05
CD52	1.91182e-05
NUB1	1.90371e-05
GNAI2	1.90267e-05
ENSSSCG00000009625	1.84177e-05
PTMA	1.82975e-05
ETFA	1.82743e-05
PARP1	1.82636e-05
MDH2	1.8241e-05
CRY1	1.82103e-05
CAPZA2	1.81474e-05
TSC22D4	1.81303e-05
ACP1	1.81155e-05
HUWE1	1.80961e-05
ZNFX1	1.80954e-05
TUBB2B	1.80746e-05
ZAP70	1.80619e-05
ENSSSCG00000037299	1.80548e-05
ANKRD10	1.80532e-05
TBK1	1.80268e-05
CRLF3	1.80133e-05
H2AFJ	1.80006e-05
TIMM9	1.79969e-05
UBLCP1	1.79949e-05
GRN	1.79947e-05
MAP4K2	1.7988e-05
CFAP20	1.79873e-05
CTBP1	1.79776e-05
ENSSSCG00000017940	1.7972e-05
RAB1B	1.79638e-05
MKKS	1.79625e-05
CALCOCO2	1.79542e-05
SBNO2	1.79523e-05
ENSSSCG00000013596	1.79517e-05
YTHDC1	1.7951e-05
SRP14	1.79437e-05
COMMD2	1.79266e-05
BCAT2	1.79251e-05
KIF21B	1.79152e-05
ENSSSCG00000034990	1.79123e-05
SAMM50	1.78925e-05
GPSM3	1.78896e-05
MCC	1.7889e-05
RHEB	1.78786e-05
GTF2H3	1.78643e-05
POLR2G	1.78624e-05
AAMP	1.78577e-05
FAM110D	1.78509e-05
ENSSSCG00000034190	1.78467e-05
NBR1	1.78371e-05
RALY	1.78362e-05
NMT1	1.78346e-05
FBXO34	1.7807e-05
RBM39	1.78045e-05
HMOX2	1.78007e-05
SMIM14	1.77963e-05
RBM5	1.77953e-05
TMED5	1.7789e-05
NIFK	1.77804e-05
UCK1	1.77778e-05
SYNGR2	1.77729e-05
EIF4H	1.77682e-05
GUK1	1.77651e-05
ARCN1	1.77635e-05
PPP4R3B	1.77509e-05
PCF11	1.77153e-05
ST6GALNAC4	1.7709e-05
TMEM263	1.76932e-05
ENSSSCG00000027491	1.76383e-05
PCMT1	1.76367e-05
ENSSSCG00000009633	1.76318e-05
ORAI1	1.75757e-05
ENSSSCG00000011678	1.75666e-05
MALT1	1.74887e-05
HSPD1	1.68085e-05
NDUFB9	1.67681e-05
EIF3D	1.67132e-05
MTSS1	1.66795e-05
PTP4A1	1.66482e-05
INPP4B	1.66276e-05
SRPK1	1.66257e-05
ENSSSCG00000002907	1.65247e-05
ATP5F1A	1.64939e-05
CAPG	1.64917e-05
MTG2	1.64648e-05
CD3E	1.64642e-05
GRK2	1.64549e-05
ELF1	1.64472e-05
ANGEL2	1.64461e-05
NDUFA1	1.64387e-05
FBXL15	1.64324e-05
STX8	1.64247e-05
RBM42	1.64223e-05
DPM1	1.64206e-05
TRIR	1.64186e-05
LYST	1.64167e-05
ENSSSCG00000016226	1.6414e-05
SGCA	1.64136e-05
RHOF	1.64067e-05
DNAJA1	1.64064e-05
ENSSSCG00000024263	1.64037e-05
CALM3	1.64031e-05
USO1	1.63874e-05
ENSSSCG00000010685	1.63803e-05
NDUFS3	1.63441e-05
RBBP4	1.6339e-05
SEC31A	1.6333e-05
HADHA	1.63266e-05
XBP1	1.63264e-05
DCTN3	1.63098e-05
PFKP	1.63046e-05
EAPP	1.63031e-05
DR1	1.62974e-05
TOM1	1.62943e-05
PAK2	1.62888e-05
SAP18	1.62884e-05
PCID2	1.62876e-05
PKN2	1.62849e-05
GBP2	1.62844e-05
ASNA1	1.62779e-05
ENSSSCG00000023584	1.62697e-05
UBE2D2	1.62623e-05
SATB1	1.62618e-05
CUL1	1.62586e-05
COPS6	1.62563e-05
ENSSSCG00000017626	1.62485e-05
CYB5B	1.62443e-05
ENSSSCG00000037431	1.62428e-05
TMEM128	1.62295e-05
CLSTN1	1.62235e-05
AK6	1.6223e-05
RRP36	1.62163e-05
DNASE2	1.62118e-05
MAEA	1.62085e-05
CYLD	1.62047e-05
P3H1	1.61947e-05
NUP98	1.61918e-05
PSMC2	1.61883e-05
ENSSSCG00000014997	1.61814e-05
ZBED5	1.61797e-05
NDUFB2	1.6175e-05
ITK	1.61722e-05
SLC25A24	1.61691e-05
HDAC1	1.61581e-05
PQLC1	1.6158e-05
MMADHC	1.61472e-05
MYBBP1A	1.61159e-05
DMAP1	1.61148e-05
ARHGEF6	1.60979e-05
MPG	1.60942e-05
NDUFAF4	1.60836e-05
LRRC70	1.6077e-05
LGMN	1.60751e-05
DTX2	1.60695e-05
MOSPD3	1.6061e-05
SLC25A39	1.59829e-05
GTF2H5	1.59824e-05
ENSSSCG00000009926	1.59394e-05
ENSSSCG00000018061	1.59264e-05
ENSSSCG00000009788	1.59172e-05
LAMTOR2	1.5883e-05
SCML4	1.58443e-05
MRPL52	1.57694e-05
ENSSSCG00000033721	1.57692e-05
ENSSSCG00000000611	1.50983e-05
DAPL1	1.50814e-05
TLE5	1.49528e-05
ZCCHC2	1.49461e-05
DNAJA2	1.49459e-05
DDX56	1.49285e-05
PPIG	1.48966e-05
GPR171	1.48964e-05
DAZAP1	1.48482e-05
COX5B	1.48366e-05
BCL2A1	1.48272e-05
IL27RA	1.48119e-05
ENSSSCG00000025060	1.48078e-05
THAP7	1.48019e-05
DOCK2	1.47968e-05
PPP6C	1.47953e-05
KDELR1	1.47943e-05
COPA	1.47717e-05
MRPS11	1.4755e-05
FXR1	1.47277e-05
SREBF2	1.47258e-05
KHDRBS1	1.47249e-05
UQCR10	1.47239e-05
F2RL1	1.47187e-05
CD5	1.47132e-05
ELK4	1.47132e-05
ARHGEF3	1.47129e-05
TRPM7	1.4709e-05
ACOT8	1.47017e-05
LBR	1.46976e-05
TRNAU1AP	1.46972e-05
AKIP1	1.4697e-05
SMARCC1	1.46884e-05
DNAJB9	1.46867e-05
NFYC	1.46866e-05
FH	1.46861e-05
RALGPS2	1.4685e-05
UBE2V1	1.46832e-05
IRF7	1.46827e-05
CEBPZOS	1.46744e-05
STAG2	1.46644e-05
TBL1XR1	1.46641e-05
TBL2	1.46619e-05
TTLL12	1.46608e-05
ATL3	1.46605e-05
ENSSSCG00000030002	1.46509e-05
ENSSSCG00000003219	1.46402e-05
NIT2	1.46268e-05
ENSSSCG00000009792	1.46243e-05
CALR	1.46222e-05
ZC3H7B	1.462e-05
ADNP	1.46186e-05
UTRN	1.46109e-05
ENSSSCG00000039618	1.46098e-05
CASC1	1.45865e-05
NRBP1	1.45825e-05
ANAPC13	1.45791e-05
UGP2	1.45725e-05
NT5C2	1.45703e-05
CNN2	1.45638e-05
PRKAA1	1.45491e-05
ENSSSCG00000025253	1.45463e-05
AP2B1	1.45435e-05
CYB561D2	1.45422e-05
SETD2	1.45392e-05
TMEM33	1.45362e-05
MRPS31	1.4536e-05
ENSSSCG00000004349	1.45357e-05
ENSSSCG00000006360	1.45245e-05
ENSSSCG00000008496	1.45218e-05
PIM1	1.45215e-05
H2AFV	1.45163e-05
SAR1B	1.45092e-05
TLNRD1	1.45069e-05
UBE3B	1.4506e-05
ENSSSCG00000039731	1.45032e-05
NFATC2	1.45028e-05
COX11	1.44938e-05
EMC8	1.44884e-05
WAPL	1.44878e-05
LDLRAP1	1.44805e-05
OAZ2	1.44463e-05
ENSSSCG00000016949	1.44239e-05
WDR45	1.44199e-05
MRPL13	1.44119e-05
NAGK	1.43939e-05
ENSSSCG00000008057	1.43738e-05
ZNF330	1.43494e-05
ENSSSCG00000010674	1.43493e-05
TMEM11	1.43484e-05
NARS	1.43482e-05
STAT4	1.43476e-05
SEC61A1	1.43315e-05
BCAS2	1.42679e-05
TIMM17B	1.42594e-05
HTATIP2	1.42516e-05
PNRC2	1.42248e-05
ECHS1	1.42146e-05
ENSSSCG00000033272	1.41824e-05
ENSSSCG00000008433	1.39512e-05
DAD1	1.38546e-05
RPS12	1.37798e-05
DDX5	1.37308e-05
CLEC12A	1.33382e-05
IBA57	1.33289e-05
FAM210B	1.33076e-05
MAP2K3	1.32717e-05
CTSB	1.32618e-05
PI4K2B	1.32575e-05
ZFAND1	1.32403e-05
ESF1	1.32268e-05
ENSSSCG00000014013	1.3218e-05
TAF3	1.32161e-05
CD1D	1.32156e-05
ENSSSCG00000038506	1.32085e-05
TTF2	1.31681e-05
USF1	1.31619e-05
SRSF7	1.31489e-05
BNIP3	1.31368e-05
ENSSSCG00000035048	1.31359e-05
ACYP1	1.31333e-05
GTF2F2	1.31327e-05
ENSSSCG00000001927	1.31203e-05
BROX	1.31115e-05
NRDC	1.31108e-05
DDX27	1.31048e-05
LONP1	1.31044e-05
ASRGL1	1.31042e-05
TAPBPL	1.3101e-05
RPL3	1.3101e-05
TBC1D10B	1.30987e-05
TBC1D10A	1.30978e-05
LAMTOR4	1.30978e-05
ENSSSCG00000009770	1.30952e-05
ATP1A1	1.30905e-05
DPF2	1.30862e-05
CPD	1.30837e-05
P2RY10	1.30766e-05
RAB1A	1.30763e-05
IQGAP2	1.30728e-05
POLR3D	1.30669e-05
ARGLU1	1.30629e-05
SSR4	1.30592e-05
NDUFV3	1.30589e-05
PUS7L	1.30585e-05
PPT1	1.30558e-05
WDR18	1.30526e-05
SGPP2	1.305e-05
ASAP1	1.30406e-05
SAR1A	1.30294e-05
JAK3	1.3023e-05
TIGIT	1.30228e-05
FYN	1.30204e-05
MAP3K12	1.30203e-05
PHYH	1.30156e-05
CASP8	1.30141e-05
MRPL44	1.30111e-05
PYGL	1.30062e-05
PHF3	1.29958e-05
NT5C	1.29902e-05
EXO5	1.29792e-05
ZBTB20	1.29761e-05
DUT	1.29751e-05
ENSSSCG00000011798	1.29747e-05
SAMD12	1.29626e-05
ENSSSCG00000008035	1.29623e-05
CD53	1.2953e-05
WDR44	1.29518e-05
ENSSSCG00000007749	1.295e-05
BLOC1S5	1.29469e-05
ENSSSCG00000007692	1.29441e-05
RILPL2	1.29424e-05
RNF114	1.29389e-05
VPS72	1.29363e-05
PI4KA	1.29333e-05
MTPN	1.29326e-05
DMTF1	1.2931e-05
SDF2L1	1.29265e-05
DNAJC2	1.29249e-05
RNF5	1.29186e-05
CTCF	1.29132e-05
STYX	1.29071e-05
OVCA2	1.29048e-05
ZMYND11	1.28963e-05
SRA1	1.28621e-05
THEMIS	1.28553e-05
DLGAP4	1.28503e-05
EMC2	1.28486e-05
USP9X	1.28465e-05
SDR42E1	1.28326e-05
UBR2	1.28241e-05
STAT1	1.28186e-05
SMIM26	1.28087e-05
ENSSSCG00000033744	1.28075e-05
WASHC3	1.27948e-05
ENSSSCG00000039407	1.27928e-05
RRBP1	1.2784e-05
PSMD7	1.27832e-05
GATAD2A	1.27777e-05
CSDE1	1.27685e-05
TUBB4B	1.27666e-05
ENSSSCG00000007088	1.27605e-05
YKT6	1.2724e-05
IK	1.2719e-05
SLTM	1.27109e-05
FAM177A1	1.27043e-05
ENSSSCG00000003849	1.267e-05
MGST3	1.26696e-05
EBNA1BP2	1.26611e-05
ENSSSCG00000012178	1.25276e-05
DDX17	1.21883e-05
ACTB	1.20934e-05
CD2	1.19441e-05
ITGB7	1.18544e-05
LGALS3BP	1.18001e-05
CENPH	1.17655e-05
CD81	1.17459e-05
ENSSSCG00000004130	1.17435e-05
ENSSSCG00000032311	1.17047e-05
ENSSSCG00000039635	1.16749e-05
CDKN2C	1.16652e-05
SNRPD1	1.16498e-05
DLAT	1.16377e-05
CCT5	1.16318e-05
GOLGA4	1.16316e-05
STAMBPL1	1.16217e-05
PTGER2	1.16039e-05
SIRT7	1.15981e-05
RELCH	1.15941e-05
AIP	1.15728e-05
NUPR1	1.15725e-05
KRCC1	1.15709e-05
TAF4B	1.15389e-05
TMUB1	1.15384e-05
SOD2	1.15383e-05
NAXD	1.1538e-05
CYB5A	1.1537e-05
NAA20	1.15347e-05
ATG12	1.1522e-05
FMNL3	1.15206e-05
ORC6	1.15179e-05
ENSSSCG00000014280	1.15147e-05
SHARPIN	1.15111e-05
CAMK2D	1.15054e-05
ENSSSCG00000021380	1.1503e-05
APP	1.15019e-05
ENSSSCG00000009208	1.15017e-05
DAP3	1.15008e-05
STAT3	1.14969e-05
RNASEH2C	1.14935e-05
SPOCK2	1.14754e-05
ENSSSCG00000031255	1.14734e-05
TSFM	1.14733e-05
COG5	1.14722e-05
TRMT10C	1.14712e-05
CWF19L2	1.14684e-05
RNF122	1.14662e-05
ITGB1BP1	1.14656e-05
FOXN2	1.14647e-05
THRAP3	1.14643e-05
MGMT	1.14624e-05
PDE6D	1.14552e-05
ENSSSCG00000028802	1.14502e-05
TNFSF13B	1.14485e-05
SIVA1	1.14453e-05
MFSD5	1.14451e-05
PARVB	1.14443e-05
METTL26	1.1442e-05
ENSSSCG00000005658	1.14407e-05
EIF3E	1.14397e-05
PALM	1.14395e-05
DAXX	1.14347e-05
FAM173A	1.14326e-05
ENSSSCG00000038719	1.1429e-05
GLCE	1.14261e-05
NFATC1	1.14246e-05
EIF3L	1.14227e-05
HACD4	1.14178e-05
PYM1	1.14174e-05
TANK	1.14174e-05
ATP2A3	1.14152e-05
COPZ1	1.14128e-05
ENSSSCG00000035538	1.14102e-05
ST3GAL2	1.14093e-05
CEP192	1.14024e-05
SNRNP35	1.13998e-05
RNF38	1.13962e-05
MFF	1.13961e-05
ENSSSCG00000025525	1.13934e-05
VTA1	1.13908e-05
CDC5L	1.139e-05
ELP3	1.13883e-05
RSAD2	1.13871e-05
ZDHHC6	1.13804e-05
RNF139	1.13786e-05
PPP2R2A	1.13784e-05
TPM2	1.1377e-05
TMEM41B	1.13736e-05
RFXAP	1.13722e-05
RFTN1	1.13671e-05
TAZ	1.13669e-05
FMC1	1.13657e-05
RFXANK	1.13651e-05
RBM41	1.1363e-05
HSD17B13	1.1363e-05
DIABLO	1.13628e-05
CNOT7	1.13622e-05
PIBF1	1.13612e-05
KATNBL1	1.13533e-05
RAP1GAP2	1.13495e-05
GOLM1	1.13453e-05
CHD9	1.13405e-05
ENSSSCG00000031730	1.13371e-05
MTX2	1.13365e-05
TOR1A	1.13319e-05
ZNHIT6	1.13317e-05
EPS15	1.13286e-05
SYTL1	1.13266e-05
SLC39A10	1.13255e-05
MPHOSPH6	1.13252e-05
CBR4	1.13241e-05
JADE1	1.13226e-05
ATF4	1.13184e-05
CNOT8	1.13174e-05
CLK4	1.1317e-05
WDR12	1.13151e-05
DECR1	1.13118e-05
TOMM34	1.13068e-05
RAB3GAP2	1.13062e-05
EIF1B	1.13057e-05
PARP14	1.1304e-05
ENSSSCG00000016441	1.13034e-05
MGA	1.13028e-05
POLDIP3	1.12953e-05
ENSSSCG00000032459	1.12915e-05
RASSF7	1.12914e-05
DOCK8	1.12908e-05
LEPROT	1.12839e-05
ENSSSCG00000011506	1.12789e-05
FAAP24	1.12775e-05
THOC2	1.12743e-05
DERL1	1.12719e-05
TMEM19	1.1269e-05
FKBP8	1.12677e-05
EIF2AK3	1.12647e-05
TRPV5	1.12637e-05
FBXO3	1.1259e-05
CLK3	1.12587e-05
TAC4	1.12548e-05
PTPRA	1.12494e-05
REST	1.12473e-05
IAH1	1.12472e-05
ENSSSCG00000031342	1.12468e-05
ENSSSCG00000035611	1.12447e-05
SLC38A2	1.1232e-05
ENSSSCG00000008576	1.12317e-05
TRPV2	1.12252e-05
ENSSSCG00000016376	1.12164e-05
IFT80	1.12044e-05
NRROS	1.12032e-05
ENSSSCG00000021427	1.11935e-05
ENSSSCG00000035650	1.11934e-05
RAB24	1.11836e-05
ACTR1A	1.11816e-05
NGDN	1.11747e-05
PTDSS1	1.11732e-05
ENSSSCG00000024696	1.1173e-05
DNAJB14	1.11647e-05
SS18L2	1.11566e-05
CLNS1A	1.11545e-05
KIF2A	1.11538e-05
BMF	1.10885e-05
PSMB4	1.02634e-05
TNIP1	1.01364e-05
TMED7	1.00915e-05
WDR37	1.00496e-05
PPP2CA	1.00293e-05
MORF4L1	1.00236e-05
SEC24D	9.99525e-06
HSD17B8	9.97985e-06
TNFSF10	9.97326e-06
ENSSSCG00000002036	9.96987e-06
RASSF3	9.94697e-06
NR1D2	9.94466e-06
KIN	9.93681e-06
POLM	9.92771e-06
STX12	9.92496e-06
DNMT1	9.92121e-06
RUNX1	9.92055e-06
NUMA1	9.91529e-06
SFT2D2	9.91036e-06
WTAP	9.89814e-06
ENSSSCG00000017032	9.89685e-06
TPD52L2	9.89675e-06
SERHL2	9.88738e-06
SNX3	9.88193e-06
GCN1	9.88078e-06
SYNCRIP	9.8766e-06
ZNF317	9.86737e-06
MATK	9.8668e-06
SUMF1	9.86588e-06
KCNJ13	9.85774e-06
ATXN2	9.85528e-06
AATF	9.85508e-06
TRIB2	9.8519e-06
CADM4	9.84687e-06
ENSSSCG00000038581	9.84406e-06
KDSR	9.83966e-06
ZBTB18	9.83658e-06
UBE2D3	9.83634e-06
NUBP2	9.83381e-06
CYBC1	9.82617e-06
AP1G2	9.8247e-06
COA4	9.82277e-06
FBXO11	9.82117e-06
API5	9.81997e-06
CSRNP1	9.81932e-06
KLHDC2	9.81922e-06
ZFR2	9.81825e-06
ENSSSCG00000000185	9.81747e-06
THOC6	9.81603e-06
AUH	9.81561e-06
DUSP23	9.81327e-06
NGRN	9.81131e-06
NDUFA11	9.80704e-06
BRD9	9.80699e-06
WDR48	9.80686e-06
COQ2	9.80239e-06
BCS1L	9.79922e-06
ENSSSCG00000002529	9.79775e-06
ENSSSCG00000013568	9.797e-06
ENSSSCG00000021941	9.79661e-06
ENSSSCG00000029251	9.79577e-06
TFRC	9.79197e-06
NUDT22	9.79136e-06
TXNL1	9.7902e-06
PATL1	9.78902e-06
ANXA11	9.78879e-06
OGFOD3	9.78843e-06
BDP1	9.7838e-06
PLAAT3	9.78022e-06
PUM2	9.77931e-06
ASPA	9.778e-06
ENSSSCG00000035856	9.77616e-06
TRPC4AP	9.77324e-06
MRPL55	9.77184e-06
TAMM41	9.77056e-06
TAF7	9.77017e-06
BAD	9.76977e-06
RASSF1	9.76694e-06
BUD23	9.76601e-06
CD38	9.76475e-06
2021-03-02	9.7645e-06
PPP4R1	9.76439e-06
ENSSSCG00000035209	9.76416e-06
MTCH1	9.76205e-06
SUSD6	9.75665e-06
ENSSSCG00000006382	9.75503e-06
PVRIG	9.75316e-06
CRADD	9.75312e-06
ADRM1	9.75232e-06
OXA1L	9.75062e-06
RAE1	9.74929e-06
CINP	9.74827e-06
TNPO2	9.74826e-06
ZNF689	9.74817e-06
ENSSSCG00000040060	9.73956e-06
NOB1	9.73914e-06
ERMP1	9.73693e-06
ENSSSCG00000006156	9.73632e-06
GHDC	9.73578e-06
CCDC32	9.73503e-06
TAF9B	9.73387e-06
XPO1	9.73065e-06
PLEKHA2	9.72927e-06
NTPCR	9.72909e-06
KCTD20	9.72542e-06
UBE4A	9.72159e-06
NENF	9.72075e-06
ZNF282	9.71932e-06
PHF14	9.71852e-06
FGL2	9.71838e-06
GMEB1	9.71716e-06
ENSSSCG00000026446	9.7162e-06
TMEM87B	9.71556e-06
VPS11	9.7142e-06
COMMD4	9.71219e-06
TGFB1	9.70761e-06
ENSSSCG00000038754	9.7075e-06
SCAPER	9.70583e-06
MEX3C	9.70541e-06
ANAPC5	9.70472e-06
ENSSSCG00000036115	9.70448e-06
THOC5	9.70386e-06
CDPF1	9.70256e-06
LPP	9.69995e-06
SNX4	9.69748e-06
OXCT1	9.69612e-06
ENSSSCG00000009241	9.69476e-06
CA5B	9.69439e-06
TC2N	9.69382e-06
LEO1	9.69015e-06
ICAM2	9.68968e-06
ANAPC15	9.68826e-06
DEDD	9.6872e-06
ZNF827	9.68669e-06
XPOT	9.68057e-06
TASOR	9.67099e-06
LTO1	9.67022e-06
FDX1	9.66858e-06
PLAGL1	9.66776e-06
C7orf50	9.66231e-06
SLC16A3	9.65721e-06
DNAJC17	9.65411e-06
HCLS1	9.65259e-06
ENSSSCG00000017749	9.65233e-06
EXOC7	9.65134e-06
YWHAZ	9.65044e-06
CENPC	9.64886e-06
PPP1R12A	9.64712e-06
DNTTIP2	9.64486e-06
DBR1	9.64273e-06
SPATA2	9.64201e-06
RALBP1	9.63291e-06
ARHGAP18	9.63181e-06
NAA60	9.63175e-06
LMF1	9.62645e-06
NKX3.1	9.6219e-06
SKI	9.61715e-06
SMARCA5	9.6138e-06
ZNF135	9.60869e-06
ZNF622	9.60541e-06
ARHGAP25	9.60504e-06
DONSON	9.59824e-06
MRPL54	9.58977e-06
CCND2	9.58964e-06
TMEM60	9.58064e-06
PPIP5K2	9.57735e-06
BRIX1	9.57425e-06
SDC4	9.57172e-06
RPH3AL	9.5699e-06
INO80	9.5691e-06
TXNDC12	9.56586e-06
FLT3LG	9.56378e-06
YAE1	9.56214e-06
CTDP1	9.54766e-06
DBNL	9.54253e-06
CDK9	9.53658e-06
GSPT1	9.53168e-06
NUAK2	9.52274e-06
HAUS1	9.51944e-06
ENSSSCG00000014969	9.51028e-06
ENSSSCG00000040827	9.49899e-06
RBM12B	9.4957e-06
ILK	9.49233e-06
SH3BGRL	9.48775e-06
ENSSSCG00000017248	9.482e-06
PTK2B	9.46831e-06
DKC1	9.46831e-06
DUSP16	9.44003e-06
BNIP2	9.41603e-06
ATP5F1C	9.39897e-06
SNX12	9.39782e-06
ENSSSCG00000012757	9.35545e-06
GNA15	9.32074e-06
NOL9	9.29952e-06
PKN1	8.61554e-06
FCF1	8.60902e-06
CDC123	8.60426e-06
SPG21	8.50288e-06
DDX39B	8.48071e-06
SLA.DMB	8.47062e-06
GEMIN4	8.46148e-06
ENSSSCG00000010734	8.45046e-06
RNF166	8.42034e-06
B9D1	8.40788e-06
DPY30	8.37696e-06
JMJD6	8.37351e-06
LLGL1	8.36854e-06
ATP5PF	8.36801e-06
PCOLCE	8.36462e-06
SLC35B1	8.34096e-06
METTL8	8.33487e-06
GCHFR	8.33228e-06
ZNF644	8.32004e-06
ERMARD	8.31831e-06
FABP3	8.30138e-06
CD47	8.30058e-06
PARP11	8.29744e-06
NDUFAF8	8.29527e-06
SYNRG	8.28978e-06
UBASH3B	8.28136e-06
ANKFY1	8.27947e-06
SLC1A4	8.27873e-06
SPEN	8.27757e-06
POLG	8.2736e-06
TIMM8A	8.27166e-06
LBH	8.26838e-06
SH3GLB1	8.26544e-06
MICU2	8.26072e-06
TOR4A	8.25881e-06
LYSMD2	8.25684e-06
ACSS1	8.25242e-06
PUS1	8.25175e-06
ENSSSCG00000010517	8.25092e-06
MED13	8.24818e-06
CYTH1	8.24282e-06
GPCPD1	8.24118e-06
SLC37A1	8.23998e-06
STAT2	8.23976e-06
USP16	8.23834e-06
PLAA	8.2381e-06
UPK3A	8.23669e-06
TNIK	8.2361e-06
APIP	8.23423e-06
ITFG1	8.23117e-06
ENSSSCG00000027374	8.2302e-06
GUF1	8.22942e-06
CCDC127	8.22847e-06
EFL1	8.22816e-06
MSANTD4	8.22811e-06
NR3C1	8.22374e-06
NFRKB	8.22224e-06
SLF1	8.22217e-06
KMT2C	8.22153e-06
DIPK1A	8.22022e-06
TMED10	8.21919e-06
VPS35	8.21482e-06
2021-09-09	8.21481e-06
SCAP	8.21434e-06
HELZ	8.21242e-06
ACTR6	8.21161e-06
BEX3	8.21114e-06
ENSSSCG00000014618	8.21085e-06
PHF21A	8.21017e-06
PHC2	8.20819e-06
CLPTM1L	8.2078e-06
ZFP62	8.20747e-06
FAM3C	8.20742e-06
SIPA1L1	8.20502e-06
TPRA1	8.20494e-06
STK38L	8.20349e-06
TP53I13	8.20257e-06
IQCE	8.20078e-06
ATOX1	8.19947e-06
PSMD11	8.19925e-06
CBX1	8.198e-06
MTMR4	8.1978e-06
AP1M1	8.19643e-06
WDFY2	8.1923e-06
PAFAH1B3	8.1908e-06
XRCC1	8.18991e-06
TMC8	8.18922e-06
SH3BP5	8.18911e-06
LPGAT1	8.18609e-06
ADCK5	8.18609e-06
BACH2	8.18586e-06
METTL1	8.18465e-06
SSR3	8.18349e-06
KIAA0319L	8.18085e-06
ENSSSCG00000008236	8.18001e-06
PPP5C	8.17462e-06
MRRF	8.17056e-06
FIG4	8.16903e-06
MTHFD2	8.16896e-06
RIT1	8.16817e-06
PPP1R10	8.16589e-06
GATD1	8.16529e-06
CASP10	8.15941e-06
BLOC1S6	8.15808e-06
HNRNPA3	8.15786e-06
KLRK1	8.15686e-06
ZNF687	8.15407e-06
ASH1L	8.15308e-06
MRPL34	8.15233e-06
SLC12A6	8.15175e-06
ST6GALNAC2	8.14906e-06
TMEM38B	8.14885e-06
ENSSSCG00000036603	8.1484e-06
NBEAL2	8.14747e-06
REL	8.14744e-06
IFIH1	8.14693e-06
DDX55	8.14677e-06
UBQLN2	8.14675e-06
LPCAT2	8.14382e-06
KIF3A	8.14264e-06
WDR75	8.14155e-06
GOLIM4	8.1415e-06
STRN3	8.14023e-06
PUS7	8.13884e-06
RMDN1	8.13703e-06
NCAPH2	8.13553e-06
ENSSSCG00000021738	8.13552e-06
C16orf91	8.13536e-06
ENSSSCG00000011567	8.13474e-06
PSPC1	8.13414e-06
TM2D3	8.13274e-06
CNOT6L	8.1327e-06
CPSF2	8.13201e-06
CLP1	8.13157e-06
BNIP3L	8.13081e-06
VAPA	8.13079e-06
DBT	8.13032e-06
NUP43	8.12768e-06
CCDC130	8.12729e-06
GSTZ1	8.1262e-06
RNPEP	8.12556e-06
GLRX3	8.12424e-06
MCOLN2	8.12279e-06
PEX12	8.12249e-06
FRS2	8.12241e-06
RNF20	8.1217e-06
GNA13	8.12076e-06
STAU1	8.11978e-06
ADGRL1	8.11947e-06
TMEM87A	8.11907e-06
SMPD2	8.11715e-06
SLC26A6	8.11525e-06
TFDP2	8.11486e-06
C21orf91	8.11407e-06
NAXE	8.11238e-06
ENSSSCG00000020963	8.1122e-06
TMEM192	8.11174e-06
EMC6	8.11162e-06
NUCB1	8.10681e-06
CHCHD4	8.1062e-06
BTF3L4	8.10549e-06
PGM2	8.1053e-06
AURKAIP1	8.10477e-06
RABEP2	8.10452e-06
ENSSSCG00000025316	8.10408e-06
RFK	8.10287e-06
ENSSSCG00000025203	8.10286e-06
RASAL3	8.10283e-06
CISH	8.10154e-06
ACOT4	8.09903e-06
D2HGDH	8.0983e-06
HBS1L	8.09755e-06
C12orf43	8.0975e-06
OXSM	8.09729e-06
TIMP1	8.0964e-06
DNAJB2	8.09632e-06
LRRC75A	8.09571e-06
GIGYF2	8.09441e-06
IVNS1ABP	8.09428e-06
FOXK1	8.09249e-06
EIF4G2	8.08772e-06
NUDT16L1	8.08748e-06
PSME4	8.08705e-06
ZNF239	8.08582e-06
ATP5ME	8.08493e-06
NFYB	8.08482e-06
TMLHE	8.08411e-06
PRMT3	8.08335e-06
CFAP54	8.08278e-06
SF3A3	8.08163e-06
TESPA1	8.08099e-06
IP6K1	8.08017e-06
ENSSSCG00000015814	8.07849e-06
ENSSSCG00000003771	8.07712e-06
SYVN1	8.07685e-06
MAPK1IP1L	8.07621e-06
ACBD4	8.07198e-06
ZNF358	8.07103e-06
TARS2	8.06936e-06
ITGA5	8.06923e-06
ENSSSCG00000032918	8.06856e-06
RMND1	8.06852e-06
BFAR	8.0679e-06
ARHGEF2	8.06732e-06
SETD7	8.06362e-06
PRELID2	8.06068e-06
RASA2	8.05992e-06
BCL10	8.05869e-06
SLC38A9	8.05802e-06
TIMM29	8.05285e-06
STK40	8.05273e-06
C1orf174	8.05264e-06
ENSSSCG00000037251	8.04681e-06
RASGRP1	8.04595e-06
MLXIP	8.04399e-06
MYO19	8.04373e-06
WASHC4	8.04355e-06
RABL3	8.04334e-06
RABEP1	8.0418e-06
RTTN	8.04097e-06
ARL5B	8.03862e-06
GNPDA1	8.03696e-06
GOLGB1	8.0359e-06
TXNDC15	8.03315e-06
CAPRIN2	8.033e-06
SLCO4C1	8.03213e-06
DGUOK	8.03159e-06
NRBF2	8.03151e-06
TCEA2	8.03118e-06
GTF3C3	8.0283e-06
RAB3A	8.01943e-06
PDCD4	8.01775e-06
EXOC3	8.01628e-06
ELK1	8.01573e-06
YAF2	8.01152e-06
RAB22A	8.00867e-06
PROSER1	8.00834e-06
ENSSSCG00000013900	8.00717e-06
FBXL12	8.00688e-06
WDR46	8.00677e-06
NUDC	8.00303e-06
CASP8AP2	8.00147e-06
ACAT2	8.00019e-06
SNAP23	7.99898e-06
MTX1	7.99887e-06
CXXC1	7.99837e-06
ENSSSCG00000007253	7.99663e-06
CNOT10	7.99542e-06
ARMCX3	7.99362e-06
TCERG1	7.99183e-06
TECR	7.98797e-06
MAP7D1	7.987e-06
GPATCH4	7.98312e-06
FAM172A	7.98164e-06
DNAJC7	7.97356e-06
SIRT5	7.97001e-06
RPS6KA1	7.9699e-06
VTI1B	7.9699e-06
IFI44L	7.96755e-06
REEP4	7.96728e-06
ELMO2	7.96699e-06
GGPS1	7.96545e-06
TMEM160	7.965e-06
SPRYD7	7.96181e-06
SPTSSA	7.96175e-06
ENSSSCG00000027085	7.96152e-06
POLD3	7.96073e-06
NAA15	7.95484e-06
ALG13	7.95006e-06
UAP1	7.94093e-06
MYD88	7.94049e-06
ENSSSCG00000027723	7.94037e-06
C12orf10	7.93479e-06
GPAA1	7.93406e-06
ZNF395	7.93022e-06
RNF34	7.91902e-06
SENP6	7.91336e-06
HSPA14	7.9118e-06
ANKRD33B	7.90863e-06
NOSIP	7.90689e-06
FAM43A	7.89588e-06
PIN4	7.89251e-06
PDIA3	7.87666e-06
SLBP	7.87181e-06
PLCL2	7.83413e-06
SON	7.82867e-06
TIMM8B	7.82813e-06
ENSSSCG00000034709	7.82487e-06
FLOT1	7.81952e-06
EIF3I	7.81063e-06
SLC25A6	7.81018e-06
AP3B1	7.79756e-06
CNPY2	7.76692e-06
EVL	7.743e-06
ISG15	7.66126e-06
PRR7	7.21413e-06
ENSSSCG00000032073	6.94862e-06
ENSSSCG00000009341	6.94665e-06
RCSD1	6.85319e-06
GIPC1	6.84239e-06
SUMO1	6.81819e-06
MED31	6.80887e-06
TESC	6.79619e-06
ZNRD2	6.77917e-06
PPP2R5A	6.76553e-06
AKR1A1	6.75155e-06
FNBP4	6.74737e-06
VPS26C	6.74522e-06
ENSSSCG00000036379	6.73337e-06
RIOX2	6.72943e-06
ARHGAP1	6.71816e-06
LPCAT3	6.69836e-06
IRF3	6.69255e-06
CAT	6.68862e-06
FNTA	6.68533e-06
CEP78	6.68087e-06
JAK1	6.68018e-06
DUSP28	6.67961e-06
ZFY	6.66754e-06
ENSSSCG00000026960	6.66695e-06
HAUS6	6.65975e-06
BAZ1B	6.65736e-06
ENSSSCG00000038900	6.65683e-06
USP45	6.65212e-06
MIB1	6.6521e-06
TRAPPC12	6.65131e-06
OXSR1	6.65015e-06
NDUFS2	6.64998e-06
BOD1L1	6.64993e-06
PSMA4	6.63431e-06
CCNB1IP1	6.63385e-06
KATNA1	6.6317e-06
ENSSSCG00000006628	6.62361e-06
SUOX	6.62342e-06
DAPP1	6.62273e-06
ENSSSCG00000037979	6.62264e-06
DOC2A	6.62228e-06
PITHD1	6.62094e-06
ENSSSCG00000021815	6.6186e-06
TIMM10	6.61398e-06
COMMD5	6.61328e-06
ADPRHL2	6.61192e-06
VIPAS39	6.61157e-06
ENSSSCG00000029160	6.61017e-06
CHST11	6.60926e-06
MEN1	6.60783e-06
TEX30	6.60577e-06
SFXN4	6.60491e-06
HIPK1	6.60344e-06
CDK7	6.60318e-06
DTYMK	6.59945e-06
SLC12A2	6.5994e-06
CCNT1	6.59897e-06
RPAIN	6.59794e-06
CCNH	6.59727e-06
RPS6KA4	6.59668e-06
MBIP	6.59666e-06
GAK	6.5946e-06
C6orf89	6.59358e-06
ENSSSCG00000010172	6.59219e-06
HEBP1	6.58993e-06
RASSF5	6.58977e-06
TAF13	6.58865e-06
RAF1	6.58523e-06
MCM5	6.58481e-06
HBP1	6.58362e-06
YIPF3	6.5833e-06
CMAS	6.58316e-06
ENSSSCG00000004556	6.58027e-06
HSD17B7	6.57939e-06
TSR3	6.57566e-06
NDUFA9	6.57515e-06
PHC3	6.57471e-06
NIT1	6.5738e-06
FOXO1	6.57369e-06
HTD2	6.57277e-06
UPF1	6.56922e-06
GTPBP8	6.56883e-06
PTRH2	6.56814e-06
NR1D1	6.56592e-06
SACM1L	6.56588e-06
TXLNG	6.56586e-06
KDELR2	6.56523e-06
HERC4	6.56437e-06
PMF1	6.56414e-06
CNEP1R1	6.56322e-06
POU2F2	6.56296e-06
VAV1	6.56267e-06
TNNI2	6.56254e-06
NUDT3	6.56239e-06
SLA2	6.56006e-06
QARS	6.55968e-06
XPA	6.55827e-06
ZNF428	6.55755e-06
NKIRAS1	6.55738e-06
RP9	6.55534e-06
RICTOR	6.55342e-06
CORO1B	6.55332e-06
CCDC61	6.5532e-06
CHIC1	6.55297e-06
ENSSSCG00000037054	6.5493e-06
GSPT2	6.54906e-06
ENSSSCG00000037098	6.54882e-06
LRCH3	6.54758e-06
MRPS6	6.54683e-06
FBXO21	6.5446e-06
SLC9A9	6.5431e-06
ZNF793	6.54289e-06
GDI2	6.54267e-06
MED30	6.54212e-06
CEP83	6.54165e-06
ENSSSCG00000038963	6.5409e-06
JADE2	6.54086e-06
TSPAN13	6.54047e-06
EPM2AIP1	6.54e-06
ZNF234	6.53891e-06
ENSSSCG00000003236	6.53824e-06
COL17A1	6.53717e-06
VCAN	6.53661e-06
ZBTB8OS	6.53537e-06
GADD45GIP1	6.53418e-06
DNAJC13	6.53392e-06
BAZ2A	6.53372e-06
CCDC84	6.53332e-06
GTF2F1	6.53207e-06
SLC35F2	6.53187e-06
SKIV2L	6.53177e-06
CDKAL1	6.53125e-06
CDK6	6.53093e-06
PLSCR3	6.53041e-06
CBX6	6.52976e-06
ENSSSCG00000016096	6.52769e-06
LYPLAL1	6.52752e-06
FUBP3	6.5275e-06
PFKFB4	6.52707e-06
SLC7A1	6.52681e-06
RUNX3	6.5265e-06
PRMT9	6.52606e-06
LCORL	6.52491e-06
ENSSSCG00000017352	6.52407e-06
TMEM107	6.52359e-06
FAM45A	6.52158e-06
GRIPAP1	6.52022e-06
CBL	6.51774e-06
GRB2	6.51771e-06
ELP6	6.51762e-06
UROS	6.51748e-06
CENPE	6.51746e-06
DERPC	6.5159e-06
ENSSSCG00000016531	6.51523e-06
CTNNBIP1	6.51451e-06
GMPS	6.51395e-06
XRCC5	6.51222e-06
PABPN1	6.51218e-06
DNAJC25	6.51197e-06
TMEM150B	6.51075e-06
DNAJB1	6.51031e-06
ACSL3	6.50974e-06
TMEM245	6.50967e-06
CSNK1A1	6.50953e-06
TAF8	6.50886e-06
DFFB	6.50798e-06
TM2D2	6.50787e-06
IRAK2	6.50738e-06
NCK2	6.50738e-06
ARHGAP17	6.50665e-06
LSM8	6.50596e-06
TOP2B	6.50485e-06
JAKMIP1	6.5036e-06
ENSSSCG00000034211	6.5021e-06
IPMK	6.50038e-06
PUM1	6.50022e-06
ENSSSCG00000037655	6.49988e-06
PIP4P1	6.49976e-06
FUT8	6.49911e-06
YEATS2	6.49848e-06
VPS26B	6.49838e-06
NOP9	6.49764e-06
NDUFS5	6.49722e-06
ENSSSCG00000021591	6.4972e-06
CREB3	6.49701e-06
PHRF1	6.49578e-06
ENSSSCG00000006984	6.49544e-06
ENSSSCG00000012523	6.49515e-06
ITM2A	6.49414e-06
ENSSSCG00000036604	6.49408e-06
RESF1	6.49407e-06
ZNF609	6.49384e-06
TAF1A	6.49367e-06
PANX1	6.49365e-06
TSC22D3	6.49305e-06
ENSSSCG00000003278	6.49295e-06
OGN	6.49266e-06
XPO4	6.49254e-06
PPIH	6.49135e-06
EIF2AK4	6.48887e-06
ZNF789	6.48842e-06
ZNF512	6.48814e-06
FKBP4	6.48791e-06
PSMD1	6.48788e-06
MTMR14	6.48711e-06
MRPL48	6.48643e-06
ZNF512B	6.48635e-06
PWWP3A	6.48629e-06
DENND3	6.4862e-06
ENSSSCG00000006919	6.48587e-06
BATF	6.48548e-06
PTGES2	6.48548e-06
TTC38	6.48533e-06
ENSSSCG00000005643	6.48453e-06
TRIM8	6.48347e-06
BAG6	6.48339e-06
SNRPA	6.4833e-06
ASB13	6.4832e-06
CXCL10	6.48319e-06
LACTB2	6.48309e-06
TTYH3	6.48298e-06
[truncated: 12,388 more rows]

## Sheet: 0v4_Impurity
Supplementary File 11. Random forest pair-wise analyses of CD4+ αβ T-cell clusters. For each model represented below the porcine scRNA-seq cluster IDs compared are shown along with the parameters used and resulting OOB prediction error. Variable importance was assigned by measuring node impurity (Impurity) and using permutations (Permutation). Features that reduced error in predictive accuracy ar…
Gene	Impurity
ENSSSCG00000036618	35.2314
TMSB10	28.2085
COX1	24.6454
S100A11	22.34
S100A6	22.2274
S100A4	21.656
RPS3A	20.7681
GPX1	20.4667
S100A10	19.6481
ENSSSCG00000037142	18.9762
RPS16	18.0171
ITGB1	17.1113
UCP2	15.3794
CCR7	14.9242
ENSSSCG00000034617	14.8086
CD74	13.9285
COX2	13.4111
ENSSSCG00000003042	13.1176
ANXA2	13.0039
RPL35	12.0503
SRGN	11.5049
ENSSSCG00000014855	10.9957
RPL6	10.1809
RPL23	9.96872
CD99	9.83974
ENSSSCG00000011272	9.8223
RPL34	9.78998
ENSSSCG00000040273	9.37773
SAT1	9.29515
ENSSSCG00000039544	9.02414
ENSSSCG00000035768	8.62825
ARHGDIB	8.39714
VMP1	8.39685
ENSSSCG00000035080	8.1892
ENSSSCG00000003930	7.93224
BST2	7.89938
MYL6	7.84317
RPL9	7.62062
SELL	7.1145
RPL7	6.8798
RPS27	6.69575
ENSSSCG00000006395	6.41458
COX3	6.38157
ENSSSCG00000004489	6.31082
RPL5	6.30444
RPS23	6.02973
ACTG1	5.93056
ISG20	5.55325
PLAC8	5.3724
HLA.DRA	5.11824
SH3BGRL3	5.02179
ENSSSCG00000035811	4.94626
SLA.DQB1	4.79594
BTG1	4.73957
OSTF1	4.70666
IKZF2	4.70495
LSP1	4.63553
RPS15	4.62445
IL18R1	4.51029
LGALS1	4.46913
B2M	4.38683
ATP6	4.3612
LEF1	4.34705
ENSSSCG00000031088	4.29839
ENSSSCG00000014565	4.22002
RPL11	4.17684
RPS5	4.15226
ENSSSCG00000026140	4.05227
PABPC1	4.03388
PFN1	4.01961
HSD11B1L	3.95113
RDX	3.94822
C15orf48	3.94766
ARPC3	3.90109
VIM	3.90003
EML4	3.89631
RPL37	3.71509
ENSSSCG00000001229	3.69979
ENSSSCG00000001455	3.61833
ENSSSCG00000001341	3.57924
ENSSSCG00000005453	3.55605
CST7	3.54373
ENSSSCG00000025928	3.53712
ENSSSCG00000039071	3.50063
RPS13	3.49377
MYO1F	3.48205
RPL22	3.44531
HINT1	3.38229
ARF6	3.33796
ENSSSCG00000024973	3.32771
ENSSSCG00000033019	3.2371
F2R	3.21401
ENSSSCG00000038351	3.16786
CD8A	3.11395
EEF1B2	3.10406
SAMHD1	3.01573
CTSW	2.89813
IFI6	2.82009
ACTB	2.81885
ENSSSCG00000032556	2.73221
ENSSSCG00000027573	2.7161
TCF7	2.70108
LAPTM5	2.58169
DUT	2.57412
CCR4	2.53217
RGS10	2.531
PLP2	2.52269
ENSSSCG00000004970	2.51776
ENSSSCG00000012119	2.50794
TRAT1	2.49889
ENSSSCG00000011952	2.47409
RPS11	2.45889
RPS18	2.42588
ENSSSCG00000000576	2.38068
RPL10	2.37132
RPL17.C18orf32	2.37039
CXCR3	2.32331
RPS6	2.25939
ENSSSCG00000024974	2.24991
ENSSSCG00000035507	2.18605
RPL39	2.14111
RPS9	2.12986
PTPRCAP	2.11927
S100A13	2.10288
ENSSSCG00000014569	2.09861
ENSSSCG00000013597	2.09258
ENSSSCG00000037775	1.9898
EIF4A2	1.97388
RPLP0	1.96707
HMGB2	1.94511
ENSSSCG00000004945	1.92137
EMB	1.90702
TSPO	1.89358
ENSSSCG00000013064	1.8911
ENSSSCG00000001456	1.88708
LTB	1.87443
RPS14	1.85372
TPT1	1.82091
CALM1	1.80799
RPS21	1.79473
STMN1	1.76025
ENSSSCG00000017239	1.74663
CAPG	1.74245
ENSSSCG00000036013	1.71688
MT3	1.71586
ENSSSCG00000006081	1.65411
ENSSSCG00000033697	1.64398
ENSSSCG00000029596	1.63326
CD69	1.61493
ARPC5L	1.60809
CYTB	1.59101
RACK1	1.58239
LY96	1.57253
RPS4X	1.56544
ENSSSCG00000009303	1.55804
FLNA	1.5567
ENSSSCG00000035256	1.51551
ITGA4	1.50869
AQP3	1.47982
PSMB9	1.45898
ENSSSCG00000020830	1.44546
ENSSSCG00000033721	1.41312
KXD1	1.41082
GZMK	1.40465
ANGPT2	1.3873
GLIPR2	1.37547
ENSSSCG00000032003	1.35499
ARPC2	1.34809
PLAAT3	1.33832
ND4	1.338
RAC2	1.32472
ENSSSCG00000004666	1.31831
ISG15	1.27766
RPS20	1.20872
RPL7A	1.20033
NDFIP2	1.19853
ENSSSCG00000036716	1.17847
FADS3	1.17128
VAMP8	1.16897
RPL3	1.15724
MRPS25	1.15028
PARVG	1.13232
ENSSSCG00000038507	1.11907
TMEM173	1.09338
HSP90AA1	1.06441
SUSD3	1.05842
ENSSSCG00000025499	1.05039
ENSSSCG00000000657	1.04443
CFL1	1.03525
COX5B	1.02992
PSMB8	1.02796
GNB2	1.02327
GSTA4	1.01377
RPS26	0.99096
ENSSSCG00000008433	0.986117
CD52	0.983611
RPS17	0.974706
DYNLL1	0.966922
ENSSSCG00000018063	0.945514
ENSSSCG00000011234	0.941001
BATF	0.934298
HMGN3	0.929659
ENSSSCG00000027826	0.914796
ENSSSCG00000036114	0.910805
ENSSSCG00000010203	0.885931
ARPC4	0.878984
ENSSSCG00000037030	0.870817
ENSSSCG00000029830	0.868234
ENSSSCG00000039046	0.863025
ENSSSCG00000020777	0.858343
ENSSSCG00000036296	0.853138
EZR	0.852877
RPLP2	0.831468
ENSSSCG00000017509	0.824241
ANXA1	0.822623
CARD19	0.820964
ENSSSCG00000015337	0.820044
CCL5	0.816734
SMC4	0.815968
ITM2C	0.814238
ENSSSCG00000012397	0.803501
OAZ1	0.803157
DYNLT3	0.789555
ENSSSCG00000033500	0.782546
PDK1	0.77755
H3F3A	0.77455
ENSSSCG00000003914	0.769598
HSPE1	0.759491
FTL	0.752122
ND2	0.745386
MAF	0.732012
ENSSSCG00000003253	0.730683
SMAP1	0.729549
NUCKS1	0.726562
RAP1A	0.723876
NME2	0.720842
ND1	0.718903
CTSC	0.713517
ENSSSCG00000016903	0.711356
HSP90AB1	0.708643
CAPZA1	0.704559
CPD	0.703613
EVL	0.70287
PNRC1	0.700355
ENSSSCG00000004145	0.697284
IFITM3	0.68603
ITGB7	0.685145
DDX5	0.683113
NPM1	0.680151
IRF5	0.673283
RPS12	0.661221
COX4I1	0.65531
RPL26	0.650911
ENSSSCG00000002550	0.650484
LAMTOR2	0.649506
ENSSSCG00000033733	0.64748
COX8A	0.630738
ENSSSCG00000034448	0.629808
AHI1	0.628389
COX7A2	0.627105
SOD1	0.621129
UBB	0.615836
ZBTB32	0.613584
RPSA	0.610706
GPR183	0.610372
ENSSSCG00000007188	0.607723
ENSSSCG00000033734	0.604052
ENSSSCG00000007088	0.600798
NKG7	0.594141
ENSSSCG00000039740	0.594003
H3F3B	0.593992
TYMS	0.593415
ENSSSCG00000020790	0.590296
ENSSSCG00000003691	0.588348
COX6A1	0.581848
SLA.DMA	0.581408
CDK2AP2	0.581173
ENSSSCG00000013366	0.579646
ABLIM1	0.575229
ARHGDIA	0.575177
UBC	0.574256
CGA	0.573931
CD48	0.569384
CD9	0.566349
ENSSSCG00000022176	0.565245
CD80	0.564082
ENSSSCG00000039581	0.560818
CAP1	0.558305
GMFG	0.557818
EIF3K	0.557247
EEF2	0.554797
PLXND1	0.550741
LAG3	0.547556
ENSSSCG00000034019	0.546754
LXN	0.546162
ENSSSCG00000039460	0.542537
TMEM50A	0.535896
ENSSSCG00000031912	0.53214
MRPL57	0.528731
ENSSSCG00000001398	0.526433
ENSSSCG00000023158	0.525287
ARPC1B	0.520013
ENSSSCG00000016263	0.518462
FAM129A	0.517729
EEF1D	0.516992
CCNG1	0.516665
PTMA	0.515511
MIF	0.510827
CAPZB	0.503881
TNFRSF1B	0.502593
ITM2B	0.501895
ENSSSCG00000024776	0.501691
ENSSSCG00000000273	0.500703
TMEM258	0.497665
NOP10	0.49714
ENSSSCG00000021591	0.495911
SLC25A3	0.492732
EIF1	0.492515
COX7C	0.487755
MISP3	0.487219
ENSSSCG00000028485	0.486742
ATP5MC1	0.48383
HNRNPDL	0.483602
RCAN3	0.48336
CHD3	0.481906
ENSSSCG00000015447	0.480798
ENSSSCG00000000905	0.479573
SLC25A6	0.478675
LCK	0.47709
PTPRC	0.474638
ENSSSCG00000000071	0.474498
ENSSSCG00000002907	0.472619
BTF3	0.472575
LEPROTL1	0.471436
COX6C	0.471293
PSIP1	0.466978
TMEM160	0.464699
LCP1	0.464315
ENSSSCG00000008061	0.464169
COX7B	0.463991
SPCS3	0.461087
CTSH	0.458942
GRB2	0.458525
SAMD9	0.458086
ENSSSCG00000008170	0.458071
UBL3	0.457451
IFIT1	0.455764
SRSF5	0.453602
CORO1A	0.448332
UBE2D3	0.447658
CIRBP	0.446243
ENSSSCG00000013889	0.444781
ENSSSCG00000015710	0.441833
CTLA4	0.44151
RHOA	0.43864
ENSSSCG00000015664	0.437997
STK17B	0.437382
ENSSSCG00000016737	0.436443
TNFAIP3	0.436185
SERPINF1	0.435314
NDUFB10	0.433568
ENSSSCG00000031897	0.432572
YWHAZ	0.432065
SSR2	0.431896
ENSSSCG00000004307	0.431359
ARPC5	0.427459
RHOG	0.425242
CD3G	0.425166
PNISR	0.422036
ENSSSCG00000030300	0.420744
TBC1D20	0.416986
SH2D1A	0.416771
BAX	0.414534
PSMB2	0.412569
ENSSSCG00000040118	0.412003
ENSSSCG00000037885	0.410314
MNDA	0.409996
CD86	0.408885
BZW1	0.408622
NDUFS5	0.407813
SON	0.407108
EMP3	0.404636
ENO1	0.402022
ENSSSCG00000006418	0.40122
CD40LG	0.401022
ENSSSCG00000017213	0.398807
MAP2K2	0.398534
IPO11	0.398443
RGS19	0.39673
RPL27	0.39537
SGCA	0.394819
ATP6V1E1	0.39463
UBXN1	0.393992
ENSSSCG00000016758	0.392842
CD2	0.391875
TWF2	0.391512
RPS10.NUDT3	0.391104
MOV10	0.388857
UBE2L6	0.388253
COX17	0.388142
ITGB2	0.387217
ZNRF1	0.386465
BIN1	0.386316
ECHS1	0.386258
CPPED1	0.38558
CD81	0.384708
SEC61B	0.384511
SERBP1	0.382272
CNDP2	0.382065
CLTA	0.381647
GCNT4	0.381484
ACTR2	0.380212
ENSSSCG00000036350	0.377657
ENSSSCG00000033909	0.377203
TPM4	0.376084
SSBP4	0.375781
FUNDC1	0.374247
HSPA8	0.37422
RPL10A	0.373597
SLC25A5	0.37226
CCDC50	0.371937
TGIF2.RAB5IF	0.371534
WDR1	0.37131
ENSSSCG00000013992	0.370101
LAX1	0.369151
ATP5IF1	0.367677
EIF4B	0.3667
SRPK1	0.365885
GAPDH	0.36503
DBI	0.364905
HK3	0.364258
SF3B6	0.363679
SEC61G	0.363061
SSR4	0.36293
ENSSSCG00000036096	0.362612
COX7A2L	0.361001
NPL	0.360743
GABARAP	0.360502
ID2	0.360321
EPSTI1	0.359094
ATP5F1E	0.355778
2021-09-01	0.355233
PFDN4	0.354768
2021-09-06	0.354574
PDCD1	0.353854
H2AFV	0.353411
TUBA1B	0.352498
DUSP1	0.351993
NTAN1	0.351299
PARK7	0.351056
FLI1	0.350654
ENSSSCG00000033744	0.349959
ETS1	0.348866
ISCU	0.34674
ARRB2	0.346427
YWHAB	0.344954
LNPEP	0.344517
PSMB7	0.343347
RPL36AL	0.342778
CD247	0.342767
RESF1	0.342623
PNN	0.342311
TRMT112	0.341666
TPM3	0.341576
ENSSSCG00000014540	0.34152
EIF3E	0.341209
MYO1G	0.341109
ENSSSCG00000039582	0.340883
NDUFA13	0.338519
TMA7	0.337671
PTPN4	0.337383
GPX4	0.337035
ENSSSCG00000001396	0.336606
PFKP	0.335594
JAK1	0.334118
ENSSSCG00000027840	0.333395
ENSSSCG00000002004	0.333126
ATP5MD	0.332629
IL7R	0.332339
HYPK	0.330985
IL2RB	0.330754
NOP53	0.330626
ENSSSCG00000003903	0.329933
ATP6V1G1	0.329847
VPS28	0.329747
NDUFB7	0.329736
RAN	0.329324
HSH2D	0.327267
SKAP1	0.326602
MICOS10	0.325383
COTL1	0.325196
ND3	0.325151
HNRNPU	0.324864
FUS	0.323905
HNRNPC	0.323055
IL6ST	0.321568
ENSSSCG00000003520	0.320845
SDF4	0.3201
LDLRAP1	0.319278
ENSSSCG00000016990	0.318112
PRKCSH	0.317539
CSK	0.31531
SRSF2	0.315163
ATP5MC2	0.314476
RORC	0.314031
ENSSSCG00000009327	0.31391
REEP5	0.313017
ENSSSCG00000012178	0.312577
UBXN11	0.311426
SRI	0.311338
SF3B1	0.310761
ATP5PF	0.310608
IDH2	0.310604
ENSSSCG00000018061	0.309406
LIMD2	0.307919
TAF1D	0.307122
LAMTOR4	0.306796
RSAD2	0.306602
HMGN2	0.30384
TMEM134	0.303805
TBCA	0.303035
RNF19A	0.302347
ENSSSCG00000023331	0.301207
ANXA5	0.300935
SUMO2	0.299969
PPIB	0.298454
ENSSSCG00000006061	0.298427
ENSSSCG00000023792	0.29802
RILPL2	0.296929
BCAS4	0.296369
GNG2	0.295558
CD3E	0.295386
SSB	0.294906
SRPK2	0.294847
SELENOT	0.29482
ZFP36L2	0.292115
CCT2	0.292094
BCAP31	0.291666
ENSSSCG00000034190	0.288908
POMP	0.288826
PAIP2	0.288683
DDIT4	0.287674
ENSSSCG00000017555	0.28762
RAP2B	0.287581
HERC5	0.286929
ENSSSCG00000024263	0.286057
SIT1	0.285844
PTPN18	0.28569
ENSSSCG00000013661	0.285314
ENSSSCG00000027196	0.285268
CYTIP	0.284945
ENSSSCG00000005656	0.284881
ENSSSCG00000029857	0.284571
PSMA6	0.28381
ENSSSCG00000007743	0.283716
ENSSSCG00000016262	0.283672
NAP1L1	0.282092
CCT3	0.27998
KLF2	0.278577
HIGD2A	0.276671
ENSSSCG00000024313	0.27639
PSMA7	0.276156
ENSSSCG00000000365	0.274752
NDUFS8	0.273625
HNRNPK	0.273259
ACP1	0.272309
MGST3	0.272273
PDCD10	0.272089
PQLC3	0.271319
CDKN1B	0.270695
ENSSSCG00000034709	0.270458
CYBA	0.270308
ENSSSCG00000027746	0.269634
EIF3D	0.269114
PNRC2	0.268309
ENSSSCG00000037364	0.267979
IL6R	0.26653
STK4	0.266395
ZC3HAV1	0.265741
NDUFB9	0.26561
MTDH	0.265574
HSPB1	0.26533
TRAM1	0.264935
FKBP11	0.264901
TMEM59	0.264885
RAB2A	0.264229
ENSSSCG00000037081	0.263827
RAP1B	0.263577
ATP5F1A	0.263149
RCSD1	0.262856
SUMO1	0.262356
BIN2	0.262267
AIMP1	0.261733
SNF8	0.261039
HCST	0.260973
ENSSSCG00000001075	0.260365
RABAC1	0.259755
TM9SF2	0.258164
NDFIP1	0.256244
FYB1	0.255567
UNC119	0.255435
CALCOCO2	0.254795
DDX46	0.25461
ENSSSCG00000027085	0.25459
NDUFC1	0.254515
ADD3	0.254206
ANKRD12	0.254078
PSMA3	0.253942
GPSM3	0.253776
CREBZF	0.253025
RALY	0.252365
FAM49B	0.252354
DDX39B	0.252052
ENSSSCG00000001779	0.251827
CNN2	0.251766
FERMT3	0.251116
ETHE1	0.250755
CD47	0.250521
RSRC2	0.249506
CD5	0.249446
ENSSSCG00000014075	0.248994
TMBIM6	0.248608
ENSSSCG00000022912	0.248312
RAB11A	0.24799
PPP1CC	0.2472
CSNK1A1	0.246839
EIF3I	0.246806
EIF4A1	0.245843
CAPZA2	0.245617
ENSSSCG00000034868	0.245282
IFI44L	0.244519
SLC9A3R1	0.244348
HNRNPM	0.24358
ATP5PB	0.243571
ENSSSCG00000010674	0.24347
TMEM9B	0.243027
PGK1	0.242728
SLC1A4	0.242702
GADD45A	0.242644
ME2	0.242581
ARL6IP5	0.242072
ACP5	0.241958
VASP	0.241881
ENSSSCG00000011764	0.241292
KHDRBS1	0.241198
CRLF3	0.240724
ANKRD10	0.240403
CDC123	0.239997
CHMP4B	0.23988
BRK1	0.239827
SEC11A	0.239241
ARF4	0.238724
ZFP36	0.238568
LCN2	0.238448
SPCS1	0.238447
CD37	0.238422
MSN	0.23831
CCR5	0.237918
HSPA5	0.237917
MGAT4A	0.237904
M6PR	0.237627
SATB1	0.237342
SAP18	0.237039
RBX1	0.236842
SFT2D1	0.236784
SDF2	0.236133
PPP1CA	0.236062
TRAF3IP3	0.235532
ATXN7L3B	0.235507
RBMX	0.235131
PSMB6	0.234966
MBNL1	0.234705
SRRM1	0.234637
GLUD1	0.23435
TMEM123	0.2343
SH3BGRL	0.234247
ENSSSCG00000016100	0.233843
ENSSSCG00000016970	0.233673
ATRX	0.232737
PCBP2	0.232095
RTRAF	0.232029
SLC25A24	0.232024
CEBPB	0.231782
S1PR1	0.231781
ESD	0.231571
ENSSSCG00000001063	0.231479
TAGAP	0.231165
RORA	0.230761
ENSSSCG00000015040	0.230625
ATP5ME	0.230569
ENSSSCG00000000405	0.230116
REX1BD	0.229903
ATP5PO	0.229777
UQCRC1	0.229578
GSPT2	0.229347
PDIA6	0.229324
SMC3	0.228846
EIF2S2	0.228489
SPTBN1	0.228321
U2SURP	0.228156
ENSSSCG00000023323	0.228097
GSN	0.227867
GUK1	0.227257
ARHGAP15	0.227162
ARL6IP1	0.226733
MORF4L1	0.226668
KMT2E	0.225898
DNAJC8	0.225877
CALM3	0.225332
ERH	0.225275
SHKBP1	0.225125
DDX6	0.225076
SMPD1	0.224752
GNAI3	0.224538
IQGAP2	0.224205
TLE5	0.223763
ZNF395	0.223182
HP1BP3	0.222622
VCL	0.222402
ENSSSCG00000007688	0.222155
SETX	0.221663
ENSSSCG00000027675	0.220899
CCNI	0.220745
ENSSSCG00000001097	0.220703
PPP1R18	0.220558
SH3KBP1	0.220482
SF3B2	0.220078
HNRNPH1	0.220034
NDUFB2	0.219896
ENSSSCG00000010320	0.219819
MIEN1	0.219799
TMED9	0.219639
ENSSSCG00000002505	0.219627
CCT4	0.219231
COX5A	0.219172
DDOST	0.219151
PRDX3	0.219114
LGALS3BP	0.218814
TNRC6B	0.218691
ENSSSCG00000012916	0.218684
KRTCAP2	0.218668
ENSSSCG00000004414	0.218564
ENSSSCG00000027348	0.218235
BUD23	0.218024
EIF1B	0.217971
IVNS1ABP	0.217971
ND5	0.217239
CFLAR	0.217098
ENSSSCG00000003849	0.216808
ENSSSCG00000031730	0.21678
ENSSSCG00000013315	0.216643
RNASEH2C	0.216539
POLR2F	0.216352
ENSSSCG00000010517	0.216349
EIF4G2	0.21615
PRRC2C	0.21613
FAS	0.21584
CLDND1	0.215146
NOL7	0.214877
GCHFR	0.21428
SMPD2	0.214159
RASGRP2	0.21414
RBM39	0.214115
ATP6V0B	0.21367
RASA3	0.213587
TMEM263	0.2135
TGFB1	0.213383
ENSSSCG00000014343	0.213033
CD6	0.212722
SKP1	0.21269
STAT1	0.211917
ENSSSCG00000013596	0.211731
CD3D	0.211428
ENSSSCG00000011121	0.211359
ENSSSCG00000036491	0.211331
ENSSSCG00000033653	0.211299
RBM8A	0.211276
ENSSSCG00000009772	0.210374
CD53	0.210373
VPS29	0.210215
ENSSSCG00000014371	0.210185
PSENEN	0.210015
PDCD4	0.209233
ENSSSCG00000036658	0.209119
TXNIP	0.208788
NEDD8	0.2087
THRAP3	0.207778
PTBP3	0.20758
THOC2	0.207477
C12orf10	0.207251
ENSSSCG00000000377	0.207045
ZNF277	0.206748
ENSSSCG00000027565	0.206642
STK26	0.20632
ENSSSCG00000014850	0.206185
SNRPF	0.206176
CCNL1	0.206089
ACOT13	0.205837
ENSSSCG00000028663	0.205437
ENSSSCG00000033068	0.205257
CACYBP	0.205097
CHRAC1	0.20497
ENSSSCG00000001927	0.204311
TMEM30A	0.204037
DAD1	0.203977
EIF3H	0.203975
ENSSSCG00000004963	0.203955
HDAC2	0.203546
CUTA	0.20342
PXK	0.20331
NCL	0.203246
ARHGAP30	0.202945
NKTR	0.202731
TMEM156	0.2024
ADAM19	0.20231
OCIAD1	0.202282
PSME1	0.201646
ARHGAP9	0.201288
ENSSSCG00000009145	0.200768
ENSSSCG00000003211	0.200705
ENSSSCG00000030295	0.200699
SEC11C	0.200659
PLXNC1	0.200611
ENSSSCG00000017754	0.200281
2021-09-07	0.200146
MRPL12	0.200136
RANBP1	0.199733
BCAP29	0.199705
WASF2	0.199657
ENSSSCG00000037602	0.199627
SPOCK2	0.199396
NDUFB4	0.19933
FAXDC2	0.199275
GBP2	0.199189
HNRNPH3	0.198763
POLR2G	0.198693
TUBB	0.198449
ENSSSCG00000013052	0.198036
CGGBP1	0.197571
OXA1L	0.197523
ARID4B	0.197201
SPTLC2	0.197016
ENSSSCG00000036483	0.196817
PRR7	0.196701
ENSSSCG00000035728	0.196548
SNRPD3	0.196506
BLOC1S1	0.196506
SYNGR2	0.196222
METAP2	0.196148
MCRIP1	0.195467
SNRPN	0.195409
MRPS36	0.195255
CLEC12A	0.195237
MAX	0.194963
HNRNPD	0.194901
DPY30	0.194806
DHX36	0.194348
OPTN	0.194342
HBB	0.194155
TVP23C	0.194152
DYRK2	0.194124
ARGLU1	0.193865
ENSSSCG00000016711	0.193762
TRA2B	0.193553
ENSSSCG00000035869	0.192737
TAX1BP1	0.192629
NDUFA1	0.192524
ENSSSCG00000035538	0.192392
ZRANB2	0.192349
ENSSSCG00000011676	0.192312
HNRNPLL	0.192213
LMAN2	0.192196
LPCAT2	0.191699
PTP4A2	0.191388
SPTSSA	0.191339
UBE2V1	0.191226
SHISA5	0.191185
SASH3	0.191104
EIF4H	0.19099
RRAGC	0.190964
TRAPPC2L	0.190726
ENSSSCG00000036988	0.190533
VPS4B	0.190507
ENSSSCG00000007749	0.190498
CD63	0.189991
LY6E	0.18995
RSU1	0.18967
TTC3	0.189347
CCT5	0.189289
ENSSSCG00000038711	0.189262
ATP5MC3	0.189183
TCEA1	0.189036
CCDC25	0.188774
LAMTOR5	0.188346
PKM	0.188343
BIRC3	0.188277
SRP14	0.187967
ENSSSCG00000028097	0.187536
STXBP2	0.187535
GPI	0.187424
FAM32A	0.187166
RALGPS2	0.187164
ENSSSCG00000034314	0.187152
SRSF10	0.186862
YWHAH	0.186858
CETN3	0.186797
GPBP1	0.18669
GLIPR1	0.186594
TMEM154	0.186561
THYN1	0.186316
SIGIRR	0.186207
SPAG8	0.186028
SNX3	0.185469
ENSSSCG00000040801	0.185366
LSM14A	0.185294
C11orf58	0.185115
CINP	0.184874
C1orf21	0.184871
OTULINL	0.184795
UTRN	0.184683
TXNL1	0.184545
STARD4	0.184307
ENSSSCG00000031580	0.184015
ENSSSCG00000006919	0.183997
PDCD5	0.183861
FGL2	0.183574
ANGPTL1	0.18338
SNRPE	0.183365
ENSSSCG00000037595	0.183365
MX2	0.183359
TES	0.183264
PAFAH1B3	0.18318
GPR174	0.182949
TMEM11	0.182847
TMED4	0.182585
ENSSSCG00000034527	0.18226
CYB5B	0.182158
GM2A	0.181751
LAT	0.181537
RHEB	0.181228
HERC6	0.181177
IKZF3	0.181074
CELF1	0.180993
GDI1	0.180925
NPC2	0.180242
PSMB10	0.179762
CAST	0.179745
TSC22D4	0.179685
PRKACB	0.179564
PIP4K2A	0.179554
GATA3	0.179392
RFXANK	0.179242
EIF5B	0.179227
UQCC3	0.179207
TSC22D3	0.17906
FAM210B	0.178739
CSTB	0.178736
RAD21	0.178722
ENSSSCG00000028035	0.178679
DNAJA1	0.178669
MPHOSPH8	0.178593
ITSN2	0.178593
SEC62	0.17838
ENSSSCG00000007978	0.17829
ENSSSCG00000004415	0.177967
ZKSCAN1	0.177798
HNRNPR	0.177673
ANAPC16	0.177622
IRF2	0.177599
IQGAP1	0.177457
WAS	0.177303
PPP2R5C	0.177223
DNASE1L1	0.177213
CD28	0.17713
CCND2	0.177086
GOLPH3L	0.176955
SCAF11	0.176869
DNAJC2	0.176781
PRPS1	0.17655
HMOX2	0.176467
ENSSSCG00000013436	0.176315
ANXA11	0.176153
PSMB1	0.176103
CCT7	0.176065
SUCLG1	0.176011
PPP1R16B	0.175909
MFAP1	0.17559
ENSSSCG00000027907	0.175398
PFDN2	0.175305
PSAP	0.175285
TPI1	0.175106
MDH1	0.175064
PAK2	0.174984
ENSSSCG00000012166	0.17472
ENSSSCG00000032073	0.174555
TMED5	0.174507
ST6GALNAC4	0.174499
LMO4	0.174292
SUN2	0.174273
ENSSSCG00000003885	0.174206
ENSSSCG00000033272	0.174016
SMIM19	0.173988
ACAP1	0.173927
DR1	0.173715
NDUFB6	0.173478
MRPS9	0.173264
ENSSSCG00000005768	0.173157
TRAPPC5	0.173047
PSMD14	0.172578
ENSSSCG00000009128	0.17254
C19orf53	0.172407
RBBP4	0.172289
NOP58	0.172207
ENSSSCG00000010104	0.172136
GSPT1	0.172037
AP2S1	0.171695
CHD2	0.171364
DDX3X	0.171228
CMPK2	0.171119
POLE4	0.171114
CHCHD1	0.170937
STRAP	0.170816
UBASH3A	0.170736
CCR2	0.17069
TIMM13	0.1706
RAB27A	0.170382
SNU13	0.169975
ENSSSCG00000000663	0.169903
TAP1	0.169634
SLAMF7	0.16962
MAP1LC3B	0.169392
RAB5A	0.169379
HIKESHI	0.169151
MX1	0.168952
DAZAP2	0.168847
UBE2B	0.168694
KARS	0.168476
FYN	0.168419
TOMM7	0.168147
SH3GLB1	0.168024
IK	0.167956
RPL26L1	0.167898
NDUFA11	0.167639
PSMB4	0.167577
FNBP4	0.167531
SRRM2	0.16751
ENSSSCG00000012811	0.167482
CALR	0.167281
RNF181	0.167192
PRDX4	0.167003
SMC6	0.166967
ENSSSCG00000040248	0.16682
KMT2C	0.166803
SUCLG2	0.166714
CNPY2	0.1667
ENSSSCG00000032166	0.16655
CD84	0.166481
PPP4R3B	0.166479
CAMK4	0.166277
ERP44	0.166166
TLN1	0.166164
ATF4	0.166154
SCML4	0.165809
HCLS1	0.165774
RBM4	0.165769
SP110	0.165742
GLRX3	0.165564
MAPRE2	0.16556
RNASEH2B	0.165475
ENSSSCG00000025007	0.164465
PSMC6	0.164447
PPP2CA	0.164352
RBM38	0.164295
RTN4	0.164159
COMT	0.16402
SNRPC	0.164005
PIK3R1	0.163897
TNFAIP8	0.163496
CLINT1	0.16343
GYPC	0.163334
EPB41	0.16309
SYNCRIP	0.16299
CXCR4	0.162989
CDC26	0.162959
ENSSSCG00000035048	0.162925
VAPA	0.16285
UQCRQ	0.162776
NANS	0.162767
UCHL5	0.16257
ENSSSCG00000038989	0.16246
API5	0.162327
NDUFC2	0.162239
RAB18	0.162048
LRCH4	0.161883
PDLIM7	0.161627
NDUFV2	0.161596
EIF3A	0.161584
PHTF2	0.161501
ENSSSCG00000010795	0.161496
PRELID1	0.161279
ENSSSCG00000000697	0.161223
RPUSD1	0.161195
BRMS1	0.160847
ENSA	0.160833
SDCBP	0.160482
ENSSSCG00000010954	0.160123
ANAPC13	0.160051
CHD1	0.160004
MANF	0.159924
GABARAPL2	0.159828
TALDO1	0.159752
KLF3	0.159701
ATP2A3	0.159677
CDC42SE1	0.159661
ABI1	0.159515
YIPF5	0.15928
HSPD1	0.1592
RHOC	0.158968
DDX18	0.158669
ITGAL	0.158658
TXNDC17	0.1584
H2AFZ	0.158346
CNBP	0.158006
ENSSSCG00000021738	0.157972
IL2RA	0.157908
RAD23A	0.157733
MDH2	0.15772
ENSSSCG00000013878	0.157542
ZFP36L1	0.157366
MRPL55	0.157352
SLC38A2	0.157025
NDUFS4	0.156812
NSD3	0.156687
LASP1	0.156656
ENSSSCG00000017906	0.156452
ENSSSCG00000039731	0.156247
SAFB2	0.156229
NDUFA10	0.156082
EIF1AX	0.155948
ARL4C	0.155815
NDUFB8	0.155808
ENSSSCG00000039706	0.155804
SLA.DMB	0.155709
TP53	0.155647
ADH5	0.15528
APP	0.155111
TXK	0.154932
BCCIP	0.154699
GZMB	0.154659
ARID5B	0.154568
ENSSSCG00000004446	0.154473
TPR	0.154374
SYF2	0.15436
C5orf15	0.154319
SDHD	0.154287
PBRM1	0.154273
SKIL	0.1542
SELENOF	0.154181
BTF3L4	0.154163
GZMM	0.153579
ILF2	0.153475
MAP1LC3A	0.153432
ERMARD	0.153276
DDX17	0.153126
PHACTR2	0.153125
ORAI3	0.153062
G3BP2	0.152842
CYB561D2	0.152823
PSMA4	0.152675
SNRNP25	0.152637
FUNDC2	0.151965
ENSSSCG00000036626	0.151955
VAMP5	0.15193
CDKN2AIPNL	0.151881
YIF1A	0.151866
SSR3	0.151822
SMDT1	0.151786
NOP56	0.151696
POLR1D	0.151682
IFNAR1	0.151654
BID	0.151542
CRIPT	0.151471
ENSSSCG00000005436	0.151393
NIPBL	0.151236
NDUFS6	0.151197
CRBN	0.151048
RAB24	0.15102
METTL8	0.150832
ENSSSCG00000014618	0.150784
RBM26	0.150779
TCF25	0.15077
NMI	0.150574
IRF3	0.150525
CCND3	0.150384
CXCL10	0.149937
PIK3R5	0.149745
EIF3L	0.149669
ITK	0.149624
TFRC	0.14951
LAT2	0.148984
FBL	0.148943
CTSS	0.148845
ELOC	0.148778
COA3	0.148769
CRADD	0.148677
C18orf32	0.148673
TNRC6C	0.148619
EIF6	0.148578
NCALD	0.148543
SLC25A39	0.148359
PLGRKT	0.148326
LRP10	0.148294
ENSSSCG00000037071	0.148266
KRAS	0.148215
ENSSSCG00000010685	0.148196
FCGRT	0.148045
EGLN3	0.147921
CHIC2	0.147908
ENSSSCG00000027491	0.147779
IL10RA	0.147674
CCT8	0.147328
NAA20	0.147327
SCAND1	0.147274
LBR	0.14725
ANKRD27	0.147122
CCNDBP1	0.147116
YWHAQ	0.147102
ELF1	0.147054
PPIG	0.147045
SELENOH	0.146892
PLVAP	0.146892
TMEM71	0.146644
SFPQ	0.146592
FGD3	0.146532
SLC44A2	0.146438
ENSSSCG00000007203	0.146413
USP18	0.146411
KDM1B	0.146323
UCK1	0.146253
ASH1L	0.146212
NARS	0.14611
HMGA1	0.146003
GYG1	0.145874
NFKBIB	0.145483
RTF1	0.145423
MOB3A	0.145363
ENSSSCG00000039249	0.145339
ENSSSCG00000000097	0.145216
COPS6	0.145125
DOCK2	0.144892
STK38	0.144853
ENSSSCG00000033987	0.144683
FUT7	0.144589
CEBPZOS	0.144558
HK1	0.144338
ENSSSCG00000028479	0.144248
MAP3K1	0.143849
SLA2	0.143788
HIST1H1E	0.143694
MRPL34	0.143572
CCNB1IP1	0.143534
TSR3	0.143482
MAGT1	0.143256
CDC5L	0.143189
SLC4A7	0.14318
TMEM60	0.142849
ENSSSCG00000010158	0.142828
TMCO1	0.14279
KLK7	0.142746
PCMT1	0.14274
LSM2	0.142607
PRMT1	0.142563
PTPN6	0.142443
SNRPD1	0.142427
FKBP3	0.142393
ENSSSCG00000038359	0.142124
TYROBP	0.141974
RNF149	0.141906
RNF4	0.141878
ENSSSCG00000039331	0.141804
AOAH	0.141722
ENSSSCG00000014267	0.141713
RNH1	0.141623
CYC1	0.141601
WDR46	0.141562
TIMM9	0.141436
PPM1G	0.141434
ENSSSCG00000014013	0.141387
ENSSSCG00000039407	0.141362
BTG2	0.141274
NDUFA6	0.141069
SERP1	0.141067
ETFRF1	0.141003
PSMC3	0.140956
ATP5F1C	0.140939
SRSF7	0.140883
YTHDF2	0.140878
HM13	0.140751
RASSF1	0.14066
CHID1	0.140564
TNRC6A	0.140525
SDHB	0.140362
ENSSSCG00000012961	0.140126
RNPEP	0.14008
ENSSSCG00000031773	0.139988
CD38	0.139853
TIA1	0.139679
ENSSSCG00000011290	0.139613
ZAP70	0.139504
SREK1	0.139467
ATF7IP	0.139415
ZBTB38	0.139341
ENSSSCG00000032591	0.139271
REL	0.139146
CCSER2	0.13913
TAOK3	0.1391
CTSA	0.138868
ACADVL	0.138668
MRPS15	0.138638
FOXN3	0.138633
ENSSSCG00000037869	0.138582
STAG2	0.138555
CCS	0.138487
MEA1	0.13837
RNF114	0.138138
TMEM50B	0.137949
ENSSSCG00000030478	0.137862
PVRIG	0.13736
FLOT1	0.137326
BRWD1	0.137209
MYO5A	0.137196
PIGC	0.13713
KCTD20	0.137103
ENSSSCG00000032942	0.137008
IRF7	0.136984
PHF14	0.136779
YAF2	0.136769
ENSSSCG00000016226	0.136717
ROMO1	0.136603
NOL9	0.136369
ENSSSCG00000009625	0.136324
LSM7	0.136269
ENSSSCG00000033757	0.135869
RASGRP1	0.135852
EMD	0.13583
ENSSSCG00000017928	0.13561
GRK6	0.135399
MVP	0.135333
KDELR1	0.135211
CTSD	0.135206
TRPC4AP	0.13502
RER1	0.134995
RCHY1	0.13487
BPTF	0.134846
ENSSSCG00000002449	0.134731
RTF2	0.134665
CENPF	0.134606
STK39	0.134459
ENSSSCG00000006628	0.13441
EDF1	0.134388
MOB1A	0.134334
PRDX2	0.134305
DCUN1D5	0.134292
ENSSSCG00000025593	0.134281
DHRS7	0.134275
ROCK1	0.134228
TSPAN5	0.13379
MCL1	0.133719
JARID2	0.133708
CITED2	0.133687
MFSD10	0.133659
ENSSSCG00000006830	0.133632
PSMB3	0.133603
ENSSSCG00000038364	0.133586
SENP2	0.133165
CNOT7	0.133005
MAPK1IP1L	0.132961
ACOX1	0.132942
XPA	0.132932
ENSSSCG00000017165	0.132669
ELMO1	0.132513
DYNLRB1	0.132448
TKT	0.132336
PRKAR1A	0.132286
SQSTM1	0.132267
AURKAIP1	0.132226
TGIF1	0.1322
BUD31	0.132058
TMEM9	0.131959
ENSSSCG00000033212	0.131911
SUPT4H1	0.131833
NREP	0.131818
ILK	0.131765
PPIH	0.1317
PUF60	0.131659
ACRBP	0.131573
ENSSSCG00000039658	0.131526
ENSSSCG00000031169	0.131487
FMNL1	0.131382
RBL2	0.131303
ENSSSCG00000035209	0.131264
ENSSSCG00000017626	0.131211
ENSSSCG00000007098	0.131153
TUT4	0.131045
MED19	0.130951
TASOR	0.130924
PAXX	0.130851
ENSSSCG00000006380	0.130707
CBLB	0.130543
ENSSSCG00000011117	0.130381
RNF135	0.130354
ENSSSCG00000007355	0.130268
CD44	0.130245
STRADB	0.13022
NAXE	0.130193
LFNG	0.130002
SMARCE1	0.129978
RFC1	0.129959
TUBB4B	0.129902
ENSSSCG00000034896	0.129845
ZC3H15	0.129822
RAB10	0.129686
ENSSSCG00000040857	0.129476
RBMS1	0.129393
THOC6	0.129376
ELOA	0.129351
ZNHIT1	0.129324
RAB35	0.129296
TCP1	0.129272
PEF1	0.129162
EBNA1BP2	0.128998
C9orf78	0.128952
GOLM1	0.128897
RSF1	0.128879
DDX24	0.128823
CAMTA2	0.128679
AP2B1	0.128618
NRBP1	0.128594
POLD3	0.128525
DDT	0.128445
TRPS1	0.128302
CANX	0.128242
SND1	0.128172
STXBP3	0.128143
FNIP2	0.128124
ENSSSCG00000003771	0.128121
CTNNB1	0.128119
ENSSSCG00000040396	0.128002
RGS14	0.127952
ENSSSCG00000022906	0.127942
PSMD2	0.127857
ENSSSCG00000016475	0.127847
PIAS1	0.127804
FCER1G	0.127775
PDIA3	0.127572
IL27RA	0.127567
GNAI2	0.12753
RSBN1L	0.127508
ATXN7L1	0.127365
RASSF5	0.12729
SUPT20H	0.127143
CD4	0.127141
IFI30	0.127133
ARFGAP3	0.127073
ENSSSCG00000023160	0.127057
CDCA7L	0.127032
POLR2K	0.126873
PGM1	0.12686
NDUFS7	0.126841
EGFL8	0.126834
ENSSSCG00000033703	0.126567
MRPS26	0.126381
ENSSSCG00000013155	0.126241
ENSSSCG00000009692	0.126171
ENSSSCG00000005518	0.126149
NPM2	0.126128
KRCC1	0.126126
GDI2	0.126106
RSL1D1	0.126104
IMP4	0.126037
DOCK11	0.126035
APBB1IP	0.125985
MFNG	0.125854
EWSR1	0.125849
ENSSSCG00000014031	0.125785
SF3B5	0.125415
NUDT21	0.125286
SERTAD1	0.125197
UPRT	0.124862
CTSF	0.124852
FAR2	0.124756
TIMM10	0.124728
SRSF6	0.124533
ENSSSCG00000024696	0.124449
LMBR1L	0.124345
SLC25A36	0.124327
NDUFA8	0.124257
ENSSSCG00000006324	0.124145
TAPBP	0.12405
RRP15	0.124044
TIMM8B	0.123993
FAM162A	0.123978
DNMT3A	0.123948
RGCC	0.123833
CDC42EP3	0.123748
SUGT1	0.123731
COPB2	0.123682
ICOS	0.12366
SMAD2	0.123638
CMAS	0.12354
BCLAF1	0.123375
TMC6	0.123268
ENSSSCG00000032060	0.123265
GOT2	0.123265
AKAP7	0.123229
FYTTD1	0.123199
TRIM22	0.123136
CUL1	0.123051
ENSSSCG00000013453	0.123018
MRTO4	0.122983
CHORDC1	0.122812
CREB3L1	0.122785
TUBGCP2	0.122767
PPP2R1A	0.12258
ENSSSCG00000013232	0.122568
POLR2I	0.122534
ZBTB18	0.122484
TM2D1	0.122341
MEAF6	0.122336
MAT2A	0.12226
CMTM3	0.122238
ZBTB7A	0.122215
ENSSSCG00000032017	0.12218
PIN1	0.122061
KDM5A	0.121998
NBR1	0.121961
SPG21	0.121895
PFDN1	0.121894
DLGAP4	0.121803
ACAT1	0.121795
TAF9	0.121629
NCBP2	0.121564
GLS	0.121508
CD1D	0.121487
UBE2V2	0.121458
CENPH	0.121454
ENSSSCG00000038581	0.121439
MYDGF	0.121438
ENSSSCG00000037054	0.121436
SNRPA1	0.121323
PLSCR3	0.12132
ENSSSCG00000000635	0.12117
UQCR10	0.120967
SERPINB1	0.120889
CNP	0.12077
GNLY	0.120742
ENSSSCG00000038708	0.120701
TBC1D10C	0.120473
BAG1	0.120424
SLC35C2	0.120412
PHB2	0.120375
ENSSSCG00000036595	0.120369
DAP3	0.120329
CIAO2B	0.120266
CIR1	0.120094
BRD9	0.120036
RNF7	0.120012
C6orf62	0.119888
PPP1R10	0.119834
BDH1	0.11967
EIF2A	0.119555
ELOVL5	0.119537
MAP4K1	0.119424
EIF1AY	0.119211
TRADD	0.119165
R3HDM1	0.119157
PSMC5	0.119148
WBP4	0.119128
CAB39L	0.11912
PLCL2	0.119075
NME1	0.11903
COASY	0.11894
ENSSSCG00000000611	0.11882
ZNF800	0.118733
FAM171B	0.118715
ENSSSCG00000009851	0.118679
DARS	0.118679
SMIM7	0.118659
IFIT5	0.118602
U2AF2	0.11858
ENSSSCG00000014672	0.118555
ERAP2	0.118536
TNIP1	0.118535
ARHGAP25	0.118534
PRKD3	0.118519
MGAT1	0.118511
UBE2G1	0.118426
NUB1	0.11839
USP8	0.118241
CHCHD3	0.117977
LAMTOR1	0.11793
MAT2B	0.117879
SMAD4	0.117769
APH1A	0.117709
GTF2F2	0.117584
UBQLN1	0.117568
CLK4	0.117548
PDCD1LG2	0.117363
TMEM19	0.117263
DPP4	0.117114
CYCS	0.117007
EMC6	0.117006
ENSSSCG00000033037	0.116935
MAP4K2	0.116853
MBP	0.116843
AP3B1	0.116819
PPP2R5E	0.116811
ENSSSCG00000020808	0.116754
COMMD6	0.116739
CWC15	0.116736
CSDE1	0.116715
RPS19BP1	0.116581
RCN2	0.116581
BNIP3L	0.11653
ENSSSCG00000040782	0.116434
CNOT2	0.116414
TIMM17B	0.116254
TSPAN17	0.116245
PARVB	0.116189
ENSSSCG00000022058	0.116186
SNRK	0.116129
PABPN1	0.116105
PPP2R5A	0.116104
SNX6	0.116098
EEF1AKMT1	0.116096
SMCHD1	0.115952
ENSSSCG00000025060	0.115911
ENSSSCG00000040827	0.115889
DNAJC10	0.115886
NUDT1	0.115886
ENSSSCG00000036224	0.115837
ENSSSCG00000007253	0.115821
ENSSSCG00000012046	0.115669
WDR45	0.115622
INPP5B	0.115517
PSMF1	0.115491
DRG1	0.115475
DMAC2	0.115442
BOLA3	0.11538
TUBA4A	0.115285
RAB31	0.115221
ATP6V0C	0.115163
FLT3LG	0.115138
MED4	0.115061
PPP2R2A	0.114863
ARL14EP	0.114578
FAM83A	0.114558
BAZ1B	0.114479
ARL2	0.114471
PPP1R12A	0.114415
ENSSSCG00000031152	0.114388
AUP1	0.114265
MRPS2	0.114247
ARHGAP4	0.114243
SRP19	0.114168
NIPAL1	0.114156
ENSSSCG00000015011	0.114125
ENSSSCG00000013721	0.114077
TNNI2	0.114019
MRPL17	0.113967
SRPRA	0.11383
ATP5F1D	0.113799
FAM78A	0.113697
CBX1	0.113684
NAA25	0.113657
ELAVL1	0.113657
ESYT2	0.113574
H2AFJ	0.11346
BRD7	0.113423
PYCR3	0.113384
MAP2K3	0.113255
SHOC2	0.113174
TNFSF10	0.113171
IRF1	0.113113
RBM25	0.113075
UQCC2	0.113071
PDIA4	0.11291
DDRGK1	0.112762
ENSSSCG00000037143	0.112726
SSRP1	0.112536
SF3A3	0.11235
SLC35B1	0.112237
APOBEC3B	0.112207
FMC1	0.1122
MRPL20	0.112098
ENSSSCG00000028397	0.112083
PCNA	0.112037
DUSP2	0.112
SARNP	0.111892
DNMT1	0.111716
CSRP1	0.111596
MMD	0.111541
MRPS6	0.111539
WDR82	0.111508
MLF2	0.111501
MRPL52	0.1115
PEA15	0.111472
CNIH1	0.111389
ZNF292	0.111344
WTAP	0.11133
SARAF	0.111246
PSMD1	0.111192
SNW1	0.111132
ENSSSCG00000001038	0.111087
ENSSSCG00000028695	0.111058
IFT20	0.110925
CHKB	0.110919
MMADHC	0.110829
HSPA14	0.110772
BRD4	0.110751
NFKBIA	0.110696
CLNS1A	0.11064
RNF26	0.110537
CISH	0.11045
TXN2	0.110411
CUEDC2	0.110359
CCDC124	0.110324
OGFOD2	0.110267
SEC13	0.110228
ENSSSCG00000001414	0.110188
RNPS1	0.110077
C12orf57	0.110077
WARS	0.110048
BUB3	0.109975
NXT1	0.109899
MRPS12	0.109771
LPGAT1	0.109712
PRDX6	0.109708
ENSSSCG00000035520	0.109635
TMED10	0.109585
DYNLT1	0.109529
TC2N	0.109515
ENSSSCG00000005658	0.109501
RSL24D1	0.109393
ATAD1	0.109345
NCOA7	0.109276
EIPR1	0.109275
LDLRAD4	0.109192
GADD45GIP1	0.109189
PHF11	0.109175
ENSSSCG00000039618	0.109175
PSMD13	0.109144
CYTH1	0.109127
PIN4	0.109108
STX8	0.109076
ENSSSCG00000006363	0.108993
CCDC9	0.108968
AHR	0.108917
ENSSSCG00000034072	0.108816
TMEM189	0.108773
VPS72	0.108757
KIF5B	0.108714
ATP6AP1	0.108709
ENSSSCG00000021560	0.108629
DHRS11	0.108587
USP5	0.108583
CD8B	0.108315
ENSSSCG00000002996	0.10822
ENSSSCG00000007031	0.108057
JADE1	0.108002
BAD	0.107949
DGKZ	0.107907
ENSSSCG00000016096	0.107892
KCNAB2	0.10786
DDX21	0.107853
PI4K2B	0.107828
RAB8A	0.107792
UCHL3	0.107732
GIT2	0.107622
ENSSSCG00000007826	0.107511
RPN2	0.107342
GRK2	0.107313
PHB	0.107235
G3BP1	0.107189
TBK1	0.1071
TAOK2	0.107085
MRPS18A	0.10707
CARHSP1	0.107041
ENSSSCG00000039635	0.106977
ENSSSCG00000007322	0.106962
MRPL24	0.106957
YKT6	0.106955
VSIR	0.106874
PAIP1	0.106868
GPR171	0.106856
RUVBL1	0.1068
RASA2	0.106717
ENSSSCG00000001696	0.106715
HPF1	0.106664
CFDP1	0.106573
CCPG1	0.106515
MYL9	0.106376
MATK	0.106336
HSPA9	0.106311
NSRP1	0.10626
TMC8	0.106171
XPO5	0.106099
SYAP1	0.106
MBIP	0.105953
PUM2	0.105949
PDE3B	0.105803
RAC1	0.105753
CNOT4	0.105714
PLEKHO1	0.10569
DHX9	0.105687
CRELD2	0.105662
DGKA	0.105586
PGRMC1	0.105583
ZMYM1	0.105552
TRIB2	0.105549
MED10	0.105529
EXOC2	0.105318
DKC1	0.105247
GTF2H5	0.105012
SP3	0.104981
COPS2	0.104884
C1orf35	0.104883
ATG12	0.10482
WDR45B	0.104709
ARF5	0.104683
RASSF4	0.104675
GTF2I	0.104652
UBAP1	0.104649
TUT7	0.104618
RAB7A	0.104605
RPN1	0.10459
UBL4A	0.104505
RAB5C	0.104459
PDAP1	0.104424
ACTR10	0.104341
DAPK2	0.104279
DENND2D	0.104162
BPGM	0.104138
POGLUT1	0.104117
RBCK1	0.104109
ENSSSCG00000038444	0.103997
DCPS	0.103982
PPP1R11	0.103962
ADRM1	0.103884
HMCES	0.103823
NACC1	0.103815
CDK12	0.103688
DCTN2	0.103638
ENSSSCG00000002259	0.103614
CAPNS1	0.103556
GPD1	0.103435
PRPF4B	0.103336
TENT2	0.103287
EHD1	0.103235
ENSSSCG00000001505	0.10303
EIF2AK4	0.102916
ENSSSCG00000004583	0.10286
TRMT1L	0.102845
ENSSSCG00000008990	0.102784
RAB6A	0.102782
KDSR	0.102745
ITPR2	0.102737
ENSSSCG00000016451	0.102687
COMMD1	0.102678
GGA2	0.102662
NONO	0.10263
PTTG1IP	0.102618
FZR1	0.102506
CWF19L2	0.102494
GGNBP2	0.102463
ZC3H12D	0.102437
DAPL1	0.102383
THOC7	0.102292
ALG13	0.102197
ENSSSCG00000003348	0.10207
NKX3.1	0.101861
LY86	0.101774
NELFCD	0.101749
BZW2	0.101721
REV1	0.101647
SAFB	0.101594
RBPJ	0.101578
PHKG2	0.101436
RPRD1A	0.101365
MTF2	0.101175
CHCHD5	0.101074
C12orf75	0.101037
PELI1	0.10103
CHMP5	0.100921
SETDB2	0.100793
NDUFB11	0.100792
AKR1A1	0.100752
SNX27	0.100675
FKBP5	0.100661
HNRNPH2	0.100573
FAM50A	0.100206
RHOH	0.100174
PIGY	0.100145
PCYOX1	0.10014
PARP8	0.100126
HIPK1	0.0999961
RGS1	0.0999865
MAPKAPK3	0.099968
THUMPD3	0.0999285
CERS2	0.0999217
ENSSSCG00000006382	0.0999029
POLR2C	0.0998423
MALT1	0.0997762
C20orf27	0.0997254
NOL8	0.0997045
TP53INP1	0.0996733
UBE2D2	0.0996672
ID3	0.0996374
RBM17	0.0996332
ENSSSCG00000031117	0.0996313
DHRS3	0.0995349
USP3	0.0994057
CEP192	0.0993703
ENSSSCG00000006665	0.0993159
SIVA1	0.0993128
DOCK10	0.0992621
HSD17B10	0.0991987
UBE2A	0.0991683
SMARCA2	0.0991319
SLIRP	0.0990627
IDH3G	0.0990184
ESS2	0.0989882
ERP29	0.0989875
CEP164	0.0989279
PPM1A	0.0988861
CISD2	0.0988424
ENSSSCG00000014280	0.0988069
SSR1	0.0988062
CDC42SE2	0.0987163
NAPSA	0.0987152
DLD	0.0986983
PPP3CC	0.098697
CHURC1	0.0986412
JMJD1C	0.0986188
STUB1	0.0985007
PCNX4	0.0984919
ARID4A	0.0984579
DCAF8	0.098382
MEF2A	0.0983146
CCM2	0.0982412
FAM89A	0.0982353
TOR4A	0.0981676
MED13L	0.0981525
UXT	0.0981333
ELK4	0.0980965
AKAP9	0.0980196
DDX3Y	0.0980018
MKKS	0.0979905
SRSF4	0.0979902
ENSSSCG00000037565	0.0978673
TIAM1	0.0978592
URI1	0.0978549
NXF1	0.0977903
ENSSSCG00000038825	0.0977767
PPP1CB	0.0977493
RNF146	0.097744
ITGB1BP1	0.0977097
CCDC115	0.0976733
FLII	0.0976451
MTPN	0.0976049
ENSSSCG00000002953	0.0975902
CLIP1	0.0975673
LSM6	0.0975638
CPSF6	0.0974661
DPM1	0.0974549
INPP4B	0.097444
APRT	0.0974095
WAPL	0.0973903
USP9X	0.0973135
ENSSSCG00000014094	0.0972957
UBE2J2	0.0972215
CPNE3	0.0972037
KIAA2026	0.0971548
ORC4	0.0971381
COIL	0.097114
MTCH1	0.09711
ENSSSCG00000025028	0.0970853
NAXD	0.0970223
C21orf91	0.0969466
CCSAP	0.0968631
NUDC	0.0968083
ELL	0.0967954
ENSSSCG00000031655	0.0967769
RIT1	0.0967311
DDX60	0.0967167
RIPK3	0.0966326
TIPRL	0.0965588
SPPL2A	0.0965297
[truncated: 12,388 more rows]

## Sheet: 0v4_Permutation
Supplementary File 11. Random forest pair-wise analyses of CD4+ αβ T-cell clusters. For each model represented below the porcine scRNA-seq cluster IDs compared are shown along with the parameters used and resulting OOB prediction error. Variable importance was assigned by measuring node impurity (Impurity) and using permutations (Permutation). Features that reduced error in predictive accuracy ar…
Gene	Permutation
ENSSSCG00000036618	0.0140823
TMSB10	0.0121626
COX1	0.00903337
GPX1	0.00889885
S100A6	0.00825538
S100A11	0.00796968
ENSSSCG00000037142	0.00636056
RPS3A	0.00560089
S100A4	0.00541149
S100A10	0.00507523
ITGB1	0.00479815
RPS16	0.00438835
ENSSSCG00000034617	0.0042899
UCP2	0.00404809
CD74	0.00375462
CCR7	0.00355846
COX2	0.00338886
ENSSSCG00000003042	0.00317877
ANXA2	0.00310259
RPL35	0.00258327
SRGN	0.00255656
ENSSSCG00000011272	0.00232062
ENSSSCG00000014855	0.00220671
RPL34	0.0021953
CD99	0.00206368
BST2	0.0020324
RPL6	0.00198214
SAT1	0.00195481
ISG20	0.001951
ENSSSCG00000035080	0.00191371
RPL23	0.0018909
ENSSSCG00000035768	0.00175859
LGALS1	0.00170304
SELL	0.00166505
ARHGDIB	0.00164961
ENSSSCG00000039544	0.001642
COX3	0.0016362
ENSSSCG00000004489	0.00158064
HLA.DRA	0.00156745
ENSSSCG00000040273	0.001564
VMP1	0.00150011
RPL9	0.00147911
MYL6	0.00147202
F2R	0.00146245
ENSSSCG00000003930	0.00145031
C15orf48	0.00143613
RPS27	0.0014235
RPL5	0.00137257
IL18R1	0.00127134
ACTG1	0.00126908
IKZF2	0.00126154
ENSSSCG00000006395	0.00125954
ENSSSCG00000038351	0.00121217
RPS23	0.00121211
ATP6	0.00115318
SLA.DQB1	0.00112709
MYO1F	0.00109674
SH3BGRL3	0.00102711
ENSSSCG00000001455	0.00102124
CXCR3	0.00100725
CCR4	0.000984115
B2M	0.00097289
LEF1	0.000926077
ENSSSCG00000014565	0.000908913
PLAC8	0.000899377
BTG1	0.000869167
RPL7	0.000867366
OSTF1	0.000857298
RPS5	0.000830999
LSP1	0.000823741
ENSSSCG00000035811	0.00079015
IFI6	0.00076776
RDX	0.000765412
PFN1	0.000764252
GZMK	0.000758968
MT3	0.000754224
ENSSSCG00000026140	0.000754174
CST7	0.000753016
ENSSSCG00000035507	0.00074902
RPL11	0.000714963
EML4	0.000679302
RPS13	0.000648141
ENSSSCG00000031088	0.000639644
CD8A	0.000637619
VIM	0.000637264
ARF6	0.000626787
ENSSSCG00000001229	0.000620555
AQP3	0.000596845
RPS15	0.000591989
ENSSSCG00000027573	0.000585924
RPL37	0.000562792
PLAAT3	0.00056079
SAMHD1	0.000554608
HSD11B1L	0.000554006
ENSSSCG00000025928	0.000550221
TCF7	0.000545373
ANGPT2	0.000521186
PABPC1	0.000507619
RGS10	0.000507514
ENSSSCG00000001341	0.000507011
ENSSSCG00000001456	0.000506572
ENSSSCG00000039071	0.000506043
RPL22	0.000494856
DUT	0.000490068
ENSSSCG00000012119	0.000489922
HINT1	0.000488632
ARPC3	0.000484923
ENSSSCG00000024973	0.000473721
PLP2	0.000473071
RPS11	0.000446567
RPL17.C18orf32	0.000440462
ACTB	0.000438562
TPT1	0.000431679
RPL10	0.000410136
ENSSSCG00000033019	0.000409686
ENSSSCG00000005453	0.000397761
EEF1B2	0.00039458
ENSSSCG00000011952	0.000393137
TRAT1	0.000386786
ENSSSCG00000036013	0.000383605
ENSSSCG00000000576	0.000377703
ENSSSCG00000033697	0.000374779
LTB	0.000356543
CTSW	0.00035631
ENSSSCG00000024974	0.000349325
RPS6	0.000348579
LAPTM5	0.000346575
ENSSSCG00000014569	0.000343217
RPS18	0.000342816
ITGA4	0.000333567
EMB	0.000327092
RACK1	0.000320174
LY96	0.000315888
ENSSSCG00000004945	0.000313416
ISG15	0.000307344
ENSSSCG00000037775	0.000307231
TSPO	0.00030454
ENSSSCG00000032556	0.000302878
ENSSSCG00000029596	0.000297197
HMGB2	0.000295782
ZBTB32	0.000292635
FADS3	0.000291779
CD69	0.000287883
S100A13	0.000285257
MAF	0.000278905
RPLP0	0.000278506
RPS9	0.000276281
PSMB9	0.000274973
GSTA4	0.000269924
CYTB	0.000267801
ENSSSCG00000006081	0.000263737
ENSSSCG00000013597	0.000255349
CALM1	0.000253819
ENSSSCG00000032003	0.000251528
STMN1	0.000240457
ENSSSCG00000004970	0.00023555
FLNA	0.000233833
ENSSSCG00000015447	0.000230586
CCL5	0.000229641
CAPG	0.000228049
RPS4X	0.000222159
CARD19	0.000221585
ENSSSCG00000017239	0.000220313
ENSSSCG00000030300	0.000219787
ENSSSCG00000035256	0.000218091
ARPC2	0.000209186
ENSSSCG00000011234	0.000203057
IRF5	0.000202122
ND4	0.000201564
EIF4A2	0.000200431
BATF	0.000199689
CD80	0.000198892
GLIPR2	0.000194368
PARVG	0.000194026
PTPRCAP	0.000192638
ENSSSCG00000020777	0.000191382
TMEM173	0.000190818
ENSSSCG00000033721	0.000189984
ARPC5L	0.000188974
ENSSSCG00000016903	0.000186769
LAG3	0.000184247
VAMP8	0.000183615
ENSSSCG00000020830	0.0001834
HSP90AA1	0.00018199
AHI1	0.000178934
CTLA4	0.000177427
RPL39	0.000171643
ENSSSCG00000004666	0.000170736
CGA	0.000169859
KXD1	0.00016331
RPS14	0.000163017
GNB2	0.000159523
RPS21	0.000157592
MRPS25	0.000157104
ENSSSCG00000009303	0.000154801
ENSSSCG00000000657	0.000153146
CD9	0.000152762
ENSSSCG00000013064	0.000149201
FAM129A	0.000146478
HMGN3	0.000142811
ANXA1	0.000142606
RAC2	0.000141101
DYNLL1	0.000140767
ENSSSCG00000008433	0.000139044
RPL3	0.00013898
ENSSSCG00000003914	0.00013715
ITM2C	0.000135168
SUSD3	0.000133954
GPR183	0.000131357
SMC4	0.000129035
ENSSSCG00000003253	0.000127633
ENSSSCG00000036114	0.000126238
ENSSSCG00000034019	0.000122309
IFITM3	0.000122019
CAP1	0.00011578
ENSSSCG00000038507	0.000115149
EVL	0.000114762
ENSSSCG00000027826	0.000113762
DYNLT3	0.000112782
ENSSSCG00000020790	0.000111403
ENSSSCG00000015664	0.000111102
RORC	0.000110464
PLXND1	0.000109788
RPL7A	0.000108224
CPD	0.000108093
ENSSSCG00000025499	0.000107717
TNFRSF1B	0.000105845
GCNT4	0.000105663
NKG7	0.00010515
HSPE1	0.000102714
EEF1D	0.000102511
PDK1	0.000102165
SMAP1	0.000101109
ENSSSCG00000007088	9.85443e-05
ENSSSCG00000017509	9.79795e-05
ENSSSCG00000018063	9.7729e-05
ENSSSCG00000036716	9.50815e-05
CAPZA1	9.44391e-05
SGCA	9.27115e-05
NPL	9.25138e-05
ENSSSCG00000039581	9.19953e-05
NUCKS1	9.11722e-05
RPS20	9.09675e-05
ENSSSCG00000031897	9.06597e-05
PTPN4	9.0321e-05
TNFAIP3	8.8098e-05
ARPC1B	8.59596e-05
ENSSSCG00000010203	8.54299e-05
CCDC50	8.53541e-05
IFIT1	8.50833e-05
H3F3A	8.36221e-05
MISP3	8.3096e-05
ENSSSCG00000001398	8.27718e-05
CD48	8.25879e-05
CPPED1	8.25801e-05
CD86	8.1724e-05
ITGB7	8.07236e-05
SOD1	8.05174e-05
IL2RB	7.98377e-05
RAP1A	7.9251e-05
SLAMF7	7.81745e-05
PDCD1LG2	7.77392e-05
BAX	7.65667e-05
NDFIP2	7.63802e-05
SDF4	7.60861e-05
CD52	7.6008e-05
PTPRC	7.51659e-05
EIF3K	7.43726e-05
LAMTOR2	7.32954e-05
HK3	7.3235e-05
FTL	7.24146e-05
RPS17	7.18244e-05
COX7A2	7.17856e-05
NPM1	7.17445e-05
UBC	7.16721e-05
ENSSSCG00000036296	7.12525e-05
ENSSSCG00000040118	7.00776e-05
ENSSSCG00000039460	6.99592e-05
TYMS	6.95929e-05
HERC5	6.90419e-05
EZR	6.87444e-05
ARRB2	6.86716e-05
STK17B	6.861e-05
COX8A	6.85343e-05
PSMB2	6.84645e-05
ANXA5	6.83748e-05
ZNF395	6.75281e-05
ENSSSCG00000039046	6.75216e-05
NDUFB10	6.74594e-05
ENSSSCG00000037364	6.70658e-05
GADD45A	6.65264e-05
RPL26	6.64471e-05
ENSSSCG00000033733	6.63081e-05
CNDP2	6.56985e-05
ENSSSCG00000004307	6.54962e-05
IL6ST	6.53217e-05
RAB11A	6.531e-05
LPCAT2	6.5009e-05
IPO11	6.48101e-05
CLTA	6.45261e-05
ENSSSCG00000033734	6.41931e-05
PSMB7	6.38466e-05
DPP4	6.35704e-05
CCR5	6.34866e-05
VPS28	6.18471e-05
LEPROTL1	6.03795e-05
CAPZB	6.03729e-05
ADAM19	6.01353e-05
SLC25A3	6.00953e-05
POMP	5.99757e-05
ENSSSCG00000033500	5.98534e-05
CD40LG	5.98062e-05
GZMM	5.88653e-05
GRB2	5.86434e-05
ENSSSCG00000037030	5.76501e-05
ENSSSCG00000036626	5.74638e-05
SSR4	5.72621e-05
ENSSSCG00000000071	5.69001e-05
ID2	5.67576e-05
SSBP4	5.66268e-05
CFL1	5.60848e-05
C1orf21	5.59625e-05
SERPINF1	5.59073e-05
RORA	5.57182e-05
IL10RA	5.53259e-05
REEP5	5.52771e-05
MNDA	5.52635e-05
HNRNPR	5.50256e-05
OAZ1	5.5022e-05
ENSSSCG00000016263	5.45591e-05
FLI1	5.421e-05
NREP	5.41167e-05
CXCL10	5.41026e-05
CDK2AP2	5.39694e-05
RPLP2	5.38423e-05
ENSSSCG00000027085	5.37372e-05
CCNG1	5.30251e-05
HSP90AB1	5.1938e-05
SLC1A4	5.1907e-05
PSMB8	5.18807e-05
RPS12	5.16929e-05
SLA.DMA	5.06593e-05
SELENOT	5.0517e-05
PFDN4	5.04907e-05
TMEM50A	4.92065e-05
ENSSSCG00000015337	4.91444e-05
LDLRAP1	4.90616e-05
UBE2L6	4.89873e-05
RGS19	4.89623e-05
PDCD1	4.86785e-05
EPSTI1	4.76875e-05
IL2RA	4.73074e-05
EMP3	4.71874e-05
TMEM160	4.71648e-05
LAX1	4.66314e-05
DYRK2	4.58375e-05
GZMB	4.58181e-05
ENSSSCG00000039582	4.55179e-05
ENSSSCG00000023158	4.5483e-05
SATB1	4.54064e-05
RILPL2	4.53721e-05
TBC1D20	4.51914e-05
ANGPTL1	4.47705e-05
NAPSA	4.45178e-05
LXN	4.44604e-05
TP53I13	4.41339e-05
PNRC1	4.41205e-05
CTSC	4.38283e-05
DDIT4	4.37335e-05
MRPL57	4.34437e-05
SF3B1	4.28333e-05
ENSSSCG00000004145	4.27646e-05
SAMD9	4.25884e-05
ENSSSCG00000017754	4.25883e-05
RSAD2	4.25441e-05
CCR2	4.24781e-05
ACP5	4.23909e-05
DAPK2	4.23794e-05
SRPK2	4.2366e-05
HSPA8	4.22942e-05
CYB5B	4.19994e-05
GABARAP	4.13806e-05
TUBA1B	4.12579e-05
ENSSSCG00000016262	4.12422e-05
ARHGDIA	4.11753e-05
UBXN1	4.1062e-05
TTC3	4.08463e-05
OPTN	4.0828e-05
ZNRF1	4.07486e-05
ATP5ME	4.04274e-05
RCAN3	4.01291e-05
CYBA	3.98339e-05
ENSSSCG00000000905	3.95093e-05
PLXNC1	3.93386e-05
FGL2	3.93325e-05
MX1	3.92562e-05
EIF1	3.91969e-05
MAP2K2	3.86353e-05
ATP6V1E1	3.77791e-05
STK26	3.76207e-05
ENSSSCG00000024696	3.76139e-05
ENSSSCG00000034709	3.74494e-05
COX5B	3.74318e-05
CAST	3.74247e-05
CD3E	3.73908e-05
MSN	3.73497e-05
RCSD1	3.72056e-05
PQLC3	3.63256e-05
ENSSSCG00000001779	3.6314e-05
VCL	3.60982e-05
ENSSSCG00000000273	3.59686e-05
LNPEP	3.59348e-05
COX17	3.57907e-05
PSMA6	3.57735e-05
ARHGAP9	3.56889e-05
MX2	3.56501e-05
UBL3	3.56493e-05
SDF2	3.54725e-05
TWF2	3.48373e-05
SRI	3.47694e-05
RPS26	3.44659e-05
PNISR	3.44176e-05
PHF11	3.44174e-05
ENSSSCG00000039407	3.43227e-05
ATP5MD	3.42984e-05
ENSSSCG00000010674	3.42964e-05
RHOC	3.42854e-05
GMFG	3.42784e-05
UPP1	3.42716e-05
SSR2	3.42594e-05
GOLPH3L	3.42344e-05
ENSSSCG00000001063	3.41985e-05
SRSF5	3.41906e-05
HNRNPU	3.41446e-05
SON	3.41214e-05
ENSSSCG00000022176	3.39671e-05
RTRAF	3.38795e-05
TPM4	3.37903e-05
KRTCAP2	3.28568e-05
ENSSSCG00000005658	3.2737e-05
EDF1	3.26656e-05
HNRNPLL	3.2619e-05
ENSSSCG00000021591	3.25532e-05
ENSSSCG00000032017	3.25441e-05
FUT7	3.24622e-05
ND1	3.23819e-05
COX6A1	3.14588e-05
UBXN11	3.13349e-05
TES	3.12579e-05
CHD3	3.12025e-05
ENSSSCG00000027840	3.11502e-05
EIF2AK4	3.1097e-05
ENSSSCG00000007188	3.09564e-05
LGALS3BP	3.09521e-05
FAR2	3.08515e-05
SKAP1	3.08216e-05
CINP	3.08212e-05
SAMD3	3.08157e-05
ZRANB2	3.07631e-05
LCK	3.06848e-05
ENSSSCG00000003691	3.06036e-05
LCN2	3.06033e-05
LPGAT1	3.04126e-05
ND3	3.03961e-05
CTSH	3.00086e-05
ETHE1	2.98249e-05
ENSSSCG00000033703	2.98114e-05
ENSSSCG00000031730	2.97599e-05
OCIAD1	2.97365e-05
SF3B2	2.9597e-05
ATP5F1C	2.95488e-05
HSH2D	2.95372e-05
ZFP36	2.95304e-05
CD2	2.9503e-05
TFRC	2.94291e-05
CDKN1B	2.93925e-05
CENPF	2.93781e-05
FAS	2.93736e-05
EGLN3	2.93533e-05
CDC26	2.92994e-05
SLC25A24	2.92125e-05
CLEC12A	2.91834e-05
SH3KBP1	2.91761e-05
ENSSSCG00000006418	2.91752e-05
EIF1B	2.91127e-05
ME2	2.88876e-05
CMPK2	2.88361e-05
ABLIM1	2.80654e-05
DDX5	2.80006e-05
IRF7	2.79474e-05
TMEM30A	2.79141e-05
IL27RA	2.7914e-05
AHNAK	2.7891e-05
ENSSSCG00000034448	2.78597e-05
FCN1	2.7847e-05
ACAP1	2.78252e-05
PRDX3	2.78027e-05
BTF3	2.77393e-05
CCT3	2.76867e-05
ENSSSCG00000013889	2.76702e-05
MAGT1	2.76653e-05
LIMD2	2.76012e-05
KLK7	2.75727e-05
NDUFV2	2.75317e-05
CHRAC1	2.75099e-05
BIN1	2.74015e-05
RPSA	2.72632e-05
TMEM154	2.66528e-05
ST6GALNAC4	2.64676e-05
IRF2	2.63638e-05
ZBTB20	2.63338e-05
RALGPS2	2.62713e-05
MAP3K5	2.62595e-05
ENSSSCG00000014893	2.62501e-05
SH2D1A	2.62175e-05
BAD	2.62084e-05
SEC62	2.61998e-05
CCSAP	2.61751e-05
WARS	2.61479e-05
PRKCSH	2.6139e-05
POLR2F	2.61321e-05
DDX18	2.61178e-05
TIGIT	2.61142e-05
IL6R	2.60914e-05
COX7C	2.60321e-05
CD44	2.60271e-05
STAT1	2.5997e-05
BPGM	2.59225e-05
PSME1	2.58925e-05
ECHS1	2.58287e-05
IK	2.47654e-05
CYC1	2.46989e-05
HP1BP3	2.46961e-05
PHTF2	2.46827e-05
TBK1	2.46624e-05
TGIF2.RAB5IF	2.46352e-05
ARPC5	2.4622e-05
POLR2G	2.45926e-05
ISCU	2.45827e-05
CCT2	2.45639e-05
WDR1	2.45496e-05
FYB1	2.45255e-05
CD53	2.45227e-05
COTL1	2.44854e-05
ENSSSCG00000036096	2.44673e-05
ANKRD10	2.44656e-05
PRXL2A	2.44557e-05
TC2N	2.44376e-05
FUNDC2	2.43922e-05
BRMS1	2.43638e-05
ACRBP	2.43422e-05
SLC25A5	2.43401e-05
PSMA3	2.42711e-05
CCR3	2.42604e-05
TPM3	2.39693e-05
ENSSSCG00000012178	2.32695e-05
JARID2	2.3219e-05
ELK4	2.31692e-05
MFSD10	2.31172e-05
ENSSSCG00000007203	2.31051e-05
PSIP1	2.30902e-05
SMNDC1	2.30684e-05
COX7A2L	2.30665e-05
SP110	2.30582e-05
SMPD2	2.30527e-05
ENSSSCG00000031140	2.30197e-05
RASGRP2	2.30135e-05
NDUFS8	2.29905e-05
HNRNPH1	2.29791e-05
EIF3H	2.29419e-05
UCHL3	2.29239e-05
PPP1CA	2.29096e-05
ATP5F1A	2.28983e-05
HNRNPDL	2.28921e-05
CHIC2	2.28826e-05
ENSSSCG00000016758	2.28818e-05
CALCOCO2	2.28695e-05
POLDIP3	2.28586e-05
ENSSSCG00000029830	2.28565e-05
MED21	2.28344e-05
CD3G	2.28195e-05
CD8B	2.28092e-05
ZFP36L2	2.27622e-05
TRIM22	2.27465e-05
CCNB1IP1	2.27013e-05
ENSSSCG00000040801	2.2665e-05
GPX4	2.26618e-05
ATP5PO	2.26571e-05
BZW1	2.26425e-05
ENSSSCG00000017928	2.25553e-05
NEK6	2.16785e-05
THYN1	2.16369e-05
DUSP1	2.16022e-05
S1PR1	2.15798e-05
GLIPR1	2.15157e-05
ENSSSCG00000032591	2.14871e-05
DOCK11	2.14621e-05
GNG2	2.14452e-05
ZKSCAN1	2.14449e-05
CCDC142	2.14184e-05
ATXN2L	2.14078e-05
ACADVL	2.13933e-05
NARS	2.1336e-05
RTN4	2.13123e-05
FCER1G	2.13012e-05
CWF19L2	2.12986e-05
GOLM1	2.12831e-05
PHYH	2.12814e-05
GTF2I	2.12677e-05
GCHFR	2.12563e-05
GSPT2	2.12398e-05
DDX21	2.12329e-05
ENSSSCG00000002351	2.12257e-05
TXNL1	2.12205e-05
ENSSSCG00000034314	2.12015e-05
FAM110D	2.11983e-05
CSK	2.11868e-05
CHD2	2.11769e-05
UBQLN1	2.11685e-05
ENSSSCG00000012916	2.11653e-05
PRPS1	2.11634e-05
CEND1	2.11421e-05
ENSSSCG00000000365	2.11407e-05
RAB2A	2.11306e-05
ATG12	2.10912e-05
CEP164	2.10686e-05
GLS	2.10294e-05
THEMIS	2.10279e-05
KAT6B	2.09444e-05
NKX3.1	2.09341e-05
RNASEH2B	2.08805e-05
CTSF	2.0781e-05
TMA7	2.07314e-05
MYO1G	2.07089e-05
ENSSSCG00000013315	2.03641e-05
ACTR2	1.99973e-05
TRAM1	1.99289e-05
ENSSSCG00000028097	1.99266e-05
TRMT112	1.99016e-05
ENSSSCG00000016687	1.9896e-05
GPI	1.9835e-05
TMEM11	1.98077e-05
RASA2	1.98054e-05
ATRX	1.97933e-05
TNFSF10	1.97926e-05
ENSSSCG00000006919	1.97759e-05
MRPS10	1.97735e-05
ATP5F1E	1.97405e-05
ENSSSCG00000032942	1.97366e-05
ATL3	1.9691e-05
PDE3B	1.96878e-05
HCLS1	1.96781e-05
PBX2	1.96622e-05
YIF1A	1.96595e-05
HMGA1	1.96582e-05
ASH1L	1.96412e-05
KDM1B	1.96403e-05
ENSSSCG00000036483	1.96163e-05
MPHOSPH8	1.95952e-05
SIT1	1.95922e-05
HIST1H1E	1.95795e-05
UCK1	1.95785e-05
BATF3	1.95753e-05
ATP6V0D1	1.95718e-05
EMP1	1.95688e-05
ENSSSCG00000033068	1.95657e-05
NOL7	1.95603e-05
TENT2	1.95485e-05
BIRC3	1.9533e-05
ENSSSCG00000031169	1.9487e-05
EMILIN2	1.94827e-05
TMEM258	1.94631e-05
FAM172A	1.94594e-05
CCND2	1.94398e-05
HBB	1.94132e-05
RUNX3	1.94008e-05
AGPAT5	1.94002e-05
PIAS1	1.93874e-05
COPB2	1.93631e-05
ENSSSCG00000001414	1.92869e-05
SLC4A7	1.92784e-05
ICOS	1.92613e-05
ENSSSCG00000002004	1.92111e-05
ENSSSCG00000036658	1.90846e-05
UBB	1.90441e-05
IFNAR1	1.86767e-05
ENSSSCG00000012397	1.86138e-05
CRLF3	1.86051e-05
NAXE	1.83842e-05
OGA	1.81807e-05
MAP1LC3B	1.81762e-05
BCAP31	1.81606e-05
APH1A	1.81562e-05
KDM7A	1.81277e-05
SKIL	1.81129e-05
ENSSSCG00000037071	1.80793e-05
BRK1	1.80753e-05
NPM2	1.80657e-05
SF3B6	1.80622e-05
JOSD2	1.80597e-05
NOP10	1.80523e-05
REV1	1.80429e-05
ILK	1.80377e-05
SPTLC2	1.80336e-05
BPTF	1.80294e-05
STAG1	1.8e-05
NFKBIA	1.79989e-05
CIRBP	1.79932e-05
SETDB2	1.79833e-05
2021-03-02	1.79691e-05
MRPL12	1.7967e-05
ENSSSCG00000040782	1.79577e-05
SULT2B1	1.79557e-05
SAMD13	1.79544e-05
FGD3	1.7951e-05
GLRX3	1.79396e-05
BABAM2	1.79314e-05
ENSSSCG00000011117	1.79243e-05
ERMARD	1.79155e-05
RBL2	1.79153e-05
ENSSSCG00000034896	1.79131e-05
SNRNP25	1.79054e-05
B4GALNT1	1.78995e-05
TNRC6B	1.78888e-05
NCL	1.78836e-05
CCDC146	1.78717e-05
KHDRBS1	1.78651e-05
ZNF70	1.78601e-05
ENSSSCG00000031152	1.78573e-05
ENSSSCG00000009673	1.78516e-05
TESC	1.78472e-05
NDUFV1	1.78443e-05
SIGIRR	1.78354e-05
PNN	1.78349e-05
ENSSSCG00000031655	1.78195e-05
ATP6V0B	1.77987e-05
RASSF5	1.77888e-05
UCHL5	1.77846e-05
RGCC	1.77833e-05
TNFAIP8	1.77735e-05
ENSSSCG00000016990	1.77715e-05
SKA2	1.77669e-05
LRRC70	1.77661e-05
UBASH3A	1.77488e-05
ENSSSCG00000014075	1.77345e-05
ITGAV	1.7732e-05
SYNGR2	1.77239e-05
NABP1	1.77138e-05
HNRNPC	1.7666e-05
KRCC1	1.76337e-05
2021-09-06	1.75992e-05
DDX24	1.75827e-05
SFT2D1	1.75805e-05
EIF3D	1.75545e-05
ERH	1.74401e-05
SPTSSA	1.6721e-05
ENSSSCG00000009770	1.66451e-05
EXOC3	1.6588e-05
DBI	1.6569e-05
TSPAN17	1.65369e-05
LMO4	1.65343e-05
PHB	1.65277e-05
RTCA	1.65253e-05
APP	1.65236e-05
TMEM98	1.65088e-05
ENSSSCG00000010795	1.65057e-05
NFIC	1.65033e-05
SF3B5	1.64965e-05
BCAP29	1.64776e-05
RTF1	1.6466e-05
HSD17B7	1.64659e-05
PARP1	1.64658e-05
GMPS	1.64632e-05
SPC24	1.6463e-05
ADH5	1.64521e-05
SUSD6	1.6448e-05
DHX36	1.64479e-05
ILF2	1.64417e-05
ENSSSCG00000038364	1.64356e-05
SDC4	1.64319e-05
ABI1	1.64276e-05
ENSSSCG00000014672	1.64104e-05
CPSF7	1.63963e-05
TBC1D2B	1.63933e-05
SRSF10	1.63866e-05
MEF2A	1.63734e-05
MDFIC	1.63726e-05
SLC38A2	1.63686e-05
SNF8	1.63634e-05
SLC25A6	1.6362e-05
DRAM2	1.6361e-05
RBMX	1.63574e-05
TECR	1.63538e-05
FTSJ1	1.63508e-05
GAPVD1	1.63495e-05
L3MBTL2	1.63416e-05
RAB31	1.63174e-05
EXOC6	1.63158e-05
TSNAX	1.63152e-05
CHD7	1.63063e-05
ZNF143	1.6303e-05
ENSSSCG00000005135	1.62985e-05
COPS2	1.62774e-05
ADORA2B	1.62767e-05
RNF103	1.62733e-05
ENSSSCG00000034540	1.62315e-05
PSMD13	1.62305e-05
SASH3	1.62274e-05
DECR2	1.62193e-05
CTR9	1.61986e-05
PRDX5	1.61758e-05
ENSSSCG00000017671	1.61729e-05
ENSSSCG00000027746	1.61621e-05
CLDND1	1.61112e-05
ENSSSCG00000035048	1.61032e-05
FIBP	1.6078e-05
SINHCAF	1.6072e-05
ENSSSCG00000011676	1.60078e-05
C12orf10	1.59821e-05
SERBP1	1.59582e-05
ENSSSCG00000013878	1.5865e-05
TRAPPC2L	1.51913e-05
ENSSSCG00000040056	1.5055e-05
MOB3A	1.50467e-05
GATA3	1.49789e-05
PTPN11	1.49299e-05
CFAP54	1.49082e-05
GPD1	1.48991e-05
FUS	1.48833e-05
AOAH	1.48825e-05
MAP4K2	1.48753e-05
RIC8A	1.48744e-05
ZC3H15	1.48716e-05
EMC2	1.48672e-05
DHRS11	1.48432e-05
ENSSSCG00000010517	1.4842e-05
HUS1	1.4835e-05
CBR4	1.48284e-05
RCHY1	1.48227e-05
SSR3	1.48134e-05
STAMBPL1	1.48119e-05
RRP1B	1.48108e-05
CAB39L	1.48103e-05
EMD	1.47991e-05
DNAJC19	1.47979e-05
ENSSSCG00000008452	1.47976e-05
ENSSSCG00000001505	1.47918e-05
TGFB1	1.47895e-05
TMC6	1.47817e-05
ELOVL5	1.47812e-05
TMEM9B	1.47699e-05
C9orf78	1.47684e-05
AKR1A1	1.47587e-05
SQSTM1	1.47564e-05
USF1	1.4751e-05
TASOR	1.47463e-05
COMMD5	1.47431e-05
NPC2	1.4733e-05
CSNK1G3	1.47328e-05
ENSSSCG00000007688	1.47291e-05
MFNG	1.4725e-05
TSEN34	1.47224e-05
ARID4A	1.4718e-05
HNRNPH2	1.47176e-05
ACP1	1.47167e-05
CREB3L1	1.47167e-05
PTBP1	1.47138e-05
PPP2R2A	1.47046e-05
PHB2	1.46991e-05
PPP2R1B	1.46979e-05
ARL14EP	1.46975e-05
RTCB	1.46918e-05
NGDN	1.46862e-05
ND5	1.46787e-05
SLC11A2	1.46726e-05
LY9	1.4668e-05
ENSSSCG00000013661	1.46659e-05
ENSSSCG00000032501	1.46634e-05
CASC4	1.46495e-05
AP3M1	1.46451e-05
RAP1GAP2	1.46352e-05
VAPB	1.46334e-05
PARP12	1.46289e-05
USP18	1.46267e-05
COPS6	1.46256e-05
KMT2E	1.46226e-05
P2RY10	1.46136e-05
PARVB	1.45977e-05
SSRP1	1.45961e-05
GON7	1.45892e-05
CTDSP1	1.45879e-05
TMC8	1.45739e-05
GNAI3	1.45669e-05
A4GALT	1.45604e-05
AHR	1.45544e-05
HK1	1.455e-05
HLF	1.45431e-05
EIF1AX	1.45409e-05
ENSSSCG00000036988	1.45317e-05
QKI	1.45297e-05
USP25	1.45186e-05
RAP2B	1.45157e-05
ADGRE5	1.45001e-05
DDX23	1.44913e-05
MRPL16	1.44537e-05
NDUFB9	1.44512e-05
ST3GAL2	1.44486e-05
OTULINL	1.44091e-05
CD28	1.44061e-05
ENSSSCG00000031117	1.43738e-05
ENSSSCG00000027232	1.43623e-05
LCP1	1.35559e-05
ENSSSCG00000013992	1.35489e-05
HYPK	1.35437e-05
CITED2	1.35028e-05
KLHL24	1.34627e-05
FBL	1.34494e-05
CHMP4B	1.34437e-05
ENSSSCG00000024313	1.34235e-05
ACSF2	1.34117e-05
ELL	1.34115e-05
HTATIP2	1.34058e-05
MAK16	1.33494e-05
TMEM9	1.33278e-05
CORO1C	1.33054e-05
FUNDC1	1.32934e-05
AIMP1	1.32749e-05
NDUFA8	1.32736e-05
IFI35	1.32675e-05
QSER1	1.32596e-05
HADHA	1.32522e-05
ELMO1	1.32503e-05
SPG21	1.32459e-05
RPA3	1.32229e-05
CANX	1.32075e-05
TMED10	1.32022e-05
ESF1	1.31967e-05
C1orf35	1.31965e-05
ENSSSCG00000006380	1.31933e-05
POLR2E	1.31927e-05
DRG1	1.31903e-05
MYL9	1.31901e-05
PLEKHA2	1.31872e-05
ARID5B	1.31861e-05
ZBED1	1.31655e-05
ARRDC3	1.31584e-05
MVP	1.31561e-05
CDK5RAP3	1.31523e-05
TAF11	1.31462e-05
H2AFJ	1.31418e-05
UQCC2	1.3139e-05
TMEM109	1.3137e-05
SUPT4H1	1.31366e-05
HMG20B	1.31362e-05
ATPSCKMT	1.31348e-05
DTNBP1	1.31339e-05
ENSSSCG00000000097	1.31298e-05
ENSSSCG00000000696	1.31274e-05
ATF7IP	1.31268e-05
ZC3H12D	1.31256e-05
GABARAPL2	1.31242e-05
FNIP2	1.31235e-05
MOV10	1.31203e-05
CC2D1B	1.31155e-05
ITM2A	1.31146e-05
RBM38	1.31127e-05
SNRPD1	1.31112e-05
NDUFS6	1.31085e-05
EDC4	1.31082e-05
HNRNPD	1.31045e-05
API5	1.31045e-05
RGS1	1.31011e-05
MMADHC	1.30996e-05
DCAF8	1.30995e-05
TNRC6A	1.30861e-05
NRP1	1.30847e-05
GIT2	1.3082e-05
ENSSSCG00000026064	1.30783e-05
OGFOD2	1.30751e-05
SERTAD1	1.30737e-05
ENSSSCG00000033594	1.30735e-05
RABEP1	1.30712e-05
CHST7	1.30686e-05
SNRNP27	1.30658e-05
GRK3	1.30583e-05
ENSSSCG00000023160	1.30422e-05
ENSSSCG00000023792	1.30413e-05
IFIT5	1.30397e-05
CHORDC1	1.30382e-05
BRD4	1.30362e-05
TMEM94	1.30326e-05
ENSA	1.30315e-05
NKTR	1.30257e-05
GOT2	1.30253e-05
AKAP7	1.30211e-05
SMG9	1.30193e-05
TMEM232	1.3016e-05
DNASE1L1	1.30145e-05
ENSSSCG00000001927	1.30125e-05
BRD9	1.30072e-05
PPP1CB	1.30067e-05
PDCD4	1.30033e-05
ENSSSCG00000028345	1.30022e-05
TM2D3	1.29986e-05
CAPN1	1.29963e-05
GEMIN6	1.29914e-05
CD3D	1.29905e-05
BZW2	1.29826e-05
YWHAQ	1.29738e-05
HNRNPH3	1.29733e-05
MAST3	1.29684e-05
SNRPD3	1.29619e-05
CD84	1.29372e-05
ENSSSCG00000015040	1.29336e-05
ATP5F1D	1.29315e-05
EMC9	1.29309e-05
COX6A2	1.29242e-05
CHID1	1.2923e-05
ENSSSCG00000009145	1.29205e-05
C5orf15	1.29173e-05
TAOK2	1.29126e-05
RABGAP1	1.29101e-05
ENSSSCG00000017165	1.29097e-05
ENSSSCG00000004081	1.29085e-05
SMYD2	1.29007e-05
TIMP1	1.29003e-05
CENPH	1.28999e-05
ATP5MC3	1.28603e-05
IFNGR2	1.28582e-05
ACTN1	1.2849e-05
TUBB4B	1.28363e-05
ENSSSCG00000033037	1.28243e-05
SUMO1	1.2746e-05
SPCS3	1.26063e-05
NDUFB2	1.24784e-05
UQCRC1	1.20045e-05
ENSSSCG00000034868	1.18077e-05
ENSSSCG00000006260	1.17873e-05
ZBTB38	1.16973e-05
CYTIP	1.16883e-05
ENSSSCG00000038444	1.16789e-05
IL7R	1.16715e-05
ENSSSCG00000023331	1.16652e-05
EIF2S2	1.16521e-05
KIF1BP	1.16404e-05
SART3	1.1635e-05
PGK1	1.16301e-05
EFHD2	1.16252e-05
GYPC	1.16249e-05
ENSSSCG00000037054	1.16187e-05
CDKN2C	1.16066e-05
STUB1	1.16065e-05
SLA.DMB	1.16034e-05
TMED9	1.16001e-05
DUSP11	1.15912e-05
LSM2	1.15749e-05
ENSSSCG00000006061	1.15729e-05
DLST	1.1572e-05
TLNRD1	1.15674e-05
ATP8	1.15673e-05
RPF2	1.15581e-05
ENSSSCG00000002907	1.15576e-05
FMNL3	1.15553e-05
ENSSSCG00000011290	1.1549e-05
FAM32A	1.15396e-05
G3BP1	1.15365e-05
L3MBTL3	1.15358e-05
MSL3	1.15335e-05
ITPK1	1.15307e-05
GPR174	1.15297e-05
ENSSSCG00000014997	1.15292e-05
PFKP	1.15266e-05
POU2AF1	1.1526e-05
SRA1	1.15256e-05
TRAK2	1.15104e-05
TRMT11	1.1508e-05
CCDC124	1.15065e-05
ELAVL1	1.15001e-05
KCTD20	1.14963e-05
ENSSSCG00000025593	1.14961e-05
ZNF330	1.14938e-05
POGLUT1	1.14874e-05
TIMM8B	1.14862e-05
RAD23A	1.14857e-05
ZNFX1	1.1485e-05
HSPA9	1.14849e-05
RANBP3	1.14837e-05
HIKESHI	1.14827e-05
ST3GAL6	1.14809e-05
CLPP	1.14803e-05
PBXIP1	1.14704e-05
KIF21B	1.14689e-05
STK19	1.14677e-05
ENSSSCG00000036491	1.14676e-05
ATXN2	1.14673e-05
ASNA1	1.14651e-05
MTG2	1.14566e-05
NUDC	1.14536e-05
CNIH1	1.145e-05
AHCY	1.14482e-05
BNIP3L	1.14471e-05
MFF	1.14457e-05
NCK1	1.14455e-05
RASGRP1	1.14451e-05
TBX21	1.1445e-05
VIRMA	1.14402e-05
LPAR6	1.14395e-05
TP53INP1	1.14362e-05
TNKS	1.14356e-05
EMC8	1.14354e-05
ZNRD2	1.14304e-05
CD47	1.14294e-05
ENSSSCG00000040060	1.14281e-05
MRPL36	1.14274e-05
MYO5A	1.14253e-05
STX11	1.14247e-05
MRPL43	1.14226e-05
BCLAF1	1.14218e-05
MIF	1.142e-05
TATDN3	1.14199e-05
ZBTB18	1.14174e-05
ZNF283	1.14173e-05
SLC2A6	1.14172e-05
NOSIP	1.14162e-05
ENSSSCG00000032748	1.1415e-05
ENSSSCG00000009241	1.1412e-05
ENSSSCG00000023603	1.14117e-05
ENSSSCG00000037971	1.14105e-05
NFKB1	1.14094e-05
OAZ2	1.14069e-05
SSH1	1.14057e-05
FOXS1	1.14044e-05
ENSSSCG00000008584	1.14027e-05
CCDC69	1.14026e-05
SLC7A6OS	1.14018e-05
ENSSSCG00000028695	1.14012e-05
TALDO1	1.13964e-05
NUFIP2	1.13947e-05
PPP1R18	1.13901e-05
DGKD	1.13889e-05
RAB18	1.13865e-05
VGLL4	1.13802e-05
TAOK1	1.13765e-05
CETN3	1.13749e-05
LPIN2	1.13731e-05
TMEM33	1.13717e-05
SH3GLB1	1.13643e-05
CLNS1A	1.13634e-05
KMT2C	1.13614e-05
STRBP	1.1358e-05
ENSSSCG00000035224	1.13568e-05
TGIF1	1.1356e-05
ZFAND2B	1.13557e-05
FHL3	1.13527e-05
TOMM34	1.1351e-05
MFAP1	1.13491e-05
ENSSSCG00000007253	1.13487e-05
NDUFA6	1.1348e-05
ENSSSCG00000024618	1.13456e-05
NUPR1	1.13446e-05
ENSSSCG00000004414	1.13446e-05
MRPS11	1.1344e-05
ATXN7L1	1.13439e-05
COPS7A	1.13432e-05
ETV6	1.13358e-05
ENSSSCG00000020870	1.13351e-05
MANF	1.13346e-05
MLLT11	1.13344e-05
EOMES	1.13334e-05
NXT1	1.13282e-05
UTP23	1.13234e-05
RAB7A	1.13233e-05
ELAC2	1.13229e-05
DDX3Y	1.13229e-05
DOHH	1.13206e-05
PTGER2	1.13142e-05
CCT7	1.1312e-05
RBM42	1.12978e-05
CDK6	1.12853e-05
PPP4R3B	1.12774e-05
ENSSSCG00000036257	1.12762e-05
ADORA2A	1.12696e-05
PHACTR2	1.12493e-05
ENSSSCG00000026354	1.12463e-05
HADHB	1.12454e-05
ASF1A	1.12453e-05
ENSSSCG00000034092	1.12371e-05
DNAJC8	1.1225e-05
CDC42EP3	1.12222e-05
CXCR4	1.12099e-05
PTPN22	1.1204e-05
DDX6	1.11713e-05
BAZ1A	1.11684e-05
COMMD4	1.1135e-05
ID3	1.11147e-05
ENSSSCG00000017940	1.1107e-05
ADAM15	1.10935e-05
EIF3E	1.04669e-05
ENSSSCG00000004415	1.01504e-05
MRPL52	1.01021e-05
TIMM29	1.00815e-05
ERP44	1.00716e-05
DHRS7	1.00576e-05
HERC6	1.00435e-05
SEC63	1.00261e-05
FABP3	1.00044e-05
MRPS18C	1.00038e-05
MLLT3	1.0003e-05
ENSSSCG00000016226	1.00027e-05
PPP2R3A	9.99986e-06
FOXN2	9.99662e-06
ENSSSCG00000014343	9.98509e-06
MFSD1	9.98343e-06
ENSSSCG00000037299	9.97764e-06
ENSSSCG00000037143	9.97629e-06
PPP1R11	9.97363e-06
SRSF2	9.97221e-06
PNPLA8	9.95906e-06
PIP5K1A	9.95815e-06
CCNDBP1	9.95269e-06
PPP1R10	9.95127e-06
PRDX2	9.95104e-06
COLGALT1	9.94951e-06
TIMM9	9.94512e-06
DUSP23	9.942e-06
IFIT2	9.93809e-06
MAP7D1	9.93021e-06
MYL4	9.9283e-06
GRAMD2B	9.9278e-06
ENSSSCG00000034711	9.91891e-06
MIB1	9.91819e-06
H2AFV	9.91338e-06
RAB10	9.91278e-06
RNF166	9.91245e-06
EIF4E	9.91222e-06
NUP88	9.91191e-06
KDELR2	9.90664e-06
RNH1	9.9054e-06
ZCCHC14	9.90386e-06
SOS2	9.90281e-06
MAP3K7	9.90125e-06
RHNO1	9.89447e-06
C3orf38	9.8928e-06
ENSSSCG00000036379	9.8919e-06
USP44	9.89077e-06
C14orf119	9.89016e-06
CHMP1A	9.88887e-06
ENSSSCG00000037602	9.88878e-06
SCCPDH	9.88388e-06
DUSP2	9.88134e-06
LSM12	9.87819e-06
RNF170	9.87713e-06
TLE3	9.87627e-06
2021-09-09	9.87262e-06
ENSSSCG00000031705	9.87058e-06
RPL36AL	9.86842e-06
CHURC1	9.86616e-06
CHMP5	9.86499e-06
SFPQ	9.86324e-06
MPHOSPH9	9.86309e-06
SCML4	9.86128e-06
MCMBP	9.861e-06
NOL9	9.85858e-06
GEMIN7	9.8582e-06
MAD2L1	9.85726e-06
ENSSSCG00000028663	9.85482e-06
ENSSSCG00000033757	9.85358e-06
TRAPPC6A	9.85308e-06
ATXN10	9.84834e-06
SNX12	9.84714e-06
DCUN1D1	9.84601e-06
MRPL48	9.84434e-06
TYSND1	9.84403e-06
PWWP3A	9.84136e-06
EHBP1	9.84027e-06
PGAP1	9.8393e-06
AFF4	9.8374e-06
TTPAL	9.83452e-06
TK2	9.83423e-06
SNX27	9.83253e-06
ENSSSCG00000028670	9.83098e-06
ZCCHC17	9.82936e-06
ENSSSCG00000036688	9.82772e-06
SULT1A3	9.82693e-06
ZMYM4	9.82605e-06
RPP21	9.82354e-06
MGAT5	9.82339e-06
IKZF5	9.82301e-06
MYDGF	9.82298e-06
IL16	9.82202e-06
REEP3	9.82075e-06
PRKCB	9.81811e-06
RABGEF1	9.81806e-06
GALK1	9.81799e-06
ENSSSCG00000021738	9.8178e-06
CUL1	9.81554e-06
RFC4	9.81391e-06
CYTH1	9.8136e-06
CEP192	9.81308e-06
ENSSSCG00000002898	9.8091e-06
SRRM2	9.80818e-06
ENSSSCG00000012166	9.80702e-06
PRDM1	9.8069e-06
MIEN1	9.80544e-06
DOC2A	9.80303e-06
PSMC2	9.80266e-06
ADAT2	9.80237e-06
TIMM10	9.79958e-06
SPPL2A	9.79908e-06
VCPKMT	9.79714e-06
NME2	9.79433e-06
SDCCAG8	9.79386e-06
CA5B	9.79242e-06
CRTAM	9.78965e-06
FAM217B	9.78777e-06
KIAA1109	9.78734e-06
ENSSSCG00000016096	9.7841e-06
ENSSSCG00000033786	9.78402e-06
GPN1	9.78254e-06
MRPL55	9.78128e-06
NAA25	9.77952e-06
TSPAN31	9.77794e-06
JADE2	9.77772e-06
ENSSSCG00000040294	9.77664e-06
ZNF827	9.77645e-06
PTGDR2	9.77502e-06
SRP54	9.77382e-06
ENSSSCG00000003903	9.77381e-06
CREB3	9.77232e-06
TCEA2	9.7697e-06
PTP4A1	9.76664e-06
KDELR1	9.76518e-06
YBX3	9.76438e-06
SURF4	9.76312e-06
RNMT	9.76287e-06
GPR34	9.76197e-06
ILKAP	9.75897e-06
UQCC3	9.75618e-06
CHST11	9.7545e-06
CRLS1	9.7531e-06
PIM2	9.75077e-06
ENSSSCG00000007978	9.74989e-06
SNTB2	9.74952e-06
ALDH3A2	9.74853e-06
GOLGA7	9.74835e-06
ZNF638	9.74826e-06
G3BP2	9.74539e-06
PPIF	9.74077e-06
UBTD1	9.73474e-06
ARGLU1	9.72756e-06
CLUAP1	9.71918e-06
TP53	9.71825e-06
SAFB2	9.71649e-06
POLR1C	9.71586e-06
YME1L1	9.71287e-06
ARID4B	9.7125e-06
RNASEL	9.7082e-06
C6orf203	9.70106e-06
LARP4B	9.69851e-06
PES1	9.6983e-06
LYST	9.69665e-06
PUS1	9.69522e-06
ENSSSCG00000000185	9.68816e-06
VDAC3	9.68649e-06
IDH2	9.68541e-06
IPO8	9.685e-06
TRRAP	9.68313e-06
PSENEN	9.68254e-06
EIF4B	9.68057e-06
ADGRG5	9.67916e-06
ENSSSCG00000016451	9.67864e-06
TOMM7	9.67777e-06
PLCL2	9.67328e-06
FBXL5	9.67098e-06
LY86	9.66843e-06
ATF4	9.66568e-06
ORAI3	9.66286e-06
ENSSSCG00000038359	9.65732e-06
ENSSSCG00000001407	9.65658e-06
AIG1	9.64889e-06
DDX49	9.64177e-06
CD5	9.64164e-06
PSMB3	9.63924e-06
KARS	9.60219e-06
CWC15	9.58316e-06
C11orf58	9.56517e-06
ENSSSCG00000040248	9.55946e-06
RCC2	9.5493e-06
TRPS1	9.54672e-06
CTNNB1	9.54611e-06
GSR	9.53835e-06
PIK3CD	9.53402e-06
RHEB	9.51078e-06
SLC35B1	9.50539e-06
RPUSD1	9.47972e-06
JAK1	9.47869e-06
SMAD2	9.47203e-06
SMPD1	9.38773e-06
ENSSSCG00000031580	9.3795e-06
SNX3	8.93227e-06
PRRC2C	8.57305e-06
TRAPPC5	8.55749e-06
ATP6V1G1	8.52379e-06
CRTC3	8.50567e-06
NDUFA1	8.50292e-06
LANCL2	8.49886e-06
YWHAZ	8.4952e-06
MCUB	8.48909e-06
FNBP4	8.45403e-06
ITK	8.4423e-06
ENSSSCG00000010931	8.42939e-06
HMGN2	8.42568e-06
ELF1	8.40982e-06
NIT2	8.39223e-06
RHOF	8.38377e-06
PRR14	8.36245e-06
ENSSSCG00000013596	8.35567e-06
FBXO9	8.35243e-06
ARHGAP4	8.3478e-06
MON1B	8.34763e-06
ENSSSCG00000032894	8.3463e-06
TNRC6C	8.34595e-06
ENSSSCG00000010158	8.3385e-06
POLR2K	8.33008e-06
TRAF1	8.32668e-06
NOTCH1	8.31834e-06
DDX42	8.31452e-06
ENSSSCG00000009341	8.31335e-06
ENSSSCG00000033987	8.30948e-06
SLCO3A1	8.30512e-06
DENND6A	8.30083e-06
LATS2	8.29478e-06
AGL	8.29053e-06
GSTK1	8.28503e-06
MRPL3	8.2839e-06
MYH9	8.28132e-06
ILF3	8.27956e-06
RING1	8.27418e-06
ARID5A	8.27387e-06
SNRPF	8.27294e-06
C7orf25	8.26457e-06
HEBP1	8.26142e-06
TMEM268	8.26013e-06
GTF2F1	8.25774e-06
ENSSSCG00000008576	8.25773e-06
TMEM185B	8.25755e-06
SMIM7	8.25517e-06
LYRM2	8.25472e-06
KBTBD8	8.25359e-06
BAZ1B	8.25228e-06
STAT4	8.2492e-06
TAF7	8.24812e-06
CLK3	8.24775e-06
ATP13A1	8.24754e-06
ENSSSCG00000039833	8.24696e-06
TANK	8.24627e-06
KMT5B	8.24587e-06
PUF60	8.24531e-06
DNASE2	8.24494e-06
MCPH1	8.24489e-06
ARSB	8.24482e-06
SF3A3	8.24383e-06
RAB1A	8.23753e-06
CD151	8.23712e-06
MRPS34	8.23234e-06
CCDC85B	8.2309e-06
LTO1	8.23001e-06
SNW1	8.22821e-06
AGFG1	8.22756e-06
GDI1	8.22463e-06
SERPINB6	8.22368e-06
ZNHIT1	8.22267e-06
UBA5	8.21747e-06
TSPAN14	8.21717e-06
SF1	8.21696e-06
ZFC3H1	8.21578e-06
LIN7C	8.21448e-06
MAIP1	8.21439e-06
INPP5D	8.21192e-06
PDE7A	8.21073e-06
ABHD11	8.21054e-06
RB1	8.20926e-06
ASAP1	8.20777e-06
ENSSSCG00000009926	8.20769e-06
TASOR2	8.20623e-06
RPN2	8.20531e-06
ENSSSCG00000008990	8.20419e-06
TRIM24	8.20279e-06
MZT1	8.2026e-06
IFT20	8.19996e-06
NISCH	8.19883e-06
ZNF628	8.1987e-06
ZNF789	8.19807e-06
RSL24D1	8.19675e-06
IKZF1	8.19661e-06
STIM1	8.19639e-06
SPCS1	8.19403e-06
IL10	8.19394e-06
SHOC2	8.19357e-06
CD63	8.19261e-06
DDX50	8.18952e-06
SYAP1	8.18829e-06
DALRD3	8.1879e-06
ENSSSCG00000011772	8.18778e-06
IL10RB	8.1866e-06
ENSSSCG00000035856	8.18596e-06
CEBPB	8.18485e-06
USP9X	8.18423e-06
NUDT5	8.18417e-06
EMG1	8.18409e-06
RLF	8.18339e-06
RRBP1	8.18251e-06
SHKBP1	8.18097e-06
SOD2	8.1808e-06
QRICH1	8.18079e-06
PSMD6	8.17881e-06
CIB1	8.17794e-06
SLC17A5	8.17663e-06
MRPL40	8.17601e-06
SH3BP5	8.17499e-06
ARHGEF2	8.1715e-06
TRPC3	8.16997e-06
ALDOC	8.16964e-06
TTLL12	8.16903e-06
MRPL54	8.16777e-06
BMPR2	8.16722e-06
DENND4C	8.16708e-06
TRIR	8.16595e-06
SNAPIN	8.16181e-06
DNMT3A	8.16169e-06
DCAF12	8.16153e-06
VPS25	8.16079e-06
CCPG1	8.16032e-06
LEMD2	8.15993e-06
PGRMC1	8.15964e-06
AP5Z1	8.15849e-06
VPS41	8.15803e-06
RPIA	8.15769e-06
RENBP	8.15661e-06
ETS1	8.15609e-06
ADPRHL2	8.15602e-06
AAMP	8.1556e-06
ENSSSCG00000021774	8.15322e-06
GIPC3	8.1527e-06
PRKD3	8.15233e-06
RIPK3	8.15223e-06
CHAC2	8.15166e-06
AAR2	8.15063e-06
DIAPH2	8.15063e-06
MRPL37	8.14868e-06
FAXDC2	8.14676e-06
DDA1	8.14632e-06
LY6E	8.14458e-06
SNAP29	8.14193e-06
TMPO	8.14151e-06
SIVA1	8.1412e-06
REEP4	8.13965e-06
HMCES	8.13937e-06
HSPA5	8.13892e-06
ZC3H7B	8.13822e-06
C1orf43	8.13817e-06
DHRS3	8.13737e-06
ARL4A	8.13735e-06
ATAD2B	8.13715e-06
RETNLB	8.13699e-06
ENSSSCG00000006984	8.13538e-06
PDS5B	8.1345e-06
CD37	8.13434e-06
CHMP2A	8.1338e-06
TBC1D31	8.13225e-06
ENSSSCG00000002529	8.13133e-06
NCOA1	8.13037e-06
LETM1	8.13013e-06
ENSSSCG00000035520	8.1295e-06
BCCIP	8.12945e-06
TRIB1	8.12874e-06
PTP4A2	8.12823e-06
TMEM184C	8.12622e-06
MAX	8.12524e-06
ENSSSCG00000011506	8.12507e-06
MBTPS1	8.12362e-06
JRKL	8.12094e-06
ENSSSCG00000014280	8.12003e-06
MAP2K3	8.11692e-06
PTPN7	8.11607e-06
SARDH	8.11435e-06
PDE6D	8.11414e-06
MTERF2	8.11405e-06
CAMK4	8.11385e-06
RPL7L1	8.11289e-06
GLA	8.11143e-06
BCL7C	8.1106e-06
TOM1	8.11059e-06
PRPF6	8.11002e-06
TSTD1	8.10982e-06
ENSSSCG00000029003	8.1089e-06
RBL1	8.10864e-06
ANAPC16	8.10853e-06
TPM1	8.10849e-06
NAV3	8.10294e-06
MAT2A	8.10279e-06
RSRP1	8.1026e-06
XPO6	8.10169e-06
PTPN6	8.10154e-06
TMEM14A	8.09933e-06
BEX3	8.09916e-06
RASGEF1B	8.09911e-06
ENSSSCG00000036083	8.09877e-06
MIA3	8.0959e-06
DAAM1	8.09276e-06
APBB1	8.09052e-06
SPG7	8.0902e-06
PEX7	8.0898e-06
PFKL	8.08945e-06
SSR1	8.0883e-06
ENSSSCG00000017555	8.08792e-06
DCPS	8.08789e-06
TBC1D10A	8.08645e-06
CNOT1	8.08545e-06
TFDP1	8.08541e-06
PI4K2B	8.08396e-06
ENSSSCG00000037885	8.08339e-06
SNRPE	8.08135e-06
SRRT	8.08071e-06
CHCHD5	8.08062e-06
DPH6	8.08016e-06
AP3D1	8.07601e-06
DNAJA1	8.07572e-06
YIPF3	8.07565e-06
RBM14	8.07442e-06
MTF2	8.07174e-06
ZFYVE19	8.06949e-06
IVNS1ABP	8.06905e-06
ZC3H14	8.06872e-06
RPS19BP1	8.06852e-06
DDX54	8.06703e-06
PSME4	8.0663e-06
ENSSSCG00000011329	8.06512e-06
UBR2	8.06304e-06
TNFSF12	8.06204e-06
FAM171B	8.06003e-06
FZR1	8.05881e-06
HPSE	8.05661e-06
MOBKL3	8.05601e-06
ENSSSCG00000031083	8.05482e-06
UBALD2	8.0512e-06
RRP8	8.04931e-06
PPM1K	8.04902e-06
WTAP	8.04323e-06
PPP2R5C	8.04269e-06
DPM1	8.04136e-06
ENSSSCG00000008170	8.0389e-06
NFATC2	8.03797e-06
LSM3	8.03678e-06
MRPS9	8.03478e-06
PIGY	8.03154e-06
AKAP8L	8.03131e-06
EIF5B	8.03109e-06
SNX16	8.03105e-06
ACOT13	8.03033e-06
PCGF3	8.02764e-06
VSIR	8.02208e-06
POLR2C	8.02162e-06
MAT2B	8.01486e-06
NDUFB4	8.00926e-06
MIS12	8.00506e-06
ENSSSCG00000030478	7.98013e-06
FBXW7	7.97679e-06
FNIP1	7.96813e-06
RBM25	7.95338e-06
EEF1AKMT1	7.94979e-06
POLR2B	7.94729e-06
ETV7	7.94621e-06
SLTM	7.9341e-06
ENSSSCG00000008274	7.93008e-06
IFI44	7.92812e-06
RBPJ	7.92461e-06
CNOT3	7.90002e-06
ENSSSCG00000035869	7.89751e-06
ENSSSCG00000022912	7.87715e-06
SUMO2	7.87191e-06
PFDN1	7.86421e-06
PDLIM7	7.84484e-06
APRT	7.82481e-06
ENSSSCG00000031530	7.7945e-06
ENSSSCG00000037595	7.78468e-06
ATP5MC1	7.38313e-06
PTBP3	7.13203e-06
TM9SF2	6.84466e-06
MUL1	6.7996e-06
ETFRF1	6.7556e-06
CAMKK2	6.74218e-06
PSMD14	6.74198e-06
GTF2B	6.73922e-06
POLE4	6.73851e-06
B3GAT3	6.73577e-06
GLUD1	6.73569e-06
TDRD3	6.73322e-06
PSMG3	6.73141e-06
NR4A2	6.73036e-06
H2AFY	6.72497e-06
CCDC86	6.72456e-06
PNRC2	6.72133e-06
RCN2	6.72081e-06
PABPN1	6.71274e-06
SRR	6.70281e-06
DERL1	6.6995e-06
UTP6	6.69628e-06
THOC2	6.69354e-06
IQGAP2	6.69118e-06
WAPL	6.68567e-06
GPR108	6.68185e-06
SIRT7	6.67739e-06
HIF1AN	6.67661e-06
STX7	6.6754e-06
EPHB6	6.67225e-06
NOLC1	6.66988e-06
ENSSSCG00000004392	6.66976e-06
CMAS	6.66318e-06
MAP1LC3A	6.66187e-06
PITRM1	6.6604e-06
LAT2	6.65927e-06
STXBP2	6.65797e-06
NBR1	6.65763e-06
FBXL17	6.65592e-06
C19orf53	6.65568e-06
LAMTOR1	6.65553e-06
STAM2	6.65214e-06
TNFRSF1A	6.65004e-06
ZC3HAV1	6.64801e-06
EMC10	6.646e-06
RNF169	6.64354e-06
ADRM1	6.64017e-06
TMEM74	6.63811e-06
ENSSSCG00000009419	6.63628e-06
ENSSSCG00000037969	6.63591e-06
ENSSSCG00000022906	6.63514e-06
ZC3H8	6.63447e-06
PEPD	6.63437e-06
CKS2	6.6339e-06
FOS	6.62804e-06
KBTBD2	6.628e-06
IFNG	6.62695e-06
PTPN1	6.62668e-06
CLTB	6.62422e-06
SCFD1	6.62207e-06
JAK3	6.62038e-06
ABCF1	6.61946e-06
EIF2B3	6.61867e-06
ENSSSCG00000016735	6.6172e-06
GATAD2A	6.61401e-06
DFFB	6.61308e-06
FBXO39	6.61305e-06
AQP11	6.61218e-06
TRAF6	6.61167e-06
IVD	6.61027e-06
CDKN2AIPNL	6.60797e-06
CCDC34	6.60777e-06
ENSSSCG00000038960	6.60616e-06
LMBR1L	6.60604e-06
IWS1	6.60576e-06
ACOXL	6.60282e-06
CIR1	6.60166e-06
NAXD	6.60139e-06
NDUFAF8	6.60134e-06
ZNF148	6.60088e-06
POLD1	6.59967e-06
SCAPER	6.59876e-06
ENSSSCG00000003771	6.59747e-06
LSM14B	6.59525e-06
GCC2	6.59458e-06
STXBP5L	6.59418e-06
BSDC1	6.59302e-06
LONP2	6.58986e-06
ENSSSCG00000002723	6.58886e-06
TPRG1L	6.5888e-06
SAR1A	6.5886e-06
MEAF6	6.58828e-06
MLEC	6.58826e-06
ENSSSCG00000001075	6.58796e-06
FMNL1	6.58713e-06
ENSSSCG00000002935	6.58656e-06
GNAL	6.58618e-06
STAR	6.58616e-06
LDLRAD4	6.58593e-06
ECM2	6.58548e-06
MRPL28	6.58368e-06
SPTBN1	6.58313e-06
ZDHHC15	6.58312e-06
ENSSSCG00000026446	6.58232e-06
ACSL3	6.58214e-06
LARP4	6.5814e-06
CD6	6.58006e-06
NSMCE4A	6.57868e-06
CEP290	6.57721e-06
MRPL9	6.5767e-06
HIVEP2	6.57491e-06
OVCA2	6.57483e-06
CIZ1	6.57415e-06
MORC3	6.57355e-06
SESN1	6.57354e-06
SLC39A3	6.57354e-06
TOR1A	6.57348e-06
PGRMC2	6.57325e-06
RBBP4	6.57322e-06
ZNF282	6.57287e-06
RBBP6	6.572e-06
PRKACB	6.57e-06
CFAP20	6.5691e-06
TPRKB	6.56878e-06
NFE2L3	6.56862e-06
RIC1	6.56826e-06
SMURF2	6.56445e-06
METTL22	6.56281e-06
CDC37	6.5623e-06
ENSSSCG00000002841	6.55957e-06
ENSSSCG00000016211	6.55896e-06
ENSSSCG00000022925	6.55889e-06
ENSSSCG00000035645	6.55884e-06
ENSSSCG00000026498	6.55876e-06
CNST	6.55837e-06
GATAD1	6.55786e-06
CDKN2AIP	6.5567e-06
LSM1	6.55525e-06
DDX39B	6.55442e-06
CGAS	6.55419e-06
CTBP1	6.55391e-06
IPO13	6.5529e-06
UQCRQ	6.5529e-06
ST3GAL1	6.55263e-06
ENSSSCG00000022963	6.55181e-06
IKZF3	6.55136e-06
ENSSSCG00000029066	6.54944e-06
RNF2	6.5484e-06
WNK1	6.54766e-06
CCDC137	6.5475e-06
FTSJ3	6.54722e-06
CEPT1	6.54705e-06
ALKBH7	6.54694e-06
PPFIA3	6.54664e-06
SHPRH	6.54295e-06
PTRH2	6.54129e-06
USP1	6.54125e-06
MRPL2	6.53877e-06
CFAP97	6.53567e-06
TMEM131	6.53215e-06
ABHD16A	6.53125e-06
ENSSSCG00000017670	6.53107e-06
FEM1B	6.53085e-06
CHMP6	6.52566e-06
PROSER1	6.52513e-06
KLHL20	6.52508e-06
ENSSSCG00000005201	6.52453e-06
DLAT	6.52353e-06
IFNGR1	6.52349e-06
MRRF	6.52326e-06
XPA	6.52258e-06
MMS19	6.52159e-06
CABIN1	6.52135e-06
TMBIM1	6.52054e-06
ACOT4	6.51998e-06
ARHGAP1	6.51997e-06
CUL4B	6.51997e-06
TEX10	6.51949e-06
DNAJC2	6.51919e-06
ENSSSCG00000011764	6.51876e-06
TMUB2	6.51812e-06
NCF4	6.51779e-06
AGK	6.51639e-06
RICTOR	6.51576e-06
LIN9	6.5153e-06
SNX11	6.51518e-06
PPP6C	6.51497e-06
CCDC122	6.51493e-06
ZFP1	6.51466e-06
TGFBR1	6.51466e-06
NUDT21	6.51376e-06
RDH14	6.51344e-06
RNF139	6.51333e-06
CYB561A3	6.51333e-06
C5orf24	6.51282e-06
ENSSSCG00000036224	6.5117e-06
BET1	6.51154e-06
EVI2B	6.51094e-06
ALPK2	6.51085e-06
ENSSSCG00000008352	6.51017e-06
PARP9	6.51005e-06
MPZL3	6.50979e-06
ENSSSCG00000017983	6.50942e-06
FYCO1	6.50936e-06
EIF3F	6.50768e-06
ENSSSCG00000033787	6.50725e-06
DOCK10	6.50674e-06
RELA	6.50655e-06
CCDC167	6.50648e-06
PAIP1	6.50552e-06
PARP11	6.5052e-06
ARSA	6.50444e-06
TEX30	6.50272e-06
MLST8	6.50177e-06
PRELID1	6.50134e-06
NSD1	6.49885e-06
SMG1	6.49862e-06
ATG3	6.49825e-06
OSBPL9	6.49762e-06
RMC1	6.49645e-06
PHC2	6.49622e-06
TBCC	6.4962e-06
TRA2B	6.49592e-06
MAGI3	6.49545e-06
CYP51A1	6.49433e-06
MCM2	6.49423e-06
CRAT	6.49377e-06
DAZAP1	6.49051e-06
ABCB7	6.48996e-06
DNAJB2	6.48978e-06
CRYBG2	6.48848e-06
ENSSSCG00000023155	6.4884e-06
ERCC3	6.48796e-06
ENSSSCG00000028542	6.48707e-06
KIAA2026	6.48684e-06
RBM23	6.48542e-06
TMEM222	6.48426e-06
TAMM41	6.48112e-06
ALAD	6.4802e-06
WDR41	6.47929e-06
ENSSSCG00000017352	6.47892e-06
TNNI2	6.47856e-06
ERMP1	6.47848e-06
PIGM	6.47784e-06
MRPL19	6.47663e-06
ENSSSCG00000031172	6.47603e-06
APPL2	6.476e-06
NDUFA10	6.47559e-06
ENSSSCG00000039249	6.47535e-06
UTP3	6.47289e-06
TTC31	6.47149e-06
NCOA7	6.47103e-06
ENSSSCG00000040252	6.47041e-06
RAB4A	6.46998e-06
CTBP2	6.46797e-06
METTL8	6.46698e-06
LEMD3	6.4666e-06
THOC1	6.46615e-06
ENSSSCG00000022258	6.46601e-06
USP45	6.46414e-06
CTDSPL2	6.46342e-06
WFDC2	6.46335e-06
HECW2	6.46207e-06
BECN1	6.46145e-06
BOD1L1	6.4607e-06
PRKAG2	6.46055e-06
ENSSSCG00000017032	6.45979e-06
AASDHPPT	6.45911e-06
ANKLE2	6.45782e-06
SAMSN1	6.45755e-06
HVCN1	6.45682e-06
PIM1	6.45668e-06
DIMT1	6.45444e-06
SESN3	6.45439e-06
CDV3	6.45437e-06
TNFSF14	6.45353e-06
SAE1	6.45102e-06
ENSSSCG00000000849	6.44692e-06
ACADM	6.44275e-06
ARL6IP1	6.44271e-06
MGAT1	6.44147e-06
ZHX1	6.44122e-06
CDYL2	6.4411e-06
PREPL	6.43971e-06
TMOD3	6.43961e-06
NFKBIZ	6.43953e-06
LPIN1	6.4364e-06
MAP3K14	6.43609e-06
UFD1	6.43278e-06
ZNF146	6.43183e-06
R3HDM4	6.43143e-06
TMEM60	6.43115e-06
TAPBP	6.43095e-06
GDAP2	6.43078e-06
UBAP2	6.42958e-06
PRKAR2B	6.42727e-06
KAT6A	6.42725e-06
ETAA1	6.4257e-06
TLN1	6.42034e-06
ESYT2	6.41988e-06
PRKAB1	6.41953e-06
PPT1	6.41819e-06
PLVAP	6.41642e-06
AZI2	6.41601e-06
TIPARP	6.41548e-06
TSC22D3	6.41517e-06
IL4R	6.41509e-06
PSMD1	6.41222e-06
2021-09-11	6.41185e-06
GSN	6.4112e-06
GRN	6.40736e-06
ANKRD27	6.40475e-06
[truncated: 12,388 more rows]

## Sheet: 0v28_Impurity
Supplementary File 11. Random forest pair-wise analyses of CD4+ αβ T-cell clusters. For each model represented below the porcine scRNA-seq cluster IDs compared are shown along with the parameters used and resulting OOB prediction error. Variable importance was assigned by measuring node impurity (Impurity) and using permutations (Permutation). Features that reduced error in predictive accuracy ar…
Gene	Impurity
HMGB2	15.3365
TMSB10	10.2834
ENSSSCG00000034617	10.2133
PCLAF	8.77657
HMGN2	8.12982
BIRC5	7.93756
DUT	7.89318
ANXA2	7.2455
H2AFZ	7.18683
S100A10	6.99896
RPL37	6.8469
RPL11	6.83285
RPS27	6.70828
RPL34	6.37415
ENSSSCG00000003042	6.2479
RPL35	6.00247
ENSSSCG00000040273	5.70944
BTG1	5.64134
BST2	5.52672
CD99	5.29232
ENSSSCG00000005453	5.06045
SPC24	4.91346
RPS3A	4.90537
C15orf48	4.84283
ISG20	4.56827
TK1	4.51595
ENSSSCG00000039071	4.43589
STMN1	4.24315
ENSSSCG00000037142	4.13705
LMNB1	4.12803
S100A6	4.01707
ACTG1	3.99795
PLAAT3	3.95547
TPX2	3.94589
ENSSSCG00000009327	3.92967
ENSSSCG00000024776	3.8533
RPL23	3.80254
RPL9	3.76713
ENSSSCG00000035080	3.55183
RPS15	3.47691
ENSSSCG00000003930	3.46078
FABP3	3.37075
ENSSSCG00000035209	3.29599
DLGAP5	3.26502
MYO1F	3.25741
ENSSSCG00000035768	3.22836
CALM3	2.9545
ENSSSCG00000026302	2.90241
HIST1H2AG	2.86032
S100A11	2.79499
GPX1	2.68982
CLSPN	2.64976
ENSSSCG00000011272	2.63725
ENSSSCG00000025928	2.56678
HSD11B1L	2.56054
PLAC8	2.54502
UCP2	2.47927
DDX39A	2.40874
COX7A2	2.40776
H2AFV	2.3938
KIFC1	2.38025
ENSSSCG00000016903	2.36766
RPS16	2.32983
HINT1	2.25968
TYMS	2.2423
CCR7	2.22641
GAPDH	2.22419
RPS14	2.13064
ENSSSCG00000013597	2.09745
CENPA	2.0773
TNFRSF1B	2.06821
UHRF1	2.0648
IFI30	2.00413
ENSSSCG00000004666	1.97618
RPS9	1.92326
COX3	1.90814
AQP3	1.85059
COX1	1.84048
ENSSSCG00000039544	1.83855
ENSSSCG00000014855	1.82686
ENSSSCG00000017032	1.80272
FLNA	1.76676
ENSSSCG00000036618	1.76552
ENSSSCG00000006395	1.75805
VMP1	1.74723
ENSSSCG00000038507	1.74288
RPL6	1.73275
ENSSSCG00000034913	1.71595
PLP2	1.71426
ENSSSCG00000016737	1.64003
CENPE	1.6394
COX2	1.61622
ENSSSCG00000017239	1.61537
KIF15	1.57894
BATF	1.57192
ENSSSCG00000012119	1.54934
RPL10	1.53126
ENSSSCG00000003914	1.49744
RAN	1.49384
ENSSSCG00000035908	1.468
GZMK	1.45262
ENSSSCG00000036350	1.43194
RPA3	1.43158
CXCR3	1.41973
ENSSSCG00000031088	1.3958
PCNA	1.37563
CENPF	1.37099
ENSSSCG00000031117	1.36431
EZH2	1.33979
CDC20	1.31355
S100A4	1.26183
ENSSSCG00000037071	1.25508
BBS7	1.22543
MCM7	1.19559
ENSSSCG00000010954	1.18976
LAG3	1.15804
ASF1B	1.14618
LGALS1	1.14239
ATP5MC3	1.11923
POMP	1.10135
ARPC5L	1.08906
COX5B	1.08804
DYNLL1	1.07684
MCM6	1.06209
EEF1B2	1.05246
COX8A	1.0451
PTMA	1.02451
LAMTOR2	1.00083
ARHGDIB	0.97934
MT3	0.958812
TUBB	0.953526
SMC2	0.947321
DBI	0.928248
NUF2	0.915508
ENSSSCG00000034448	0.907308
ORC6	0.906642
MYBL2	0.894014
CD52	0.878199
ACTB	0.868352
ENSSSCG00000032003	0.854165
ITGB1	0.846274
NDC80	0.846083
CBX5	0.833137
CDKN3	0.829887
ZBTB32	0.819524
MCM4	0.815817
MCM5	0.814618
ENSSSCG00000026064	0.808396
CENPN	0.802867
ARHGDIA	0.799769
PFN1	0.793885
ENSSSCG00000035811	0.787936
TOP2A	0.767744
ENSSSCG00000027085	0.762463
HIST1H2AB	0.759259
UBE2C	0.746214
MCM3	0.736936
CCL5	0.736266
F2R	0.735212
RDX	0.716769
PIMREG	0.714377
CENPS	0.712681
YWHAQ	0.696558
RFC4	0.687194
MAD2L1	0.675185
ENSSSCG00000007088	0.662502
SNRPC	0.658095
ENSSSCG00000004489	0.651109
CYTB	0.649531
TUBA1B	0.648778
CFL1	0.624025
ENSSSCG00000031741	0.623801
SNRPF	0.619606
ENSSSCG00000000405	0.619443
ENSSSCG00000036296	0.614895
IKZF2	0.606616
VIM	0.602053
PSMB3	0.593969
CDK2AP2	0.592516
TXNDC17	0.589771
YKT6	0.567417
CCNB1	0.563596
NDUFB10	0.563069
ARPC2	0.556826
ZNF367	0.553689
ENSSSCG00000031730	0.550477
ENSSSCG00000015710	0.541092
CDCA8	0.53824
ARPC3	0.53807
MRPS25	0.537405
ENSSSCG00000036658	0.533313
E2F2	0.530052
ACTR2	0.523382
CKS1B	0.517864
SDF2L1	0.517729
PRDX3	0.516631
AP1S1	0.51514
CALM1	0.51476
ATP5PB	0.510286
PSMB9	0.500246
ENSSSCG00000020830	0.492027
LSM8	0.491301
CCNB2	0.488002
PFKP	0.487998
GON7	0.484857
TUBB4B	0.469704
LSM2	0.467738
CENPU	0.460241
DDX5	0.455284
ENSSSCG00000002907	0.454088
ND4	0.45127
RALY	0.44521
TRAT1	0.444555
RILPL2	0.439749
EIF3I	0.436055
NDUFB11	0.433416
RNPEP	0.42817
MYL6	0.425624
MYO1G	0.418443
ENSSSCG00000039582	0.415415
ENSSSCG00000010214	0.4132
SNRPE	0.412286
NDUFA10	0.407415
TIGIT	0.407358
GINS2	0.406839
CRELD2	0.406826
ENSSSCG00000027826	0.404289
GNB2	0.401358
ENSSSCG00000029830	0.400929
ENSSSCG00000012166	0.396288
PARVG	0.394203
HMMR	0.3934
CKS2	0.391224
OSTF1	0.389305
ENSSSCG00000006830	0.389057
PSMA7	0.387303
TPI1	0.385097
ELOC	0.384115
ENSSSCG00000007609	0.379615
ENSSSCG00000040857	0.377421
PLGRKT	0.375063
ENSSSCG00000034019	0.37149
CDKN2C	0.370455
EMB	0.368776
RPL26	0.366605
TCF19	0.363051
ENSSSCG00000008035	0.36059
ATAD2	0.35921
RPL22	0.355791
CCR5	0.35344
ENSSSCG00000012517	0.350397
SF3B6	0.349873
NDUFV2	0.349126
DUSP14	0.346961
ERH	0.340723
NDUFC1	0.339286
RPL7L1	0.338833
ORC1	0.338317
ENSSSCG00000017213	0.338126
ENSSSCG00000013064	0.33803
KIF11	0.335572
CYCS	0.334232
KIF4A	0.333928
SGO2	0.333555
GMNN	0.332347
PDCD5	0.331655
ENSSSCG00000030295	0.330344
RPS6	0.329659
DYNLRB1	0.328177
BUD31	0.327121
LAMTOR5	0.322827
HDGF	0.321249
TEX30	0.319631
SKA2	0.31838
ARRB2	0.316552
SIVA1	0.313652
ENSSSCG00000032556	0.310655
MAD2L2	0.310561
ENSSSCG00000038364	0.309779
HELLS	0.309497
LSP1	0.308937
COX17	0.307296
CD8A	0.306978
ENSSSCG00000034896	0.306894
CYB5B	0.306065
ENSSSCG00000000905	0.304631
ETHE1	0.303883
CDT1	0.300986
ENSSSCG00000034314	0.299435
RPL39	0.298613
GSR	0.296185
RFESD	0.294924
SEC61B	0.294878
NFKBIB	0.29265
SEC11A	0.291997
CD48	0.291861
ENSSSCG00000011952	0.291472
RPA2	0.289817
MRPL57	0.289052
CTLA4	0.287209
NT5C	0.285171
ENSSSCG00000032060	0.283785
GLIPR1	0.281542
NDUFB2	0.281487
PPM1G	0.280433
ENSSSCG00000013366	0.277377
ICOS	0.275032
RPS23	0.273216
PPP1CA	0.270806
ENSSSCG00000016100	0.269558
ENSSSCG00000036716	0.26944
TMEM123	0.268746
GLIPR2	0.268206
ATP6	0.267588
ENSSSCG00000029596	0.267541
PSMB8	0.266861
ACADM	0.264914
ALYREF	0.264612
NDUFB7	0.26386
SFT2D1	0.263587
SLC25A5	0.263182
TPM3	0.26317
IDH2	0.26059
TWF2	0.259153
ATP5ME	0.257218
PDCD1	0.256687
RBM42	0.255624
ENSSSCG00000037869	0.255111
NAA38	0.253385
MTFR2	0.251279
PCBD2	0.249018
PNISR	0.248774
CTSW	0.247809
COX6A1	0.241985
ENSSSCG00000037775	0.241973
ATAD5	0.241395
IQGAP2	0.240666
UCHL3	0.238875
ATRX	0.238591
RPL5	0.23846
ENSSSCG00000002550	0.237892
IL2RB	0.237003
ENSSSCG00000015447	0.236751
ENSSSCG00000024974	0.234906
MBD2	0.234244
ENSSSCG00000003903	0.233696
ARPC4	0.231467
ASPM	0.230766
ENSSSCG00000010320	0.229925
ENSSSCG00000004970	0.228335
ENSSSCG00000014569	0.228263
NDUFS8	0.227163
DIABLO	0.224472
RPS11	0.224124
PPIB	0.223275
RPL17.C18orf32	0.223259
CORO1A	0.221838
ATP5MD	0.220769
PPP1R18	0.219121
PDHB	0.218001
CCT3	0.216107
DNMT1	0.213533
PSMA3	0.213304
KNSTRN	0.21091
KPNA2	0.209168
RFC3	0.208026
TMEM258	0.207386
EIF4A2	0.204407
ENSSSCG00000035520	0.202704
ENSSSCG00000008170	0.201962
ENSSSCG00000000097	0.201885
ITGB2	0.201456
ENSSSCG00000033700	0.201131
RACK1	0.200824
TGIF2.RAB5IF	0.196058
ENSSSCG00000030300	0.195482
RIDA	0.195296
MND1	0.195181
ENSSSCG00000024973	0.194898
ENSSSCG00000032166	0.194494
PSMB1	0.193511
ENSSSCG00000013878	0.192642
MORF4L1	0.191865
CTSB	0.190408
RANBP1	0.189331
ENSSSCG00000018063	0.188553
ENSSSCG00000032946	0.187317
DEPDC1B	0.186399
ARF6	0.185538
ENSSSCG00000026140	0.185267
TBX21	0.183874
ENSSSCG00000023323	0.183741
COX7A2L	0.183251
RPS20	0.181503
ENSSSCG00000014031	0.180355
ETFA	0.180004
IFI6	0.179259
RPS5	0.178735
ENSSSCG00000038351	0.176898
RPL3	0.17671
ENSSSCG00000038711	0.176125
ENSSSCG00000023331	0.175401
NCAPG	0.174986
ENSSSCG00000015337	0.174054
ENSSSCG00000033757	0.173069
ZFP36L2	0.172883
EFHD2	0.169667
ATP5F1C	0.168588
HLA.DRA	0.167364
ENSSSCG00000014296	0.166061
FAM32A	0.165469
ENSSSCG00000000002	0.162996
EMC9	0.16229
TECR	0.161932
NKG7	0.16185
SNF8	0.161027
ENSSSCG00000039740	0.161005
EZR	0.160786
HDAC1	0.16025
MIEN1	0.159978
KIF20A	0.158911
TPM4	0.158762
ENSSSCG00000010203	0.158368
ENSSSCG00000020790	0.158128
CCDC167	0.157026
PSMA6	0.156182
PRR11	0.153365
SUCLG1	0.153229
SEC11C	0.152115
BCAP31	0.151717
IFNG	0.151294
PSMA4	0.150887
KIF2C	0.150808
RPLP0	0.149578
GNAI2	0.149437
KRTCAP2	0.149053
RPL7	0.148886
SRGN	0.147753
HMGN4	0.147323
WAS	0.146354
ENSSSCG00000033212	0.146251
KXD1	0.145064
ENSSSCG00000004969	0.144136
EIF2S2	0.143961
UQCRC1	0.14385
ENSSSCG00000000273	0.143552
SELL	0.142204
RAP1A	0.141749
ID2	0.141686
KIF22	0.14131
H3F3A	0.140432
ENSSSCG00000039107	0.140392
NDUFA6	0.139863
TPT1	0.139315
PABPC1	0.138465
ABLIM1	0.138202
MICOS13	0.13752
PSMB7	0.137392
NDUFB4	0.136717
SRSF5	0.136547
ENSSSCG00000036114	0.135717
PRDX4	0.135586
CAP1	0.135453
PKM	0.133888
ND1	0.133807
USP1	0.133175
COX7B	0.13181
ND3	0.130475
RBM8A	0.130125
TXN2	0.129492
ENO1	0.129015
ISG15	0.128911
HSPD1	0.128749
UNC119	0.128395
LCP1	0.127824
ENSSSCG00000004145	0.127529
ENSSSCG00000028485	0.127019
HSPA4L	0.12697
ARPC5	0.12615
FKBP5	0.125301
EMC3	0.125271
NDUFB9	0.125053
ENSSSCG00000008061	0.124935
SNRPD1	0.124841
SLC35B1	0.124708
TUBA4A	0.123558
PNN	0.122999
RAC2	0.122954
ENSSSCG00000011764	0.122609
LEF1	0.121848
NTAN1	0.119838
CD8B	0.118828
RCAN3	0.118521
UQCRQ	0.117152
SUPT4H1	0.116881
RBX1	0.116674
ENSSSCG00000027573	0.116475
SRSF7	0.116062
NRM	0.115975
CDCA7	0.114972
ENSSSCG00000014565	0.114668
NDUFA13	0.114507
TCF7	0.114429
SNRPA1	0.114289
MFAP1	0.113577
MICOS10	0.113459
ATP6V1F	0.113456
NUCKS1	0.113086
TSPO	0.112664
SMARCB1	0.112425
MCM2	0.111754
MELK	0.111648
CCT8	0.111241
RPS26	0.111174
ILF2	0.109149
RORC	0.109121
EVL	0.107846
AHCY	0.107779
PFDN2	0.107532
CHD3	0.106463
COX7C	0.103506
TMBIM6	0.103275
GZMB	0.103266
ENSSSCG00000023158	0.103208
PHF5A	0.103197
ENSSSCG00000007743	0.102712
WDR1	0.102703
CCNE2	0.102626
ENSSSCG00000039506	0.102192
CD6	0.101489
EML4	0.101411
TMEM160	0.101258
CD74	0.100658
NUDT21	0.0999614
SLC25A3	0.0996767
ENSSSCG00000014371	0.099138
PRDM1	0.0987997
GMFG	0.0987308
NDUFB6	0.0984602
NEK2	0.0977812
IL7R	0.0974612
HIGD2A	0.0970627
PTPRCAP	0.0961115
ENSSSCG00000012397	0.0953385
ND5	0.095031
TMEM50A	0.0947799
NDUFA11	0.0946273
RAD51	0.0946066
ENSSSCG00000012757	0.0938604
MXD3	0.0937954
ATP5PF	0.0932618
MYDGF	0.0918936
ENSSSCG00000034129	0.0917064
NCAPD2	0.0915525
PSMB2	0.0915379
CCR4	0.0910336
E2F8	0.0909103
H3F3B	0.0907104
CENPW	0.0905465
COX4I1	0.0901048
ENSSSCG00000033653	0.0895151
CIT	0.0891387
POLR1D	0.0889377
CENPH	0.0889083
ENSSSCG00000009303	0.0884543
MTHFD1	0.087924
CLTA	0.0878915
ENSSSCG00000003520	0.0875753
NME2	0.0870054
ENSSSCG00000006061	0.0867135
ENSSSCG00000016902	0.0866338
SH3BGRL3	0.0864261
AP2S1	0.086346
SNRPD3	0.086311
ARPC1B	0.0861666
ENSSSCG00000013052	0.0854455
PNRC1	0.085079
TALDO1	0.0850163
SSR4	0.0841617
ND2	0.0841538
ENSSSCG00000012961	0.0841037
OAZ1	0.0839531
CHAF1B	0.083866
CCDC50	0.0835465
FERMT3	0.0834411
POLR2G	0.0832838
AHI1	0.0832618
MAP3K1	0.0831414
SERBP1	0.0826632
ATP5MC1	0.0826399
ME2	0.082546
ENSSSCG00000007688	0.0824538
SGO1	0.0824278
ITGB7	0.0816908
SH2D1A	0.0815629
NAP1L1	0.0810763
ENSSSCG00000034527	0.0807711
SAP18	0.0805471
TMA7	0.0803758
FUS	0.0803692
IFITM3	0.0803591
RPS13	0.0801513
MAF	0.0799361
ARHGAP15	0.0797107
FH	0.0795622
MISP3	0.0793118
RPL7A	0.0787893
ARF4	0.0784706
ENSSSCG00000037030	0.0784017
ENSSSCG00000034709	0.0781011
ENSSSCG00000037602	0.0780333
C11orf58	0.0780054
ENSSSCG00000006081	0.0780039
SLBP	0.0778964
ENSSSCG00000000377	0.0777143
ENSSSCG00000026055	0.0776339
GALK1	0.0765765
NDUFS7	0.0765049
POLR2E	0.0762538
ARHGAP30	0.0759939
SURF4	0.0758487
ATP5IF1	0.0756464
ATP6V1E1	0.0756258
ROMO1	0.075247
ESCO2	0.0752369
NCAPG2	0.0751678
FAF1	0.0750424
MRPS12	0.0749859
CCNG1	0.0749843
ENSA	0.0742148
IMP4	0.0739134
CAPZA1	0.0734856
FBXO5	0.07346
ENSSSCG00000007493	0.0734505
SLC1A5	0.0733282
ENSSSCG00000003691	0.0732148
OASL	0.072819
COX5A	0.0727385
WTAP	0.0725933
POLR2F	0.0721151
TP53	0.0717634
LAP3	0.071547
CCT7	0.0715306
CD247	0.0712749
ENSSSCG00000040396	0.070887
PSMC5	0.0706601
ENSSSCG00000033744	0.0705327
PRDX6	0.0703833
CSK	0.0702013
CENPM	0.0696867
HP1BP3	0.069394
PKMYT1	0.069339
VASP	0.0690944
PSMB6	0.0687679
ENSSSCG00000031073	0.0679822
SKAP1	0.0676541
STUB1	0.0676483
LBR	0.067619
RHOG	0.0671892
CD69	0.0670996
ENSSSCG00000000576	0.0669233
GPR19	0.0668264
SMARCA5	0.0667343
CD3D	0.066687
FAAP24	0.066459
BDP1	0.0664383
TMEM11	0.0664377
MFF	0.0664084
HSP90AA1	0.0663622
CTSC	0.066171
TIMM8B	0.0661076
ENSSSCG00000033734	0.0660178
BARD1	0.0660064
HNRNPR	0.0657636
ANKRD10	0.0655077
ENSSSCG00000014618	0.0654541
FTL	0.0653986
NUP37	0.0653687
ENSSSCG00000013889	0.0653109
ENSSSCG00000035256	0.065218
ENSSSCG00000040118	0.0646307
RPS21	0.0645105
SLA.DQB1	0.0644962
GNG2	0.0640904
TBK1	0.0637626
GPI	0.0637462
HCST	0.0636557
PMPCB	0.0636313
PEX16	0.0634865
ENSSSCG00000039046	0.0632739
VAMP8	0.0632604
HNRNPK	0.0632398
IVNS1ABP	0.0631016
EIF3L	0.0629594
RPL26L1	0.0627898
SRSF2	0.0626996
ENSSSCG00000022912	0.0625225
2021-09-06	0.0621429
EEF2	0.0621245
NUB1	0.062001
PPP4C	0.061987
SMAP1	0.0618816
ENSSSCG00000022176	0.0617397
BAX	0.0613906
SCML4	0.0613163
COMT	0.0610382
CAMK4	0.06084
SUMO1	0.0607946
NDUFS6	0.0607825
TRAF3IP3	0.0606555
CSRP1	0.0603921
ENSSSCG00000001229	0.0601459
ENSSSCG00000037595	0.0600348
CDCA3	0.0600285
ENSSSCG00000028663	0.0597225
SLC9A3R1	0.0597089
FAXDC2	0.0596254
ZNRF1	0.059531
TIMM13	0.0594355
ALKBH7	0.0592542
RALA	0.0592099
ENSSSCG00000035686	0.0590657
NDUFA1	0.0590654
DAD1	0.0588559
ENSSSCG00000020777	0.0587535
B2M	0.0586368
ITGA4	0.0583383
ENSSSCG00000008183	0.0583114
TGFB1	0.0583087
KMT2E	0.0581676
RSRC2	0.0581045
JMJD1C	0.0580889
PSMD14	0.0578932
CDC45	0.0573637
CISD2	0.0572048
MDH1	0.0569046
ARL6IP1	0.0568169
ENSSSCG00000003849	0.0568054
PRIM2	0.0558674
RAB2A	0.0552169
RAB5C	0.0548241
CX3CR1	0.0547275
PDIA3	0.0546549
GUK1	0.054525
ENSSSCG00000013721	0.0544249
MPHOSPH8	0.0543666
ENSSSCG00000002004	0.0543494
ACOT13	0.0542746
MOSPD3	0.054149
HSPA8	0.0541156
ENSSSCG00000009851	0.0539996
UBE2V1	0.0538575
NOP53	0.0537627
LAPTM5	0.0536902
ENSSSCG00000037143	0.053623
CD86	0.0535652
CGA	0.0535409
HMOX2	0.0535203
ENSSSCG00000023792	0.0533498
TSC22D4	0.0529372
ENSSSCG00000001341	0.0529067
ENSSSCG00000038989	0.0529059
ENSSSCG00000017509	0.0528113
ENSSSCG00000011676	0.0527319
ENSSSCG00000004349	0.0526278
MIS18A	0.0524535
GUSB	0.052399
NAXE	0.0523454
PSMC4	0.052286
EPB41	0.0522696
AURKAIP1	0.052242
2021-09-07	0.0522073
CDCA7L	0.0519695
TMEM60	0.0517796
EOMES	0.0516452
HNRNPD	0.0516148
ZDHHC3	0.0515944
ENSSSCG00000001455	0.0513863
LAT	0.05131
SRSF9	0.0512739
SSR1	0.0512443
ORAI1	0.0511034
ENSSSCG00000011117	0.0510951
EIF4B	0.0510048
POU2AF1	0.0509977
CFDP1	0.0508005
PAK2	0.0507473
PRPF19	0.0507457
ATP6V0B	0.0506056
RPS4X	0.0505406
MCM10	0.0504862
EEF1D	0.0504827
SLC25A6	0.0504598
DTWD2	0.0504591
GPSM3	0.0503777
ENSSSCG00000033733	0.0503412
EIF1AX	0.0501827
C12orf57	0.0501243
LTB	0.0501164
TRAM1	0.0500061
IL10	0.049851
ENSSSCG00000023691	0.0498017
TP53RK	0.0497059
ENSSSCG00000027348	0.0494571
EMP3	0.0494255
ENSSSCG00000001396	0.0493574
SPTSSA	0.0492292
GNB1	0.0491114
GCHFR	0.0490995
2021-09-09	0.049026
ENSSSCG00000016758	0.0489989
PSAP	0.0489018
SPCS1	0.0488679
MAP2K2	0.048805
RBM39	0.0488043
ENSSSCG00000009673	0.0487163
STK26	0.0487149
CCT4	0.0486736
ECHS1	0.0486028
ENSSSCG00000000365	0.0484749
C16orf91	0.048467
SH3GLB1	0.0484341
CCR2	0.0484113
REL	0.0484108
ADAM19	0.0483943
UBE2L6	0.0483254
WBP1	0.0482213
CPSF4	0.0481859
ENSSSCG00000007826	0.0480962
ENSSSCG00000008433	0.0480461
RPSA	0.0479366
PSIP1	0.047875
FUNDC1	0.0478668
ADAT2	0.0477401
TMPO	0.0476945
NDUFAF3	0.0476814
HNRNPU	0.0476165
LIMD2	0.0475734
CD38	0.0475049
ETF1	0.04748
STK17B	0.0474575
NOL7	0.0474045
CKAP2	0.0472021
AKAP9	0.0469531
CAPZB	0.0469302
ENSSSCG00000034853	0.0468886
NCAPH	0.0467295
ENSSSCG00000004782	0.0466929
ENSSSCG00000033697	0.0466583
LRP10	0.0465219
WASF2	0.0465005
COX6C	0.0464105
POC1A	0.0463824
ENSSSCG00000025007	0.0463663
EMP1	0.0462932
PRKCB	0.0462641
RPL36AL	0.0461371
HBB	0.0460981
BRK1	0.0459667
SF3B5	0.0459311
ADCY3	0.0458355
TLNRD1	0.0458145
MESP1	0.0456293
ENSSSCG00000039249	0.0456201
PTPRC	0.0455085
2021-09-01	0.0454662
RHOC	0.0453341
RPL10A	0.0452609
ENSSSCG00000036083	0.0451962
ASH1L	0.0451392
COMMD5	0.0450208
YWHAB	0.0449878
CDKN2AIPNL	0.044882
YWHAH	0.0448642
GSTA4	0.0448472
COA3	0.0448388
IFI44L	0.0446397
SRP14	0.0445924
TRMT112	0.0443467
ENSSSCG00000006376	0.0443396
ENSSSCG00000001075	0.0442316
HSH2D	0.044197
PARK7	0.0441898
ARID4B	0.0441729
HSD17B10	0.0440561
ENSSSCG00000007355	0.0439796
PRRC2C	0.0438913
LMAN2	0.0438731
COMMD4	0.0437644
ENSSSCG00000027196	0.0437454
RTRAF	0.0436378
HNRNPC	0.0436353
EIF4H	0.0436202
CCRL2	0.0435994
ACP5	0.0433958
TNIP3	0.0432868
SAT2	0.0432253
ETS1	0.0431215
TOMM7	0.0431178
PNP	0.0430946
ENSSSCG00000040801	0.0430673
ENSSSCG00000009145	0.0428754
AOAH	0.0427354
SON	0.0427046
ACSL5	0.0426452
POLR2K	0.0426271
GLRX3	0.0425648
DDT	0.0424363
CSDE1	0.0424029
ENSSSCG00000003885	0.0423899
ARL4C	0.042172
ENSSSCG00000027491	0.0421692
RASAL3	0.042138
UFD1	0.0421298
ST6GALNAC4	0.0420835
GPR55	0.0420831
CD9	0.0420517
CIP2A	0.0420415
ENSSSCG00000008677	0.042011
PRPF40A	0.0419713
MMADHC	0.0419316
ENSSSCG00000036096	0.0419306
ENSSSCG00000031773	0.0418797
KHSRP	0.0418466
ENSSSCG00000039731	0.0417941
ZBTB24	0.04177
ARHGAP11A	0.0417424
CD2	0.0415903
CDK4	0.0415876
ENSSSCG00000011234	0.0414991
SKP1	0.04143
P4HB	0.0414252
RPS18	0.0414226
MGAT4A	0.0414194
PIGT	0.0413885
TFRC	0.0412646
MRPL20	0.0411841
ENSSSCG00000015040	0.041156
DARS	0.0411298
RALBP1	0.0410867
ENSSSCG00000021560	0.0410357
ENSSSCG00000016711	0.0410324
RLF	0.0409729
MRPL11	0.0408177
RPS17	0.0406852
EIF3H	0.0406501
MIF	0.0406053
PRR5L	0.0405814
ENSSSCG00000013596	0.040575
ENSSSCG00000033721	0.040517
ENSSSCG00000006665	0.0404962
SCAP	0.0404784
ENSSSCG00000021591	0.040471
PUF60	0.0404677
ATL3	0.040466
ENSSSCG00000033019	0.0404136
PBRM1	0.0403339
FOXN3	0.0402808
SSR2	0.0402732
LASP1	0.0402699
ENSSSCG00000034871	0.0402465
CDC37	0.0402284
ENSSSCG00000003261	0.0401877
ENSSSCG00000035728	0.0401583
ATP5F1E	0.0400128
LAMTOR4	0.039876
CALR	0.0398571
ADSS	0.0396411
HLF	0.0395174
SARNP	0.0394791
KRAS	0.0394248
ENSSSCG00000016990	0.0393899
ENSSSCG00000032382	0.0391882
PARPBP	0.03916
DDX17	0.0390533
MRPS10	0.0390366
MBNL1	0.0389532
HCLS1	0.0388889
TRA2B	0.0387296
PTK2B	0.0387279
ASPA	0.0386685
CHORDC1	0.0385811
RFXANK	0.0385696
TLE5	0.0383957
SNRPN	0.0383539
PPIG	0.0383406
UBE2S	0.0382519
NDFIP2	0.0379688
GTF2F2	0.0378994
ZNHIT6	0.0378916
FADS3	0.0378733
FMC1	0.0378463
ATP5PO	0.0377224
FAS	0.0376053
ENSSSCG00000000657	0.0375899
MRPS18A	0.0375539
SMAD2	0.0375041
ZC3H15	0.037437
ENSSSCG00000001934	0.0374163
ENSSSCG00000027907	0.0373806
UBL3	0.0373135
SDF4	0.0372984
EIF4E2	0.0372516
CTNNB1	0.0371156
ENSSSCG00000000697	0.0370244
DAZAP2	0.0370144
SOD1	0.0370046
CNBP	0.0369898
SYF2	0.0369702
ANGPT2	0.0369066
ENSSSCG00000038754	0.0368538
CAPG	0.0368215
SRSF3	0.0368102
KNTC1	0.0367459
ENSSSCG00000002790	0.0365541
BLOC1S1	0.036541
ROCK1	0.0365402
U2SURP	0.03652
ENSSSCG00000006418	0.0364292
ENSSSCG00000033814	0.0364171
NPC2	0.0362874
PHB	0.0361393
RASGRP2	0.0361289
TBCA	0.0361242
TXNIP	0.036005
PCMT1	0.0359868
AIMP2	0.0359479
UBB	0.0359413
CFLAR	0.0358735
ENSSSCG00000012178	0.0358429
MRPL48	0.0358323
CHEK2	0.0357653
MAP10	0.0357402
ENSSSCG00000013992	0.0357241
ENSSSCG00000033909	0.0357169
PTP4A1	0.0356933
MRPL22	0.0356577
ENSSSCG00000011798	0.035605
STX11	0.0356033
TNFAIP3	0.0355877
EIF3K	0.0355224
PPP2R1B	0.0355208
PFDN4	0.0354989
HSPA5	0.0354749
MEIOB	0.0354386
RGS13	0.0354113
ISCU	0.0354029
CBFB	0.0353863
THOC6	0.035337
HSP90AB1	0.0353357
GALE	0.0353251
RSU1	0.0352686
UQCRC2	0.0352417
ENSSSCG00000007188	0.035174
MAPKAP1	0.0350451
CD37	0.0350139
PPIH	0.0349687
SMPD2	0.0349184
ELOVL1	0.0349179
TMEM9B	0.0347844
DNAJC7	0.0347648
NFE2L3	0.0347473
NDUFS5	0.0347376
SPAG8	0.0346664
CHMP5	0.0346452
AKR1A1	0.0346273
ENSSSCG00000037431	0.0346205
NPM1	0.0346125
DCUN1D1	0.0346112
SMIM7	0.0345669
TIPRL	0.0345352
TP53INP1	0.0344937
FECH	0.0344899
P2RX7	0.0344766
IFIT5	0.0344673
NUP88	0.0344387
ENSSSCG00000038630	0.0343853
RAD23A	0.0343646
ILF3	0.034322
ENSSSCG00000001398	0.0343101
SASS6	0.0342996
TBL1XR1	0.034299
LRRC59	0.0342895
SHOC2	0.0342548
STAT4	0.0342425
DPM2	0.0342228
FYB1	0.0341894
RHOA	0.0339932
VTA1	0.033954
ENSSSCG00000010795	0.0338961
DHX15	0.0338623
2021-03-07	0.0337721
SLA.DMB	0.0337434
RPS12	0.0337413
CTSD	0.0335826
DNMT3A	0.0335505
EIF3D	0.0335105
FAM89A	0.0332847
PSMD3	0.0332836
DUSP11	0.0332157
SNX25	0.0331333
ENSSSCG00000023595	0.0330808
ENSSSCG00000027840	0.0330526
MAT2A	0.0330445
BID	0.0330067
UBXN2A	0.0330058
RPLP2	0.0329882
JDP2	0.0329707
MRPL13	0.0328109
R3HDM1	0.0327956
CD53	0.0327859
REEP5	0.0327395
PTBP1	0.03273
UCHL5	0.0327231
DCUN1D5	0.032667
POLR2I	0.032613
CDCA5	0.0325651
CNOT2	0.03255
BORA	0.0325399
ENSSSCG00000002505	0.0325362
ZRANB2	0.0325342
ENSSSCG00000001456	0.0325074
CD3G	0.0324936
CIAO2B	0.0324746
PRELID1	0.0324591
ENSSSCG00000038304	0.0323464
ENSSSCG00000036491	0.032283
ENSSSCG00000031912	0.0322432
UTP23	0.032232
ARF3	0.0322063
CLDND1	0.0322034
C5orf24	0.0321462
ATP6V1G1	0.0320401
ENSSSCG00000024263	0.032014
ENSSSCG00000030478	0.0319989
PAIP2	0.0319626
STAT1	0.0319168
TCEA1	0.0319144
GPR171	0.0319082
KLF2	0.0319026
ENSSSCG00000034190	0.0318761
MRPS6	0.0318623
ENSSSCG00000001097	0.0318397
RAP1B	0.0318286
ENSSSCG00000010855	0.0317624
ITPRIPL1	0.0317547
FUT7	0.0317493
FKBP3	0.0317491
DDX6	0.03174
TRIB2	0.031695
FAM192A	0.0316248
HAUS8	0.0315904
NCBP2	0.0314714
HSD17B12	0.0313424
FAM49B	0.031292
GPR34	0.0312741
SDHAF2	0.0311702
ENSSSCG00000037885	0.0311202
TKT	0.0310631
B4GALNT1	0.0310465
LRCH4	0.0310041
WAC	0.0309712
DENND1C	0.030971
RNF216	0.0308892
ENSSSCG00000014343	0.0308277
SRA1	0.030827
PRPF38A	0.0307981
PDAP1	0.0307408
KPNB1	0.0306836
SDHD	0.030675
NAA25	0.0306193
CDC6	0.0306047
TTC14	0.0305812
SDCBP	0.0305663
ENSSSCG00000014267	0.0305265
SLIRP	0.0305187
ENSSSCG00000013155	0.0305037
ENSSSCG00000010674	0.0304095
ENSSSCG00000006260	0.0304052
ENSSSCG00000024290	0.0303839
ENSSSCG00000035273	0.0303779
CTBP1	0.0302926
RRAD	0.0302674
ENSSSCG00000028695	0.0301645
BTF3	0.0301028
THUMPD2	0.0300887
FGL2	0.0300696
DCAF8	0.0300466
UPP1	0.0300335
ENSSSCG00000034868	0.0300065
IDH3B	0.02996
TPM2	0.0299207
SDHB	0.0298852
CACYBP	0.029856
FANCD2	0.0298542
DYNLT3	0.0298459
AAAS	0.0298359
CNOT6L	0.0297369
ENSSSCG00000005135	0.0297133
PLEK	0.0296967
GPSM2	0.0296317
UBE2K	0.0296302
COX11	0.0295846
TNRC6B	0.0295723
ENSSSCG00000013232	0.0295251
NAA20	0.0294467
CCDC69	0.0293538
ENSSSCG00000037054	0.0292634
APOBEC3B	0.0292583
CXCR4	0.0291947
PBXIP1	0.0291771
ECPAS	0.0291384
FAM120B	0.0291349
RACGAP1	0.0291319
ENSSSCG00000012916	0.0290835
ENSSSCG00000001696	0.0290731
SIMC1	0.0290553
WDR53	0.0290291
RTF2	0.0289872
CASP3	0.0289853
PPIF	0.0289773
ND4L	0.0289555
COMMD1	0.0289181
DCTN3	0.0288659
SYS1	0.0288642
PVRIG	0.0288445
SAMHD1	0.0288333
CHMP1A	0.0288325
MRPS22	0.0288117
PSENEN	0.0287822
ENSSSCG00000033880	0.028733
PSMC1	0.0286789
TRAPPC3	0.0286624
ENSSSCG00000027675	0.0286506
CENPJ	0.0285924
ENSSSCG00000038825	0.0285672
HNRNPDL	0.0285671
PSMB4	0.0285484
MTA2	0.0285254
PDE8A	0.0285205
ENSSSCG00000037655	0.028513
CENPT	0.028381
ALG13	0.0283509
DNAJC19	0.0283333
TBC1D17	0.0281482
RTF1	0.0280804
ENSSSCG00000002259	0.0280738
LNPEP	0.0280381
OSBPL8	0.0280306
ENSSSCG00000017928	0.0280047
POLE2	0.027996
SCAND1	0.0279785
ENSSSCG00000004963	0.0279726
ENSSSCG00000028397	0.0279463
ENSSSCG00000033987	0.027897
RNF19B	0.0278816
ALG5	0.0278271
LEPROTL1	0.0278081
PTGR1	0.0277996
PXK	0.0277418
CCDC146	0.0277181
ENSSSCG00000013661	0.0277006
CRNKL1	0.0276954
ALDH4A1	0.0276797
FGD3	0.0276087
TMEM259	0.0276076
C20orf96	0.0276016
ENSSSCG00000040556	0.0275894
ACTR10	0.0275853
NDUFS4	0.0275683
OTUB1	0.0275669
ENSSSCG00000031897	0.0275277
ATP5F1D	0.0275192
BCCIP	0.0274879
RCAN2	0.0274184
ENSSSCG00000032459	0.0273929
MTDH	0.0273923
ZMAT5	0.0272737
CYP51A1	0.0272636
NAA40	0.0272354
ENSSSCG00000036745	0.0272077
G6PD	0.0271935
CBL	0.0271884
ACOT7	0.0271813
TLR6	0.0271499
ENSSSCG00000030015	0.0271235
G3BP1	0.0271
PABPN1	0.0270552
ENSSSCG00000029857	0.0269884
ABHD12	0.0269595
SH2D2A	0.0269473
RER1	0.0269448
ATF6	0.0269394
GTF2I	0.0269275
UPB1	0.0269107
ACSS1	0.0268637
ENSSSCG00000033500	0.0267783
POLR2C	0.0267679
KCNJ2	0.0267069
CRBN	0.026683
ALG14	0.0266489
ZNF277	0.0265942
TRIM22	0.026586
RWDD4	0.026564
FAM50A	0.0265357
TM2D3	0.0265277
ENSSSCG00000025499	0.0265108
KIF5B	0.0265098
NEIL3	0.0265046
CHCHD3	0.0265035
ENSSSCG00000008057	0.0264956
SF3B1	0.0264913
ENSSSCG00000014280	0.0264786
IFIT1	0.0264613
UBE2A	0.0264178
CAPZA2	0.0264004
CD244	0.0263773
PARVB	0.0262864
CHIC2	0.0262806
EIF4G2	0.0262776
TIMM29	0.026251
PDK1	0.0262402
EIF1	0.026216
AACS	0.0262041
MRPS7	0.026199
ATF6B	0.0261638
CSTB	0.02615
LUC7L	0.0261462
HPF1	0.026119
ENSSSCG00000005518	0.0261169
PCSK7	0.0261155
SS18L2	0.0260683
PSMC6	0.0260663
DTYMK	0.0260546
CCND2	0.0260336
PRKCSH	0.0260265
IRF3	0.0260132
ENSSSCG00000037081	0.0259115
MED4	0.0258684
RBM22	0.0258556
URI1	0.0257713
PIGC	0.0257691
NRBF2	0.0257608
VPS29	0.0257463
CANX	0.025716
CHST15	0.0256925
PTPRA	0.0256886
SLX4	0.0256729
ENSSSCG00000010158	0.0256328
GSPT1	0.0255996
TAGAP	0.0255986
MOV10	0.0255688
RGS14	0.0255633
DYRK1A	0.0254653
PPP1CC	0.0254484
LIPA	0.0254394
DOT1L	0.0254193
TXNL4A	0.0253931
IDH3G	0.0253181
C12orf10	0.0253058
CNN2	0.0252982
CPSF6	0.0252952
SSR3	0.0252779
ANAPC16	0.0252605
C12orf45	0.0252381
FDX1	0.0252373
ZNF292	0.0252069
ENSSSCG00000040827	0.0251682
MKNK2	0.0251339
ENSSSCG00000001505	0.0251129
ENSSSCG00000038444	0.0251092
DBR1	0.0250874
AP1M1	0.0250785
SLC20A1	0.025063
ENSSSCG00000024791	0.0250589
ENSSSCG00000038359	0.0250017
CEP78	0.0249614
TSR3	0.0249608
CEP55	0.02496
RPS10.NUDT3	0.0248446
MRPS24	0.0248205
WRB	0.0248088
GOLM1	0.024805
STK39	0.0247855
UBE4A	0.0247595
ENSSSCG00000035869	0.0247229
SPCS3	0.0247164
CHID1	0.024676
SNRNP200	0.0246536
ACBD6	0.0246244
EIF3E	0.0246095
BRIX1	0.0246074
ENSSSCG00000010517	0.0245641
ENSSSCG00000017671	0.0245611
CDC123	0.0245476
CDC27	0.0245364
MLF2	0.0245121
KIAA2026	0.024487
ELK3	0.0244676
HYPK	0.0244637
MRPS18C	0.0244495
PQBP1	0.0244409
ANKRD12	0.0244146
ANAPC15	0.0243877
ROM1	0.0243675
TAF1D	0.0243395
ENSSSCG00000014075	0.0243302
FIP1L1	0.0243287
NANS	0.0243287
SREK1	0.0243266
GYG1	0.024287
MSN	0.0242839
ENSSSCG00000014850	0.0242751
NIPAL1	0.0242235
MYCBP2	0.0242135
PPIL1	0.0242031
DNAJC18	0.0241937
DDIT4	0.0241825
MIDN	0.0241731
URM1	0.0241525
ENSSSCG00000015434	0.024037
SEMA4D	0.0240369
ENSSSCG00000034866	0.024033
TIMM10	0.0240086
ENSSSCG00000003771	0.023988
CD3E	0.0239867
ENSSSCG00000027974	0.0239634
RAB27A	0.0239585
YTHDF2	0.0239412
GRAP2	0.0239304
ZNF827	0.0239019
ENSSSCG00000009934	0.0238865
CCNB1IP1	0.023843
EXOC4	0.0238115
RIPK3	0.0237837
KIAA1109	0.0237735
TANK	0.0237415
UFM1	0.0236698
PALM	0.0236667
RNPS1	0.0236526
PDE3B	0.023651
ZNF131	0.0236398
BZW2	0.0236353
CCS	0.0236352
KAT8	0.0236263
TXNDC15	0.023607
NOP10	0.023557
SLC35E1	0.0235507
ENSSSCG00000004081	0.0235485
GRB2	0.0235317
CUL5	0.0235208
TMEM134	0.0235114
DNM2	0.0234492
RHEBL1	0.0234428
COX15	0.0234332
TECTA	0.0234178
POLR2D	0.0233997
PRKACB	0.0233954
ENSSSCG00000016650	0.0233779
NEDD8	0.0233543
SOX5	0.0233367
POLR1C	0.0233231
TBC1D15	0.0233185
ENSSSCG00000000635	0.0232805
CD81	0.0232611
CGGBP1	0.0232212
SHCBP1	0.023191
PRCC	0.0231742
PKP3	0.0231526
ENSSSCG00000035544	0.0231338
SCAMP3	0.0231219
IL4R	0.0231167
INO80E	0.0231111
CARHSP1	0.0230401
EXOC1	0.0230205
HSD17B7	0.0229953
RNF145	0.0229222
SUDS3	0.0229035
RAD21	0.0228602
TTK	0.0228448
ARID2	0.0228409
NXT2	0.022833
MAP1LC3B	0.0227978
KATNB1	0.0227875
GRN	0.0227685
PRMT7	0.0227405
DUSP4	0.0227018
DALRD3	0.0226876
CDC14A	0.0226839
RBM41	0.0226491
PBK	0.0226438
UTP6	0.0226342
ENSSSCG00000004583	0.0226236
ENSSSCG00000038581	0.0226179
SSB	0.0225839
GDI1	0.0225769
MKKS	0.0225742
LSM6	0.0225638
RBBP4	0.022555
CDIPT	0.0225102
ERP29	0.022507
CXorf38	0.0225069
ABI1	0.0224864
SLC39A10	0.0224636
ZBTB38	0.0224528
CPD	0.0224512
CD84	0.0224469
RASA1	0.0224458
ATP6V1H	0.0224409
ISYNA1	0.0224151
CNP	0.0224139
DNASE1	0.022397
RPN1	0.0223646
UBQLN4	0.0223577
RNF149	0.0222835
SF3B2	0.0222707
SPOCK2	0.0222464
ITM2A	0.0222162
PAFAH2	0.0222154
IFNAR1	0.0222109
HNRNPH2	0.0222042
AASDHPPT	0.0221973
PYM1	0.0221849
MANF	0.0221697
MPC2	0.0221625
BIRC3	0.0221625
ENSSSCG00000007978	0.0221568
ENSSSCG00000004945	0.0221211
PRDM4	0.0221103
ENSSSCG00000005656	0.0221024
ENSSSCG00000000071	0.0220844
SMC3	0.0220288
ZNF580	0.0219728
SPTAN1	0.0219688
GPX4	0.0219581
NUP50	0.0219495
GIT2	0.0218922
CALCOCO2	0.0218786
RNH1	0.0218507
YY1	0.0218225
SH3KBP1	0.021812
ARAP3	0.0218038
SNU13	0.0217927
CENPO	0.0217508
PITHD1	0.02175
CAST	0.0217395
METAP2	0.0217258
ENSSSCG00000012264	0.0215949
SVIL	0.0215769
SUN2	0.0215643
ENSSSCG00000034110	0.0215582
ANXA1	0.0215384
WDR34	0.0215152
ZNF207	0.0215096
CSTF1	0.0214924
A4GALT	0.0214511
SAT1	0.02144
JAK1	0.0214341
PHGDH	0.0214283
CNOT9	0.0213867
RGS10	0.0213846
INPP4B	0.0213809
BRD9	0.0212997
TMOD3	0.0212868
ENSSSCG00000015499	0.0212664
HADH	0.0212509
CLIC6	0.0212035
ENSSSCG00000004414	0.0211962
ABT1	0.0211922
ENSSSCG00000038945	0.0211871
PIGP	0.0211793
MTX2	0.0211769
MFSD6	0.0211553
AUP1	0.0211468
ENSSSCG00000031774	0.0211382
BBX	0.0210908
PKN1	0.0210894
EIF4A1	0.0210829
CAPN1	0.0210784
ADGRE5	0.0210772
MEAF6	0.0210265
CREM	0.0209816
UBQLN1	0.0209447
ENSSSCG00000009770	0.0209261
SAR1B	0.0209059
ENSSSCG00000016041	0.0208971
ACP1	0.0208958
STK19	0.0208641
ELL3	0.0208258
CKB	0.0208053
CCT2	0.0208009
ENSSSCG00000027746	0.0207839
FABP5	0.0207671
TNFAIP8L1	0.0207642
CYTIP	0.0207465
ENSSSCG00000005658	0.0207359
FAR2	0.0207203
COMMD2	0.0207092
CRIPT	0.0207
DENND2D	0.0206985
CD151	0.020695
PPID	0.0206886
TUT4	0.020687
ENSSSCG00000028035	0.0206864
POLD3	0.0206847
EIF1B	0.0206582
TMEM59	0.0206476
UBTF	0.0206434
TOX4	0.0205959
NPLOC4	0.0205761
C20orf27	0.020571
NDFIP1	0.0205507
SERP1	0.0205067
UQCR10	0.020475
RTCB	0.0204728
TNFAIP8	0.0204222
GMDS	0.0204195
TMED4	0.0203927
VIRMA	0.0203736
SFXN1	0.0203635
CTSH	0.020326
EDEM2	0.0203232
TOP3A	0.0203228
UBE2V2	0.0203148
ENSSSCG00000025921	0.0203104
NSMCE4A	0.0202998
ENSSSCG00000003253	0.0202997
KRI1	0.0202947
YME1L1	0.0202667
VCL	0.0202642
ENSSSCG00000024313	0.0202542
ENSSSCG00000029066	0.020247
JAML	0.0202396
RSRP1	0.020194
NMT1	0.020172
CNIH1	0.0201705
NAA35	0.0201594
CEP192	0.0201477
ENSSSCG00000033366	0.0201293
UBXN1	0.0201107
ENSSSCG00000031152	0.0200741
IQGAP1	0.0200698
MOBKL3	0.0200595
CCDC59	0.0200346
REX1BD	0.0200081
UNC93B1	0.0199958
SNAPC5	0.0199926
ENSSSCG00000012693	0.0199299
MED30	0.0199242
SPINT2	0.0199115
CORO1C	0.0198939
RANGAP1	0.0198631
TRAF4	0.0198261
MED31	0.0198177
DPY19L4	0.0198094
CCR3	0.0198062
BEGAIN	0.0197524
PCF11	0.0197334
ENSSSCG00000035610	0.0197285
SLC9A8	0.0197249
SNAPC2	0.0197186
DDB1	0.0196961
DEPDC1	0.0196925
ZNF330	0.0196865
BICD2	0.0196686
RALGPS2	0.0196642
AIMP1	0.019658
ENSSSCG00000004008	0.0196506
LXN	0.0196261
FAM162A	0.0196091
GDI2	0.0196076
E2F4	0.0195717
NOP56	0.0195666
ENSSSCG00000004518	0.0195613
APEH	0.0195534
TBC1D2B	0.019551
ASNA1	0.0195463
S1PR5	0.0195334
SHISA4	0.0195147
KRCC1	0.0195127
ENSSSCG00000031751	0.0195044
ENSSSCG00000014997	0.0195041
ENSSSCG00000040357	0.019498
DNAJC10	0.0194939
SHISA5	0.0194936
ZNHIT1	0.0194921
TPD52L1	0.0194838
UMAD1	0.0194618
ZC3H7A	0.0194555
RMC1	0.0194542
CDCA2	0.0194437
ENTPD7	0.0194432
LZTS3	0.0194327
TLR10	0.0194236
LDB1	0.0194183
ENSSSCG00000005436	0.019381
PTGDR2	0.019367
ENSSSCG00000007031	0.0193392
HIKESHI	0.0193333
HADHB	0.01929
ENSSSCG00000015664	0.0192799
ENSSSCG00000038757	0.019265
ZNF146	0.0192637
LETMD1	0.019263
SAMD3	0.0192424
ANXA5	0.0192348
RPL27	0.0192245
PHACTR3	0.0192166
ACOT8	0.0192142
ENSSSCG00000018061	0.0191978
SETX	0.019194
NSRP1	0.0191867
ENSSSCG00000013453	0.0191839
SAFB2	0.0191833
ENSSSCG00000012811	0.0191825
LBH	0.019169
PTGES3	0.0191585
CWC27	0.0191479
KATNA1	0.0191474
ENSSSCG00000016226	0.0191282
VDAC3	0.0191238
CXCL10	0.019121
ZNF683	0.019109
ELP6	0.0191021
USP15	0.0190884
EIF3J	0.019075
SS18	0.0190633
STX10	0.0190447
CHCHD5	0.0190423
ESRRA	0.0190314
ENSSSCG00000013391	0.0190236
CWC15	0.0190139
TRMT6	0.0189978
ENSSSCG00000039368	0.0189883
SLC25A17	0.0189798
RBM26	0.0189743
FDXR	0.0189332
ADGRG5	0.018909
KLF3	0.0189048
ZFYVE27	0.0188922
TRIM56	0.0188919
ENSSSCG00000002449	0.0188891
PIAS4	0.0188888
BAZ2B	0.0188845
TRIM28	0.0188582
ENSSSCG00000003211	0.0188568
BYSL	0.0188544
ATXN7L2	0.0188449
CHD7	0.0188014
ANAPC13	0.018774
PDLIM7	0.0187736
TFDP2	0.0187381
ENSSSCG00000028097	0.0187363
CASP10	0.0187273
HBM	0.0187205
POLG	0.0187045
NLRC5	0.0186997
DPM3	0.0186827
ARL4A	0.0186449
PAQR4	0.0186445
RASSF3	0.0186419
APIP	0.0186413
FMR1	0.0186382
CRLF3	0.0186353
ENSSSCG00000000199	0.0186106
RGS19	0.018602
ENSSSCG00000035048	0.0185983
RAB11FIP2	0.0185925
CHD1	0.0185653
PCBP2	0.0185545
MALT1	0.0185494
MLST8	0.0185452
PRPF31	0.0185437
ELMO1	0.0185312
CDK2	0.0185174
ENSSSCG00000012654	0.0185116
ENSSSCG00000007253	0.0184909
BAG2	0.0184862
UBE2T	0.0184798
ENSSSCG00000037987	0.0184494
ENSSSCG00000039460	0.0184402
PSMF1	0.0184393
LAMP1	0.0184369
CHD9	0.0184352
MYL4	0.0184056
DAPL1	0.0183921
ENSSSCG00000015473	0.0183894
ATXN7L3B	0.0183882
CCNI	0.018386
COTL1	0.0183387
DKC1	0.0183194
FCER1G	0.0183148
BCLAF1	0.0182969
TPMT	0.0182837
BROX	0.0182726
CMAS	0.0182597
HOMER2	0.0182504
ZC3H12D	0.0182369
ATP6V0D1	0.0182291
ACAP1	0.0182212
TPRA1	0.0182071
BAK1	0.0181948
DYRK2	0.0181783
SEC62	0.0181764
LPIN2	0.0181672
ENSSSCG00000033566	0.018154
HCFC1R1	0.0181498
TFDP1	0.018149
UBC	0.0181325
TSN	0.0181069
RNF113A	0.0181059
CTPS2	0.018092
TCERG1	0.0180871
LEMD2	0.018087
TRIM27	0.0180855
TFAM	0.0180814
PWP1	0.0180785
NEDD1	0.0180781
CCDC90B	0.0180664
ENSSSCG00000040528	0.0180648
IP6K1	0.0180296
PSTPIP1	0.0180229
SYNRG	0.0179983
ENSSSCG00000005982	0.0179831
ZDHHC5	0.017981
TMEM98	0.0179775
GABARAP	0.017969
CCND3	0.0179323
ENSSSCG00000016475	0.0179263
TIMP1	0.01792
SEMA4A	0.0179105
RRP1B	0.0179087
CHRAC1	0.0179
MVP	0.0178879
ATP5F1A	0.0178586
ENSSSCG00000009625	0.0178397
LMAN1	0.0178351
NNT	0.0177877
SMC4	0.0177843
VPS4B	0.017746
ENSSSCG00000014540	0.0177449
SLC38A9	0.0177239
ETFB	0.0177159
PPFIBP1	0.0177125
TRAPPC2L	0.0177096
ZC3HAV1	0.0177037
GNG10	0.0176802
SLU7	0.0176793
DDC	0.0176666
CD2BP2	0.017655
NCK1	0.0176546
NEK4	0.0176449
ENSSSCG00000020686	0.0176118
MFSD1	0.0176103
CIB1	0.0175931
RCSD1	0.0175636
HELZ	0.0175376
TNIK	0.0175138
ATG3	0.0175033
PBDC1	0.0174984
PHB2	0.0174684
EXOSC3	0.0174554
SCARB1	0.0174509
CNOT7	0.0174502
IMMT	0.0174473
KDM2B	0.0174398
RAP2B	0.0174381
VAPB	0.0174103
HNRNPA3	0.017393
FKRP	0.0173733
CD63	0.0173692
EIF4E	0.0173429
MRPL38	0.0173419
DDX1	0.0173419
SNW1	0.0173286
TLE4	0.0172876
RNF114	0.0172615
SNX9	0.0172491
FKBP8	0.0172481
ERAP2	0.0172404
KBTBD3	0.0172229
TAZ	0.0172193
DPH2	0.0171876
RASA3	0.0171815
ITM2B	0.0171795
TMEM154	0.0171778
SLC38A2	0.017177
CHD8	0.0171749
NAA10	0.0171567
ENSSSCG00000014909	0.0171524
NEK11	0.0171338
ATP2B1	0.0171323
ENSSSCG00000009772	0.0171242
TENT5C	0.0171207
ENSSSCG00000008990	0.0171191
ENSSSCG00000032942	0.0171111
SPG21	0.0171041
ZNF713	0.0170785
COG6	0.0170628
SLC35B3	0.0170522
POLE4	0.0170202
SMCO4	0.0169931
TMEM173	0.0169899
TBC1D1	0.0169652
GHDC	0.0169416
ACAT2	0.0169333
PAK1IP1	0.0169243
CRADD	0.0168943
FXR1	0.0168889
MIOS	0.0168387
G3BP2	0.0168351
SMG7	0.0168229
MTIF2	0.0168065
NDUFA8	0.0168018
CITED2	0.0167884
EPSTI1	0.0167882
SPSB3	0.0167838
LY6E	0.0167778
PREX1	0.0167564
UBL4A	0.0167445
ENSSSCG00000038095	0.016743
HM13	0.0167079
ZBTB39	0.0166982
ZBTB2	0.0166961
ENSSSCG00000035762	0.0166942
TFPT	0.0166919
OAZ3	0.0166821
ATP23	0.0166154
PIGK	0.0166128
ADH5	0.0166078
DYRK3	0.0165873
BTBD1	0.0165787
YIPF3	0.0165512
GSS	0.0165471
ENSSSCG00000025593	0.0165273
MAPK1IP1L	0.0165177
PKIG	0.0165136
PRKACA	0.0165103
ENSSSCG00000039581	0.0165028
ABCB7	0.0164965
NEMF	0.0164874
DHRS11	0.0164869
WDR4	0.0164869
DDX27	0.0164817
DGCR8	0.0164741
KIAA1841	0.0164672
GATA3	0.016466
NAPEPLD	0.0164584
ATF1	0.0164448
SAE1	0.0164183
HYLS1	0.016418
SNRNP27	0.0164169
SELENOF	0.016415
TRMT1L	0.0164076
CBR3	0.0163639
RAB5A	0.0163586
FAM185A	0.016356
SIGIRR	0.0163467
TMED7	0.0163111
ENPP4	0.0162987
DDOST	0.0162713
RBPJ	0.0162671
SLC25A24	0.0162631
TXNDC5	0.0162548
TMA16	0.0162487
SCAF11	0.0162424
AP5Z1	0.0162407
HSF1	0.0162387
LCK	0.0162286
CCDC34	0.0162264
ARHGAP9	0.0162221
VRK2	0.0162182
MEPCE	0.0162136
ENSSSCG00000016464	0.0162043
SFPQ	0.0162
PELP1	0.0161982
RBM17	0.0161978
ENSSSCG00000007947	0.0161832
TWISTNB	0.0161792
NDUFC2	0.0161537
TMEM62	0.0161499
ENSSSCG00000001414	0.0161348
DHRS4	0.0161333
SAMM50	0.0161319
MNDA	0.016129
IBTK	0.0160963
VRK1	0.0160888
MRPL24	0.0160794
PTP4A2	0.0160648
ENSSSCG00000009692	0.0160476
LTN1	0.0160435
PLIN3	0.0160418
SASH3	0.0160403
C14orf119	0.0160006
PNPLA2	0.0159727
HSBP1	0.0159557
SEC61A1	0.0159357
STK4	0.0159295
[truncated: 12,388 more rows]

## Sheet: 0v28_Permutation
Supplementary File 11. Random forest pair-wise analyses of CD4+ αβ T-cell clusters. For each model represented below the porcine scRNA-seq cluster IDs compared are shown along with the parameters used and resulting OOB prediction error. Variable importance was assigned by measuring node impurity (Impurity) and using permutations (Permutation). Features that reduced error in predictive accuracy ar…
Gene	Permutation
TMSB10	0.0120672
HMGB2	0.010331
PCLAF	0.00540978
HMGN2	0.00534687
DUT	0.00393187
RPS27	0.00340255
ENSSSCG00000034617	0.00317032
H2AFZ	0.00286593
ENSSSCG00000037142	0.00286133
ENSSSCG00000040273	0.00281652
BIRC5	0.0025674
RPL35	0.00249381
RPL34	0.00248158
S100A10	0.00244193
ENSSSCG00000003042	0.00242883
ACTG1	0.00230483
SPC24	0.00210811
TPX2	0.00202182
BTG1	0.00198514
RPL23	0.00192331
RPS3A	0.0018453
ANXA2	0.00180419
ENSSSCG00000011272	0.00177506
RPL11	0.00167685
ENSSSCG00000035080	0.00162384
STMN1	0.00157599
RPL9	0.00156388
S100A6	0.0015622
S100A11	0.00153633
RPL37	0.00152408
ENSSSCG00000016903	0.00152338
CENPA	0.00151641
ENSSSCG00000039071	0.00149024
DLGAP5	0.00145933
MYBL2	0.00141922
ENSSSCG00000026302	0.00137605
ENSSSCG00000035768	0.00134138
TK1	0.00133698
C15orf48	0.00130419
ENSSSCG00000009327	0.00129993
RPS16	0.00127045
HSD11B1L	0.00120796
ENSSSCG00000005453	0.00115942
PLAAT3	0.00115927
BST2	0.00110315
ENSSSCG00000003930	0.00102969
AQP3	0.00102265
KIF15	0.000986565
RPS14	0.000972904
ISG20	0.000967478
GZMK	0.000862318
ENSSSCG00000014855	0.000849485
ENSSSCG00000012119	0.000836055
CCR7	0.00083183
CDC20	0.000815584
RPS9	0.000813172
UHRF1	0.000794752
LGALS1	0.000790692
KIF11	0.000776607
ENSSSCG00000024776	0.000757898
KIFC1	0.000734446
ENSSSCG00000031741	0.000726724
ENSSSCG00000039544	0.00072561
NDC80	0.000719183
RPS15	0.000715547
CD99	0.000710386
GPX1	0.000702988
ENSSSCG00000035209	0.000702268
H2AFV	0.000697984
RPL6	0.000693856
ENSSSCG00000035908	0.000691472
LMNB1	0.000681123
COX2	0.00064132
UBE2C	0.000638439
UCP2	0.00061609
ENSSSCG00000025928	0.000603888
COX7A2	0.000599713
CCL5	0.000598642
CCNB2	0.000598223
PLAC8	0.00059273
HMMR	0.00058301
ASF1B	0.000580876
RPL10	0.000557197
EEF1B2	0.000554291
HINT1	0.000553504
ENSSSCG00000017239	0.000544635
MYO1F	0.000531173
ENSSSCG00000034448	0.000530095
CALM3	0.000528536
PTMA	0.000524047
ENSSSCG00000038507	0.000519016
ENSSSCG00000031088	0.000514451
FABP3	0.0005128
ENSSSCG00000013597	0.000512419
ENSSSCG00000006395	0.000499595
TIGIT	0.000498299
COX1	0.000493738
CENPF	0.000489374
PCNA	0.000482867
PIMREG	0.000474658
ENSSSCG00000036618	0.000466996
COX5B	0.000459581
ASPM	0.000447764
HIST1H2AG	0.000438903
COX3	0.000432401
CDCA8	0.000427314
HIST1H2AB	0.000415513
ENSSSCG00000034913	0.000415455
CTLA4	0.000414578
F2R	0.00040396
RAN	0.000403122
ENSSSCG00000016737	0.000400569
ZBTB32	0.000390473
S100A4	0.000389293
CLSPN	0.000379878
GAPDH	0.00037939
TRAT1	0.000378625
ENSSSCG00000035811	0.000375467
ENSSSCG00000003914	0.00037545
MT3	0.000370927
IFI30	0.000369219
CDT1	0.000360164
CYTB	0.000359516
TYMS	0.000354649
CCR5	0.000349809
LAG3	0.000344089
COX8A	0.000338404
ZNF367	0.000335452
ARHGDIB	0.000335083
DDX39A	0.00033361
RPA3	0.000332225
ENSSSCG00000036350	0.000331969
ENSSSCG00000039107	0.000324298
FLNA	0.000324164
CFL1	0.000320055
TNFRSF1B	0.000313992
ENSSSCG00000004489	0.000307527
MTFR2	0.00030572
DEPDC1B	0.000303324
ACTB	0.000303023
CENPN	0.000296557
ENSSSCG00000036296	0.000294128
VMP1	0.000292946
TOP2A	0.00029277
CDKN3	0.000288413
ND4	0.000286629
DDX5	0.000286422
PLP2	0.000285572
ARHGDIA	0.00028549
ENSSSCG00000015447	0.00027811
CENPS	0.000276168
POMP	0.000273787
DBI	0.000272321
ENSSSCG00000004666	0.000271159
PFN1	0.000267307
ENSSSCG00000032003	0.000267126
ENSSSCG00000020830	0.000266707
ENSSSCG00000002907	0.000265254
ATP5MC3	0.000260255
VIM	0.000259653
DYNLL1	0.000253519
ENSSSCG00000000002	0.000251529
ENSSSCG00000032946	0.000238583
CXCR3	0.000236616
NUF2	0.000229752
CENPE	0.000229161
ENSSSCG00000017032	0.000227557
ENSSSCG00000017213	0.000224971
ARPC2	0.00021798
BATF	0.000217914
PSMA7	0.000217467
NCAPG	0.000211095
ATRX	0.000204927
MCM6	0.000197965
RPL26	0.00019611
ENSSSCG00000026140	0.000195997
EZH2	0.000195608
MCM3	0.00019317
SMC2	0.000192089
RPL39	0.000191311
E2F8	0.000190393
NEK2	0.000186809
RPS23	0.000184726
LEF1	0.000184433
LSP1	0.000178892
ENSSSCG00000016902	0.000176576
ARPC3	0.000173515
ARPC5L	0.000173493
ENSSSCG00000013064	0.000173313
ENSSSCG00000000405	0.000173054
ENSSSCG00000029830	0.000172566
TPM3	0.000170137
ORC1	0.000169859
SGO2	0.000167717
BBS7	0.00016689
ENSSSCG00000039740	0.000165497
CCNB1	0.000164952
ENSSSCG00000034019	0.000164258
ENSSSCG00000008061	0.000159121
ENSSSCG00000013366	0.000156195
RPL5	0.0001552
ENSSSCG00000004970	0.000152377
LAMTOR2	0.000145615
GNB2	0.000145
COX17	0.000143225
ENSSSCG00000004969	0.00014302
CDCA7	0.0001426
CENPU	0.000142538
SLC1A5	0.000142444
SGO1	0.000141053
TBX21	0.000139411
KIF20A	0.000137216
RPS5	0.000136106
ABLIM1	0.000135948
NCAPH	0.000135506
PARVG	0.000135271
ENSSSCG00000008170	0.000133773
LSM2	0.000133382
MCM4	0.000132513
TMEM123	0.000131613
ENSSSCG00000010954	0.00013104
ENSSSCG00000010214	0.000128202
KIF2C	0.000125901
ENSSSCG00000026064	0.000125855
ATP6	0.000125479
ENSSSCG00000027085	0.00012461
SNRPC	0.000123323
ENSSSCG00000014569	0.000121635
SNRPF	0.000121614
SEC11A	0.000117024
CALM1	0.000116896
ENSSSCG00000024974	0.000116874
CDK2AP2	0.000115239
PRR11	0.000115156
ENSSSCG00000032060	0.000114493
EIF4A2	0.000114192
MAP3K1	0.00011343
ENSSSCG00000030300	0.000112498
E2F2	0.000111975
MRPS25	0.000111732
RAD51	0.000110568
MYL6	0.00011023
TCF19	0.000110183
ERH	0.000110057
HSPA4L	0.000106167
TUBA1B	0.000106037
CD52	0.000105577
TXNDC17	0.000104703
TUBB	0.000104081
EVL	0.000103834
YWHAQ	0.000102931
RDX	0.000102851
ENSSSCG00000010203	0.00010044
CDKN2C	9.88014e-05
ENSSSCG00000031117	9.84771e-05
GINS2	9.82705e-05
ENSSSCG00000015337	9.75742e-05
CKS2	9.72449e-05
MCM5	9.59753e-05
RPL3	9.58218e-05
PNISR	9.5715e-05
SRGN	9.53576e-05
KIF4A	9.53223e-05
ND3	9.51628e-05
TCF7	9.46291e-05
SF3B6	9.45218e-05
MELK	9.44541e-05
IL10	9.44324e-05
SRSF5	9.36091e-05
PSMB3	9.20036e-05
RACK1	9.17621e-05
ACTR2	9.15965e-05
CHAF1B	9.042e-05
ENSSSCG00000023792	9.02151e-05
CD69	8.92782e-05
CD48	8.91602e-05
PSMB9	8.89488e-05
TPT1	8.81871e-05
ENSSSCG00000015710	8.75002e-05
ZFP36L2	8.71458e-05
PKMYT1	8.69446e-05
ENSSSCG00000037071	8.47975e-05
ENSSSCG00000038711	8.43533e-05
MCM7	8.41932e-05
PABPC1	8.40088e-05
ENSSSCG00000007743	8.39472e-05
TUBB4B	8.36421e-05
NRM	8.3278e-05
MAD2L1	8.27277e-05
ANGPT2	8.26321e-05
RALY	8.24987e-05
PSMB8	8.23191e-05
PNRC1	8.22113e-05
RCAN3	8.16558e-05
EMB	8.12817e-05
YKT6	8.11758e-05
PFKP	7.9866e-05
RANBP1	7.97399e-05
ENSSSCG00000037775	7.85243e-05
PSMB1	7.79887e-05
ENSSSCG00000035520	7.75895e-05
ENSSSCG00000032166	7.69633e-05
ENSSSCG00000000905	7.626e-05
NDUFB7	7.59432e-05
RPL17.C18orf32	7.58259e-05
GALK1	7.49949e-05
ENSSSCG00000007493	7.41002e-05
MCM2	7.29632e-05
CHD3	7.23267e-05
TECR	6.99559e-05
ENSSSCG00000007088	6.89498e-05
CTSW	6.83979e-05
SCML4	6.8389e-05
CIT	6.82402e-05
PRDX3	6.81557e-05
CDCA3	6.7362e-05
ENSSSCG00000020790	6.73463e-05
LNPEP	6.72762e-05
IFNG	6.68825e-05
COX7B	6.63161e-05
PARPBP	6.62716e-05
PRDM1	6.62378e-05
EIF4B	6.60326e-05
ENSSSCG00000000576	6.59996e-05
ENSSSCG00000036716	6.5981e-05
BARD1	6.55634e-05
COX7A2L	6.52871e-05
ELOC	6.52594e-05
SDF2L1	6.51886e-05
EMP1	6.51469e-05
RORC	6.50172e-05
SFT2D1	6.43848e-05
TMEM258	6.41137e-05
ENSSSCG00000011952	6.36541e-05
ARPC4	6.3431e-05
ATP5F1C	6.24364e-05
ENSSSCG00000028485	6.21059e-05
RPS6	6.15598e-05
EIF3I	6.12932e-05
ENSSSCG00000004518	6.12374e-05
CCR3	6.09809e-05
EEF2	6.07575e-05
MICOS10	6.06401e-05
CD8A	6.06171e-05
RPL22	6.0603e-05
RFC4	6.04753e-05
MBNL1	5.95752e-05
ENSSSCG00000036658	5.84648e-05
SEC61B	5.84537e-05
RNPEP	5.83402e-05
NDUFC1	5.82033e-05
PKM	5.80335e-05
STK26	5.72871e-05
CKS1B	5.70269e-05
SNRPD1	5.6934e-05
NDUFB11	5.6913e-05
CYB5B	5.67513e-05
ENSSSCG00000034129	5.62952e-05
CBX5	5.62762e-05
ATP5MD	5.62528e-05
SNRPE	5.61264e-05
IQGAP2	5.57666e-05
MEAF6	5.55948e-05
IL7R	5.55815e-05
POU2AF1	5.53255e-05
ESCO2	5.49002e-05
PBK	5.45e-05
ENSSSCG00000032556	5.44427e-05
ZDHHC3	5.44383e-05
RPLP0	5.37961e-05
ENSSSCG00000012166	5.3725e-05
NDUFB10	5.3704e-05
STK17B	5.36371e-05
GON7	5.35305e-05
SHCBP1	5.31922e-05
NDUFV2	5.29873e-05
ENSSSCG00000038351	5.29611e-05
ENSSSCG00000035273	5.18927e-05
CAMK4	5.1854e-05
GZMB	5.1784e-05
HDGF	5.16832e-05
ILF2	5.13394e-05
ENSSSCG00000023331	5.06198e-05
CRELD2	4.97767e-05
SELL	4.93746e-05
FOXN3	4.92729e-05
CORO1A	4.9251e-05
MAF	4.89131e-05
MXD3	4.89101e-05
LCP1	4.86217e-05
ORC6	4.84529e-05
LAMTOR5	4.70872e-05
GLIPR2	4.70349e-05
KXD1	4.68018e-05
ENSSSCG00000027565	4.67836e-05
PSMA6	4.66309e-05
RSU1	4.65113e-05
ENSSSCG00000013661	4.64468e-05
ENSSSCG00000003520	4.59604e-05
OSTF1	4.52605e-05
CCR4	4.48012e-05
ICOS	4.46548e-05
ENSSSCG00000030295	4.46303e-05
IVNS1ABP	4.44367e-05
RFESD	4.43977e-05
PPIB	4.43868e-05
TRMT112	4.43263e-05
CD9	4.33973e-05
RASAL3	4.32294e-05
CEP55	4.27366e-05
ENSSSCG00000002550	4.25852e-05
COX6A1	4.24995e-05
ARF6	4.24594e-05
IFNAR1	4.23275e-05
DYNLRB1	4.2276e-05
ENSSSCG00000006081	4.209e-05
ENSSSCG00000003903	4.20385e-05
TNIP3	4.18025e-05
ENSSSCG00000035610	4.17869e-05
ENSSSCG00000003691	4.17721e-05
ENSSSCG00000004145	4.16501e-05
ITGB1	4.14067e-05
NAP1L1	4.13501e-05
TGIF2.RAB5IF	4.10641e-05
ITGA4	4.07943e-05
ENSSSCG00000010320	4.04445e-05
NDUFB9	4.03042e-05
MAD2L2	4.02314e-05
ENSSSCG00000006830	4.01863e-05
CCNG1	4.01719e-05
HLA.DRA	4.00259e-05
ENSSSCG00000033212	3.9742e-05
ENSSSCG00000035869	3.96744e-05
OAZ1	3.9657e-05
ENSSSCG00000028663	3.94729e-05
CD74	3.9377e-05
FAM32A	3.90628e-05
FAAP24	3.85606e-05
ENSSSCG00000013878	3.84948e-05
COX7C	3.80849e-05
ENSSSCG00000039582	3.79661e-05
DUSP14	3.79513e-05
EIF3H	3.78683e-05
ATAD2	3.78446e-05
ENSSSCG00000004782	3.77804e-05
GMNN	3.76965e-05
AP1S1	3.76588e-05
ENSSSCG00000023158	3.76181e-05
SAP18	3.75724e-05
GLRX3	3.7408e-05
ENSSSCG00000040857	3.73862e-05
ITGB2	3.71897e-05
PPM1G	3.70643e-05
RPL36AL	3.59879e-05
NDUFB2	3.56881e-05
RPLP2	3.55188e-05
GNAI2	3.5499e-05
COX5A	3.536e-05
CCNE2	3.52982e-05
SNRPD3	3.52048e-05
RILPL2	3.51518e-05
MRPL57	3.51408e-05
ENSSSCG00000014618	3.50618e-05
CD6	3.50317e-05
PDK1	3.50076e-05
CCT7	3.49873e-05
ENSSSCG00000035728	3.49859e-05
TIMM13	3.48858e-05
ARHGAP15	3.48647e-05
P2RX7	3.48324e-05
LSM8	3.46904e-05
PTPRCAP	3.4658e-05
ENSSSCG00000038364	3.35035e-05
RBM8A	3.3474e-05
UPP1	3.34563e-05
ATP6V1F	3.34254e-05
MCM10	3.32953e-05
SLC25A3	3.32766e-05
PLGRKT	3.32401e-05
ENSSSCG00000014031	3.32238e-05
EFHD2	3.31591e-05
ATP5PB	3.308e-05
ENSSSCG00000033757	3.30632e-05
RPS4X	3.30218e-05
ENSSSCG00000039506	3.2962e-05
ETHE1	3.27975e-05
POLR2E	3.26706e-05
NT5C	3.25911e-05
2021-09-01	3.2514e-05
ENSSSCG00000027573	3.24929e-05
GNG2	3.23207e-05
EIF1	3.23164e-05
ENSSSCG00000023323	3.23082e-05
DDIT4	3.20767e-05
ENSSSCG00000012961	3.14103e-05
ARHGAP11A	3.13899e-05
ALYREF	3.11751e-05
ENSSSCG00000003211	3.11119e-05
RPL7	3.07326e-05
ENSSSCG00000009673	3.06686e-05
PNP	3.06221e-05
AURKB	3.0622e-05
TTK	3.06202e-05
RPL7L1	3.05948e-05
TPM4	3.05146e-05
ENSSSCG00000013889	3.04494e-05
ATXN7L3B	3.0445e-05
RPS21	3.03757e-05
RBM26	3.03642e-05
ARRB2	3.0256e-05
CWC27	3.02431e-05
NUDT21	3.00499e-05
ENSSSCG00000033566	3.00302e-05
CCT8	2.92102e-05
COMT	2.87667e-05
LAMTOR4	2.87181e-05
INPP4B	2.87076e-05
TMEM259	2.867e-05
ENSSSCG00000008433	2.85384e-05
CCR2	2.85116e-05
GPSM3	2.84608e-05
NDUFS8	2.84533e-05
RAF1	2.84269e-05
ATP5IF1	2.842e-05
HP1BP3	2.8408e-05
ENSSSCG00000006418	2.83746e-05
POC1A	2.83552e-05
SLC25A5	2.82951e-05
ATP5MC1	2.82946e-05
GPR34	2.82918e-05
POLR2G	2.82793e-05
ENSSSCG00000014371	2.82557e-05
ATP5F1E	2.81664e-05
FGD3	2.81625e-05
CDC6	2.8143e-05
NAA38	2.814e-05
ENO1	2.81019e-05
MPHOSPH8	2.8081e-05
CGAS	2.80565e-05
CNBP	2.8022e-05
WASF2	2.79715e-05
ROCK1	2.79653e-05
SH3BGRL3	2.79214e-05
IPO11	2.78805e-05
PSMC6	2.77574e-05
IFI6	2.77369e-05
IL2RB	2.74956e-05
ENSSSCG00000000097	2.73718e-05
TEX30	2.63825e-05
LRP10	2.6364e-05
KNTC1	2.62492e-05
PHF5A	2.61736e-05
ENSSSCG00000027826	2.61732e-05
ARPC5	2.61319e-05
ID2	2.60648e-05
CDCA5	2.60161e-05
GUK1	2.59604e-05
RPS20	2.59423e-05
CLTA	2.59271e-05
SLBP	2.5925e-05
ENSSSCG00000034896	2.58609e-05
POLE2	2.58235e-05
RHEBL1	2.57864e-05
HSPD1	2.57734e-05
ENSSSCG00000034527	2.5735e-05
ENSSSCG00000030478	2.57252e-05
ENSSSCG00000037030	2.56808e-05
PSMB7	2.56675e-05
BDP1	2.56336e-05
CD3D	2.5587e-05
UBL3	2.55517e-05
SIVA1	2.55257e-05
WDR1	2.55086e-05
FYB1	2.55064e-05
ASH1L	2.54844e-05
ENSSSCG00000011678	2.54746e-05
ENSSSCG00000033653	2.53308e-05
GPR19	2.52032e-05
HNRNPK	2.52016e-05
TMA7	2.42499e-05
UBTF	2.41599e-05
ENSSSCG00000009851	2.41077e-05
CD3E	2.40241e-05
PSMC5	2.40167e-05
BIRC3	2.39521e-05
IFI44L	2.39e-05
AUP1	2.38835e-05
CENPT	2.38769e-05
SKA2	2.38431e-05
RAD54L	2.38337e-05
ANKRD12	2.37921e-05
UCHL3	2.37817e-05
PRIM2	2.37474e-05
ENSSSCG00000040396	2.37126e-05
ACSL5	2.3627e-05
NFIC	2.36166e-05
ENSSSCG00000023595	2.36033e-05
CLDND1	2.35961e-05
DNMT3A	2.35849e-05
POLR2I	2.358e-05
TMEM11	2.3503e-05
CCT3	2.34687e-05
PSMD14	2.34637e-05
ATAD5	2.34467e-05
PTP4A1	2.34156e-05
ENSSSCG00000016711	2.33976e-05
MFAP1	2.33963e-05
SCAF11	2.33928e-05
ENSSSCG00000029596	2.33572e-05
UBE2S	2.33563e-05
POLR2F	2.33509e-05
CAP1	2.33422e-05
MDH1	2.33286e-05
KRTCAP2	2.33258e-05
CGA	2.33249e-05
SETX	2.3304e-05
HDAC1	2.3252e-05
ENSSSCG00000035686	2.32451e-05
ENSSSCG00000034853	2.32258e-05
UQCRC1	2.32255e-05
RNPS1	2.29737e-05
PPP1R18	2.28514e-05
ELP6	2.15225e-05
NFKBIB	2.1489e-05
IKZF2	2.1467e-05
ATP5PF	2.14304e-05
MTX2	2.14286e-05
CCDC167	2.14133e-05
SRP19	2.13777e-05
PDE8A	2.13445e-05
TSC22D4	2.13262e-05
ENSA	2.13236e-05
AHCY	2.1323e-05
CLEC12A	2.13018e-05
ENSSSCG00000037054	2.12439e-05
ENSSSCG00000025007	2.12239e-05
CCT4	2.12235e-05
HCST	2.12222e-05
ARL4C	2.12125e-05
CIP2A	2.12014e-05
FAXDC2	2.1195e-05
DEPDC1	2.11834e-05
GSR	2.11558e-05
NOC2L	2.11516e-05
CLK1	2.11268e-05
ENSSSCG00000009303	2.10689e-05
JAK1	2.10666e-05
ENSSSCG00000027196	2.10646e-05
CENPM	2.10621e-05
ACADM	2.09953e-05
SSR4	2.09797e-05
ENSSSCG00000011117	2.09551e-05
ENSSSCG00000024973	2.09335e-05
CAPZA1	2.09275e-05
EML4	2.09217e-05
ENSSSCG00000000273	2.09169e-05
CTNNB1	2.09043e-05
CSK	2.08851e-05
CENPK	2.08817e-05
GTF2I	2.08764e-05
EMC3	2.08534e-05
TMPO	2.08392e-05
NDUFB4	2.08226e-05
ITGB7	2.07493e-05
KIF22	2.0722e-05
POLR1D	2.06846e-05
DNMT1	2.05856e-05
ATL3	2.05419e-05
RBBP4	2.04082e-05
ALG5	1.94405e-05
SNF8	1.93471e-05
REL	1.92758e-05
KMT2E	1.92402e-05
MFF	1.9223e-05
KAT7	1.92009e-05
JDP2	1.91685e-05
KNSTRN	1.91662e-05
MND1	1.90862e-05
ENSSSCG00000014343	1.90705e-05
ENSSSCG00000014565	1.90598e-05
MEA1	1.90266e-05
CHCHD5	1.9021e-05
SNTB2	1.90041e-05
CFDP1	1.90021e-05
SELENOP	1.89944e-05
DCAF8	1.89844e-05
ENSSSCG00000016100	1.89446e-05
ENSSSCG00000001456	1.89325e-05
MSN	1.89302e-05
NCAPD2	1.88988e-05
APOBEC3B	1.88905e-05
AHI1	1.88807e-05
EPB41	1.88653e-05
PCBD2	1.88457e-05
ERAP2	1.88356e-05
CST7	1.88252e-05
H3F3A	1.88035e-05
ZNF827	1.88014e-05
ENSSSCG00000033009	1.88014e-05
LXN	1.8798e-05
RBM22	1.87747e-05
HNRNPR	1.87629e-05
2021-09-07	1.87615e-05
NDUFA8	1.87528e-05
CKAP2	1.87381e-05
ZBTB38	1.87354e-05
SCARB1	1.87195e-05
DIAPH3	1.8707e-05
RPS11	1.87021e-05
ISYNA1	1.86916e-05
VPS29	1.86673e-05
PPP1CC	1.86578e-05
LPCAT2	1.86571e-05
ZNF292	1.8648e-05
ENSSSCG00000034709	1.86167e-05
ENSSSCG00000034868	1.8583e-05
LAPTM5	1.8583e-05
PSMA3	1.85775e-05
RTCB	1.85674e-05
TMBIM6	1.85275e-05
MESP1	1.84331e-05
MFSD6	1.84242e-05
ENSSSCG00000014296	1.83816e-05
PDE3B	1.83508e-05
ENSSSCG00000039706	1.82232e-05
STUB1	1.81943e-05
ENSSSCG00000037431	1.79339e-05
RPS13	1.79111e-05
TPI1	1.71997e-05
CENPW	1.69375e-05
NPC2	1.68985e-05
SRSF2	1.68733e-05
LDB1	1.68549e-05
KLHL28	1.68396e-05
ETS1	1.68332e-05
PEX16	1.67834e-05
MIS18A	1.67352e-05
GPI	1.67327e-05
PARP8	1.67264e-05
BCAP31	1.6715e-05
SPAG8	1.6663e-05
FADS3	1.66182e-05
EIF4A1	1.66043e-05
HNRNPU	1.65965e-05
FBXO5	1.65923e-05
STOML2	1.65911e-05
KRAS	1.65794e-05
NR3C1	1.6568e-05
ENSSSCG00000006260	1.6568e-05
RPUSD3	1.65485e-05
PRKAG2	1.65404e-05
ELOVL1	1.65351e-05
MID1IP1	1.65289e-05
CALCOCO2	1.65289e-05
SON	1.65113e-05
DIABLO	1.65073e-05
CNPY2	1.65068e-05
FAF1	1.64955e-05
BRI3BP	1.649e-05
SRA1	1.64847e-05
MGAT4A	1.64818e-05
HBB	1.64766e-05
ARID2	1.64706e-05
HYPK	1.64678e-05
BAZ1B	1.64512e-05
PSMB2	1.64486e-05
ZNF277	1.64348e-05
ENSSSCG00000027907	1.64307e-05
SLC35B1	1.64184e-05
BAG2	1.64127e-05
CD8B	1.64118e-05
EIF2S2	1.64076e-05
PAQR4	1.63988e-05
NDUFS6	1.63821e-05
GDI1	1.6382e-05
GABARAP	1.63743e-05
PDCD1	1.63721e-05
NDUFA13	1.63714e-05
IDH3G	1.63691e-05
AKAP7	1.63551e-05
CDC37	1.6349e-05
ENSSSCG00000026055	1.63473e-05
NDUFA10	1.63372e-05
ENSSSCG00000014267	1.63219e-05
ENSSSCG00000007688	1.63001e-05
PDHB	1.62932e-05
SLU7	1.62916e-05
OASL	1.62899e-05
CLK4	1.62602e-05
RTF1	1.62387e-05
EIF3L	1.62385e-05
LAT	1.62037e-05
NMT1	1.61991e-05
CENPH	1.61504e-05
ENSSSCG00000006061	1.61363e-05
PDLIM7	1.60904e-05
ARHGAP30	1.60878e-05
EMC9	1.59747e-05
GPR171	1.44659e-05
ENSSSCG00000031730	1.44562e-05
JMJD1C	1.44474e-05
COMMD1	1.44119e-05
NUCKS1	1.44011e-05
IPPK	1.43885e-05
SRSF7	1.43752e-05
SLC25A6	1.43547e-05
RPL26L1	1.4353e-05
ARL6IP1	1.43409e-05
RBX1	1.43369e-05
MOSPD3	1.4324e-05
BRD9	1.432e-05
BUD31	1.43195e-05
ENSSSCG00000021560	1.43139e-05
RCAN2	1.42912e-05
RASSF5	1.42857e-05
COX6C	1.42856e-05
ACTR6	1.42808e-05
TMEM60	1.42784e-05
COMMD5	1.42687e-05
FGL2	1.42534e-05
SGCA	1.42518e-05
PSIP1	1.42257e-05
ARAP3	1.42238e-05
MBD2	1.42035e-05
COX4I1	1.41976e-05
DPM3	1.41967e-05
HSP90AB1	1.41942e-05
ENSSSCG00000010517	1.41873e-05
PTGR1	1.4184e-05
ENSSSCG00000034072	1.4182e-05
TGFB1	1.41762e-05
MOV10	1.41761e-05
ENSSSCG00000012517	1.41696e-05
ALG13	1.41677e-05
EIF3K	1.41675e-05
RBM41	1.41653e-05
ENSSSCG00000014909	1.41621e-05
CBL	1.41621e-05
2021-09-06	1.41411e-05
SUMF1	1.41343e-05
MFSD1	1.41343e-05
NEK6	1.41248e-05
TMEM50A	1.4116e-05
AASDHPPT	1.4114e-05
STAT4	1.41134e-05
ACP1	1.41123e-05
EIF4E	1.41011e-05
VEZF1	1.41011e-05
CEND1	1.40928e-05
ITM2A	1.40853e-05
ENSSSCG00000036491	1.40845e-05
TXNIP	1.40836e-05
MRNIP	1.40808e-05
NDUFAF3	1.40799e-05
NOP56	1.40736e-05
CENPO	1.40694e-05
MTHFD2	1.4068e-05
TBCC	1.4068e-05
ENSSSCG00000009241	1.4068e-05
CD81	1.40663e-05
ENSSSCG00000013232	1.40633e-05
SNAPC2	1.40528e-05
ZRANB2	1.40514e-05
ENSSSCG00000021591	1.40441e-05
PAK2	1.40397e-05
PSMB6	1.40355e-05
ENSSSCG00000012811	1.40351e-05
ENSSSCG00000033721	1.4029e-05
PIAS1	1.40187e-05
VCL	1.40174e-05
NAXE	1.4008e-05
ENSSSCG00000033987	1.39917e-05
NDUFA6	1.39762e-05
ENSSSCG00000034871	1.39738e-05
CTSH	1.39721e-05
MGMT	1.39697e-05
SSR1	1.39585e-05
TM2D3	1.39461e-05
R3HDM1	1.39433e-05
SMARCE1	1.39373e-05
ENSSSCG00000040118	1.39329e-05
COMMD4	1.39326e-05
ADCY3	1.3918e-05
SLC39A10	1.3916e-05
CRBN	1.39051e-05
ENSSSCG00000004024	1.38998e-05
CHID1	1.38996e-05
PTBP1	1.38913e-05
TUFT1	1.38889e-05
ENSSSCG00000001455	1.38848e-05
TNRC6B	1.38678e-05
CX3CR1	1.38675e-05
GLIPR1	1.38571e-05
ENSSSCG00000012307	1.3857e-05
HMOX2	1.38451e-05
DCUN1D5	1.38322e-05
ND2	1.38099e-05
HSP90AA1	1.38009e-05
NUP37	1.37931e-05
ARFGEF1	1.373e-05
IMMT	1.37083e-05
CTSD	1.36054e-05
GSTA4	1.34914e-05
GTF2F2	1.22479e-05
SCYL3	1.21803e-05
RNF149	1.21301e-05
ADGRG5	1.21232e-05
UBE2T	1.20919e-05
ENSSSCG00000001097	1.20796e-05
VAMP8	1.20738e-05
HK3	1.20603e-05
TRAPPC6B	1.20258e-05
ENSSSCG00000031083	1.20207e-05
GRB2	1.20192e-05
TPRG1L	1.1997e-05
RFXANK	1.19874e-05
AP1G2	1.19822e-05
ENSSSCG00000001063	1.19763e-05
WDR82	1.1976e-05
NABP1	1.19617e-05
ENSSSCG00000008677	1.19374e-05
DHX15	1.19338e-05
THEMIS	1.19332e-05
IMMP1L	1.19332e-05
KATNA1	1.19293e-05
BID	1.1905e-05
MGA	1.19048e-05
GNG3	1.19048e-05
CKAP2L	1.19048e-05
CISD2	1.19015e-05
COMMD2	1.1901e-05
MRPS18A	1.18992e-05
TTC9C	1.18906e-05
FAM89A	1.18899e-05
ENSSSCG00000038757	1.18885e-05
ERGIC2	1.18854e-05
GOLPH3L	1.18769e-05
ZNHIT3	1.18656e-05
PARN	1.18597e-05
PITRM1	1.18483e-05
RSBN1L	1.18343e-05
EOMES	1.18261e-05
LTB	1.18239e-05
PDCD1LG2	1.18206e-05
MLF2	1.18203e-05
BRCA2	1.18203e-05
SNRPN	1.18115e-05
ARHGAP9	1.18064e-05
LPIN2	1.18064e-05
LARP7	1.18039e-05
CDC7	1.18012e-05
ATP6V0B	1.17951e-05
SDHB	1.17926e-05
TMED4	1.17874e-05
PARK7	1.17786e-05
ATP5F1D	1.17782e-05
DPH5	1.17758e-05
ENSSSCG00000024791	1.17738e-05
DBNL	1.17732e-05
RAB2A	1.17647e-05
GPATCH11	1.17647e-05
VPS4B	1.17635e-05
ENSSSCG00000030002	1.17627e-05
DAD1	1.17603e-05
GNL1	1.17545e-05
ENSSSCG00000027491	1.17537e-05
ENSSSCG00000031912	1.17523e-05
ADH5	1.1752e-05
THRA	1.17509e-05
LASP1	1.17509e-05
ENSSSCG00000017671	1.17483e-05
SNRPA1	1.17428e-05
RSRC2	1.17408e-05
SCAND1	1.1738e-05
ENSSSCG00000011234	1.17364e-05
RALBP1	1.17346e-05
TMEM9	1.17288e-05
MTDH	1.17238e-05
IL27RA	1.17233e-05
PRPSAP1	1.17233e-05
HYLS1	1.17146e-05
FLT3LG	1.17096e-05
ENSSSCG00000000071	1.16967e-05
RER1	1.1696e-05
KPNA2	1.16959e-05
ENSSSCG00000007031	1.16959e-05
PBDC1	1.16861e-05
ENSSSCG00000033744	1.16852e-05
ATF6	1.1685e-05
RFC3	1.1685e-05
FTL	1.16783e-05
SAT2	1.16687e-05
TMEM19	1.16686e-05
FKBP5	1.16632e-05
ISG15	1.16617e-05
RBCK1	1.16578e-05
PPP2R2A	1.1655e-05
RPL27	1.16532e-05
ADAM19	1.16525e-05
ENSSSCG00000012757	1.16467e-05
EME1	1.16414e-05
CCL3L1	1.16414e-05
ENSSSCG00000034743	1.16414e-05
CCND2	1.16383e-05
LAMTOR1	1.16346e-05
FAR2	1.16327e-05
PMM1	1.16279e-05
GRAP2	1.16279e-05
FAS	1.16196e-05
RASGRP2	1.16144e-05
CPSF6	1.16091e-05
GNB1	1.15843e-05
ENSSSCG00000000194	1.15741e-05
RMC1	1.15664e-05
PHGDH	1.15595e-05
ENSSSCG00000016990	1.15589e-05
EXOSC7	1.1558e-05
SDHC	1.15526e-05
ENSSSCG00000017928	1.15174e-05
RCVRN	1.14997e-05
CCNC	1.14943e-05
LRRC59	1.14495e-05
ANGPTL1	1.14416e-05
TUT4	1.14216e-05
TRIB2	1.13133e-05
MYO1G	1.10551e-05
IDH2	1.02416e-05
PQBP1	9.97506e-06
DCLRE1C	9.72053e-06
SMIM7	9.70628e-06
YY1	9.69976e-06
TAGAP	9.69525e-06
STRAP	9.69111e-06
PLAGL1	9.66184e-06
PNPLA2	9.66184e-06
ARCN1	9.64622e-06
OSTM1	9.64313e-06
PPIH	9.6339e-06
MTHFD1	9.63152e-06
FSD1	9.62334e-06
ENSSSCG00000033700	9.5935e-06
ENSSSCG00000038945	9.59322e-06
MRPL22	9.58851e-06
ENSSSCG00000001075	9.5837e-06
ENSSSCG00000013155	9.58339e-06
ENSSSCG00000013568	9.57803e-06
CD63	9.5731e-06
CCNB1IP1	9.57163e-06
ACOT7	9.56938e-06
ACP5	9.56896e-06
CD38	9.55795e-06
BBX	9.55505e-06
GSPT2	9.55259e-06
ENSSSCG00000014280	9.55072e-06
TRAM1	9.54854e-06
GIT2	9.54088e-06
ENSSSCG00000020777	9.53516e-06
TIMELESS	9.53516e-06
CBX8	9.53516e-06
HSPA5	9.52797e-06
BRIX1	9.52381e-06
ERI3	9.52381e-06
ENSSSCG00000033954	9.52381e-06
CWC25	9.52381e-06
UBE2H	9.52381e-06
RHOC	9.5214e-06
RBBP6	9.51864e-06
CSTB	9.51435e-06
RRBP1	9.51312e-06
S1PR5	9.50804e-06
PDAP1	9.50692e-06
ENSSSCG00000034110	9.50491e-06
CYCS	9.5044e-06
ANKRD10	9.50428e-06
C1orf21	9.50152e-06
TXN2	9.50119e-06
ESD	9.50119e-06
ENSSSCG00000033909	9.50119e-06
PSMB4	9.48873e-06
IGSF9	9.48432e-06
RALGPS2	9.47869e-06
ENSSSCG00000031751	9.47617e-06
ENSSSCG00000037143	9.47536e-06
MAP3K5	9.46746e-06
RPF1	9.46746e-06
GLRX2	9.46746e-06
ENSSSCG00000022912	9.46582e-06
SMARCA5	9.4654e-06
BRWD1	9.46468e-06
DTYMK	9.45782e-06
AVPI1	9.45626e-06
SMIM20	9.45626e-06
AAK1	9.45531e-06
UBE2V1	9.44917e-06
MRPL55	9.4451e-06
PSMC2	9.4451e-06
MISP3	9.43788e-06
THUMPD2	9.43485e-06
IRF3	9.43396e-06
UBASH3A	9.43396e-06
JARID2	9.43396e-06
YWHAB	9.43026e-06
NDUFA1	9.42849e-06
G3BP2	9.42318e-06
ENSSSCG00000026960	9.42285e-06
APP	9.42285e-06
POLE	9.42285e-06
DIAPH2	9.42285e-06
BRCA1	9.42285e-06
STK4	9.42139e-06
SARNP	9.41669e-06
RHOG	9.41642e-06
UBE4A	9.41482e-06
SLA.DMA	9.41422e-06
CASC4	9.41176e-06
STK19	9.41176e-06
NOL7	9.40663e-06
TMC8	9.40359e-06
CCDC125	9.40071e-06
MANEA	9.39916e-06
PPIF	9.39573e-06
ESRRA	9.39545e-06
RPS17	9.39249e-06
SPG21	9.39028e-06
ENSSSCG00000036892	9.38967e-06
JAML	9.38747e-06
CHMP1A	9.37995e-06
PCBP2	9.37915e-06
PRDX4	9.37882e-06
CLIC5	9.37866e-06
CRTC3	9.37866e-06
CAPZB	9.37667e-06
MRPS7	9.37341e-06
ENSSSCG00000004583	9.37049e-06
CSRP1	9.3688e-06
DPH2	9.36768e-06
CXCR4	9.36768e-06
TWF2	9.36577e-06
SLC25A39	9.36496e-06
PRKACB	9.35673e-06
DTWD2	9.35461e-06
RPA2	9.35395e-06
ENSSSCG00000003771	9.34614e-06
SENP5	9.34579e-06
CASD1	9.34579e-06
BDH2	9.34579e-06
PLEKHA1	9.34058e-06
ENSSSCG00000038202	9.34042e-06
CNOT10	9.33489e-06
PDCD5	9.33228e-06
ACOT13	9.32912e-06
LCOR	9.32401e-06
ENSSSCG00000017754	9.32401e-06
NCOA1	9.32162e-06
AKAP9	9.32152e-06
DYRK3	9.32025e-06
WDR90	9.31936e-06
HSPA4	9.31936e-06
ENSSSCG00000036083	9.31905e-06
CHD7	9.31606e-06
ENSSSCG00000028397	9.31606e-06
TPD52L1	9.31593e-06
ROMO1	9.31414e-06
GPANK1	9.31315e-06
YWHAH	9.31131e-06
FLOT1	9.30927e-06
ENSSSCG00000031774	9.30238e-06
DENND2D	9.30233e-06
NEDD1	9.29545e-06
CFLAR	9.29459e-06
SKAP1	9.29298e-06
CORO1C	9.29195e-06
NFKBIZ	9.29152e-06
CASTOR1	9.29152e-06
RCC1	9.28074e-06
CUL3	9.28074e-06
PTPN18	9.27971e-06
AGFG2	9.27168e-06
ENSSSCG00000003261	9.26552e-06
CD247	9.26403e-06
NLRC5	9.25959e-06
CXCR6	9.25926e-06
NCK1	9.25926e-06
PNPO	9.25926e-06
PRPF19	9.2591e-06
SSR2	9.25872e-06
TBC1D20	9.24991e-06
NDUFS7	9.24925e-06
SUPT4H1	9.2454e-06
DTX2	9.23788e-06
VPS28	9.23788e-06
TAPBP	9.23788e-06
BDH1	9.23262e-06
ENSSSCG00000028097	9.22905e-06
ATP5PO	9.22475e-06
PKP3	9.2232e-06
TLE5	9.22006e-06
PRPF40A	9.21926e-06
LRCH4	9.21784e-06
CHD9	9.21659e-06
FARSA	9.21659e-06
RGS14	9.21659e-06
ZNF322	9.1954e-06
NBR1	9.1954e-06
LDLRAD4	9.18485e-06
PIK3IP1	9.17431e-06
CRADD	9.17431e-06
ARL6IP5	9.1724e-06
ZDHHC14	9.1638e-06
ASCC3	9.1638e-06
TNKS2	9.15332e-06
RASSF4	9.15332e-06
FAM120A	9.15332e-06
CARHSP1	9.15062e-06
ENSSSCG00000038304	9.13242e-06
CHEK2	9.13088e-06
WHAMM	9.11162e-06
ENSSSCG00000038359	9.10006e-06
TBL1XR1	9.09377e-06
TM2D1	9.08272e-06
RASAL2	8.98876e-06
RAP1GAP2	8.98876e-06
PUF60	7.51282e-06
ENSSSCG00000001505	7.48907e-06
VPS16	7.39827e-06
CHD1	7.36196e-06
CUX1	7.35294e-06
NANS	7.31742e-06
ENSSSCG00000008317	7.30816e-06
LIG1	7.29927e-06
ZGRF1	7.29927e-06
EMG1	7.29927e-06
CTSC	7.29374e-06
CDC42SE1	7.28512e-06
SYT3	7.28155e-06
BCAP29	7.28155e-06
ZNF580	7.27845e-06
SUCLG1	7.27661e-06
RRP8	7.27273e-06
UFM1	7.2717e-06
WBP1	7.26932e-06
MMADHC	7.25847e-06
ENSSSCG00000001341	7.23927e-06
MED23	7.22892e-06
ENSSSCG00000010795	7.21725e-06
IFITM3	7.20904e-06
ENSSSCG00000009772	7.20836e-06
DCP2	7.19424e-06
TLNRD1	7.19424e-06
ESPL1	7.19424e-06
MPP7	7.19424e-06
RSL1D1	7.19424e-06
ENSSSCG00000020686	7.19424e-06
TSEN2	7.18563e-06
TIAM1	7.18563e-06
LANCL1	7.18563e-06
SUV39H1	7.18563e-06
TSFM	7.18563e-06
SEC23B	7.18563e-06
ARPC1B	7.1833e-06
MIEN1	7.18046e-06
DIS3L	7.17703e-06
TPMT	7.17702e-06
ENSSSCG00000036688	7.17132e-06
SHC1	7.17097e-06
CCDC142	7.16846e-06
YEATS4	7.16846e-06
SDHAF2	7.16846e-06
ENSSSCG00000015011	7.16846e-06
ILF3	7.16631e-06
UBXN2A	7.16566e-06
SRRM2	7.16279e-06
RPIA	7.1599e-06
NRAS	7.15772e-06
ENSSSCG00000014075	7.15731e-06
BAZ2A	7.1541e-06
NDUFS4	7.15169e-06
ARID1A	7.15137e-06
ENSSSCG00000036247	7.15137e-06
ENSSSCG00000036826	7.15137e-06
WASHC4	7.15137e-06
ENSSSCG00000005658	7.14859e-06
MRPL21	7.14788e-06
MCCC2	7.14495e-06
DDX6	7.14286e-06
PRKCE	7.14286e-06
TOR1AIP2	7.14286e-06
A4GALT	7.13982e-06
DNAJC19	7.13953e-06
COG6	7.1373e-06
NXT2	7.13436e-06
TMEM9B	7.13264e-06
RGS19	7.13234e-06
NSMCE1	7.13191e-06
DYNLT3	7.13157e-06
GATA3	7.12717e-06
ANAPC15	7.12624e-06
PBRM1	7.12613e-06
MRPS33	7.12591e-06
QSER1	7.12589e-06
LAPTM4A	7.12589e-06
FAM122B	7.12589e-06
MORF4L1	7.12589e-06
ENSSSCG00000002449	7.12589e-06
C12orf45	7.12526e-06
EXOSC10	7.11744e-06
ENSSSCG00000023126	7.11477e-06
GUSB	7.11247e-06
SH3KBP1	7.11225e-06
PBXIP1	7.11176e-06
YIF1B	7.109e-06
UQCR10	7.109e-06
STK39	7.109e-06
TIMM8B	7.109e-06
PLXNC1	7.109e-06
ND5	7.109e-06
MEIOB	7.109e-06
DDOST	7.10826e-06
ENSSSCG00000005518	7.10798e-06
HERC4	7.10726e-06
RARS	7.10077e-06
TRAIP	7.10059e-06
ENSSSCG00000012014	7.10059e-06
NAA60	7.10059e-06
PGRMC1	7.10059e-06
CD86	7.09885e-06
ENSSSCG00000007355	7.09238e-06
RCBTB1	7.0922e-06
DHCR7	7.091e-06
ENSSSCG00000015434	7.08985e-06
KEAP1	7.08383e-06
MRPL17	7.08383e-06
BRCC3	7.08383e-06
DDX52	7.08383e-06
FAM3C	7.08383e-06
MAK16	7.08383e-06
PRELID1	7.08383e-06
MAD1L1	7.08383e-06
LEPROTL1	7.08125e-06
STAT5B	7.07882e-06
PNN	7.07577e-06
FNIP2	7.07547e-06
ACTR1A	7.07547e-06
SULT1A3	7.07269e-06
CREM	7.07242e-06
LAMTOR3	7.06883e-06
CLIC4	7.06714e-06
RFX2	7.06714e-06
CCM2	7.06714e-06
GABARAPL1	7.06714e-06
PMPCB	7.06687e-06
SHOC2	7.06326e-06
ADAT2	7.06238e-06
DDX54	7.06159e-06
ENSSSCG00000016475	7.06122e-06
IL18R1	7.05931e-06
FAM50A	7.05903e-06
CDC26	7.05882e-06
PEF1	7.05882e-06
SAR1A	7.05882e-06
CDK6	7.05882e-06
SVIL	7.05882e-06
EIF4E2	7.05733e-06
FH	7.05606e-06
PPP2R1B	7.05466e-06
CCDC117	7.05371e-06
AP2S1	7.05189e-06
ENSSSCG00000013721	7.05179e-06
SERPINI1	7.05053e-06
ENSSSCG00000005135	7.05053e-06
VRK1	7.05053e-06
SLK	7.04791e-06
TAF1D	7.04504e-06
CPD	7.04243e-06
LIPA	7.04225e-06
STK25	7.04225e-06
CEP350	7.03971e-06
PXK	7.03951e-06
RPS26	7.03755e-06
FLNB	7.03717e-06
TSN	7.03696e-06
CCDC127	7.03408e-06
TCP11L1	7.034e-06
PARP4	7.034e-06
ENSSSCG00000035048	7.034e-06
DAZAP2	7.034e-06
FCER1G	7.034e-06
RASSF3	7.034e-06
ENSSSCG00000006665	7.03355e-06
TSPO	7.03221e-06
SRP14	7.02887e-06
ENSSSCG00000006628	7.02861e-06
SPOCK2	7.02854e-06
PRR5L	7.02851e-06
ARID4B	7.02677e-06
ZC3H7A	7.02616e-06
ENSSSCG00000005656	7.02576e-06
INPP5B	7.02576e-06
TESC	7.02576e-06
ZNF655	7.02576e-06
COPS6	7.02576e-06
SLC35C2	7.02576e-06
NDUFS5	7.02542e-06
WAS	7.02516e-06
ENSSSCG00000011676	7.02303e-06
S100A13	7.02302e-06
TBC1D5	7.02194e-06
OTUB1	7.02e-06
ENSSSCG00000033500	7.01792e-06
ENSSSCG00000014997	7.01767e-06
UTRN	7.01754e-06
UFL1	7.01754e-06
MSL2	7.01754e-06
ZNF146	7.01754e-06
NEIL3	7.01754e-06
ENSSSCG00000005982	7.01754e-06
FMR1	7.01208e-06
CNOT6L	7.01091e-06
VGLL4	7.00935e-06
TMED5	7.00747e-06
SAE1	7.00557e-06
TUBA4A	7.00332e-06
CFAP36	7.00117e-06
KCNK5	7.00117e-06
NUB1	6.99759e-06
DCTN6	6.99594e-06
PHB	6.99583e-06
DDX17	6.9934e-06
CEBPZ	6.99301e-06
NUFIP2	6.99301e-06
GCC1	6.99301e-06
IFI35	6.99114e-06
MAP10	6.9905e-06
COG3	6.98799e-06
AAAS	6.98504e-06
ENSSSCG00000009128	6.98504e-06
TMX3	6.98487e-06
FAM214B	6.98487e-06
L3MBTL2	6.98487e-06
TMEM189	6.98487e-06
PSME1	6.98226e-06
RPS18	6.98085e-06
EDRF1	6.98002e-06
RAB27A	6.97935e-06
HSPA8	6.97832e-06
GYG1	6.97727e-06
SAT1	6.97674e-06
OGFOD3	6.97674e-06
DHX9	6.96957e-06
ZC3H15	6.96923e-06
CORO1B	6.96864e-06
ENSSSCG00000031773	6.96379e-06
EXOC6	6.96366e-06
SGCB	6.96231e-06
MIF	6.96163e-06
ENSSSCG00000033019	6.96061e-06
FDXR	6.96058e-06
CBFB	6.96056e-06
CELF1	6.96056e-06
UNG	6.96056e-06
ABCB7	6.96056e-06
MLH3	6.96056e-06
PSMC1	6.96056e-06
ENSSSCG00000039581	6.96056e-06
EXOSC9	6.96056e-06
ARRDC4	6.96056e-06
ENSSSCG00000016758	6.95851e-06
AIMP1	6.95552e-06
DDX24	6.95516e-06
MAP3K4	6.95249e-06
RPP21	6.95249e-06
HSF1	6.95022e-06
NTAN1	6.94978e-06
CNDP2	6.94444e-06
BRD3	6.94444e-06
PSENEN	6.94444e-06
SMC3	6.94444e-06
ENSSSCG00000028035	6.94444e-06
ENPP4	6.94444e-06
DNAJA1	6.94444e-06
FAM129A	6.94215e-06
DDT	6.93642e-06
TONSL	6.93642e-06
ENSSSCG00000000107	6.93642e-06
TNRC6C	6.93642e-06
NRBF2	6.93369e-06
CIB1	6.92613e-06
HYOU1	6.92132e-06
ENSSSCG00000038825	6.92042e-06
ENSSSCG00000027840	6.9151e-06
GNAI3	6.91244e-06
PHIP	6.91244e-06
RNF111	6.91244e-06
ASPA	6.90993e-06
ENSSSCG00000025940	6.90937e-06
CLP1	6.90449e-06
SLX4	6.90449e-06
ATM	6.89655e-06
POLE4	6.8888e-06
NAA25	6.88863e-06
ENSSSCG00000006156	6.88863e-06
FKBP8	6.87816e-06
KCMF1	6.87292e-06
DHX58	6.87262e-06
TFRC	6.8725e-06
KTN1	6.86499e-06
TBC1D1	6.86499e-06
NEDD8	6.86499e-06
XYLT2	6.86499e-06
HPF1	6.86499e-06
GMDS	6.86499e-06
REEP4	6.85714e-06
CXorf56	6.85714e-06
JMJD6	6.84782e-06
C19orf66	6.84151e-06
PDIA3	6.84091e-06
TBK1	6.83992e-06
BSCL2	6.80272e-06
MSC	6.80272e-06
STAT6	6.80272e-06
ENSSSCG00000015664	6.79934e-06
PKIG	6.79406e-06
AOAH	6.781e-06
CCNDBP1	6.77966e-06
C11orf58	6.73299e-06
BCCIP	6.72692e-06
ARF4	6.70158e-06
RRP1B	6.65461e-06
RAB5C	6.36456e-06
ACTR10	5.03544e-06
SH2D1A	5.01294e-06
ENSSSCG00000040801	4.99274e-06
MINDY2	4.98753e-06
ENSSSCG00000039407	4.98133e-06
CAPN1	4.94438e-06
RABAC1	4.92005e-06
SNU13	4.91656e-06
SMAD2	4.91098e-06
LGMN	4.90473e-06
PRDM10	4.90196e-06
YME1L1	4.90196e-06
NRBP1	4.89187e-06
SMARCA4	4.88998e-06
ZNRD1	4.88998e-06
CCRL2	4.884e-06
RUVBL2	4.884e-06
ENSSSCG00000000483	4.884e-06
TADA1	4.87211e-06
SAMHD1	4.87126e-06
PIGT	4.86715e-06
FMNL3	4.86618e-06
LPCAT3	4.85437e-06
IPO5	4.85437e-06
PRKCQ	4.85437e-06
ENSSSCG00000036595	4.85144e-06
UBA5	4.84848e-06
MTFMT	4.84262e-06
C19orf54	4.84262e-06
PKN1	4.84262e-06
NACC1	4.84262e-06
ATF6B	4.84126e-06
RTN4	4.83843e-06
MTA2	4.83676e-06
ZDHHC4	4.83676e-06
LARP4	4.83676e-06
RNF114	4.83676e-06
STXBP3	4.83295e-06
TPM1	4.83095e-06
TNPO2	4.83092e-06
PDLIM1	4.83068e-06
ENSSSCG00000015040	4.82654e-06
ISCU	4.82469e-06
MRPL11	4.82155e-06
PRXL2B	4.82028e-06
PAK1IP1	4.81928e-06
HBEGF	4.81348e-06
PITHD1	4.81148e-06
ZDHHC5	4.80858e-06
MCL1	4.80839e-06
ENSSSCG00000005508	4.80769e-06
ENSSSCG00000039915	4.80769e-06
ENSSSCG00000040060	4.80769e-06
FASN	4.80626e-06
RFX5	4.80192e-06
NUP98	4.80159e-06
ENSSSCG00000039331	4.79966e-06
ENSSSCG00000002790	4.79951e-06
ENSSSCG00000004349	4.79768e-06
TIMP1	4.79616e-06
C21orf91	4.79616e-06
GPR55	4.79616e-06
POLR3F	4.79616e-06
TMUB1	4.79616e-06
PPP2R1A	4.79565e-06
SEC24B	4.79317e-06
ORC4	4.79042e-06
ENSSSCG00000033068	4.79042e-06
ZNF518A	4.79042e-06
PNPLA8	4.79042e-06
ATP8	4.79042e-06
BCAS4	4.78948e-06
IBTK	4.78882e-06
STX10	4.78494e-06
FBXO30	4.78469e-06
DENND1C	4.78469e-06
GPN3	4.78469e-06
EPS15	4.78469e-06
TCF3	4.78469e-06
ACBD6	4.78469e-06
NCK2	4.78469e-06
KRCC1	4.78469e-06
ADSL	4.78469e-06
MED10	4.78469e-06
TMCO6	4.78108e-06
ENSSSCG00000007826	4.77898e-06
PLEKHM2	4.77897e-06
CNOT6	4.77897e-06
PRRC2C	4.77897e-06
UPF3B	4.77897e-06
DNAJC10	4.77575e-06
ZBTB48	4.77327e-06
BET1L	4.77327e-06
ACOXL	4.77327e-06
INKA2	4.77327e-06
ARMC10	4.77327e-06
PAIP1	4.77327e-06
CCDC47	4.77327e-06
IL10RA	4.77185e-06
DUS4L	4.76758e-06
FASLG	4.76758e-06
ENSSSCG00000012746	4.76758e-06
DDX39B	4.76758e-06
ABI1	4.76635e-06
ENSSSCG00000034866	4.76564e-06
RAB1A	4.76517e-06
TMEM33	4.76495e-06
HSCB	4.76478e-06
CEP72	4.7619e-06
ENSSSCG00000005643	4.7619e-06
TAOK2	4.7619e-06
ITPRIPL1	4.7619e-06
SHISA4	4.76138e-06
DERL1	4.75985e-06
CNOT1	4.75907e-06
ARGLU1	4.75907e-06
GDI2	4.75819e-06
CHMP5	4.75625e-06
CYB561D2	4.75624e-06
CIC	4.75624e-06
VAMP5	4.75624e-06
ENSSSCG00000032465	4.75624e-06
BBS2	4.75624e-06
TMEM59	4.75624e-06
KBTBD3	4.75624e-06
GLMP	4.755e-06
CEP192	4.75301e-06
ENSSSCG00000029857	4.75062e-06
CARNMT1	4.75059e-06
TMF1	4.75059e-06
TBC1D23	4.75059e-06
VPS26C	4.75059e-06
AP1G1	4.75059e-06
XPO7	4.75059e-06
USP42	4.75059e-06
NDUFS2	4.75059e-06
EMC4	4.75059e-06
KRR1	4.75059e-06
TPP2	4.75059e-06
UNK	4.75059e-06
ESYT2	4.75059e-06
REEP5	4.74865e-06
ENSSSCG00000033819	4.74778e-06
ADO	4.74513e-06
DYRK1A	4.74511e-06
FOXK1	4.74496e-06
POLR1C	4.74496e-06
PIK3R1	4.74496e-06
RABEP1	4.74496e-06
ENSSSCG00000008183	4.74241e-06
PLIN3	4.73958e-06
MYO19	4.7395e-06
RDH13	4.73934e-06
ANKHD1	4.73934e-06
SGMS1	4.73934e-06
ZFAND1	4.73934e-06
RAD51AP1	4.73934e-06
ENSSSCG00000016464	4.73934e-06
ENSSSCG00000023691	4.73741e-06
TWISTNB	4.73653e-06
ENSSSCG00000003849	4.73531e-06
ENSSSCG00000027974	4.73522e-06
CD3G	4.73473e-06
PPP2R5D	4.73453e-06
CNP	4.73379e-06
TTC3	4.73373e-06
TMEM71	4.73373e-06
SYNE3	4.73373e-06
ACTR5	4.73373e-06
LSS	4.73373e-06
GNPDA1	4.73373e-06
SLAMF7	4.73373e-06
ENSSSCG00000025305	4.73141e-06
NUBP1	4.73106e-06
SUN2	4.73106e-06
RASSF7	4.73093e-06
TMEM98	4.72824e-06
RELA	4.72813e-06
ENSSSCG00000014132	4.72813e-06
ENSSSCG00000033787	4.72813e-06
RGS10	4.72813e-06
ZBTB16	4.72813e-06
ENSSSCG00000005841	4.72813e-06
HERPUD2	4.72813e-06
ENSSSCG00000007978	4.72542e-06
MRPL3	4.72321e-06
CDC27	4.72279e-06
ENSSSCG00000032382	4.72266e-06
CASP3	4.72258e-06
ARHGEF3	4.72255e-06
NUP210	4.72255e-06
ENSSSCG00000002877	4.72255e-06
ENSSSCG00000027905	4.72255e-06
PIP5K1A	4.72255e-06
ST8SIA1	4.72255e-06
TMEM107	4.72255e-06
SAMD3	4.72036e-06
IDH3B	4.72004e-06
NCBP2	4.71866e-06
MANF	4.71722e-06
ZNHIT6	4.71715e-06
THOC7	4.71698e-06
ENSSSCG00000030122	4.71698e-06
RBMX2	4.71698e-06
TOP3A	4.71698e-06
UBE2K	4.71698e-06
TP53INP1	4.71698e-06
ATXN7L2	4.71698e-06
CHD8	4.71698e-06
ENSSSCG00000001696	4.71215e-06
CDK4	4.71215e-06
RIPK1	4.71195e-06
SLC35E3	4.71153e-06
SLC3A2	4.71143e-06
CDCA2	4.71143e-06
PTPN11	4.71143e-06
ITPRID2	4.71143e-06
SCLT1	4.71143e-06
EHBP1	4.71143e-06
MECP2	4.71143e-06
GPX3	4.71143e-06
DEGS1	4.71143e-06
MFSD14B	4.71143e-06
ENSSSCG00000026043	4.71143e-06
FKBP9	4.71143e-06
USF1	4.70865e-06
INPP5K	4.70864e-06
KIF14	4.70588e-06
GRWD1	4.70588e-06
ATP13A2	4.70588e-06
TENT2	4.70588e-06
RASA1	4.70588e-06
MNDA	4.70588e-06
MOSPD1	4.70588e-06
VTI1B	4.70588e-06
TUBG1	4.70588e-06
RAD51D	4.70588e-06
ITM2C	4.70586e-06
CDR2L	4.70325e-06
CDKN2AIPNL	4.70067e-06
TENT5C	4.70041e-06
NCBP1	4.70035e-06
NIT2	4.70035e-06
KAZALD1	4.70035e-06
NOL8	4.70035e-06
MRPS35	4.70035e-06
SART3	4.70035e-06
SRXN1	4.70035e-06
BZW1	4.69779e-06
ALKBH7	4.69715e-06
FECH	4.6961e-06
GALK2	4.69484e-06
MUL1	4.69484e-06
ENSSSCG00000013380	4.69484e-06
2021-03-02	4.69484e-06
FIP1L1	4.69484e-06
DDIT3	4.69484e-06
TTPAL	4.69484e-06
FAM210B	4.69484e-06
UBAC1	4.69484e-06
ENSSSCG00000022176	4.69336e-06
ENSSSCG00000039056	4.69212e-06
GCC2	4.69208e-06
CTSB	4.69111e-06
ENSSSCG00000009967	4.69098e-06
EMC6	4.68965e-06
SNX14	4.68933e-06
EXOSC5	4.68933e-06
NBL1	4.68933e-06
KDM1A	4.68933e-06
TIMM29	4.68933e-06
URB2	4.68933e-06
MRPS36	4.68933e-06
IRF2	4.68933e-06
G6PD	4.68933e-06
IKBKG	4.68933e-06
RPS19BP1	4.68925e-06
ENSSSCG00000038754	4.68744e-06
DDX58	4.68729e-06
XRCC6	4.68705e-06
FLI1	4.68678e-06
MYL4	4.68657e-06
NCAPG2	4.68623e-06
REX1BD	4.6839e-06
AURKAIP1	4.68385e-06
SYTL3	4.68384e-06
PYCARD	4.68384e-06
DR1	4.68384e-06
EXOC3	4.68384e-06
CAB39L	4.68384e-06
AFG3L2	4.68384e-06
ERLEC1	4.68384e-06
SMNDC1	4.68245e-06
PRKCB	4.68027e-06
HSD17B4	4.67842e-06
HERC1	4.67836e-06
RMDN3	4.67836e-06
FAM210A	4.67836e-06
GTF2H1	4.67836e-06
ENSSSCG00000009770	4.67836e-06
CYP51A1	4.67836e-06
RAD21	4.67836e-06
PARVB	4.67836e-06
MKRN1	4.67836e-06
CNOT3	4.67836e-06
ENSSSCG00000025028	4.67836e-06
ERGIC1	4.67836e-06
MED7	4.67836e-06
STARD3	4.67836e-06
FLOT2	4.67836e-06
MRPS2	4.67836e-06
MRPL13	4.67679e-06
PPP4R3B	4.6759e-06
PSAP	4.67587e-06
GPBP1	4.67582e-06
MAP2K2	4.67382e-06
CEP162	4.6729e-06
FKTN	4.6729e-06
CIAO2B	4.6729e-06
WDR55	4.6729e-06
HPS4	4.6729e-06
CDKN2AIP	4.6729e-06
LIAS	4.6729e-06
NTHL1	4.6729e-06
HBM	4.6729e-06
SLC25A14	4.6729e-06
C22orf23	4.6729e-06
PAFAH1B1	4.6729e-06
NUDCD2	4.6729e-06
TMEM70	4.67063e-06
PYM1	4.66821e-06
CDCA7L	4.6675e-06
EXOC8	4.66744e-06
D2HGDH	4.66744e-06
CEPT1	4.66744e-06
NCLN	4.66744e-06
ENSSSCG00000017108	4.66744e-06
PIGU	4.66744e-06
TRIM27	4.66744e-06
TIPIN	4.6648e-06
CDKAL1	4.66252e-06
HNRNPH2	4.66223e-06
DNAJC8	4.662e-06
DPY19L4	4.662e-06
UBE2V2	4.662e-06
SASH3	4.662e-06
BIN2	4.662e-06
ENSSSCG00000004945	4.65734e-06
SEC11C	4.65675e-06
CGGBP1	4.65668e-06
NUBP2	4.65658e-06
SLAIN1	4.65658e-06
ENSSSCG00000027046	4.65432e-06
ENSSSCG00000035256	4.65386e-06
LENG8	4.65192e-06
PLK3	4.65116e-06
ENSSSCG00000001414	4.65116e-06
MRPL41	4.65116e-06
GSTO1	4.65116e-06
GTF2E2	4.65116e-06
ENSSSCG00000024290	4.65116e-06
ENSSSCG00000027348	4.6496e-06
ENSSSCG00000033814	4.64864e-06
ZNRF1	4.64576e-06
ZFR2	4.64576e-06
PALM	4.64576e-06
SNX2	4.64576e-06
PTK2B	4.64576e-06
RBM48	4.64576e-06
GLE1	4.64037e-06
EXOSC1	4.64037e-06
RUSC1	4.64037e-06
LRRFIP2	4.64037e-06
PIN1	4.64037e-06
RAB11FIP2	4.64037e-06
TMBIM1	4.64037e-06
RC3H1	4.64037e-06
CLOCK	4.64037e-06
UBE2W	4.64037e-06
CHTOP	4.64037e-06
ENSSSCG00000000199	4.64037e-06
PSMA4	4.64013e-06
SKA3	4.63819e-06
ENSSSCG00000001934	4.6377e-06
EIF3D	4.63694e-06
SURF4	4.63686e-06
SPG7	4.63499e-06
ENSSSCG00000009239	4.63499e-06
ENSSSCG00000031227	4.63499e-06
TMEM263	4.63499e-06
NAGPA	4.63235e-06
TBCA	4.63031e-06
SESN1	4.62963e-06
C5orf24	4.62963e-06
RNF10	4.62963e-06
PAFAH1B2	4.62963e-06
POLR3C	4.62963e-06
BAG1	4.62963e-06
TIMP2	4.62963e-06
ENSSSCG00000017766	4.62963e-06
MRPS6	4.62587e-06
SHISA5	4.62439e-06
SAP30L	4.62428e-06
ATP13A1	4.62428e-06
SLC25A24	4.62428e-06
AGO3	4.62426e-06
ENSSSCG00000013052	4.62272e-06
WDR34	4.62216e-06
SNAPC5	4.62161e-06
ERBIN	4.61896e-06
C2orf76	4.61894e-06
EIF2A	4.61894e-06
THOC1	4.61894e-06
ARL2	4.61894e-06
SH2B3	4.61894e-06
THOC2	4.61894e-06
MYDGF	4.61542e-06
CLIC6	4.61391e-06
APAF1	4.61361e-06
TRAPPC3	4.61191e-06
ZNF330	4.61126e-06
ENSSSCG00000040556	4.61103e-06
PEX13	4.60829e-06
ENSSSCG00000002003	4.60829e-06
ZNF350	4.60829e-06
ENSSSCG00000031871	4.60829e-06
ENSSSCG00000032650	4.60829e-06
CYBA	4.60829e-06
UBQLN1	4.60675e-06
DGCR8	4.60583e-06
FUNDC1	4.60386e-06
MOBKL3	4.60302e-06
FANCD2	4.60299e-06
FBXO6	4.60299e-06
TAF15	4.60299e-06
MDM4	4.60047e-06
AP1M1	4.60013e-06
RNF113A	4.59771e-06
UBXN11	4.5977e-06
LSM6	4.5977e-06
OXR1	4.5977e-06
DEDD	4.5977e-06
LCN2	4.5977e-06
AIMP2	4.5977e-06
CPPED1	4.5977e-06
EXOC2	4.5977e-06
NEMP1	4.5977e-06
ENSSSCG00000002004	4.59526e-06
CHIC2	4.5935e-06
DHX57	4.59316e-06
ENSSSCG00000031172	4.59248e-06
PIGK	4.59242e-06
PAPOLG	4.59242e-06
SLC50A1	4.59242e-06
ERP44	4.59242e-06
CHCHD1	4.59242e-06
ENSSSCG00000038963	4.59242e-06
UBR5	4.58716e-06
ENSSSCG00000000040	4.58716e-06
G3BP1	4.58716e-06
ENSSSCG00000010931	4.58716e-06
UBE2Q1	4.58595e-06
TCOF1	4.5819e-06
DNAJC1	4.5819e-06
PCMTD1	4.57971e-06
RAD9A	4.57666e-06
EIF2AK1	4.57666e-06
NRF1	4.57666e-06
FUS	4.57219e-06
[truncated: 12,388 more rows]

## Sheet: 3v4_Impurity
Supplementary File 11. Random forest pair-wise analyses of CD4+ αβ T-cell clusters. For each model represented below the porcine scRNA-seq cluster IDs compared are shown along with the parameters used and resulting OOB prediction error. Variable importance was assigned by measuring node impurity (Impurity) and using permutations (Permutation). Features that reduced error in predictive accuracy ar…
Gene	Impurity
COX1	11.3882
ENSSSCG00000037142	9.89783
TMSB10	9.09575
ENSSSCG00000003930	8.36391
S100A6	7.67747
ENSSSCG00000034617	7.45503
ENSSSCG00000003042	6.91989
S100A4	6.84728
S100A11	6.70661
ACTG1	6.42569
COX2	6.19433
COX3	5.9882
GPX1	5.7667
RPS3A	5.71189
RPL35	5.5424
LGALS1	5.49684
TRAT1	5.1575
RPS16	4.8806
RPS27	4.78327
LTB	4.55005
RPL23	4.39674
ENSSSCG00000014855	4.3549
CD74	4.27102
ENSSSCG00000035768	4.20746
ACTB	4.11508
ENSSSCG00000036618	4.11486
CCR7	4.02239
ENSSSCG00000039544	4.01776
BTG1	3.80742
MYL6	3.67858
C15orf48	3.67045
RPL6	3.48071
RPL34	3.41301
RPS15	3.33255
S100A10	3.22019
ENSSSCG00000040273	3.07359
HLA.DRA	3.06723
ENSSSCG00000004489	3.04262
RPL5	3.01185
ENSSSCG00000035080	2.91709
HSD11B1L	2.81615
RPS11	2.78102
ENSSSCG00000031088	2.71158
RPS6	2.66474
ARPC3	2.64894
DUT	2.63493
LSP1	2.60274
IFI6	2.50896
RPL39	2.48395
ENSSSCG00000035811	2.44233
CD52	2.43174
RPL17.C18orf32	2.41461
RPS13	2.35998
SLA.DQB1	2.3369
RPL9	2.31346
IKZF3	2.29855
ENSSSCG00000011272	2.28994
RPL11	2.21886
RPL3	2.21743
CYTB	2.20325
ENSSSCG00000004970	2.17252
RPL37	2.17196
SH3BGRL3	2.06999
ENSSSCG00000025928	2.06389
DDX5	2.05609
ENSSSCG00000039071	2.01856
RACK1	1.98148
RPS18	1.95645
PABPC1	1.95476
RPS23	1.92838
LAPTM5	1.85384
RPL7A	1.82838
ENSSSCG00000014565	1.82104
ENSSSCG00000017239	1.76855
ENSSSCG00000027573	1.75713
ENSSSCG00000005453	1.7559
RPS14	1.74649
ENSSSCG00000004945	1.74019
RPL10	1.73703
ENSSSCG00000000576	1.72234
ISG20	1.71448
ANXA2	1.71115
BST2	1.69159
PFN1	1.64471
ENSSSCG00000001455	1.64032
RPLP0	1.63303
PLAC8	1.63257
ATP6	1.62945
RDX	1.61788
COX6C	1.60926
ENSSSCG00000033697	1.60362
CCL5	1.60012
ENSSSCG00000018063	1.59885
RPL22	1.58958
RPS12	1.58278
ENSSSCG00000001456	1.58107
ENSSSCG00000024974	1.57827
ND4	1.56776
ENSSSCG00000006081	1.56102
TCF7	1.52087
EEF1B2	1.50924
ARHGDIB	1.48871
ISG15	1.4799
NKG7	1.46785
COX5B	1.46742
ENSSSCG00000038507	1.46198
ENSSSCG00000034448	1.44057
PLAAT3	1.41053
RPS5	1.40553
RAC2	1.39721
ENSSSCG00000013064	1.39682
TPT1	1.38439
SRGN	1.37337
RPL7	1.36918
RPS9	1.35461
BATF	1.33964
GZMK	1.33635
H3F3A	1.3362
ENSSSCG00000001341	1.26218
RPS4X	1.24499
ARF6	1.24306
ENSSSCG00000013597	1.23965
LCP1	1.23746
ENSSSCG00000017509	1.23209
CD99	1.20832
IFITM3	1.20635
ENSSSCG00000012119	1.19004
ENSSSCG00000033019	1.18795
ENSSSCG00000009303	1.1879
ENSSSCG00000001229	1.17101
IKZF2	1.15882
F2R	1.1566
PTMA	1.13235
CFL1	1.12343
PSMB8	1.11529
ENSSSCG00000036296	1.11191
KXD1	1.10168
ENSSSCG00000037030	1.09383
ARPC2	1.09189
ENSSSCG00000033721	1.08412
EVL	1.08218
ENSSSCG00000016903	1.08103
ENSSSCG00000039460	1.07263
ENSSSCG00000007743	1.06719
RPSA	1.0539
EIF1	1.05311
TNFRSF1B	1.03288
IL7R	1.03238
TPM3	1.01574
PDK1	1.01106
GMFG	1.00927
UCP2	1.00899
ARPC4	0.999959
B2M	0.999207
RPS26	0.996742
EIF4A2	0.991989
ENSSSCG00000033734	0.988458
SCML4	0.988154
ENSSSCG00000029830	0.987893
ENSSSCG00000011952	0.968
H3F3B	0.964116
ENSSSCG00000039046	0.963873
SELL	0.957838
CTLA4	0.95479
ENSSSCG00000013889	0.944938
ENSSSCG00000015040	0.934515
RPLP2	0.928904
MYO1F	0.928544
CALM1	0.919132
COX8A	0.91771
CAPZA1	0.91499
ENSSSCG00000028485	0.913972
RPS17	0.913863
CORO1A	0.911995
SAT1	0.910852
PNISR	0.909706
CTSC	0.907128
CAPG	0.898468
ENSSSCG00000007188	0.897938
FTL	0.889692
SSR2	0.881776
ENSSSCG00000020830	0.868726
ENSSSCG00000006395	0.866355
S100A13	0.860872
RPS20	0.857742
ENSSSCG00000008433	0.854603
RPL26	0.851543
UBB	0.851187
MIF	0.84861
GNB2	0.847079
TMEM123	0.837606
ENSSSCG00000006380	0.836628
BCAS4	0.835136
ENSSSCG00000036716	0.834269
LEF1	0.819436
COX7B	0.816962
CAP1	0.816778
VMP1	0.815987
ENSSSCG00000008170	0.814502
COX7A2L	0.812232
ENSSSCG00000039740	0.811542
SH2D1A	0.811084
ENSSSCG00000014569	0.810188
ITGB1	0.801374
FLNA	0.792791
BTF3	0.790117
HINT1	0.784927
GZMB	0.784687
EIF3K	0.783367
ENSSSCG00000008061	0.780418
ARPC5	0.779264
ENSSSCG00000003691	0.772054
ENSSSCG00000033500	0.77097
HSPA8	0.768942
ITM2C	0.768843
OAZ1	0.7688
GLIPR1	0.768375
ENSSSCG00000016737	0.768061
H2AFV	0.76742
SLC25A6	0.767083
HMGB2	0.767007
COX4I1	0.761737
ARPC5L	0.761556
ENSSSCG00000029596	0.761482
RPS10.NUDT3	0.75507
EZR	0.754093
ENSSSCG00000024973	0.750169
ND2	0.749598
RPL27	0.736284
GAPDH	0.735871
ENSSSCG00000037885	0.733973
SRSF5	0.733318
LAG3	0.73009
CD40LG	0.728321
UBC	0.722479
LCK	0.721042
SEC61B	0.718419
RHOC	0.715021
ENSSSCG00000000071	0.713555
IFIT1	0.713016
ENSSSCG00000039582	0.711186
ENSSSCG00000014540	0.706364
ND1	0.704111
RPS21	0.70357
ENSSSCG00000000657	0.701979
NDUFS5	0.70035
ID2	0.697859
PTPRC	0.696673
ENSSSCG00000035520	0.693997
LIMD2	0.691011
NOP53	0.690351
ND5	0.687821
ENSSSCG00000036350	0.683254
ENSSSCG00000034019	0.682708
CNBP	0.6826
2021-09-01	0.681868
ENSSSCG00000032556	0.678889
PTP4A2	0.678021
GABARAP	0.672251
ENSSSCG00000023158	0.671061
HSPE1	0.669921
ATP5PO	0.669022
EEF2	0.666185
ZFP36L2	0.665037
DDX17	0.664954
SUMO2	0.659118
ATRX	0.655899
ENSSSCG00000023331	0.654545
ATP5F1E	0.653396
ENSSSCG00000031912	0.652603
UBE2D3	0.652037
ENSSSCG00000011234	0.651174
CD2	0.651022
OSTF1	0.650944
ARPC1B	0.649389
RTRAF	0.649343
LY96	0.6461
ENSSSCG00000033733	0.645435
TMA7	0.645312
ENSSSCG00000025499	0.645025
PNRC1	0.642768
VIM	0.642654
COX7C	0.639729
COX7A2	0.639245
RPL10A	0.638633
ENSSSCG00000004145	0.637141
RAP1B	0.634098
ID3	0.633723
GNG2	0.632238
ENSSSCG00000003903	0.630129
RPL36AL	0.629879
ENSSSCG00000032003	0.627162
MAP3K1	0.6264
SSR4	0.625899
TSPO	0.625472
ARL6IP1	0.620539
SOD1	0.618354
CTSW	0.617686
ENSSSCG00000013366	0.616722
CD63	0.616703
NME2	0.612525
HNRNPK	0.611968
TAF1D	0.608402
ECHS1	0.608294
ENSSSCG00000016226	0.607297
ZBTB32	0.605971
UBXN1	0.605494
NPM1	0.604848
HNRNPH3	0.604302
RBBP4	0.601925
ITGB2	0.600823
ENSSSCG00000036114	0.600793
HSH2D	0.596902
ENSSSCG00000015710	0.596666
ENSSSCG00000021591	0.596175
ENSSSCG00000016990	0.594707
ATP5PF	0.593589
RCAN3	0.591779
ENSSSCG00000039581	0.589666
NAP1L1	0.589366
ENSSSCG00000024776	0.588982
ATP6V1G1	0.588841
RAN	0.587713
POLR2F	0.587196
CAMK4	0.587154
ENSSSCG00000012397	0.585226
ITGB7	0.585199
EMP3	0.58415
CGA	0.583717
CD37	0.583434
SERBP1	0.58322
COTL1	0.582302
EEF1D	0.578765
ENSSSCG00000031897	0.578427
NDFIP2	0.577295
ENSSSCG00000022176	0.577227
NOP10	0.576862
SAMHD1	0.575116
ENSSSCG00000030300	0.57507
HMGN2	0.571569
BIN2	0.565675
PRDX2	0.564927
SNRPE	0.564426
UNC119	0.56357
ATP5PB	0.562192
NSD3	0.562098
TRAF3IP3	0.561731
ENSSSCG00000003520	0.560836
YWHAB	0.559985
ENSSSCG00000038351	0.559793
UBE2L6	0.558948
TPM4	0.558867
IL6R	0.558269
ENSSSCG00000033909	0.555727
LAT	0.555059
ENSSSCG00000015337	0.554669
CAPZB	0.552726
ITM2B	0.550516
SON	0.549925
HNRNPM	0.548321
YWHAZ	0.548299
ABLIM1	0.548066
PTPRCAP	0.547677
FYB1	0.547032
FKBP11	0.546991
ATP5MC3	0.54658
TRIM22	0.546397
COX6A1	0.544788
PARK7	0.544276
CD3E	0.544053
2021-09-07	0.542929
VAMP8	0.542699
WDR1	0.542379
ENSSSCG00000000273	0.539428
HYPK	0.538096
ENSSSCG00000037775	0.537839
MICOS10	0.536013
NTAN1	0.53594
ENSSSCG00000009327	0.535676
VASP	0.534357
HSP90AA1	0.534044
ENSSSCG00000002004	0.53178
HNRNPDL	0.530523
ENSSSCG00000001398	0.530032
CNN2	0.529372
RHOA	0.529238
SRSF2	0.529014
RAP1A	0.526775
ENSSSCG00000002907	0.525543
ENSSSCG00000013661	0.525462
MAX	0.523687
ENSSSCG00000010203	0.522108
ANKRD12	0.521948
HSP90AB1	0.519992
ENSSSCG00000034190	0.519527
EML4	0.519418
HNRNPU	0.518758
TRMT112	0.517414
GRB2	0.516266
ATP5IF1	0.515979
ATP5MD	0.515297
ENO1	0.513834
GABARAPL2	0.513243
MT3	0.512132
MIEN1	0.51197
TMEM258	0.511936
MBNL1	0.51164
SKAP1	0.510257
CD8A	0.509132
RAB11A	0.507956
NDUFS8	0.507795
PPP1R18	0.507253
ARL6IP5	0.506357
SUSD3	0.506277
ENSSSCG00000000905	0.504955
CD5	0.504627
ENSSSCG00000033744	0.502503
PSME1	0.501761
KLF2	0.500227
MRPS25	0.498945
GZMM	0.498397
SF3B6	0.49704
ENSSSCG00000013992	0.494822
DBI	0.49423
RASA3	0.494129
TRAM1	0.493002
PNRC2	0.490534
ETS1	0.490526
ENSSSCG00000014343	0.489031
ENSSSCG00000001075	0.488196
ARHGDIA	0.488115
S1PR1	0.487101
CD247	0.487027
PPP1CC	0.485556
ENSSSCG00000024263	0.485394
EMB	0.482322
ENSSSCG00000013052	0.481934
CIRBP	0.480084
CSK	0.479434
BZW1	0.47909
RBX1	0.476673
ENSSSCG00000027826	0.475719
ATP5F1A	0.47554
ND3	0.475246
CSTB	0.475144
ENSSSCG00000038711	0.474928
POLR2E	0.474797
AQP3	0.474541
PPP2CA	0.474169
ENSSSCG00000040118	0.473736
ENSSSCG00000035728	0.472088
CD3G	0.470584
ARGLU1	0.470448
STK4	0.469927
DAPL1	0.469022
JAK1	0.468244
PPIB	0.468064
NDUFA13	0.467964
ENSSSCG00000012961	0.467479
ENSSSCG00000032166	0.46485
ENSSSCG00000001097	0.462044
KHDRBS1	0.460911
ENSSSCG00000033653	0.460865
FLI1	0.460125
ACTR2	0.458613
ANAPC16	0.456673
ENSSSCG00000002550	0.455975
STMN1	0.455807
ENSSSCG00000006418	0.455806
PSIP1	0.45531
SF3B1	0.453393
TWF2	0.452693
TLE5	0.452563
CD69	0.451744
NDUFB4	0.451616
ENSSSCG00000000405	0.451527
C12orf10	0.450514
CST7	0.449152
HIGD2A	0.449065
ENSSSCG00000020790	0.448601
WAS	0.446919
ENSSSCG00000035256	0.446659
EIF3E	0.445396
GPX4	0.445054
RALBP1	0.444938
OCIAD1	0.444427
IL6ST	0.443809
ENSSSCG00000020777	0.442821
CUTA	0.442635
TRAPPC5	0.441719
EIF4G2	0.441489
BIN1	0.440713
ENSSSCG00000017213	0.438391
ENSSSCG00000009772	0.43787
VPS28	0.437786
NOL7	0.437634
RGCC	0.435727
HMGN3	0.435491
ENSSSCG00000022912	0.435077
VPS29	0.434731
ENSSSCG00000028479	0.43371
ITGA4	0.43341
ENSSSCG00000017555	0.433322
SSB	0.432858
HSPB1	0.431105
NUDT21	0.431102
SPCS3	0.430023
SMAD2	0.429792
MGAT4A	0.429719
COX5A	0.42949
HCST	0.429412
RGS19	0.429212
ENSSSCG00000007688	0.428685
ENSSSCG00000007355	0.428025
CALM3	0.427941
ATP6V0C	0.427831
EIF3H	0.427521
TMEM59	0.424444
RABAC1	0.424353
ENSSSCG00000003348	0.423678
PSMB4	0.423283
PSMB6	0.423025
SNX6	0.4225
PKM	0.422485
NDUFB7	0.422419
ENSSSCG00000018061	0.422101
FUNDC1	0.42152
ENSSSCG00000037602	0.42146
MRPL57	0.420483
ISCU	0.419799
BRK1	0.419679
ENSSSCG00000034709	0.419432
COX17	0.418268
PSMB9	0.417843
SERPINF1	0.417684
PARVG	0.417596
SNX3	0.417508
SLC9A3R1	0.416658
RBM8A	0.416616
STX11	0.416342
PLP2	0.416244
TUBA1B	0.415817
RHEB	0.415612
TGIF2.RAB5IF	0.415437
ENSSSCG00000035224	0.414785
ARID4B	0.414683
CD47	0.411585
ENSSSCG00000027196	0.410948
ATP5F1C	0.41084
MRPL17	0.410255
TPI1	0.410013
SLC25A3	0.409805
PPP1CA	0.409319
ENSSSCG00000012178	0.409223
EIF3I	0.408045
SUMO1	0.406257
CTSH	0.405883
GUK1	0.405822
DDX6	0.405478
PRRC2C	0.40494
DNAJA1	0.40448
CCT2	0.403957
MRPL12	0.403329
ENSSSCG00000013315	0.402594
HMCES	0.401339
ENSSSCG00000027085	0.400218
SRI	0.399375
SELENOT	0.399329
NDUFB9	0.399032
MALT1	0.398161
RBM39	0.398075
IFI44L	0.397954
SLC25A5	0.397088
FAXDC2	0.396989
PIK3R1	0.395937
SNF8	0.395362
REEP5	0.39522
MAP2K2	0.394783
ENSSSCG00000027840	0.394069
TMEM50A	0.393411
HNRNPC	0.39309
GDI2	0.392797
ENSSSCG00000001396	0.392297
ESD	0.392167
ERH	0.391752
SNU13	0.391338
CD38	0.390553
CFLAR	0.390337
VPS4B	0.388541
SPG21	0.387839
REX1BD	0.386253
TUBB	0.386214
DYNLL1	0.38618
ANAPC13	0.38576
ENSSSCG00000014267	0.38571
SAP18	0.385614
RBM42	0.385571
ENSSSCG00000037595	0.384987
LAMTOR2	0.384923
SRRM1	0.384548
THYN1	0.384508
ENSSSCG00000011117	0.384306
TMBIM6	0.384203
RTF1	0.383954
TXNIP	0.383332
TSC22D3	0.383186
POU2F2	0.383165
CLTA	0.382977
ENSSSCG00000010954	0.382571
ENSSSCG00000007978	0.382528
SPCS1	0.382013
CD3D	0.381928
HSPA5	0.381747
EPSTI1	0.381552
GLRX3	0.380501
TMEM160	0.380497
SDF4	0.380392
EIF4A1	0.380375
ATP5MC1	0.380001
MAGT1	0.379525
SEC61G	0.378428
NDUFC1	0.378395
ARHGAP30	0.377755
ELF1	0.376827
ENSSSCG00000005768	0.376358
CHRAC1	0.37633
DDT	0.375934
ENSSSCG00000003261	0.375933
ACOT13	0.375653
NDUFB10	0.375033
CPPED1	0.374568
TXNDC17	0.374322
ENSSSCG00000001038	0.373442
PSMA6	0.373138
ENSSSCG00000037081	0.372361
AIMP1	0.371815
NDFIP1	0.37159
GPSM3	0.371528
UQCRC1	0.371273
2021-09-06	0.371127
FADS3	0.370357
ENSSSCG00000003914	0.37023
ENSSSCG00000040857	0.36967
PSMA3	0.369652
TBCA	0.369183
CDK2AP2	0.36905
SRSF10	0.368749
SAMD9	0.368484
LEPROTL1	0.368317
PCBP2	0.367999
ENSSSCG00000006919	0.366995
UBL3	0.366746
SLC44A2	0.366465
TRA2B	0.36562
ZNHIT1	0.36547
NANS	0.365235
ENSSSCG00000033212	0.365037
ENSSSCG00000013596	0.364994
CCND3	0.364834
GLIPR2	0.363911
SUPT4H1	0.363212
RGS10	0.36278
SFT2D1	0.36213
ERAP2	0.361377
SUCLG1	0.361302
GBP2	0.361164
UBE2V1	0.360959
ENSSSCG00000001779	0.36088
PRR7	0.360695
ENSSSCG00000004446	0.360658
CCNG1	0.360161
CYCS	0.359709
PNN	0.359524
CTSD	0.359457
SYNCRIP	0.359412
ENSSSCG00000024313	0.359228
FNBP4	0.359017
CAPZA2	0.358621
CD81	0.358525
SLA2	0.358175
NME1	0.35817
PSAP	0.357916
CHMP4B	0.357183
KRTCAP2	0.357178
ENSSSCG00000013721	0.357013
CYTIP	0.356309
PSMA7	0.35608
PIGC	0.355979
EIF3L	0.355685
EIF3D	0.355546
PGK1	0.355411
LAMTOR4	0.355
CTSS	0.354733
SMARCE1	0.354622
ELAVL1	0.354593
ENSSSCG00000027565	0.354122
ATP6V1E1	0.353771
CHD3	0.35358
HSPH1	0.352905
ZFP36L1	0.35275
ENSSSCG00000028663	0.352262
RANBP1	0.352201
RPN1	0.352147
RHOG	0.351737
FUS	0.351399
PRDX6	0.351244
CFDP1	0.350973
FAM49B	0.350605
ENSSSCG00000014371	0.35053
CTSA	0.350491
NEDD8	0.350486
HCLS1	0.350435
ENSSSCG00000036491	0.350348
MSN	0.350222
C11orf58	0.350058
ATP5MC2	0.349551
SARAF	0.349522
ENSSSCG00000010517	0.347928
STRAP	0.34765
ENSSSCG00000027746	0.347614
ENSSSCG00000039706	0.347335
NOP56	0.347314
MFAP1	0.347197
CACYBP	0.346652
ENSSSCG00000014850	0.346335
ILF2	0.346175
ERP44	0.345745
CXCR3	0.345723
GPR174	0.345616
HBB	0.345354
SKP1	0.344879
STK17B	0.344751
ADD3	0.344276
ENSSSCG00000034314	0.343898
ENSSSCG00000036988	0.343349
STK38	0.343218
MTDH	0.343133
ENSSSCG00000027491	0.343124
RSRC2	0.342909
RRAGC	0.342483
PRMT1	0.342167
PSMC3	0.342158
ELOC	0.341794
NDUFA1	0.341496
ABI1	0.340917
DYNLT3	0.340882
LSM14A	0.3407
ENSSSCG00000010734	0.338576
BIRC3	0.33852
SSH1	0.338113
CREBZF	0.338029
RAB2A	0.337883
ZAP70	0.33754
UQCR10	0.337029
NDUFB11	0.336354
ESF1	0.336293
ENSSSCG00000031152	0.336084
POLR2G	0.335647
RAC1	0.33531
POLR1D	0.333516
GPBP1	0.333515
EIF4B	0.333468
ZRANB2	0.333416
CDKN1B	0.332459
MGST3	0.33245
SARNP	0.332339
TMEM134	0.33221
VDAC3	0.332014
TMCO1	0.331446
YWHAH	0.33118
ENSSSCG00000007088	0.330853
ENSSSCG00000009145	0.330582
NDUFS4	0.330488
DAZAP2	0.330386
CEBPB	0.330217
HNRNPR	0.329948
PDCD5	0.329661
SRP14	0.328731
ENSA	0.328149
ENSSSCG00000016711	0.327705
ZNF292	0.327075
ENSSSCG00000006061	0.326765
ENSSSCG00000005656	0.326693
G3BP1	0.326541
CARD19	0.32645
SEC11C	0.326218
SNRPF	0.326181
C6orf62	0.326117
ME2	0.32593
PSMA4	0.324746
CCT4	0.324682
ENSSSCG00000016263	0.324561
SH3KBP1	0.324541
ENSSSCG00000027348	0.32452
ENSSSCG00000023323	0.324452
EWSR1	0.324172
RNASEH2C	0.324117
RASGRP2	0.324031
DDX39B	0.323863
TALDO1	0.32366
CD53	0.323635
MCL1	0.32363
ATP6V1F	0.323101
ALG13	0.322934
TM2D1	0.322756
SASH3	0.322588
RPS19BP1	0.322511
PTBP3	0.321985
ENSSSCG00000013878	0.321979
TNFAIP3	0.320153
LBR	0.320144
CD4	0.318863
EIF5B	0.318303
CCT7	0.317976
ATP5ME	0.317973
NCK1	0.31791
TMED9	0.317807
PRELID1	0.317719
TAX1BP1	0.317659
NCL	0.317517
NUCKS1	0.317379
R3HDM1	0.316553
ENSSSCG00000028397	0.315841
ENSSSCG00000034868	0.315758
EIF6	0.31559
SRSF4	0.315397
CALCOCO2	0.315235
CETN3	0.315027
ENSSSCG00000038444	0.314961
RNF149	0.314957
MED30	0.314737
THOC2	0.314519
ZC3HAV1	0.31433
EIF3A	0.314243
RNPS1	0.314183
LRCH4	0.314071
FERMT3	0.313872
ARHGAP15	0.313849
GATA3	0.313397
ARHGAP4	0.313352
RNF181	0.313314
CANX	0.312981
RBMX	0.312978
RTF2	0.312947
ENSSSCG00000004666	0.312922
CDKN2AIPNL	0.312672
ENSSSCG00000038364	0.312473
BCLAF1	0.312282
MAP1LC3B	0.31222
HM13	0.311648
PAIP2	0.31102
ENSSSCG00000011121	0.310577
ENSSSCG00000009625	0.310547
LAMTOR5	0.310458
KARS	0.310168
CSNK1A1	0.309567
PTBP1	0.30826
SIT1	0.30811
SSR3	0.308043
POLE4	0.308028
ENSSSCG00000036096	0.307957
SELENOF	0.307883
SMARCA2	0.30775
STAT1	0.307615
ZC3H15	0.307309
SPTBN1	0.306902
LSM2	0.306775
RSU1	0.305927
ENSSSCG00000012166	0.305775
PSMC4	0.305534
SMCHD1	0.305134
TNFAIP8	0.304968
SH3BGRL	0.304899
ENSSSCG00000007098	0.304741
IRF7	0.304738
UBE2B	0.303878
TNRC6B	0.303768
AHI1	0.303469
RAB5A	0.303258
ENSSSCG00000030295	0.303192
SELENOH	0.302839
UBE3A	0.302724
UQCC3	0.302368
ARF4	0.302204
ENSSSCG00000000663	0.301535
RCSD1	0.301343
EPB41	0.301264
RSL24D1	0.301087
IVNS1ABP	0.300613
MX1	0.300516
PSMB7	0.300419
PRKCB	0.299955
MEAF6	0.298956
C12orf75	0.298807
CSDE1	0.298626
RILPL2	0.298461
PPP4R3B	0.298342
ENSSSCG00000012916	0.298029
SLC25A24	0.298019
PHB2	0.297946
FCGRT	0.297468
SYF2	0.297059
CALR	0.297039
STXBP2	0.296469
PPP1R11	0.296379
ENSSSCG00000039658	0.296283
EIF4H	0.296193
FLT3LG	0.295448
HNRNPLL	0.295402
GYPC	0.295316
ENSSSCG00000013720	0.295155
ENSSSCG00000014075	0.294707
FAM129A	0.294582
PRKCSH	0.294458
ENSSSCG00000003253	0.29442
ENSSSCG00000027675	0.293605
WDR61	0.293273
RHOH	0.292794
DHX9	0.292679
TMED5	0.292595
SF3B5	0.292576
ENSSSCG00000033272	0.29256
FAM32A	0.292203
ENSSSCG00000034527	0.2922
PTPN18	0.292122
ENSSSCG00000037869	0.292118
ND6	0.291977
DDX46	0.291887
ENSSSCG00000016758	0.291659
TMEM263	0.291647
CWF19L2	0.291559
ENSSSCG00000027907	0.291511
TLN1	0.291158
ERBIN	0.290955
PDLIM7	0.290889
FGD3	0.290862
SMC3	0.290756
ANXA1	0.290608
CCT3	0.290591
NUB1	0.290548
BUD23	0.290204
FAM78A	0.29015
PSMB1	0.290138
STX8	0.290043
STARD4	0.28963
NCBP2	0.289599
MRPL55	0.289472
ENSSSCG00000023792	0.289261
MRPL20	0.289249
RRP15	0.289242
IL10RA	0.289005
TCEA1	0.288815
ANXA5	0.288435
ANGEL2	0.287988
TMED4	0.287664
CRLF3	0.287311
CD6	0.287277
CCPG1	0.28698
GYG1	0.286838
ENSSSCG00000016262	0.286553
ENSSSCG00000004963	0.286248
FAM162A	0.285974
TPR	0.28582
FAM83A	0.285624
RSAD2	0.285616
ENSSSCG00000035869	0.285473
NUBP2	0.285082
ENSSSCG00000010320	0.285023
TSPAN5	0.284748
HERC6	0.28474
ARFGAP3	0.284349
PRPF4B	0.28425
RASGRP1	0.28384
JAML	0.283801
RNF4	0.28356
TCF25	0.283335
RALY	0.283184
PDCD10	0.282761
POLR2K	0.282711
SLC35B1	0.282561
ENSSSCG00000003849	0.282379
NDUFB8	0.282257
BCAP31	0.281915
SP110	0.281885
PLEKHB2	0.281577
KMT2E	0.281377
DPY30	0.280953
RAB27A	0.28081
SIVA1	0.280762
TVP23C	0.280454
HDAC2	0.279979
ENSSSCG00000001696	0.279254
SPOCK2	0.279187
ENSSSCG00000039731	0.27916
MAT2B	0.279131
GLUD1	0.278975
ENSSSCG00000016100	0.278843
HNRNPH1	0.278716
GTF2B	0.278419
APBB1IP	0.278359
RASSF5	0.278322
DBNL	0.278126
ENSSSCG00000032073	0.2779
PFDN4	0.277879
H2AFZ	0.277871
GNAI2	0.277843
UBXN11	0.277784
FAM89A	0.277397
FLII	0.277345
ENSSSCG00000005518	0.277316
SYNGR2	0.277264
CD44	0.276634
RFC2	0.276399
UTRN	0.27634
SH3GLB1	0.276276
EIF1B	0.276122
ENSSSCG00000017928	0.27569
NONO	0.275678
SCAF11	0.275582
ELMO1	0.275486
PRDX3	0.275418
HSPD1	0.275327
CCT5	0.275108
PLEKHA1	0.274748
PHB	0.274721
SRPK1	0.273664
SRSF6	0.273483
ENSSSCG00000011764	0.27314
ENSSSCG00000002259	0.272977
PSMB2	0.272966
IQGAP1	0.272956
HP1BP3	0.272878
LRP10	0.272809
FLOT1	0.272729
UFD1	0.272403
RNF19A	0.271973
IFI35	0.271591
GSN	0.271452
ENSSSCG00000038359	0.271451
ROMO1	0.271198
AHSA1	0.271115
ENSSSCG00000014031	0.271064
H2AFY	0.270883
PSMC6	0.270719
ENSSSCG00000021560	0.270422
CCDC69	0.270183
RPIA	0.269974
TUT7	0.2697
PFDN1	0.269115
BOLA3	0.268877
RIDA	0.268641
SEC11A	0.268184
TMEM156	0.267959
CDC37	0.267543
BAZ1A	0.2672
HMOX2	0.267167
ZNF207	0.267086
SSR1	0.266939
PEF1	0.266924
ILK	0.266851
AKAP9	0.266686
ZNF277	0.266626
PVRIG	0.266423
MPHOSPH8	0.266352
SHKBP1	0.26635
ADI1	0.266144
BCCIP	0.265326
SQSTM1	0.264814
CDC123	0.264681
ENSSSCG00000031773	0.264614
ENSSSCG00000014296	0.264402
RBM4	0.264375
ENSSSCG00000006363	0.263737
RPN2	0.263666
SHISA5	0.263499
UBASH3A	0.263405
ERP29	0.263216
CHD1	0.263095
POMP	0.263046
LAPTM4A	0.262766
YTHDC1	0.262394
SNRPN	0.262033
ENSSSCG00000016451	0.26179
STXBP3	0.261316
GPR183	0.261127
SMC4	0.260741
CRIPT	0.260692
RASA1	0.260691
RSBN1L	0.260512
COMT	0.260506
BBX	0.260492
MANF	0.260378
RAF1	0.260283
RPL7L1	0.26007
TSC22D4	0.259806
ENSSSCG00000039249	0.259799
ANKRD10	0.259645
BLOC1S1	0.259265
MMADHC	0.259235
ARRB2	0.259153
CYBA	0.258954
ENSSSCG00000001414	0.258878
ZFP36	0.258789
TYMS	0.258711
CDK4	0.258159
ENSSSCG00000025593	0.258138
KTN1	0.258118
IL18R1	0.257985
CELF1	0.257935
EDF1	0.257823
PBDC1	0.257418
U2SURP	0.257367
CAPNS1	0.25731
SYAP1	0.25722
RFC1	0.25686
ATP6V1D	0.256525
ENSSSCG00000040248	0.25651
CTCF	0.255883
ENSSSCG00000025007	0.255863
ACAP1	0.2557
SRRM2	0.255671
CNOT7	0.255639
COMMD6	0.255605
WASF2	0.255543
ENSSSCG00000037143	0.255485
HSPA4	0.254886
MRPL34	0.254731
EPN1	0.254662
COA3	0.254561
NMI	0.254368
PRKACB	0.25425
PAK2	0.254235
THOC7	0.254159
C18orf32	0.254142
ROCK1	0.254013
ENSSSCG00000033068	0.253446
SNRNP25	0.253389
DCAF8	0.253305
DNAJC8	0.252957
TUT4	0.252751
TBC1D20	0.252672
PIK3IP1	0.252556
LASP1	0.25253
MRPS33	0.252509
PRPS1	0.252119
RBMS1	0.251983
PDCD4	0.251971
VAV1	0.251965
BAG1	0.251168
PDIA6	0.250953
ENSSSCG00000016475	0.250889
TGFB1	0.250221
SIGIRR	0.250004
ENSSSCG00000031580	0.249999
DAXX	0.249869
CMPK2	0.249565
ENSSSCG00000000097	0.24954
PARP14	0.249299
SNRPD1	0.249123
IRF1	0.249103
ENSSSCG00000000697	0.24872
UCHL3	0.248707
ENSSSCG00000001063	0.248626
EIF2S2	0.248617
TAGAP	0.248371
LNPEP	0.248237
DDX60	0.248198
SFPQ	0.247868
MISP3	0.247794
CPSF6	0.247793
NDUFS3	0.247665
TMEM173	0.247648
MVP	0.247568
MYO5A	0.247493
EIF2A	0.247422
RASSF3	0.247348
SPAG8	0.247249
RAB7A	0.247181
NAA10	0.24717
RAP2B	0.247146
BNIP3	0.247088
YTHDF2	0.246974
ENSSSCG00000011676	0.246756
CGAS	0.246733
AP2S1	0.246561
LAX1	0.246513
MRPL38	0.246398
UBE2D2	0.246169
ENSSSCG00000038989	0.246138
CCR4	0.245613
SBNO1	0.245506
LGALS3BP	0.245427
METAP2	0.245288
PTPN6	0.245054
ADSS	0.244931
NAA20	0.244508
PRPF40A	0.24428
ERGIC2	0.24399
MORF4L1	0.243916
CIR1	0.243723
SMDT1	0.24368
GOLM1	0.243609
ENSSSCG00000035538	0.2435
PI4K2B	0.243402
ARID1A	0.243079
MAT2A	0.242762
RNPEP	0.24243
SNW1	0.242205
PTPRE	0.24196
CCAR1	0.241925
ENSSSCG00000033757	0.241384
RPL26L1	0.240956
GTF2E2	0.240944
ENSSSCG00000002505	0.240877
TMEM50B	0.240852
CTNNB1	0.240553
UQCRQ	0.240483
COPS6	0.240427
MFF	0.240358
LXN	0.240238
BCAP29	0.240037
THOC1	0.239631
ENSSSCG00000040801	0.239373
DOCK11	0.239115
SRP19	0.238898
TWISTNB	0.238814
GPR171	0.238625
ENSSSCG00000017906	0.237943
ZNRF1	0.237787
SNRPD3	0.237786
MYL9	0.23778
CYBC1	0.237639
NARS	0.237524
DAD1	0.237381
CHMP2A	0.237298
MYO1G	0.237177
ENSSSCG00000017754	0.236961
ENSSSCG00000040396	0.236859
PPIG	0.236806
YWHAQ	0.236802
SUCLG2	0.236748
CYFIP2	0.236637
ACSF2	0.236374
CUEDC2	0.236196
FAM210B	0.236058
PAFAH1B1	0.235989
ENSSSCG00000017626	0.235856
ENSSSCG00000010158	0.235707
ATF4	0.235572
NDUFS7	0.23553
ENSSSCG00000013436	0.235479
SCAND1	0.235368
RASSF1	0.235237
CDC42SE2	0.235079
CGGBP1	0.234994
CNOT6L	0.234992
SPTAN1	0.234977
YPEL3	0.234829
ARID5B	0.234744
CCNI	0.234678
PSTPIP1	0.234598
ENSSSCG00000026140	0.234108
LBH	0.234003
TMEM189	0.233881
OGA	0.233775
MID1IP1	0.233663
ENSSSCG00000000365	0.233136
TBL1XR1	0.232983
TAB2	0.232846
PDCD6	0.232756
PRDX4	0.232325
CDC42SE1	0.23231
USP8	0.232275
FXR1	0.232253
EIF4EBP1	0.23219
EIF1AX	0.232181
RNF7	0.232077
ENSSSCG00000037071	0.231968
CNDP2	0.231709
NIPBL	0.231706
SDCBP	0.231582
PIK3CD	0.231334
URI1	0.231014
IDH3G	0.231007
SERPINI1	0.230951
MRPL41	0.230914
CITED2	0.230702
NUDC	0.230689
TIMM13	0.230655
PIN1	0.230574
PRKAR1A	0.230379
SF3B2	0.230339
RCHY1	0.230293
ARHGAP25	0.229701
ENSSSCG00000015814	0.229668
BRD9	0.229392
TPM2	0.229334
SEC62	0.229262
SERP1	0.2292
IRF2BP2	0.229104
DMAC2	0.229078
PCF11	0.228819
RBM38	0.228768
ENSSSCG00000006156	0.228723
NPL	0.228721
PSMF1	0.228539
MPC2	0.228538
NCALD	0.22852
SNRK	0.22849
GTF2F2	0.228444
CNP	0.22841
WARS	0.228301
CCT8	0.228191
MTPN	0.227978
FAM171B	0.227905
DENND2D	0.227826
CHCHD7	0.22776
NCOA7	0.227752
YY1	0.227617
STOML2	0.227332
ENSSSCG00000004414	0.227216
ENSSSCG00000012811	0.227051
UPRT	0.226962
PPM1G	0.226808
GADD45GIP1	0.226613
UQCC2	0.226386
YPEL5	0.226351
INPP5D	0.226223
CD1D	0.226176
ENSSSCG00000009851	0.226068
ENSSSCG00000013391	0.225965
MNDA	0.225845
HIF1A	0.225767
NFKBIA	0.225767
CNPY2	0.225751
ENSSSCG00000003211	0.225733
LARP7	0.225697
C12orf45	0.225613
TIMM17B	0.22559
PSMC5	0.225565
PIK3R5	0.22555
PHACTR2	0.225453
CHIC2	0.225411
USP15	0.225227
KIF2A	0.225104
RBCK1	0.224904
ENSSSCG00000029857	0.224611
CD48	0.22449
ACP1	0.224341
MFNG	0.224258
ENSSSCG00000004583	0.224222
SF3A3	0.224126
ARF5	0.224034
C1orf35	0.223856
CMAS	0.223709
RASA2	0.223672
ENSSSCG00000006260	0.22367
APOBEC3B	0.223666
INPP4B	0.223625
BAD	0.223609
PGRMC2	0.223427
UBQLN1	0.223395
ATP6V0B	0.223215
JMJD1C	0.223172
THRAP3	0.223111
CLINT1	0.223081
AGO3	0.222817
CINP	0.222596
VPS36	0.222487
CHID1	0.222295
MLF2	0.222236
MRPS15	0.22221
FUNDC2	0.222204
PML	0.221817
NPC2	0.221762
HMGA1	0.221749
DERA	0.221723
ENSSSCG00000027778	0.221624
TRAPPC2L	0.221575
ACOX1	0.221438
ENSSSCG00000032942	0.221394
ENSSSCG00000008352	0.221195
HSPA9	0.22112
MED4	0.220848
PTPN1	0.220557
AKR1A1	0.220504
AIP	0.22044
ENSSSCG00000007203	0.220114
ENSSSCG00000004307	0.220047
ENSSSCG00000006628	0.219844
DDRGK1	0.21973
NDUFV2	0.219683
EMG1	0.219497
ENSSSCG00000010674	0.219443
ENSSSCG00000013453	0.219297
ZFAND5	0.219243
SSBP1	0.218812
LSM7	0.218644
GOLGB1	0.218263
TMEM147	0.218249
SVIL	0.217992
ARL6IP6	0.21798
TRAPPC3	0.217963
MRPL21	0.217782
NDUFC2	0.217606
RAB24	0.217567
HIST1H2AB	0.217557
NUDT1	0.21753
BRWD1	0.217418
BRMS1	0.217131
IDH2	0.217092
AGTRAP	0.216919
PDS5A	0.21689
TOX	0.216711
NUDT5	0.216643
M6PR	0.216561
TAF11	0.216375
BTG2	0.21625
CXCR4	0.216146
MRPS11	0.215744
SDHB	0.21573
NDUFB6	0.215651
CKS1B	0.215314
NAA38	0.21528
ARFGAP1	0.215181
CAPRIN1	0.214851
ZNF800	0.214836
PIGY	0.214585
YKT6	0.213961
GPD1	0.213783
TERF1	0.213762
RER1	0.213639
GCHFR	0.213579
CCDC90B	0.213295
ENSSSCG00000012654	0.213116
DARS	0.212995
ENSSSCG00000010795	0.212734
AURKAIP1	0.212117
UBR3	0.212112
BUD31	0.211627
SS18L2	0.211562
NDUFAF3	0.211561
EVI2B	0.211486
ENSSSCG00000013155	0.21148
ENSSSCG00000031730	0.211273
CKS2	0.211234
BRD2	0.211148
LY6E	0.211114
NOP58	0.211113
DYNLRB1	0.211048
ZC3H12D	0.211016
IAH1	0.210961
FMNL1	0.210827
GNB1	0.210667
PSMD13	0.210572
ENSSSCG00000025305	0.210529
ENSSSCG00000003885	0.210325
NXT1	0.210219
STUB1	0.210159
TNNI2	0.21012
POLR2I	0.210112
SPOP	0.209943
CD86	0.209882
RAB10	0.209777
TMC8	0.209651
ENSSSCG00000007253	0.209543
PARP12	0.209372
LIG3	0.209289
KDELR1	0.209287
VPS25	0.208797
GNAI3	0.208751
NDUFA11	0.208516
NDUFB2	0.208439
SLU7	0.208431
SSBP4	0.208362
DOCK8	0.208218
TIMM10	0.208062
ENSSSCG00000035611	0.208011
CHD2	0.207989
VSIR	0.207863
ENSSSCG00000035048	0.207848
VEZF1	0.207735
ENSSSCG00000006830	0.20773
ENSSSCG00000023160	0.207649
POLR2D	0.207516
CHTOP	0.207343
CCSER2	0.207173
PUF60	0.207171
ETFB	0.207126
ENSSSCG00000005436	0.207101
FAM192A	0.206985
ENSSSCG00000032591	0.206892
RAB1A	0.206763
ENSSSCG00000011290	0.206348
FYN	0.206279
PPP1CB	0.20625
DPM2	0.206224
CCS	0.206216
NBR1	0.205644
ENSSSCG00000028097	0.205595
ITSN2	0.205462
ENSSSCG00000000377	0.205022
ENSSSCG00000017868	0.204978
BTF3L4	0.204822
NDUFA6	0.204779
WDR13	0.204721
HLCS	0.204645
AUP1	0.204417
ADSL	0.204328
EMD	0.204306
ANKRA2	0.204187
PTP4A1	0.204183
SRSF9	0.204063
EI24	0.203858
OGFOD2	0.203828
TP53	0.203744
SUPT16H	0.203741
TBC1D10C	0.203674
GGNBP2	0.20344
HTATIP2	0.203372
MAPKAP1	0.203031
DR1	0.20297
ENSSSCG00000036483	0.202929
VAMP5	0.202896
PSMB10	0.202789
RNF10	0.202756
C12orf57	0.202732
PSMD14	0.202698
ENSSSCG00000035209	0.202482
SAMM50	0.202365
ENSSSCG00000010104	0.202337
EMC3	0.20229
ENSSSCG00000037054	0.202222
ENSSSCG00000006559	0.202206
RAB18	0.20205
EBNA1BP2	0.201992
TXNL1	0.20192
RNF166	0.201888
NBN	0.201596
CAMTA2	0.20137
PPM1A	0.201288
TNIK	0.201198
CD84	0.201014
DKC1	0.201002
HBS1L	0.200995
ENSSSCG00000036595	0.200993
ENSSSCG00000008057	0.200973
LMAN2	0.200956
OSBPL8	0.20095
CISD2	0.200919
UBXN4	0.200808
DDOST	0.200688
DUSP1	0.200371
MDH1	0.200265
LAMTOR1	0.200247
UBE2G1	0.200163
ENSSSCG00000017671	0.200106
SDF2	0.200073
ENSSSCG00000009633	0.200056
STRN3	0.200027
PHF3	0.200012
RFXANK	0.199976
ENSSSCG00000001505	0.199976
RAD21	0.199809
ENSSSCG00000002449	0.199755
BRD7	0.199513
TXK	0.199301
FKBP5	0.199286
ENSSSCG00000020808	0.198963
NPRL2	0.198919
ENSSSCG00000009128	0.198762
TECR	0.198591
CAPN1	0.198537
GCC2	0.198284
CDC5L	0.198212
DNAJC10	0.197817
SARS	0.197738
BZW2	0.197629
ENSSSCG00000007947	0.197468
TAPBP	0.197392
RAB1B	0.197052
2021-09-09	0.19705
ENSSSCG00000017146	0.197042
DHX36	0.196999
PDIA3	0.196991
DDX3Y	0.196949
ENSSSCG00000003771	0.196818
ENSSSCG00000006324	0.196757
MPP1	0.196651
TXNDC9	0.196619
LSM8	0.196584
FNBP1	0.196556
SERPINB9	0.196547
ENSSSCG00000009341	0.196483
SREK1	0.19642
USP47	0.196414
THEMIS	0.196344
MRPL40	0.196288
FAM104A	0.196215
ITK	0.196172
NUDT9	0.195919
DAP3	0.195867
NUP50	0.195824
PAXX	0.195652
SETX	0.195565
CSRP1	0.195435
PPP1R12A	0.195235
STAG2	0.195126
PPIL2	0.195065
RAB35	0.195059
CCDC115	0.194926
PRPF6	0.194674
RTN4	0.194636
C14orf119	0.194603
AP1S1	0.194524
TCP1	0.194516
SETD5	0.194295
ENSSSCG00000012517	0.194236
WAPL	0.194161
KCNAB2	0.194121
UBE2K	0.194091
WASHC3	0.194029
FKBP3	0.193934
TNIP1	0.19385
CYLD	0.193626
PCNA	0.19353
SLC25A39	0.193467
BET1	0.193432
TFRC	0.193399
TMEM141	0.193379
MOB3A	0.193309
FBXO39	0.193145
CCDC59	0.193039
DGKA	0.193036
ENSSSCG00000040827	0.193009
TUBA4A	0.192932
RSL1D1	0.192901
ENSSSCG00000037299	0.192893
ENSSSCG00000014618	0.192867
SDHD	0.192864
NEMF	0.192765
PPP2R5A	0.192626
MMD	0.192555
TNRC6C	0.192434
SMPD1	0.192378
GON7	0.192356
TAP1	0.192192
LSM3	0.192156
ENSSSCG00000039407	0.191971
ENSSSCG00000016323	0.191615
EXOSC5	0.19143
PLSCR3	0.191381
ST8SIA1	0.191224
FIP1L1	0.191197
HNRNPD	0.190991
RIC8A	0.190949
SMC6	0.190769
NKX3.1	0.190721
DCTN3	0.190711
CHORDC1	0.1907
PTTG1IP	0.190626
DOCK2	0.190522
NAPRT	0.19033
CCSAP	0.190125
PDAP1	0.190016
DERL1	0.189997
ORAI3	0.189997
MAPK1IP1L	0.189915
ABHD17B	0.189834
NCOR1	0.189521
IRF2	0.189464
NDUFAF8	0.189207
ATP5F1D	0.188913
PSMD2	0.188866
EPS15	0.188681
SMARCA5	0.188575
PSMC1	0.18857
SHOC2	0.188539
ENSSSCG00000009792	0.188539
ENSSSCG00000002036	0.18821
MRPL11	0.188182
TPST2	0.188012
CDCA7L	0.187873
ENSSSCG00000015434	0.187576
ANXA11	0.187456
SNRPA1	0.187257
SUGT1	0.187231
FAM120A	0.18718
KIF5B	0.186846
ENSSSCG00000000500	0.186764
CEP192	0.186744
NIFK	0.186649
RASSF2	0.186501
USP3	0.18648
VCP	0.186446
KPNA1	0.186349
FBL	0.186275
AP3B1	0.186249
TMUB1	0.186223
ZFR	0.186162
PPP2R1A	0.186128
UBA5	0.186102
MRPS26	0.186073
ENSSSCG00000031530	0.186006
OPTN	0.185807
APRT	0.185708
UPF3B	0.185685
RRP1B	0.185605
EAPP	0.185541
ELL	0.185504
SGCA	0.185462
USP18	0.185434
MCRIP1	0.185417
MTCH1	0.185346
RCN2	0.185308
CDK9	0.185232
SELENOP	0.185147
ENSSSCG00000034072	0.185088
ATAD1	0.184914
TM9SF3	0.184812
MOB1A	0.184718
IL4R	0.184531
ENSSSCG00000005658	0.184514
PLGRKT	0.1845
BCL10	0.184445
VCL	0.184417
CAB39L	0.184373
SLC38A2	0.184299
USP5	0.184275
PHKG2	0.184227
SLTM	0.184183
CAST	0.184137
ENSSSCG00000030002	0.184137
PHF5A	0.184115
RAB28	0.184115
RNF114	0.184101
CSNK1D	0.184006
OTUB1	0.183812
ZBTB18	0.183787
SNRNP40	0.183524
ENSSSCG00000007322	0.183452
TRIM38	0.183368
PPP4C	0.183349
ADGRG5	0.183273
IKZF1	0.183035
ENSSSCG00000014280	0.182993
IFNAR1	0.182736
TMOD3	0.1827
ENSSSCG00000017165	0.182696
PTGES3	0.182561
PSENEN	0.182529
PET100	0.182409
SLA.DMA	0.182375
TSR3	0.182281
CEBPZOS	0.182254
CCNL1	0.182235
RHOF	0.182148
LDLRAP1	0.182129
POLD3	0.182122
KPNB1	0.18207
ATP1A1	0.182055
CCND2	0.181997
POLDIP2	0.181967
ACP5	0.181918
TMED10	0.181875
MATK	0.181716
FH	0.181598
ATOX1	0.181595
PAFAH1B3	0.181404
RASSF4	0.181364
FIBP	0.181332
NRBP1	0.181299
RAB5C	0.181214
TMEM109	0.181134
STRADB	0.180993
UBE2V2	0.180876
TGIF1	0.180802
NR3C1	0.180775
ZNFX1	0.180703
DNMT1	0.180682
ACIN1	0.180666
COPS2	0.180654
MOV10	0.180653
LAMP1	0.180606
GOLGA7	0.180593
CCDC142	0.18058
CORO1C	0.180498
SNRPC	0.180459
MDH2	0.180422
ENSSSCG00000011678	0.180344
NT5C2	0.180319
TIMP1	0.18017
MTF2	0.180165
ATF7IP	0.180013
HDGF	0.179886
NCKAP1L	0.17979
CENPC	0.179785
ENSSSCG00000022058	0.179681
CCNDBP1	0.179629
ENSSSCG00000012757	0.179546
MYCBP2	0.179493
CEP350	0.179464
PARP1	0.179318
ENSSSCG00000004415	0.179271
PIGK	0.17927
GSPT2	0.179262
C12orf73	0.179172
HIKESHI	0.179111
EMC8	0.179091
ENSSSCG00000022906	0.179071
CTSB	0.178974
KDSR	0.178894
CCDC50	0.178889
GOLPH3L	0.178843
YAF2	0.178785
UCHL5	0.178591
ANKHD1	0.178426
MRPL44	0.17834
R3HDM4	0.178231
URM1	0.17798
RSRP1	0.177897
RIOK3	0.177821
NFKB1	0.177805
JOSD2	0.177744
SDHC	0.177697
LENG8	0.17768
ATG5	0.177616
ENSSSCG00000036658	0.177608
EIF4A3	0.17726
HERPUD1	0.177242
GTF2F1	0.177037
DAZAP1	0.176987
CDIPT	0.176935
ARL4C	0.176813
ENSSSCG00000012382	0.176594
GIT2	0.17635
SERINC3	0.176179
TMEM11	0.176146
ENSSSCG00000011798	0.176083
ST6GALNAC4	0.176061
ENSSSCG00000014969	0.175937
ZDHHC20	0.175813
MGAT1	0.175754
SCFD1	0.175529
REV3L	0.175488
PPIH	0.175486
NRROS	0.175408
ENSSSCG00000039635	0.175265
NABP1	0.175228
CSE1L	0.175213
ENSSSCG00000007749	0.175016
PLEKHA2	0.175014
ENSSSCG00000014013	0.175008
MAPRE2	0.174773
AKNA	0.174743
ENSSSCG00000000148	0.174737
ENSSSCG00000007031	0.174716
SRA1	0.17463
NRAS	0.174536
UBL4A	0.17447
SLC4A7	0.174103
ZNF580	0.1741
TOR4A	0.174095
BRIX1	0.174034
MICOS13	0.173883
SMIM7	0.173871
FAM43A	0.173825
CWC25	0.173767
MTIF2	0.173689
IPO5	0.173685
CTDSPL2	0.173605
ATL3	0.173569
ARFGEF1	0.173462
GPN3	0.17318
PCMT1	0.173035
DUSP11	0.173017
WDR45	0.172962
ENSSSCG00000033089	0.172934
SAFB	0.172929
PPP2R1B	0.172898
PSMD7	0.172876
ENSSSCG00000039980	0.17255
RPA3	0.172277
EEF1AKMT1	0.17224
ZC3H13	0.17222
AFTPH	0.17219
TNFSF10	0.172181
COA6	0.172083
TMEM243	0.171931
REV1	0.171864
ANKRD44	0.171837
CYB5B	0.17179
PLSCR1	0.171789
PRPF31	0.171754
RNH1	0.171706
CHCHD10	0.171682
STK10	0.171664
VPS72	0.171637
THAP7	0.17149
FAM118B	0.171425
GSR	0.171301
DGKZ	0.171276
MRPS6	0.171016
MYDGF	0.170837
ICOS	0.17082
TTC39C	0.170817
RABGGTB	0.170719
RAB8A	0.170702
SRSF7	0.17068
THUMPD3	0.170573
TIPRL	0.170569
TELO2	0.170417
TOMM7	0.170342
GOT2	0.170155
RASAL3	0.170102
SEC13	0.1701
VAPA	0.170053
SMAP1	0.169863
TRIM56	0.169827
ACADVL	0.169805
RESF1	0.169699
CPNE1	0.169683
NPTN	0.169666
TRIB2	0.169611
PPP2R5E	0.169526
UXT	0.169376
GPS1	0.169216
HSBP1	0.169215
PAIP1	0.169128
MGMT	0.169121
PRDX5	0.169052
COX6A2	0.169024
EIF4E	0.168932
RNF138	0.168914
COPZ1	0.168889
TRIP12	0.168712
GSTA4	0.168711
CPNE3	0.168557
RALA	0.168535
MAZ	0.168525
ENSSSCG00000037399	0.168428
WDR12	0.168221
CD80	0.16811
ZNF638	0.168104
DDX3X	0.168082
ACAT1	0.168053
ILF3	0.168053
ENSSSCG00000040586	0.168021
BYSL	0.167955
TMEM9B	0.167952
STK26	0.167924
CDC26	0.167863
ENSSSCG00000034711	0.167848
YBEY	0.167798
LAT2	0.167795
ENSSSCG00000009788	0.167702
CCNB1IP1	0.167663
GORASP2	0.167386
ZC3H7A	0.167342
POP7	0.167081
KRR1	0.167076
ENSSSCG00000035686	0.167024
TBCC	0.166864
TASOR	0.166801
DLD	0.166801
VPS26A	0.16674
JKAMP	0.166728
FAM53B	0.166716
YIPF5	0.166388
ENSSSCG00000010685	0.166344
ENSSSCG00000036224	0.166322
TKT	0.166203
SKA2	0.166152
PTPA	0.166105
IK	0.16607
CIAO2A	0.165873
C20orf27	0.165855
PCOLCE	0.165831
ACBD6	0.165628
CCDC25	0.165551
CDC42EP3	0.165442
ENSSSCG00000016970	0.165426
MOSPD3	0.165346
EXOC4	0.165247
FAM173A	0.165154
ENSSSCG00000015664	0.165096
TERF2IP	0.164958
UQCRC2	0.16481
MRPS9	0.164794
BAX	0.164762
BRD3	0.164676
MARK2	0.164579
ENSSSCG00000002996	0.164566
DOCK10	0.164462
INIP	0.164399
ENSSSCG00000009934	0.164234
ENSSSCG00000009241	0.16412
NUFIP2	0.16405
[truncated: 12,388 more rows]

## Sheet: 3v4_Permutation
Supplementary File 11. Random forest pair-wise analyses of CD4+ αβ T-cell clusters. For each model represented below the porcine scRNA-seq cluster IDs compared are shown along with the parameters used and resulting OOB prediction error. Variable importance was assigned by measuring node impurity (Impurity) and using permutations (Permutation). Features that reduced error in predictive accuracy ar…
Gene	Permutation
COX1	0.00328986
ENSSSCG00000037142	0.00304955
S100A6	0.00255684
TMSB10	0.00233138
ENSSSCG00000003930	0.00219836
S100A11	0.00191096
S100A4	0.00188854
LGALS1	0.00181952
ENSSSCG00000034617	0.0017934
ENSSSCG00000003042	0.00176332
ACTG1	0.00170402
COX2	0.00156432
GPX1	0.00143177
COX3	0.00141096
RPS27	0.00138244
LTB	0.00121167
RPL35	0.0011856
ENSSSCG00000036618	0.00115057
RPS16	0.00114314
CCR7	0.00114012
RPS3A	0.001017
C15orf48	0.00100983
TRAT1	0.000970388
ACTB	0.000955163
RPL23	0.00090053
RPL34	0.000850631
CD74	0.000845851
RPS15	0.000784786
HLA.DRA	0.000760309
ENSSSCG00000039544	0.000749275
DUT	0.000723621
BTG1	0.000690418
ENSSSCG00000035768	0.000688905
ENSSSCG00000014855	0.000673345
IFI6	0.000659405
LSP1	0.000639511
IKZF3	0.000592955
RPL6	0.000573353
ENSSSCG00000004489	0.000565026
ENSSSCG00000040273	0.000553612
ARPC3	0.000513913
ENSSSCG00000035080	0.000510856
MYL6	0.000504927
ENSSSCG00000035811	0.000477915
CYTB	0.000471494
SLA.DQB1	0.000446981
CCL5	0.000445
S100A10	0.000442341
ISG20	0.000440398
RPS23	0.000432786
CD52	0.000417124
RPL5	0.000407486
BST2	0.000395651
RPS11	0.000394623
SH3BGRL3	0.000390325
RPS13	0.000386768
RPS12	0.000382075
NKG7	0.000370899
RPL9	0.000367069
RPS6	0.000357714
ENSSSCG00000005453	0.000356892
EEF1B2	0.000340989
ENSSSCG00000001455	0.000338997
ENSSSCG00000016903	0.00033437
ATP6	0.000331302
ENSSSCG00000001456	0.000330329
RPL22	0.000327102
GZMK	0.00032498
DDX5	0.000323251
ENSSSCG00000031088	0.000323043
ISG15	0.000319258
RDX	0.000315928
PABPC1	0.00030912
RPL17.C18orf32	0.000306981
RPS18	0.000299098
RACK1	0.000296821
ENSSSCG00000025928	0.000293922
BATF	0.000292281
RPL11	0.000291978
IKZF2	0.000277117
ENSSSCG00000004970	0.000275247
RPL37	0.000271344
PLAAT3	0.000271054
TNFRSF1B	0.00026794
ENSSSCG00000027573	0.000257802
SCML4	0.000256814
ENSSSCG00000018063	0.000256343
COX5B	0.000252958
HSD11B1L	0.000252351
CTLA4	0.000248186
ND4	0.000248142
RPL3	0.000239536
SELL	0.000238729
RPS14	0.000233884
ITM2C	0.000228455
ENSSSCG00000011272	0.000221726
ENSSSCG00000024974	0.000219396
ENSSSCG00000034448	0.000207308
PLAC8	0.000200783
LAPTM5	0.000195111
ENSSSCG00000038507	0.000194971
ANXA2	0.000190029
CD99	0.000189192
EIF4A2	0.000188424
CALM1	0.000187222
IFIT1	0.000180111
RPL10	0.000179876
LAG3	0.000177173
IL7R	0.000176887
PDK1	0.000173906
RHOC	0.000173189
COX6C	0.000171346
ARPC4	0.000170204
CGA	0.000168641
ENSSSCG00000013064	0.000168285
GLIPR1	0.000163241
ENSSSCG00000032166	0.000161962
SRGN	0.000159023
ENSSSCG00000033697	0.000153423
BCAS4	0.000148465
CFL1	0.000146767
RPLP2	0.000145529
RPLP0	0.000141993
ENSSSCG00000009303	0.000141646
CTSC	0.000141559
ENSSSCG00000017239	0.000140989
SEC61B	0.000140082
GZMB	0.000139203
ENSSSCG00000031897	0.000137912
ENSSSCG00000033019	0.00013632
TCF7	0.000134459
ENSSSCG00000029596	0.000133873
TPT1	0.000133646
ENSSSCG00000017509	0.000129341
ENSSSCG00000000576	0.000128993
SNRPE	0.000127763
VIM	0.000125718
COX8A	0.000124911
ENSSSCG00000034019	0.000121897
YWHAZ	0.000121291
ZBTB32	0.000120734
RPL7A	0.000120493
RPS4X	0.000118928
F2R	0.000118092
GAPDH	0.000117514
ITGB1	0.000114994
PFN1	0.000114111
FLNA	0.000112726
ENSSSCG00000033721	0.000112431
ENSSSCG00000006380	0.000112378
RPL27	0.000111978
DBI	0.000111918
ENSSSCG00000030300	0.000111033
NME2	0.000109684
ENSSSCG00000039582	0.000107599
UBC	0.000107343
ENSSSCG00000014565	0.000106911
HNRNPH3	0.000106565
GZMM	0.000104748
UBE2D3	0.000104576
HSPA8	0.000103653
ENSSSCG00000013597	0.000103536
ENSSSCG00000024263	0.000103085
ENSSSCG00000004945	9.87026e-05
VMP1	9.82055e-05
STX11	9.78734e-05
TWF2	9.70186e-05
CXCR3	9.62181e-05
SON	9.5729e-05
ENSSSCG00000006395	9.15823e-05
ARF6	8.97195e-05
ARPC2	8.88351e-05
ENSSSCG00000033733	8.87018e-05
HMGN2	8.84518e-05
TRMT112	8.81512e-05
PRDX2	8.69841e-05
ENSSSCG00000028485	8.65718e-05
RPL7	8.5871e-05
PNRC1	8.41801e-05
CALM3	8.26831e-05
ENSSSCG00000024973	8.1831e-05
PSMB9	8.06633e-05
HSH2D	8.00903e-05
PNISR	7.97109e-05
ENSSSCG00000001229	7.9499e-05
RPS10.NUDT3	7.92271e-05
TRIM56	7.7018e-05
ID3	7.70036e-05
TNFAIP3	7.65019e-05
ENSSSCG00000016226	7.64156e-05
ENSSSCG00000036296	7.58227e-05
SH2D1A	7.5815e-05
ENSSSCG00000037030	7.48954e-05
RCAN3	7.47546e-05
SNRPF	7.46534e-05
TUBA1B	7.42628e-05
POMP	7.41927e-05
RAC2	7.27145e-05
ND5	7.23988e-05
MT3	7.2029e-05
NDUFB11	7.19061e-05
ENSSSCG00000038351	7.18912e-05
COTL1	7.12844e-05
ARPC5	7.11637e-05
ENSSSCG00000006081	7.08957e-05
RAN	7.06035e-05
ENSSSCG00000006919	7.03843e-05
STMN1	7.02184e-05
TPM4	6.91643e-05
HNRNPM	6.89708e-05
IL6ST	6.8941e-05
RPS5	6.87335e-05
MX1	6.85812e-05
TPM3	6.81088e-05
ENSSSCG00000008433	6.78129e-05
ADD3	6.75527e-05
GRB2	6.70783e-05
NDUFA6	6.70179e-05
IFI44L	6.57432e-05
SNF8	6.53312e-05
EIF1	6.51346e-05
ENSSSCG00000021591	6.45943e-05
PTMA	6.41693e-05
GABARAP	6.3599e-05
SUSD3	6.35594e-05
WDR1	6.34953e-05
ENSSSCG00000014569	6.33801e-05
GNB2	6.33714e-05
UBASH3A	6.30839e-05
ATP6V1G1	6.24044e-05
GMFG	6.17494e-05
CLTA	6.15214e-05
SAMHD1	6.13198e-05
ENSSSCG00000011952	6.10624e-05
OCIAD1	6.10181e-05
DDX17	6.0978e-05
ENSSSCG00000000905	6.09721e-05
PPP1R18	6.08431e-05
EMB	6.07846e-05
RPL26	6.07173e-05
OSTF1	6.06623e-05
ENSSSCG00000039460	5.9435e-05
ENSSSCG00000039071	5.92297e-05
MBNL1	5.92192e-05
CTSH	5.91929e-05
JAK1	5.91361e-05
COX7B	5.88094e-05
TRIM22	5.88066e-05
FYB1	5.72651e-05
WASHC3	5.72586e-05
ENSSSCG00000013596	5.72567e-05
SLC25A5	5.71781e-05
RPL10A	5.71677e-05
LCP1	5.71584e-05
RPN2	5.70589e-05
ENSSSCG00000025499	5.70226e-05
ENSSSCG00000038711	5.69422e-05
ENSSSCG00000007088	5.67577e-05
MRPS25	5.57336e-05
ATP5PO	5.57146e-05
VAMP5	5.55183e-05
RBBP4	5.54339e-05
HIGD2A	5.51797e-05
STARD4	5.51587e-05
COX4I1	5.49801e-05
LEF1	5.4965e-05
PSMB8	5.49325e-05
CCND3	5.48588e-05
ENSSSCG00000031730	5.48476e-05
BZW1	5.47897e-05
NOP53	5.47334e-05
EPSTI1	5.40902e-05
ENSSSCG00000036350	5.35922e-05
DAPL1	5.34132e-05
CHTOP	5.33597e-05
UBE2L6	5.31174e-05
STRAP	5.30666e-05
SSR3	5.30552e-05
ENSSSCG00000036716	5.28241e-05
ZNF207	5.25011e-05
TMA7	5.23805e-05
ENSSSCG00000001341	5.22984e-05
ENSSSCG00000035256	5.22506e-05
NDUFS8	5.22129e-05
ARPC5L	5.20048e-05
ENSSSCG00000027491	5.13607e-05
SELENOH	5.12367e-05
TRAPPC2L	5.10065e-05
ENSSSCG00000011117	5.08699e-05
TRAM1	5.08107e-05
ENSSSCG00000035224	5.07378e-05
ENSSSCG00000027085	5.05216e-05
HMGB2	5.03004e-05
ALG13	4.96418e-05
POU2F2	4.94655e-05
CSTB	4.92263e-05
ENSSSCG00000006363	4.92025e-05
DBNL	4.90258e-05
ENSSSCG00000001779	4.88766e-05
SSR4	4.87676e-05
TMEM123	4.85977e-05
RPL39	4.82043e-05
REX1BD	4.79593e-05
ARID4B	4.7632e-05
FAM129A	4.75548e-05
SLA2	4.75138e-05
THYN1	4.74523e-05
APBB1IP	4.74461e-05
S100A13	4.73e-05
SSBP4	4.72849e-05
SH3GLB1	4.72202e-05
COX7A2	4.7218e-05
MYO1F	4.70242e-05
MPHOSPH8	4.68949e-05
ENSSSCG00000000377	4.67214e-05
CTSS	4.66792e-05
SHKBP1	4.65492e-05
ISCU	4.65289e-05
PPIL2	4.65179e-05
ENSSSCG00000007743	4.65174e-05
ENSSSCG00000027826	4.63231e-05
TSPO	4.56057e-05
FTL	4.55068e-05
RNASEH2B	4.54852e-05
EPN1	4.54366e-05
ATP5MC1	4.52863e-05
MMADHC	4.51906e-05
COX17	4.51749e-05
MICOS10	4.51042e-05
UBE2V1	4.49683e-05
BAG1	4.47775e-05
FGD3	4.47759e-05
CGAS	4.44276e-05
HIST1H2AB	4.43758e-05
EEF2	4.437e-05
RPS9	4.36583e-05
IVNS1ABP	4.35401e-05
RBCK1	4.35399e-05
PML	4.35002e-05
POLR2K	4.32207e-05
TIMM10	4.31371e-05
ENSSSCG00000014296	4.30701e-05
ENSSSCG00000013878	4.29926e-05
ENSSSCG00000016990	4.29652e-05
HMCES	4.28791e-05
CITED2	4.28352e-05
B2M	4.2812e-05
PSMB4	4.25254e-05
HSP90AA1	4.23607e-05
MOB3A	4.21191e-05
RTRAF	4.17907e-05
SRSF6	4.17646e-05
ENSSSCG00000012916	4.17019e-05
ENSSSCG00000028663	4.16721e-05
SOD1	4.1548e-05
RASSF4	4.15044e-05
ENSSSCG00000007031	4.12476e-05
NDUFA11	4.11641e-05
SSR2	4.11536e-05
ENSSSCG00000015710	4.11504e-05
PTBP1	4.11342e-05
NUFIP2	4.10973e-05
FLI1	4.1094e-05
MOV10	4.10759e-05
ENSSSCG00000035520	4.10727e-05
GPSM3	4.10606e-05
SLA	4.09167e-05
SMPD1	4.08164e-05
ENSSSCG00000015040	4.04036e-05
TMBIM6	3.98443e-05
ENSSSCG00000023158	3.97462e-05
CTSD	3.97057e-05
AGO3	3.96323e-05
ENSSSCG00000036114	3.96164e-05
TVP23C	3.95746e-05
SLA.DMA	3.95654e-05
LSM14A	3.95572e-05
SERPINI1	3.94956e-05
ENSSSCG00000033909	3.94078e-05
RASSF5	3.93119e-05
CCR5	3.91025e-05
PIGY	3.9082e-05
NCK1	3.90636e-05
SDF4	3.90163e-05
UTRN	3.9015e-05
ENSSSCG00000002505	3.89939e-05
UFD1	3.8874e-05
RAP1B	3.88429e-05
MIEN1	3.83984e-05
IFITM3	3.81212e-05
ENSSSCG00000039581	3.80467e-05
ENSSSCG00000000185	3.78442e-05
MYL9	3.7768e-05
NCL	3.77379e-05
GPX4	3.76555e-05
ARFGAP3	3.75565e-05
ARGLU1	3.75463e-05
DHX15	3.7458e-05
ENSSSCG00000006559	3.73466e-05
ANGEL2	3.73388e-05
ENSSSCG00000037071	3.72918e-05
ENSSSCG00000011798	3.71766e-05
PFDN4	3.70959e-05
ENSSSCG00000003348	3.67992e-05
MED21	3.67873e-05
ENSSSCG00000033500	3.67644e-05
BOLA3	3.65353e-05
CFLAR	3.5954e-05
H2AFV	3.57979e-05
ARHGAP30	3.56958e-05
EIF3L	3.55795e-05
BIRC3	3.54006e-05
ENSSSCG00000036988	3.53949e-05
ELAVL1	3.53074e-05
CHMP2A	3.53039e-05
SURF4	3.52539e-05
AHNAK	3.51274e-05
MRPS33	3.51148e-05
CAPG	3.51032e-05
RALY	3.51026e-05
CIR1	3.50938e-05
FERMT3	3.50821e-05
VPS4B	3.48521e-05
ENSSSCG00000012961	3.41115e-05
NRROS	3.38776e-05
ENSSSCG00000010158	3.38515e-05
PPP1CA	3.37577e-05
LXN	3.3746e-05
PSMA4	3.36679e-05
TOMM7	3.36466e-05
PPP2CA	3.35995e-05
ENSSSCG00000040248	3.35558e-05
GPR174	3.35259e-05
CAPN1	3.35141e-05
RSAD2	3.35002e-05
SGCA	3.35001e-05
HSPD1	3.34825e-05
GDI2	3.34576e-05
C5orf24	3.34475e-05
EIF4B	3.34415e-05
OAZ1	3.34331e-05
ENSSSCG00000009788	3.33835e-05
LIMD2	3.3382e-05
PRRC2C	3.33819e-05
ENSSSCG00000016475	3.33693e-05
FAM89A	3.33396e-05
PFDN1	3.33133e-05
HNRNPDL	3.32328e-05
ENSSSCG00000039249	3.30933e-05
EIF2S2	3.28843e-05
NPL	3.28338e-05
MAPK1IP1L	3.19138e-05
TMEM173	3.19087e-05
ENSSSCG00000015337	3.18916e-05
SMC4	3.1686e-05
NDUFB9	3.16514e-05
CNST	3.1641e-05
TOPORS	3.16042e-05
TMEM263	3.15671e-05
RBM5	3.15321e-05
CCNG1	3.15291e-05
JAML	3.15082e-05
ITK	3.14861e-05
PLEKHB2	3.14577e-05
MRPL17	3.14128e-05
SVIL	3.13621e-05
SRPK2	3.1349e-05
AOAH	3.13457e-05
LAP3	3.13435e-05
SPTBN1	3.13377e-05
SLC4A7	3.132e-05
NFKBIZ	3.13189e-05
ZKSCAN1	3.13187e-05
CD48	3.12886e-05
EIF4H	3.12572e-05
ENSSSCG00000011676	3.12238e-05
ID2	3.11904e-05
UCK1	3.11852e-05
POLR2F	3.10909e-05
PHB	3.10894e-05
NONO	3.10486e-05
RBM18	3.10451e-05
ENSSSCG00000002907	3.10113e-05
SASH3	3.09362e-05
AP2S1	3.09101e-05
ENSSSCG00000027746	3.04629e-05
AQP3	3.03062e-05
BRWD1	3.00688e-05
ENSSSCG00000008170	3.00043e-05
AGA	2.99715e-05
SELENOP	2.97966e-05
GPBP1	2.97808e-05
CYLD	2.97783e-05
URI1	2.97457e-05
RAP2B	2.96515e-05
ZNRD1	2.96167e-05
VAMP8	2.95888e-05
CRADD	2.95348e-05
TMEM160	2.9526e-05
ENSSSCG00000014267	2.94684e-05
GYPC	2.94637e-05
OGFOD2	2.94436e-05
RAB27A	2.94063e-05
ARID1A	2.94034e-05
FAS	2.93988e-05
SF3A1	2.93734e-05
SIRT2	2.93732e-05
GPN3	2.93459e-05
SDCBP	2.93315e-05
LHPP	2.9323e-05
ENSSSCG00000029251	2.93132e-05
ETFB	2.92928e-05
TMC8	2.92096e-05
FAM118B	2.91178e-05
EVL	2.90937e-05
ENSSSCG00000000500	2.90808e-05
RPS20	2.88746e-05
CMPK2	2.87522e-05
GABARAPL2	2.85944e-05
PDCD1	2.80442e-05
CNPY3	2.79489e-05
PCMT1	2.79168e-05
PSMC4	2.79124e-05
RNF7	2.78907e-05
HBS1L	2.78475e-05
ENSSSCG00000006830	2.78319e-05
ENSSSCG00000022912	2.78303e-05
ARFGEF1	2.7823e-05
SARNP	2.7817e-05
BNIP3	2.77615e-05
ERAP2	2.77449e-05
MTF2	2.77177e-05
SCAF11	2.77113e-05
RANBP6	2.76427e-05
EPB41	2.75958e-05
TMEM70	2.75916e-05
SNAPIN	2.75445e-05
LNPEP	2.75214e-05
OGA	2.75111e-05
TAP1	2.75016e-05
CTSA	2.7501e-05
MAT2A	2.74919e-05
MAX	2.74843e-05
ENSSSCG00000039731	2.74827e-05
GOLM1	2.74324e-05
GNB1L	2.73974e-05
FNBP4	2.7394e-05
RNASEH2C	2.73872e-05
KRTCAP2	2.73802e-05
JARID2	2.73662e-05
GUK1	2.73241e-05
TNNI2	2.73168e-05
IPO5	2.73066e-05
DCUN1D5	2.72919e-05
GBP2	2.7286e-05
PEF1	2.72848e-05
FUNDC1	2.72118e-05
ENSSSCG00000028479	2.7183e-05
MRPL24	2.718e-05
ENSSSCG00000020790	2.7176e-05
PSMB6	2.71659e-05
AHI1	2.71562e-05
FLII	2.71561e-05
RNF149	2.71128e-05
SRSF5	2.71114e-05
TNFSF10	2.70864e-05
PDIA3	2.68247e-05
COX6A1	2.65908e-05
ATAD1	2.60443e-05
NDUFB10	2.59949e-05
TRA2B	2.58766e-05
ZFP36L1	2.58647e-05
ENSSSCG00000033734	2.58301e-05
HSPA4	2.5791e-05
GSR	2.57429e-05
ENSSSCG00000004415	2.57365e-05
ENSSSCG00000021738	2.56665e-05
UBE3A	2.56435e-05
SETD2	2.56017e-05
ENSSSCG00000032134	2.55969e-05
KPNB1	2.55875e-05
MYDGF	2.55835e-05
COPS2	2.55778e-05
TSTA3	2.55735e-05
METTL23	2.55568e-05
ENSSSCG00000036096	2.55243e-05
CREB3	2.55135e-05
SUMO1	2.55133e-05
SREBF2	2.55095e-05
ORC4	2.54952e-05
PARP8	2.5484e-05
ARIH2	2.54055e-05
ELMO1	2.53952e-05
TSPAN5	2.53825e-05
SRPK1	2.53543e-05
SLC44A2	2.53528e-05
GNG2	2.53436e-05
TPD52L2	2.53415e-05
NDUFC1	2.53157e-05
DCTN3	2.53134e-05
SPTLC2	2.5301e-05
DAP3	2.52801e-05
MYO5A	2.52661e-05
ETFA	2.52629e-05
TFRC	2.5241e-05
ENSSSCG00000032073	2.52312e-05
HIF1A	2.51307e-05
RPS26	2.51215e-05
H3F3A	2.4374e-05
SIT1	2.42243e-05
NDUFS4	2.42037e-05
PIK3IP1	2.40848e-05
PSMA6	2.40724e-05
BAD	2.39909e-05
HDGF	2.39767e-05
DNASE1L1	2.39646e-05
IDH3G	2.39369e-05
ENSSSCG00000024776	2.39354e-05
PSME1	2.38988e-05
ENSSSCG00000027689	2.38602e-05
TRAF3IP3	2.38198e-05
ENSSSCG00000003903	2.37988e-05
TRIB2	2.37868e-05
CD69	2.37534e-05
ACYP1	2.37446e-05
KLHL5	2.37358e-05
NUB1	2.37347e-05
MLLT10	2.37321e-05
TBCC	2.36885e-05
PRPF6	2.36812e-05
CUEDC2	2.36771e-05
PARVB	2.36616e-05
RNPS1	2.36443e-05
SNAP29	2.36357e-05
RBMS1	2.3633e-05
NPM3	2.36329e-05
ENSSSCG00000036626	2.36314e-05
MCL1	2.36255e-05
ENSSSCG00000036658	2.36186e-05
ENSSSCG00000039046	2.36071e-05
CX3CR1	2.35775e-05
ZCCHC7	2.35741e-05
CCT3	2.35728e-05
C19orf66	2.3562e-05
CYB561D2	2.35306e-05
TXNDC15	2.35056e-05
FH	2.34983e-05
MRPS22	2.34897e-05
ENSSSCG00000009851	2.34745e-05
CALCOCO2	2.34417e-05
TSPAN31	2.34112e-05
DPM3	2.34059e-05
ARHGDIA	2.34025e-05
MRPS18A	2.33855e-05
FBXO22	2.33263e-05
SNRPN	2.3256e-05
NAP1L1	2.32402e-05
ENSSSCG00000017754	2.31401e-05
WDR37	2.31213e-05
NDUFS5	2.31159e-05
RAC1	2.30737e-05
SRI	2.23976e-05
ACRBP	2.20795e-05
DNAJB14	2.20507e-05
CD53	2.19902e-05
ENSSSCG00000006418	2.19817e-05
TNRC6B	2.198e-05
WDR26	2.19394e-05
DDX39B	2.19133e-05
NLRC5	2.19102e-05
SMC3	2.18921e-05
CMBL	2.18871e-05
NME1	2.18374e-05
UBR5	2.18301e-05
EPS15	2.17871e-05
HNRNPA1	2.17725e-05
BTF3	2.17665e-05
LAPTM4A	2.17433e-05
UFM1	2.16968e-05
A4GALT	2.16946e-05
ENSSSCG00000040056	2.16915e-05
PTGES3	2.16786e-05
EIF1AX	2.16778e-05
HEXIM2	2.1676e-05
POLDIP2	2.16747e-05
SRA1	2.16402e-05
FYN	2.16351e-05
MPC2	2.16339e-05
GATAD2A	2.16334e-05
TDP2	2.16263e-05
NDFIP1	2.16249e-05
IFI30	2.16204e-05
HES6	2.16135e-05
CDC25B	2.16084e-05
MUL1	2.16014e-05
ASB9	2.15907e-05
EIF2S1	2.15488e-05
ENSSSCG00000007944	2.15485e-05
HDAC1	2.15322e-05
RAB1A	2.15298e-05
MRPL41	2.15295e-05
NTAN1	2.15285e-05
UBALD2	2.1524e-05
ENSSSCG00000010931	2.15219e-05
JOSD2	2.15206e-05
PRPS1	2.1504e-05
ENSSSCG00000006870	2.14998e-05
KLF13	2.14956e-05
SGTA	2.1495e-05
PSMB2	2.14743e-05
TNRC6C	2.14728e-05
TXK	2.14581e-05
CCSER2	2.14543e-05
GCHFR	2.14392e-05
THRAP3	2.14316e-05
EIF5B	2.141e-05
ABLIM1	2.14045e-05
LDLRAP1	2.13839e-05
ACP5	2.13811e-05
RIDA	2.13749e-05
HACD4	2.13696e-05
CORO1C	2.13683e-05
ARL6IP1	2.13602e-05
BUD23	2.13426e-05
CD1D	2.1338e-05
KHK	2.13252e-05
POLR2G	2.13198e-05
CPPED1	2.12474e-05
CISD2	2.12428e-05
ZC3HAV1	2.12068e-05
NDUFA1	2.1139e-05
PRDX6	2.10779e-05
AIP	2.09455e-05
ENSSSCG00000001097	2.03859e-05
EIF3E	2.03052e-05
NUDT21	2.02211e-05
FLT3LG	2.02105e-05
HDAC2	2.0163e-05
ENSSSCG00000005518	2.01492e-05
LAMTOR4	2.01181e-05
NDUFB4	2.01079e-05
SNU13	2.01076e-05
GM2A	2.0105e-05
YWHAQ	2.00311e-05
MRPL38	2.00142e-05
ENSSSCG00000036483	1.99495e-05
CKB	1.99058e-05
ENSSSCG00000004082	1.98892e-05
EMD	1.98473e-05
RAB8B	1.98351e-05
ETF1	1.98305e-05
VCL	1.98155e-05
ENSSSCG00000008183	1.97669e-05
ENSSSCG00000038963	1.97519e-05
ENSSSCG00000040396	1.97325e-05
ENSSSCG00000028695	1.97271e-05
LAMP2	1.97198e-05
TOX4	1.97073e-05
EPC1	1.97047e-05
CDK2AP2	1.9695e-05
MAP3K5	1.96896e-05
SNRNP25	1.96834e-05
RILPL2	1.96804e-05
SLC25A38	1.9676e-05
TOR4A	1.96758e-05
ENSSSCG00000004024	1.96677e-05
OGDH	1.96676e-05
WDR12	1.96614e-05
ZBTB41	1.96576e-05
MRPS26	1.96487e-05
KLHL15	1.96376e-05
ANKRD27	1.96361e-05
C2CD5	1.96314e-05
TRPS1	1.96288e-05
RAB6A	1.96254e-05
SPTSSA	1.96187e-05
PPP3CC	1.96131e-05
PFKP	1.95981e-05
GALNT6	1.95873e-05
LY6E	1.95853e-05
NT5C	1.95785e-05
WIPI2	1.95692e-05
BPGM	1.95676e-05
TAGAP	1.95668e-05
NAE1	1.95591e-05
ENSSSCG00000038359	1.95567e-05
SLAMF7	1.95531e-05
ENSSSCG00000040528	1.95515e-05
HIKESHI	1.95457e-05
LAMTOR1	1.95335e-05
ATF4	1.95295e-05
HLCS	1.95282e-05
FAM120A	1.95039e-05
ENSSSCG00000035650	1.94985e-05
LETM1	1.94979e-05
IMMT	1.94782e-05
ENSSSCG00000039551	1.94542e-05
RCSD1	1.94384e-05
MFF	1.94333e-05
CST7	1.94302e-05
SYNCRIP	1.94228e-05
TRNT1	1.9418e-05
MRPL12	1.94176e-05
YIPF2	1.94021e-05
CAMK4	1.93877e-05
ENSSSCG00000003520	1.9385e-05
RTCB	1.93353e-05
ENSSSCG00000025151	1.92393e-05
TCP11L2	1.91906e-05
ENSSSCG00000003261	1.85694e-05
PDCD4	1.83925e-05
C12orf75	1.83836e-05
ENSSSCG00000002449	1.83765e-05
CRTAM	1.82156e-05
RPL7L1	1.81961e-05
ENSSSCG00000040801	1.79833e-05
SEC63	1.79808e-05
INO80E	1.79555e-05
NUCB1	1.79453e-05
UBE2A	1.79257e-05
EXOSC5	1.79228e-05
FXR1	1.79198e-05
OAZ2	1.7904e-05
IARS	1.78958e-05
SEC11A	1.78841e-05
ENSSSCG00000009128	1.7882e-05
MRPS23	1.78815e-05
C6orf62	1.78814e-05
C21orf91	1.78748e-05
PARVG	1.78675e-05
SNW1	1.78642e-05
RBPJ	1.7864e-05
PTPRC	1.78559e-05
PPP2R5A	1.78438e-05
RAE1	1.78432e-05
CCR2	1.78412e-05
CCNI	1.78366e-05
PARK7	1.78359e-05
NECAP2	1.78333e-05
RAB2A	1.78321e-05
INO80C	1.78271e-05
MEPCE	1.78213e-05
OTUB1	1.78169e-05
TIMM8B	1.78159e-05
SPAG8	1.78109e-05
ENSSSCG00000007322	1.77963e-05
PBX2	1.77932e-05
SRSF7	1.77895e-05
ARID5A	1.77809e-05
G6PD	1.77784e-05
PDS5A	1.77716e-05
CARD19	1.77675e-05
RNF139	1.77619e-05
AMZ2	1.77585e-05
KEAP1	1.77574e-05
GAPVD1	1.77546e-05
CHCHD5	1.77509e-05
LYSMD2	1.7749e-05
ENSSSCG00000036524	1.77428e-05
TSR3	1.77399e-05
ENSSSCG00000011329	1.77359e-05
RBMX	1.77315e-05
SOS1	1.77214e-05
ARFGEF2	1.77148e-05
BDH1	1.77137e-05
FARSA	1.77068e-05
ENSSSCG00000033703	1.77041e-05
ZCCHC2	1.76974e-05
NDFIP2	1.76967e-05
TBC1D17	1.76753e-05
CENPH	1.76687e-05
TSFM	1.76602e-05
NELFB	1.76587e-05
ATL3	1.76584e-05
S100A1	1.76577e-05
ZC3H13	1.76533e-05
FBXO32	1.76441e-05
ENSSSCG00000038825	1.76413e-05
COPZ1	1.7639e-05
ENSSSCG00000002996	1.76329e-05
LYRM1	1.76256e-05
RABGEF1	1.76192e-05
RPF2	1.76144e-05
ENSSSCG00000023126	1.76104e-05
ENSSSCG00000016886	1.76001e-05
MRPL40	1.75972e-05
NPTN	1.75971e-05
PIK3R1	1.75907e-05
RIT1	1.75899e-05
ENSSSCG00000000148	1.75855e-05
KPNA6	1.75848e-05
ENSSSCG00000006682	1.75808e-05
TPM2	1.75624e-05
SMC6	1.75556e-05
EFR3A	1.75448e-05
CD8B	1.75345e-05
UBE2V2	1.75287e-05
IPO13	1.75111e-05
SMARCD1	1.74865e-05
ENSSSCG00000031594	1.74859e-05
UQCRC1	1.74776e-05
ENSSSCG00000035209	1.7466e-05
EDF1	1.7458e-05
ZFP2	1.74555e-05
ENSSSCG00000011237	1.74541e-05
RBBP7	1.74516e-05
NUDCD3	1.74428e-05
NFKBIA	1.74382e-05
TAF7	1.74266e-05
NDUFV3	1.74239e-05
DDX60	1.74142e-05
CD84	1.74019e-05
ACOT13	1.73631e-05
ICOS	1.73487e-05
MISP3	1.73341e-05
FAM102A	1.73122e-05
RNF19A	1.73066e-05
UQCC2	1.72427e-05
FUS	1.72397e-05
TMC6	1.7235e-05
CALR	1.72334e-05
ENSSSCG00000013366	1.71278e-05
RTF1	1.70297e-05
HYPK	1.67235e-05
ENSSSCG00000007355	1.62566e-05
C12orf10	1.6253e-05
SERBP1	1.61948e-05
SPG21	1.61332e-05
ENSSSCG00000023331	1.61217e-05
P2RY10	1.6038e-05
ELL	1.60233e-05
IBA57	1.60066e-05
NAT9	1.59913e-05
ARRB2	1.59748e-05
PPP2R1B	1.59639e-05
LENG8	1.59629e-05
ARCN1	1.5957e-05
C18orf32	1.59489e-05
WASHC5	1.59476e-05
TAOK3	1.58997e-05
RASSF3	1.58984e-05
LNPK	1.58943e-05
WDR18	1.58805e-05
KHNYN	1.58783e-05
LMF1	1.58756e-05
PDCD6	1.58716e-05
RHOG	1.58703e-05
KDSR	1.58644e-05
WRAP73	1.58562e-05
EIF1AD	1.58545e-05
BRD3	1.58501e-05
ARRDC3	1.58492e-05
CPNE1	1.58474e-05
ABHD17B	1.58436e-05
ATP5F1A	1.58415e-05
ENSSSCG00000014850	1.58407e-05
MTMR6	1.5839e-05
RAB22A	1.58366e-05
MRPL20	1.58244e-05
CHST10	1.58233e-05
ENSSSCG00000003236	1.58201e-05
NIPSNAP3B	1.58172e-05
CXCR4	1.58122e-05
ENSSSCG00000010320	1.58091e-05
CSNK1G3	1.58073e-05
GNA13	1.58066e-05
GTF2H1	1.58017e-05
SERTAD1	1.58014e-05
DIPK1A	1.57968e-05
ENSSSCG00000032747	1.57928e-05
BTBD11	1.57911e-05
PTP4A1	1.5786e-05
CFAP54	1.57848e-05
PRMT5	1.57835e-05
HBP1	1.578e-05
ENSSSCG00000037299	1.57799e-05
STK17B	1.5775e-05
GNLY	1.57746e-05
ANKRD54	1.57743e-05
TNIK	1.57709e-05
AGPS	1.57553e-05
NAA20	1.57541e-05
FHL3	1.57479e-05
ATOX1	1.57461e-05
TFDP2	1.5745e-05
NOC3L	1.5745e-05
KDELR2	1.57432e-05
AHDC1	1.57414e-05
ENSSSCG00000004349	1.57397e-05
BECN1	1.57368e-05
CSTF1	1.57325e-05
C1orf43	1.57313e-05
FKBP11	1.57275e-05
CYBC1	1.57201e-05
TMBIM1	1.5716e-05
GPI	1.57104e-05
CDK2AP1	1.57083e-05
TRIM37	1.57073e-05
AKAP8L	1.57071e-05
MRPL54	1.57059e-05
IL10	1.57018e-05
ALDH16A1	1.56994e-05
RAB29	1.56968e-05
CLASP1	1.56954e-05
ENSSSCG00000014013	1.56925e-05
CCDC9	1.56835e-05
ESYT2	1.56811e-05
DPP3	1.5681e-05
NRAS	1.56756e-05
ZNF330	1.56722e-05
FAM78A	1.56687e-05
RBSN	1.56676e-05
CCDC146	1.56495e-05
RRP9	1.56375e-05
PPP2R1A	1.56355e-05
CASC1	1.56354e-05
BOD1L1	1.56353e-05
ILKAP	1.56284e-05
RFWD3	1.56274e-05
UBE2G2	1.5627e-05
CNDP2	1.56227e-05
PSMC2	1.56161e-05
STX12	1.56154e-05
DAAM1	1.55986e-05
GRHPR	1.55976e-05
ANGPTL1	1.55937e-05
CRLF3	1.55797e-05
ZNRD2	1.55662e-05
PRPF4	1.55536e-05
C7orf50	1.55517e-05
TRAF6	1.55421e-05
CSNK1G2	1.55417e-05
IFIT2	1.55341e-05
CD47	1.55271e-05
PPBP	1.5523e-05
FAM53B	1.5522e-05
NLE1	1.5521e-05
ENSSSCG00000023595	1.55183e-05
ENSSSCG00000009792	1.55086e-05
CCDC25	1.55029e-05
ENSSSCG00000007203	1.54959e-05
TBC1D20	1.54881e-05
NMT1	1.54751e-05
ARMC1	1.54513e-05
SMARCC1	1.54512e-05
STOML2	1.54476e-05
PLSCR1	1.5429e-05
PRKCB	1.54219e-05
C5orf15	1.53946e-05
ENSSSCG00000038708	1.53814e-05
SAP18	1.53803e-05
TM7SF3	1.53647e-05
TBC1D10C	1.53442e-05
CPD	1.53128e-05
ENSSSCG00000009934	1.52661e-05
SAMM50	1.52296e-05
PLP2	1.51779e-05
ITGB2	1.5129e-05
SAFB	1.45385e-05
ANAPC13	1.43462e-05
RMDN1	1.42501e-05
SYF2	1.425e-05
PHTF2	1.42349e-05
RRAGC	1.42005e-05
CINP	1.4188e-05
CNOT7	1.4165e-05
EIF4E	1.41568e-05
RPIA	1.41546e-05
RAB35	1.41542e-05
COPS3	1.41117e-05
ATP6V1F	1.41079e-05
CD6	1.41012e-05
ENSSSCG00000020777	1.4088e-05
TWISTNB	1.4049e-05
RGS1	1.40489e-05
GORASP2	1.39931e-05
MRPS9	1.39909e-05
TPST2	1.39904e-05
CCSAP	1.3986e-05
OTUD6B	1.39759e-05
ENSSSCG00000014343	1.39698e-05
FAM83A	1.39634e-05
ARL14EP	1.39565e-05
ISG20L2	1.3943e-05
NPC2	1.3934e-05
ENSSSCG00000032903	1.39321e-05
MLLT3	1.39295e-05
JCHAIN	1.39245e-05
ABHD17A	1.39238e-05
ENSSSCG00000022906	1.39229e-05
ENSSSCG00000038757	1.39134e-05
MRPS5	1.39066e-05
EIF4EBP2	1.3906e-05
ENSSSCG00000021322	1.39031e-05
PAK2	1.38957e-05
BCCIP	1.38881e-05
MYCBP2	1.38826e-05
EP300	1.38806e-05
ST3GAL1	1.38804e-05
NEMF	1.3876e-05
IL10RA	1.38735e-05
ARID2	1.38723e-05
NRP1	1.38715e-05
HERC4	1.38656e-05
PPID	1.38615e-05
MAP3K7	1.38596e-05
CRTC2	1.38596e-05
UBE2Z	1.38577e-05
TLK2	1.38572e-05
RFC2	1.3854e-05
XAB2	1.38519e-05
MON1B	1.38477e-05
WDR61	1.38463e-05
HM13	1.38457e-05
CAPRIN1	1.38441e-05
COMMD3	1.38209e-05
DAGLB	1.3819e-05
PQLC2	1.38111e-05
ENSSSCG00000001927	1.38086e-05
ENSSSCG00000014165	1.38079e-05
USF1	1.38065e-05
SLC50A1	1.38033e-05
ENSSSCG00000013318	1.38004e-05
ADRM1	1.37971e-05
IFI35	1.37879e-05
TOX	1.37872e-05
EXOC7	1.37862e-05
MPP1	1.37843e-05
ENSSSCG00000040857	1.37802e-05
LAMTOR2	1.37742e-05
GADD45GIP1	1.37737e-05
XPA	1.37716e-05
CCDC28A	1.3763e-05
GTF2H3	1.37629e-05
ATP2B4	1.37589e-05
ENSSSCG00000002743	1.37549e-05
ABCD3	1.37539e-05
APMAP	1.37517e-05
TTC17	1.37514e-05
ENSSSCG00000017868	1.37491e-05
RTN4	1.37491e-05
NAGLU	1.3746e-05
TCOF1	1.37459e-05
CREM	1.37436e-05
TRIM25	1.37414e-05
SLC22A17	1.37363e-05
RITA1	1.37321e-05
PLAGL2	1.37314e-05
ZAP70	1.37309e-05
WARS	1.3727e-05
IAH1	1.37264e-05
C3orf38	1.37231e-05
IKZF5	1.37221e-05
EIF1AY	1.37091e-05
KCMF1	1.3707e-05
SMARCA4	1.37063e-05
RPS6KA4	1.37044e-05
PIGP	1.37043e-05
SOCS4	1.37022e-05
TTF2	1.37016e-05
MUS81	1.37002e-05
ORAI1	1.36997e-05
ANXA11	1.36921e-05
CCT7	1.36869e-05
USP25	1.36842e-05
GGPS1	1.36816e-05
PIAS1	1.36814e-05
SNRNP35	1.36813e-05
APH1A	1.36801e-05
UBE2G1	1.36747e-05
UBL3	1.36744e-05
PTPN7	1.36729e-05
PPP4R3A	1.36726e-05
ABHD13	1.36724e-05
ENSSSCG00000011493	1.36572e-05
VSIR	1.36528e-05
TLK1	1.36494e-05
IK	1.36456e-05
ENSSSCG00000031818	1.36456e-05
PLGRKT	1.36439e-05
FMO4	1.36422e-05
LARS	1.36374e-05
SNX27	1.36374e-05
SKA2	1.36355e-05
ST6GALNAC2	1.36354e-05
NDUFAF4	1.36343e-05
HSD17B12	1.36337e-05
HECTD4	1.36323e-05
ATP6V1C1	1.36305e-05
ARMC10	1.36299e-05
EDC3	1.3629e-05
CCDC127	1.3628e-05
DNAJA2	1.36141e-05
TM9SF3	1.36139e-05
CCND2	1.36131e-05
COMMD6	1.36107e-05
SEMA4D	1.3609e-05
MRPS35	1.36085e-05
PRKCSH	1.3591e-05
TOB2	1.35837e-05
RNF214	1.35787e-05
CAMLG	1.3577e-05
RSF1	1.35744e-05
ZNF148	1.3556e-05
ENSSSCG00000013715	1.35522e-05
ENSSSCG00000037566	1.35512e-05
TMEM43	1.35412e-05
ERI3	1.354e-05
NOSIP	1.35349e-05
CPSF7	1.35236e-05
USF2	1.3516e-05
PIGM	1.35141e-05
NUBP2	1.35106e-05
STRN3	1.34972e-05
CDC14A	1.34903e-05
ZNRF1	1.34867e-05
MCC	1.34767e-05
ENSSSCG00000017165	1.34764e-05
ALDOC	1.34673e-05
PSPC1	1.34623e-05
AKR1B1	1.34557e-05
SDF2L1	1.34489e-05
ENSSSCG00000015664	1.34488e-05
NUDT16L1	1.34259e-05
PRRC2B	1.33985e-05
SPPL2A	1.3398e-05
TALDO1	1.33867e-05
AHR	1.33801e-05
ENSSSCG00000027840	1.33357e-05
PIP4K2A	1.32643e-05
ST6GAL1	1.32615e-05
CNBP	1.32411e-05
ITGB7	1.32276e-05
PAFAH1B1	1.31591e-05
PTTG1IP	1.30061e-05
RGS19	1.26848e-05
COMMD5	1.26243e-05
NOP56	1.25392e-05
LRCH4	1.2461e-05
MTERF3	1.24366e-05
ENSSSCG00000006260	1.24087e-05
LBR	1.227e-05
HNRNPD	1.22403e-05
RCHY1	1.22326e-05
ENSSSCG00000016970	1.2145e-05
DDX42	1.21368e-05
FAXDC2	1.21223e-05
ARNTL	1.21222e-05
PSMC1	1.21189e-05
SUN2	1.21098e-05
YIPF1	1.20965e-05
THOC2	1.20954e-05
SAE1	1.20772e-05
CLINT1	1.20685e-05
ASNA1	1.2057e-05
NRBP1	1.20426e-05
CIAO2B	1.20408e-05
CYTH2	1.20373e-05
BAX	1.20151e-05
ZYX	1.20146e-05
GPS1	1.20056e-05
STXBP3	1.20039e-05
TNKS	1.19978e-05
DNAJC8	1.19973e-05
PECR	1.19963e-05
TAF1B	1.19809e-05
ZNF131	1.19764e-05
SMAP1	1.19741e-05
ZMYM1	1.1958e-05
USP4	1.1957e-05
SENP7	1.19535e-05
MORF4L1	1.19532e-05
AEBP2	1.195e-05
HDGFL2	1.19446e-05
2021-09-11	1.19435e-05
MED13	1.19321e-05
SPIN3	1.19273e-05
BPTF	1.19206e-05
THAP5	1.19199e-05
ENSSSCG00000026488	1.19185e-05
FAM222B	1.19181e-05
CHIC2	1.19145e-05
NCOA4	1.19072e-05
PTK2B	1.19037e-05
CAST	1.19032e-05
PABPN1	1.1902e-05
DXO	1.18968e-05
LASP1	1.18963e-05
ENSSSCG00000036083	1.18935e-05
FECH	1.18933e-05
VAMP4	1.18895e-05
MID1IP1	1.18875e-05
ENSSSCG00000023584	1.18842e-05
MYH9	1.18816e-05
ENSSSCG00000038067	1.18813e-05
DPP9	1.18791e-05
KIF5B	1.18783e-05
NCK2	1.18762e-05
USP10	1.18745e-05
PHF5A	1.18744e-05
ENSSSCG00000028794	1.18735e-05
IFIT5	1.18732e-05
DERL1	1.18706e-05
ST3GAL5	1.1868e-05
CCDC59	1.18678e-05
MTHFR	1.18671e-05
CFAP36	1.18667e-05
DNAJC3	1.18662e-05
RNPEPL1	1.1866e-05
GMEB1	1.18653e-05
GBA	1.18627e-05
MRPS34	1.18619e-05
TMEM167B	1.18615e-05
CEP63	1.18598e-05
SNRNP27	1.1859e-05
TK2	1.18578e-05
COG6	1.18577e-05
SPOP	1.18494e-05
ENSSSCG00000032216	1.18452e-05
EXOSC8	1.18449e-05
GCH1	1.18431e-05
KAT8	1.18424e-05
TUFM	1.18419e-05
ATAD2B	1.18354e-05
SEC31A	1.18334e-05
SLC25A17	1.18312e-05
LRRC28	1.18312e-05
ANKRD37	1.18311e-05
GSTA4	1.18309e-05
KIDINS220	1.18302e-05
RFNG	1.18286e-05
RAB31	1.18255e-05
APPL1	1.18237e-05
GAN	1.18182e-05
TUBB4B	1.18175e-05
GCNT4	1.18171e-05
TRABD	1.1815e-05
USP39	1.18137e-05
LFNG	1.18122e-05
PPP1R12A	1.18074e-05
ENSSSCG00000016096	1.18074e-05
ARHGAP27	1.18011e-05
MED25	1.18e-05
RRP1	1.17998e-05
DRAM2	1.17985e-05
FBXO6	1.17934e-05
RCAN2	1.179e-05
CYP4V2	1.17883e-05
LTO1	1.17857e-05
MORF4L2	1.17845e-05
SLC25A25	1.17833e-05
MTG1	1.17779e-05
ALAS1	1.17769e-05
FBXO30	1.17715e-05
TATDN1	1.17712e-05
KPTN	1.17707e-05
TMEM222	1.17689e-05
VAMP7	1.17685e-05
DPY19L4	1.17649e-05
MBTD1	1.17631e-05
FYCO1	1.17628e-05
PPP1R11	1.17554e-05
PGAP2	1.17497e-05
MAPK1	1.17474e-05
AASDH	1.1746e-05
SDHD	1.17438e-05
GTF2H5	1.17437e-05
AFTPH	1.17428e-05
ZNF317	1.174e-05
METTL27	1.1735e-05
GLS	1.17331e-05
ENSSSCG00000011064	1.17322e-05
ELF1	1.17318e-05
RBM4	1.17301e-05
GPR18	1.17191e-05
BCL9L	1.17111e-05
MIF	1.17085e-05
SLC35C2	1.17025e-05
ASF1A	1.16995e-05
S100PBP	1.1698e-05
PBRM1	1.16967e-05
KNSTRN	1.16944e-05
GGNBP2	1.1694e-05
USP18	1.16922e-05
ZMAT3	1.16808e-05
NPAT	1.16765e-05
CKS1B	1.16718e-05
ENSSSCG00000002898	1.16716e-05
METAP2	1.167e-05
RGS2	1.16693e-05
ENSSSCG00000016323	1.16683e-05
ILK	1.16681e-05
RABAC1	1.16663e-05
ENSSSCG00000023323	1.16629e-05
ERMP1	1.16568e-05
PGGHG	1.16565e-05
CDC37	1.16549e-05
PCOLCE	1.16547e-05
ENSSSCG00000028097	1.1654e-05
EIF6	1.16487e-05
SCYL2	1.16454e-05
TAF2	1.16452e-05
C12orf73	1.16403e-05
RFXANK	1.16392e-05
ITGB1BP1	1.16387e-05
NOB1	1.16371e-05
SDCCAG8	1.16331e-05
PTPN1	1.16303e-05
FAM120B	1.16298e-05
ELOF1	1.16277e-05
ERP44	1.16233e-05
ENSSSCG00000021200	1.16209e-05
USP47	1.16208e-05
CPSF1	1.16168e-05
ENSSSCG00000021380	1.16147e-05
SLC39A6	1.16107e-05
ENSSSCG00000011917	1.16061e-05
ADGRG5	1.16019e-05
PPP2R5C	1.15989e-05
RANBP10	1.15961e-05
TGIF2.RAB5IF	1.15948e-05
TELO2	1.15922e-05
EIF3I	1.15875e-05
EMC8	1.15645e-05
HNRNPC	1.15547e-05
GOLGB1	1.15525e-05
MOB1A	1.15498e-05
DCAF1	1.15486e-05
SFSWAP	1.1547e-05
SDHB	1.15467e-05
LAT	1.15464e-05
MBD2	1.15447e-05
CD5	1.15239e-05
LRRC45	1.15181e-05
HADHB	1.15174e-05
PIN1	1.15012e-05
PSAP	1.14946e-05
PDCD5	1.14866e-05
TCF25	1.14844e-05
ENSSSCG00000027778	1.14567e-05
SRSF9	1.14561e-05
ENSSSCG00000032060	1.14392e-05
UBP1	1.14251e-05
ENSSSCG00000000663	1.1409e-05
CCM2	1.14051e-05
WARS2	1.13858e-05
ERO1A	1.13611e-05
GGACT	1.13584e-05
YLPM1	1.13413e-05
ENSSSCG00000016711	1.13334e-05
RPSA	1.12822e-05
LEPROTL1	1.11947e-05
HSP90AB1	1.11362e-05
SNX3	1.10772e-05
EIF3H	1.09234e-05
DDX6	1.08475e-05
ENSSSCG00000001414	1.05295e-05
RASGRP1	1.04024e-05
SP110	1.03766e-05
ENSSSCG00000001398	1.03595e-05
ARMCX3	1.03197e-05
CD2	1.02954e-05
ENSSSCG00000034072	1.02909e-05
PGK1	1.02823e-05
SMG1	1.02784e-05
CREB1	1.02553e-05
TMEM147	1.02461e-05
ENSSSCG00000024313	1.02401e-05
PDK3	1.02089e-05
ENSSSCG00000001075	1.02067e-05
CYTH1	1.01608e-05
CTDSP1	1.01509e-05
CUL4A	1.01366e-05
ACOX1	1.01311e-05
RBM42	1.0124e-05
HDLBP	1.01129e-05
RNF166	1.01059e-05
ARFGAP1	1.00841e-05
PSMD6	1.00689e-05
TIMM17B	1.00626e-05
ENSSSCG00000016376	1.00494e-05
GFPT1	1.00461e-05
NARF	1.00418e-05
ENSSSCG00000010734	1.00402e-05
CCR3	1.00376e-05
RNF14	1.00343e-05
ITSN2	1.00257e-05
KPNA2	1.00192e-05
SUCLG2	1.00101e-05
HMGN4	1.00094e-05
ADH5	1.00046e-05
DKC1	1.00042e-05
ENSSSCG00000001934	1.00035e-05
TFIP11	9.9967e-06
PPP4R2	9.98643e-06
ZNF512B	9.98321e-06
MFSD11	9.97851e-06
FYTTD1	9.97825e-06
WDFY2	9.9761e-06
ENSSSCG00000006694	9.97475e-06
PCID2	9.97172e-06
TTC14	9.96988e-06
NFYB	9.96844e-06
CCDC115	9.96669e-06
EIF4G1	9.96211e-06
C1orf74	9.96204e-06
FOS	9.95657e-06
GCC1	9.95543e-06
JAK3	9.95205e-06
DNAJC1	9.9519e-06
ENSSSCG00000009241	9.9508e-06
PSMB10	9.95004e-06
ENSSSCG00000002550	9.94902e-06
ENSSSCG00000034540	9.94746e-06
TXNDC11	9.94285e-06
MTFMT	9.94169e-06
ATG4B	9.94045e-06
HSD17B8	9.9396e-06
MRPS18C	9.93886e-06
USP1	9.93365e-06
AP1M1	9.93055e-06
CDC42SE2	9.92769e-06
CRIPT	9.92621e-06
C19orf12	9.92344e-06
MLLT6	9.92297e-06
CXorf56	9.92265e-06
CDKN2AIP	9.9159e-06
PDCD10	9.91549e-06
RNF138	9.91227e-06
NADK2	9.91113e-06
OPTN	9.91017e-06
AP2B1	9.90629e-06
GIGYF2	9.90453e-06
RPAP3	9.90219e-06
RAD17	9.90097e-06
SPECC1	9.90071e-06
PREB	9.89853e-06
TNPO3	9.89769e-06
HSBP1	9.89533e-06
NELFCD	9.89506e-06
CCDC50	9.89409e-06
SGF29	9.89363e-06
ZNF414	9.89188e-06
ENSSSCG00000027718	9.89184e-06
CUL1	9.88783e-06
ANXA5	9.88658e-06
TSC22D3	9.88579e-06
ENSSSCG00000008274	9.88442e-06
PNPLA6	9.88307e-06
ENSSSCG00000027905	9.8824e-06
EVI2B	9.88107e-06
MFSD1	9.88076e-06
LYRM2	9.88019e-06
POLR2H	9.87384e-06
ENSSSCG00000038249	9.87364e-06
RAB19	9.87315e-06
DYM	9.87266e-06
LITAF	9.87199e-06
SLC25A40	9.86805e-06
NDUFV1	9.86796e-06
OXA1L	9.86556e-06
ZBTB20	9.86513e-06
WTAP	9.86462e-06
TADA1	9.86427e-06
MMP25	9.86361e-06
UBE2D1	9.86344e-06
ENSSSCG00000034129	9.8624e-06
ENSSSCG00000039618	9.86237e-06
CDC37L1	9.85776e-06
ENSSSCG00000012886	9.85636e-06
OSBPL1A	9.85433e-06
CHD8	9.8512e-06
TMEM131	9.8489e-06
SORL1	9.8471e-06
U2AF2	9.84599e-06
B4GALT1	9.84543e-06
CYBRD1	9.8419e-06
TMEM164	9.84169e-06
RUBCNL	9.83905e-06
WDR89	9.8353e-06
CHMP2B	9.83354e-06
PTPRA	9.83346e-06
ADCY3	9.83166e-06
IKZF1	9.83001e-06
TP53INP1	9.82876e-06
TNRC6A	9.82863e-06
GALNT2	9.82354e-06
ENSSSCG00000032984	9.82352e-06
TMED3	9.82327e-06
ENSSSCG00000039830	9.82318e-06
ENSSSCG00000003849	9.8215e-06
ARHGEF6	9.82146e-06
SINHCAF	9.82031e-06
ENSSSCG00000026446	9.82024e-06
CCDC186	9.8165e-06
IRAK4	9.81574e-06
TMX3	9.81503e-06
ENSSSCG00000003885	9.81496e-06
UBAP1	9.81438e-06
UBE4A	9.81339e-06
NEK9	9.81331e-06
THOC1	9.80709e-06
RPA1	9.80553e-06
TMEM243	9.80441e-06
MED31	9.80292e-06
TMEM42	9.80224e-06
TIMM44	9.80054e-06
SEMA4A	9.79914e-06
TNFAIP8L2	9.79913e-06
IFT46	9.7945e-06
RLF	9.79436e-06
ARSA	9.79432e-06
ENSSSCG00000017038	9.79408e-06
EMC3	9.79264e-06
MOCS1	9.79048e-06
RYBP	9.78983e-06
ACP1	9.78931e-06
IFI44	9.78905e-06
ENSSSCG00000011077	9.78873e-06
ENSSSCG00000032067	9.78779e-06
ENSSSCG00000037431	9.78699e-06
ENSSSCG00000014258	9.77885e-06
GALE	9.77827e-06
ASRGL1	9.774e-06
PWWP3A	9.77351e-06
G3BP2	9.77349e-06
TAB2	9.77114e-06
ARID3A	9.77021e-06
CLK4	9.76813e-06
EHMT1	9.76468e-06
BET1L	9.76436e-06
GPR171	9.76174e-06
RPA2	9.75918e-06
GHDC	9.75714e-06
SELENOS	9.75436e-06
SNX12	9.75382e-06
DAPK2	9.75364e-06
ENSSSCG00000037995	9.75114e-06
FOLR1	9.75047e-06
ENSSSCG00000029066	9.74707e-06
TCF3	9.74597e-06
C16orf91	9.74294e-06
KDM5B	9.7429e-06
ENSSSCG00000038141	9.74287e-06
STUB1	9.74221e-06
UBAC2	9.73967e-06
FUCA2	9.73583e-06
YAF2	9.73486e-06
NRDE2	9.73123e-06
NFATC2IP	9.72975e-06
IFNGR2	9.72833e-06
KRR1	9.72633e-06
ATP5ME	9.72545e-06
NMRAL1	9.72472e-06
DCTN5	9.7246e-06
RPP30	9.72245e-06
MDM2	9.71991e-06
PSMD11	9.71967e-06
UBXN6	9.71527e-06
INSIG1	9.71185e-06
FRYL	9.70982e-06
ARHGAP17	9.70901e-06
ZNF32	9.70874e-06
SLC37A3	9.70744e-06
NDRG2	9.69982e-06
BRD9	9.69122e-06
FUNDC2	9.68981e-06
FAF1	9.68066e-06
HK3	9.67341e-06
PLEKHA2	9.67049e-06
ERCC1	9.66961e-06
ENSSSCG00000033089	9.66924e-06
CNOT11	9.66809e-06
RRN3	9.66515e-06
ENSSSCG00000006179	9.66373e-06
CSKMT	9.66099e-06
NAPRT	9.65751e-06
TFG	9.64934e-06
MNAT1	9.63381e-06
FCER1A	9.6332e-06
GPR34	9.63318e-06
ENTPD6	9.62936e-06
RAB21	9.62881e-06
ENSSSCG00000003664	9.62323e-06
DGCR8	9.62166e-06
RARG	9.61374e-06
SMIM26	9.60702e-06
VPS16	9.60543e-06
TPP2	9.60074e-06
CCDC174	9.59954e-06
SRFBP1	9.59784e-06
ZC3H12D	9.58838e-06
MOBKL3	9.5743e-06
NCSTN	9.56201e-06
ENSSSCG00000038900	9.56077e-06
MKRN1	9.55959e-06
CMAS	9.55542e-06
TARS	9.51957e-06
OGFRL1	9.48447e-06
AIMP1	9.46717e-06
CTR9	9.45917e-06
EIF4A1	9.4475e-06
KATNA1	9.44007e-06
NIPBL	9.42821e-06
TNFSF14	9.4116e-06
CD4	9.3529e-06
CACYBP	9.26798e-06
ENSSSCG00000011234	9.05913e-06
FAM32A	8.75156e-06
NSD3	8.61573e-06
EMG1	8.44996e-06
COX7A2L	8.40476e-06
CSNK1A1	8.38176e-06
ENSSSCG00000037054	8.33452e-06
ENSSSCG00000029830	8.2907e-06
ILF2	8.26918e-06
CTU2	8.26593e-06
EI24	8.26239e-06
IRF5	8.22136e-06
HOMER2	8.17718e-06
SRSF4	8.17503e-06
ATF1	8.1713e-06
CCR4	8.1705e-06
ENSSSCG00000010301	8.16941e-06
PRDX4	8.15813e-06
ERGIC2	8.15221e-06
SS18L2	8.13975e-06
ENSSSCG00000016902	8.13875e-06
POGLUT1	8.13093e-06
ENSSSCG00000014387	8.13021e-06
HELQ	8.1299e-06
PRPF39	8.12284e-06
C6orf120	8.11367e-06
SSR1	8.10608e-06
SMG6	8.08898e-06
NCALD	8.08577e-06
CYC1	8.08459e-06
ENSSSCG00000022176	8.07744e-06
DYNLL1	8.074e-06
CERS2	8.07083e-06
ZMYND11	8.06598e-06
PGAM5	8.06203e-06
TMEM141	8.06133e-06
BMPR2	8.05901e-06
ENSSSCG00000025060	8.05754e-06
ENSSSCG00000039085	8.05439e-06
HCLS1	8.05388e-06
VTI1A	8.05085e-06
SCRN3	8.05057e-06
ENSSSCG00000014075	8.0474e-06
BPNT1	8.04696e-06
PHAX	8.04694e-06
TNIP1	8.04681e-06
CCT4	8.04499e-06
PTGR1	8.03894e-06
AHCYL1	8.03431e-06
SF3B2	8.03172e-06
ABHD12	8.0287e-06
HSPA14	8.02703e-06
TRMT61A	8.02407e-06
CSRP1	8.02315e-06
ENSSSCG00000031855	8.02129e-06
HMG20A	8.01309e-06
ARFIP2	8.01221e-06
CDC16	8.00795e-06
ENSSSCG00000031774	8.00762e-06
MRPL34	8.00735e-06
RIF1	8.00726e-06
DHRS13	8.00542e-06
MAPK6	8.00289e-06
ARL5A	8.00049e-06
TDG	7.997e-06
HDHD2	7.99676e-06
SLC30A5	7.99623e-06
ENSSSCG00000035738	7.99578e-06
SRP19	7.98793e-06
CHEK2	7.98772e-06
TAF11	7.98677e-06
PEX19	7.98668e-06
ARHGAP4	7.98648e-06
BSCL2	7.98408e-06
CNPPD1	7.98258e-06
ENSSSCG00000020710	7.98135e-06
ADCK2	7.97825e-06
NAPSA	7.97779e-06
SEC24D	7.97749e-06
NFYC	7.97545e-06
GCLC	7.97451e-06
CCT8	7.97221e-06
LMOD3	7.9722e-06
ZBTB18	7.97135e-06
SWT1	7.97077e-06
AIDA	7.97032e-06
CLTB	7.96807e-06
SCFD1	7.96757e-06
ZC3H15	7.96642e-06
ENSSSCG00000036247	7.96336e-06
BRIX1	7.9573e-06
COASY	7.9571e-06
SRRT	7.95635e-06
DPYSL2	7.95378e-06
STARD3NL	7.95279e-06
RBL1	7.95202e-06
CHCHD4	7.95187e-06
MAP1LC3B	7.95187e-06
CCHCR1	7.95042e-06
CLSPN	7.94955e-06
CA5B	7.94691e-06
ACO2	7.94094e-06
RETREG2	7.9404e-06
PRR14	7.93984e-06
RFESD	7.93984e-06
HIST1H2AC	7.93904e-06
GLUL	7.93845e-06
DDX19B	7.93834e-06
EEF1AKMT1	7.93811e-06
ENSSSCG00000010214	7.9379e-06
ANKRD52	7.93637e-06
BCL2L1	7.93535e-06
ENSSSCG00000036257	7.93529e-06
MAP3K11	7.93241e-06
CNP	7.93091e-06
GMPR	7.93086e-06
VPS50	7.93078e-06
TSTD2	7.93069e-06
PAF1	7.93025e-06
CASP7	7.92778e-06
NUP43	7.92636e-06
ENSSSCG00000025631	7.92546e-06
AKAP10	7.92518e-06
ERLEC1	7.92346e-06
CBX5	7.92253e-06
ENSSSCG00000040942	7.92247e-06
SRSF11	7.9219e-06
MLF2	7.92172e-06
C12orf49	7.92088e-06
PYM1	7.91907e-06
MAF	7.91866e-06
ENSSSCG00000009673	7.91633e-06
PDPK1	7.91605e-06
CKAP5	7.91557e-06
FGL2	7.9113e-06
MARS	7.91104e-06
GPATCH3	7.90928e-06
SNX4	7.90736e-06
FAM185A	7.90665e-06
GXYLT1	7.90513e-06
NUBP1	7.90231e-06
ACAT2	7.90152e-06
ARHGAP18	7.89946e-06
MRTO4	7.89854e-06
ELP6	7.89786e-06
PHF12	7.89653e-06
GRIPAP1	7.89627e-06
PRMT2	7.89545e-06
LACTB	7.89516e-06
ESCO1	7.89304e-06
MRPS2	7.89282e-06
ENSSSCG00000035893	7.88955e-06
SSH2	7.88846e-06
TCIRG1	7.8883e-06
CST3	7.8878e-06
KLRK1	7.88763e-06
ENSSSCG00000014094	7.88697e-06
MBD4	7.88647e-06
DDRGK1	7.88562e-06
FMNL1	7.88511e-06
ENSSSCG00000006360	7.88462e-06
CYB561A3	7.88298e-06
CTPS1	7.88177e-06
WASHC1	7.88112e-06
ENSSSCG00000010517	7.88082e-06
GOLGA4	7.87826e-06
INPP5K	7.878e-06
NKAPD1	7.87796e-06
IMPAD1	7.87554e-06
MFSD10	7.87458e-06
HAUS1	7.87449e-06
ENSSSCG00000017670	7.87205e-06
RABGAP1	7.87167e-06
CAMK2G	7.86883e-06
FBXL3	7.86866e-06
CLSTN1	7.86769e-06
SLF2	7.86737e-06
NSMCE2	7.86627e-06
TMEM98	7.86611e-06
STIP1	7.86542e-06
ENSSSCG00000033787	7.86454e-06
KHSRP	7.86431e-06
AP5Z1	7.86418e-06
ENSSSCG00000008137	7.86365e-06
BCDIN3D	7.86254e-06
SERPINF1	7.86165e-06
DUSP3	7.86085e-06
DNAJC24	7.86052e-06
FAM217B	7.86024e-06
STX6	7.85975e-06
IRF8	7.85855e-06
TMEM179B	7.85488e-06
RHOT1	7.85468e-06
CYHR1	7.85307e-06
CLCN3	7.85268e-06
ENSSSCG00000000107	7.85103e-06
ENSSSCG00000040203	7.8499e-06
AKIP1	7.84899e-06
ENSSSCG00000012602	7.84779e-06
JADE1	7.84709e-06
ALDH4A1	7.84515e-06
ENSSSCG00000026449	7.84437e-06
B3GNT3	7.84384e-06
BACH1	7.84332e-06
CLUAP1	7.84284e-06
SAMD3	7.84125e-06
BRD1	7.83976e-06
TANGO2	7.83844e-06
CASC4	7.83774e-06
ARMH3	7.83773e-06
HACD2	7.83744e-06
IFNG	7.83739e-06
FAR1	7.83705e-06
DDX56	7.8364e-06
ABI1	7.83524e-06
TASP1	7.8341e-06
CBX6	7.83387e-06
AP1S1	7.83294e-06
GEMIN6	7.83189e-06
CHCHD6	7.83112e-06
ADK	7.83004e-06
TBL3	7.82991e-06
MRPL19	7.82984e-06
HUWE1	7.829e-06
MKNK1	7.82753e-06
ADPRH	7.82599e-06
SLC4A1AP	7.82586e-06
PLEKHO1	7.82581e-06
GALT	7.82445e-06
ENSSSCG00000032017	7.82372e-06
TRMO	7.8228e-06
RBM12	7.82163e-06
ENSSSCG00000020921	7.82125e-06
ENSSSCG00000013874	7.82068e-06
ENSSSCG00000013900	7.82062e-06
MED27	7.81937e-06
EDEM1	7.81862e-06
ZDHHC17	7.81783e-06
CARS2	7.81674e-06
RO60	7.81608e-06
GOLPH3L	7.81604e-06
TAF6	7.81589e-06
MRPL51	7.81531e-06
PPP2R5D	7.81397e-06
GCN1	7.81342e-06
STAMBP	7.8131e-06
VPS54	7.81224e-06
NFRKB	7.81219e-06
ENSSSCG00000008287	7.81208e-06
ZNHIT3	7.81176e-06
SCAMP3	7.81171e-06
SCYL3	7.81165e-06
HCFC1R1	7.81025e-06
SNRPA1	7.80938e-06
SPHK2	7.80848e-06
LIMK2	7.80759e-06
ENSSSCG00000008898	7.80731e-06
GPR137	7.80729e-06
ZBTB8OS	7.80613e-06
PPP4R1	7.8056e-06
CENPW	7.80553e-06
BYSL	7.80332e-06
TP53RK	7.80274e-06
SLC38A9	7.80271e-06
POC5	7.79977e-06
SRP54	7.79963e-06
STK35	7.79917e-06
RABEP2	7.79794e-06
FCGR1A	7.79529e-06
GABBR1	7.79392e-06
LDLR	7.79074e-06
ENSSSCG00000023643	7.78758e-06
LCLAT1	7.78634e-06
TMEM189	7.78588e-06
TRAFD1	7.78563e-06
PWP1	7.78552e-06
MALT1	7.78476e-06
KMT5C	7.78317e-06
METTL26	7.77964e-06
MRPS14	7.77952e-06
BUD13	7.77844e-06
BRI3BP	7.77836e-06
KLF12	7.77797e-06
PSMD14	7.77563e-06
ENSSSCG00000008677	7.77554e-06
ENSSSCG00000013435	7.77493e-06
ENSSSCG00000016441	7.7748e-06
DUSP6	7.77476e-06
CAMK2D	7.77345e-06
ENSSSCG00000028195	7.77219e-06
SLC41A1	7.77054e-06
[truncated: 12,388 more rows]

## Sheet: 3v28_Impurity
Supplementary File 11. Random forest pair-wise analyses of CD4+ αβ T-cell clusters. For each model represented below the porcine scRNA-seq cluster IDs compared are shown along with the parameters used and resulting OOB prediction error. Variable importance was assigned by measuring node impurity (Impurity) and using permutations (Permutation). Features that reduced error in predictive accuracy ar…
Gene	Impurity
HMGB2	13.6387
BIRC5	12.4691
HMGN2	12.2256
PCLAF	9.93406
TMSB10	8.07143
H2AFZ	7.63419
STMN1	7.00401
LMNB1	6.79777
DUT	6.25943
RPL37	5.6242
ACTG1	5.58445
ENSSSCG00000040273	5.32666
TPX2	5.31728
ENSSSCG00000009327	5.14842
CENPE	4.72015
CENPA	4.50736
SPC24	4.3155
ENSSSCG00000003042	4.28617
ENSSSCG00000016737	4.18818
FLNA	3.9461
RPS27	3.79024
ENSSSCG00000035209	3.76097
ENSSSCG00000034617	3.71449
RPL34	3.62105
RPS15	3.6004
RPL35	3.39571
FABP3	3.38195
DDX39A	3.21442
ENSSSCG00000026064	3.20472
CALM3	3.1758
CENPF	3.11855
MCM4	3.11394
CDC20	3.07041
ANXA2	2.90272
ENSSSCG00000026302	2.87206
ENSSSCG00000005453	2.86075
TUBA1B	2.82062
HIST1H2AB	2.819
RPL23	2.81813
GAPDH	2.78534
PTMA	2.67937
IFI30	2.64998
ENSSSCG00000031088	2.61566
ENSSSCG00000024776	2.61271
TK1	2.59645
MCM7	2.59318
ENSSSCG00000036350	2.47365
ENSSSCG00000017032	2.45243
ENSSSCG00000016903	2.45097
HSD11B1L	2.4499
ENSSSCG00000034448	2.37205
H2AFV	2.3714
ATP5MC3	2.32338
TPI1	2.298
BTG1	2.28571
RAN	2.23801
ENSSSCG00000031117	2.23716
ENSSSCG00000037142	2.14779
ENSSSCG00000038507	2.1255
ENSSSCG00000031741	2.09496
SNRPC	2.0891
NUF2	2.03544
ENSSSCG00000003914	2.03217
RPL11	2.01115
RFC4	1.97032
HIST1H2AG	1.94624
TUBB4B	1.94533
CBX5	1.90426
RPA3	1.89574
ENSSSCG00000035908	1.86958
COX8A	1.86544
C15orf48	1.85242
DLGAP5	1.80993
CLSPN	1.80146
RPS14	1.77303
ENSSSCG00000017239	1.67796
CD52	1.60127
ENSSSCG00000014031	1.53935
CDKN3	1.53233
ZBTB32	1.49935
PLAAT3	1.49406
CCNB1	1.48314
S100A10	1.48131
ENSSSCG00000003930	1.47684
MYBL2	1.46894
ENSSSCG00000032060	1.43662
COX7A2	1.43333
ENSSSCG00000035768	1.41446
BBS7	1.36273
MCM3	1.34936
SMC2	1.32982
ENSSSCG00000035080	1.32512
ENSSSCG00000040857	1.3144
ENSSSCG00000039544	1.25137
PIMREG	1.24038
ENSSSCG00000036296	1.21145
B2M	1.19858
BATF	1.17407
GON7	1.17373
LSM2	1.13473
CYTB	1.12802
SNRPD1	1.12352
POMP	1.11221
YWHAQ	1.11075
SNRPF	1.10654
LSM6	1.10514
ENSSSCG00000012961	1.10204
COX3	1.06248
UHRF1	1.05079
ENSSSCG00000027085	1.04938
CYB5B	1.04271
RPL10	1.0238
BST2	1.01433
ENSSSCG00000012119	1.00292
RPS16	0.994381
ENSSSCG00000039071	0.993034
GLIPR1	0.979907
ASF1B	0.966287
SNRPE	0.965603
TNFRSF1B	0.951852
ENSSSCG00000007088	0.93493
CDCA8	0.904153
NDUFS8	0.904016
CTLA4	0.900601
PCNA	0.897164
CENPW	0.892967
ISG20	0.891029
CENPS	0.887901
RPL7L1	0.879661
ACTB	0.848425
HMMR	0.841852
RPL9	0.827275
DNMT1	0.826859
CDT1	0.811309
TYMS	0.807097
ENSSSCG00000034913	0.797092
ENSSSCG00000012517	0.791035
CCDC167	0.788799
ENSSSCG00000025928	0.766988
ENSSSCG00000039582	0.762272
GINS2	0.76124
ENSSSCG00000011272	0.754907
DDX5	0.740069
ENSSSCG00000016711	0.738115
TUBB	0.72969
CCL5	0.727659
CYCS	0.719165
LTB	0.71769
ENSSSCG00000000405	0.695151
UCHL3	0.692731
RANBP1	0.688769
CENPM	0.684733
MCM2	0.681785
TPM4	0.672085
EZH2	0.663214
ENSSSCG00000006830	0.662086
NDUFB7	0.6601
UQCR10	0.655413
HNRNPD	0.653705
GLRX3	0.641613
EEF1B2	0.63933
CORO1A	0.639292
ILF2	0.632541
COX5B	0.625043
CFL1	0.61955
LAMTOR2	0.617031
TMEM71	0.615002
ENSSSCG00000014855	0.613369
CENPU	0.60875
YKT6	0.604591
UBE2C	0.59385
ENSSSCG00000017213	0.591193
LBR	0.584079
ARPC2	0.579475
PSMA4	0.574346
GZMK	0.560671
MCM5	0.55676
MTFR2	0.553452
E2F2	0.549967
NDUFA1	0.536024
NUCKS1	0.535079
ARPC5L	0.533114
PRPF19	0.52436
HINT1	0.52308
ENSSSCG00000015710	0.520478
CENPN	0.519296
RPS9	0.518508
S100A6	0.516236
ARHGDIA	0.515558
ARPC3	0.514069
DYNLL1	0.510926
TPM3	0.506275
MCM6	0.505587
ENSSSCG00000037869	0.498727
CKS2	0.497229
ATAD5	0.496402
NDUFA8	0.495022
NDUFV1	0.487448
ENSSSCG00000010954	0.487434
COX2	0.487227
TRAT1	0.486787
ENSSSCG00000008035	0.484069
ENSSSCG00000002907	0.479553
HDGF	0.478435
ENSSSCG00000001414	0.477547
CCNB2	0.477214
RPA2	0.477083
ERH	0.474663
STOML2	0.470444
PSMB1	0.470133
CDK2AP2	0.468367
DIABLO	0.466439
LSM8	0.457531
CKS1B	0.457257
ENSSSCG00000008170	0.451259
CDKN2C	0.446367
MXD3	0.4409
SRSF9	0.440363
ORC1	0.438194
KIF22	0.43056
ENSSSCG00000015337	0.428626
COX7B	0.428563
TCF19	0.427819
SLC25A5	0.424466
CDK4	0.421442
AQP3	0.419865
NDUFC1	0.416439
MAD2L1	0.415777
PSMA7	0.410166
ENSSSCG00000006395	0.409685
SGO2	0.407333
RPS3A	0.406275
KIF2C	0.406207
IMP4	0.405297
ENSSSCG00000004970	0.403914
PSMB4	0.403633
ASPM	0.402008
ENSSSCG00000002449	0.399904
MAD2L2	0.39827
NDUFB11	0.394592
BUD31	0.393762
LGALS1	0.39278
NAA38	0.389842
KIFC1	0.389017
ENSSSCG00000013597	0.385647
TMPO	0.385536
NDUFC2	0.383587
MDH1	0.379784
PFN1	0.379329
NCAPG	0.373338
UFD1	0.372665
ENSSSCG00000035811	0.37259
SSRP1	0.371202
UCHL5	0.371132
ENSSSCG00000037071	0.370174
ATP5F1A	0.370043
ATP5IF1	0.367263
ENSSSCG00000038359	0.353517
KIF4A	0.35015
UQCRC1	0.349951
HELLS	0.349487
ND4	0.348952
ACTR2	0.348576
LSM3	0.341965
ENSSSCG00000032003	0.341965
PLAC8	0.340576
ENSSSCG00000004666	0.339292
ENSSSCG00000002550	0.336919
ENSSSCG00000037143	0.326635
DBI	0.325226
COX1	0.323145
IKZF3	0.320792
RAP1A	0.320557
COTL1	0.320326
HDAC1	0.31983
PBK	0.319817
ALYREF	0.318056
CTSD	0.317383
PRDX3	0.315978
TALDO1	0.315844
NDUFV2	0.315462
LRRC59	0.312274
ORC6	0.312161
NDUFA6	0.310868
ENSSSCG00000003885	0.310668
ZNF367	0.308937
BCAS4	0.30427
ATP5F1C	0.30007
EIF3I	0.299696
RIDA	0.291951
ATP6	0.29188
ATP5PB	0.291587
HMGA1	0.291004
SDF2L1	0.290431
RPL6	0.290408
EVL	0.287885
ARPC4	0.287705
ENSSSCG00000000097	0.287635
ENSSSCG00000034129	0.285151
RFESD	0.284939
UQCRC2	0.281086
TPT1	0.279877
KIF15	0.279194
CALM1	0.278034
CCR5	0.277835
ATP5MD	0.277395
VIM	0.276162
NDUFB2	0.275271
VCP	0.274693
TIMM8B	0.273964
PNISR	0.273814
ARHGDIB	0.272354
ACADM	0.270941
CACYBP	0.269597
ENSSSCG00000038444	0.269421
ETF1	0.26806
EIF1AX	0.264219
ENSSSCG00000039740	0.263563
MRPL58	0.263374
AP2S1	0.263165
FAM32A	0.261775
GHITM	0.261727
PSMB6	0.260422
ATP5MC1	0.259702
ENSSSCG00000032946	0.258642
MCM10	0.257448
ENSSSCG00000034697	0.257433
NDUFB10	0.256545
RNASEH2B	0.256523
SNRPD3	0.254692
CLTA	0.252774
USP1	0.25214
ENSSSCG00000016100	0.250897
ENSSSCG00000013064	0.248046
ENSSSCG00000000849	0.247162
CDC45	0.24694
GMNN	0.245959
MYL6	0.245751
ENSSSCG00000004969	0.2454
CAPZB	0.243595
PIH1D1	0.242877
PPP4C	0.242763
GNAI2	0.240924
RPL17.C18orf32	0.24032
SF3B6	0.239636
SEC11C	0.239629
ELOC	0.238065
PTGES3	0.237788
DUSP14	0.236891
MICOS10	0.235598
ENSSSCG00000007609	0.235076
PSMA3	0.23478
RAC1	0.233005
SNF8	0.232944
TMEM123	0.232844
AKIP1	0.232305
NT5C	0.230491
ANAPC15	0.230455
PPIB	0.229663
HNRNPM	0.229499
ENSSSCG00000014371	0.227999
PRDX6	0.227351
RBBP7	0.226142
ENSSSCG00000010214	0.225762
MRPL57	0.225506
HAUS1	0.225158
NDUFA11	0.224211
ENSSSCG00000034019	0.223801
ENSSSCG00000028485	0.222137
RBM14	0.220923
ENSSSCG00000029066	0.220358
EIF4A2	0.218721
SPCS3	0.218578
ENSSSCG00000013366	0.218311
TMEM258	0.217194
S100A11	0.217052
PSMB3	0.216882
RFC3	0.21581
ENSSSCG00000016902	0.215221
SGO1	0.210894
ENSSSCG00000034314	0.210739
SUPT4H1	0.209665
MRPS12	0.209573
AURKAIP1	0.209404
ENSSSCG00000001229	0.209076
ACP1	0.208667
PNRC1	0.208457
HNRNPR	0.207232
NANS	0.20481
GTF2H5	0.202498
RPS20	0.198683
HSP90AA1	0.198587
ENSSSCG00000000273	0.198492
ATP5PF	0.198188
ENSSSCG00000037595	0.197928
IFITM3	0.193132
NME1	0.192722
ENSSSCG00000029830	0.192113
SNRPA1	0.192095
NASP	0.191606
PSMB8	0.191308
THOC6	0.18985
H3F3A	0.187302
ENSSSCG00000020830	0.185021
DEPDC1B	0.184263
SLBP	0.184102
PTBP1	0.1839
RPS23	0.183478
CAP1	0.182894
NUP37	0.182012
SKA2	0.181503
MELK	0.180825
NDUFS7	0.180558
ENSSSCG00000007493	0.180306
ENSSSCG00000009851	0.180085
CDK2	0.179007
NDUFB6	0.178383
LAG3	0.178031
SH2D1A	0.175239
ECHS1	0.174214
ENSA	0.174143
CCT8	0.173357
PSMD3	0.173324
CD37	0.172696
SAP18	0.170638
ABLIM1	0.170226
TMEM50A	0.170129
NDUFB4	0.169946
BAK1	0.169595
NUDC	0.16741
PRELID1	0.165531
EIF4A1	0.164019
SCML4	0.161593
MIS18A	0.160782
KIF11	0.16007
PRR11	0.159533
ENSSSCG00000031912	0.159173
LMAN2	0.15833
SIVA1	0.157516
CAMK4	0.155956
CDCA3	0.154664
ENSSSCG00000014569	0.15424
GPR19	0.154207
SMC1A	0.153812
NDUFB8	0.153187
ENSSSCG00000024973	0.151134
LCP1	0.150953
LSP1	0.149676
ENSSSCG00000011764	0.149096
CD63	0.147363
ENSSSCG00000029857	0.147331
SMC4	0.146385
NIFK	0.144831
FBXO5	0.144103
RPL39	0.143668
TRAF3IP3	0.142048
RNF181	0.141974
ENSSSCG00000033733	0.141337
ENSSSCG00000000002	0.140516
SAT1	0.140469
CDKN2AIPNL	0.139833
EMC3	0.139595
RPL7	0.139552
ENSSSCG00000032166	0.139164
FAXDC2	0.138502
NCAPH	0.138426
TGIF2.RAB5IF	0.138144
NDC80	0.136148
MRPL40	0.134018
CCT7	0.133867
ND3	0.133472
ND5	0.133125
ENSSSCG00000007743	0.132441
RPLP0	0.132377
ENSSSCG00000023331	0.131833
HDAC2	0.131738
ENSSSCG00000036658	0.131576
MAX	0.130826
GNB2	0.130779
ENSSSCG00000030295	0.130577
COX7A2L	0.130452
ENSSSCG00000035520	0.129519
GRB2	0.129288
MANF	0.129278
PAIP2	0.128423
ISG15	0.127922
RPS6	0.127829
ANAPC16	0.127775
PVRIG	0.127121
ATP6V1D	0.126866
AP1S1	0.126809
TRA2B	0.126059
PAXX	0.125535
NEDD8	0.125414
PPP1CA	0.125333
CD99	0.124988
WDR1	0.124117
RPS11	0.12396
ENSSSCG00000037081	0.123715
RPL26	0.123684
CTSB	0.123613
EIF2S2	0.122579
EMB	0.122559
ENSSSCG00000001398	0.122404
COX6A1	0.122385
SLC25A6	0.12238
WDR76	0.122225
ENSSSCG00000001075	0.121882
PPID	0.121728
NUDT21	0.121288
IQGAP2	0.119934
NKG7	0.1198
SERBP1	0.119542
METTL27	0.11927
POLR2G	0.119241
TSC22D3	0.118993
HSPA8	0.118885
RTRAF	0.117689
SRPK1	0.116468
UBB	0.115638
RGS19	0.115474
EIF4H	0.115281
HCST	0.114911
CDC42SE1	0.114595
COX4I1	0.114032
PSMB7	0.113981
DYNLRB1	0.113844
TXN2	0.113573
NRM	0.113194
ENSSSCG00000036618	0.112787
ARPC5	0.11263
MT3	0.112537
BRK1	0.111917
EIF3K	0.111374
RPL22	0.111286
SLC9A3R1	0.11046
CNN2	0.110363
YWHAZ	0.110077
ADGRG1	0.109558
ENSSSCG00000027196	0.109103
RPS17	0.109016
EEF2	0.108969
ENO1	0.106173
GLIPR2	0.106137
SF3B5	0.105876
ENSSSCG00000017928	0.105431
ENSSSCG00000024974	0.105119
UBE4A	0.104975
ENSSSCG00000027826	0.1048
RPL5	0.1047
ARHGAP15	0.104536
CRELD2	0.103724
AIMP1	0.103616
PKMYT1	0.102651
FYB1	0.102434
ENSSSCG00000011952	0.102385
H3F3B	0.10149
ENSSSCG00000009303	0.101399
ROMO1	0.101181
PKM	0.101164
FGD3	0.10087
ENSSSCG00000003903	0.100672
CDCA7	0.10049
ENSSSCG00000001341	0.100399
ESCO2	0.0999848
RPL3	0.0996174
ENSSSCG00000000905	0.0995834
RPLP2	0.0995442
ISCU	0.0991987
S100A4	0.0986033
CHAF1A	0.0985232
MND1	0.0985082
ITGB7	0.0982696
ENSSSCG00000015215	0.0982664
RCAN3	0.0982361
ENSSSCG00000031773	0.0981798
SUMO1	0.0978041
ENSSSCG00000035538	0.0977163
IL7R	0.0976699
BRCA1	0.0967856
ENSSSCG00000030300	0.0966697
ENSSSCG00000023158	0.0966118
ENSSSCG00000038989	0.0963004
POLR2D	0.0957647
LRCH4	0.0957568
OSTF1	0.0957475
SRGN	0.0952574
SRRM2	0.094375
SMIM19	0.0940412
RPS13	0.0937814
TMCO1	0.0937399
SMARCB1	0.0935091
ENSSSCG00000027573	0.0934707
ENSSSCG00000004145	0.0934362
BCAP31	0.0934202
DNAJC19	0.0928172
ENSSSCG00000033697	0.0922792
MAP3K1	0.0922577
ENSSSCG00000015040	0.0922299
COX5A	0.0921468
ENSSSCG00000033566	0.0915507
ENSSSCG00000038711	0.0911539
SEC11A	0.0908711
KIF2A	0.0904
RBM8A	0.09032
SLC25A3	0.0902114
ENSSSCG00000036716	0.0899375
ENSSSCG00000010203	0.0898877
NTAN1	0.0897199
ENSSSCG00000037030	0.0893666
RPN2	0.0888683
ITM2B	0.0888675
TOX4	0.0887619
CIT	0.0886804
CSRP1	0.0880191
UCP2	0.0878653
ENSSSCG00000037602	0.0877733
ENSSSCG00000024791	0.0875915
SF3B2	0.0875503
ENSSSCG00000025631	0.0871033
ENSSSCG00000037885	0.0867378
ENSSSCG00000039107	0.0866315
ZFP36L2	0.0859999
MYDGF	0.0855691
PABPC1	0.0855564
GABARAP	0.0846574
SKAP1	0.0846557
PTPRC	0.0844952
ENSSSCG00000000576	0.0841602
BIN2	0.0840644
2021-09-01	0.0839246
BCLAF1	0.0828746
TLE5	0.0828213
ENSSSCG00000040396	0.0826592
CHORDC1	0.0822608
PDAP1	0.081692
PARVG	0.0815234
SAMHD1	0.0813575
ELAVL1	0.081091
CD3E	0.0810527
TST	0.0809158
HIST1H3E	0.0808526
TMEM109	0.0805496
LAPTM5	0.0802656
ENSSSCG00000008183	0.0801513
ENSSSCG00000031897	0.0801276
TMEM160	0.0800588
YWHAB	0.0799317
PLEKHF1	0.0798984
ENSSSCG00000030122	0.079718
HSPD1	0.0796521
HIGD2A	0.0795619
PSMB2	0.0794069
LAT	0.0787487
ENSSSCG00000033744	0.0785773
PDCD1	0.078398
ENSSSCG00000040248	0.0783893
HMOX2	0.0782953
CEP55	0.0781862
MIF	0.0780088
PARP1	0.0779127
KIF20A	0.0775787
PRDX2	0.0774481
ARL6IP5	0.0774357
RACGAP1	0.0767862
ENSSSCG00000005656	0.0767051
ENSSSCG00000039731	0.076703
NSD3	0.0763207
CSTB	0.0760519
SRP14	0.0759178
RAC2	0.0757276
PRPF40A	0.0755071
UBE2S	0.0753393
RPL10A	0.0752073
NDUFS6	0.0751693
EPSTI1	0.0751582
PLP2	0.0748903
IDH2	0.0747964
MRPL22	0.0747483
SRSF5	0.0747353
PRR7	0.0746048
PDIA4	0.0745921
ZRANB2	0.074498
ARHGAP11A	0.0744933
FANCD2	0.0744155
ATP5PO	0.0740153
ANKRD12	0.0737657
PIK3IP1	0.0735614
GSPT1	0.0731473
ANAPC13	0.0730916
SELENOT	0.0730759
VAMP8	0.0728444
CYB561D2	0.0727108
IL10	0.0723692
TECR	0.0722632
CYLD	0.0721216
SPTAN1	0.0720904
EIF3H	0.0720675
NDUFS4	0.0719324
ENSSSCG00000038364	0.0718964
ENSSSCG00000002004	0.0718731
MALT1	0.0718003
ENSSSCG00000035869	0.0717739
ENSSSCG00000006081	0.0716957
HP1BP3	0.0714876
NOP53	0.0714677
PTPRCAP	0.0713513
ENSSSCG00000033721	0.0712411
SRSF10	0.071227
MOB3A	0.0711084
RACK1	0.0710455
MBD2	0.0709496
SLA2	0.0707794
EMP3	0.0706498
ATAD2	0.0705708
COX17	0.0703767
EFHD2	0.0703608
RPS5	0.0701544
NOP58	0.069927
TAX1BP1	0.069888
ENSSSCG00000037054	0.0698386
ENSSSCG00000003849	0.0693786
PTP4A2	0.0690867
ENSSSCG00000008433	0.0690525
LAMTOR5	0.0690113
ENSSSCG00000003691	0.0687883
NXT1	0.0687815
CDC123	0.0687281
BLVRB	0.0683381
LNPEP	0.0679442
H2AFY	0.0679287
PPP4R3B	0.0678732
CCR7	0.0678021
FTL	0.0677686
ENSSSCG00000025060	0.0677055
ENSSSCG00000009145	0.0676755
MRPL38	0.0676537
NEK2	0.0673759
ENSSSCG00000028479	0.0672236
ENSSSCG00000014565	0.0671793
ENSSSCG00000036247	0.0670569
ENSSSCG00000033212	0.066998
HNRNPDL	0.0668194
RHOC	0.0667143
COPS6	0.0663481
AKR1A1	0.0660743
HNRNPH3	0.0659723
AOAH	0.0656755
ENSSSCG00000004446	0.0653764
CANX	0.0652113
PSME1	0.0651196
CD247	0.0651049
ENSSSCG00000000697	0.0651015
EEF1D	0.0650286
SCAND1	0.0648385
ILK	0.064799
RPS12	0.0647567
BIRC3	0.0647558
ARGLU1	0.0647247
JAK1	0.0647229
SP110	0.0647016
ENSSSCG00000018063	0.064602
GPSM3	0.0645498
TMA7	0.0644775
UBXN1	0.0644172
NDUFS2	0.0642477
API5	0.0640674
ELMO1	0.0636324
SF3B1	0.0636159
ENSSSCG00000000657	0.0634802
OTUB1	0.0632601
ENSSSCG00000024419	0.0632581
PRDX4	0.0631805
TBCA	0.0628443
PPIH	0.062813
MRRF	0.0627346
AHCY	0.0624278
RPS26	0.0621997
GALE	0.0621716
STK38	0.0621633
ENSSSCG00000000887	0.061977
SLIRP	0.0619717
RPSA	0.0618656
EIF4B	0.0617192
RORA	0.0616782
ILF3	0.0616036
VMP1	0.0615731
ENSSSCG00000008061	0.0615432
HNRNPC	0.0615047
TUT4	0.061411
RBM42	0.0614017
MYO1F	0.0613986
SEC61G	0.0612268
TASOR	0.0611812
COX7C	0.0610524
GPX1	0.0610328
MED21	0.0610167
NCAPG2	0.060986
ENSSSCG00000014540	0.060961
ENSSSCG00000035728	0.0609095
IFI6	0.0608453
CD2	0.0606522
CNPY2	0.0605624
RPL7A	0.0602694
IL6R	0.0602464
ACSS1	0.0601349
SLC1A5	0.0601047
ENSSSCG00000017509	0.0600036
ENSSSCG00000004782	0.0599433
ETFB	0.0598203
DYNLT1	0.0596939
HMCES	0.0594583
CCND3	0.0593292
ENSSSCG00000034527	0.0593234
ISYNA1	0.0591667
PSMC5	0.0591624
NOL7	0.0590996
ARPC1B	0.0590933
CD5	0.0590276
ETS1	0.0590107
ENSSSCG00000014850	0.0588393
LEPROTL1	0.0588172
ENSSSCG00000016679	0.058402
MOSPD3	0.0582344
RTF1	0.0581447
ENSSSCG00000004489	0.0580332
SMARCA5	0.0579879
COMT	0.0579635
SMC3	0.0577546
CENPH	0.0576792
ACOT7	0.0576367
AK6	0.0574935
OAZ1	0.0574223
S1PR1	0.0573643
MKKS	0.0573451
SRRM1	0.0571309
ENSSSCG00000007253	0.0570145
ENSSSCG00000008352	0.0568268
TMEM30A	0.0567965
NDUFA13	0.0565976
CNP	0.0565742
UBE2D3	0.0565634
MYO5A	0.0565285
RNPEP	0.0565136
ND1	0.0563668
STRADB	0.0563196
BTF3	0.0562431
ENSSSCG00000034190	0.0562145
ALKBH7	0.0561569
ENSSSCG00000034072	0.055977
BRCA2	0.0559747
ENSSSCG00000036114	0.0559269
EIF4G2	0.0556645
LIMK2	0.0555925
ENSSSCG00000013721	0.0555861
SPTSSA	0.0555392
FAAP24	0.055521
NCAPD2	0.0554432
TBC1D10C	0.0553625
SRSF7	0.0552446
CHMP4B	0.0551148
ZFP36L1	0.0550929
KRTCAP2	0.0549898
ENSSSCG00000039046	0.0549763
NDFIP2	0.0549579
ENSSSCG00000010320	0.054859
FADS3	0.0547004
ATRX	0.0546437
ATOX1	0.054532
ARHGAP1	0.054487
SNRNP25	0.0544327
ENSSSCG00000009772	0.0543827
ENSSSCG00000016263	0.0543563
HYPK	0.0542786
CD70	0.0541227
RPIA	0.0540619
BAD	0.0540219
G3BP1	0.0539767
GNG2	0.0538675
ID2	0.0537955
IFNG	0.0537826
ATP2A3	0.0537795
NFYB	0.0537371
CARHSP1	0.0536704
CORO1C	0.0535362
FUT7	0.053518
SLC35B3	0.0535008
PKIG	0.0532959
TIMM22	0.0532343
EIF4EBP1	0.0531585
TCF7	0.0531432
ROCK1	0.0531087
CLINT1	0.0530364
BARD1	0.0529866
AAAS	0.0529678
CMPK2	0.0529044
CAPZA2	0.0529023
ARL6IP1	0.0528576
PSMD13	0.0528035
HM13	0.0527661
CHRAC1	0.0527642
HNRNPLL	0.0527281
ENSSSCG00000033700	0.0526482
ENSSSCG00000012166	0.0526029
S100A13	0.052568
UBC	0.0524961
GPR183	0.0524489
TM9SF3	0.0524203
BUD23	0.0523749
TMEM9B	0.0522579
SUMO2	0.052251
LSM7	0.0521637
FLI1	0.0521228
NPM1	0.0518814
RBM4	0.0517592
BAG1	0.0517404
METAP2	0.0516727
F2R	0.0516197
GTF2B	0.0514872
ENSSSCG00000004945	0.051329
MRPS18B	0.0512926
SIT1	0.0512207
ENSSSCG00000017626	0.0512162
KRAS	0.0509752
RNASEH2C	0.0509178
ENSSSCG00000022176	0.0508868
WASHC3	0.0508625
C6orf62	0.0507548
NCOA7	0.0507247
SCLY	0.0505726
ENSSSCG00000013889	0.0504557
RNF149	0.0504136
ENSSSCG00000033909	0.0503851
AP1G2	0.0503586
ENSSSCG00000000071	0.0503284
HAUS6	0.0503175
ENSSSCG00000029596	0.0502381
UBXN4	0.0502091
ENSSSCG00000006628	0.0501495
TXNL1	0.0501193
ENSSSCG00000020777	0.0501059
ENSSSCG00000013720	0.0500473
PFDN1	0.050006
CHD3	0.0499338
PFDN4	0.0499239
ND2	0.0498756
PSTPIP1	0.0496861
PNRC2	0.0495934
KXD1	0.0495488
SLC30A6	0.0495475
ARF6	0.0492925
ENSSSCG00000036491	0.049225
LYAR	0.049192
ENSSSCG00000007188	0.0491806
PAK2	0.0491789
PTBP3	0.0491611
NDUFB9	0.0491519
TMBIM6	0.0491443
PSIP1	0.0491438
TOPBP1	0.0491326
SEC13	0.0491252
HNRNPH2	0.0490531
ENSSSCG00000006418	0.0489541
ENSSSCG00000022912	0.0489454
ENSSSCG00000023323	0.0489389
ENSSSCG00000023595	0.0489164
ABI1	0.0489008
KIF20B	0.0488956
GSN	0.048886
SUGT1	0.0488188
GDI2	0.048796
CD40LG	0.0486016
HSD17B12	0.0485259
POLR2F	0.0483384
GMFG	0.0483196
ENSSSCG00000023792	0.048317
MIER1	0.0482725
TRAM1	0.0482432
EZR	0.0481994
TRMT1L	0.0481863
ACTN4	0.0481644
PPP1R18	0.0480493
ITGB2	0.0479972
CDC6	0.0479929
ENSSSCG00000003261	0.0479687
IVNS1ABP	0.0479324
ENSSSCG00000012997	0.0477365
KLF2	0.0476776
NBR1	0.0475234
LIMD2	0.0473848
GPS1	0.0472266
PPIG	0.0472064
IPO5	0.0471351
CTSS	0.0471209
ENSSSCG00000002790	0.0470259
HSPA5	0.0469204
GZMB	0.0469181
HNRNPH1	0.0469021
PPIL1	0.0467734
SYT11	0.0467391
ENSSSCG00000020808	0.0467119
PDS5A	0.0466755
ENSSSCG00000036829	0.0466136
TSPO	0.0465603
ENSSSCG00000039658	0.0465327
POLR2K	0.0465113
ENSSSCG00000010685	0.0464562
C12orf10	0.0463899
NT5C2	0.0463626
SPINT2	0.0462799
CHEK2	0.0462538
SHKBP1	0.0462494
UBA1	0.0461615
RAP2B	0.0461292
ENSSSCG00000017555	0.0461278
NDFIP1	0.0461162
POLR1D	0.0460982
WDR82	0.0460611
UXT	0.0460206
HNRNPK	0.0460178
ARF4	0.0460128
CCDC146	0.0459794
CCNG1	0.0458737
NRROS	0.0458725
SFT2D1	0.0458695
SGTA	0.0458613
EIF5B	0.0458535
SLA	0.0458525
AMIGO3	0.0457667
PRKACB	0.0456895
TBRG4	0.0456596
PARK7	0.0456492
PSMD7	0.0456028
MCL1	0.0455704
UNC13D	0.0455449
RPS18	0.0455263
HSPA4	0.0454081
CPSF4	0.0453713
ENSSSCG00000010158	0.045333
ENSSSCG00000006870	0.0453321
DNAJC18	0.04531
ENSSSCG00000013155	0.0453004
RSL1D1	0.0452846
TBC1D13	0.0450602
ANXA5	0.0450591
TRMT112	0.0450284
FLII	0.0449632
PSMA6	0.0449523
PRMT7	0.0449006
ENSSSCG00000036197	0.0448852
ESF1	0.0448784
PSMC6	0.0447983
UBE2G1	0.044601
EIF3L	0.0445889
TSR1	0.0445001
NME2	0.0444596
UNC119	0.0443774
TWF2	0.0443622
ENSSSCG00000030183	0.0442403
ENSSSCG00000011237	0.0441241
COX6C	0.0441041
MRPL18	0.0440815
DYNLT3	0.0439573
BID	0.0439572
ZNF75D	0.0438775
KARS	0.0438524
CD53	0.0437446
BBX	0.0436271
ENSSSCG00000033814	0.0436254
MRPS24	0.0435616
CMAS	0.0435507
ARID1A	0.043545
STAT5B	0.0434746
ENSSSCG00000034868	0.0434001
BZW1	0.0433461
CUTA	0.0433249
IKZF2	0.04326
DNAJC15	0.0431637
LIN7C	0.0431192
NUB1	0.0430719
SSR2	0.043059
MPHOSPH10	0.0429826
CYP51A1	0.0429268
ENSSSCG00000010931	0.0429132
TMEM147	0.0429067
ALG13	0.0428389
ENSSSCG00000003520	0.0428075
URM1	0.0428057
SELENOH	0.0427536
GALK1	0.0426754
SRSF2	0.0425776
ENSSSCG00000033019	0.0424012
GRK6	0.0423906
CDC37L1	0.0423604
UBE2V1	0.0423487
GADD45GIP1	0.0423042
SMAP1	0.0422522
U2SURP	0.0422053
UFM1	0.0421598
MPHOSPH6	0.0421589
TBX21	0.0421424
TPRKB	0.0421417
CHIC2	0.0421177
DBNL	0.0421077
STK17B	0.0420811
TUT7	0.0420388
RALY	0.0419456
REEP5	0.0419108
ENSSSCG00000006324	0.0418885
FAF1	0.0417373
SSR3	0.0417276
AKR1B1	0.0417155
ENSSSCG00000033880	0.0415444
E2F8	0.0414511
NECAP2	0.041401
MAP4K1	0.0413707
NDUFS5	0.0413088
STAG2	0.0411837
TTPAL	0.0411794
MTREX	0.0411293
ENSSSCG00000016758	0.0411057
MBNL1	0.0410304
GGH	0.0409838
P2RY11	0.040982
ENSSSCG00000004963	0.0409808
GOLM1	0.0409669
ENSSSCG00000025499	0.0409622
CD74	0.0409557
EIF2A	0.0408677
SMCHD1	0.0408342
SGF29	0.0406624
RSU1	0.0406619
ENSSSCG00000021591	0.040645
SMPD2	0.0404752
ENSSSCG00000027491	0.0404656
TXK	0.0404227
BCCIP	0.0404024
ATP6AP1	0.0403884
ENSSSCG00000013661	0.0403702
ESS2	0.0401613
CDC42SE2	0.0400883
ENSSSCG00000034711	0.0400389
CNBP	0.0399651
PAF1	0.0399451
GYPC	0.039934
MSN	0.0398402
PNPLA2	0.0398098
DDX1	0.0398066
GPBP1	0.0397787
M6PR	0.0397735
ATF2	0.0397519
VASP	0.0396644
NUDT1	0.0396455
ZC3H15	0.0396147
AP1M1	0.0395499
MRPL9	0.0395253
ATF6	0.0395005
CEP192	0.0394372
HSP90AB1	0.0393987
RAB22A	0.0393863
CDKN1B	0.039277
CTSC	0.0392508
NCK1	0.0392473
ENSSSCG00000013723	0.039223
ELOA	0.039194
RPS4X	0.0391921
MRPS26	0.0391632
PHB	0.0391286
PPP2CA	0.0390965
TXNDC17	0.0390833
SYS1	0.0390784
DNAJA1	0.0390689
BCAS2	0.0390473
RAD51D	0.0390373
CCNH	0.0389915
ENSSSCG00000032382	0.0389723
NPTN	0.0389465
PFDN2	0.0389206
CDC27	0.038887
PSMB9	0.0388496
ACOT8	0.0388485
ABCF1	0.0388277
CCDC50	0.0387356
MAP1LC3B	0.0387047
CYC1	0.038699
MAP2K7	0.0386914
ENSSSCG00000004583	0.0386833
WDR90	0.0386761
RPL26L1	0.0386609
ENSSSCG00000007978	0.038528
DDX21	0.0384876
RBM18	0.0384746
TES	0.0384038
CASP6	0.0383745
ENSSSCG00000010517	0.0383629
DUSP11	0.0382985
HSD17B7	0.0382477
MRPS15	0.0382354
FMC1	0.0382057
CAPZA1	0.0382013
PLVAP	0.0381819
C5orf24	0.0381695
ATP6V1B2	0.0380591
PCBP2	0.0380516
PXMP4	0.0380413
ENSSSCG00000012178	0.0380378
TAF7	0.0379487
TSPAN5	0.037936
DDRGK1	0.0379338
ZBTB18	0.0378478
MEMO1	0.0377412
EIF6	0.0377254
CTSA	0.0376168
ENSSSCG00000015499	0.0376016
PHF20L1	0.0375988
KHDRBS1	0.0375798
SAR1A	0.0375526
RNPS1	0.0375499
FAM49B	0.0374688
RCC1	0.0373335
IDH3B	0.0373114
ENSSSCG00000000377	0.0372992
SPCS1	0.0372304
ZNF148	0.0371615
SUSD3	0.0371594
ARFGAP1	0.0371259
CAPG	0.0371012
MORF4L1	0.0370835
GYG1	0.0370278
SRI	0.0369767
RNF115	0.0369347
TUFT1	0.0369005
SAMD9	0.0369
SNRPN	0.0368166
RMI2	0.036776
TNFAIP8	0.0367726
RNF7	0.0367473
UBR1	0.036724
FBXO25	0.0366207
ZNF395	0.0366037
CAT	0.0366037
TNRC6B	0.0365734
BNIP3	0.0365627
ENSSSCG00000011798	0.0365197
ATP5F1E	0.0365055
MTHFD1	0.036501
ENSSSCG00000006376	0.0364923
RAB2A	0.0364559
PUF60	0.0364249
SLC35C2	0.0364061
SYAP1	0.0363844
USE1	0.0363648
STAT5A	0.0362865
LCP2	0.0362863
EIF2S1	0.0362293
RAD54L	0.0361622
ANXA7	0.0361531
KPNB1	0.0361183
BIN3	0.0361172
BRWD1	0.0360839
ENSSSCG00000016768	0.0360835
VPS29	0.0360729
OS9	0.0360587
ENSSSCG00000031580	0.0360015
ENSSSCG00000024313	0.0359892
NPL	0.0359833
RNF113A	0.0359413
PDIA3	0.0359395
ATP2B1	0.035888
ENSSSCG00000001779	0.0358733
CAST	0.0358509
PRF1	0.0358165
ENSSSCG00000027840	0.0357731
DNAJC2	0.0357367
TIGIT	0.0357172
CWF19L2	0.0357159
ENSSSCG00000006061	0.0356724
DDX17	0.0355783
COMTD1	0.035574
ZNF622	0.0355213
MFNG	0.035412
TMEM59	0.0353829
GOLGA7	0.0353617
ENSSSCG00000004556	0.0353422
MOBKL3	0.0352844
ENSSSCG00000021663	0.0352782
GUK1	0.0352774
EIF4A3	0.0352452
PTGDR2	0.0352107
TGIF1	0.0351598
ENSSSCG00000040118	0.0351484
CCT4	0.0351408
SNU13	0.0351216
NIPSNAP3B	0.0351092
TIMM10	0.0350928
HSPA4L	0.0350874
NCL	0.0350591
CD6	0.0349553
CDC37	0.0349061
COMMD4	0.034888
PYM1	0.0348685
NAP1L1	0.0348333
WDR70	0.0348108
CFDP1	0.0348107
SLA.DQB1	0.0347848
HIKESHI	0.0347612
PTPN18	0.0347224
SETD2	0.0347031
ZAP70	0.034669
PTPRJ	0.0346414
LUC7L	0.0346412
NCK2	0.0346132
TNKS2	0.0345725
CSNK1A1	0.0345042
PPP1CC	0.0344455
TSPAN14	0.0344152
PNPT1	0.0343958
PRKAR1A	0.0343865
NNT	0.0343766
RAP1GDS1	0.0343538
STAT1	0.0343212
RPS10.NUDT3	0.0342742
HSPE1	0.034269
VPS4B	0.0342659
PIGY	0.0341853
RETREG2	0.0341819
ARCN1	0.0341661
CHCHD6	0.0341581
SMDT1	0.0340797
ZNHIT1	0.0340762
ENSSSCG00000027675	0.0340619
AP3B1	0.0340554
ENSSSCG00000013052	0.0339664
PSEN1	0.0339628
ENSSSCG00000012811	0.033951
ENSSSCG00000007031	0.0339474
ENSSSCG00000038754	0.0339465
UQCC3	0.0339441
WTAP	0.033895
NCALD	0.0338445
ENSSSCG00000015814	0.0338289
SPAG8	0.0338262
LMO4	0.0338041
IFNGR2	0.0337787
ACAD9	0.0337714
EIF3E	0.033716
CAMTA2	0.033702
TPP2	0.0336181
ENSSSCG00000021236	0.0335577
SMIM7	0.0335508
FEZ2	0.0334601
PUS1	0.0334502
TMEM60	0.033435
SDHD	0.0334064
UBALD2	0.0333988
PRKAA1	0.0333892
PDK1	0.0333607
RCAN2	0.033317
KLF3	0.0332877
TCP11L1	0.033278
RBBP4	0.0332464
ENSSSCG00000033500	0.0331339
ATP6V0D1	0.0331236
ARHGEF39	0.0330853
ENSSSCG00000004518	0.0330779
TANGO2	0.0330421
DDX54	0.0329574
ENSSSCG00000002547	0.0329246
GSTZ1	0.0329084
SPAST	0.0329044
POLE3	0.0328582
HMGN3	0.0328395
RDH16	0.032834
NSMCE2	0.0328259
POLR2I	0.0328081
ARF3	0.0328041
ENSSSCG00000012746	0.0327755
USP48	0.0327675
ENSSSCG00000026446	0.0326935
ATP5ME	0.0326773
GMFB	0.0326771
RIPK1	0.0326705
CD81	0.0326364
NCBP2	0.0326288
CHID1	0.0325813
LCK	0.032579
AP2B1	0.0325635
MICOS13	0.0325351
GSR	0.0325349
POC1A	0.0325174
COX19	0.0324779
ENSSSCG00000018061	0.03243
DHDH	0.0323976
OCIAD1	0.0323777
PSMC3	0.0323132
UBE2B	0.0323
ENSSSCG00000009309	0.0322726
PRDX5	0.032243
NDUFAF8	0.0322375
ANXA11	0.0322299
KREMEN2	0.0322266
ARHGEF6	0.0322133
VPS28	0.0321681
MRPS23	0.0321667
CAPN1	0.0321655
KDSR	0.0321431
ENSSSCG00000001505	0.0320993
UBIAD1	0.0320838
ACP5	0.0320592
ENSSSCG00000015473	0.0320312
DAZAP1	0.0320195
OXR1	0.0320074
NARS	0.0319659
ENSSSCG00000036379	0.0319651
SARS	0.0319098
IRF2	0.0318707
B4GALNT1	0.0318565
SCAF4	0.0318471
PSMD14	0.031831
OPA1	0.0317982
BRMS1	0.0317389
STMN3	0.0317149
TUBB2B	0.0316848
ENSSSCG00000010734	0.031682
SUCLG2	0.0316696
MSH2	0.0316534
RPL27	0.0316259
SMARCA4	0.0315814
SKP1	0.0315747
ATG101	0.0315702
ENSSSCG00000016262	0.0315203
TMEM140	0.0315036
RPL36AL	0.0314719
RSL24D1	0.0314664
ABR	0.0314436
MCRIP2	0.0314241
PRDM1	0.0313921
UBE2V2	0.0313592
MARK3	0.0313374
HERPUD1	0.0312958
LGMN	0.0312927
NTPCR	0.0312861
PQLC3	0.0312815
HBP1	0.0312777
KNTC1	0.0312614
UBE3A	0.0312333
IFI44L	0.03121
ACYP1	0.0312076
FLT3LG	0.0311988
ENSSSCG00000027746	0.0311595
ENSSSCG00000017754	0.0311563
ACOT13	0.0311156
NUP50	0.0310976
ENSSSCG00000036659	0.0310882
TMED5	0.0310541
STAT2	0.0310487
CIAO2B	0.0310427
TAPBP	0.0310364
ZDHHC5	0.0310338
SLC4A7	0.0309787
ENSSSCG00000012307	0.0309331
ENSSSCG00000032459	0.0309226
RANBP2	0.0309209
RGCC	0.0309054
KPNA4	0.0308964
ACAT2	0.0308469
TCP1	0.0308308
ZNF713	0.0308209
CALCOCO2	0.0308118
ENSSSCG00000003348	0.0307988
PUM2	0.030797
ZMAT5	0.0307919
ENSSSCG00000002259	0.0307779
ENSSSCG00000035256	0.0307489
ENSSSCG00000000365	0.0307369
POLE	0.0307304
ENSSSCG00000016376	0.0307153
ZNF292	0.0306773
MRPL35	0.0306688
FAM76A	0.0306446
STARD4	0.0306361
EMC6	0.0306334
HSPA9	0.0305993
SENP6	0.0305937
CIAO2A	0.030593
ENSSSCG00000034709	0.0305115
ENSSSCG00000020706	0.0304561
CXCR3	0.0304103
FKBP3	0.0303869
SASH3	0.0303496
TMED9	0.0303386
C1orf131	0.0302993
VAMP5	0.0302961
ATP6V0C	0.0302899
LXN	0.0302823
PLEK	0.0302696
HNRNPU	0.0302563
TLN1	0.0302522
RCSD1	0.0302484
ICOS	0.0302383
FUNDC1	0.0302002
RNF5	0.0302001
PHGDH	0.0301861
RAD51	0.0301702
TP53INP1	0.0301187
CCDC137	0.0301139
DCUN1D1	0.0301069
ENSSSCG00000032134	0.0300448
MXD1	0.0300136
PIN4	0.0299813
COQ7	0.0299788
MRPS9	0.0299782
TM2D1	0.0299403
ACER3	0.0299257
GLMP	0.0299167
CCT5	0.0298167
ENSSSCG00000001396	0.02974
ENSSSCG00000039460	0.0297304
WDR34	0.029656
ENSSSCG00000027348	0.0296408
PSENEN	0.0296407
ENSSSCG00000031730	0.0295714
REL	0.0295118
MRPL10	0.0294952
RSRC2	0.0294754
ASXL2	0.0294155
ORAI1	0.0293984
IFIT1	0.0293931
ENSSSCG00000000635	0.0293918
ENSSSCG00000007322	0.029362
KCNAB2	0.0293452
RAF1	0.0293425
PANK3	0.0293363
CYB5A	0.029335
FANCI	0.0293161
TESC	0.0293035
NDUFA10	0.0292977
NMT1	0.0292821
IFI35	0.0292358
UBE2K	0.0292139
PRKD3	0.0291864
TIPRL	0.0291804
PRPF8	0.0291362
FDX1	0.0291247
EIF1	0.0291224
THOC7	0.0291083
SNX9	0.0290949
ARIH2	0.029077
INO80C	0.0290384
PPWD1	0.0290376
ENSSSCG00000011917	0.0290071
ATP5MC2	0.0289254
FLOT1	0.0289028
UQCRQ	0.0288898
MED14	0.028875
TENT5C	0.028862
RFC5	0.028852
COPS5	0.0288262
GFOD1	0.0288196
PYCR3	0.0288138
ENSSSCG00000016970	0.0287719
TBC1D20	0.028762
PLCL2	0.0287541
EI24	0.0287429
TMEM231	0.0286983
ASAP1	0.0286368
ENSSSCG00000039618	0.0285508
RBM5	0.0285498
CYTIP	0.0285491
RPS6KA1	0.0285428
RASA1	0.0285287
ENSSSCG00000020790	0.0285062
MRPS35	0.0284908
CCAR1	0.0284833
POLR3K	0.0284807
ENSSSCG00000013411	0.028446
ENSSSCG00000027565	0.0284388
TMEM192	0.0283942
ENSSSCG00000038539	0.0283369
TSFM	0.0283366
THUMPD3	0.0283148
ARHGAP25	0.0283099
RAD21	0.0283075
ZMYND10	0.0283018
PIGT	0.0282559
FCF1	0.0282487
CTSW	0.0282142
TRAF5	0.0281968
RAP1B	0.0281821
CIB1	0.0281596
JAML	0.0281482
ITSN2	0.0281387
THYN1	0.0281134
SYF2	0.028107
NFKBIZ	0.0281018
MOGS	0.0280695
CREBBP	0.0280663
IAH1	0.0280537
ADAM10	0.028039
CCPG1	0.0280207
SH3KBP1	0.0280175
TMEM107	0.0280114
PPIL2	0.0279998
HES1	0.0279967
RALBP1	0.0279795
EIF4E	0.0279706
TTC3	0.0279085
SIPA1	0.0279083
CCNI	0.027895
NDUFS3	0.0278944
ENSSSCG00000010674	0.0278889
CENPL	0.0278883
PSMD12	0.0278797
SHISA5	0.0278773
MLF2	0.0278748
RMDN3	0.0278533
SMUG1	0.0278255
RESF1	0.0278161
MAPRE2	0.0278046
TRIM8	0.0277996
SH3BGRL3	0.0277908
CD3G	0.0277702
TCEA1	0.0277478
MPC2	0.0277388
JARID2	0.0276991
FBXL17	0.0276816
ATP6V1G1	0.0276751
SETD9	0.0276735
CD1D	0.0276683
ASB9	0.0275941
MOV10	0.0275929
RAB8B	0.0275721
PSPC1	0.027501
TP53	0.0274386
TOR4A	0.0273945
ETHE1	0.027372
ENSSSCG00000004307	0.0273538
SLC35E3	0.0273219
CLCN3	0.0273137
DUS4L	0.0273022
ENSSSCG00000040810	0.0272851
ENSSSCG00000011234	0.0272683
CDC7	0.0272461
ENSSSCG00000005518	0.0272447
C12orf75	0.0272336
TMED4	0.0272299
ENSSSCG00000032918	0.0272121
LAMTOR3	0.0272101
SEC61B	0.0271944
MEAF6	0.0271814
ENSSSCG00000007355	0.0271532
PDCD10	0.027145
NUBP1	0.0271176
NFKB1	0.0270901
MISP3	0.0270812
EIF4E2	0.0270764
IK	0.0270614
DCTN2	0.0270534
NCOA1	0.0270338
HDGFL2	0.0270315
PLB1	0.0269796
DHRS3	0.0269666
GPR174	0.0269543
CDADC1	0.0269195
ENSSSCG00000014296	0.0269141
HERC4	0.0269009
BLOC1S6	0.0268983
C12orf49	0.0268871
APBB1IP	0.0268773
TM9SF2	0.0268689
WDR74	0.0268615
RINL	0.0268467
RTCB	0.0268396
HNRNPA3	0.0268329
FAM210A	0.0268297
SELL	0.0268246
BIRC6	0.0267768
THOC5	0.0267344
INSIG1	0.0267343
ENSSSCG00000032609	0.026703
SLC9A9	0.0266931
VTA1	0.0266621
RDX	0.0266558
ATPAF2	0.0266551
EPC1	0.026653
SF3A3	0.0266433
SLC35E1	0.026631
PAFAH1B1	0.026621
DEPDC1	0.0266103
LAX1	0.0265943
PCSK7	0.0265911
WDR41	0.0265748
MAP10	0.0265589
CDIPT	0.0265501
MCRS1	0.0265414
ENSSSCG00000031255	0.0265408
OAS2	0.0265312
DNAJC17	0.0265304
SNRK	0.0265151
SERPINF1	0.0264949
ENSSSCG00000035738	0.0264891
ENSSSCG00000038552	0.0264638
RASGRP2	0.0264388
ENSSSCG00000010519	0.0264315
ENSSSCG00000012382	0.0263795
USF2	0.0263636
CPNE3	0.0263529
PAFAH1B3	0.0263292
ZNHIT6	0.0263119
UBE2L6	0.0263029
MEX3D	0.0262588
DDX46	0.0262586
ATP6V1E1	0.0262585
ELOVL1	0.0262568
RASA3	0.0262469
DAPL1	0.0262463
RNF8	0.0262452
RUVBL2	0.0262424
TMEM11	0.0262409
PTPN7	0.0262311
C1orf35	0.0262253
RPP25	0.0262092
DRG2	0.0262057
NOP10	0.0261839
RBX1	0.0261772
SH3GLB1	0.026123
AURKB	0.0261121
SDF2	0.0261093
SOD1	0.0260805
NFATC2	0.0260568
TMX1	0.0260387
PTGR1	0.0260371
DHX15	0.0260238
RFXANK	0.0260167
UQCC2	0.0260152
POLE4	0.0260009
ENSSSCG00000006363	0.0259414
HUS1	0.0259375
MRPL51	0.0259131
MED4	0.0259115
REX1BD	0.0258999
TRADD	0.0258949
RFK	0.0258792
SLC39A10	0.0258772
RRP9	0.0258743
GEMIN4	0.025871
TET2	0.0258657
TAF1D	0.0258436
LZTFL1	0.0258278
MGMT	0.0257865
ENSSSCG00000032311	0.0257753
CLIC5	0.0257667
MRPL37	0.0257605
EOMES	0.025716
TP53RK	0.0257143
DDT	0.0257065
TMED10	0.0256756
DPM1	0.0256536
RUSC1	0.0256335
RCN2	0.0256133
ENSSSCG00000011892	0.0255953
ME2	0.0255931
DFFA	0.0255898
ENSSSCG00000014280	0.0255844
STX12	0.0255631
SAR1B	0.0255177
MUL1	0.0255174
TMEM131	0.0255032
CRLF3	0.025493
BLOC1S1	0.0254919
SNW1	0.0253987
ENSSSCG00000031751	0.0253969
CEBPB	0.0253735
CD47	0.0253523
C9orf78	0.0253445
MIEN1	0.0253297
BPHL	0.0253146
AHSA1	0.0253129
GUSB	0.0253065
ITGB1	0.025292
TMEM134	0.0252727
ENSSSCG00000007688	0.0252411
ELF1	0.0252126
CCNE2	0.0251857
DNTTIP1	0.0251725
ABHD17B	0.0251451
SFPQ	0.025143
MOB1A	0.0251294
ENSSSCG00000009788	0.0251263
MSL1	0.0251262
ENSSSCG00000003035	0.0251258
LRR1	0.0251067
ENSSSCG00000005663	0.0250985
MRPL2	0.0250736
SLC4A1AP	0.0250388
MAT2A	0.025024
EIF2D	0.0249986
ZPBP2	0.0249745
ENSSSCG00000013596	0.0249544
CPSF6	0.0249296
MRPL52	0.024905
CCDC34	0.0249002
CDC73	0.0248652
AP2A2	0.0248592
ZGRF1	0.0248578
SIPA1L1	0.0248329
ENSSSCG00000039833	0.0247954
UBXN11	0.0247933
ENSSSCG00000016990	0.0247681
CMBL	0.0247616
UBE2A	0.0247576
NSRP1	0.02474
DPP3	0.0247329
TPST2	0.0247094
ENSSSCG00000032978	0.0247079
TEDC2	0.0246995
MGST3	0.024695
CD8A	0.0246935
ENSSSCG00000039635	0.0246787
CHAC2	0.0246715
PPM1A	0.0246664
MRPL13	0.0246609
UGGT1	0.0246465
MAP2K2	0.0246404
CST7	0.0246228
DLAT	0.0246194
HADHB	0.0246073
MFF	0.0245842
ENSSSCG00000003772	0.0245625
LY6E	0.0245385
FLNB	0.024509
RNF114	0.0245034
SERPINI1	0.0244581
SDF4	0.0244451
DSP	0.0244451
HMGCR	0.0244342
RAD51AP1	0.0243855
PLEKHA2	0.0243731
TBPL1	0.0243501
ENSSSCG00000017940	0.0243494
SIKE1	0.0242951
GTPBP8	0.0242813
ENSSSCG00000016323	0.0242741
XRN2	0.0242719
C2orf76	0.0242557
CCDC32	0.0242399
RAB1A	0.0242306
PPHLN1	0.0242148
RBM19	0.0242139
FNTA	0.024153
DDX47	0.0241516
ENSSSCG00000023643	0.0241499
PRKCB	0.0241271
SERP1	0.0241057
TOMM40L	0.0240952
TOP2A	0.0240938
LRRFIP2	0.0240643
TPD52L2	0.0240617
ACADSB	0.0240178
IL10RB	0.0239995
CYFIP2	0.023995
SCAF8	0.0239884
CDK9	0.0239231
TRAPPC2	0.023883
SLC44A2	0.0238798
CNIH1	0.0238466
ATP5F1D	0.0238365
ESCO1	0.0238348
HADHA	0.0238146
FKBP5	0.0238044
MTA2	0.0237565
COMMD6	0.0237368
LIPA	0.0237253
CSTF2	0.0236948
IRF2BP2	0.023692
ENSSSCG00000027907	0.0236624
ENSSSCG00000016464	0.0236554
ENSSSCG00000038825	0.0236534
NPB	0.0236511
EIF3B	0.0236455
FNIP2	0.0236408
CEP78	0.0236357
ENSSSCG00000035894	0.0236334
CFLAR	0.023582
MRPL20	0.0235806
LAT2	0.0235764
ENSSSCG00000031774	0.0235672
PTPN6	0.0235332
TPD52L1	0.0235277
IL6ST	0.0235154
POGLUT1	0.023491
MNDA	0.0234705
PNPLA6	0.0234564
SELP	0.023449
ZFAND5	0.0234306
LONRF3	0.0234135
EAPP	0.0233902
ENSSSCG00000039056	0.0233895
ENSSSCG00000032556	0.0233821
SPOP	0.0233683
ENSSSCG00000038304	0.0233654
RBL1	0.0233371
PYCARD	0.0233269
BTBD11	0.0233135
AKAP8L	0.0232898
RABAC1	0.0232692
ENSSSCG00000008058	0.0232452
CELF1	0.0231553
SOD2	0.0231549
CA14	0.0230747
ARFGAP3	0.0230738
RIF1	0.0230386
GSPT2	0.023013
NIN	0.0229985
ZC3H12D	0.0229917
MBD4	0.0229898
CSTF3	0.0229605
STX10	0.0229593
MRPL17	0.0229581
FKBP11	0.0229448
ENSSSCG00000026498	0.0229303
COA3	0.0229187
DPYSL2	0.0228973
BLM	0.0228522
EPB41	0.0228441
STX8	0.0228321
PSMD11	0.0228309
SYNGR1	0.0228121
RIPK3	0.0228073
GSDMD	0.0227984
ENSSSCG00000021560	0.0227941
DOCK11	0.0227561
EXOSC4	0.02275
TAF2	0.0227103
EIF2AK1	0.0227099
DUSP7	0.0227092
MRPS18C	0.0227015
MARK2	0.0226701
CCNL1	0.022666
MESD	0.0226602
ENSSSCG00000009341	0.0226381
TOX	0.0226356
MRPS6	0.0226348
CCRL2	0.0226064
LIF	0.0225997
ETFA	0.0225983
USP16	0.0225928
ITGA2B	0.0225889
ARID4A	0.0225882
OXLD1	0.022586
ZBTB41	0.0225806
U2AF2	0.0225793
ACRBP	0.022573
MEA1	0.0225664
SUPT7L	0.0225657
EIF2B5	0.0225623
LAMP1	0.0224967
ENSSSCG00000012757	0.0224945
BFAR	0.0224891
ENSSSCG00000033132	0.0224858
AMBN	0.0224849
DNAJB1	0.0224805
ENSSSCG00000005040	0.022468
MRPL41	0.0224498
CSF1	0.0224459
ENSSSCG00000001038	0.0224436
ATP13A1	0.0224227
TAF9B	0.0224146
TAP1	0.0223846
MMADHC	0.0223721
DENND2D	0.0223691
TARS	0.0223688
PGAP1	0.0223632
OGA	0.022362
POLG	0.0223527
BTG2	0.022341
STRAP	0.0223227
INPP5B	0.0223083
ENSSSCG00000005658	0.0222896
ENSSSCG00000007947	0.0222888
JMY	0.0222884
CDCA2	0.0222758
CHAF1B	0.0222613
PPIF	0.0222608
KEAP1	0.0222497
ABHD2	0.022238
SYNCRIP	0.0222348
WDR45	0.0222067
NUP88	0.022194
PCBD2	0.022193
SLC25A38	0.0221881
JPT2	0.0221795
ENSSSCG00000031317	0.022151
ERMARD	0.0221424
ACOX1	0.0221317
ENSSSCG00000009792	0.0220944
UTP23	0.0220827
GDI1	0.0220596
[truncated: 12,388 more rows]

[truncated: 3 more sheets: 3v28_Permutation, 4v28_Impurity, 4v28_Permutation]
