# Supplementary material for: Reference transcriptomes of porcine peripheral immune cells created through bulk and single-cell RNA sequencing
Source: bioRxiv preprint, doi:10.1101/2021.04.02.438107, version 1 (2021-04-04)
Supplement: SuppFile13 [file 438107_file04.xlsx]

## Sheet: Error_rate
Supplementary File 13. Random forest analyses of CD4+ αβ T-cell clusters (0,3,4, and 28). The model represented below displays the parameters used and resulting OOB prediction error. Variable importance was assigned by measuring node impurity (Impurity) and using permutations (Permutation). Features that reduced error in predictive accuracy are ranked as more important.
Type: Classification
Number of trees: 500
Sample size: 5082
Number of independent variables: 14386
Mtry: 119
Target node size: 1
Variable importance mode: impurity
Splitrule: gini
OOB prediction error: 19.05 %

## Sheet: RF_Impurity_CD4
Supplementary File 13. Random forest analyses of CD4+ αβ T-cell clusters (0,3,4, and 28). The model represented below displays the parameters used and resulting OOB prediction error. Variable importance was assigned by measuring node impurity (Impurity) and using permutations (Permutation). Features that reduced error in predictive accuracy are ranked as more important.
Gene	Impurity
ENSSSCG00000036618	43.9747
TMSB10	39.9661
COX1	34.448
S100A6	32.6853
GPX1	30.3009
ENSSSCG00000037142	25.4461
RPS3A	23.8722
S100A11	23.5072
S100A4	20.0397
RPS16	19.4915
ENSSSCG00000034617	19.4694
ENSSSCG00000003042	19.4101
ITGB1	18.7669
COX2	18.6714
S100A10	18.4089
SRGN	16.0951
CCR7	15.9521
RPL35	15.7474
SAT1	15.3626
RPL34	15.1379
ENSSSCG00000011272	15.1375
UCP2	15.0381
RPL23	14.9979
HMGB2	14.5354
LTB	13.9678
CD74	13.2534
ENSSSCG00000003930	12.0748
ANXA2	11.894
HMGN2	11.6026
RPS27	11.4961
ENSSSCG00000014855	11.465
RPL9	11.1956
PCLAF	10.7977
ENSSSCG00000035768	10.7799
ENSSSCG00000040273	10.2474
ACTG1	10.1365
ENSSSCG00000004489	10.12
B2M	10.1145
RPL6	9.95942
H2AFZ	9.83729
CD99	9.63317
ENSSSCG00000026140	9.62177
PLAC8	9.4469
ARHGDIB	9.38809
COX3	9.35423
RPL11	8.93898
BIRC5	8.89789
ENSSSCG00000035080	8.84247
RPS5	8.57616
MYL6	8.21816
BTG1	8.18064
ENSSSCG00000039544	8.09035
STMN1	7.91073
ENSSSCG00000031088	7.76591
SELL	7.73179
ATP6	7.70627
VMP1	7.61908
ENSSSCG00000035811	7.58239
LGALS1	7.5766
RPL37	7.40861
HSD11B1L	7.34577
ENSSSCG00000001229	7.13952
RPL5	7.12239
RPL7	6.66538
SPC24	6.54108
RPS15	6.45013
ENSSSCG00000006395	6.43868
IL18R1	6.30862
SH3BGRL3	6.30727
BST2	6.16165
ENSSSCG00000014565	6.13513
OSTF1	6.08266
RPS13	6.05822
RPL22	6.04764
RPS23	5.86402
LEF1	5.7056
ACTB	5.56238
ENSSSCG00000009327	5.4865
TPX2	5.437
ENSSSCG00000025928	5.41149
HLA.DRA	5.34368
PFN1	5.21454
SAMHD1	5.17344
CST7	5.13416
DUT	5.02752
ENSSSCG00000014569	5.0203
ENSSSCG00000039071	5.01007
C15orf48	4.87273
ENSSSCG00000032556	4.7648
ISG20	4.74378
PABPC1	4.69577
LMNB1	4.67376
ENSSSCG00000001341	4.67176
ENSSSCG00000033019	4.66774
RDX	4.65869
ENSSSCG00000027573	4.65139
ENSSSCG00000013597	4.62815
ENSSSCG00000012119	4.57727
EML4	4.52772
ENSSSCG00000034448	4.49557
PTMA	4.46609
ENSSSCG00000016737	4.46252
CTSW	4.35694
TRAT1	4.26464
RPS9	4.24778
LSP1	4.19012
RPS14	4.17099
ENSSSCG00000004970	4.13506
ENSSSCG00000013064	4.11174
FABP3	4.06431
ENSSSCG00000020830	4.05181
CYTB	4.01916
ENSSSCG00000038507	3.9915
RPS11	3.98827
ENSSSCG00000011952	3.97737
HINT1	3.97386
ENSSSCG00000036350	3.97294
ND4	3.96921
ARF6	3.93968
ENSSSCG00000024974	3.90829
TSPO	3.89835
EEF1B2	3.87832
ENSSSCG00000004945	3.8697
LAPTM5	3.86164
TK1	3.81628
VIM	3.79396
RPL17.C18orf32	3.7287
ENSSSCG00000005453	3.72753
CALM1	3.69483
ARPC3	3.69231
ENSSSCG00000000576	3.68642
ENSSSCG00000017239	3.67829
RPS21	3.63515
RPS18	3.55093
RPLP0	3.54316
RPL10	3.52017
CD52	3.46556
TUBA1B	3.4635
RPL39	3.45135
TPT1	3.43536
ANGPT2	3.41983
CXCR3	3.40759
ENSSSCG00000001455	3.40514
IFI6	3.37734
ENSSSCG00000036716	3.31776
RGS10	3.27092
CENPA	3.21903
ENSSSCG00000024973	3.12794
RPS6	3.09833
MIF	3.09203
RPL7A	3.09197
SLA.DQB1	3.08824
ENSSSCG00000001456	3.06895
ENSSSCG00000038351	3.05764
CFL1	3.04552
ENSSSCG00000024776	3.03057
H2AFV	3.0287
TCF7	3.01331
ENSSSCG00000033697	3.01296
IKZF2	2.96764
GAPDH	2.94194
RPS4X	2.93119
ENSSSCG00000031741	2.89872
RAC2	2.89176
ENSSSCG00000036296	2.85191
ARPC2	2.8075
NUF2	2.79262
RACK1	2.78406
RPS17	2.77443
RPL3	2.75466
SUSD3	2.75389
ENSSSCG00000009303	2.74169
CD40LG	2.73832
MYO1F	2.72749
KXD1	2.71867
PTPRCAP	2.66818
DDX5	2.6628
ENSSSCG00000017032	2.66097
ENSSSCG00000037775	2.64758
RPLP2	2.62506
RAN	2.62375
ENSSSCG00000033721	2.59303
ENSSSCG00000028485	2.56026
FLNA	2.55132
ENSSSCG00000036013	2.54981
F2R	2.53964
COX8A	2.53754
ENSSSCG00000029596	2.53038
ENSSSCG00000006081	2.51275
NDFIP2	2.50341
ASF1B	2.49976
ENSSSCG00000035507	2.49789
ENSSSCG00000026302	2.49114
RPS20	2.47822
ENSSSCG00000008433	2.47582
RPS26	2.46926
CD69	2.44878
EIF4A2	2.41149
PSMB9	2.39495
ENSSSCG00000017509	2.39296
PLP2	2.3906
ENSSSCG00000008170	2.38942
ITM2B	2.36685
HSP90AA1	2.35038
ENSSSCG00000033734	2.34605
PLAAT3	2.33542
S100A13	2.3307
HIST1H2AG	2.3303
ENSSSCG00000039460	2.29252
H3F3A	2.29084
ENSSSCG00000035209	2.29043
ENSSSCG00000039740	2.27694
EVL	2.23975
HSPE1	2.23958
MCM4	2.22261
ENSSSCG00000031912	2.221
ENSSSCG00000003914	2.19825
TPM3	2.18652
CD8A	2.16871
PCNA	2.16421
CENPE	2.15758
ENSSSCG00000032003	2.14056
FTL	2.13564
IFITM3	2.13497
RPL26	2.12798
ITGA4	2.12683
ENSSSCG00000029830	2.12024
ND1	2.11248
ENSSSCG00000000657	2.11106
ENSSSCG00000013889	2.11037
KIFC1	2.09603
ENSSSCG00000033500	2.09155
VAMP8	2.08388
TMEM173	2.08293
OAZ1	2.08065
RPS12	2.07505
ENSSSCG00000025499	2.07403
ND2	2.06748
COX5B	2.06691
UBB	2.06542
COX7A2	2.0647
ENSSSCG00000016903	2.06261
ENSSSCG00000039046	2.03181
ENSSSCG00000026064	2.01317
ENSSSCG00000001398	2.00797
RPSA	1.99743
COX6C	1.99443
TYMS	1.97381
TUBB	1.97094
CORO1A	1.95815
RPS10.NUDT3	1.95746
ENSSSCG00000003691	1.9567
ENSSSCG00000037030	1.9524
GNB2	1.95191
CDC20	1.94032
CCR4	1.91239
RPL27	1.90184
ENSSSCG00000036114	1.90032
UBC	1.89734
HSP90AB1	1.88876
ENSSSCG00000033733	1.88276
PSMB8	1.87004
MYBL2	1.87004
NUCKS1	1.86679
ID2	1.86644
TMA7	1.8645
CLSPN	1.84575
HMGN3	1.84572
COX7B	1.84156
COX4I1	1.8308
ENSSSCG00000010203	1.82189
SNRPE	1.81849
NME2	1.81754
MRPS25	1.8165
H3F3B	1.81238
PARVG	1.81062
EIF1	1.79061
BTF3	1.78968
ANXA1	1.7888
DLGAP5	1.78411
ATP5F1E	1.76628
ENSSSCG00000014540	1.7514
MCM7	1.75079
CAPZA1	1.74845
HYPK	1.74381
IL6R	1.73419
NPM1	1.73205
LCP1	1.73083
CD3E	1.72756
ENSSSCG00000012961	1.72155
SMC2	1.71621
CD3G	1.70481
ENSSSCG00000035908	1.69741
GMFG	1.69239
RPA3	1.68345
CARD19	1.68054
COX17	1.67515
ENSSSCG00000018063	1.67341
SSR2	1.67148
PTPRC	1.66549
EEF1D	1.66457
MISP3	1.65971
HMMR	1.65353
COX6A1	1.6431
PARK7	1.64294
ARPC4	1.64137
RAP1A	1.63881
EMP3	1.6331
EEF2	1.62836
ENSSSCG00000034019	1.62581
RANBP1	1.62397
RPL36AL	1.61869
GABARAP	1.61432
GLIPR2	1.60717
SLC25A6	1.60593
CENPS	1.60412
EZR	1.60295
HSPA8	1.59986
ARPC5	1.59578
ENSSSCG00000006418	1.5878
ARPC5L	1.58483
ARHGDIA	1.58199
ENSSSCG00000008061	1.58129
TMEM123	1.56766
ENSSSCG00000015710	1.56715
CD247	1.56685
ATP5MC1	1.56406
ATRX	1.557
ENSSSCG00000013366	1.55407
EIF3K	1.55396
ENSSSCG00000002907	1.5538
CENPM	1.55369
HNRNPDL	1.55082
CTSC	1.54273
ENSSSCG00000013661	1.54256
ENSSSCG00000007188	1.53882
ENSSSCG00000004145	1.5337
RPL10A	1.53321
ARPC1B	1.53217
CD2	1.53203
GPR183	1.52818
COX7A2L	1.5269
ENO1	1.52495
BATF	1.52037
YWHAB	1.5175
ENSSSCG00000023331	1.51669
MCM5	1.50395
ENSSSCG00000023158	1.50175
ZFP36L2	1.49653
ENSSSCG00000012397	1.48566
PNISR	1.48363
ENSSSCG00000037885	1.4792
ATP5PF	1.47907
ENSSSCG00000034913	1.47709
CD63	1.47329
NTAN1	1.47196
EIF3E	1.46918
ECHS1	1.46772
ENSSSCG00000035520	1.46763
ENSSSCG00000040857	1.46244
SPCS3	1.45664
LY96	1.45371
SMAP1	1.45156
GSTA4	1.44837
ENSSSCG00000015337	1.447
UHRF1	1.44533
ENSSSCG00000020790	1.44184
ABLIM1	1.43912
SSR4	1.43218
LIMD2	1.42611
ENSSSCG00000035256	1.41896
CDK2AP2	1.41837
SMC4	1.41655
LSM2	1.41426
SOD1	1.41381
ETS1	1.41314
CAPG	1.41119
SERBP1	1.41039
DBI	1.39718
PNRC1	1.38935
UBE2D3	1.38916
ISG15	1.3844
SRSF5	1.38376
DYNLL1	1.37544
CAP1	1.37513
COTL1	1.37346
ITGB2	1.36985
DDX39A	1.36676
CALM3	1.35985
SUMO2	1.35882
CD9	1.35845
COX5A	1.35383
ENSSSCG00000007743	1.34973
WDR1	1.34615
SRSF2	1.34611
DYNLT3	1.34262
EMB	1.33899
TRMT112	1.3388
CD37	1.33841
TMEM258	1.32873
IFI30	1.3233
PSMB2	1.32051
TMEM50A	1.31573
ENSSSCG00000007088	1.31489
UNC119	1.31358
ENSSSCG00000003903	1.31218
ENSSSCG00000011234	1.3116
PTP4A2	1.30609
ENSSSCG00000039582	1.30593
NDUFS5	1.30414
GZMB	1.30381
HCST	1.30284
IL7R	1.30079
ATP5MC3	1.29873
ATP5F1A	1.29677
CKS1B	1.29446
ENSSSCG00000003520	1.29326
JAK1	1.29147
ENSSSCG00000017213	1.29096
ATP6V1G1	1.28252
AQP3	1.2709
FUNDC1	1.26871
MCM3	1.26527
PSIP1	1.26307
TPI1	1.25993
NDUFB7	1.25976
SKAP1	1.25836
COX7C	1.25494
2021-09-07	1.25023
GPX4	1.24891
CNBP	1.24855
ZNRF1	1.24212
LCK	1.24167
CAPZB	1.24057
ND3	1.23974
RTRAF	1.23764
ENSSSCG00000039581	1.23616
ENSSSCG00000002550	1.23385
SLC25A3	1.22811
ERH	1.22608
ENSSSCG00000000905	1.22569
MBNL1	1.22412
EIF4A1	1.22223
ENSSSCG00000015040	1.22042
NOP10	1.21909
ENSSSCG00000002004	1.21808
PSMA7	1.21348
NDUFA13	1.21039
MRPL57	1.20986
NOP53	1.20985
MICOS10	1.20852
PDK1	1.20414
GNG2	1.20338
CBX5	1.19939
KLF2	1.19928
ENSSSCG00000001779	1.19918
ENSSSCG00000016758	1.19647
CCNG1	1.19641
TUBB4B	1.19343
RCAN3	1.19183
PPP1CC	1.1911
REEP5	1.18394
SON	1.18245
VPS28	1.18027
ENSSSCG00000006061	1.179
ENSSSCG00000000071	1.17686
ENSSSCG00000009772	1.1708
HIST1H2AB	1.17036
ARL6IP1	1.16573
CENPN	1.16519
PKM	1.15589
S1PR1	1.1555
DNAJA1	1.15358
EIF3H	1.15328
GPSM3	1.15304
RGS19	1.15263
RALY	1.14836
SNRPD1	1.14785
SSB	1.14772
ADD3	1.14719
ENSSSCG00000027565	1.14557
KIF15	1.14469
ENSSSCG00000037602	1.14383
RHOA	1.14328
PSMB1	1.14137
PIMREG	1.13394
FADS3	1.13242
PSME1	1.12934
ND5	1.12928
ACTR2	1.12842
HNRNPM	1.12495
HNRNPK	1.12395
RORA	1.12341
LAT	1.12304
PNRC2	1.12186
ATP5PO	1.1183
POMP	1.11769
ENSSSCG00000004666	1.11767
ENSSSCG00000033744	1.11742
CNN2	1.1171
TRAF3IP3	1.11649
CENPF	1.11469
MDH1	1.11287
ENSSSCG00000034190	1.11205
YWHAZ	1.11148
SEC61B	1.10662
MNDA	1.10519
ENSSSCG00000000405	1.10451
ENSSSCG00000021591	1.10305
BZW1	1.10222
CD5	1.10082
ENSSSCG00000005656	1.09895
ATP5MC2	1.09261
ARHGAP15	1.09193
DDX17	1.09143
MAX	1.09092
ITGB7	1.08719
PPIB	1.08275
FKBP11	1.08238
ENSSSCG00000003253	1.08169
CD80	1.08021
ENSSSCG00000033909	1.07858
ATP5MD	1.07337
NAP1L1	1.07268
ENSSSCG00000024313	1.07258
ENSSSCG00000032166	1.06955
ENSSSCG00000014371	1.06839
IKZF3	1.06684
TMBIM6	1.06574
ANKRD12	1.06544
ENSSSCG00000016990	1.06352
NKG7	1.05863
ENSSSCG00000013992	1.05587
PLXND1	1.05537
2021-09-06	1.05496
ILF2	1.05272
ENSSSCG00000001396	1.0522
ARL6IP5	1.05194
LSM6	1.05186
EIF4B	1.05085
PSMA3	1.04594
ENSSSCG00000037081	1.04511
GRB2	1.0445
ENSSSCG00000001075	1.04174
ATP5IF1	1.04095
CDKN3	1.03943
SIT1	1.03838
ATP5PB	1.03591
ENSSSCG00000030295	1.03237
ENSSSCG00000034709	1.03161
ENSSSCG00000027826	1.03039
ISCU	1.03008
ENSSSCG00000014075	1.02917
CHD3	1.02744
STK17B	1.02654
ENSSSCG00000022912	1.02536
ENSSSCG00000040118	1.02533
RBM8A	1.02532
TMEM59	1.02512
CSTB	1.0242
SAP18	1.02417
CCNB2	1.02416
SNRPF	1.02329
TAF1D	1.01751
ENSSSCG00000024263	1.01577
RAP1B	1.01519
ENSSSCG00000016711	1.01322
HCLS1	1.01122
FYB1	1.00688
GZMK	1.00659
SELENOF	1.0051
C11orf58	1.00157
NDUFB10	1.00108
MCM6	1.00036
ENSSSCG00000034314	1.00034
SKP1	0.994875
NDUFC1	0.993919
CAMK4	0.993312
ENSSSCG00000038711	0.993006
UQCRQ	0.990376
GON7	0.989288
THYN1	0.988037
CFLAR	0.987066
PPP1R18	0.986706
SCML4	0.986441
2021-09-01	0.986201
ENSSSCG00000017555	0.980355
YWHAQ	0.979629
KRTCAP2	0.978517
ENSSSCG00000000273	0.975303
ENSSSCG00000033653	0.97318
NDUFB4	0.973065
ENSSSCG00000027196	0.97202
ATP5ME	0.971761
FAXDC2	0.971569
EZH2	0.970094
ESD	0.969676
SRI	0.964333
ARGLU1	0.963611
NANS	0.963135
ENSSSCG00000016263	0.963009
RHOG	0.96138
GADD45A	0.960823
SUMO1	0.957303
ENSSSCG00000014343	0.957102
VASP	0.956271
TPM4	0.953707
MSN	0.953299
SEC61G	0.953285
AP2S1	0.952499
ENSSSCG00000013315	0.951219
TXNDC17	0.949771
POLR1D	0.94976
SRSF7	0.949557
RNPS1	0.948938
SEC11A	0.946901
ENSSSCG00000001097	0.943764
TLE5	0.942702
ENSSSCG00000033068	0.94026
SF3B1	0.940123
DDOST	0.939897
BIN2	0.937715
SPCS1	0.935425
TGIF2.RAB5IF	0.934202
LAMTOR4	0.932482
PSMB6	0.931969
POLR2F	0.931821
ITM2C	0.9316
EIF2S2	0.931019
UBXN1	0.930897
ENSSSCG00000037595	0.929681
GABARAPL2	0.928637
ELOC	0.92822
NDUFB11	0.928176
DPY30	0.92766
POLE4	0.927415
MAP2K2	0.927201
EIF3I	0.926356
HNRNPC	0.924495
CIRBP	0.922993
SF3B6	0.921877
ENSSSCG00000034527	0.921654
ENSSSCG00000036096	0.920822
DDT	0.920088
SLC25A5	0.919983
VPS29	0.919742
NSD3	0.9191
BCAP31	0.91781
C12orf10	0.917417
PSMB3	0.91696
ACP1	0.916599
ENSSSCG00000036988	0.915501
CCND3	0.913636
ENSSSCG00000028479	0.91324
FUS	0.909899
CD81	0.909421
ENSSSCG00000014850	0.907814
PTBP3	0.90651
ENSSSCG00000004307	0.906488
PTPN18	0.903469
HSPB1	0.897465
CACYBP	0.896494
RNASEH2C	0.894551
ENSSSCG00000016262	0.892298
CD53	0.892027
BUD31	0.889807
LBR	0.88927
CAPZA2	0.887834
BRK1	0.887018
PRDX3	0.883837
AIMP1	0.88243
HELLS	0.878323
CCT2	0.877466
LEPROTL1	0.876798
ENSSSCG00000004414	0.875861
PSMB7	0.875269
UQCRC1	0.875215
SMDT1	0.874638
NMI	0.871551
SUCLG1	0.870464
MIEN1	0.868715
TWF2	0.867901
UBE2L6	0.867882
TRAPPC5	0.867674
TMPO	0.865513
KARS	0.865126
GNAI2	0.864774
RABAC1	0.864339
CENPW	0.863979
KHDRBS1	0.863339
STK4	0.86241
CSNK1A1	0.862236
RASGRP2	0.862086
EIF3D	0.861775
HNRNPU	0.860699
HNRNPD	0.85863
SAMD9	0.855271
SIVA1	0.852394
NDUFB9	0.852261
MYO1G	0.85052
CD3D	0.850302
CUTA	0.848908
FLT3LG	0.847924
DNMT1	0.847781
ENSSSCG00000012178	0.847433
CCT3	0.847168
MTDH	0.847117
SPTBN1	0.845483
SRRM2	0.844042
SMAD2	0.844027
LNPEP	0.84399
HIGD2A	0.843586
MCL1	0.838647
CDCA8	0.838643
TMEM160	0.838374
ENSSSCG00000006830	0.836928
PRRC2C	0.836658
ENSSSCG00000033212	0.835514
ANAPC16	0.833964
CD47	0.832546
EIF3L	0.831837
SF3B5	0.830814
PPP2CA	0.827405
ENSSSCG00000031773	0.826849
PRELID1	0.825449
CCNB1	0.825232
PNN	0.824698
UBL3	0.824584
HNRNPR	0.824134
WAS	0.822232
TAX1BP1	0.821351
SRSF10	0.821121
APBB1IP	0.820344
NDUFC2	0.819347
HNRNPH1	0.819292
CGGBP1	0.819014
MT3	0.818028
IDH2	0.817786
SLC9A3R1	0.816833
NDUFA1	0.81515
LAMTOR5	0.814468
GOLPH3L	0.814227
MAF	0.813797
NDUFB6	0.810896
RASA3	0.810104
NDUFS8	0.810041
ENSSSCG00000010158	0.807249
LSM3	0.80572
ENSSSCG00000029066	0.804738
CCNI	0.803971
ENSSSCG00000018061	0.803199
RAB2A	0.802543
SF3B2	0.802207
ENSSSCG00000023792	0.801733
SDF4	0.801701
UBXN11	0.799363
ENSSSCG00000004963	0.799229
ENSSSCG00000013596	0.798849
MPHOSPH8	0.798687
VAMP5	0.79846
RBM39	0.79833
UBE2B	0.796509
MGAT4A	0.79647
MXD3	0.794624
LMAN2	0.794221
ENSSSCG00000027746	0.794074
ATP5F1C	0.791629
ENSSSCG00000013721	0.791385
NEDD8	0.791197
POLR2E	0.790315
HNRNPH3	0.789089
PSMC3	0.788771
PAIP2	0.787996
ENSSSCG00000031897	0.787484
DUSP1	0.786672
ZFP36	0.7865
RBX1	0.786275
ATP6V1E1	0.786125
SERPINF1	0.785278
CSK	0.784173
ATP6V0B	0.783986
CCL5	0.78242
RESF1	0.781968
SNRPC	0.780868
ENSSSCG00000032060	0.780705
HSPD1	0.778617
CTSS	0.778508
TBCA	0.778499
ENSSSCG00000004446	0.777714
SH2D1A	0.777335
ENSSSCG00000003261	0.776623
ENSSSCG00000021560	0.775729
UQCC2	0.774721
CDKN2AIPNL	0.774319
STK38	0.773669
ARID4B	0.772734
AHI1	0.77245
PRDX6	0.772219
MAP3K1	0.771831
HSH2D	0.770613
ENSSSCG00000000097	0.770459
EPSTI1	0.770372
LSM8	0.769608
CRLF3	0.769032
RPN1	0.768623
ST6GALNAC4	0.76815
RILPL2	0.767652
PSMB10	0.76674
STAT1	0.765677
ZNF367	0.765264
NOL7	0.76523
DAD1	0.76519
ENSSSCG00000007978	0.764694
CYTIP	0.761729
NDUFA10	0.760866
FAM49B	0.759601
ZRANB2	0.759315
ENSSSCG00000022176	0.757654
PSMA4	0.757441
ENSSSCG00000027348	0.757252
BIN1	0.757106
GPR174	0.756944
CCT5	0.755214
CCT4	0.755148
NDUFB8	0.75465
RSRC2	0.753713
PCBP2	0.751541
ENSSSCG00000009851	0.751462
LAMTOR2	0.751152
THOC7	0.75106
SNRPD3	0.749214
ENSSSCG00000014031	0.749176
FERMT3	0.748634
ENSSSCG00000032017	0.747243
ENSSSCG00000003849	0.746838
PRR7	0.74619
MGST3	0.746085
RPS19BP1	0.746026
PIK3R1	0.745972
KMT2E	0.745972
REX1BD	0.745355
GPI	0.745144
CKS2	0.744572
ENSSSCG00000038364	0.743767
GUK1	0.743508
SRP14	0.743284
CLINT1	0.743253
CD48	0.743026
DDX46	0.742238
PVRIG	0.742225
ENSSSCG00000010954	0.739552
MAD2L1	0.73795
ALG13	0.737894
ARHGAP30	0.737761
GLRX3	0.737116
PRMT1	0.737111
ENSSSCG00000000365	0.735627
IQGAP1	0.735434
BIRC3	0.735343
FCGRT	0.734928
SYNGR2	0.733414
TSC22D4	0.733303
SNF8	0.732832
KIF11	0.732216
SNX3	0.731991
ENSSSCG00000036658	0.731918
RBBP4	0.731576
HBB	0.731571
ENSSSCG00000035728	0.731306
SYF2	0.728862
PDCD5	0.727857
ENSSSCG00000020777	0.727714
NDUFS7	0.727479
ENSSSCG00000007688	0.727269
NCL	0.726277
DHX9	0.72547
SFT2D1	0.723972
SELENOT	0.723897
TNFAIP8	0.722708
NDUFV2	0.722661
ZC3HAV1	0.722296
EWSR1	0.721492
TRAM1	0.721461
PDCD10	0.721065
GATA3	0.720956
ACOT13	0.720694
SCAF11	0.720254
OCIAD1	0.719932
EIF4G2	0.719581
MALT1	0.718544
ZNF277	0.717775
ENSSSCG00000010674	0.713864
RAD21	0.713452
DAPL1	0.713218
SRRM1	0.712633
RBMX	0.711521
ENSSSCG00000011764	0.710678
CALR	0.710052
FUNDC2	0.70887
ARF4	0.706501
PSMA6	0.705478
RGCC	0.705173
ENSSSCG00000013436	0.701991
SEC11C	0.70147
ZAP70	0.701151
ENSSSCG00000038444	0.700706
EDF1	0.70063
TCF19	0.699283
ENSSSCG00000012166	0.69926
ENSSSCG00000034868	0.698397
PAK2	0.697592
SLA.DMA	0.697554
IFI44L	0.697346
SEC62	0.697018
RAB5A	0.696959
ICOS	0.696872
TMEM9B	0.696726
ANKRD10	0.695488
ENSSSCG00000009145	0.695113
FAM32A	0.69487
ENSSSCG00000009625	0.694718
EIF6	0.69247
UQCR10	0.69236
PRPF40A	0.69191
ENSSSCG00000016100	0.69017
RFC4	0.689134
FNBP4	0.688946
SSR3	0.688906
ENSSSCG00000010320	0.68867
HMOX2	0.688157
CHRAC1	0.687139
TSPAN5	0.686937
ENSSSCG00000028663	0.682945
ENSSSCG00000001038	0.682786
GCHFR	0.681133
2021-09-09	0.680073
ZBTB32	0.679751
ATP6V1F	0.67962
NDFIP1	0.679519
ENSSSCG00000035869	0.677747
ENSSSCG00000010517	0.676923
SHKBP1	0.67687
CALCOCO2	0.676563
CYCS	0.675848
SASH3	0.674363
RRAGC	0.674203
MORF4L1	0.674187
UTRN	0.673824
SUCLG2	0.673791
M6PR	0.672645
PSMB4	0.672385
SMC3	0.671928
G3BP1	0.671472
ENSSSCG00000037143	0.671015
TUBA4A	0.670402
ENSSSCG00000010795	0.670346
CD86	0.670331
ENSSSCG00000017928	0.670042
SMCHD1	0.670037
PPP4R3B	0.66987
FLI1	0.669539
ENSSSCG00000039706	0.6695
THRAP3	0.669191
PRDX2	0.669177
TGFB1	0.668653
TKT	0.668573
ENSSSCG00000015447	0.668012
POLR2I	0.667505
TCEA1	0.667393
LAG3	0.667382
HM13	0.667077
BCCIP	0.666629
ENSSSCG00000037071	0.665385
PFDN1	0.664797
ENSSSCG00000000377	0.663578
UBE2V1	0.663098
ENSSSCG00000039249	0.662756
SLC44A2	0.66169
GNAI3	0.661532
CDC123	0.661419
FKBP5	0.661265
SNU13	0.660316
PPP1CA	0.660179
GPD1	0.659764
ABI1	0.659705
GDI2	0.658903
MRPS15	0.658076
TOMM7	0.657771
CETN3	0.656931
TSC22D3	0.656663
ORC1	0.656362
RTF1	0.655965
EPB41	0.655778
HNRNPLL	0.655119
MEAF6	0.654061
SNRK	0.654028
ELAVL1	0.653302
POLR2G	0.653298
EMC6	0.651629
ENSSSCG00000039658	0.651343
ENSSSCG00000013052	0.651276
CCNL1	0.648085
TRA2B	0.647753
STARD4	0.647488
IFIT1	0.646802
ENSSSCG00000035538	0.64677
SELENOH	0.645835
COPS6	0.64575
ENSSSCG00000040248	0.645669
EIF1B	0.645338
NCK1	0.644919
GLUD1	0.644319
NOP56	0.642471
ENSSSCG00000007355	0.642313
ELF1	0.641873
RNF181	0.64169
SERP1	0.640573
PFDN4	0.640009
TMED9	0.63981
DNAJC8	0.639042
NDUFA6	0.637713
ENSSSCG00000027840	0.637493
RALBP1	0.637038
EIF5B	0.636836
SH3KBP1	0.636775
LMO4	0.636625
CFDP1	0.636607
NDUFB2	0.636317
TALDO1	0.636221
BCLAF1	0.636073
RNH1	0.634584
CIR1	0.632806
NUB1	0.631456
ENSSSCG00000012517	0.631318
DDX39B	0.629613
EIF1AX	0.62951
ACP5	0.629399
GPBP1	0.628713
ENSSSCG00000013720	0.628033
LRCH4	0.627994
IK	0.627137
STXBP2	0.626722
RPL7L1	0.624838
SH3BGRL	0.623564
ENSSSCG00000011117	0.62179
CHD2	0.621368
PSAP	0.62107
CELF1	0.620855
CYBA	0.619838
SARAF	0.61965
MAP1LC3B	0.619378
NBN	0.618983
SP110	0.618382
HSPA5	0.618343
CLTA	0.61818
CCT7	0.616562
LAX1	0.61493
ENSSSCG00000038359	0.614719
BAX	0.614371
CYB5B	0.614308
POLR2K	0.614151
CREBZF	0.613664
SDHD	0.613443
EIF2S1	0.612807
SETX	0.610816
C6orf62	0.610617
ENSSSCG00000001696	0.610357
FLOT1	0.609291
ATF4	0.608371
CTSH	0.608338
CTSA	0.608334
HMGN4	0.608188
RALA	0.607793
POLR2D	0.607093
PRKAR1A	0.606685
RASSF1	0.604681
TIMM8B	0.60451
TP53	0.604383
TNFRSF1B	0.603889
FGD3	0.603285
MRPL20	0.603022
UBE2C	0.602881
PPP1CB	0.602607
ROMO1	0.602081
RCSD1	0.602055
ANAPC13	0.60171
CD38	0.601631
TM2D1	0.600198
CHMP4B	0.599162
CSRP1	0.598999
SHISA5	0.598734
TBC1D20	0.597971
SS18L2	0.597937
ENSSSCG00000037869	0.597782
SPAG8	0.597122
MAD2L2	0.597003
NUP50	0.596357
ENSSSCG00000031152	0.596158
LRP10	0.595337
HDAC2	0.595316
SRPK1	0.595227
RPL26L1	0.595161
ENSSSCG00000005768	0.594805
TAPBP	0.594712
MRPL55	0.594428
RSBN1L	0.593369
RBM42	0.592588
IRF2	0.591662
BCAS4	0.5916
WDR61	0.590431
ENSSSCG00000027675	0.589412
RER1	0.589311
SARNP	0.588325
ENSSSCG00000014267	0.586438
BLOC1S1	0.585977
LAPTM4A	0.585801
DBNL	0.585352
SMARCE1	0.585195
PRKCSH	0.584648
TMEM156	0.584552
SUPT4H1	0.58439
CEBPB	0.584226
ENSSSCG00000011121	0.583443
RCN2	0.583139
LXN	0.582999
RASSF5	0.582432
UCHL5	0.582259
ENSSSCG00000016226	0.582239
SRP19	0.580906
NDUFA11	0.580817
ACAP1	0.580358
SDCBP	0.580072
TBC1D10C	0.580058
NAA20	0.57966
NONO	0.579183
STOML2	0.579183
CDC5L	0.579063
TPR	0.578047
ENSSSCG00000033272	0.57783
PSENEN	0.577307
SNRPN	0.576955
ENSSSCG00000000663	0.576655
ENSSSCG00000035048	0.575185
PLGRKT	0.575157
ILK	0.575036
BOLA3	0.574928
EIF4H	0.574059
ENSSSCG00000013878	0.573818
PSMD2	0.573571
ERP44	0.573423
SGO1	0.57291
ENSSSCG00000001505	0.572702
MYO5A	0.572535
CDC42SE2	0.571198
DDX21	0.570935
ENSSSCG00000031117	0.570659
CCDC50	0.570303
SMARCB1	0.569862
RPIA	0.569761
TMEM134	0.569738
PAXX	0.569552
ENSSSCG00000001414	0.56926
RHOC	0.56762
C20orf27	0.567142
SIGIRR	0.566651
GHITM	0.566467
SRSF6	0.565845
MRPL9	0.564336
SH3GLB1	0.563042
RNF149	0.562673
MTFR2	0.562512
LSM14A	0.561619
MFAP1	0.561061
RTF2	0.560567
RAB7A	0.560494
RNASEH2B	0.559882
RNF4	0.559569
CENPU	0.559351
MOB1A	0.55933
BUD23	0.558708
MAT2B	0.558154
ENSSSCG00000029857	0.558142
ZNHIT1	0.558102
BTG2	0.558087
ENSSSCG00000003211	0.557812
CCPG1	0.557617
THOC2	0.557577
ENSSSCG00000011290	0.556585
ENSSSCG00000011676	0.555675
COMT	0.555643
RASGRP1	0.555475
PDCD4	0.555405
ENSSSCG00000000697	0.555385
DAZAP2	0.554292
ENSSSCG00000010104	0.553814
ENSA	0.553364
ADH5	0.55308
TMEM71	0.552333
CD6	0.551978
TXNIP	0.551965
LDLRAP1	0.551766
ENSSSCG00000027085	0.551525
NUDT21	0.550674
CTSD	0.550155
LBH	0.549514
AKAP7	0.548521
TAOK3	0.54834
NAA38	0.547418
LSM7	0.547355
STXBP3	0.547343
PSMD14	0.54723
FOXN3	0.546938
TAP1	0.546724
SPOCK2	0.545988
RSU1	0.545384
ENSSSCG00000040782	0.544963
ENSSSCG00000038989	0.544808
DDIT4	0.544375
PFDN2	0.544262
ETHE1	0.544157
SLIRP	0.543046
UBE2D2	0.542886
ENSSSCG00000033757	0.542859
SNX6	0.542767
RNF7	0.542469
ENSSSCG00000003885	0.542399
YTHDC1	0.542257
CDKN1B	0.542081
ENSSSCG00000031580	0.542022
U2SURP	0.540096
MRPL12	0.539443
LAMTOR1	0.539363
RCHY1	0.539216
ENSSSCG00000036491	0.538414
CD4	0.537905
TCF25	0.537326
ZNF292	0.537112
BAG1	0.536838
PHB2	0.536433
PDLIM7	0.536316
ENSSSCG00000027790	0.534878
ENSSSCG00000005436	0.534421
MRPL17	0.534283
ENSSSCG00000021738	0.534069
ZC3H15	0.53373
CSDE1	0.533369
PHF5A	0.533034
HP1BP3	0.532988
PABPN1	0.53297
ENSSSCG00000012757	0.532725
RPN2	0.532642
APOBEC3B	0.532289
RAP2B	0.532001
RSRP1	0.530832
NDC80	0.530662
ENSSSCG00000002505	0.53036
KDELR1	0.53013
TMCO1	0.530125
ERBIN	0.529798
CYC1	0.529583
ENSSSCG00000012916	0.52939
TSTA3	0.528951
SMIM7	0.528467
SMC6	0.528251
SDHB	0.528116
ERAP2	0.527856
ATP6V0C	0.52778
YWHAH	0.52742
RSAD2	0.52666
EIF3A	0.526617
RNF19A	0.526465
HIKESHI	0.526343
NDUFS4	0.526199
JARID2	0.526125
RHEB	0.525945
ENSSSCG00000006919	0.525375
OPTN	0.525202
SNRNP25	0.52489
TMED5	0.524304
CDC37	0.524149
TCP1	0.524021
TXK	0.523885
SMARCA5	0.523421
TNRC6B	0.523301
ENSSSCG00000016323	0.522529
RBM38	0.521498
ENSSSCG00000027907	0.521002
ARHGAP4	0.519299
TRIM22	0.51886
SNRPA1	0.518112
VDAC3	0.517386
MDH2	0.517284
ORC6	0.516974
TIMM13	0.516968
SGO2	0.516769
ENSSSCG00000006628	0.516637
SPG21	0.516451
DDX6	0.516058
PLEKHA1	0.515788
UFD1	0.515531
ATF7IP	0.514816
GLIPR1	0.514785
PRKACB	0.514572
IL10RA	0.514161
MAP4K1	0.513764
UQCRC2	0.51361
CAMTA2	0.512922
STRAP	0.512541
CCDC34	0.512265
CDK4	0.511477
TMED4	0.51103
RFC2	0.510594
ENSSSCG00000028397	0.510476
IVNS1ABP	0.510361
AKAP9	0.510354
NRBP1	0.50869
MCRIP1	0.508662
DYNLRB1	0.508348
CD44	0.508011
FKBP3	0.50799
PSMC6	0.50783
KIF22	0.507611
BCAP29	0.50743
FAM104A	0.507341
SKA2	0.507286
ZNF207	0.507028
EIF2A	0.506375
C19orf53	0.506296
ENSSSCG00000005518	0.505359
MCM10	0.50535
SAFB	0.505003
RAB24	0.504901
ENSSSCG00000002259	0.504545
MRPL11	0.504429
ZFP36L1	0.504349
TVP23C	0.503784
SGCA	0.502801
MX2	0.502499
RAB5C	0.502355
PLSCR3	0.501809
RNF10	0.501281
OXA1L	0.500662
RSL24D1	0.500625
SARS	0.500394
SSH1	0.500258
CWF19L2	0.500125
HSPA9	0.499229
CINP	0.499128
SSR1	0.498715
ARL4C	0.498386
LGALS3BP	0.498289
TOX	0.497581
ENSSSCG00000036483	0.497412
PGK1	0.49724
CCT8	0.496029
FH	0.495989
NUDC	0.494207
SSRP1	0.494015
YBX3	0.49382
PSMD13	0.49372
ENSSSCG00000017626	0.493256
PTBP1	0.493246
UQCC3	0.493064
HDGF	0.492962
GM2A	0.492889
ENSSSCG00000003348	0.490606
CAST	0.489878
RASAL3	0.489398
CISH	0.489109
UBE2G1	0.48886
PIP4K2A	0.488809
ENSSSCG00000004583	0.488777
CHD1	0.488576
LARP7	0.488343
STK26	0.488058
TES	0.487565
GNA15	0.487531
ANXA11	0.487262
CCAR1	0.487239
ENSSSCG00000007253	0.48719
RAC1	0.486669
TAGAP	0.486589
FAM210B	0.486344
C12orf57	0.485852
TMUB1	0.485697
ARRB2	0.485361
EEF1AKMT1	0.484939
GRK6	0.484324
RRP15	0.483928
RNPEP	0.483926
ENSSSCG00000012811	0.483645
ENSSSCG00000004415	0.4834
SEC13	0.482571
ENSSSCG00000028097	0.48257
MRPL40	0.482109
TMEM50B	0.481995
SCAND1	0.480729
CBFB	0.479398
SLC25A24	0.47811
ATXN7L3B	0.478086
ARFGAP3	0.477749
IRF5	0.477747
HMGA1	0.477602
FAM89A	0.477196
AURKAIP1	0.477006
ENSSSCG00000034129	0.476614
SDF2L1	0.476554
CIAO2B	0.475978
ME2	0.475969
ENSSSCG00000009788	0.47595
CNOT7	0.475941
ENSSSCG00000014618	0.475894
NIPBL	0.475779
CRIPT	0.475747
NPC2	0.475606
VCL	0.475316
ROCK1	0.475217
SNW1	0.474888
ENSSSCG00000016475	0.474606
EAPP	0.474495
PDIA3	0.474116
DOCK11	0.472994
MAT2A	0.472813
DERL1	0.472794
PHB	0.472396
SAFB2	0.47224
SFPQ	0.472097
PSMC4	0.47199
LAT2	0.471918
LASP1	0.471325
BRD2	0.470361
TLN1	0.470225
PDIA6	0.470212
PRPF4B	0.470068
C12orf75	0.469985
CAPN1	0.469106
IPO11	0.468942
YKT6	0.468796
TXNDC15	0.468291
NME1	0.468165
METAP2	0.467991
AIP	0.467569
GINS2	0.467278
TXN2	0.467204
GPS1	0.467047
OTUB1	0.467042
YPEL3	0.467025
MICOS13	0.466954
PUF60	0.466799
VPS4B	0.465973
EMD	0.464488
SRPK2	0.463854
RFXANK	0.463621
MAGT1	0.463574
PSMC5	0.463418
KRAS	0.463135
PDAP1	0.46309
KIF5B	0.462322
ENSSSCG00000025593	0.462118
HDAC1	0.462001
MFNG	0.461752
ERP29	0.461543
FMNL1	0.460873
ARID1A	0.460715
TMEM154	0.460686
MRPL24	0.460533
ENSSSCG00000008677	0.460308
ELMO1	0.460069
MRPL34	0.459918
LAMP1	0.459907
TUT7	0.459838
E2F2	0.45978
SMARCA2	0.459583
ENSSSCG00000001063	0.459137
NASP	0.458795
STAG2	0.458614
KCNAB2	0.458526
TRAPPC2L	0.458425
CHIC2	0.458385
SUGT1	0.458191
ATOX1	0.458092
POLE3	0.457924
MRPL41	0.45734
CDK9	0.457193
MOV10	0.457191
NUDT1	0.457161
KTN1	0.457147
ENSSSCG00000013155	0.457034
ACADVL	0.456942
GYG1	0.456893
CHURC1	0.456848
DDX18	0.456741
BBX	0.456685
BTF3L4	0.45653
ENSSSCG00000007749	0.456394
PTPN6	0.455639
DOCK8	0.455362
MRPL52	0.455288
ENSSSCG00000027491	0.455219
RIOK3	0.454305
PIGC	0.45399
GSN	0.453548
ENSSSCG00000023323	0.453167
GBP2	0.452964
NCBP2	0.452286
KPNB1	0.4522
ENSSSCG00000016970	0.452087
ENSSSCG00000015664	0.451712
ENSSSCG00000007609	0.451608
ENSSSCG00000010734	0.451564
BPTF	0.45136
ENSSSCG00000002449	0.450806
ITK	0.450777
ENSSSCG00000015499	0.450756
GOT2	0.450742
URI1	0.450502
MTA2	0.450428
ETFB	0.449761
COA3	0.448937
SETD2	0.44891
ENSSSCG00000007098	0.448558
KDM1B	0.448492
ARID5B	0.448314
ENSSSCG00000003771	0.448038
SRPRA	0.447298
TMEM263	0.446035
SLC39A10	0.445714
RBM4	0.44538
TBL1XR1	0.445104
TIMM17B	0.444871
AUP1	0.444825
ADI1	0.444615
REL	0.443185
IL6ST	0.443127
ENSSSCG00000025060	0.443081
REXO2	0.441953
MMADHC	0.44188
GYPC	0.441631
TNIP1	0.44137
ACSL5	0.440637
ABHD3	0.439675
TNFAIP3	0.439318
SYNCRIP	0.438885
CAPRIN1	0.438674
EVI2B	0.437936
PIN1	0.4372
PIGY	0.436132
ITSN2	0.435627
NDUFAF3	0.434741
IRF1	0.434644
CNDP2	0.434443
ENSSSCG00000014997	0.434394
EHD1	0.434376
YTHDF2	0.434361
CD84	0.434312
ARHGAP25	0.434306
CNP	0.434193
ACIN1	0.434153
CHTOP	0.434138
SLC38A2	0.434052
CHCHD1	0.433859
IDH3G	0.433788
DAZAP1	0.432905
MLF2	0.432898
DCTN3	0.432824
IL27RA	0.432582
ENSSSCG00000017165	0.432582
NEMF	0.432286
C18orf32	0.432077
BRWD1	0.432047
PPP2R5E	0.432039
AHSA1	0.43173
TUT4	0.431408
BUB3	0.431311
CDIPT	0.431051
CLK1	0.430945
IMP4	0.43085
ENSSSCG00000010685	0.430638
BNIP3L	0.430388
STRADB	0.430109
PFKP	0.429634
IRF7	0.42952
PPP6C	0.429124
KLF3	0.429017
EIF4EBP1	0.42845
NKTR	0.428232
MRPS12	0.428185
ILF3	0.428101
ARL6IP6	0.427971
SMIM19	0.427914
TM9SF2	0.427791
MFF	0.427735
KNSTRN	0.427212
CNOT6L	0.427062
NDUFA8	0.426789
MANF	0.426682
PRDX4	0.426447
ATG3	0.426041
MID1IP1	0.426002
ENSSSCG00000008990	0.425477
USP1	0.425385
MRPS24	0.424997
EMC3	0.424883
CUL1	0.424775
ESF1	0.424194
MRPS9	0.424192
JOSD2	0.424168
IL10RB	0.424071
AP1S1	0.423886
NFKBIB	0.423536
SLA2	0.423267
TAF11	0.422981
API5	0.42291
PDCD6	0.422864
STX8	0.42277
ENSSSCG00000031530	0.422016
RBM25	0.42186
UXT	0.42169
DR1	0.421306
COPS2	0.421004
ZC3H7A	0.420921
RAB11A	0.420804
EGLN3	0.42043
ADSS	0.420098
CWC15	0.41991
ENSSSCG00000009241	0.419668
HMCES	0.419662
BAZ1A	0.419553
PCMT1	0.419204
BZW2	0.419121
KIF2C	0.418958
ENSSSCG00000012654	0.418956
ENSSSCG00000033089	0.418887
TTC14	0.41866
ARID4A	0.418581
SMC1A	0.418526
ENSSSCG00000030478	0.41823
GPR171	0.417759
RFC1	0.41644
ENSSSCG00000022058	0.416419
LENG8	0.416334
PCF11	0.416149
COPS3	0.415734
ACSF2	0.415542
ENSSSCG00000020808	0.415483
ID3	0.415397
CYBC1	0.415338
CCDC25	0.415166
ENSSSCG00000007203	0.414929
SDF2	0.414151
PPIG	0.414069
FAM129A	0.41349
EIF4G3	0.413183
CUEDC2	0.412984
BRD4	0.412914
TERF2IP	0.412901
ATP2B1	0.412613
GADD45GIP1	0.41261
PAFAH1B1	0.412442
TRA2A	0.41229
ENSSSCG00000007944	0.41207
TMEM147	0.411873
CDCA7L	0.411787
MEA1	0.411514
APRT	0.41147
SREK1	0.411407
UCHL3	0.411379
ENSSSCG00000040396	0.411362
CCDC115	0.411317
ZC3H12D	0.410816
VPS25	0.410689
SLTM	0.410642
GDI1	0.410171
CPSF6	0.40991
SLU7	0.409808
EIF4A3	0.409689
RALGPS2	0.40948
HSD17B10	0.40892
GOLGA4	0.408176
MRPS26	0.407707
CLDND1	0.407188
NARS	0.406025
MAPK1IP1L	0.405882
RSL1D1	0.405279
FBL	0.405145
MYDGF	0.405108
FYN	0.40498
SMPD1	0.404743
TAB2	0.404103
CDC42SE1	0.403962
RAB11B	0.403753
CCS	0.403597
ENSSSCG00000007031	0.403587
R3HDM1	0.403339
PAFAH1B3	0.403234
SLC4A7	0.4032
RASSF4	0.403004
PQLC3	0.402888
ENSSSCG00000026488	0.402563
NOP58	0.402511
PPP2R5C	0.402478
YIPF5	0.402241
SYAP1	0.401902
MRPL21	0.401561
YPEL5	0.401551
CERS2	0.400875
CCDC69	0.400531
ENSSSCG00000009341	0.400425
DYRK2	0.400049
TMOD3	0.399097
ANXA7	0.398635
GOLGA7	0.398429
VAV1	0.398066
HERC6	0.397712
ENSSSCG00000015434	0.397649
ZKSCAN1	0.397413
MTPN	0.397407
LCN2	0.397389
VAPA	0.397143
DARS	0.397065
CDC26	0.396945
SRSF4	0.396887
ENSSSCG00000037299	0.396541
ARHGAP9	0.396502
MTCH1	0.396306
LYST	0.39613
NCKAP1L	0.39611
ZBTB18	0.395731
ENSSSCG00000039331	0.394936
CITED2	0.39459
PBDC1	0.394539
NAXE	0.394455
RPS6KA1	0.39442
CMAS	0.394015
GMNN	0.393365
NOLC1	0.39288
CD1D	0.392506
SPPL2A	0.392084
PEF1	0.392081
NCALD	0.39202
NDUFV1	0.391894
COX6A2	0.391669
YY1	0.391126
ENSSSCG00000000635	0.391045
ENSSSCG00000008183	0.391011
TOX4	0.39057
SPTAN1	0.39028
NAT9	0.390017
RAB10	0.39001
HSPH1	0.390001
ERGIC2	0.389907
CISD2	0.389518
DCUN1D5	0.389474
YBEY	0.389431
CCND2	0.389335
TXNL4A	0.389327
ENSSSCG00000016451	0.389244
CANX	0.389053
ENSSSCG00000034072	0.388603
CDC14A	0.38695
RBCK1	0.386686
FAM192A	0.38599
ENSSSCG00000013453	0.385814
UBQLN1	0.385792
CHCHD3	0.385728
ND6	0.385716
SPTLC2	0.385665
C21orf91	0.38561
OGA	0.385526
PDIA4	0.385461
KLHL15	0.385436
TSR3	0.38543
CEBPZOS	0.384598
TNNI2	0.384538
TXNL1	0.384506
RASA2	0.384478
STAT5B	0.384087
ENSSSCG00000004130	0.383932
SELENOP	0.383928
PRKCB	0.383547
WASF2	0.383244
TMED7	0.382877
MRPS33	0.382789
NSRP1	0.382528
GNB1	0.382483
RPA2	0.382468
LY6E	0.382075
ENSSSCG00000013650	0.381976
JMJD1C	0.381719
ASNA1	0.381322
MGMT	0.381109
REV1	0.381025
CDC45	0.380667
ENSSSCG00000033037	0.38042
MRPL38	0.380193
RAB18	0.37998
ENSSSCG00000014280	0.379962
YAF2	0.379493
PSTPIP1	0.379314
PKN1	0.379229
ZC3H14	0.379156
CARHSP1	0.379092
POGLUT1	0.378787
ENSSSCG00000006559	0.37878
CASTOR1	0.378602
PBRM1	0.378356
PIK3IP1	0.378316
PSMF1	0.377969
PRPF19	0.37778
ENSSSCG00000034927	0.377529
HNRNPH2	0.377494
ENSSSCG00000030300	0.377419
ENSSSCG00000006363	0.377175
DNAJC2	0.377115
ENSSSCG00000015814	0.377023
MAP4K2	0.376995
HIF1A	0.376968
ATP6AP2	0.376804
SLC25A36	0.376627
ZNF800	0.376283
HSBP1	0.376199
MED10	0.37567
PPM1A	0.375371
GTF2H5	0.374953
ENSSSCG00000007493	0.374722
VCP	0.374709
CDT1	0.374608
KDSR	0.37456
SUDS3	0.3743
MRPL22	0.374105
MAP2K3	0.373594
SETD5	0.373191
DNAJC19	0.372089
ARL2	0.37186
ZBTB38	0.371422
FLII	0.37134
THUMPD1	0.371322
ENSSSCG00000030002	0.371152
MPP1	0.371027
UGP2	0.370632
PI4K2B	0.370227
PTPN4	0.370188
USP15	0.370148
PIK3R5	0.370062
ESYT2	0.369704
RPP21	0.36966
BCAS2	0.36947
BID	0.36936
HSPA4	0.369209
SDHAF1	0.36909
FGFR1OP2	0.369065
ENSSSCG00000014094	0.369011
IRF2BP2	0.368724
ENSSSCG00000029577	0.368619
MAPRE2	0.36856
CTCF	0.367639
FBXO39	0.367603
CHMP5	0.367596
CDKN2C	0.367567
PPM1G	0.367484
ENSSSCG00000006324	0.367202
DERA	0.367181
GTF2B	0.367169
CPD	0.366649
CAT	0.366524
GSPT2	0.366322
SAR1B	0.366265
BBS7	0.366244
THUMPD3	0.366201
MVP	0.365875
RASSF3	0.365543
OTULINL	0.365511
RAB1B	0.365406
UBAP2L	0.365381
MFSD1	0.364971
SLC35B1	0.364956
PTP4A1	0.364883
CGAS	0.364603
DKC1	0.364424
HPF1	0.364397
ENSSSCG00000008383	0.363857
WASHC3	0.36377
NSMCE1	0.363636
RAB27A	0.363507
ENSSSCG00000011237	0.363368
WTAP	0.363279
TOB2	0.36316
U2AF2	0.362852
MOSPD3	0.362828
ENSSSCG00000005255	0.362697
CTSB	0.362434
KLF13	0.3624
ENSSSCG00000034896	0.361948
RTN4	0.361932
TASOR	0.361917
UBASH3A	0.36185
MCUB	0.361809
MPC2	0.361556
ENSSSCG00000012382	0.361532
KIF2A	0.361527
IFNAR1	0.361472
FXR1	0.361369
MPG	0.360768
DYNC1I2	0.360667
ENSSSCG00000030015	0.360451
MED4	0.360095
COMMD6	0.359917
ENSSSCG00000006665	0.35991
CNIH1	0.359604
RAB35	0.359247
COMMD1	0.358985
SERPINB1	0.358933
NPRL2	0.358805
NOSIP	0.35853
ILKAP	0.358335
CCSER2	0.358255
ENSSSCG00000039407	0.35824
TUBB2B	0.358219
NAXD	0.358159
PHACTR2	0.358121
USP47	0.358115
MMD	0.357941
ENSSSCG00000025007	0.357739
MPHOSPH6	0.35768
CYB561D2	0.357102
FDX1	0.356825
GCNT4	0.356777
PPP4R2	0.356426
DPM1	0.355773
TAPBPL	0.355664
ENSSSCG00000012403	0.355262
PAIP1	0.355097
MRPS18A	0.354413
CPPED1	0.354317
NDUFAF8	0.354265
SERPINB9	0.354223
LCP2	0.354191
RGS14	0.354062
HIST1H1D	0.35384
BRMS1	0.353219
NT5C	0.352976
ENSSSCG00000039635	0.352151
RHOH	0.352148
MRPL58	0.351382
ENSSSCG00000035650	0.351315
C3orf38	0.351225
POP7	0.350972
MYCBP2	0.35085
ENSSSCG00000028035	0.350028
BCL2A1	0.349667
GUSB	0.3492
SPTSSA	0.349022
RFC3	0.348906
ESCO1	0.348863
ENSSSCG00000035686	0.348838
STX10	0.348069
CTLA4	0.347979
WDR82	0.347861
NIPSNAP3B	0.347719
DDX42	0.347711
TRIM38	0.347346
RIDA	0.347323
MRPS18C	0.346946
ENSSSCG00000004349	0.3468
LFNG	0.346797
DOCK2	0.346795
MRPL43	0.346702
PXK	0.34667
UBXN4	0.346521
SRSF9	0.346211
SNX10	0.346151
IQGAP2	0.346105
SMIM20	0.345852
MAP7D1	0.345682
YIPF3	0.345532
ENSSSCG00000023595	0.34518
ENSSSCG00000017671	0.345171
UBAC2	0.345149
RUVBL1	0.3451
ATG5	0.345095
GRAP2	0.345031
RBBP7	0.344643
GSK3B	0.344534
DDX24	0.344345
MIS18A	0.3442
RASSF2	0.344142
PTTG1IP	0.343981
CHID1	0.343833
NDUFA9	0.343717
OGFOD2	0.343707
LYAR	0.343527
RAD23A	0.34352
ENSSSCG00000031169	0.343227
ELOF1	0.343169
HADHB	0.343145
GNLY	0.343072
NAPRT	0.342871
ENSSSCG00000032073	0.342838
[truncated: 12,388 more rows]

## Sheet: RF_Permutation_CD4
Supplementary File 13. Random forest analyses of CD4+ αβ T-cell clusters (0,3,4, and 28). The model represented below displays the parameters used and resulting OOB prediction error. Variable importance was assigned by measuring node impurity (Impurity) and using permutations (Permutation). Features that reduced error in predictive accuracy are ranked as more important.
Gene	Permutation
ENSSSCG00000036618	0.0125659
TMSB10	0.0102085
S100A6	0.00757616
GPX1	0.00725673
COX1	0.00717553
S100A11	0.00590064
ENSSSCG00000037142	0.00541299
RPS3A	0.00453259
ITGB1	0.00441898
S100A4	0.00381119
ENSSSCG00000034617	0.00369059
ENSSSCG00000003042	0.00363698
S100A10	0.00353654
RPS16	0.00351777
UCP2	0.00316365
CCR7	0.0031514
HMGB2	0.00311527
COX2	0.00309542
CD74	0.00286624
ANXA2	0.00284452
RPL34	0.00276896
SRGN	0.00268117
RPL35	0.00266696
LTB	0.00254972
PCLAF	0.00251654
RPL23	0.00246193
SAT1	0.00239218
ENSSSCG00000011272	0.00235708
CD99	0.0021809
ENSSSCG00000003930	0.00206323
RPS27	0.00198844
HMGN2	0.00195672
ACTG1	0.0018706
ENSSSCG00000040273	0.00177729
IL18R1	0.00168268
ENSSSCG00000014855	0.00166498
RPL9	0.00164985
ENSSSCG00000035768	0.00164562
ENSSSCG00000035080	0.00161385
COX3	0.0015928
ENSSSCG00000026140	0.00153967
ENSSSCG00000004489	0.0015129
RPL11	0.00148398
H2AFZ	0.00147322
LGALS1	0.00146369
STMN1	0.00144028
BST2	0.00139672
BIRC5	0.00138894
RPL6	0.00137027
B2M	0.00131485
ISG20	0.00129056
VMP1	0.00128053
ATP6	0.00127389
ARHGDIB	0.00124191
BTG1	0.00113469
RPL37	0.00109989
PLAC8	0.00109493
MYL6	0.0010896
SELL	0.0010684
C15orf48	0.00103012
ENSSSCG00000031088	0.00102499
ENSSSCG00000006395	0.00102377
SPC24	0.00100379
ENSSSCG00000009327	0.000993705
DUT	0.000972292
ENSSSCG00000035811	0.000943353
HSD11B1L	0.000927696
ENSSSCG00000038351	0.000923418
RPS15	0.000919189
ENSSSCG00000039544	0.000918313
LEF1	0.000896558
OSTF1	0.00089326
ENSSSCG00000001229	0.000891005
CXCR3	0.000859652
CST7	0.000850308
HLA.DRA	0.000840571
RPL7	0.000831214
F2R	0.000787072
RPS13	0.000782288
RPL5	0.000773789
ENSSSCG00000039071	0.000740716
TPX2	0.000710153
RDX	0.000707284
ACTB	0.000668407
ENSSSCG00000014565	0.00066706
SAMHD1	0.000662438
RPS23	0.000656358
RPS5	0.00062576
LMNB1	0.000621396
MYO1F	0.000609556
IKZF2	0.000607996
ENSSSCG00000032556	0.000589614
SLA.DQB1	0.000583845
EML4	0.000555775
CCR4	0.000549286
SH3BGRL3	0.000545076
ENSSSCG00000025928	0.000542322
TRAT1	0.000539444
PABPC1	0.00053153
ENSSSCG00000001455	0.000530611
RPL22	0.000525329
PFN1	0.000523871
HINT1	0.000516136
ENSSSCG00000014569	0.00049801
VIM	0.000485341
ENSSSCG00000013597	0.000484799
IFI6	0.000481764
ANGPT2	0.000480534
RPL10	0.000464426
FABP3	0.000451248
CTSW	0.000443377
ENSSSCG00000034448	0.000442399
CD8A	0.000438666
ENSSSCG00000033019	0.000431863
TUBA1B	0.000428227
LSP1	0.000422403
ND4	0.000419884
ENSSSCG00000024973	0.0004146
ENSSSCG00000016737	0.000413974
ENSSSCG00000036350	0.000413636
CYTB	0.000409334
PTMA	0.000402346
ENSSSCG00000029596	0.000398222
ENSSSCG00000005453	0.000395754
ENSSSCG00000038507	0.000391471
ENSSSCG00000012119	0.000389947
ENSSSCG00000035507	0.000388544
FLNA	0.000385584
TPT1	0.000384802
H2AFV	0.000382394
TK1	0.000371797
ENSSSCG00000036013	0.000360698
RPS14	0.000353836
ENSSSCG00000003914	0.000353833
TMEM173	0.000349989
PLAAT3	0.00034834
ARF6	0.00034731
ENSSSCG00000036716	0.000345071
AQP3	0.000342966
CD9	0.000340206
ENSSSCG00000027573	0.000333802
ENSSSCG00000000576	0.000331152
TCF7	0.00032524
CD40LG	0.000322161
ENSSSCG00000004970	0.000320144
EEF1B2	0.00031857
ENSSSCG00000017239	0.000316692
RPS9	0.000306165
ENSSSCG00000001456	0.000306114
CENPA	0.000302168
ENSSSCG00000032003	0.000300371
RPS11	0.000297363
ENSSSCG00000020830	0.000297043
LAPTM5	0.000286929
TSPO	0.000286453
RPS6	0.000284034
ENSSSCG00000017032	0.000282852
ENSSSCG00000031741	0.00027811
ENSSSCG00000026064	0.000274787
ENSSSCG00000026302	0.000272036
CALM1	0.000267067
RPL17.C18orf32	0.000266893
RPS21	0.000266514
RGS10	0.000266217
ENSSSCG00000024776	0.000264102
RPL7A	0.000263942
ENSSSCG00000024974	0.000259584
TUBB	0.000257942
NDFIP2	0.000257436
ARPC3	0.000257243
PLXND1	0.000254945
GZMK	0.00025469
PLP2	0.000253424
TYMS	0.000253287
ASF1B	0.000251974
RAN	0.000251084
S100A13	0.000246322
ENSSSCG00000040857	0.000245999
ID2	0.00024329
ENSSSCG00000001341	0.000240809
CDC20	0.000239191
PTPRCAP	0.000238468
ITGA4	0.000237771
ENSSSCG00000035209	0.000236848
ENSSSCG00000016903	0.000233827
PCNA	0.00022921
RPLP0	0.00022776
ENSSSCG00000006081	0.000227674
KXD1	0.000224845
HSPE1	0.000222
ENSSSCG00000037775	0.000220202
MT3	0.000218418
RANBP1	0.00021782
MYBL2	0.000215339
ENSSSCG00000011952	0.000210714
ENSSSCG00000013064	0.000209742
GNB2	0.000207782
ENSSSCG00000008433	0.000205315
KIFC1	0.00020289
DLGAP5	0.000202208
SUSD3	0.000200886
COX7A2	0.000199316
ENSSSCG00000036296	0.000198458
MRPS25	0.000197922
NUCKS1	0.000197647
ENSSSCG00000002907	0.000195231
MAF	0.000192182
ENSSSCG00000035908	0.000191694
RPS4X	0.000191645
NUF2	0.000191616
MISP3	0.000191157
ARPC2	0.000189352
ENSSSCG00000007088	0.000189051
GSTA4	0.000187499
CD69	0.000185218
LSM2	0.000185169
CARD19	0.000184232
ENSSSCG00000025499	0.00018273
HIST1H2AG	0.000180999
ENSSSCG00000015447	0.000179437
CD80	0.000179066
ENSSSCG00000012961	0.000178425
PARVG	0.000177403
SNRPF	0.000177254
ANXA1	0.000177204
RACK1	0.000176731
PSMB9	0.0001758
ARPC4	0.000175778
SMC2	0.000175548
RPS18	0.000174296
MCM4	0.000173147
SNRPE	0.000172144
ENSSSCG00000011234	0.000172083
ENSSSCG00000000657	0.000171975
ENSSSCG00000028485	0.000171786
ENSSSCG00000031912	0.000171544
MIF	0.000168125
RAP1A	0.00016784
ZBTB32	0.000166241
ENSSSCG00000036114	0.00016621
ENSSSCG00000004945	0.00016587
ENSSSCG00000004666	0.000164559
GAPDH	0.000163592
ITM2B	0.00015941
DDX5	0.000158388
VAMP8	0.000158386
ENSSSCG00000018063	0.000152203
CENPE	0.000151429
ARPC5L	0.000151213
DYNLT3	0.000149604
RPL3	0.000148244
ENSSSCG00000008170	0.000147694
TMEM123	0.000147442
BATF	0.000146106
TPM3	0.000142705
RPA3	0.000140886
EMB	0.000140866
HMMR	0.000139391
FADS3	0.000135752
IL6R	0.000135321
ATP5MC3	0.000133685
ENSSSCG00000039740	0.000132643
GPR183	0.000130869
SMAP1	0.000129957
RPL26	0.000129772
RPL39	0.000129512
ENSSSCG00000009303	0.000128088
UHRF1	0.000126961
ISG15	0.000124908
CLSPN	0.00012451
CALM3	0.000124299
CAPG	0.000123009
LAG3	0.000120729
ENSSSCG00000023158	0.000120252
CD52	0.000117883
ENSSSCG00000035520	0.000117705
ENSSSCG00000033733	0.000117626
CCL5	0.000116984
MCM3	0.000116825
SMC4	0.000114467
NKG7	0.000114172
GADD45A	0.000113972
RPLP2	0.000113556
MCM7	0.000113245
CCNB2	0.000113227
EIF4A1	0.000113155
ENSSSCG00000034913	0.000112977
SNRPD1	0.000112802
RORA	0.00011143
RPS17	0.000111363
IFITM3	0.000111042
ENSSSCG00000002550	0.000110536
ENSSSCG00000006830	0.000110243
ENSSSCG00000006418	0.000110028
ENSSSCG00000033721	0.000109792
CENPM	0.000108742
CENPS	0.000107679
IKZF3	0.000107469
DYNLL1	0.00010676
ENSSSCG00000033734	0.000104737
HMGN3	0.000103462
ITM2C	0.00010142
CDK2AP2	9.93606e-05
PDK1	9.92672e-05
COX5B	9.77271e-05
CENPN	9.74325e-05
PIMREG	9.73982e-05
AHI1	9.73276e-05
ATRX	9.73262e-05
ENSSSCG00000030295	9.71641e-05
EVL	9.71531e-05
DDX39A	9.5869e-05
ENSSSCG00000000905	9.54189e-05
ZNRF1	9.41651e-05
ENSSSCG00000001779	9.35384e-05
ENSSSCG00000013366	9.30301e-05
ENSSSCG00000034019	9.27419e-05
KIF15	9.2075e-05
MCM5	9.18446e-05
HSP90AA1	9.07835e-05
TPI1	9.06516e-05
ENSSSCG00000039582	9.05219e-05
RPS20	9.01964e-05
ENSSSCG00000020777	9.00333e-05
IFI30	8.97293e-05
ENSSSCG00000037602	8.9648e-05
GLIPR2	8.95248e-05
PNRC1	8.77487e-05
HIST1H2AB	8.76241e-05
LSM6	8.74473e-05
COX8A	8.6384e-05
ENSSSCG00000010954	8.62067e-05
TMEM160	8.61393e-05
RCAN3	8.59274e-05
PSMA7	8.58142e-05
EZR	8.5723e-05
STK17B	8.53438e-05
LY96	8.53083e-05
SCML4	8.52251e-05
CDKN3	8.45005e-05
IL7R	8.44183e-05
ENSSSCG00000024313	8.41049e-05
TMA7	8.30342e-05
SUMO2	8.29664e-05
ENSSSCG00000032017	8.27095e-05
MDH1	8.22208e-05
ENSSSCG00000004307	8.20741e-05
CD48	8.14761e-05
ENSSSCG00000023331	8.09846e-05
ENSSSCG00000015337	8.07097e-05
REEP5	8.07004e-05
ECHS1	7.94446e-05
ENSSSCG00000016758	7.91612e-05
ENSSSCG00000012166	7.86446e-05
CBX5	7.78718e-05
CDCA8	7.75599e-05
ENSSSCG00000035256	7.72313e-05
KDM1B	7.70992e-05
EIF4A2	7.66501e-05
IRF5	7.63764e-05
ENSSSCG00000007188	7.58177e-05
CORO1A	7.56762e-05
POMP	7.44264e-05
DNMT1	7.35933e-05
GNAI2	7.22543e-05
MBNL1	7.22374e-05
MAX	7.20473e-05
RPS26	7.17033e-05
ENSSSCG00000003253	7.12189e-05
TUBB4B	7.11844e-05
ENSSSCG00000000071	7.07638e-05
HSP90AB1	7.06976e-05
ENSSSCG00000034314	7.0494e-05
CFL1	7.01841e-05
DUSP1	6.90595e-05
TCF19	6.9054e-05
CENPF	6.90473e-05
FAM129A	6.89422e-05
CKS1B	6.85566e-05
ENSSSCG00000030300	6.82886e-05
ERH	6.82199e-05
PSMB8	6.80127e-05
GON7	6.77553e-05
OAZ1	6.74833e-05
VCL	6.7479e-05
TPM4	6.73404e-05
RAC2	6.71343e-05
ENSSSCG00000032166	6.71255e-05
ND2	6.63317e-05
DBI	6.59421e-05
ENSSSCG00000001075	6.56671e-05
MCM6	6.52705e-05
NDUFB10	6.47846e-05
CLTA	6.42668e-05
TNFRSF1B	6.41554e-05
CAP1	6.37697e-05
SLC25A5	6.37475e-05
TMPO	6.31335e-05
TGIF2.RAB5IF	6.29116e-05
RPL10A	6.25748e-05
AP2S1	6.20906e-05
ENSSSCG00000033212	6.20578e-05
ABLIM1	6.20198e-05
KIF11	6.127e-05
COX6C	6.12427e-05
ENSSSCG00000003691	6.1187e-05
TWF2	6.11159e-05
PNISR	6.09845e-05
GOLPH3L	6.0939e-05
CHD3	6.08638e-05
SHKBP1	6.00439e-05
NANS	6.00382e-05
TMEM258	5.99667e-05
ETHE1	5.96475e-05
ENSSSCG00000010203	5.91826e-05
ENSSSCG00000001396	5.87553e-05
SPCS3	5.87342e-05
ENSSSCG00000033697	5.87037e-05
ENSSSCG00000012397	5.83382e-05
ENSSSCG00000003903	5.80143e-05
MNDA	5.79342e-05
ZNF367	5.78094e-05
YKT6	5.77245e-05
PSMB3	5.74896e-05
LSM8	5.73453e-05
ENSSSCG00000037071	5.68662e-05
TRMT112	5.68116e-05
ENSSSCG00000007743	5.66809e-05
ARHGDIA	5.60529e-05
LCP1	5.58253e-05
SKAP1	5.47606e-05
EMP3	5.43546e-05
MAP2K2	5.43004e-05
CCDC50	5.42873e-05
MAP3K1	5.42355e-05
ENSSSCG00000001398	5.38125e-05
ENSSSCG00000004414	5.38069e-05
CD86	5.37961e-05
HYPK	5.3694e-05
ST6GALNAC4	5.35555e-05
PRR7	5.35359e-05
YWHAZ	5.34678e-05
CTLA4	5.31347e-05
ARL6IP1	5.30755e-05
PKM	5.28793e-05
HCST	5.2802e-05
UBE2D3	5.27559e-05
TMEM50A	5.24074e-05
ENSSSCG00000017509	5.23391e-05
ENSSSCG00000009772	5.23088e-05
SIVA1	5.22734e-05
ENSSSCG00000027826	5.20783e-05
IDH2	5.20426e-05
CKS2	5.17852e-05
DDX17	5.13988e-05
RHOC	5.13873e-05
SGO1	5.13515e-05
GLRX3	5.12706e-05
CD2	5.12258e-05
NPM1	5.11245e-05
COX7C	5.08726e-05
NDUFB6	5.06673e-05
UBB	5.06437e-05
NMI	5.04297e-05
MTFR2	5.02612e-05
ENSSSCG00000013661	5.01742e-05
ND1	4.96196e-05
GZMB	4.96017e-05
ENSSSCG00000015664	4.93368e-05
SRSF10	4.93265e-05
DAD1	4.93223e-05
NDC80	4.88856e-05
ACTR2	4.88359e-05
ETS1	4.86419e-05
SRSF7	4.83684e-05
NDUFS7	4.826e-05
IL10RA	4.82344e-05
ENSSSCG00000037143	4.82028e-05
ENSSSCG00000001063	4.81899e-05
FUS	4.79533e-05
ENSSSCG00000006061	4.78146e-05
RPS12	4.73227e-05
ENSSSCG00000012517	4.7111e-05
PRDX2	4.68779e-05
PSMA6	4.68086e-05
ATP5MC1	4.67725e-05
BAX	4.61909e-05
CSNK1A1	4.60394e-05
SRPK1	4.58516e-05
PSIP1	4.58294e-05
ENSSSCG00000016263	4.57229e-05
ORC1	4.55195e-05
COX7B	4.53944e-05
ENSSSCG00000031117	4.52859e-05
BTF3	4.52359e-05
CDT1	4.5141e-05
ADD3	4.50762e-05
POLR2K	4.50513e-05
SSR1	4.5028e-05
LAMTOR2	4.49974e-05
LAX1	4.4948e-05
CD63	4.49264e-05
UBE2C	4.49113e-05
ABI1	4.48894e-05
LSM14A	4.42479e-05
H3F3B	4.40694e-05
ENSSSCG00000037869	4.39883e-05
BCAP31	4.39837e-05
GPI	4.39711e-05
ENSSSCG00000032060	4.39582e-05
IL6ST	4.37753e-05
COX17	4.36706e-05
SOD1	4.36696e-05
ENSSSCG00000000097	4.35938e-05
MYO1G	4.35531e-05
SON	4.35143e-05
ARL6IP5	4.34302e-05
HNRNPM	4.31645e-05
ND5	4.29645e-05
ENSSSCG00000012178	4.29307e-05
TXNDC17	4.28278e-05
SGO2	4.27954e-05
ZBTB38	4.2751e-05
ENSSSCG00000039460	4.27479e-05
GATA3	4.27409e-05
STK4	4.27299e-05
CHMP4B	4.26415e-05
PTBP3	4.26332e-05
LRCH4	4.25821e-05
HM13	4.25609e-05
MAP4K1	4.24127e-05
RBM8A	4.23162e-05
CACYBP	4.21302e-05
ENSSSCG00000016262	4.20949e-05
MAD2L1	4.20251e-05
UBXN1	4.18537e-05
ENSSSCG00000033909	4.18477e-05
M6PR	4.18199e-05
ENSSSCG00000035728	4.16673e-05
FLT3LG	4.16158e-05
EIF3K	4.15621e-05
ENSSSCG00000021560	4.14896e-05
GRB2	4.14017e-05
WDR1	4.1218e-05
NDUFB7	4.12065e-05
ILK	4.08201e-05
SELENOH	4.07907e-05
ENSSSCG00000038711	4.07229e-05
ENSSSCG00000000273	4.06685e-05
ATP6V1E1	4.05989e-05
ENSSSCG00000035538	4.05983e-05
ATP5PB	4.05256e-05
SSB	4.04715e-05
CENPU	4.03091e-05
YWHAQ	3.97767e-05
ENSSSCG00000014031	3.97513e-05
SRSF2	3.97433e-05
CD3E	3.97019e-05
RPL27	3.96511e-05
IFIT1	3.95437e-05
ATP5ME	3.95274e-05
TXNIP	3.9523e-05
CAPZB	3.95101e-05
PDLIM7	3.9308e-05
SLA.DMA	3.92307e-05
COX4I1	3.91924e-05
ARHGAP15	3.89682e-05
VPS28	3.89266e-05
CTSS	3.89129e-05
ATP6V0B	3.88882e-05
GMFG	3.8886e-05
CPPED1	3.87055e-05
GNA15	3.86195e-05
EZH2	3.85437e-05
ENSSSCG00000027348	3.85179e-05
ENSSSCG00000013992	3.8428e-05
MXD3	3.82298e-05
ANXA11	3.80249e-05
ENSSSCG00000036988	3.7543e-05
NBN	3.74649e-05
2021-09-06	3.74524e-05
HSBP1	3.74425e-05
ENSSSCG00000022176	3.74333e-05
ENSSSCG00000036658	3.73998e-05
ENSSSCG00000040782	3.73345e-05
ATP5IF1	3.73283e-05
KIF2C	3.66266e-05
DDOST	3.66217e-05
SKA2	3.66092e-05
CAMK4	3.65684e-05
CYBA	3.65646e-05
ARL4A	3.64688e-05
RSAD2	3.6423e-05
PARVB	3.63871e-05
SF3B6	3.63413e-05
HK3	3.62996e-05
ENSSSCG00000014075	3.62773e-05
UBC	3.60252e-05
SELENOT	3.55252e-05
ORC6	3.55076e-05
ENSSSCG00000009851	3.54986e-05
EIF4B	3.54659e-05
NTAN1	3.54616e-05
CCNB1	3.54242e-05
UQCRC1	3.53265e-05
SRP14	3.53148e-05
CENPW	3.52372e-05
SF3B2	3.51498e-05
THYN1	3.49154e-05
LCN2	3.4389e-05
CEBPZOS	3.43653e-05
CCT2	3.42842e-05
PRDX3	3.4247e-05
DHRS7	3.40046e-05
SH3GLB1	3.39175e-05
ELF1	3.38602e-05
RASA3	3.34724e-05
PCBP2	3.33926e-05
RBX1	3.30717e-05
SCAND1	3.30544e-05
CGA	3.30458e-05
ARPC5	3.30164e-05
RHOG	3.30011e-05
ENSSSCG00000016226	3.28847e-05
RFC4	3.28227e-05
ENSSSCG00000004145	3.28174e-05
ITGB7	3.24243e-05
UBXN11	3.23197e-05
DAPL1	3.22759e-05
ENSSSCG00000006919	3.22654e-05
ENSSSCG00000014371	3.22519e-05
EIF3I	3.22096e-05
HSH2D	3.21911e-05
ADAM19	3.21816e-05
TMEM134	3.21718e-05
BCAS4	3.21538e-05
RPL7L1	3.21065e-05
COX7A2L	3.19752e-05
PGK1	3.19639e-05
CCNL1	3.19571e-05
ENSSSCG00000016990	3.1929e-05
ENSSSCG00000000377	3.19126e-05
CDC45	3.17563e-05
UQCR10	3.15732e-05
LNPEP	3.14058e-05
MSN	3.13862e-05
BBS7	3.12851e-05
ENSSSCG00000039249	3.12801e-05
NME2	3.11824e-05
TCP1	3.11765e-05
ENSSSCG00000023323	3.11097e-05
MCM2	3.10956e-05
CD53	3.10955e-05
ENSSSCG00000015040	3.1077e-05
MCRIP1	3.10638e-05
EIF2S1	3.106e-05
SNRPC	3.10492e-05
ACP5	3.10357e-05
RNH1	3.1024e-05
ENSSSCG00000011290	3.09998e-05
RPSA	3.09871e-05
RPP21	3.09173e-05
ENSSSCG00000004556	3.09077e-05
PSMC4	3.08933e-05
CYB561D2	3.08653e-05
JOSD2	3.06443e-05
ENSSSCG00000007688	3.01788e-05
ENSSSCG00000037030	3.01539e-05
PLGRKT	3.01058e-05
ANXA5	3.00447e-05
DYRK2	3.00209e-05
BAD	2.99116e-05
CGGBP1	2.97938e-05
KLK7	2.97934e-05
RHEX	2.97897e-05
SMC3	2.97691e-05
SYF2	2.97273e-05
ENSSSCG00000008061	2.97018e-05
ARRB2	2.96369e-05
EPSTI1	2.96283e-05
ZFP36	2.95748e-05
PPIB	2.95436e-05
RPN1	2.9334e-05
ENSSSCG00000016711	2.90267e-05
ENSSSCG00000009625	2.899e-05
ENSSSCG00000027840	2.89806e-05
SGCA	2.89487e-05
ETFB	2.8945e-05
ENSSSCG00000000500	2.89048e-05
E2F2	2.88877e-05
PRDX6	2.88775e-05
CD81	2.88441e-05
CYTIP	2.88279e-05
KIF4A	2.8787e-05
IQGAP2	2.87742e-05
ENSSSCG00000010795	2.8761e-05
KRTCAP2	2.86811e-05
CAPRIN1	2.85786e-05
PSMB1	2.85218e-05
STARD4	2.83516e-05
SERBP1	2.82173e-05
MGAT4A	2.81993e-05
ENSSSCG00000039581	2.8193e-05
SRI	2.81797e-05
TSPAN5	2.79872e-05
ENSSSCG00000029066	2.79582e-05
RNF19A	2.7945e-05
ENSSSCG00000015499	2.79357e-05
PTPN4	2.79178e-05
BPGM	2.78849e-05
ARGLU1	2.78113e-05
ENSSSCG00000013650	2.77976e-05
ARFGAP1	2.7797e-05
RRAGC	2.7796e-05
POLR1D	2.77458e-05
RGS19	2.77155e-05
KMT2E	2.76758e-05
ADSS	2.76298e-05
ENSSSCG00000004583	2.76049e-05
TMEM71	2.75515e-05
SYNGR2	2.70291e-05
KCNAB2	2.70156e-05
CPD	2.69765e-05
FUNDC1	2.69566e-05
SEC62	2.68692e-05
RCHY1	2.68523e-05
DYNLRB1	2.68321e-05
TBC1D10C	2.68271e-05
HSPA5	2.68203e-05
RASSF2	2.67946e-05
MTDH	2.67514e-05
ENSSSCG00000036096	2.67426e-05
ERP44	2.67126e-05
RNASEH2B	2.67038e-05
CYB5B	2.66817e-05
PRKAR1A	2.66381e-05
ENSSSCG00000002449	2.66348e-05
HELLS	2.66194e-05
ENSSSCG00000016100	2.65968e-05
AOAH	2.65611e-05
RALGPS2	2.65444e-05
PDIA3	2.64873e-05
MICOS10	2.64098e-05
TMBIM6	2.63632e-05
CCNG1	2.63531e-05
POLR2G	2.62642e-05
ENSSSCG00000021591	2.61243e-05
SSR3	2.5961e-05
GUK1	2.58917e-05
MBNL3	2.58877e-05
ENSSSCG00000027790	2.58369e-05
DCAF8	2.58062e-05
CD3G	2.57963e-05
TAGAP	2.57849e-05
STRAP	2.57836e-05
ENSSSCG00000014618	2.57747e-05
MRPS12	2.57533e-05
MSH6	2.57455e-05
SLAMF7	2.57212e-05
PNRC2	2.56993e-05
STK39	2.56907e-05
RNPS1	2.56901e-05
CAST	2.56877e-05
ENSSSCG00000007493	2.56492e-05
SLIRP	2.56274e-05
PPP1CA	2.56257e-05
RCN2	2.55354e-05
RPS10.NUDT3	2.55314e-05
COX5A	2.55085e-05
SMC1A	2.54752e-05
COX6A1	2.51931e-05
CREB3L1	2.49251e-05
UBE2D2	2.489e-05
HTATIP2	2.48749e-05
ENSSSCG00000013878	2.47221e-05
ENSSSCG00000010214	2.46896e-05
ENSSSCG00000009208	2.46768e-05
NCAPG	2.46637e-05
PTPN6	2.46574e-05
EGLN3	2.46524e-05
JARID2	2.46343e-05
SAMD3	2.46117e-05
ENSSSCG00000006260	2.46077e-05
ILF3	2.45954e-05
MELK	2.45879e-05
SP110	2.45821e-05
HNRNPR	2.45679e-05
ENSSSCG00000040294	2.45669e-05
SSH1	2.45658e-05
RASGRP1	2.45635e-05
NEK2	2.45563e-05
HSPA9	2.45446e-05
GINS2	2.45261e-05
ENSSSCG00000027085	2.45225e-05
ENSSSCG00000005768	2.45107e-05
LIMD2	2.44926e-05
NAA38	2.44907e-05
FKBP11	2.44536e-05
SS18L2	2.44277e-05
PAIP2	2.44187e-05
MOV10	2.44108e-05
ENSSSCG00000033500	2.43906e-05
FYB1	2.43236e-05
DERL1	2.42878e-05
MRPL20	2.42689e-05
ND3	2.41594e-05
PPP1CC	2.4084e-05
CDK9	2.39017e-05
ENSSSCG00000039612	2.37132e-05
ANKRD10	2.36917e-05
SEC11A	2.36858e-05
CITED2	2.3683e-05
ARHGAP30	2.36825e-05
CAPZA1	2.36765e-05
NDUFB11	2.36587e-05
KIF22	2.35947e-05
NDUFA11	2.35637e-05
ENSSSCG00000034072	2.35522e-05
ACTN4	2.35036e-05
ENSSSCG00000028479	2.34917e-05
ELOC	2.349e-05
CCR2	2.34888e-05
UBE2T	2.34592e-05
USP1	2.34301e-05
ARHGAP25	2.34194e-05
MCM10	2.34139e-05
RAB2A	2.34105e-05
SPTBN1	2.3408e-05
IFI44L	2.33934e-05
ENSSSCG00000040827	2.33912e-05
HNRNPU	2.33722e-05
H3F3A	2.33001e-05
PCBD2	2.32875e-05
ENSSSCG00000013315	2.3235e-05
BUD31	2.30722e-05
PARK7	2.29306e-05
VASP	2.27551e-05
PFDN1	2.26566e-05
MIS18A	2.26377e-05
SKIL	2.26238e-05
ENSSSCG00000033703	2.26214e-05
CD38	2.26065e-05
RCSD1	2.26063e-05
EIF4EBP1	2.25966e-05
NRM	2.25684e-05
SH2D1A	2.25622e-05
EMD	2.25612e-05
PSMA4	2.25452e-05
EIF6	2.2545e-05
EDF1	2.25323e-05
TNFAIP3	2.25307e-05
EIF3D	2.24968e-05
ENSSSCG00000017670	2.24915e-05
CTSH	2.24717e-05
CLEC12A	2.24577e-05
RHOA	2.24549e-05
TPST2	2.2447e-05
UFD1	2.24154e-05
TGFB1	2.24124e-05
IDH3G	2.24122e-05
EFTUD2	2.23973e-05
ATP5F1A	2.23673e-05
ENSSSCG00000021738	2.23567e-05
DDX27	2.2308e-05
SYNCRIP	2.22877e-05
TNIP1	2.22662e-05
ARHGAP9	2.22557e-05
MANF	2.22436e-05
LAPTM4A	2.21787e-05
CSRP1	2.21344e-05
PIK3R1	2.20858e-05
SUCLG1	2.1687e-05
STK38	2.16689e-05
PRELID1	2.15689e-05
BNIP2	2.1538e-05
RBM42	2.14704e-05
FAS	2.14592e-05
NFKBIB	2.14523e-05
DHRS3	2.14455e-05
GMNN	2.14372e-05
FLI1	2.14232e-05
PPP2R5A	2.14167e-05
REL	2.14107e-05
MRPS11	2.13949e-05
SDHAF1	2.1376e-05
BAK1	2.13709e-05
STOML2	2.13463e-05
RILPL2	2.13324e-05
ENSSSCG00000027675	2.13212e-05
EIF5B	2.1317e-05
CDCA7	2.13137e-05
ACBD6	2.1312e-05
CAPNS1	2.12454e-05
ENSSSCG00000033757	2.12186e-05
PTTG1IP	2.12161e-05
IL2RA	2.11924e-05
DNAJA1	2.11893e-05
ICOS	2.11142e-05
PSMB2	2.10235e-05
HSPH1	2.06707e-05
ENSSSCG00000027746	2.05781e-05
NUDT21	2.0556e-05
DDX3X	2.05362e-05
ZKSCAN1	2.04473e-05
UCHL3	2.04106e-05
LAMTOR5	2.041e-05
RFC1	2.03979e-05
LRP10	2.03927e-05
CCNI	2.03723e-05
TLE5	2.03595e-05
ENSSSCG00000017754	2.03583e-05
RASSF5	2.03382e-05
TNRC6A	2.03322e-05
DPP4	2.03259e-05
U2AF2	2.03073e-05
CTSZ	2.03028e-05
TAC4	2.02869e-05
VPS36	2.02859e-05
WAS	2.0284e-05
ATP6AP1	2.02815e-05
DESI1	2.02627e-05
BPTF	2.02501e-05
BABAM2	2.02498e-05
CDK5RAP3	2.02415e-05
PDIA6	2.02366e-05
AKAP7	2.02318e-05
PRKCSH	2.02216e-05
MYO5A	2.02103e-05
UFM1	2.0176e-05
TMEM154	2.01565e-05
MRPL57	2.01076e-05
EEF2	2.00375e-05
ZNF277	1.96846e-05
KLF13	1.96729e-05
NDUFC1	1.96597e-05
AHR	1.95702e-05
ENSSSCG00000017165	1.95321e-05
NDUFS8	1.95206e-05
PHF3	1.94447e-05
EIF3A	1.93602e-05
ANXA7	1.93538e-05
FAXDC2	1.93395e-05
PTPN22	1.93219e-05
SERPINF1	1.93215e-05
ENSSSCG00000031730	1.93155e-05
SRRM2	1.93091e-05
SEC13	1.93015e-05
CDC14A	1.92998e-05
SDF2	1.92984e-05
ORAI1	1.92932e-05
HNRNPLL	1.9262e-05
LGALS3BP	1.92617e-05
TAF11	1.92557e-05
CYP51A1	1.92535e-05
ENSSSCG00000025593	1.92442e-05
RAB11A	1.92417e-05
CWF19L2	1.92409e-05
MFSD10	1.9237e-05
SETX	1.92357e-05
C1orf21	1.92357e-05
ENSSSCG00000033068	1.92349e-05
ND6	1.92313e-05
LDLRAP1	1.92277e-05
AUP1	1.92096e-05
SPTLC2	1.92056e-05
ACAP1	1.91949e-05
GNB1	1.91905e-05
PRPF4B	1.91885e-05
RIOK3	1.91861e-05
CCT4	1.91766e-05
NEMF	1.91539e-05
SNRPA1	1.91155e-05
ENSSSCG00000012757	1.91113e-05
RABAC1	1.90579e-05
CCPG1	1.90239e-05
ACOT13	1.89996e-05
ENSSSCG00000014343	1.89582e-05
TIPRL	1.89465e-05
ENSSSCG00000014540	1.88373e-05
SH3BGRL	1.8602e-05
DDX6	1.85528e-05
ENSSSCG00000004130	1.84443e-05
NKTR	1.83967e-05
SPPL2A	1.83809e-05
RRBP1	1.83711e-05
TUT4	1.83308e-05
SMIM20	1.8265e-05
C20orf27	1.82577e-05
MFSD6	1.82466e-05
ENSSSCG00000014267	1.82317e-05
NCOA1	1.82273e-05
FIP1L1	1.82195e-05
TIGIT	1.8211e-05
TM9SF2	1.82004e-05
RFXANK	1.81962e-05
TFRC	1.81919e-05
G3BP1	1.81876e-05
ZC3H12D	1.81795e-05
ENSSSCG00000005656	1.81782e-05
SPOCK2	1.81703e-05
ALG13	1.81643e-05
CHURC1	1.81488e-05
TFAM	1.81376e-05
NDUFV2	1.81336e-05
ENSSSCG00000007749	1.81304e-05
PRPSAP1	1.81091e-05
JMJD1C	1.81027e-05
ENSSSCG00000038719	1.81002e-05
PLSCR3	1.80861e-05
CLDND1	1.80835e-05
SERP1	1.80674e-05
TMEM165	1.80195e-05
SNF8	1.7998e-05
ENSSSCG00000006628	1.79752e-05
NCAPD2	1.79152e-05
TENT2	1.78977e-05
DDIT4	1.7863e-05
FKBP3	1.77333e-05
RTRAF	1.75455e-05
ENSSSCG00000033653	1.75327e-05
ENSSSCG00000029830	1.75132e-05
SARAF	1.74708e-05
PSMB6	1.74599e-05
RNF149	1.74435e-05
SUPT4H1	1.74083e-05
MAD2L2	1.73931e-05
PMPCB	1.7356e-05
CRLF3	1.73341e-05
ENSSSCG00000031169	1.7325e-05
SEC61A1	1.72829e-05
ENSSSCG00000040118	1.72586e-05
TIAM1	1.72579e-05
TMEM60	1.72569e-05
PSME3	1.72509e-05
SQLE	1.72416e-05
NT5C	1.72403e-05
COQ9	1.72353e-05
ERBIN	1.72325e-05
PPIL1	1.72291e-05
ID3	1.72266e-05
ENSSSCG00000003261	1.72157e-05
CEP164	1.72155e-05
ENSSSCG00000002898	1.72149e-05
PIGK	1.71967e-05
ENSSSCG00000008035	1.71796e-05
ZC3HAV1	1.71788e-05
PSAP	1.71781e-05
OGFOD2	1.71733e-05
PDCD1	1.71681e-05
AHCY	1.71466e-05
HDAC2	1.71418e-05
MGAT1	1.7129e-05
PDCD4	1.7124e-05
MRPL24	1.71234e-05
KAT2A	1.71191e-05
GMPR2	1.711e-05
GLUD1	1.71094e-05
ACSL5	1.70997e-05
ENSSSCG00000024696	1.70883e-05
FXR1	1.70481e-05
ZNF395	1.70472e-05
ZNF800	1.7044e-05
CENPC	1.70317e-05
TTC14	1.70239e-05
KIF20A	1.70094e-05
YTHDF2	1.69964e-05
KARS	1.69899e-05
DHX36	1.69844e-05
GANAB	1.69717e-05
MRPS15	1.69687e-05
HNRNPD	1.69452e-05
PSMA3	1.6714e-05
SF3B5	1.64839e-05
ITGB2	1.64803e-05
FBXO5	1.64556e-05
FAM32A	1.63561e-05
GPD1	1.63266e-05
PSMD14	1.62708e-05
EAPP	1.62505e-05
CGAS	1.62333e-05
NDFIP1	1.62206e-05
TOP2A	1.6197e-05
UNC119	1.61794e-05
DHRS11	1.61543e-05
ANKRD12	1.61504e-05
SERTAD1	1.61426e-05
LANCL1	1.61371e-05
ENSSSCG00000000635	1.61337e-05
CHRAC1	1.61044e-05
ENSSSCG00000026960	1.60973e-05
BIN1	1.6097e-05
MDFIC	1.60812e-05
VPS72	1.60803e-05
ENSSSCG00000037595	1.60793e-05
PEA15	1.60788e-05
SLC1A4	1.60748e-05
LMAN2	1.60717e-05
ENSSSCG00000008287	1.60618e-05
MFNG	1.60603e-05
PARP11	1.60559e-05
SLC4A7	1.60554e-05
GOT2	1.60443e-05
MTA2	1.60413e-05
KAT6B	1.60365e-05
SBNO1	1.60317e-05
ZC3H7A	1.60251e-05
CALHM6	1.60239e-05
HNRNPA3	1.60061e-05
CENPH	1.60012e-05
SMPD2	1.59985e-05
EWSR1	1.59977e-05
CAPZA2	1.59957e-05
APBB1IP	1.59905e-05
TWISTNB	1.59894e-05
ARID1A	1.59815e-05
SSR2	1.59796e-05
PXK	1.59775e-05
SUDS3	1.59744e-05
INPP4B	1.59705e-05
ENSSSCG00000039107	1.5949e-05
ERGIC3	1.5948e-05
ENSSSCG00000018061	1.59433e-05
PHF20	1.59367e-05
SDF4	1.59333e-05
GNAI3	1.5933e-05
TUBA4A	1.58921e-05
CUEDC2	1.58699e-05
TAP1	1.58621e-05
THOC2	1.58478e-05
GOLGA7	1.57955e-05
VAV1	1.57347e-05
LCK	1.57212e-05
SURF4	1.57031e-05
SND1	1.56983e-05
PFDN2	1.56714e-05
TXNDC9	1.52716e-05
IPO11	1.52581e-05
KMT2C	1.52371e-05
CHD7	1.51677e-05
RRP15	1.51482e-05
GMDS	1.51383e-05
ZBTB7B	1.51363e-05
PGM2	1.51328e-05
DBNL	1.51054e-05
ZC3H14	1.51035e-05
DCTN3	1.51022e-05
ZCRB1	1.50669e-05
SRSF4	1.50547e-05
NGDN	1.50535e-05
TMEM243	1.50489e-05
CIB1	1.50451e-05
BCL2A1	1.50432e-05
HES6	1.50357e-05
TERF2IP	1.50343e-05
NPRL2	1.50204e-05
VAPA	1.50157e-05
CDKN2C	1.50072e-05
SMAD2	1.49973e-05
MAP7D1	1.49971e-05
SERPINB9	1.49887e-05
PSPC1	1.49795e-05
CTDSPL2	1.4968e-05
NASP	1.49619e-05
ENSSSCG00000000365	1.49613e-05
TAB2	1.49555e-05
SERINC3	1.49544e-05
LAT	1.49471e-05
GATD1	1.49452e-05
PSME1	1.494e-05
ZBTB18	1.49275e-05
OSER1	1.49224e-05
CSDE1	1.49205e-05
ENSSSCG00000039046	1.49192e-05
SHISA5	1.49165e-05
CCDC167	1.49126e-05
SNRPD3	1.49125e-05
MRPL19	1.49023e-05
ENSSSCG00000036083	1.48986e-05
MRPS26	1.48873e-05
FCF1	1.48765e-05
TPR	1.4876e-05
GRSF1	1.4871e-05
ENSSSCG00000037187	1.48671e-05
KRAS	1.48644e-05
LMO4	1.482e-05
CHCHD1	1.47998e-05
PSMC3	1.47992e-05
TRIM22	1.47972e-05
LSM7	1.47776e-05
GHITM	1.47633e-05
SNX6	1.47531e-05
TFDP1	1.47522e-05
TAOK3	1.47447e-05
OTULINL	1.47263e-05
CALCOCO2	1.47073e-05
AIMP1	1.46683e-05
SMARCB1	1.46352e-05
MDH2	1.4624e-05
ENSSSCG00000004446	1.42955e-05
OCIAD1	1.4146e-05
CALR	1.41454e-05
ENSSSCG00000034190	1.41382e-05
ENSSSCG00000040586	1.41181e-05
TSSK4	1.40983e-05
ENSSSCG00000037364	1.40856e-05
CNEP1R1	1.4083e-05
POLR2M	1.40752e-05
AP1S1	1.40623e-05
ZNF827	1.40328e-05
HERPUD1	1.40322e-05
TXNL4A	1.40318e-05
COPS6	1.40257e-05
FGD3	1.40025e-05
COMMD5	1.3996e-05
TUBB2B	1.39817e-05
TMEM11	1.39688e-05
RTN4	1.39667e-05
LEPROTL1	1.39575e-05
CMPK2	1.39549e-05
SUPT16H	1.39519e-05
NONO	1.39498e-05
ENSSSCG00000035650	1.39424e-05
RHEB	1.39297e-05
BAZ1B	1.39284e-05
EIF2A	1.39257e-05
SEC63	1.39227e-05
TENT5C	1.3916e-05
ENSSSCG00000032459	1.39131e-05
NR3C1	1.39107e-05
RFC3	1.39089e-05
MRPL10	1.39033e-05
SLF1	1.38959e-05
DYRK1B	1.38803e-05
ARHGAP18	1.38769e-05
ENSSSCG00000036224	1.38694e-05
OSBPL8	1.38684e-05
DNAJC3	1.38677e-05
CCSAP	1.38522e-05
BECN1	1.38399e-05
RALA	1.38303e-05
FAM210B	1.38271e-05
POLDIP2	1.38208e-05
SNRK	1.38163e-05
NUDT9	1.38042e-05
SOWAHD	1.37963e-05
CDC42SE2	1.37897e-05
CBFB	1.37859e-05
PGRMC2	1.378e-05
ATP13A1	1.37426e-05
HP1BP3	1.3702e-05
BBX	1.37016e-05
PQLC3	1.36612e-05
WNK1	1.36518e-05
CAPN1	1.3621e-05
SAP18	1.35266e-05
TNFAIP8	1.34074e-05
MGST3	1.32569e-05
EIF1AX	1.32258e-05
UBE2L6	1.32161e-05
TM2D1	1.30986e-05
ZFP36L1	1.3062e-05
LRRFIP2	1.30553e-05
ENSSSCG00000013052	1.30349e-05
ENSSSCG00000013596	1.30222e-05
LYST	1.30058e-05
PPP2R2A	1.30035e-05
RAD51AP1	1.29989e-05
CPNE1	1.29948e-05
CREM	1.29904e-05
ARL6IP6	1.2989e-05
NFE2L2	1.29867e-05
HSD17B12	1.29651e-05
TVP23C	1.29624e-05
CTSA	1.29624e-05
GCNT4	1.29521e-05
CAT	1.29511e-05
IRF3	1.29301e-05
ENSSSCG00000013721	1.29224e-05
ELK1	1.29196e-05
PALM	1.29169e-05
TSNAX	1.29107e-05
ENSSSCG00000009341	1.29097e-05
ISCU	1.29075e-05
LHPP	1.28915e-05
REV1	1.28908e-05
SSBP1	1.28897e-05
NCF1	1.28839e-05
WDR26	1.28782e-05
LAMP1	1.2872e-05
PDCD1LG2	1.28696e-05
TADA2A	1.28663e-05
MAP3K5	1.28573e-05
C1orf43	1.28564e-05
SLC25A36	1.28521e-05
NAPA	1.28512e-05
ENSSSCG00000011798	1.28463e-05
RFESD	1.28396e-05
CCDC28A	1.28328e-05
MARK2	1.28299e-05
MRPS9	1.28268e-05
CHIC2	1.2823e-05
RAB8A	1.28167e-05
DLST	1.28108e-05
ZFP36L2	1.28087e-05
NOL7	1.28058e-05
ENSSSCG00000034129	1.28011e-05
AGO3	1.28005e-05
MND1	1.28e-05
NFIC	1.27982e-05
DOCK2	1.27958e-05
CHCHD6	1.2793e-05
RAB7A	1.27745e-05
PPM1A	1.27701e-05
SNAP29	1.27447e-05
TALDO1	1.27353e-05
RORC	1.27329e-05
TXK	1.27323e-05
CD3D	1.27316e-05
FOXN3	1.27205e-05
CYCS	1.27176e-05
TRIB2	1.271e-05
MRPL34	1.27014e-05
STRN3	1.26873e-05
PRMT2	1.26847e-05
SDHD	1.26783e-05
FMC1	1.267e-05
UBA1	1.26545e-05
TSC22D3	1.25912e-05
MATK	1.25889e-05
SCAF11	1.25881e-05
NDUFA1	1.2563e-05
CCT5	1.24349e-05
ITGAL	1.23985e-05
ENSSSCG00000017213	1.22111e-05
RSRC2	1.20403e-05
PTP4A2	1.20396e-05
GPN3	1.20083e-05
TBC1D10A	1.19807e-05
ANAPC16	1.19619e-05
PTPRC	1.19211e-05
AGTRAP	1.1914e-05
ENSSSCG00000035048	1.19098e-05
APMAP	1.19077e-05
CCDC69	1.19063e-05
NDUFB8	1.18982e-05
ATP5PO	1.18943e-05
ACSS1	1.18942e-05
CTDSP1	1.18941e-05
FBXW11	1.189e-05
CCNE2	1.18871e-05
SAMM50	1.18823e-05
FKBP4	1.18687e-05
EPC1	1.18564e-05
LMAN1	1.18544e-05
COMMD3	1.18523e-05
DTYMK	1.18509e-05
PBK	1.18483e-05
SF3B1	1.18463e-05
NUP54	1.18388e-05
CINP	1.18377e-05
SMIM7	1.18297e-05
LACTB2	1.18171e-05
PARP9	1.1815e-05
GPS1	1.18129e-05
MALT1	1.18086e-05
2021-03-02	1.18079e-05
DGKA	1.18078e-05
SBF1	1.18017e-05
TRA2B	1.17992e-05
PSMD1	1.17976e-05
ENSSSCG00000009770	1.17914e-05
MRPS33	1.17892e-05
KIF5B	1.17875e-05
UPF1	1.17841e-05
HMGN4	1.17775e-05
ENSSSCG00000030015	1.17774e-05
WTAP	1.17764e-05
TNFRSF1A	1.17757e-05
CCDC146	1.17733e-05
LY9	1.17721e-05
RAD51	1.17632e-05
SCAMP3	1.17579e-05
LYAR	1.17512e-05
TSN	1.17456e-05
SLC35A4	1.17371e-05
RBBP4	1.17337e-05
CHMP1A	1.17316e-05
RANGRF	1.17313e-05
STX11	1.17121e-05
PLEKHB2	1.17094e-05
SMC6	1.17068e-05
TIMM8B	1.17013e-05
ARID5B	1.16964e-05
SDCBP	1.16908e-05
SLC44A2	1.1689e-05
NCL	1.16861e-05
IFNAR1	1.16709e-05
TRAPPC4	1.16647e-05
ENSSSCG00000023160	1.16629e-05
UBE2V1	1.16621e-05
TANGO2	1.16498e-05
RASSF1	1.16427e-05
WDR76	1.16422e-05
DNAJB9	1.16381e-05
C21orf91	1.16372e-05
SLA2	1.16284e-05
NCALD	1.16271e-05
ENSSSCG00000007355	1.16263e-05
OPTN	1.16208e-05
SARNP	1.16038e-05
UQCRC2	1.16036e-05
PSMC5	1.15798e-05
BAG6	1.15687e-05
LY6E	1.15424e-05
SIT1	1.15254e-05
ENSSSCG00000031580	1.14042e-05
ATP5PF	1.14018e-05
APOBEC3B	1.11145e-05
ARL4C	1.10114e-05
PRPF40A	1.09962e-05
SEC61G	1.09659e-05
ENSSSCG00000001505	1.09609e-05
ROMO1	1.09104e-05
ENSSSCG00000003348	1.09083e-05
BRD4	1.08975e-05
PHACTR2	1.08807e-05
TMEM107	1.08692e-05
NIFK	1.08683e-05
UROS	1.08672e-05
TBCA	1.08643e-05
ENSSSCG00000006324	1.08612e-05
RASAL3	1.08537e-05
EPS15	1.08387e-05
CCDC85B	1.08385e-05
CCNB1IP1	1.08217e-05
TMED5	1.08164e-05
NRROS	1.08016e-05
PLEKHA2	1.07938e-05
RAB28	1.07866e-05
TP53I13	1.07845e-05
NSD1	1.07767e-05
ENSSSCG00000001097	1.07734e-05
ZFAND2B	1.07716e-05
ENSSSCG00000036229	1.07679e-05
ENSSSCG00000012997	1.07662e-05
STIP1	1.07637e-05
NCAPD3	1.07632e-05
DCPS	1.07572e-05
FDX1	1.07557e-05
GABARAPL2	1.0752e-05
WDFY1	1.07473e-05
ACSF2	1.07444e-05
TBC1D23	1.07406e-05
ZBTB16	1.07394e-05
METTL8	1.07365e-05
DHX16	1.07365e-05
MALSU1	1.07317e-05
CCDC186	1.07283e-05
RNF114	1.07275e-05
XBP1	1.07263e-05
RBM4	1.07234e-05
TMBIM1	1.0723e-05
ENSSSCG00000040801	1.07221e-05
DR1	1.07217e-05
CUL5	1.07195e-05
VPS26A	1.07195e-05
WRAP73	1.07194e-05
FGL2	1.07182e-05
PDE4B	1.07132e-05
ENSSSCG00000015011	1.07086e-05
LENG1	1.0707e-05
RNPEP	1.07021e-05
PARP12	1.06992e-05
SRRM1	1.06966e-05
CYB5A	1.06958e-05
MIA3	1.06949e-05
USF2	1.06927e-05
ENSSSCG00000031705	1.06879e-05
CALHM2	1.0685e-05
CADM4	1.06842e-05
PARN	1.06813e-05
FANCL	1.06812e-05
ENSSSCG00000014094	1.06799e-05
ST3GAL3	1.06793e-05
TBRG4	1.06755e-05
DPM2	1.06622e-05
CD44	1.06603e-05
GLIPR1	1.06586e-05
IFNG	1.06576e-05
CD247	1.06488e-05
USP8	1.06476e-05
HIST1H1D	1.06472e-05
FOXN2	1.06458e-05
ASPA	1.06454e-05
EIF4G2	1.06426e-05
ENSSSCG00000039551	1.06398e-05
SLC38A9	1.06381e-05
POLD3	1.06354e-05
CCR3	1.06314e-05
LPCAT2	1.06292e-05
POGLUT1	1.06287e-05
HSPA4L	1.06261e-05
GZMM	1.06171e-05
PDS5B	1.06135e-05
CBX6	1.061e-05
PHKG2	1.06085e-05
ENSSSCG00000008057	1.06085e-05
ENSSSCG00000016044	1.05802e-05
UBL3	1.05776e-05
R3HDM1	1.05739e-05
NOTCH2	1.05713e-05
ZC3H13	1.05588e-05
DDX1	1.05468e-05
PARP1	1.05431e-05
CD5	1.05382e-05
RCC2	1.05038e-05
POP4	1.05004e-05
ATP6V0C	1.04948e-05
STAMBPL1	1.04689e-05
SMPD1	1.04675e-05
ANAPC13	1.04204e-05
HNRNPDL	9.98913e-06
KLF2	9.96349e-06
EIF4A3	9.83945e-06
ENSSSCG00000003771	9.83144e-06
BID	9.81514e-06
FUNDC2	9.80658e-06
CCDC124	9.79346e-06
SLU7	9.79211e-06
OS9	9.78137e-06
SDHB	9.77364e-06
CISD2	9.7717e-06
NUP160	9.76857e-06
TAF9	9.76172e-06
UNG	9.74368e-06
KATNA1	9.74122e-06
KLF3	9.72913e-06
ENSSSCG00000020808	9.72754e-06
POLR2D	9.72606e-06
ARFGAP3	9.71975e-06
ENSSSCG00000035686	9.71272e-06
NAGA	9.70912e-06
STX8	9.70528e-06
DNASE2	9.70155e-06
TRAPPC2L	9.70118e-06
MAT2A	9.70057e-06
MRPL28	9.69895e-06
GDI2	9.69224e-06
WBP1	9.69196e-06
CRIPT	9.69041e-06
LTA4H	9.68865e-06
DKC1	9.68751e-06
PDE4D	9.68659e-06
DOHH	9.68525e-06
ENSSSCG00000007322	9.68324e-06
C17orf80	9.68323e-06
NOTCH1	9.6746e-06
TERF1	9.67365e-06
ENSSSCG00000027491	9.67163e-06
SNRNP25	9.67085e-06
NUDT1	9.67005e-06
IPO7	9.66987e-06
EMC8	9.66799e-06
KIAA2013	9.66546e-06
SATB1	9.66091e-06
DNLZ	9.66074e-06
ESF1	9.65947e-06
PPIL4	9.65756e-06
PQLC1	9.65576e-06
CHCHD10	9.64909e-06
CRYL1	9.6487e-06
ENSSSCG00000008222	9.6484e-06
AFF1	9.64749e-06
MX1	9.64693e-06
KDM2B	9.64534e-06
GTF2B	9.64508e-06
ENSSSCG00000022906	9.64322e-06
RNF146	9.64012e-06
EIF4E2	9.63861e-06
ENSSSCG00000039915	9.63849e-06
NOL8	9.63769e-06
FAM149B1	9.6343e-06
NOL9	9.63399e-06
RNF216	9.63357e-06
DNPEP	9.63316e-06
ENSSSCG00000026893	9.63289e-06
UPP1	9.62902e-06
AKR1B1	9.62733e-06
ACD	9.62622e-06
SLC30A5	9.62468e-06
NUP155	9.62389e-06
ARHGAP12	9.62148e-06
AKAP9	9.62071e-06
C2CD5	9.61633e-06
TBK1	9.61536e-06
PHIP	9.61483e-06
GTF3A	9.61342e-06
MRPL4	9.61327e-06
ADI1	9.6077e-06
MTG2	9.60746e-06
TOB2	9.60533e-06
ENSSSCG00000021427	9.60516e-06
SUPT6H	9.60335e-06
NCKAP1L	9.60323e-06
NCOA2	9.60234e-06
USP47	9.60221e-06
MTMR6	9.59973e-06
ENSSSCG00000002996	9.597e-06
GPATCH4	9.58662e-06
UNC45B	9.58638e-06
DEPDC1B	9.58583e-06
MED10	9.58551e-06
MRPS7	9.58373e-06
SYS1	9.5828e-06
SLC25A3	9.58187e-06
GTF3C1	9.57843e-06
IRF7	9.57813e-06
ARF3	9.57606e-06
WDR44	9.57556e-06
DICER1	9.57204e-06
NGRN	9.57179e-06
MAP1LC3B	9.57171e-06
FCN1	9.57156e-06
TBL1XR1	9.56845e-06
HEMK1	9.56779e-06
PFKL	9.56672e-06
MYNN	9.56193e-06
ENSSSCG00000037431	9.56109e-06
MRPL40	9.55367e-06
WRB	9.54607e-06
KPNA2	9.54125e-06
MAPK1IP1L	9.53664e-06
NELFE	9.52979e-06
PTGR1	9.52842e-06
CCM2	9.52008e-06
SLC39A10	9.51975e-06
GPN1	9.50894e-06
ENSSSCG00000028035	9.49788e-06
PITHD1	9.49293e-06
CIR1	9.47948e-06
EIF4EBP2	9.47448e-06
TXN2	9.4741e-06
NSRP1	9.472e-06
UBTF	9.4595e-06
UBL4A	9.448e-06
SAE1	9.4454e-06
ENSSSCG00000011117	9.374e-06
2021-09-07	9.23809e-06
API5	8.95963e-06
ENSSSCG00000031152	8.92276e-06
EEF1D	8.84405e-06
ENSSSCG00000002547	8.83086e-06
ELAVL1	8.77977e-06
TUT7	8.76734e-06
NDUFS3	8.73354e-06
SHOC2	8.71511e-06
RAP1GAP2	8.70492e-06
RASGRP2	8.70221e-06
RNPEPL1	8.70214e-06
MBD2	8.69836e-06
ENSSSCG00000007978	8.69402e-06
ENSSSCG00000020870	8.68088e-06
MIEN1	8.67986e-06
CCNH	8.67763e-06
AEN	8.67512e-06
LAMTOR3	8.66887e-06
TRAPPC11	8.66828e-06
TAPBP	8.6566e-06
ATG12	8.65444e-06
SEC61B	8.65272e-06
CLIP1	8.6504e-06
SNW1	8.64692e-06
FTSJ3	8.64318e-06
UBQLN2	8.64195e-06
SREK1	8.64144e-06
KEAP1	8.64064e-06
H6PD	8.63852e-06
HDAC3	8.63094e-06
NUB1	8.63062e-06
PIGX	8.62933e-06
FAR2	8.62759e-06
PIM1	8.62518e-06
POLE3	8.62378e-06
ENSSSCG00000023126	8.62333e-06
EIF2B2	8.62152e-06
POC1A	8.62054e-06
RAE1	8.62017e-06
ZBTB20	8.61942e-06
INPP5E	8.6194e-06
LEO1	8.61394e-06
TANK	8.60864e-06
TRMT1L	8.60783e-06
WDR75	8.6068e-06
CDPF1	8.60642e-06
COPZ1	8.60593e-06
ZFP30	8.60135e-06
B4GALT5	8.60068e-06
ENSSSCG00000011764	8.59724e-06
ENSSSCG00000017671	8.59499e-06
ZYX	8.5948e-06
PTGER2	8.59428e-06
ENSSSCG00000004415	8.59236e-06
PFKP	8.59176e-06
EPN1	8.59174e-06
ICMT	8.59058e-06
TTF2	8.59012e-06
UBE2S	8.58987e-06
CNIH1	8.58705e-06
SMDT1	8.58632e-06
PHLDB3	8.58572e-06
ENSSSCG00000038249	8.58354e-06
ZBTB40	8.58056e-06
TELO2	8.57737e-06
DOCK8	8.57445e-06
TSPAN13	8.57153e-06
2021-09-09	8.56999e-06
LYN	8.56699e-06
CNPY3	8.56678e-06
INPP5K	8.56537e-06
SUSD6	8.56519e-06
FNIP2	8.56518e-06
STIM1	8.56464e-06
TFDP2	8.5634e-06
LASP1	8.5631e-06
ENSSSCG00000010519	8.56271e-06
TMEM131	8.55943e-06
DHX40	8.5578e-06
CASC1	8.55693e-06
NELFB	8.55588e-06
LMBR1L	8.55412e-06
TRAFD1	8.55345e-06
LPAR6	8.55335e-06
ENSSSCG00000005738	8.55276e-06
GALK1	8.55158e-06
SQSTM1	8.54811e-06
ENSSSCG00000028695	8.5459e-06
ACTR10	8.54588e-06
AIDA	8.54427e-06
USP16	8.54381e-06
ENSSSCG00000009788	8.54095e-06
RGS14	8.53886e-06
ENSSSCG00000009692	8.53697e-06
ATXN7L3B	8.53445e-06
ENSSSCG00000003849	8.53088e-06
SLC25A40	8.53068e-06
VPS53	8.52829e-06
EOMES	8.52563e-06
SUPT3H	8.52552e-06
FAM53B	8.52447e-06
INPP5B	8.52444e-06
TMEM192	8.52308e-06
PSMD6	8.52199e-06
SLC35F2	8.51526e-06
RRP9	8.51427e-06
VCP	8.51318e-06
TRAPPC3	8.50686e-06
IKZF1	8.50672e-06
TXNDC11	8.50502e-06
ORAI3	8.50399e-06
ENSSSCG00000010301	8.50293e-06
GNL3L	8.50136e-06
TBC1D10B	8.50118e-06
DUSP4	8.49919e-06
TYW3	8.49641e-06
ENSSSCG00000029577	8.4951e-06
ENSSSCG00000007944	8.49391e-06
GLCE	8.49195e-06
ST3GAL4	8.49146e-06
ENSSSCG00000037565	8.4914e-06
GRAMD2B	8.48175e-06
OXR1	8.48144e-06
UBP1	8.48041e-06
NXT1	8.47887e-06
ENSSSCG00000008898	8.47571e-06
TSR3	8.47224e-06
TNNI2	8.46862e-06
SNRNP40	8.46451e-06
GNG2	8.46437e-06
RNF26	8.46271e-06
NFKBIA	8.46252e-06
TMEM9B	8.4608e-06
XPA	8.46004e-06
PTDSS1	8.45711e-06
EMC6	8.44753e-06
ENSSSCG00000001927	8.44664e-06
ENSSSCG00000033566	8.44208e-06
ACSF3	8.44047e-06
TTC39C	8.4354e-06
SGTA	8.43224e-06
RETREG2	8.42607e-06
CELF1	8.41939e-06
NIPSNAP3B	8.41467e-06
NDUFAF2	8.40496e-06
MFF	8.39283e-06
TOPORS	8.38382e-06
BUB1	8.3814e-06
LTO1	8.37001e-06
CHD1	8.36303e-06
SMIM19	8.35782e-06
FAM104A	8.29932e-06
TBX21	8.28784e-06
ENSSSCG00000020790	8.14338e-06
ENSSSCG00000039731	7.82846e-06
ZNHIT1	7.74284e-06
SCFD1	7.71524e-06
NAP1L1	7.70089e-06
ATP6V0D1	7.67326e-06
MRPL22	7.66911e-06
SYAP1	7.66544e-06
GORASP2	7.66308e-06
SUPT20H	7.64243e-06
COMMD2	7.63613e-06
MRPL21	7.63441e-06
RNF125	7.62955e-06
AKNA	7.62781e-06
BET1	7.62328e-06
GGA2	7.61798e-06
UBAC2	7.61094e-06
GRN	7.61008e-06
ENSSSCG00000032134	7.60782e-06
TRPS1	7.60239e-06
HGS	7.60045e-06
NOB1	7.59771e-06
PEX10	7.59703e-06
PTPN12	7.59048e-06
TBC1D20	7.58101e-06
SAFB2	7.57941e-06
HNRNPH1	7.57869e-06
ENSSSCG00000000663	7.57411e-06
DOCK11	7.57064e-06
ATP6V1C1	7.56573e-06
DDT	7.56487e-06
CNIH4	7.56092e-06
SAFB	7.56058e-06
ZFC3H1	7.56012e-06
FAM49A	7.55941e-06
MRPL44	7.55875e-06
TNFRSF4	7.55799e-06
POLD1	7.55665e-06
NREP	7.55354e-06
ENSSSCG00000035296	7.55228e-06
MRPL54	7.55203e-06
RUVBL1	7.54993e-06
ENSSSCG00000013492	7.54952e-06
ENSSSCG00000009239	7.54819e-06
ERI3	7.54621e-06
TMCO3	7.5413e-06
ENSSSCG00000040056	7.53877e-06
RNASEH2A	7.53604e-06
TCERG1	7.5338e-06
DLD	7.53138e-06
TAF13	7.53005e-06
FAAP24	7.52947e-06
ENSSSCG00000013568	7.5279e-06
GIGYF2	7.52741e-06
SMARCAD1	7.52541e-06
ASPM	7.52522e-06
TCP11L2	7.52514e-06
VPS4B	7.52315e-06
ZC3HC1	7.52151e-06
C12orf29	7.52107e-06
RAB31	7.5181e-06
MAP1LC3A	7.51765e-06
ENSSSCG00000023172	7.51599e-06
ENSSSCG00000016212	7.514e-06
TMEM101	7.51295e-06
CCDC32	7.51127e-06
SHCBP1	7.5106e-06
SOS1	7.5101e-06
EIF4G1	7.50996e-06
PRPF4	7.50863e-06
MOB1A	7.50852e-06
AUH	7.50738e-06
UGP2	7.5072e-06
CYTH2	7.50668e-06
STN1	7.50577e-06
ENSSSCG00000030122	7.50573e-06
DOT1L	7.50453e-06
PSMD5	7.50296e-06
PRPF19	7.50206e-06
TMEM147	7.49622e-06
RBM15	7.49589e-06
ERG28	7.49431e-06
B4GALNT1	7.49405e-06
ENSSSCG00000012984	7.49333e-06
RRAGB	7.49321e-06
CTBP1	7.49299e-06
RSBN1L	7.49269e-06
SF1	7.49113e-06
TRAPPC2	7.48593e-06
ENSSSCG00000027723	7.4825e-06
PPP1R35	7.48015e-06
CHID1	7.47701e-06
ENSSSCG00000027974	7.47431e-06
MTRR	7.47366e-06
ENSSSCG00000016679	7.4734e-06
SIGMAR1	7.47284e-06
PPP1R15A	7.47166e-06
TGS1	7.47032e-06
NARS	7.47011e-06
PPP1R11	7.4683e-06
GALK2	7.46751e-06
P2RY11	7.46657e-06
ENSSSCG00000003772	7.46641e-06
RIDA	7.46591e-06
PKN1	7.46489e-06
ANKHD1	7.46131e-06
ENSSSCG00000027229	7.46113e-06
DCAF12	7.46089e-06
DNAJC1	7.46002e-06
HSPA13	7.45951e-06
GOT1	7.45368e-06
C16orf91	7.45245e-06
ENSSSCG00000005518	7.45148e-06
URM1	7.45074e-06
RLBP1	7.45072e-06
SLC26A6	7.44996e-06
DXO	7.44853e-06
NAGK	7.44654e-06
NSMCE4A	7.44632e-06
CCNC	7.44434e-06
LNPK	7.44428e-06
SLC25A39	7.44313e-06
GATAD2A	7.44282e-06
ATPAF2	7.44249e-06
ZNF70	7.44086e-06
PCNX4	7.43685e-06
KLF12	7.43683e-06
ENSSSCG00000005092	7.43632e-06
RFX1	7.43621e-06
UGGT1	7.43287e-06
ADPRHL2	7.43005e-06
CYTH1	7.42973e-06
EIF4G3	7.42784e-06
ZMYM1	7.42544e-06
RIPK1	7.42519e-06
HOMER2	7.42294e-06
RELA	7.42095e-06
ENSSSCG00000008317	7.4207e-06
DBNDD2	7.41333e-06
UAP1	7.4095e-06
LETMD1	7.40933e-06
ADAM15	7.40823e-06
RNF170	7.40793e-06
U2SURP	7.40405e-06
EHD1	7.40169e-06
IFIT5	7.39865e-06
TYROBP	7.39483e-06
CMTM3	7.39424e-06
LAMP2	7.38957e-06
AQR	7.38825e-06
ERP29	7.38427e-06
RUSC1	7.37849e-06
ELOA	7.3771e-06
LYPLA2	7.37108e-06
ARL2BP	7.37087e-06
FBXO11	7.35179e-06
IL27RA	7.34896e-06
ENSSSCG00000002004	7.34086e-06
NUDCD2	7.33807e-06
ENSSSCG00000032591	7.32875e-06
IREB2	7.32855e-06
ENSSSCG00000005255	7.30756e-06
ENSSSCG00000017868	7.29582e-06
CSNK1D	7.29086e-06
RBBP7	7.25265e-06
MAPKAPK3	7.24402e-06
ENSSSCG00000036491	7.18184e-06
TMEM109	7.16923e-06
SEC11C	6.97287e-06
RTF1	6.9245e-06
HSPD1	6.90952e-06
POLE4	6.9001e-06
STK26	6.72336e-06
PSMD2	6.66338e-06
NDUFA10	6.61721e-06
SUMO1	6.61541e-06
ENSSSCG00000025007	6.61511e-06
ENSSSCG00000033272	6.58849e-06
FNTA	6.58117e-06
WSB1	6.57298e-06
ENSSSCG00000015710	6.57232e-06
SRSF6	6.57039e-06
SRPK2	6.56795e-06
APPL1	6.55841e-06
ANGPTL1	6.55597e-06
RBM23	6.55484e-06
HACD4	6.55472e-06
ZCCHC17	6.55401e-06
TP53RK	6.54927e-06
GLUL	6.54758e-06
PIP4K2A	6.53448e-06
PHGDH	6.52204e-06
BTBD1	6.52165e-06
LBR	6.52079e-06
POLR1C	6.51622e-06
ARID2	6.51534e-06
EDC4	6.51043e-06
[truncated: 12,388 more rows]

## Sheet: DEG CD4
Supplementary File 13. Cluster-specific differentially expressed genes for CD4 ab T cell clusters (0, 3, 4, 28). Specified genes (gene column) were differentially expressed in cells of a specified cluster (cluster column) compared to the average gene expression for all CD4 ab T cells. pct.1 column corresponds to the percentage of cells expressing a gene in the specified cluster, while pct.2 corre…
p_val	avg_logFC	pct.1	pct.2	p_val_adj	cluster	gene		p_val	P value
0	-0.711365	0.987	0.998	0	0	COX1		avg_logFC	Average Log Fold Change (natural log)
0	-0.74842	0.999	1	0	0	TMSB10		pct.1	% of cells expressed in cluster
0	-1.76691	0.169	0.699	0	0	S100A6		pct.2	% of cells expressed in entire dataset
0	-2.21992	0.195	0.782	0	0	ENSSSCG00000036618		p_val_adj	Adjusted P value
2.53134e-284	0.415042	1	0.999	3.38592e-280	0	RPS3A		gene	Gene name
4.19869e-260	-1.43139	0.541	0.847	5.61616e-256	0	ENSSSCG00000037142		cluster	Cluster number
4.41256e-260	0.354339	1	1	5.90223e-256	0	ENSSSCG00000034617
5.44182e-255	-1.07645	0.529	0.841	7.27897e-251	0	S100A10
3.15054e-234	-1.36966	0.331	0.741	4.21416e-230	0	S100A4
3.02058e-232	0.334408	1	0.999	4.04033e-228	0	ENSSSCG00000003042
1.22395e-227	0.38068	1	0.999	1.63715e-223	0	RPS16
5.24225e-219	-0.510329	0.992	0.998	7.01204e-215	0	COX2
1.57663e-215	-1.5612	0.089	0.504	2.1089e-211	0	S100A11
4.66511e-206	0.338264	1	0.999	6.24005e-202	0	RPL35
6.69178e-205	0.859801	0.758	0.372	8.95092e-201	0	CCR7
1.28884e-204	-1.6592	0.383	0.687	1.72395e-200	0	GPX1
2.65654e-204	-1.41224	0.081	0.494	3.55339e-200	0	ITGB1
8.45952e-201	-1.09149	0.153	0.576	1.13155e-196	0	UCP2
1.50267e-196	0.356628	0.999	0.995	2.00997e-192	0	ENSSSCG00000011272
3.1542e-185	-0.780576	0.687	0.921	4.21905e-181	0	SRGN
7.47777e-185	0.32265	1	0.999	1.00023e-180	0	RPL23
4.21953e-174	0.311766	1	0.999	5.64404e-170	0	RPL9
7.42008e-174	0.301512	1	1	9.9251e-170	0	ENSSSCG00000035080
1.01968e-168	0.305556	1	0.998	1.36393e-164	0	RPL34
6.13505e-167	-0.694384	0.708	0.927	8.20624e-163	0	SAT1
1.79835e-166	0.319726	1	0.996	2.40547e-162	0	RPL6
5.17652e-164	-1.06424	0.08	0.438	6.92411e-160	0	ANXA2
4.35778e-161	0.282829	1	0.999	5.82896e-157	0	ENSSSCG00000040273
3.85646e-158	0.272971	1	1	5.1584e-154	0	ENSSSCG00000035768
1.35318e-151	0.315857	0.998	0.994	1.81001e-147	0	ENSSSCG00000039544
1.10738e-149	-0.439848	0.935	0.981	1.48123e-145	0	ARHGDIB
5.49301e-149	0.299449	0.997	0.995	7.34745e-145	0	ENSSSCG00000014855
1.92321e-141	-1.24372	0.306	0.617	2.57249e-137	0	CD74
3.32747e-141	-0.855798	0.294	0.63	4.45082e-137	0	ENSSSCG00000006395
2.66013e-136	0.791541	0.557	0.23	3.55819e-132	0	SELL
9.32057e-135	-0.907784	0.059	0.372	1.24672e-130	0	CD99
5.12049e-127	0.292791	0.999	0.999	6.84917e-123	0	ENSSSCG00000004489
7.29066e-121	-0.50445	0.835	0.938	9.75199e-117	0	MYL6
1.07558e-120	-0.324413	0.999	0.999	1.43869e-116	0	COX3
1.26778e-117	0.885682	0.441	0.163	1.69578e-113	0	ENSSSCG00000026140
1.7094e-117	0.450428	0.935	0.862	2.28649e-113	0	RPL5
1.3625e-115	0.43727	0.966	0.891	1.82248e-111	0	PLAC8
4.06275e-112	-0.893643	0.12	0.422	5.43433e-108	0	VMP1
5.50887e-112	0.275476	0.996	0.99	7.36866e-108	0	RPS5
5.51776e-111	0.281547	0.999	0.997	7.38056e-107	0	RPL7
6.81529e-107	-0.860143	0.063	0.323	9.11614e-103	0	BST2
3.19674e-101	0.317662	0.979	0.952	4.27596e-97	0	RPL22
6.14488e-97	-0.645836	0.414	0.66	8.21939e-93	0	ENSSSCG00000039071
1.23353e-93	-0.281403	1	0.999	1.64997e-89	0	ATP6
1.55949e-93	0.319716	0.989	0.981	2.08598e-89	0	RPS23
1.92363e-93	-0.626105	0.36	0.62	2.57305e-89	0	HINT1
2.53256e-93	-0.65342	0.193	0.479	3.38755e-89	0	OSTF1
4.02634e-90	0.415269	0.921	0.835	5.38564e-86	0	BTG1
1.65546e-89	-0.773185	0.258	0.512	2.21435e-85	0	ENSSSCG00000005453
7.00803e-89	-0.674313	0.125	0.393	9.37394e-85	0	EML4
2.64021e-88	0.264443	0.996	0.99	3.53155e-84	0	ENSSSCG00000013597
1.88689e-87	-0.657012	0.105	0.363	2.52391e-83	0	CST7
1.27421e-85	-0.439123	0.839	0.936	1.70439e-81	0	SH3BGRL3
1.22978e-80	0.332349	0.958	0.934	1.64495e-76	0	EEF1B2
4.77405e-78	0.67993	0.531	0.308	6.38577e-74	0	LEF1
1.18613e-76	-1.23147	0.269	0.498	1.58657e-72	0	HMGB2
3.19781e-76	-0.675423	0.338	0.573	4.27739e-72	0	VIM
2.12664e-75	-0.533717	0.494	0.708	2.8446e-71	0	ENSSSCG00000032556
4.30854e-75	-0.478337	0.747	0.864	5.7631e-71	0	PFN1
2.9044e-73	0.433236	0.689	0.438	3.88493e-69	0	CTSW
7.858e-72	-0.513511	0.883	0.949	1.05109e-67	0	ACTB
8.20366e-72	-0.461377	0.609	0.794	1.09732e-67	0	CALM1
4.50658e-71	-0.456923	0.631	0.778	6.02801e-67	0	ARPC3
5.62565e-71	-0.601176	0.215	0.463	7.52487e-67	0	SAMHD1
9.83571e-71	-0.860143	0.142	0.36	1.31562e-66	0	HLA-DRA
1.85588e-70	0.400932	0.861	0.766	2.48243e-66	0	PABPC1
9.72829e-70	-0.47707	0.544	0.748	1.30126e-65	0	LSP1
3.29549e-69	0.274803	0.966	0.949	4.40805e-65	0	ENSSSCG00000033019
9.73136e-69	-0.60229	0.081	0.287	1.30167e-64	0	PLP2
1.23447e-68	0.258893	0.978	0.962	1.65123e-64	0	ENSSSCG00000011952
7.40181e-68	-0.581027	0.134	0.359	9.90067e-64	0	RDX
4.07332e-66	-0.511	0.23	0.474	5.44847e-62	0	ENSSSCG00000037775
6.47579e-66	-0.69439	0.078	0.274	8.66202e-62	0	SLA-DQB1
8.1659e-66	-0.652534	0.093	0.297	1.09227e-61	0	ENSSSCG00000001455
2.08667e-65	-0.554802	0.087	0.289	2.79114e-61	0	FLNA
7.71029e-65	-1.29023	0.046	0.217	1.03133e-60	0	LGALS1
1.06736e-64	0.27256	0.965	0.956	1.4277e-60	0	ENSSSCG00000027573
1.35227e-64	-0.586028	0.831	0.881	1.8088e-60	0	ACTG1
1.2031e-62	-0.463765	0.465	0.694	1.60927e-58	0	ARF6
2.82639e-62	-0.521585	0.256	0.494	3.78058e-58	0	TSPO
2.40255e-60	0.263786	0.964	0.955	3.21365e-56	0	RPS13
1.17835e-59	-0.366926	0.944	0.972	1.57617e-55	0	ENSSSCG00000014565
1.31857e-59	-0.813983	0.083	0.259	1.76372e-55	0	DUT
4.02805e-59	-0.286619	0.98	0.985	5.38792e-55	0	ND4
1.71546e-58	0.253947	0.961	0.936	2.2946e-54	0	ENSSSCG00000013064
1.12395e-57	0.634057	0.342	0.167	1.50339e-53	0	RGS10
3.81472e-56	-0.55713	0.232	0.431	5.10257e-52	0	ENSSSCG00000003914
1.1352e-55	0.259914	0.953	0.926	1.51844e-51	0	RPS21
5.63534e-55	0.471016	0.546	0.355	7.53783e-51	0	TCF7
6.63791e-55	-0.542239	0.279	0.496	8.87887e-51	0	ENSSSCG00000024973
5.17627e-54	-0.455733	0.097	0.283	6.92377e-50	0	PARVG
1.65909e-53	-0.29664	0.927	0.959	2.2192e-49	0	CFL1
2.4183e-53	-0.482062	0.233	0.462	3.23472e-49	0	NDFIP2
5.46453e-53	-0.501556	0.238	0.456	7.30935e-49	0	ITGA4
1.31921e-52	-0.622919	0.07	0.236	1.76457e-48	0	ENSSSCG00000029596
3.95099e-52	-0.447951	0.267	0.483	5.28485e-48	0	GNB2
8.23539e-52	-0.256568	0.996	1	1.10157e-47	0	ENSSSCG00000001229
1.20061e-51	-0.446186	0.286	0.506	1.60594e-47	0	ENSSSCG00000032003
2.04646e-51	-0.329661	0.855	0.949	2.73735e-47	0	ENSSSCG00000001341
1.06912e-50	-0.333378	0.949	0.96	1.43006e-46	0	CYTB
2.74125e-50	-0.483845	0.23	0.433	3.66669e-46	0	GLIPR2
4.43139e-50	-0.548622	0.096	0.267	5.92743e-46	0	ENSSSCG00000001456
7.11019e-50	-0.459922	0.22	0.426	9.51059e-46	0	PSMB9
1.6234e-49	-0.435952	0.054	0.207	2.17146e-45	0	EMB
2.01047e-49	-0.370397	0.541	0.718	2.6892e-45	0	PTPRCAP
5.81042e-48	-0.457992	0.289	0.504	7.77202e-44	0	S100A13
1.29328e-47	-0.462565	0.16	0.355	1.72989e-43	0	MRPS25
2.30819e-46	-0.471512	0.084	0.244	3.08744e-42	0	MISP3
3.6057e-46	0.273413	0.996	0.996	4.82299e-42	0	TPT1
6.87346e-46	-0.284669	0.845	0.901	9.19394e-42	0	ARPC2
9.11224e-46	-0.45557	0.26	0.459	1.21885e-41	0	SUSD3
1.30885e-45	-0.418755	0.161	0.354	1.75071e-41	0	ENSSSCG00000035256
1.71751e-45	-0.42954	0.203	0.394	2.29734e-41	0	ARPC5L
2.05445e-44	-0.44611	0.114	0.282	2.74804e-40	0	TYMS
9.11467e-44	-0.416577	0.095	0.256	1.21918e-39	0	LY96
1.45349e-43	-0.370823	0.403	0.612	1.94419e-39	0	VAMP8
2.31126e-43	-0.407549	0.276	0.476	3.09154e-39	0	ARHGDIA
4.96635e-43	0.461046	0.267	0.119	6.64299e-39	0	FADS3
6.66162e-43	-0.396333	0.127	0.302	8.91058e-39	0	ZNRF1
7.46071e-42	-0.425595	0.08	0.229	9.97944e-38	0	ENSSSCG00000011234
1.40345e-41	-0.385768	0.491	0.649	1.87726e-37	0	COX5B
2.51125e-41	0.332091	0.841	0.779	3.35905e-37	0	ENSSSCG00000000576
7.85062e-41	0.595665	0.311	0.166	1.0501e-36	0	CD69
6.79701e-40	-0.412918	0.115	0.276	9.09168e-36	0	SMAP1
9.37936e-40	-0.407889	0.24	0.423	1.25458e-35	0	CDK2AP2
1.30517e-39	-0.447802	0.203	0.369	1.74579e-35	0	DYNLL1
6.68025e-39	-0.370548	0.355	0.55	8.93551e-35	0	ENSSSCG00000025499
9.70331e-39	-0.436017	0.097	0.244	1.29791e-34	0	TMEM173
1.29084e-36	-0.343642	0.396	0.584	1.72662e-32	0	RAP1A
2.65009e-36	0.490708	0.21	0.092	3.54477e-32	0	GSTA4
3.2884e-36	-0.351596	0.069	0.201	4.39857e-32	0	ITM2C
3.69328e-36	-0.376487	0.158	0.321	4.94013e-32	0	ENSSSCG00000003253
4.89887e-36	-0.359018	0.192	0.367	6.55273e-32	0	DYNLT3
6.28387e-35	0.287133	0.712	0.578	8.4053e-31	0	TRAT1
1.03413e-34	-0.396812	0.132	0.277	1.38325e-30	0	TPM4
1.06947e-34	-0.370204	0.172	0.336	1.43052e-30	0	MYO1G
1.34099e-34	-0.359825	0.387	0.555	1.7937e-30	0	ENSSSCG00000013366
1.55175e-34	0.28265	0.811	0.76	2.07562e-30	0	EIF4A2
1.57188e-34	-0.37443	0.075	0.207	2.10254e-30	0	RORA
2.07303e-34	-0.354482	0.372	0.554	2.77288e-30	0	EZR
4.83423e-34	-0.305261	0.118	0.266	6.46627e-30	0	ENSSSCG00000007088
2.29928e-33	-0.354861	0.201	0.364	3.07551e-29	0	MAP2K2
3.96254e-33	-0.297157	0.105	0.249	5.30029e-29	0	TMEM160
4.30568e-33	-0.312686	0.594	0.723	5.75927e-29	0	PSMB8
1.39245e-32	-0.543713	0.678	0.748	1.86254e-28	0	LTB
1.46894e-32	-0.425958	0.112	0.247	1.96486e-28	0	CD40LG
3.49344e-32	-0.403418	0.272	0.432	4.67282e-28	0	ENSSSCG00000018063
3.64734e-32	-0.384063	0.432	0.572	4.87869e-28	0	ENSSSCG00000024776
5.88261e-32	-0.401975	0.154	0.304	7.86857e-28	0	GPR183
7.537e-32	-0.30935	0.203	0.374	1.00815e-27	0	REEP5
1.07216e-31	-0.297204	0.536	0.69	1.43412e-27	0	ENSSSCG00000010203
1.20217e-31	-0.285575	0.764	0.866	1.60803e-27	0	ENSSSCG00000008433
1.26206e-31	-0.329591	0.413	0.596	1.68813e-27	0	ENSSSCG00000000657
1.63613e-31	-0.326459	0.274	0.449	2.18849e-27	0	SPCS3
4.93011e-31	-0.364123	0.171	0.315	6.59451e-27	0	SLC25A5
6.54121e-31	-0.304605	0.455	0.623	8.74952e-27	0	CAPZA1
1.46118e-30	-0.326437	0.237	0.405	1.95448e-26	0	GRB2
3.14516e-30	-0.339645	0.361	0.522	4.20696e-26	0	ENSSSCG00000023158
3.688e-30	-0.322936	0.096	0.227	4.93308e-26	0	ENSSSCG00000022176
3.80224e-30	-0.340953	0.357	0.525	5.08587e-26	0	ENSSSCG00000012397
5.77409e-30	-0.283419	0.082	0.206	7.72342e-26	0	NFKBIB
6.17026e-30	-0.25306	0.739	0.845	8.25335e-26	0	MIF
7.61342e-30	-0.304945	0.331	0.498	1.01837e-25	0	TMEM50A
1.90946e-29	-0.283093	0.111	0.246	2.5541e-25	0	LXN
1.99382e-29	-0.267761	0.081	0.205	2.66694e-25	0	ARRB2
2.47109e-29	-0.316244	0.15	0.291	3.30533e-25	0	TWF2
3.71704e-29	-0.311055	0.412	0.558	4.97191e-25	0	ENSSSCG00000002907
6.16629e-29	-0.341934	0.297	0.454	8.24803e-25	0	ATP5MC1
7.25182e-29	-0.301768	0.157	0.299	9.70004e-25	0	LAMTOR2
8.99547e-29	-0.287387	0.086	0.208	1.20323e-24	0	ENSSSCG00000012166
9.99106e-29	-0.337306	0.209	0.357	1.3364e-24	0	ENSSSCG00000027826
1.22689e-28	-0.303654	0.345	0.516	1.64109e-24	0	ARPC4
1.99769e-28	-0.387476	0.256	0.409	2.67211e-24	0	CAPG
3.34878e-28	-0.328938	0.223	0.377	4.47933e-24	0	ITGB7
5.82268e-28	-0.281095	0.564	0.702	7.78842e-24	0	COX6A1
7.54985e-28	-0.284623	0.324	0.494	1.00987e-23	0	NTAN1
1.08348e-27	-0.284829	0.523	0.665	1.44926e-23	0	ENSSSCG00000017213
1.59985e-27	-0.317027	0.386	0.523	2.13996e-23	0	DBI
2.8026e-27	-0.29231	0.29	0.451	3.74876e-23	0	NDUFB10
3.41839e-27	-0.254198	0.563	0.712	4.57244e-23	0	ENSSSCG00000007188
3.80801e-27	-0.33182	0.498	0.641	5.0936e-23	0	ENSSSCG00000036114
4.36972e-27	-0.341214	0.333	0.473	5.84493e-23	0	PSMB2
4.71769e-27	-0.289104	0.228	0.381	6.31038e-23	0	NDUFB7
4.74415e-27	-0.321714	0.46	0.582	6.34578e-23	0	COX7A2
4.88525e-27	-0.305611	0.486	0.615	6.53451e-23	0	ENSSSCG00000015337
6.29912e-27	-0.254766	0.884	0.917	8.4257e-23	0	ENSSSCG00000033721
1.20767e-26	-0.286684	0.227	0.379	1.61538e-22	0	TMEM258
1.55982e-26	-0.36485	0.208	0.337	2.08641e-22	0	POMP
2.69653e-26	-0.304629	0.249	0.403	3.60687e-22	0	UNC119
5.40896e-26	-0.316067	0.519	0.635	7.23502e-22	0	COX17
6.71131e-26	-0.49809	0.118	0.233	8.97704e-22	0	ANXA1
6.9062e-26	-0.280847	0.498	0.641	9.23773e-22	0	ENSSSCG00000034019
1.25684e-25	-0.295754	0.177	0.318	1.68115e-21	0	PFDN4
2.59478e-25	-0.26957	0.181	0.323	3.47077e-21	0	DDOST
3.28226e-25	-0.259059	0.694	0.781	4.39035e-21	0	COX8A
5.39903e-25	-0.292507	0.246	0.393	7.22175e-21	0	TGIF2-RAB5IF
5.9252e-25	-0.255832	0.214	0.363	7.92555e-21	0	RALY
6.10894e-25	-0.300991	0.111	0.228	8.17131e-21	0	ST6GALNAC4
8.10623e-25	-0.784709	0.38	0.491	1.08429e-20	0	IFI6
8.26754e-25	-0.279708	0.167	0.301	1.10587e-20	0	IDH2
9.0837e-25	-0.269325	0.134	0.26	1.21504e-20	0	NDUFV2
1.01586e-24	-0.298142	0.166	0.297	1.35882e-20	0	NDUFB2
1.39563e-24	-0.268898	0.2	0.344	1.8668e-20	0	SDF4
1.83443e-24	-0.253719	0.555	0.69	2.45373e-20	0	ENSSSCG00000008061
2.71105e-24	-0.279793	0.385	0.523	3.6263e-20	0	ENSSSCG00000002550
4.46945e-24	-0.289545	0.159	0.289	5.97833e-20	0	HSPA5
6.59388e-24	-0.277435	0.138	0.262	8.81998e-20	0	ATP6V0B
1.14317e-23	-0.296479	0.179	0.31	1.5291e-19	0	SERPINF1
1.22857e-23	0.379144	0.21	0.112	1.64333e-19	0	MNDA
2.50782e-23	-0.315474	0.661	0.739	3.35447e-19	0	GAPDH
3.33972e-23	-0.291045	0.365	0.519	4.4672e-19	0	ITGB2
4.80881e-23	-0.310589	0.204	0.332	6.43226e-19	0	ATP5MC3
4.82395e-23	-0.254896	0.173	0.305	6.45252e-19	0	FERMT3
5.10002e-23	-0.280301	0.618	0.731	6.82179e-19	0	ENSSSCG00000004145
5.47998e-23	-0.288362	0.129	0.249	7.33002e-19	0	ENSSSCG00000004307
3.72459e-22	-0.268153	0.142	0.259	4.98201e-18	0	ENSSSCG00000006830
4.28438e-22	-0.286758	0.746	0.809	5.73079e-18	0	LAPTM5
4.95044e-22	-0.284006	0.227	0.359	6.6217e-18	0	MIEN1
5.41417e-22	-0.260616	0.515	0.636	7.24199e-18	0	ENSSSCG00000015710
5.45014e-22	-0.281159	0.16	0.283	7.29011e-18	0	ENSSSCG00000004414
6.8537e-22	-0.264822	0.323	0.472	9.16751e-18	0	RHOA
6.96763e-22	0.292903	0.704	0.652	9.3199e-18	0	HSP90AB1
1.10021e-21	0.292739	0.655	0.606	1.47164e-17	0	HSPE1
1.27195e-21	-0.284746	0.233	0.359	1.70135e-17	0	SNRPD1
3.03865e-21	-0.28594	0.106	0.209	4.0645e-17	0	RPA3
3.89021e-21	0.352405	0.344	0.235	5.20354e-17	0	PDK1
4.40707e-21	-0.258663	0.189	0.316	5.8949e-17	0	ELOC
4.72552e-21	-0.261022	0.414	0.554	6.32085e-17	0	ENSSSCG00000020790
5.61057e-21	-0.319762	0.466	0.572	7.5047e-17	0	H2AFV
1.48885e-20	-0.264579	0.235	0.368	1.99149e-16	0	ENSSSCG00000001779
2.08436e-20	-0.258065	0.253	0.385	2.78804e-16	0	SEC11A
2.08483e-20	-0.251074	0.197	0.323	2.78867e-16	0	AP2S1
2.84452e-20	-0.263872	0.387	0.52	3.80482e-16	0	ENSSSCG00000000905
4.52785e-20	-0.252696	0.174	0.295	6.05645e-16	0	SH2D1A
6.46755e-20	-0.256588	0.203	0.325	8.651e-16	0	CALM3
7.30584e-20	-0.250475	0.305	0.444	9.77229e-16	0	PSMA3
1.45822e-19	-0.251439	0.297	0.436	1.95051e-15	0	MRPL57
1.85112e-19	-0.254522	0.414	0.547	2.47606e-15	0	YWHAZ
2.76173e-19	0.336305	0.497	0.418	3.69409e-15	0	HMGN3
2.97429e-19	-0.269323	0.311	0.439	3.97841e-15	0	ENSSSCG00000006061
3.62628e-19	-0.252794	0.363	0.485	4.85051e-15	0	ENSSSCG00000039582
3.84252e-19	-0.301648	0.2	0.318	5.13975e-15	0	IL6R
1.17434e-18	-0.593249	0.313	0.414	1.5708e-14	0	H2AFZ
1.5575e-18	-0.263851	0.231	0.357	2.08332e-14	0	ENSSSCG00000016263
1.81376e-18	-0.267515	0.136	0.241	2.42609e-14	0	GATA3
3.32793e-18	-0.429427	0.15	0.25	4.45144e-14	0	NKG7
5.39571e-18	0.400934	0.374	0.284	7.21731e-14	0	ID2
7.83515e-18	-0.300115	0.696	0.763	1.04803e-13	0	ENSSSCG00000009327
2.24216e-17	0.28514	0.51	0.423	2.99912e-13	0	ATRX
1.04914e-16	-0.278463	0.208	0.314	1.40333e-12	0	UBE2L6
1.51385e-16	0.358754	0.229	0.146	2.02493e-12	0	LMO4
2.11148e-16	0.381753	0.394	0.31	2.82432e-12	0	SMC4
2.20334e-16	0.341739	0.411	0.327	2.94718e-12	0	CHD3
2.321e-16	-0.25325	0.538	0.657	3.10457e-12	0	ENSSSCG00000001398
8.15015e-16	0.343101	0.298	0.212	1.09016e-11	0	LNPEP
6.84719e-15	0.275753	0.567	0.515	9.1588e-11	0	PNISR
1.15218e-14	0.271393	0.51	0.441	1.54116e-10	0	ABLIM1
7.41403e-13	0.265837	0.542	0.49	9.91701e-09	0	ENSSSCG00000016758
1.46941e-12	0.300322	0.234	0.163	1.96548e-08	0	TBC1D20
1.48277e-12	0.258905	0.311	0.23	1.98335e-08	0	ENSSSCG00000023792
4.64157e-12	0.285781	0.281	0.208	6.20856e-08	0	UBL3
9.59629e-12	0.27344	0.377	0.3	1.2836e-07	0	RCAN3
1.08778e-11	-0.504325	0.19	0.259	1.45501e-07	0	ENSSSCG00000035520
8.40272e-11	0.340343	0.322	0.254	1.12395e-06	0	ENSSSCG00000039581
1.1311e-08	-0.639804	0.331	0.393	0.000151296	0	ISG15
5.9769e-08	0.276279	0.357	0.312	0.00079947	0	STK17B
1.39587e-07	-0.307615	0.174	0.232	0.00186712	0	IFIT1
2.49652e-07	-0.429453	0.551	0.584	0.00333934	0	HMGN2
4.04842e-91	0.629466	0.846	0.675	5.41517e-87	3	LTB
1.95996e-58	0.368535	0.734	0.489	2.62164e-54	3	ENSSSCG00000036618
2.64048e-42	0.298706	0.912	0.817	3.5319e-38	3	SAT1
5.27083e-38	0.264818	0.908	0.802	7.05026e-34	3	SRGN
1.84007e-29	0.461222	0.289	0.16	2.46127e-25	3	CD40LG
4.94979e-26	-0.473277	0.163	0.31	6.62084e-22	3	ENSSSCG00000026140
1.05499e-25	-0.591199	0.101	0.225	1.41116e-21	3	DUT
1.51019e-25	-0.381149	0.828	0.875	2.02003e-21	3	ACTG1
2.35037e-25	-0.528204	0.394	0.526	3.14385e-21	3	STMN1
1.03028e-23	-0.832944	0.109	0.23	1.3781e-19	3	GZMB
8.30672e-22	0.326976	0.431	0.3	1.11111e-17	3	ITGB1
3.58959e-20	0.366422	0.458	0.336	4.80143e-16	3	ENSSSCG00000031912
1.96684e-19	-0.54135	0.504	0.597	2.63085e-15	3	HMGN2
3.1688e-19	-0.315271	0.158	0.282	4.23859e-15	3	ENSSSCG00000026064
5.33533e-19	0.368314	0.354	0.242	7.13654e-15	3	IL6R
7.91281e-19	-0.396758	0.225	0.354	1.05842e-14	3	ID2
4.51256e-18	0.338059	0.458	0.354	6.03601e-14	3	SUSD3
9.09555e-18	0.266534	0.703	0.64	1.21662e-13	3	ITM2B
1.56122e-17	-0.300546	0.246	0.379	2.08829e-13	3	SMC4
2.72604e-15	-0.28328	0.155	0.264	3.64635e-11	3	RGS10
2.47265e-12	0.256745	0.478	0.389	3.30742e-08	3	UCP2
1.7906e-11	0.275264	0.272	0.192	2.39511e-07	3	SMAD2
4.33032e-11	0.273146	0.421	0.347	5.79224e-07	3	SAMHD1
1.67662e-10	-0.251678	0.601	0.666	2.24264e-06	3	HSP90AA1
2.77586e-09	0.284254	0.202	0.138	3.71299e-05	3	STARD4
2.85054e-09	-0.441894	0.302	0.394	3.81288e-05	3	ISG15
3.90251e-08	-0.477095	0.326	0.394	0.000522	3	H2AFZ
1.2229e-07	0.277401	0.444	0.396	0.00163575	3	ARL6IP1
5.61963e-07	-0.350006	0.167	0.228	0.00751681	3	NKG7
2.10602e-06	0.287724	0.226	0.175	0.0281701	3	ANXA1
3.72824e-202	0.577944	0.999	0.992	4.9869e-198	4	COX1
3.80237e-175	1.07886	0.773	0.392	5.08606e-171	4	S100A6
1.2731e-171	1.08736	0.805	0.464	1.7029e-167	4	ENSSSCG00000036618
1.84317e-171	0.949858	0.908	0.663	2.46543e-167	4	ENSSSCG00000037142
2.03469e-168	0.379068	1	0.999	2.7216e-164	4	TMSB10
1.03617e-147	-0.368528	0.998	1	1.38599e-143	4	RPS3A
3.26157e-135	1.07845	0.585	0.255	4.36268e-131	4	S100A11
5.15522e-131	0.955126	0.789	0.507	6.89562e-127	4	S100A4
4.2957e-128	-0.297617	0.999	1	5.74593e-124	4	ENSSSCG00000034617
9.52102e-127	0.385547	0.996	0.996	1.27353e-122	4	COX2
3.75666e-123	-0.289453	0.999	1	5.02491e-119	4	ENSSSCG00000003042
5.09349e-113	0.9962	0.728	0.511	6.81305e-109	4	GPX1
1.10461e-109	-0.849274	0.272	0.612	1.47752e-105	4	CCR7
4.47248e-109	-0.314939	0.999	1	5.98238e-105	4	RPS16
2.6934e-104	1.03169	0.685	0.428	3.6027e-100	4	CD74
4.59376e-97	0.541478	0.87	0.666	6.14461e-93	4	S100A10
2.10056e-96	-0.277248	0.999	1	2.8097e-92	4	RPL35
8.1242e-96	0.838272	0.545	0.258	1.08669e-91	4	ITGB1
1.67058e-95	-0.295037	0.993	0.999	2.23457e-91	4	RPL6
4.33561e-84	0.473436	0.932	0.81	5.79932e-80	4	SAT1
3.29838e-83	-0.253311	0.999	1	4.41192e-79	4	RPL23
4.85829e-82	-0.263736	0.996	0.996	6.49845e-78	4	ENSSSCG00000014855
2.78218e-80	-0.273969	0.999	0.999	3.72145e-76	4	ENSSSCG00000004489
5.98332e-78	-0.269283	0.995	0.997	8.00329e-74	4	ENSSSCG00000011272
9.09071e-76	0.404221	0.947	0.881	1.21597e-71	4	MYL6
1.8456e-74	0.503972	0.924	0.797	2.46867e-70	4	SRGN
3.71768e-73	0.566244	0.601	0.343	4.97276e-69	4	UCP2
2.12682e-71	-0.255402	0.993	0.996	2.84483e-67	4	ENSSSCG00000039544
2.41961e-70	-0.410974	0.825	0.914	3.23647e-66	4	RPL5
2.61584e-63	0.403259	0.952	0.879	3.49894e-59	4	SH3BGRL3
6.02913e-58	1.222	0.275	0.105	8.06457e-54	4	LGALS1
7.5571e-58	0.848263	0.423	0.222	1.01084e-53	4	HLA-DRA
4.07377e-56	0.492816	0.467	0.239	5.44908e-52	4	ANXA2
1.5155e-54	0.260005	0.982	0.956	2.02713e-50	4	ARHGDIB
1.6966e-54	-0.280873	0.976	0.987	2.26938e-50	4	RPS23
8.19137e-54	0.68437	0.333	0.149	1.09568e-49	4	SLA-DQB1
1.07236e-53	-0.664971	0.191	0.416	1.43438e-49	4	SELL
2.0633e-53	0.561782	0.399	0.197	2.75987e-49	4	CD99
2.37167e-53	0.672933	0.353	0.168	3.17235e-49	4	ENSSSCG00000001455
5.18276e-49	0.327405	0.96	0.895	6.93246e-45	4	ENSSSCG00000001341
8.43718e-49	0.413361	0.781	0.628	1.12856e-44	4	LSP1
3.37045e-48	0.407811	0.965	0.908	4.50831e-44	4	ACTB
1.72637e-46	-0.254649	0.94	0.971	2.30919e-42	4	RPL22
4.89045e-46	0.543433	0.447	0.254	6.54146e-42	4	VMP1
1.82644e-45	-0.255907	0.935	0.963	2.44305e-41	4	ENSSSCG00000033019
4.63413e-45	-0.281806	0.859	0.931	6.19861e-41	4	ENSSSCG00000004945
7.11856e-45	-0.259853	0.942	0.964	9.52178e-41	4	RPS13
1.24693e-44	-0.260175	0.936	0.968	1.6679e-40	4	ENSSSCG00000027573
2.47425e-44	0.422588	0.831	0.767	3.30956e-40	4	LAPTM5
7.68303e-44	-0.361415	0.715	0.835	1.02768e-39	4	PABPC1
8.57758e-44	0.377741	0.905	0.846	1.14734e-39	4	ACTG1
1.17024e-43	0.553024	0.399	0.226	1.56532e-39	4	RDX
9.04808e-43	0.493976	0.237	0.094	1.21027e-38	4	IKZF2
2.24452e-42	-0.420989	0.493	0.68	3.00227e-38	4	TRAT1
2.65498e-42	-0.349494	0.811	0.889	3.5513e-38	4	BTG1
4.92975e-42	0.625179	0.341	0.179	6.59404e-38	4	BST2
1.74224e-41	0.516386	0.206	0.076	2.33042e-37	4	C15orf48
2.78034e-41	0.507124	0.42	0.242	3.71899e-37	4	EML4
3.68891e-41	0.397419	0.733	0.559	4.93428e-37	4	ARF6
1.12966e-39	0.566118	0.315	0.159	1.51104e-35	4	ENSSSCG00000001456
1.85376e-39	0.325273	0.975	0.956	2.47959e-35	4	ENSSSCG00000014565
4.19415e-39	0.422069	0.5	0.321	5.6101e-35	4	OSTF1
4.92709e-39	0.332935	0.796	0.694	6.59048e-35	4	ARPC3
4.62623e-38	0.408115	0.639	0.449	6.18804e-34	4	ENSSSCG00000006395
1.33177e-36	-0.259141	0.895	0.928	1.78137e-32	4	RACK1
1.47676e-36	-0.564632	0.364	0.536	1.97531e-32	4	STMN1
1.20525e-35	0.437024	0.491	0.322	1.61214e-31	4	SAMHD1
1.60186e-35	-0.270812	0.869	0.938	2.14265e-31	4	PLAC8
1.53306e-34	0.295855	0.874	0.798	2.05062e-30	4	PFN1
2.13162e-33	-0.254248	0.914	0.954	2.85125e-29	4	EEF1B2
4.40738e-32	0.620959	0.202	0.088	5.89531e-28	4	ISG20
1.75851e-31	-0.506112	0.272	0.439	2.35218e-27	4	LEF1
5.45475e-31	-0.32023	0.731	0.83	7.29628e-27	4	ENSSSCG00000000576
1.12403e-29	0.416457	0.373	0.223	1.5035e-25	4	CST7
1.22332e-29	0.340935	0.669	0.527	1.63631e-25	4	ENSSSCG00000039071
1.68317e-29	0.405	0.532	0.38	2.25141e-25	4	S100A13
2.33139e-29	0.354661	0.712	0.593	3.11847e-25	4	ENSSSCG00000032556
8.54664e-29	0.369459	0.535	0.369	1.1432e-24	4	ENSSSCG00000005453
1.18638e-28	-0.408623	0.315	0.471	1.5869e-24	4	TCF7
2.12789e-28	0.270224	0.958	0.955	2.84627e-24	4	CYTB
1.23032e-27	-0.553024	0.166	0.309	1.64568e-23	4	ENSSSCG00000026140
1.77526e-26	0.384665	0.505	0.364	2.37459e-22	4	TSPO
2.74905e-26	-0.354661	0.543	0.655	3.67713e-22	4	HSPE1
4.08149e-26	0.418171	0.201	0.097	5.4594e-22	4	MYO1F
4.67669e-26	0.508434	0.258	0.14	6.25553e-22	4	ENSSSCG00000029596
6.69268e-26	0.442659	0.511	0.377	8.95212e-22	4	ENSSSCG00000024973
2.36544e-25	-0.460245	0.137	0.27	3.16401e-21	4	RGS10
3.67107e-25	0.370777	0.284	0.16	4.91042e-21	4	LY96
1.3231e-23	0.415299	0.209	0.106	1.76978e-19	4	CD8A
1.35473e-23	0.468356	0.455	0.339	1.81209e-19	4	ENSSSCG00000018063
2.07173e-23	0.367475	0.229	0.121	2.77114e-19	4	ITM2C
2.65561e-23	-0.326724	0.407	0.546	3.55214e-19	4	ENSSSCG00000033733
1.382e-22	0.331793	0.492	0.366	1.84856e-18	4	GNB2
1.24334e-21	0.261666	0.808	0.691	1.66309e-17	4	CALM1
3.53192e-21	0.253547	0.625	0.482	4.72429e-17	4	HINT1
3.84518e-21	-0.393312	0.094	0.206	5.14331e-17	4	FADS3
4.17011e-21	0.352202	0.476	0.345	5.57794e-17	4	ENSSSCG00000037775
5.6421e-21	-0.490123	0.137	0.253	7.54688e-17	4	CD69
5.80301e-21	0.381198	0.438	0.317	7.7621e-17	4	CAPG
2.68912e-20	-0.363011	0.184	0.311	3.59696e-16	4	PDK1
3.53473e-20	0.278208	0.641	0.528	4.72806e-16	4	CAPZA1
4.32873e-20	0.347137	0.292	0.181	5.79011e-16	4	PARVG
7.38786e-20	0.362766	0.365	0.249	9.88201e-16	4	ENSSSCG00000035256
2.20184e-19	0.300457	0.573	0.449	2.94518e-15	4	VIM
1.10574e-18	0.308931	0.292	0.182	1.47904e-14	4	FLNA
2.09876e-18	0.771765	0.508	0.426	2.8073e-14	4	IFI6
2.76977e-18	0.340618	0.463	0.341	3.70484e-14	4	NDFIP2
2.78146e-18	0.268148	0.617	0.492	3.72048e-14	4	ENSSSCG00000000657
4.29049e-18	0.263345	0.613	0.501	5.73896e-14	4	VAMP8
4.43017e-18	0.335303	0.25	0.149	5.9258e-14	4	ENSSSCG00000022176
5.12714e-18	0.352107	0.214	0.124	6.85806e-14	4	EMB
6.28719e-18	0.313472	0.43	0.316	8.40975e-14	4	PSMB9
1.65391e-17	-0.295893	0.358	0.482	2.21228e-13	4	HMGN3
1.70359e-17	0.376253	0.24	0.147	2.27873e-13	4	ENSSSCG00000011234
5.67462e-17	0.294076	0.529	0.421	7.59037e-13	4	ARPC4
9.57942e-17	0.311208	0.28	0.181	1.28134e-12	4	PLP2
1.33805e-16	-0.265102	0.619	0.692	1.78977e-12	4	HSP90AB1
1.52209e-16	0.250596	0.591	0.482	2.03594e-12	4	RAP1A
1.87527e-16	0.284765	0.534	0.432	2.50836e-12	4	ITGB2
6.51087e-16	0.305676	0.258	0.162	8.70893e-12	4	TMEM173
1.58953e-14	0.292642	0.415	0.312	2.12616e-10	4	GRB2
5.29556e-14	0.290937	0.444	0.346	7.08334e-10	4	ITGA4
1.33496e-13	0.318821	0.314	0.221	1.78564e-09	4	GPR183
1.54148e-13	0.255492	0.5	0.402	2.06189e-09	4	NTAN1
1.66742e-13	0.251691	0.64	0.557	2.23034e-09	4	UBC
1.68135e-13	0.254889	0.497	0.393	2.24897e-09	4	ENSSSCG00000032003
1.84166e-13	-0.323139	0.623	0.657	2.46341e-09	4	HSP90AA1
1.89261e-13	0.259657	0.542	0.45	2.53156e-09	4	ENSSSCG00000025499
7.91393e-13	0.274257	0.367	0.277	1.05857e-08	4	MAP2K2
8.30071e-13	0.296072	0.384	0.297	1.1103e-08	4	ARPC5L
9.08116e-13	-0.255547	0.352	0.448	1.2147e-08	4	NUCKS1
1.02643e-12	0.279811	0.203	0.128	1.37295e-08	4	SLA-DMA
1.21439e-12	0.269788	0.298	0.214	1.62437e-08	4	TWF2
1.38092e-12	0.290087	0.383	0.294	1.84712e-08	4	ITGB7
2.85938e-12	-0.324262	0.211	0.306	3.82471e-08	4	ENSSSCG00000039581
3.39816e-12	0.26045	0.348	0.255	4.54538e-08	4	MRPS25
3.9326e-12	0.273885	0.32	0.235	5.26024e-08	4	ENSSSCG00000003253
5.31954e-12	0.297347	0.31	0.225	7.11542e-08	4	SH2D1A
7.6982e-12	0.253678	0.212	0.136	1.02971e-07	4	RORA
8.31867e-12	0.263666	0.252	0.172	1.1127e-07	4	TMEM160
9.62107e-12	0.254713	0.667	0.59	1.28691e-07	4	ENSSSCG00000001398
4.3633e-11	0.25926	0.218	0.145	5.83634e-07	4	GSN
4.72049e-11	-0.294142	0.277	0.367	6.31413e-07	4	SMC4
5.30839e-11	0.256819	0.277	0.199	7.1005e-07	4	BCAS4
6.01257e-11	-0.29067	0.265	0.349	8.04241e-07	4	TUBB
6.6729e-11	0.259736	0.24	0.167	8.92567e-07	4	HSH2D
1.34873e-10	0.274164	0.321	0.239	1.80406e-06	4	FLI1
2.01663e-10	-0.262058	0.177	0.26	2.69744e-06	4	SCML4
2.61941e-10	0.29277	0.328	0.253	3.50373e-06	4	UBE2L6
2.65305e-10	0.297694	0.275	0.201	3.54872e-06	4	TPM4
5.73406e-10	-0.281851	0.194	0.268	7.66988e-06	4	ENSSSCG00000026064
8.02236e-10	-0.30057	0.5	0.561	1.07307e-05	4	TUBA1B
1.20664e-09	0.25274	0.354	0.28	1.61401e-05	4	ENSSSCG00000027826
1.26711e-09	0.450935	0.258	0.194	1.69488e-05	4	NKG7
1.89342e-09	0.293335	0.219	0.153	2.53264e-05	4	CTSH
4.76622e-09	0.313677	0.236	0.171	6.37529e-05	4	ANXA1
9.45643e-09	0.285905	0.253	0.187	0.000126489	4	ENSSSCG00000000663
1.18363e-08	0.730521	0.407	0.355	0.000158322	4	ISG15
1.25939e-08	0.266006	0.25	0.185	0.000168456	4	ENSSSCG00000004307
2.22207e-07	-0.427442	0.493	0.379	0.00297225	4	HMGB2
0	2.28458	0.875	0.012	0	28	PCLAF
0	1.89193	0.897	0.137	0	28	DUT
0	1.44625	0.814	0.027	0	28	BIRC5
0	1.17318	0.703	0.019	0	28	SPC24
0	1.15014	0.558	0.008	0	28	TK1
0	1.13821	0.608	0.037	0	28	FABP3
0	1.0722	0.672	0.028	0	28	LMNB1
0	1.0024	0.522	0.005	0	28	TPX2
0	0.930037	0.444	0.004	0	28	ENSSSCG00000031741
0	0.775069	0.389	0.002	0	28	DLGAP5
0	0.765133	0.406	0.002	0	28	CDC20
0	0.74032	0.492	0.02	0	28	HIST1H2AG
0	0.7171	0.481	0.014	0	28	MCM4
0	0.677991	0.411	0.007	0	28	KIFC1
0	0.664329	0.403	0.004	0	28	ENSSSCG00000026302
0	0.650258	0.383	0.003	0	28	CENPA
0	0.628124	0.375	0.003	0	28	UHRF1
0	0.599468	0.381	0.007	0	28	ENSSSCG00000034913
0	0.498923	0.319	0.001	0	28	ASF1B
0	0.43519	0.317	0.001	0	28	MYBL2
3.50811e-297	0.598054	0.386	0.009	4.69245e-293	28	CENPS
1.13289e-294	0.904932	0.531	0.03	1.51536e-290	28	CENPE
3.46492e-291	0.47121	0.328	0.004	4.63468e-287	28	CDT1
3.52951e-289	0.49655	0.344	0.006	4.72107e-285	28	CENPU
1.54081e-285	0.796755	0.522	0.029	2.06099e-281	28	CLSPN
9.39053e-284	1.04419	0.622	0.05	1.25608e-279	28	SMC2
4.56705e-275	0.776156	0.481	0.025	6.10888e-271	28	CENPF
1.60449e-272	0.627508	0.408	0.015	2.14617e-268	28	NUF2
3.81914e-271	0.457633	0.269	0.001	5.10848e-267	28	CCNB2
8.41766e-271	0.437213	0.289	0.002	1.12595e-266	28	ENSSSCG00000035908
8.79916e-259	0.815685	0.575	0.044	1.17698e-254	28	ENSSSCG00000017032
1.7163e-255	0.568173	0.333	0.008	2.29573e-251	28	MCM3
3.8424e-255	0.424617	0.3	0.005	5.13959e-251	28	MCM2
7.46409e-255	2.55158	0.989	0.366	9.98397e-251	28	HMGB2
1.63866e-254	0.393587	0.283	0.003	2.19187e-250	28	CENPN
3.03748e-251	0.856398	0.636	0.061	4.06294e-247	28	DDX39A
1.13638e-250	0.512036	0.353	0.011	1.52002e-246	28	CDKN3
1.24607e-250	0.390992	0.247	0.001	1.66675e-246	28	SGO1
2.1993e-244	0.435243	0.244	0.001	2.94179e-240	28	CDCA8
2.55624e-240	0.445234	0.267	0.003	3.41923e-236	28	HMMR
1.27079e-235	0.389468	0.244	0.001	1.69981e-231	28	KIF15
1.59585e-233	0.390969	0.272	0.004	2.1346e-229	28	TCF19
1.59814e-232	0.412762	0.242	0.001	2.13768e-228	28	KIF11
1.4627e-229	0.350777	0.236	0.001	1.95651e-225	28	NDC80
3.05226e-228	0.364308	0.256	0.003	4.08271e-224	28	ZNF367
4.24155e-228	0.908889	0.55	0.049	5.67349e-224	28	MCM7
2.77911e-227	0.638871	0.456	0.03	3.71734e-223	28	MCM6
4.60402e-227	0.397244	0.342	0.012	6.15834e-223	28	CENPM
3.19991e-225	0.325622	0.253	0.003	4.2802e-221	28	ORC1
4.22902e-225	0.522638	0.347	0.013	5.65674e-221	28	MCM5
9.37097e-225	1.98116	0.961	0.331	1.25346e-220	28	H2AFZ
1.12907e-223	0.525072	0.353	0.014	1.51024e-219	28	MXD3
1.68926e-221	0.416354	0.242	0.002	2.25955e-217	28	SGO2
5.2152e-221	0.411793	0.222	0.001	6.97585e-217	28	PIMREG
1.61357e-215	1.79458	1	0.539	2.15832e-211	28	HMGN2
1.79458e-215	0.325453	0.228	0.002	2.40044e-211	28	MTFR2
1.71499e-212	0.341827	0.231	0.002	2.29397e-208	28	NCAPG
7.35532e-210	0.573592	0.333	0.014	9.83847e-206	28	CCNB1
2.97107e-209	0.565257	0.25	0.004	3.9741e-205	28	UBE2C
1.54367e-206	0.790547	0.533	0.052	2.06482e-202	28	TUBB4B
1.95732e-206	0.335328	0.219	0.002	2.61811e-202	28	KIF4A
7.24363e-204	1.08209	0.75	0.125	9.68908e-200	28	RPA3
1.56833e-203	0.30473	0.211	0.001	2.0978e-199	28	PBK
2.65363e-201	0.530468	0.414	0.028	3.5495e-197	28	RFC4
4.6097e-201	1.5722	0.411	0.03	6.16594e-197	28	ENSSSCG00000016903
8.32925e-201	0.643971	0.539	0.053	1.11412e-196	28	CBX5
2.58497e-200	0.722559	0.533	0.053	3.45766e-196	28	ENSSSCG00000031117
6.5864e-199	0.490779	0.378	0.022	8.80997e-195	28	EZH2
4.60008e-198	0.342138	0.214	0.002	6.15307e-194	28	KIF2C
1.34978e-194	0.538799	0.339	0.017	1.80546e-190	28	BBS7
1.45865e-191	1.83804	0.669	0.107	1.95108e-187	28	HIST1H2AB
7.56003e-190	1.45873	0.992	0.451	1.01123e-185	28	STMN1
1.81601e-187	1.12099	0.503	0.054	2.4291e-183	28	PLAAT3
7.84352e-187	0.256547	0.208	0.002	1.04915e-182	28	MCM10
1.13576e-186	0.936875	1	1	1.5192e-182	28	TMSB10
2.33398e-185	1.34126	0.672	0.117	3.12193e-181	28	PCNA
8.37538e-185	0.920047	0.806	0.146	1.12029e-180	28	ENSSSCG00000035209
5.29792e-183	0.369902	0.283	0.011	7.0865e-179	28	E2F2
2.38013e-182	0.318921	0.239	0.006	3.18366e-178	28	CDC45
2.91878e-182	0.308147	0.222	0.004	3.90416e-178	28	MIS18A
3.52943e-182	-0.909129	1	1	4.72096e-178	28	RPS27
3.29964e-180	0.523942	0.417	0.034	4.41359e-176	28	CENPW
1.49886e-179	0.330669	0.219	0.004	2.00487e-175	28	ENSSSCG00000007493
3.55148e-178	0.649405	0.528	0.059	4.75045e-174	28	MAD2L1
1.16161e-177	0.511164	0.383	0.028	1.55377e-173	28	HELLS
7.41537e-177	0.460669	0.347	0.022	9.9188e-173	28	GINS2
1.54123e-175	0.303182	0.219	0.004	2.06155e-171	28	FBXO5
1.11702e-174	0.250172	0.208	0.003	1.49413e-170	28	CDCA7
2.22504e-173	0.50246	0.378	0.028	2.97621e-169	28	CDKN2C
2.24143e-173	0.579197	0.533	0.061	2.99814e-169	28	ENSSSCG00000032060
4.11488e-167	1.08676	0.831	0.204	5.50406e-163	28	ENSSSCG00000026064
1.07979e-164	0.478561	0.317	0.019	1.44432e-160	28	ENSSSCG00000010214
5.31952e-161	1.23611	0.994	0.717	7.11539e-157	28	ENSSSCG00000009327
1.57239e-158	0.748812	0.65	0.107	2.10323e-154	28	IFI30
1.05624e-155	0.487995	0.272	0.014	1.41283e-151	28	TOP2A
1.76402e-155	0.878723	0.789	0.168	2.35955e-151	28	FLNA
2.32931e-154	0.372912	0.214	0.006	3.11569e-150	28	KIF22
2.56952e-154	0.306401	0.264	0.013	3.437e-150	28	MND1
5.80051e-154	0.442949	0.333	0.024	7.75877e-150	28	ATAD2
2.249e-152	1.09574	1	0.852	3.00826e-148	28	ACTG1
1.21793e-151	0.357147	0.25	0.011	1.62911e-147	28	UBE2S
3.08461e-151	-0.772623	1	0.999	4.12597e-147	28	RPL34
2.2894e-149	0.535806	0.369	0.034	3.06231e-145	28	ZBTB32
3.05154e-147	1.04872	0.894	0.255	4.08173e-143	28	ANXA2
9.23808e-147	0.25332	0.217	0.007	1.23569e-142	28	CDK2
3.53475e-146	0.391694	0.333	0.026	4.72808e-142	28	RFC3
9.53523e-146	0.545867	0.467	0.057	1.27543e-141	28	TNFRSF1B
1.00679e-145	0.329212	0.269	0.015	1.34668e-141	28	PNP
1.39769e-145	0.838149	0.531	0.08	1.86955e-141	28	C15orf48
4.45472e-145	0.377855	0.275	0.016	5.95863e-141	28	KNSTRN
6.17791e-145	0.918888	0.883	0.232	8.26357e-141	28	CALM3
1.48832e-144	-0.650715	1	1	1.99077e-140	28	ENSSSCG00000040273
2.22083e-144	-0.679816	1	1	2.97058e-140	28	RPL37
1.75278e-143	1.02711	0.842	0.245	2.34453e-139	28	POMP
1.33885e-142	1.06365	0.906	0.313	1.79085e-138	28	ENSSSCG00000003914
1.50589e-141	0.451841	0.392	0.04	2.01429e-137	28	NASP
2.12854e-140	0.924606	0.631	0.12	2.84713e-136	28	CKS2
3.04104e-140	0.406447	0.35	0.031	4.06769e-136	28	ATAD5
3.7222e-140	1.12354	0.931	0.375	4.97881e-136	28	ENSSSCG00000005453
1.74779e-138	1.03682	0.967	0.484	2.33785e-134	28	ENSSSCG00000024776
2.52379e-137	0.422645	0.422	0.048	3.37582e-133	28	ORC6
1.46113e-136	1.0729	0.989	0.497	1.9544e-132	28	H2AFV
2.57383e-136	0.297896	0.275	0.018	3.44275e-132	28	POC1A
4.06074e-136	-0.63381	1	1	5.43164e-132	28	RPL11
6.75144e-135	0.739905	0.436	0.055	9.03073e-131	28	AQP3
1.75966e-134	0.982702	0.836	0.241	2.35372e-130	28	ATP5MC3
2.36443e-132	0.705339	0.622	0.114	3.16266e-128	28	CKS1B
5.30797e-132	0.309384	0.219	0.01	7.09994e-128	28	BUB1
8.87628e-132	0.647607	0.639	0.12	1.18729e-127	28	GON7
1.04636e-130	1.11468	0.842	0.287	1.39962e-126	28	TUBB
2.98246e-130	0.380785	0.367	0.038	3.98934e-126	28	GMNN
5.15583e-128	0.846208	0.747	0.177	6.89644e-124	28	TYMS
3.82145e-127	-0.602111	1	1	5.11157e-123	28	ENSSSCG00000003042
1.21935e-126	0.48933	0.303	0.026	1.631e-122	28	CTLA4
2.45379e-125	-0.59108	1	1	3.28219e-121	28	ENSSSCG00000034617
4.10137e-125	0.453036	0.522	0.081	5.486e-121	28	TMPO
1.32353e-124	0.67286	0.528	0.088	1.77035e-120	28	ISG20
5.10486e-124	0.298037	0.289	0.023	6.82826e-120	28	MTHFD1
2.28913e-122	0.568252	1	0.999	3.06194e-118	28	PTMA
4.06729e-122	0.3225	0.353	0.037	5.4404e-118	28	ALYREF
1.91223e-121	0.274189	0.231	0.014	2.55781e-117	28	FAAP24
2.485e-121	0.529583	0.536	0.09	3.32394e-117	28	ENSSSCG00000012517
2.63699e-121	-0.628783	1	0.999	3.52723e-117	28	RPL35
1.39834e-119	0.691041	0.994	0.948	1.87043e-115	28	ENSSSCG00000016737
5.80094e-119	0.419496	0.431	0.059	7.75933e-115	28	CCDC167
1.03045e-118	0.293297	0.203	0.01	1.37833e-114	28	RACGAP1
3.60339e-118	-0.632172	1	1	4.81989e-114	28	RPL23
4.61038e-118	0.485698	0.419	0.057	6.16684e-114	28	SLBP
1.66633e-117	0.432261	0.547	0.093	2.22889e-113	28	MYO1F
7.85721e-117	0.828349	0.989	0.755	1.05098e-112	28	ENSSSCG00000036350
1.00435e-116	0.297251	0.278	0.023	1.34342e-112	28	UBE2T
1.31744e-116	0.402965	0.436	0.061	1.76221e-112	28	ENSSSCG00000008035
4.38606e-116	-0.70003	1	0.996	5.8668e-112	28	RPS14
1.08867e-114	0.410588	0.431	0.061	1.45621e-110	28	NT5C
3.88391e-114	0.93474	0.958	0.534	5.19512e-110	28	RAN
8.55945e-114	0.617794	0.553	0.104	1.14491e-109	28	BATF
1.61085e-113	0.438687	0.406	0.055	2.15467e-109	28	ENSSSCG00000008677
2.52635e-113	0.945851	0.992	0.7	3.37925e-109	28	S100A10
5.17583e-113	-0.486494	1	1	6.9232e-109	28	RPS15
5.64797e-112	0.689264	0.742	0.184	7.55473e-108	28	BST2
3.40091e-111	0.848069	0.833	0.271	4.54906e-107	28	SNRPD1
6.51964e-111	0.886525	0.956	0.503	8.72066e-107	28	COX7A2
1.17183e-110	0.346998	0.367	0.046	1.56744e-106	28	DUSP14
1.31619e-110	0.937985	0.975	0.689	1.76053e-106	28	GAPDH
2.03065e-110	0.41776	0.372	0.048	2.7162e-106	28	RFESD
3.50973e-110	0.446627	0.408	0.057	4.69461e-106	28	SKA2
4.40464e-110	0.446073	0.508	0.087	5.89165e-106	28	RPA2
1.64629e-109	0.430146	0.478	0.078	2.20208e-105	28	PRPF19
9.66441e-109	0.522462	0.539	0.101	1.29271e-104	28	ENSSSCG00000004666
3.1633e-107	0.267395	0.303	0.031	4.23123e-103	28	TEX30
3.81099e-107	-0.571339	1	0.998	5.09758e-103	28	HSD11B1L
7.27543e-107	0.678159	0.639	0.143	9.73162e-103	28	DNMT1
1.60237e-106	0.830447	0.986	0.533	2.14333e-102	28	ENSSSCG00000039071
5.05575e-106	-0.595208	1	0.999	6.76257e-102	28	ENSSSCG00000038507
4.70574e-105	0.301532	0.283	0.028	6.2944e-101	28	AHCY
1.17451e-104	0.647188	0.739	0.19	1.57102e-100	28	MDH1
1.30161e-104	-1.34207	0.767	0.876	1.74104e-100	28	BTG1
1.43808e-103	1.18173	0.925	0.515	1.92357e-99	28	TUBA1B
1.58969e-103	0.45986	0.581	0.117	2.12637e-99	28	ENSSSCG00000037071
1.67255e-103	0.257458	0.264	0.024	2.2372e-99	28	BRI3BP
1.84245e-103	0.281518	0.308	0.034	2.46446e-99	28	TOPBP1
3.37509e-103	0.836527	0.828	0.274	4.51453e-99	28	RANBP1
5.40178e-103	-0.46	1	1	7.22543e-99	28	ENSSSCG00000003930
5.49688e-103	0.410567	0.536	0.101	7.35263e-99	28	MAD2L2
3.38258e-102	-0.466338	1	1	4.52454e-98	28	ENSSSCG00000034448
3.72309e-101	0.580445	0.761	0.198	4.98001e-97	28	SNRPC
4.6944e-101	0.286262	0.292	0.031	6.27923e-97	28	MBD2
2.58352e-100	0.43007	0.45	0.076	3.45571e-96	28	SDF2L1
4.86564e-100	-0.529142	1	1	6.50828e-96	28	RPL9
1.26111e-98	0.511233	0.472	0.086	1.68687e-94	28	ENSSSCG00000029066
1.6342e-98	0.305824	0.264	0.026	2.1859e-94	28	CCDC34
2.71804e-98	0.63582	0.789	0.224	3.63565e-94	28	LSM2
5.48224e-98	1.01259	0.994	0.709	7.33305e-94	28	ENSSSCG00000037142
1.92621e-97	-0.496608	1	1	2.5765e-93	28	ENSSSCG00000035080
3.83573e-97	-0.422544	1	1	5.13068e-93	28	ENSSSCG00000031088
5.62287e-97	0.342065	0.339	0.045	7.52115e-93	28	MSH6
2.73781e-96	0.396101	0.431	0.072	3.6621e-92	28	PCBD2
4.68506e-96	0.329611	0.347	0.047	6.26674e-92	28	AKR1B1
8.98571e-96	0.712311	0.842	0.281	1.20193e-91	28	SNRPF
1.20569e-95	0.413665	0.528	0.104	1.61273e-91	28	PPM1G
1.22947e-95	0.594521	0.683	0.173	1.64454e-91	28	LSM6
1.64451e-95	0.350522	0.469	0.084	2.1997e-91	28	ACADM
1.95854e-95	0.512404	0.694	0.172	2.61974e-91	28	ENSSSCG00000007088
7.81587e-95	0.47398	0.603	0.134	1.04545e-90	28	ENSSSCG00000007609
1.24922e-94	0.781379	0.944	0.521	1.67096e-90	28	SNRPE
1.63436e-94	0.624902	0.686	0.178	2.18612e-90	28	ENSSSCG00000006830
1.85196e-94	0.797262	0.944	0.488	2.47718e-90	28	HINT1
2.24442e-94	-0.46352	0.997	1	3.00213e-90	28	ENSSSCG00000035768
6.63438e-94	0.530349	0.55	0.118	8.87415e-90	28	USP1
1.01346e-93	0.732594	0.819	0.263	1.35561e-89	28	TPI1
5.81931e-93	0.371815	0.442	0.077	7.78391e-89	28	MRPL58
9.24307e-93	0.308133	0.364	0.054	1.23635e-88	28	DNAJC9
1.17608e-92	0.375971	0.511	0.1	1.57312e-88	28	SMARCB1
1.33385e-92	0.445682	0.483	0.094	1.78415e-88	28	ENSSSCG00000034129
1.38393e-92	0.328936	0.367	0.055	1.85115e-88	28	PPIL1
1.98898e-91	-0.495045	1	0.999	2.66046e-87	28	RPS9
3.64131e-91	0.347253	0.433	0.076	4.87062e-87	28	ANAPC15
1.4037e-90	0.543408	0.703	0.184	1.87758e-86	28	ENSSSCG00000014031
2.62436e-90	0.701336	0.742	0.214	3.51035e-86	28	CD99
4.77418e-90	0.797404	0.953	0.466	6.38594e-86	28	ENSSSCG00000006395
4.84859e-90	0.621081	0.308	0.041	6.48548e-86	28	GZMK
1.28092e-89	0.668552	0.989	0.729	1.71336e-85	28	COX8A
1.70222e-89	0.303828	0.292	0.036	2.2769e-85	28	LRRC59
2.47393e-89	0.63633	0.719	0.206	3.30913e-85	28	PRDX3
7.47977e-89	0.484038	0.706	0.183	1.00049e-84	28	RPL7L1
3.56591e-88	0.343848	0.464	0.088	4.76976e-84	28	ENSSSCG00000034896
4.40124e-88	0.639341	0.661	0.173	5.88709e-84	28	PLP2
5.01924e-88	0.407942	0.508	0.104	6.71373e-84	28	RNPEP
1.00312e-87	0.750079	0.933	0.435	1.34177e-83	28	DBI
1.26892e-87	0.293813	0.35	0.053	1.69731e-83	28	ENSSSCG00000016679
1.99508e-87	0.252554	0.275	0.032	2.66862e-83	28	WDR76
4.51945e-87	0.404194	0.556	0.122	6.04522e-83	28	PSMD14
6.65417e-87	0.52442	0.708	0.188	8.90061e-83	28	YWHAQ
9.87363e-87	0.511155	0.222	0.021	1.3207e-82	28	LAG3
1.13401e-86	0.267143	0.292	0.037	1.51685e-82	28	ENSSSCG00000012997
2.77552e-86	-0.529961	1	0.995	3.71254e-82	28	ENSSSCG00000039544
2.78451e-86	-0.594521	0.992	0.992	3.72456e-82	28	ENSSSCG00000013597
3.17441e-86	0.369638	0.419	0.076	4.24609e-82	28	ENSSSCG00000031730
3.57333e-86	0.855452	0.947	0.461	4.77969e-82	28	S100A6
2.16507e-85	0.332606	0.486	0.097	2.89599e-81	28	DIABLO
2.32313e-85	0.732598	0.942	0.467	3.10741e-81	28	ERH
2.35977e-85	0.325329	0.3	0.04	3.15643e-81	28	KPNA2
5.11119e-85	0.314331	0.331	0.049	6.83673e-81	28	CRELD2
5.79961e-85	0.725082	0.942	0.468	7.75756e-81	28	ENSSSCG00000002907
4.33187e-84	-0.520366	1	0.996	5.7943e-80	28	ENSSSCG00000017239
4.35701e-84	0.346712	0.517	0.11	5.82793e-80	28	PTGES3
4.41307e-84	0.310992	0.344	0.053	5.90292e-80	28	BAK1
9.10275e-84	0.349319	0.556	0.123	1.21758e-79	28	NDUFA10
2.13985e-83	0.450079	0.642	0.16	2.86226e-79	28	PSMB3
2.23657e-83	0.354585	0.411	0.075	2.99164e-79	28	ETF1
2.37721e-83	0.725301	0.783	0.269	3.17976e-79	28	DYNLL1
3.23503e-83	0.390778	0.55	0.125	4.32718e-79	28	CYB5B
5.38938e-83	0.3459	0.453	0.088	7.20883e-79	28	ICOS
1.51461e-82	-0.490961	0.994	0.996	2.02595e-78	28	ENSSSCG00000025928
1.88638e-82	0.326626	0.525	0.113	2.52322e-78	28	YKT6
6.46826e-82	0.389613	0.55	0.125	8.65195e-78	28	HDGF
6.90523e-82	0.325803	0.447	0.087	9.23643e-78	28	SPTSSA
8.34724e-82	0.27661	0.264	0.032	1.11653e-77	28	EFHD2
1.52796e-81	0.377138	0.522	0.115	2.0438e-77	28	NAA38
1.6971e-81	0.885556	0.508	0.124	2.27004e-77	28	LGALS1
2.00141e-81	0.614202	0.653	0.181	2.67708e-77	28	SIVA1
2.25494e-81	0.715384	0.953	0.56	3.01621e-77	28	COX5B
5.53207e-81	0.563368	0.653	0.188	7.3997e-77	28	TPM4
6.85986e-81	0.480861	0.661	0.177	9.17575e-77	28	NDUFV2
7.70395e-81	0.308234	0.433	0.083	1.03048e-76	28	HADHA
8.17105e-81	0.387457	0.653	0.165	1.09296e-76	28	HNRNPD
1.29189e-80	0.350979	0.558	0.129	1.72803e-76	28	OTUB1
1.78387e-80	0.652697	0.717	0.225	2.38611e-76	28	SLC25A5
1.80028e-80	0.722433	0.917	0.43	2.40805e-76	28	PSMB1
1.92533e-80	0.371636	0.525	0.118	2.57532e-76	28	UCHL3
1.95509e-80	0.453603	0.606	0.151	2.61512e-76	28	LSM3
3.25665e-80	0.494217	0.675	0.183	4.35609e-76	28	LSM8
5.22803e-80	0.32155	0.481	0.1	6.99301e-76	28	NDUFV1
6.86926e-80	0.301908	0.375	0.065	9.18832e-76	28	ACOT7
8.09628e-80	-0.396904	1	1	1.08296e-75	28	ENSSSCG00000036296
1.42058e-79	0.472044	0.731	0.208	1.90016e-75	28	LAMTOR2
1.59867e-79	0.309777	0.45	0.09	2.13838e-75	28	PFKP
1.66976e-79	0.327395	0.475	0.099	2.23347e-75	28	ENSSSCG00000040396
2.02152e-79	0.2891	0.311	0.046	2.70399e-75	28	IQGAP2
2.10126e-79	0.424718	0.561	0.133	2.81064e-75	28	SMC1A
2.33009e-79	0.330358	0.567	0.132	3.11673e-75	28	UFD1
2.40419e-79	0.352183	0.617	0.151	3.21585e-75	28	AP1S1
2.47318e-79	-0.478628	1	0.999	3.30813e-75	28	RPS3A
4.90567e-79	0.871347	0.908	0.45	6.56182e-75	28	VIM
4.94564e-79	0.607117	0.994	0.783	6.61529e-75	28	TPM3
1.18539e-78	0.41469	0.997	0.999	1.58558e-74	28	COX3
1.27497e-78	0.310781	0.381	0.068	1.7054e-74	28	RPP21
2.60616e-78	0.543498	0.683	0.197	3.486e-74	28	ENSSSCG00000010954
2.74718e-78	0.318899	0.378	0.068	3.67462e-74	28	IL2RB
4.23849e-78	0.480766	0.642	0.172	5.6694e-74	28	ENSSSCG00000002449
4.51192e-78	-0.480124	1	1	6.03515e-74	28	RPS16
5.11266e-78	0.399485	0.617	0.156	6.8387e-74	28	SNRPA1
1.03283e-77	0.469483	0.639	0.171	1.38152e-73	28	ENSSSCG00000003885
1.39762e-77	-0.432785	1	1	1.86946e-73	28	RPL10
2.27406e-77	0.341427	0.439	0.088	3.04178e-73	28	ENSSSCG00000000635
5.99169e-77	0.30106	0.361	0.063	8.01449e-73	28	PDCD1
7.5763e-77	0.290828	0.45	0.092	1.01341e-72	28	ETFA
1.00245e-76	0.446114	0.622	0.166	1.34088e-72	28	NDUFB6
2.04864e-76	0.597672	0.983	0.829	2.74026e-72	28	ENSSSCG00000028485
3.42849e-76	0.265486	0.425	0.084	4.58595e-72	28	PDHB
6.08289e-76	0.403434	0.581	0.145	8.13647e-72	28	NDUFA8
9.25573e-76	-0.478084	1	0.996	1.23805e-71	28	ENSSSCG00000011272
9.7113e-76	0.430862	0.647	0.177	1.29898e-71	28	DYNLRB1
1.27702e-75	0.336717	0.533	0.125	1.70815e-71	28	PPP4C
1.50586e-75	0.269297	0.364	0.064	2.01424e-71	28	ADCY3
2.87402e-75	0.277751	0.408	0.079	3.84428e-71	28	CYB561D2
5.12755e-75	0.644934	0.878	0.36	6.85861e-71	28	ENSSSCG00000040857
1.35333e-74	0.273943	0.383	0.071	1.81022e-70	28	RBM14
1.45051e-74	0.301711	0.369	0.067	1.9402e-70	28	AP1M1
1.94164e-74	0.56586	0.825	0.284	2.59714e-70	28	NDUFB7
2.03814e-74	0.337054	0.389	0.074	2.72622e-70	28	LYAR
9.51906e-74	0.444363	0.681	0.193	1.27327e-69	28	ENSSSCG00000027085
1.30038e-73	0.414348	0.542	0.132	1.73939e-69	28	ENSSSCG00000012166
1.59734e-73	0.635599	0.728	0.248	2.1366e-69	28	SRSF7
1.81411e-73	0.308498	0.483	0.108	2.42656e-69	28	PPIH
2.50148e-73	0.345954	0.469	0.104	3.34598e-69	28	ENSSSCG00000033700
3.98712e-73	0.611282	0.972	0.655	5.33317e-69	28	ENSSSCG00000012961
9.47504e-73	0.51478	0.744	0.234	1.26738e-68	28	ENSSSCG00000036658
9.50506e-73	0.419614	0.544	0.136	1.2714e-68	28	MANF
1.01835e-72	0.655211	0.903	0.403	1.36215e-68	28	ENSSSCG00000039582
1.1931e-72	0.576428	0.808	0.284	1.59588e-68	28	ARPC5L
1.27677e-72	0.349158	0.475	0.107	1.70781e-68	28	ENSSSCG00000000849
2.43808e-72	0.413738	0.606	0.162	3.26117e-68	28	SSRP1
6.9292e-72	0.300552	0.525	0.125	9.2685e-68	28	MRPS12
8.48554e-72	0.291433	0.425	0.088	1.13503e-67	28	ENSSSCG00000014296
1.32225e-71	0.398398	0.511	0.123	1.76864e-67	28	GLIPR1
2.79038e-71	0.523722	0.731	0.232	3.73241e-67	28	ELOC
6.4001e-71	0.388867	0.486	0.115	8.56077e-67	28	CD48
2.08323e-70	0.440121	0.628	0.176	2.78652e-66	28	NUDC
2.36067e-70	0.454002	0.689	0.204	3.15763e-66	28	FAM32A
2.91037e-70	0.294415	0.258	0.036	3.89291e-66	28	KIF20B
4.22017e-70	0.315695	0.439	0.096	5.64491e-66	28	PPID
6.59843e-70	0.657502	0.936	0.485	8.82606e-66	28	ENSSSCG00000000405
7.87664e-70	0.272097	0.406	0.083	1.05358e-65	28	NXT1
8.66874e-70	0.486437	0.617	0.176	1.15953e-65	28	HMGA1
1.25847e-69	0.308913	0.508	0.123	1.68333e-65	28	RILPL2
1.3986e-69	0.330923	0.572	0.147	1.87077e-65	28	PLGRKT
1.63893e-69	-0.948086	0.764	0.936	2.19223e-65	28	CD52
2.50357e-69	0.535303	0.75	0.248	3.34877e-65	28	CYCS
4.43683e-69	0.482479	0.692	0.212	5.9347e-65	28	NDUFB2
5.99348e-69	0.268603	0.267	0.039	8.01688e-65	28	MRPL51
7.2335e-69	0.308988	0.406	0.084	9.67553e-65	28	TECR
1.06562e-68	0.281117	0.472	0.108	1.42537e-64	28	DAZAP1
1.14619e-68	-0.909649	0.853	0.925	1.53315e-64	28	PLAC8
1.21511e-68	0.251322	0.286	0.045	1.62533e-64	28	GSR
1.57424e-68	0.492289	1	0.943	2.1057e-64	28	CFL1
1.62576e-68	0.293894	0.508	0.123	2.17461e-64	28	GPI
1.90277e-68	0.359683	0.392	0.081	2.54515e-64	28	CXCR3
2.22954e-68	0.491944	0.625	0.184	2.98224e-64	28	TUBA4A
4.74362e-68	0.564449	0.761	0.265	6.34507e-64	28	ENSSSCG00000034314
5.85522e-68	0.511293	0.772	0.261	7.83194e-64	28	GNAI2
8.31338e-68	0.303355	0.433	0.095	1.112e-63	28	CENPH
1.33112e-67	0.753573	1	0.917	1.7805e-63	28	ACTB
1.50306e-67	0.28046	0.425	0.092	2.0105e-63	28	ENSSSCG00000011798
2.88558e-67	0.390296	0.633	0.184	3.85975e-63	28	PRDX6
3.91675e-67	0.48865	0.731	0.24	5.23905e-63	28	AP2S1
6.25072e-67	0.327175	0.494	0.12	8.36096e-63	28	SPTAN1
8.14184e-67	0.454924	0.633	0.188	1.08905e-62	28	TIMM8B
3.15168e-66	0.294754	0.511	0.126	4.21568e-62	28	ENSSSCG00000008183
4.43337e-66	0.496658	0.819	0.293	5.93007e-62	28	NDUFS8
7.17398e-66	0.311641	0.492	0.12	9.59591e-62	28	SRSF9
8.49724e-66	0.332862	0.561	0.151	1.13659e-61	28	HSBP1
1.4662e-65	0.276297	0.392	0.083	1.96119e-61	28	MRPS23
2.19632e-65	0.32718	0.556	0.147	2.93779e-61	28	CDK4
3.03553e-65	0.367427	0.564	0.152	4.06033e-61	28	MRPL11
3.36707e-65	-0.369759	1	0.998	4.50379e-61	28	ENSSSCG00000039740
6.62827e-65	0.384831	0.661	0.195	8.86598e-61	28	POLR2G
1.13711e-64	0.367557	0.683	0.203	1.52099e-60	28	GLRX3
1.35584e-64	0.272026	0.431	0.098	1.81358e-60	28	ELOF1
1.5377e-64	0.599245	0.897	0.385	2.05683e-60	28	NUCKS1
2.31846e-64	0.328216	0.589	0.162	3.10118e-60	28	EIF1AX
2.34362e-64	0.290896	0.369	0.076	3.13482e-60	28	PIH1D1
3.42323e-64	0.296176	0.55	0.144	4.57891e-60	28	IMP4
4.18323e-64	0.289785	0.317	0.058	5.59549e-60	28	CYP51A1
7.32133e-64	0.316242	0.453	0.109	9.79301e-60	28	ENSSSCG00000006260
7.88414e-64	0.26987	0.475	0.115	1.05458e-59	28	ENSSSCG00000002036
1.22401e-63	0.317971	0.539	0.143	1.63724e-59	28	RIDA
1.51878e-63	0.48962	0.747	0.252	2.03152e-59	28	ILF2
1.85096e-63	0.317566	0.447	0.107	2.47585e-59	28	CTSB
2.8069e-63	0.602634	0.861	0.385	3.7545e-59	28	PSMB2
3.32877e-63	0.474012	0.708	0.234	4.45257e-59	28	SNRPD3
3.43518e-63	0.6378	0.892	0.438	4.5949e-59	28	ENSSSCG00000002550
4.49354e-63	0.251084	0.433	0.1	6.01055e-59	28	UBA1
7.81688e-63	0.577486	0.878	0.362	1.04559e-58	28	ARHGDIA
8.25592e-63	0.681529	0.767	0.312	1.10431e-58	28	S100A11
8.77176e-63	0.290766	0.511	0.131	1.17331e-58	28	ENSSSCG00000006665
8.80591e-63	0.464933	0.692	0.227	1.17788e-58	28	ENSSSCG00000035538
2.02145e-62	0.466537	0.608	0.179	2.70389e-58	28	RAD21
2.33272e-62	0.406666	0.639	0.193	3.12024e-58	28	SUPT4H1
2.78929e-62	0.281984	0.478	0.118	3.73096e-58	28	BCAS2
3.50389e-62	-0.904791	0.894	0.881	4.68681e-58	28	DDX5
4.03521e-62	0.502024	0.817	0.298	5.3975e-58	28	SEC11A
4.18613e-62	0.258536	0.494	0.124	5.59937e-58	28	UXT
6.6463e-62	0.426009	0.503	0.135	8.89009e-58	28	IKZF3
8.15302e-62	0.487518	0.769	0.273	1.09055e-57	28	ENSSSCG00000030295
8.40416e-62	0.514111	0.75	0.268	1.12414e-57	28	NANS
8.54038e-62	0.304074	0.564	0.154	1.14236e-57	28	GHITM
1.90452e-61	0.487487	0.706	0.237	2.54748e-57	28	ENSSSCG00000024313
1.91751e-61	0.406128	0.708	0.228	2.56487e-57	28	NDUFB11
2.08061e-61	0.282741	0.55	0.148	2.78303e-57	28	MTA2
2.26229e-61	0.384099	0.7	0.219	3.02604e-57	28	NDUFS7
2.73044e-61	0.547541	0.753	0.273	3.65224e-57	28	HSPD1
3.8568e-61	0.548988	0.983	0.703	5.15886e-57	28	CALM1
4.20383e-61	0.371841	0.622	0.185	5.62305e-57	28	UCHL5
4.39465e-61	0.323221	0.528	0.142	5.87828e-57	28	EIF2S1
5.82507e-61	0.291061	0.542	0.146	7.79161e-57	28	EMC3
6.44104e-61	0.315207	0.497	0.129	8.61553e-57	28	VCP
7.16439e-61	0.340003	1	1	9.58309e-57	28	ENSSSCG00000012119
9.83112e-61	0.351751	0.678	0.207	1.31501e-56	28	LMAN2
1.3339e-60	0.270096	0.456	0.112	1.78422e-56	28	CHCHD5
1.41162e-60	-0.275707	1	1	1.88819e-56	28	ENSSSCG00000004970
2.33985e-60	0.535295	0.986	0.702	3.12979e-56	28	ARPC3
3.77689e-60	0.485609	0.772	0.279	5.05197e-56	28	UQCR10
4.51924e-60	0.280862	0.411	0.096	6.04493e-56	28	CISD2
5.62433e-60	0.495183	0.994	0.873	7.5231e-56	28	CORO1A
6.39053e-60	0.31746	0.614	0.181	8.54797e-56	28	PARVG
6.92766e-60	-0.369953	1	1	9.26644e-56	28	B2M
8.16851e-60	0.335089	0.589	0.17	1.09262e-55	28	SLIRP
1.4711e-59	0.459854	0.775	0.274	1.96774e-55	28	PSMA4
3.01744e-59	0.597414	0.85	0.365	4.03613e-55	28	EIF3I
3.04352e-59	0.286383	0.411	0.097	4.07102e-55	28	ENSSSCG00000005135
4.28628e-59	0.600219	0.883	0.41	5.73333e-55	28	ATP5MD
5.06617e-59	0.571571	0.95	0.597	6.77652e-55	28	ENSSSCG00000007743
5.49673e-59	0.440599	0.592	0.179	7.35243e-55	28	CSRP1
8.19944e-59	0.256405	0.5	0.131	1.09676e-54	28	ARRB2
8.72806e-59	0.443813	0.769	0.269	1.16746e-54	28	NDUFA1
1.06633e-58	0.556869	0.822	0.317	1.42632e-54	28	CDK2AP2
1.61858e-58	0.27812	0.428	0.103	2.16502e-54	28	RTN4
1.82928e-58	-0.388089	0.997	0.996	2.44685e-54	28	ENSSSCG00000014855
3.40222e-58	0.480452	0.997	0.87	4.55081e-54	28	ARPC2
4.69586e-58	0.415402	0.758	0.263	6.28118e-54	28	ENSSSCG00000016100
4.95777e-58	0.446939	0.997	0.982	6.63152e-54	28	ND4
5.49506e-58	0.275441	0.494	0.131	7.35019e-54	28	RNASEH2B
6.46486e-58	0.344789	0.631	0.192	8.6474e-54	28	NDUFA6
8.66241e-58	0.48692	0.994	0.953	1.15868e-53	28	CYTB
9.8865e-58	0.457389	0.778	0.286	1.32242e-53	28	TMEM258
1.57827e-57	0.445759	0.742	0.259	2.11109e-53	28	PSMB6
1.70265e-57	0.266697	0.503	0.134	2.27747e-53	28	SARS
1.90294e-57	0.465461	0.772	0.283	2.54537e-53	28	PSMB4
2.89857e-57	0.412247	0.722	0.246	3.87713e-53	28	CLTA
4.89328e-57	0.252314	0.286	0.054	6.54525e-53	28	RUNX3
8.02057e-57	-0.324611	1	1	1.07283e-52	28	ENSSSCG00000035811
1.43848e-56	0.359002	0.517	0.145	1.92411e-52	28	TMEM71
1.63824e-56	0.380077	0.622	0.195	2.19131e-52	28	RAC1
1.86234e-56	-0.401127	1	0.989	2.49106e-52	28	ENSSSCG00000008170
1.8783e-56	0.2752	0.519	0.143	2.51242e-52	28	MRPL40
2.21826e-56	0.367358	0.617	0.193	2.96714e-52	28	HDAC1
4.79376e-56	0.54945	0.914	0.465	6.41214e-52	28	MICOS10
5.113e-56	0.379341	0.553	0.164	6.83915e-52	28	ENSSSCG00000038989
7.12567e-56	0.276205	0.589	0.173	9.53129e-52	28	POLR2D
7.24339e-56	0.257634	0.469	0.123	9.68876e-52	28	ATP5F1D
7.79357e-56	0.260327	0.486	0.129	1.04247e-51	28	NOLC1
8.81523e-56	0.303752	0.486	0.132	1.17913e-51	28	ENSSSCG00000006363
1.01492e-55	0.339624	0.581	0.175	1.35756e-51	28	ENSSSCG00000020808
1.02442e-55	0.252235	0.236	0.038	1.37027e-51	28	RHOC
1.40922e-55	0.31256	0.625	0.192	1.88498e-51	28	CYC1
1.6102e-55	0.273889	0.486	0.131	2.15381e-51	28	GNA15
1.66622e-55	0.34355	0.647	0.204	2.22874e-51	28	ENSSSCG00000037869
1.84048e-55	0.58517	0.919	0.491	2.46183e-51	28	COTL1
2.79461e-55	0.316054	0.575	0.17	3.73806e-51	28	PRDX4
3.05918e-55	0.304154	0.614	0.187	4.09196e-51	28	SEC11C
3.82116e-55	0.32738	0.6	0.181	5.11118e-51	28	PTBP1
4.87374e-55	0.275674	0.483	0.13	6.51912e-51	28	ENSSSCG00000033757
5.6413e-55	0.25303	0.569	0.165	7.5458e-51	28	TMEM160
9.78458e-55	0.32722	0.622	0.194	1.30879e-50	28	STOML2
1.02753e-54	0.273798	0.519	0.146	1.37443e-50	28	MRPL43
1.19224e-54	0.370501	0.589	0.18	1.59474e-50	28	POLR2K
1.43709e-54	0.39914	0.722	0.252	1.92226e-50	28	ENSSSCG00000010517
1.84971e-54	0.304456	0.272	0.051	2.47417e-50	28	MT3
2.15147e-54	0.440967	0.7	0.244	2.8778e-50	28	ENSSSCG00000038359
2.4438e-54	0.546757	0.9	0.474	3.26883e-50	28	ATP5F1A
4.00589e-54	0.430178	0.75	0.272	5.35828e-50	28	RALY
5.70928e-54	0.358746	0.736	0.253	7.63673e-50	28	BUD31
6.38347e-54	0.542026	0.914	0.512	8.53853e-50	28	ATP5PF
1.2586e-53	-0.313498	1	0.999	1.6835e-49	28	RPL26
1.41738e-53	0.493444	0.719	0.268	1.89589e-49	28	ENSSSCG00000027826
3.59695e-53	0.290798	0.481	0.134	4.81128e-49	28	ENSSSCG00000039731
4.71173e-53	0.370437	0.678	0.233	6.30241e-49	28	TALDO1
4.9129e-53	0.254313	0.428	0.11	6.5715e-49	28	ENSSSCG00000020777
8.01739e-53	0.419343	0.686	0.237	1.07241e-48	28	ENSSSCG00000000097
1.23877e-52	0.531887	0.847	0.37	1.65697e-48	28	CACYBP
1.29102e-52	0.4204	0.811	0.311	1.72686e-48	28	ENSSSCG00000016711
1.44312e-52	0.273915	0.461	0.125	1.93031e-48	28	NDUFS6
1.50435e-52	0.286216	0.572	0.173	2.01222e-48	28	AHSA1
1.6039e-52	0.543308	0.969	0.583	2.14537e-48	28	ENSSSCG00000017213
1.90781e-52	-0.374686	1	0.997	2.55188e-48	28	RPL6
2.18489e-52	0.38889	0.997	0.961	2.92251e-48	28	ARHGDIB
6.02398e-52	0.308912	0.614	0.195	8.05767e-48	28	ENSSSCG00000017928
7.31787e-52	0.540576	0.897	0.46	9.78838e-48	28	ENSSSCG00000013366
1.07334e-51	0.291703	0.456	0.126	1.4357e-47	28	ENSSSCG00000013232
2.03796e-51	0.355515	0.675	0.231	2.72598e-47	28	PDCD5
2.39554e-51	0.528523	0.939	0.537	3.20428e-47	28	ENSSSCG00000015337
2.40728e-51	0.284371	0.542	0.162	3.21997e-47	28	MDH2
2.61995e-51	0.284401	0.547	0.162	3.50445e-47	28	AURKAIP1
2.98795e-51	0.376088	0.622	0.207	3.99668e-47	28	PRDX2
3.3765e-51	0.383052	1	0.996	4.5164e-47	28	COX2
4.32656e-51	0.288516	0.456	0.125	5.78721e-47	28	EMB
5.92545e-51	0.269766	0.622	0.199	7.92588e-47	28	PDAP1
6.54357e-51	0.335279	0.661	0.222	8.75268e-47	28	ENSSSCG00000010795
6.6406e-51	0.252083	0.472	0.132	8.88246e-47	28	BID
1.05538e-50	0.280262	0.564	0.173	1.41167e-46	28	ENSSSCG00000001505
1.34763e-50	0.253051	0.478	0.134	1.8026e-46	28	NFKBIB
1.63327e-50	0.302682	0.522	0.157	2.18467e-46	28	ST6GALNAC4
1.69121e-50	0.333576	0.597	0.191	2.26216e-46	28	BCAS4
1.75347e-50	0.254467	0.597	0.186	2.34544e-46	28	ENSSSCG00000009145
2.07184e-50	0.552525	0.933	0.564	2.77129e-46	28	COX17
2.18176e-50	0.305052	0.544	0.167	2.91832e-46	28	LXN
3.29819e-50	0.512912	0.919	0.495	4.41166e-46	28	COX5A
5.3179e-50	0.493564	0.883	0.403	7.11322e-46	28	ATP5IF1
5.76894e-50	0.262522	0.547	0.167	7.71654e-46	28	ATOX1
8.05234e-50	0.518937	0.861	0.395	1.07708e-45	28	PPIB
9.28966e-50	0.379878	0.711	0.257	1.24258e-45	28	NDUFB8
9.90893e-50	0.29664	0.547	0.169	1.32542e-45	28	ROMO1
1.20483e-49	0.269542	0.522	0.157	1.61158e-45	28	MISP3
1.22827e-49	0.466314	0.897	0.416	1.64293e-45	28	PSMA7
1.40774e-49	0.265071	0.528	0.158	1.88299e-45	28	MICOS13
1.49695e-49	0.286555	0.658	0.218	2.00231e-45	28	ENSSSCG00000001414
1.67567e-49	0.290609	0.206	0.033	2.24137e-45	28	ENSSSCG00000030300
2.00844e-49	0.405958	0.811	0.317	2.68649e-45	28	ATP5F1C
2.78212e-49	0.267589	0.472	0.135	3.72136e-45	28	ENSSSCG00000002790
4.06498e-49	0.304083	0.556	0.174	5.43731e-45	28	TCP1
7.60563e-49	0.269055	0.428	0.116	1.01733e-44	28	STIP1
9.25992e-49	0.446361	0.878	0.386	1.23861e-44	28	ENSSSCG00000032003
9.39388e-49	0.696117	0.536	0.187	1.25653e-44	28	NKG7
1.01004e-48	0.412898	0.803	0.32	1.35103e-44	28	ENSSSCG00000033212
1.16744e-48	-0.332498	1	0.999	1.56156e-44	28	RPL39
1.97767e-48	0.397251	0.778	0.303	2.64533e-44	28	TGIF2-RAB5IF
2.93434e-48	0.253321	0.5	0.149	3.92498e-44	28	COA3
3.61721e-48	0.268993	0.531	0.162	4.83838e-44	28	ENSSSCG00000023323
3.66299e-48	0.511262	0.822	0.361	4.89962e-44	28	ATP5MC1
4.77371e-48	0.270442	0.567	0.18	6.38532e-44	28	FKBP5
7.06391e-48	0.567511	0.858	0.45	9.44868e-44	28	PKM
8.38834e-48	0.316331	0.647	0.219	1.12202e-43	28	IDH2
1.01071e-47	0.25116	0.558	0.175	1.35193e-43	28	TKT
1.05601e-47	0.276982	0.742	0.273	1.41252e-43	28	VMP1
1.26273e-47	-0.552893	0.981	0.94	1.68903e-43	28	EEF1B2
2.79802e-47	0.344895	0.525	0.165	3.74264e-43	28	ENSSSCG00000034072
4.28429e-47	0.361911	0.753	0.284	5.73066e-43	28	SF3B5
6.63968e-47	0.44217	0.994	0.806	8.88124e-43	28	SLC25A6
8.21086e-47	0.279261	0.589	0.191	1.09828e-42	28	NDUFA11
1.05364e-46	0.391633	0.703	0.263	1.40934e-42	28	TRA2B
1.57934e-46	0.378227	0.7	0.259	2.11253e-42	28	PRELID1
2.11174e-46	0.342283	0.689	0.249	2.82466e-42	28	MRPS25
3.31345e-46	0.26947	0.656	0.223	4.43207e-42	28	ENSSSCG00000003849
4.34189e-46	0.480872	0.764	0.324	5.80771e-42	28	GLIPR2
6.47748e-46	0.26677	0.575	0.188	8.66428e-42	28	CDC42SE1
8.38217e-46	0.415276	0.772	0.308	1.1212e-41	28	LBR
1.32366e-45	0.282029	0.681	0.237	1.77053e-41	28	DDOST
1.43256e-45	0.415329	0.811	0.332	1.91619e-41	28	SF3B6
1.46432e-45	0.337053	0.722	0.268	1.95868e-41	28	ENSSSCG00000013721
1.53623e-45	0.303686	0.544	0.177	2.05486e-41	28	KPNB1
1.57158e-45	0.36137	0.622	0.22	2.10214e-41	28	SH2D1A
1.80378e-45	0.492692	0.867	0.429	2.41273e-41	28	ENSSSCG00000023158
2.81279e-45	1.12927	0.489	0.213	3.76239e-41	28	ENSSSCG00000035520
4.00849e-45	0.400751	0.844	0.356	5.36176e-41	28	PSMA3
9.51943e-45	0.275314	0.631	0.218	1.27332e-40	28	PHF5A
1.2322e-44	0.294398	0.725	0.266	1.64819e-40	28	SRP14
2.07178e-44	0.482121	0.95	0.562	2.77122e-40	28	ENSSSCG00000015710
2.69556e-44	0.298362	0.569	0.191	3.60558e-40	28	NME1
4.51466e-44	0.423388	0.792	0.332	6.03882e-40	28	RBM8A
6.88619e-44	-0.405279	0.994	0.981	9.21097e-40	28	ENSSSCG00000020830
8.77667e-44	0.373832	0.664	0.248	1.17397e-39	28	SMC3
1.0648e-43	0.319369	0.767	0.293	1.42428e-39	28	ENSSSCG00000037143
1.18549e-43	0.595837	0.931	0.626	1.58571e-39	28	HSP90AA1
1.75393e-43	0.413693	0.989	0.802	2.34605e-39	28	COX7B
2.34857e-43	0.412643	0.856	0.379	3.14145e-39	28	UCP2
3.48738e-43	0.278739	0.575	0.194	4.66472e-39	28	CTSD
5.16655e-43	0.30481	0.397	0.114	6.91078e-39	28	CD8A
5.64069e-43	0.346744	0.758	0.297	7.54498e-39	28	UQCRC1
1.48721e-42	0.349322	0.761	0.301	1.98929e-38	28	PSMB7
2.26562e-42	0.311458	0.703	0.262	3.0305e-38	28	EIF3L
2.35696e-42	0.254242	0.619	0.216	3.15267e-38	28	PHB2
4.58325e-42	0.396108	0.842	0.366	6.13056e-38	28	GNB2
6.60012e-42	0.253288	0.694	0.252	8.82832e-38	28	ENSSSCG00000011764
9.16002e-42	0.365254	0.775	0.319	1.22524e-37	28	LAMTOR5
1.34152e-41	0.25847	0.636	0.226	1.79441e-37	28	RBM42
2.49464e-41	0.376979	0.828	0.356	3.33683e-37	28	NEDD8
2.94687e-41	0.336326	0.753	0.3	3.94174e-37	28	ENSSSCG00000034527
6.88141e-41	0.323764	0.736	0.287	9.20457e-37	28	CCT7
6.88356e-41	0.282391	0.717	0.271	9.20746e-37	28	ENSSSCG00000009851
6.96647e-41	0.551508	0.939	0.673	9.31835e-37	28	HSPA8
8.46216e-41	0.424939	0.792	0.359	1.1319e-36	28	ENSSSCG00000006061
9.83211e-41	0.286043	0.594	0.212	1.31514e-36	28	HSPA5
1.13677e-40	0.415237	0.825	0.375	1.52054e-36	28	ENSSSCG00000032166
1.4156e-40	0.33295	0.772	0.313	1.8935e-36	28	NDUFB9
2.757e-40	0.341031	0.611	0.226	3.68776e-36	28	YWHAH
3.5766e-40	0.449791	0.961	0.557	4.78406e-36	28	ENSSSCG00000034019
4.44962e-40	-1.06502	0.467	0.642	5.95181e-36	28	TRAT1
1.01466e-39	0.393199	0.758	0.327	1.35721e-35	28	PSMA6
1.10264e-39	0.392208	0.836	0.378	1.4749e-35	28	TXNDC17
1.61308e-39	0.283141	0.756	0.296	2.15766e-35	28	SNF8
2.09545e-39	0.25627	0.747	0.289	2.80288e-35	28	ENSSSCG00000038364
3.42679e-39	0.329224	0.672	0.262	4.58367e-35	28	MRPL20
7.63468e-39	0.317177	0.789	0.324	1.02121e-34	28	NDUFC1
9.02624e-39	0.320959	0.758	0.309	1.20735e-34	28	ENSSSCG00000010320
1.96589e-38	0.270434	0.764	0.301	2.62957e-34	28	HNRNPR
3.29919e-38	0.34736	0.767	0.326	4.413e-34	28	UQCRQ
5.75674e-38	0.333862	0.764	0.312	7.70021e-34	28	UNC119
6.79082e-38	0.424618	0.906	0.476	9.0834e-34	28	ATP5PB
7.15997e-38	0.407387	0.836	0.405	9.57717e-34	28	ENSSSCG00000001075
7.58856e-38	0.42951	0.967	0.636	1.01505e-33	28	ENSSSCG00000023331
1.86472e-37	-0.386574	0.997	0.998	2.49425e-33	28	ENSSSCG00000001229
2.87723e-37	0.267193	0.767	0.308	3.84858e-33	28	GRB2
3.07933e-37	0.263508	0.717	0.281	4.11892e-33	28	CDKN2AIPNL
3.3848e-37	0.438377	0.925	0.583	4.52751e-33	28	ND3
5.72086e-37	0.303046	0.689	0.272	7.65223e-33	28	MAP2K2
7.46117e-37	0.432615	0.881	0.467	9.98006e-33	28	YWHAZ
8.44053e-37	-0.723528	0.786	0.779	1.12901e-32	28	EIF4A2
1.40539e-36	0.534249	0.978	0.807	1.87985e-32	28	PFN1
1.94202e-36	0.329319	0.989	0.89	2.59765e-32	28	OAZ1
2.01165e-36	-0.310016	1	0.998	2.69079e-32	28	RPS6
2.79722e-36	0.427555	0.908	0.533	3.74156e-32	28	ENSSSCG00000003903
3.1647e-36	0.265624	0.561	0.204	4.2331e-32	28	CALR
4.24675e-36	0.39819	0.961	0.683	5.68046e-32	28	ENO1
4.69056e-36	-0.261243	1	0.997	6.27409e-32	28	KXD1
5.21733e-36	-0.31086	0.997	0.993	6.9787e-32	28	RPL17-C18orf32
9.22152e-36	0.354592	0.781	0.348	1.23347e-31	28	C11orf58
1.01067e-35	0.38818	0.897	0.484	1.35188e-31	28	EIF4A1
1.63667e-35	0.30604	0.822	0.356	2.18921e-31	28	NDUFB10
1.74257e-35	0.268133	0.689	0.274	2.33087e-31	28	POLR2E
4.15309e-35	0.31465	0.789	0.337	5.55517e-31	28	SUCLG1
6.67101e-35	0.284238	0.753	0.316	8.92314e-31	28	PSMB9
8.27716e-35	0.268861	0.472	0.165	1.10715e-30	28	HSH2D
1.35157e-34	0.346398	0.775	0.346	1.80786e-30	28	ENSSSCG00000033653
1.68606e-34	0.291386	0.761	0.324	2.25528e-30	28	DAD1
2.33923e-34	0.412804	0.922	0.524	3.12895e-30	28	SLC25A3
2.93345e-34	0.29305	0.825	0.363	3.92378e-30	28	ACTR2
4.03531e-34	0.295842	0.711	0.296	5.39764e-30	28	NDUFC2
1.41518e-33	0.327044	0.8	0.36	1.89294e-29	28	SLC9A3R1
1.60566e-33	0.350491	0.8	0.369	2.14773e-29	28	ATP5ME
3.80819e-33	-0.868636	0.606	0.73	5.09384e-29	28	LTB
5.1496e-33	0.430082	0.844	0.483	6.8881e-29	28	ENSSSCG00000033733
6.59364e-33	0.357435	0.853	0.42	8.81965e-29	28	WDR1
1.91563e-32	0.554054	0.822	0.551	2.56235e-28	28	GPX1
2.02897e-32	0.396534	0.878	0.496	2.71394e-28	28	SEC61B
2.02964e-32	0.404973	0.958	0.652	2.71485e-28	28	PSMB8
2.26895e-32	0.448406	0.906	0.559	3.03494e-28	28	S100A4
5.68789e-32	1.5351	0.367	0.145	7.60812e-28	28	CCL5
7.11794e-32	0.2919	1	0.956	9.52095e-28	28	H3F3A
8.09786e-32	0.296262	0.892	0.416	1.08317e-27	28	ARPC4
3.30115e-31	-0.708941	0.781	0.728	4.41562e-27	28	EVL
6.86417e-31	0.280536	0.789	0.351	9.18151e-27	28	MRPL57
8.58423e-31	-1.08823	0.322	0.535	1.14823e-26	28	CCR7
1.14922e-30	0.273305	0.825	0.375	1.53719e-26	28	ENSSSCG00000014371
4.21492e-30	-0.645236	0.656	0.775	5.63787e-26	28	ENSSSCG00000033734
4.44316e-30	0.348393	0.878	0.462	5.94318e-26	28	NDUFA13
5.89369e-30	0.363964	0.967	0.66	7.8834e-26	28	LCP1
6.64422e-30	0.290333	0.817	0.377	8.88731e-26	28	ENSSSCG00000037602
1.11498e-29	0.259407	0.778	0.351	1.4914e-25	28	SPCS3
1.78583e-29	0.596797	0.692	0.345	2.38873e-25	28	ISG15
2.28742e-29	0.2715	0.592	0.249	3.05966e-25	28	UBE2L6
3.34345e-29	0.349143	0.978	0.646	4.4722e-25	28	LSP1
8.22059e-29	0.26326	0.828	0.383	1.09959e-24	28	KRTCAP2
8.93343e-29	0.283381	0.806	0.384	1.19494e-24	28	ACP1
1.90239e-28	0.331085	0.906	0.481	2.54464e-24	28	RAP1A
3.45465e-28	-0.295875	0.994	0.987	4.62094e-24	28	RPL3
5.86681e-28	0.285617	0.836	0.418	7.84745e-24	28	ENSSSCG00000033068
7.0129e-28	0.424322	0.758	0.425	9.38045e-24	28	IFI6
7.40015e-28	0.326178	1	0.891	9.89845e-24	28	MYL6
1.02089e-27	-0.438628	1	0.996	1.36554e-23	28	TPT1
1.69846e-27	0.330736	0.858	0.455	2.27186e-23	28	EZR
4.69557e-27	0.259955	0.747	0.343	6.2808e-23	28	ENSSSCG00000021560
4.89088e-27	0.308897	0.867	0.439	6.54204e-23	28	ENSSSCG00000000905
6.2837e-27	0.37403	0.839	0.477	8.40508e-23	28	ENSSSCG00000037081
9.12498e-27	0.260418	0.997	0.993	1.22056e-22	28	COX1
1.22828e-26	0.286879	0.886	0.459	1.64294e-22	28	NDUFB4
2.36727e-26	0.330971	0.931	0.529	3.16647e-22	28	RTRAF
2.91689e-26	0.252363	0.811	0.374	3.90163e-22	28	ENSSSCG00000000273
6.63359e-26	-0.319439	0.983	0.961	8.87309e-22	28	RPL22
6.8563e-26	-0.534485	0.889	0.783	9.17098e-22	28	COX7A2L
3.37316e-24	0.345701	0.767	0.418	4.51194e-20	28	ENSSSCG00000021591
9.89321e-24	0.297965	0.928	0.525	1.32332e-19	28	SAP18
1.07929e-23	0.255054	0.842	0.432	1.44365e-19	28	ENSSSCG00000015040
1.27942e-23	-0.828653	0.683	0.673	1.71136e-19	28	ZFP36L2
1.45e-23	0.309679	0.967	0.671	1.93952e-19	28	GMFG
3.5257e-23	-0.773508	0.608	0.638	4.71597e-19	28	TMEM123
4.17306e-23	0.308179	0.847	0.479	5.58188e-19	28	ECHS1
4.41724e-23	-0.999799	0.069	0.302	5.9085e-19	28	IL7R
8.00893e-23	0.29398	0.961	0.614	1.07127e-18	28	ENSSSCG00000008061
9.13245e-23	-0.330377	0.975	0.943	1.22156e-18	28	ENSSSCG00000013064
1.02524e-22	0.284519	0.956	0.746	1.37136e-18	28	NME2
3.19782e-22	0.278023	0.939	0.607	4.2774e-18	28	ENSSSCG00000010203
5.65116e-22	0.282352	0.883	0.526	7.55899e-18	28	ENSSSCG00000002004
1.0826e-21	0.370301	0.969	0.826	1.44808e-17	28	ND2
1.92687e-21	0.282947	0.961	0.705	2.57739e-17	28	COX7C
2.14221e-21	0.301051	0.903	0.561	2.86541e-17	28	CAP1
5.60943e-21	0.255608	0.983	0.78	7.50318e-17	28	TMA7
1.40702e-20	0.264776	0.894	0.526	1.88203e-16	28	PARK7
6.89427e-20	-0.418218	0.939	0.886	9.22177e-16	28	RPL5
1.28794e-19	-0.80141	0.261	0.442	1.72275e-15	28	TCF7
1.26103e-18	0.287882	0.881	0.518	1.68675e-14	28	ND5
1.40122e-18	-0.309558	0.983	0.974	1.87427e-14	28	UBB
1.91448e-18	-0.398633	0.972	0.908	2.5608e-14	28	ENSSSCG00000001341
1.62634e-16	-0.708341	0.408	0.544	2.1754e-12	28	CTSW
2.58582e-16	-0.35777	0.975	0.896	3.45879e-12	28	PTPRC
4.08446e-16	0.25466	0.928	0.629	5.46338e-12	28	PTPRCAP
1.95073e-15	-0.864909	0.206	0.367	2.60929e-11	28	SELL
1.81662e-14	-0.766077	0.567	0.549	2.42991e-10	28	PNRC1
1.0777e-13	-0.298433	0.969	0.881	1.44154e-09	28	ENSSSCG00000006081
1.16463e-13	-0.766821	0.553	0.534	1.55781e-09	28	PNISR
1.64495e-13	0.293093	0.867	0.606	2.20028e-09	28	HSPE1
1.31512e-12	-0.685562	0.494	0.518	1.7591e-08	28	CD37
1.55e-12	0.261255	0.958	0.795	2.07328e-08	28	ND1
2.35257e-12	-0.274081	0.989	0.925	3.1468e-08	28	ENSSSCG00000033500
7.9925e-12	-0.372688	0.894	0.833	1.06908e-07	28	IFITM3
8.00189e-12	-0.408441	0.975	0.933	1.07033e-07	28	H3F3B
9.66774e-12	-0.380017	0.892	0.796	1.29316e-07	28	PABPC1
1.70658e-11	-0.28346	0.972	0.887	2.28272e-07	28	EEF2
1.85537e-11	-0.430019	0.833	0.707	2.48175e-07	28	CD2
2.8228e-11	-0.844679	0.319	0.399	3.77578e-07	28	LEF1
4.29776e-11	-0.293989	0.942	0.82	5.74868e-07	28	SSR2
4.31305e-11	-0.719382	0.117	0.247	5.76914e-07	28	SCML4
8.07262e-11	-0.853199	0.156	0.279	1.07979e-06	28	ENSSSCG00000026140
3.14452e-10	0.278265	0.242	0.117	4.20611e-06	28	GNLY
3.4479e-10	-0.350012	0.919	0.774	4.61192e-06	28	LAPTM5
4.62521e-09	0.941758	0.311	0.188	6.18668e-05	28	GZMB
1.24173e-08	-0.725876	0.425	0.437	0.000166094	28	ARHGAP15
1.63467e-08	-0.496177	0.803	0.646	0.000218653	28	ITM2B
4.43039e-08	-0.784239	0.272	0.334	0.000592609	28	RCAN3
7.56323e-08	-0.39989	0.833	0.688	0.00101166	28	CTSC
9.15656e-08	-0.695201	0.481	0.454	0.00122478	28	ATRX
2.73727e-07	-0.338407	0.967	0.834	0.00366138	28	SAT1
4.28336e-07	-0.779968	0.203	0.277	0.00572942	28	TSC22D3
4.96764e-07	-0.692179	0.208	0.282	0.00664471	28	PDK1
7.29229e-07	-0.280159	0.919	0.849	0.00975417	28	ENSSSCG00000037885
2.02359e-06	-0.685955	0.197	0.266	0.0270675	28	ENSSSCG00000023792
