# Supplementary material for: Reference transcriptomes of porcine peripheral immune cells created through bulk and single-cell RNA sequencing
Source: bioRxiv preprint, doi:10.1101/2021.04.02.438107, version 1 (2021-04-04)
Supplement: SuppFile14 [file 438107_file08.xlsx]

## Sheet: PW_Error_Rates_GD
Supplementary File 14. Random forest pair-wise analyses of CD2 ɣ𝛿 T-cell cluster. For each model represented below the porcine scRNA-seq cluster IDs compared are shown along with the parameters used and resulting OOB prediction error. Variable importance was assigned by measuring node impurity (Impurity) and using permutations (Permutation). Features that reduced error in predictive accuracy are …
21 vs 6	Type:	Classification
	Number of trees:	500
	Sample size:	1831
	Number of independent variables:	14386
	Mtry:	119
	Target node size:	1
	Variable importance mode:	impurity
	Splitrule:	gini
	OOB prediction error:	23.54 %
21 vs 24	Type:	Classification
	Number of trees:	500
	Sample size:	1177
	Number of independent variables:	14386
	Mtry:	119
	Target node size:	1
	Variable importance mode:	impurity
	Splitrule:	gini
	OOB prediction error:	0.42 %
21 vs 31	Type:	Classification
	Number of trees:	500
	Sample size:	898
	Number of independent variables:	14386
	Mtry:	119
	Target node size:	1
	Variable importance mode:	impurity
	Splitrule:	gini
	OOB prediction error:	2.34 %
6 vs 24	Type:	Classification
	Number of trees:	500
	Sample size:	1754
	Number of independent variables:	14386
	Mtry:	119
	Target node size:	1
	Variable importance mode:	impurity
	Splitrule:	gini
	OOB prediction error:	0.51 %
6 vs 31	Type:	Classification
	Number of trees:	500
	Sample size:	1475
	Number of independent variables:	14386
	Mtry:	119
	Target node size:	1
	Variable importance mode:	impurity
	Splitrule:	gini
	OOB prediction error:	1.42 %
24 vs 31	Type:	Classification
	Number of trees:	500
	Sample size:	821
	Number of independent variables:	14386
	Mtry:	119
	Target node size:	1
	Variable importance mode:	impurity
	Splitrule:	gini
	OOB prediction error:	5.12 %

## Sheet: 6v21_Impurity
Supplementary File 14. Random forest pair-wise analyses of CD2 ɣ𝛿 T-cell cluster. For each model represented below the porcine scRNA-seq cluster IDs compared are shown along with the parameters used and resulting OOB prediction error. Variable importance was assigned by measuring node impurity (Impurity) and using permutations (Permutation). Features that reduced error in predictive accuracy are …
Gene	Impurity
LGALS1	27.1931
S100A4	12.417
S100A11	9.2124
S100A6	6.8654
ITGB1	6.08633
S100A10	4.17979
ENSSSCG00000004970	3.40663
CGA	3.04737
ENSSSCG00000037142	3.02998
COX1	2.91955
ID3	2.89819
ANXA2	2.88165
TMSB10	2.78011
ENSSSCG00000033721	2.25739
NDFIP2	2.17714
ENSSSCG00000014565	2.10094
RPS16	1.97783
C15orf48	1.93312
ATP6	1.91735
B2M	1.88551
COX2	1.77232
VIM	1.69111
RHEX	1.65183
ENSSSCG00000000663	1.61311
PTMA	1.60221
GPX1	1.58887
HLA.DRA	1.57343
COX3	1.56651
CD74	1.44721
LTB	1.41872
LSP1	1.31243
ND4	1.26415
CD247	1.25182
BTG1	1.24434
GATA3	1.21313
TSPO	1.21108
CAMK2N1	1.14512
F2R	1.12254
ENSSSCG00000011272	1.09578
RPS20	1.09414
ENSSSCG00000035080	1.07261
SH3BGRL3	1.01153
RORA	0.993085
AQP3	0.987456
ENSSSCG00000005453	0.958701
EMP3	0.95328
ENSSSCG00000038507	0.92116
ITM2B	0.920546
RACK1	0.918551
ENSSSCG00000036716	0.913587
ENSSSCG00000034617	0.910796
PLP2	0.907698
ENSSSCG00000004489	0.90593
RPS18	0.904541
ENSSSCG00000014855	0.899021
CAPG	0.891767
ID2	0.891511
MT3	0.889952
FAM129A	0.889281
TRDC	0.882745
RPS11	0.880157
RPLP0	0.870487
ENSSSCG00000012119	0.866652
RORC	0.853077
TPT1	0.851864
ENSSSCG00000025928	0.847993
ENSSSCG00000003042	0.84485
ENSSSCG00000032017	0.831616
CD52	0.83079
ENSSSCG00000013597	0.823797
FTL	0.823176
EIF1	0.811944
ANXA5	0.802838
ARF6	0.802731
SLC25A6	0.786233
ENSSSCG00000008433	0.78154
RPL5	0.771558
ENSSSCG00000027573	0.769324
TPM3	0.761565
GLIPR2	0.756303
CYTB	0.75561
DHRS7	0.738594
RPL26	0.729795
RPS27	0.725741
RPS3A	0.725343
ENSSSCG00000040273	0.718778
RPL23	0.715922
SLA.DQB1	0.713603
RPS23	0.709998
RPL11	0.707998
BCAS4	0.705727
CORO1A	0.704635
SRGN	0.699379
CAPZA1	0.697204
CFL1	0.695472
OAZ1	0.694551
RPL22	0.691643
HCST	0.689911
ENSSSCG00000033734	0.689859
RPL10	0.687725
ENSSSCG00000037030	0.683351
ENSSSCG00000036618	0.680986
FLT3LG	0.677675
ENSSSCG00000036296	0.674589
ENSSSCG00000001455	0.673713
EVL	0.67102
UCP2	0.666845
STMN1	0.663819
KXD1	0.660329
H3F3B	0.65431
ENSSSCG00000014569	0.653102
ENSSSCG00000006081	0.649382
ARPC3	0.647177
ENSSSCG00000017509	0.646326
ACTG1	0.641381
EIF4A2	0.63974
ENSSSCG00000031088	0.639042
TRAT1	0.628627
MISP3	0.627287
RPL39	0.619527
RPS21	0.618574
VPS28	0.613263
HSP90AB1	0.612464
ENSSSCG00000003520	0.60891
MYL6	0.60764
ENSSSCG00000017239	0.606711
ENSSSCG00000016737	0.60352
RGS19	0.601163
ENSSSCG00000029596	0.597066
LCP1	0.595944
ENSSSCG00000013064	0.595781
PABPC1	0.595212
RPS14	0.594705
CD1D	0.592096
RPL35	0.591977
ENSSSCG00000001341	0.591557
NME2	0.591343
PNISR	0.591162
SAMHD1	0.588838
PRKCB	0.582555
H3F3A	0.58071
CALM1	0.580289
ATP5MC2	0.579482
RPL9	0.572692
RPL7	0.569732
IFITM3	0.568551
EEF1D	0.567502
CD99	0.566267
ARHGDIB	0.565977
ENSSSCG00000033500	0.565377
RPL6	0.563102
CD3G	0.563095
ENSSSCG00000029830	0.559098
ENSSSCG00000039046	0.557589
RPL17.C18orf32	0.555451
TXNIP	0.553475
UBB	0.552533
RPLP2	0.551829
ENSSSCG00000003930	0.548172
IL7R	0.547639
ATP5F1E	0.546004
BTF3	0.545299
RPS15	0.544603
HSD11B1L	0.543012
ATP5F1A	0.540755
RPS5	0.539436
EEF1B2	0.536181
COX8A	0.533257
ENSSSCG00000039740	0.53165
RPL3	0.531413
CTSW	0.530286
ENSSSCG00000032003	0.529165
ENSSSCG00000009303	0.528882
PSMB9	0.525682
ENSSSCG00000009772	0.52445
PFN1	0.523223
SSR2	0.517851
ND2	0.516796
LIMD2	0.516508
ANXA1	0.515582
RPSA	0.515068
COX7B	0.510524
KLF2	0.507819
RPS13	0.507419
ENSSSCG00000014540	0.506591
ITGA4	0.504179
RPL34	0.503559
LAPTM5	0.503399
ENSSSCG00000020830	0.498198
DDX17	0.496963
ENSSSCG00000001229	0.493265
RPL10A	0.488252
RPS9	0.486011
ENSSSCG00000035811	0.485206
ENSSSCG00000024974	0.484296
ENSSSCG00000034448	0.480741
CD63	0.479919
ENSSSCG00000033697	0.479295
ENSSSCG00000039544	0.478986
TUBA1B	0.477966
COX6C	0.477295
ENSSSCG00000013366	0.476942
ENSSSCG00000011952	0.476207
ENSSSCG00000008170	0.475332
GABARAP	0.473919
RPS12	0.472723
RPS6	0.472583
RPS4X	0.468486
ENSSSCG00000033019	0.467255
ENSSSCG00000000657	0.466959
PARK7	0.46535
RPS10.NUDT3	0.465284
ENSSSCG00000033909	0.462228
ABLIM1	0.462188
ND1	0.461133
HSP90AA1	0.460268
RAC2	0.459297
ARPC2	0.457573
ENSSSCG00000039460	0.45565
TBC1D10C	0.454308
SAT1	0.452201
ENSSSCG00000003691	0.451934
GZMB	0.45075
ENSSSCG00000036096	0.448438
HNRNPK	0.44708
ENSSSCG00000028485	0.446182
TPI1	0.445329
ZAP70	0.443129
VASP	0.442976
MIF	0.441924
HSPB1	0.441223
PSMB10	0.438226
RPS26	0.437112
ENSSSCG00000039071	0.436682
ENSSSCG00000013889	0.43594
RPL36AL	0.435657
YBX3	0.43521
CD53	0.433588
ENSSSCG00000035768	0.43332
ENSSSCG00000031773	0.431709
ENSSSCG00000035507	0.43038
CD47	0.429066
DDX5	0.427989
ENSSSCG00000032556	0.427567
NOP10	0.426746
EEF2	0.426355
ENSSSCG00000004945	0.424271
MICOS10	0.420021
RPL7A	0.419795
SRSF5	0.419148
ACTB	0.418772
CD3E	0.417438
PTPRC	0.414636
COX4I1	0.413701
NDUFS7	0.412969
GMFG	0.412563
RETNLB	0.409241
RPL27	0.406653
HSPA8	0.406332
CD9	0.406329
CIRBP	0.404311
ETS2	0.40419
ENSSSCG00000002550	0.403616
UBE2D3	0.400861
PLAAT3	0.40078
CD38	0.399946
PPP1CC	0.399268
IFI6	0.397958
ENSSSCG00000016758	0.397833
ISCU	0.396956
BLK	0.395269
COX7C	0.394181
PLAC8	0.393249
COX5B	0.392357
MYO1G	0.390085
ENSSSCG00000000071	0.386764
ENO1	0.385791
ENSSSCG00000013661	0.384948
CTSD	0.384159
SLC25A3	0.383211
TRAF3IP3	0.381898
RPS17	0.381623
PNRC1	0.380898
ENSSSCG00000037885	0.380313
ARPC1B	0.379781
RNF181	0.379243
SMIM19	0.377549
TRA2B	0.376448
NAP1L1	0.376058
PTPRCAP	0.374826
PTPN18	0.374749
S100A13	0.374642
TMEM123	0.374589
TUBB	0.368429
HVCN1	0.368048
SUMO2	0.367411
SF3B5	0.367406
UBXN1	0.365516
ENSSSCG00000039706	0.364896
EIF3K	0.364485
EML4	0.364219
GAPDH	0.363195
CD81	0.363194
ENSSSCG00000001779	0.362692
ENSSSCG00000023331	0.362257
PLEKHF2	0.361812
CCT5	0.361516
ENSSSCG00000004145	0.361121
NDUFA13	0.360575
OSTF1	0.360304
ENSSSCG00000037081	0.359749
ATP5MD	0.358843
ENSSSCG00000030300	0.358143
HYPK	0.357897
C12orf75	0.357699
ENSSSCG00000007743	0.357658
ENSSSCG00000028479	0.357573
DNAJA1	0.356743
ENSSSCG00000010203	0.356241
CSTB	0.356115
TMA7	0.354558
RPL37	0.354199
ATP5PO	0.353679
ENSSSCG00000008061	0.351781
SMDT1	0.351032
EIF3E	0.350657
ENSSSCG00000036350	0.350236
ENSSSCG00000037775	0.350219
TIMP1	0.349715
HBB	0.348533
CFLAR	0.347309
GPR174	0.347276
ARPC5	0.347253
ECHS1	0.347213
NPM1	0.346991
2021-09-07	0.344848
MRPS25	0.344323
RAP1B	0.344321
RABAC1	0.343938
COX6A1	0.343914
ENSSSCG00000038364	0.343688
LZTS1	0.343232
ATP6V1G1	0.343141
ENSSSCG00000005656	0.342358
NDFIP1	0.342286
SEC61B	0.342104
HMGN2	0.341464
ENSSSCG00000021591	0.341444
2021-09-01	0.341034
RHOA	0.339924
EIF4B	0.339646
CAPZB	0.339454
DAAM1	0.338722
GPSM3	0.337988
SAP18	0.337572
SNRPE	0.337399
GPR183	0.336878
FCGRT	0.3361
YWHAZ	0.335804
CST7	0.335145
ENSSSCG00000024263	0.334795
ENSSSCG00000012961	0.333799
SON	0.333633
ENSSSCG00000002907	0.332072
GABARAPL2	0.331993
EMD	0.331594
MBNL1	0.331028
ENSSSCG00000000405	0.330957
PLVAP	0.330935
ENSSSCG00000039658	0.330424
CD37	0.330256
ENSSSCG00000038711	0.330198
ENSSSCG00000026140	0.329362
ENSSSCG00000007188	0.328726
BIN2	0.328448
ENSSSCG00000035256	0.328311
TMOD3	0.32812
EIF2B2	0.326716
PSME1	0.324637
SPCS3	0.324524
RBM39	0.322971
HINT1	0.322694
CNBP	0.321068
RGCC	0.321013
ENSSSCG00000022176	0.320522
TRAPPC5	0.320359
ENSSSCG00000017213	0.319535
ACOT13	0.318912
PSMA3	0.316293
UBE2V1	0.315489
EZR	0.315086
ENSSSCG00000011234	0.314665
ND5	0.314549
YWHAH	0.314037
NDUFS5	0.313478
CAP1	0.313441
ENSSSCG00000020790	0.313228
PSIP1	0.313095
RASA3	0.312948
CCND3	0.312493
MGST1	0.312161
NDUFC2	0.31183
HNRNPC	0.311273
ST6GALNAC4	0.31109
PSMB8	0.310939
SPCS1	0.310279
TLE5	0.309901
SSR4	0.309828
CAMK4	0.309733
MAP2K2	0.309041
HNRNPDL	0.308739
SRSF2	0.307978
H2AFV	0.307964
NOP53	0.307808
KRTCAP2	0.307784
ENSSSCG00000001398	0.307077
MATK	0.305593
PNN	0.305528
DDIT4	0.305329
ENSSSCG00000013596	0.305299
ENSSSCG00000001075	0.30448
CMAS	0.30385
PSMB7	0.303537
ELF1	0.302802
RHOG	0.302574
COX7A2L	0.302136
2021-09-06	0.301776
ENSSSCG00000034019	0.301596
SSBP4	0.301222
TMEM50A	0.301118
SASH3	0.299231
GNB2	0.29675
ENSSSCG00000013992	0.296643
SERBP1	0.29592
ND3	0.295549
PTP4A2	0.295235
ETS1	0.294093
MRPL57	0.293835
SRSF6	0.29362
ENSSSCG00000037595	0.293617
CDK2AP2	0.292195
HMGB2	0.292163
RASSF1	0.291949
ENSSSCG00000024776	0.290682
ENSSSCG00000005768	0.290579
YWHAB	0.290286
SUSD3	0.289479
SEC11C	0.288705
2021-09-11	0.288702
ENSSSCG00000004963	0.288593
LAMTOR5	0.288586
DAPK2	0.288391
CD5	0.287476
TMEM173	0.286708
PIK3AP1	0.286574
CIR1	0.285699
ENSSSCG00000034914	0.284859
RNPS1	0.284119
ENSSSCG00000023792	0.284108
ENSSSCG00000039582	0.283491
HSPA5	0.283346
NDUFB4	0.282598
TOMM7	0.282177
RAP1A	0.281939
ENSSSCG00000009327	0.2819
RAN	0.281644
NDUFB9	0.28106
HNRNPM	0.280897
ESD	0.280231
ENSSSCG00000000576	0.280018
PRKACB	0.279999
RDX	0.279923
SSB	0.279576
EIF4A1	0.278891
JAK1	0.278752
HMGN3	0.278676
PTPN1	0.278458
ENSSSCG00000000273	0.278288
ENSSSCG00000018061	0.278111
SF3B1	0.277643
PKM	0.277242
GRB2	0.277106
ENSSSCG00000007088	0.27676
ITGB7	0.276714
SRRM2	0.276249
ENSSSCG00000006395	0.275686
ACP5	0.275535
GUK1	0.275459
SNX10	0.275126
SUMO1	0.274938
CFDP1	0.274635
PSMB4	0.274358
ZRANB2	0.274357
SRSF10	0.274124
NUCKS1	0.274072
ENSSSCG00000023158	0.273447
POLR2F	0.27344
KARS	0.273349
TAGAP	0.273328
ENSSSCG00000031912	0.273094
RTRAF	0.272982
GPX4	0.272956
DYNLL1	0.272616
ENSSSCG00000007688	0.272328
ZFP36L2	0.271569
SEC61G	0.270839
ENSSSCG00000033744	0.269833
PPP1R18	0.269315
CCT3	0.269279
ENSSSCG00000025499	0.269121
ATRX	0.268676
SAMSN1	0.268001
ACP1	0.266981
IQGAP2	0.266972
CD84	0.266317
TRAF1	0.26628
ATF4	0.265715
ITGB2	0.265498
CYFIP2	0.26528
OCIAD1	0.264171
ATP5PB	0.263928
MPG	0.263807
PSMB1	0.263786
MVP	0.263603
DDT	0.263416
PTPN6	0.263112
NDUFC1	0.262842
TMBIM6	0.260958
HSH2D	0.260851
SLC11A2	0.260627
COX5A	0.260382
ENSSSCG00000034527	0.260175
COX17	0.259884
ENSSSCG00000040118	0.259423
LAT	0.259085
YWHAQ	0.258974
ACBD6	0.258816
GRAP2	0.258681
CCT7	0.258548
ENSSSCG00000003253	0.25797
ENSSSCG00000016990	0.257934
ENSSSCG00000033733	0.257573
HM13	0.257175
ENSSSCG00000014075	0.256928
SRP19	0.256332
ENSSSCG00000027074	0.256151
TNFAIP8	0.255113
CITED2	0.254959
SIT1	0.254876
ENSSSCG00000000905	0.254517
SKAP1	0.254391
CD3D	0.254335
ENSSSCG00000012397	0.254031
TUBA4A	0.253782
PNRC2	0.253464
PPP4R3B	0.25332
ZMAT5	0.252842
MIEN1	0.252605
ZFP36	0.2525
NMRAL1	0.251651
FCER1A	0.251631
FKBP3	0.251573
TCF7	0.251009
ENSSSCG00000023126	0.250756
DBI	0.250555
ITSN2	0.250539
TPM4	0.250233
TSC22D3	0.250141
POLR1D	0.250058
YTHDF2	0.249731
TRAM1	0.249504
SELL	0.249384
SEC62	0.249372
ENSSSCG00000024313	0.249314
CCNI	0.249213
ENSSSCG00000015040	0.248834
C12orf10	0.248737
EIF2S2	0.248652
ENSSSCG00000035162	0.248476
VAMP5	0.247634
ENSSSCG00000003903	0.247581
EIF2A	0.247406
SNAPIN	0.247147
ENSSSCG00000001407	0.24695
ARID4B	0.246418
ATP5PF	0.246302
MTCH1	0.246152
NOL7	0.246118
VAMP8	0.245074
KIF5B	0.244572
CNN2	0.244479
LEF1	0.244401
ARHGAP30	0.244317
ENSSSCG00000039581	0.243933
SELENOF	0.243637
HIGD2A	0.243548
RCAN3	0.242415
ENSSSCG00000036658	0.242181
EPSTI1	0.242074
ACTR2	0.24144
SFT2D1	0.241177
PTPN7	0.241021
ENSSSCG00000015814	0.24089
CDC123	0.240825
PDCD10	0.240254
PRKAR1A	0.24019
S100A1	0.239962
SCG5	0.239572
PRDX2	0.239513
TPR	0.2392
ENSSSCG00000036114	0.23834
ENSSSCG00000034314	0.237899
EIF3I	0.237897
TGIF2.RAB5IF	0.237425
ENSSSCG00000003914	0.237154
LBR	0.237121
ATP5ME	0.236986
NONO	0.236588
ENSSSCG00000015337	0.23645
FOXS1	0.236186
C11orf58	0.236097
ATP5MC3	0.235567
HNRNPH3	0.235487
CST3	0.235221
PSMA7	0.235069
LRCH4	0.234411
CD44	0.234127
ENSSSCG00000036988	0.234087
IAH1	0.233665
EIF1B	0.233572
ATP6V1E1	0.233272
ENSSSCG00000013721	0.232618
SDF4	0.232256
BZW1	0.232211
RALBP1	0.231793
CCND2	0.231344
PRRC2C	0.231288
HSPE1	0.231195
UBL4A	0.230993
RASGRP1	0.230555
ENSSSCG00000014371	0.230533
HNRNPH1	0.229642
MDM4	0.229476
ENSSSCG00000033068	0.229274
ENSSSCG00000037143	0.228989
ARGLU1	0.22876
BCLAF1	0.228748
SH3BGRL	0.228526
SFPQ	0.22825
TAPBP	0.227781
POLR2G	0.227117
CNPY2	0.226683
ASNA1	0.226386
ENSSSCG00000017555	0.226163
TCF25	0.225759
ENSSSCG00000001456	0.225451
HNRNPU	0.225322
ITM2C	0.225231
CCNG1	0.224926
SKP1	0.224742
EXOSC1	0.224548
SLA2	0.224035
ILK	0.223919
CCT2	0.223862
CXCR4	0.223724
ROCK1	0.223636
ENSSSCG00000011764	0.223527
LSM6	0.223057
LSM2	0.222598
CAST	0.222586
MYO1F	0.222257
EIF3H	0.221961
TWF2	0.221952
ARF4	0.221919
BIRC3	0.221438
NPC2	0.221159
UBC	0.220954
PLOD3	0.220868
MGST3	0.220833
RPL26L1	0.22073
PPIB	0.220615
REX1BD	0.220468
SNF8	0.219926
BST2	0.219793
CETN3	0.219654
ATP5IF1	0.219506
GLRX3	0.218554
COPS2	0.21849
ARPC4	0.218174
TNNI2	0.218127
CCPG1	0.218103
JAML	0.217915
ARL6IP1	0.217595
DDX46	0.217487
ENSSSCG00000027196	0.216702
SUCLG1	0.216699
ENSSSCG00000020777	0.216625
ENSSSCG00000012916	0.216503
PUF60	0.216494
RTF1	0.21634
ENSSSCG00000001097	0.216068
PSMB6	0.215514
RALY	0.21519
PFDN1	0.215087
ENSSSCG00000033987	0.21445
ENSSSCG00000039249	0.214363
ENSSSCG00000016262	0.214273
SCAF11	0.21412
DNAJC8	0.213745
PAIP2	0.213649
LSM14A	0.213444
ARRB2	0.21323
ENSSSCG00000023584	0.213031
PSMA4	0.2128
IGFBP2	0.212349
GPI	0.212223
TMEM258	0.212027
SNRPN	0.211991
CUTA	0.211953
EWSR1	0.211704
ENSSSCG00000002004	0.211699
CSK	0.211301
ENSSSCG00000040857	0.211167
RALGAPA1	0.210915
CTSA	0.210877
SMC4	0.210828
UQCC2	0.210597
ZNF277	0.210587
ENSSSCG00000037602	0.210511
EIF4G2	0.21041
RNF10	0.210372
ENSSSCG00000007978	0.210201
ARL6IP5	0.209838
DOCK8	0.209563
CTSH	0.209409
DYNLT3	0.209143
NDUFB10	0.20907
SNRPD3	0.209059
ENSSSCG00000001396	0.208933
MTDH	0.208721
ENSSSCG00000015710	0.208547
ANKRD10	0.208546
RAP2B	0.207826
ATP5MC1	0.207704
ENSSSCG00000014343	0.207401
PSMC3	0.207209
DDX18	0.207139
CTSC	0.20681
HIKESHI	0.206782
ISG15	0.206595
SNX3	0.206485
RASAL3	0.206394
CHRAC1	0.206165
RANBP1	0.20598
DAD1	0.205924
UNC119	0.205852
2021-09-09	0.205831
THRAP3	0.204957
GNG2	0.204946
ATP5F1C	0.204497
GLUD1	0.203935
ENSSSCG00000011237	0.203893
EMC6	0.2038
ENSSSCG00000018063	0.203766
SOD1	0.203673
ARHGAP4	0.203581
LAMTOR4	0.203526
PRELID1	0.203128
ENSSSCG00000003885	0.202802
ENSSSCG00000014031	0.202793
ENSSSCG00000032166	0.202755
CDC37	0.202369
TADA1	0.202197
ENSSSCG00000035520	0.201911
HPF1	0.201858
TIMM13	0.201817
STK17B	0.201723
CCR8	0.201688
IL2RA	0.201501
ENSSSCG00000009851	0.201386
MSN	0.201078
LAX1	0.200946
ENSSSCG00000010685	0.200857
GCHFR	0.200807
FAXDC2	0.200577
MAP1S	0.200535
ENSSSCG00000012757	0.200518
ENSSSCG00000029857	0.200475
MAX	0.200447
ENSSSCG00000038359	0.200336
SRI	0.200059
TALDO1	0.200027
CHCHD7	0.200003
SYNCRIP	0.19941
CDKN2AIPNL	0.19919
PSAP	0.19902
PFDN2	0.198626
MRPL12	0.198624
UQCRC1	0.198471
KRAS	0.198453
BRK1	0.198382
ENSSSCG00000000697	0.198246
ENSSSCG00000013720	0.198223
TBCA	0.198221
BAD	0.198118
TAX1BP1	0.19806
CHD3	0.198023
RASGRP2	0.198004
PSMA6	0.197986
G3BP1	0.197967
DDX39B	0.197521
PTPN22	0.197315
SCAND1	0.197127
ENSSSCG00000001038	0.197122
ENSSSCG00000039731	0.19675
SUPT4H1	0.196675
STAT1	0.196665
SAFB2	0.196563
TRMT112	0.196509
NDUFB8	0.196488
PRKD3	0.19642
ENSSSCG00000033272	0.19626
RNASEH2C	0.196044
ENSSSCG00000039407	0.195996
PCBP2	0.195419
ZNHIT1	0.195398
NOP56	0.195294
BAG1	0.195243
ELK3	0.195134
ORMDL3	0.194934
ENSSSCG00000002259	0.19485
RNH1	0.194845
MED21	0.194824
ENSSSCG00000016263	0.194617
TNFRSF1B	0.194298
ARHGAP25	0.194183
IFI44L	0.193981
C6orf62	0.193875
MRPL17	0.193538
LBH	0.19351
ENSSSCG00000011117	0.193456
TRIM22	0.193249
S1PR1	0.193128
TAF1D	0.193011
MAT2A	0.19281
SRP14	0.192531
THYN1	0.19223
CCAR1	0.192073
SLC25A24	0.191768
PRMT1	0.191676
RFC2	0.191629
NDUFS8	0.191552
ENSSSCG00000013436	0.191539
ENSSSCG00000033653	0.191535
ENSSSCG00000012811	0.19151
IL9R	0.191475
TM2D1	0.191391
SLC9A9	0.191364
SAMD9	0.191316
BLOC1S1	0.190954
SLAMF7	0.190914
ENSSSCG00000001414	0.190398
SDHD	0.190371
ENSSSCG00000028663	0.190284
NDUFA6	0.190174
TMEM50B	0.189877
ENSSSCG00000005518	0.189717
DMAC2	0.189717
TXNDC17	0.189706
TLN1	0.18963
VPS4B	0.188901
NAA20	0.188855
FAM160B1	0.188801
ENSSSCG00000006628	0.188427
USP14	0.188405
ENSSSCG00000027778	0.188249
CYCS	0.188165
ENSSSCG00000027675	0.18769
ARHGAP15	0.187671
ILF2	0.187632
ENSSSCG00000010320	0.187627
EIF3D	0.187536
NDUFA1	0.187498
STK4	0.187224
RFXANK	0.187182
CASP6	0.187014
ENSSSCG00000027565	0.18697
CGGBP1	0.186708
GM2A	0.186484
CAPZA2	0.186459
ENSSSCG00000016711	0.186248
ENSSSCG00000001063	0.186194
CALR	0.186148
ENSSSCG00000013453	0.185804
SSR3	0.185689
RBM8A	0.185499
ANKRD12	0.185428
ENSSSCG00000021560	0.185395
RSBN1L	0.185344
MTMR6	0.185099
MRPL43	0.185023
ENSSSCG00000013315	0.184313
FKBP11	0.184299
TPST1	0.184111
RSL1D1	0.184101
ARF3	0.183693
ENSSSCG00000035728	0.183486
IK	0.18346
POMP	0.183358
ENSSSCG00000006418	0.183176
FAM43A	0.182907
TOB1	0.182726
ENSSSCG00000030295	0.182541
ENSSSCG00000007355	0.18244
LXN	0.182281
NEDD8	0.182046
FAM32A	0.181811
MED10	0.181696
HNRNPR	0.181676
ADH5	0.181669
ENSSSCG00000006061	0.181364
TUBB2B	0.181339
CPNE1	0.18123
STXBP3	0.181147
WASF2	0.181133
GSPT1	0.181085
FOS	0.180986
IQGAP1	0.18091
RBBP4	0.180739
TMED4	0.180665
CSNK1A1	0.180578
MFAP1	0.180364
NTAN1	0.180342
UBXN11	0.180047
MCRIP1	0.179952
SLU7	0.179841
ENSSSCG00000033212	0.179739
RAB7A	0.179602
ENSSSCG00000035544	0.179592
CYBA	0.17958
ENSSSCG00000035538	0.179467
MRPL40	0.179202
GPR171	0.178802
VPS29	0.178705
ENSSSCG00000004446	0.17868
ENSSSCG00000027826	0.178676
ENSSSCG00000031897	0.178625
ENSSSCG00000031580	0.178615
MFNG	0.178512
RAF1	0.17815
POLR2I	0.178036
RASA1	0.177819
PVRIG	0.177804
BATF	0.177747
RTF2	0.177686
CRYBG1	0.177586
NDUFB2	0.177293
PPP2R1A	0.177172
CRLF3	0.177159
ENSSSCG00000012166	0.177113
PSMC6	0.17709
PTP4A1	0.177075
SERP1	0.176919
ATG5	0.176779
PHB2	0.1767
VTA1	0.176604
PSMC4	0.176593
RSRC2	0.176508
CMTM3	0.17616
RRAGC	0.175545
BBX	0.175496
PKN1	0.175473
STXBP2	0.175389
MMADHC	0.175383
HCLS1	0.175201
ENSSSCG00000016475	0.174788
SRSF4	0.174349
ENSSSCG00000014850	0.174158
SETD5	0.174114
MKNK1	0.174015
PRMT3	0.173864
NKG7	0.173615
LYPLA2	0.173525
ENSSSCG00000036491	0.173488
DNAJC10	0.173325
SPTBN1	0.173074
RNF13	0.172933
SERPINF1	0.172636
ENSSSCG00000034709	0.172515
PRPF40A	0.172204
OPTN	0.172155
ZNF683	0.171918
MDFIC	0.171784
ARID5B	0.171509
GDI2	0.1715
CDC5L	0.171448
CHMP4B	0.171236
KMT2E	0.171138
RPP25L	0.170935
SH3KBP1	0.170674
CYP51A1	0.170589
FBL	0.170306
ERH	0.170186
PPP2CA	0.169981
UBE2B	0.169887
NUB1	0.169728
RBX1	0.169726
RSBN1	0.169627
ENSSSCG00000002898	0.169591
ENSSSCG00000013232	0.169476
ENSSSCG00000002743	0.169051
NIPAL3	0.168909
FUT7	0.168836
RNF115	0.168574
COX7A2	0.168448
CD86	0.168255
RIOK3	0.16805
SP110	0.167762
PHF5A	0.167729
SF3B6	0.167378
SSRP1	0.167204
STAG2	0.167161
DDX6	0.16707
CANX	0.166826
RBMX	0.166796
LONP1	0.166706
MAP4K4	0.166498
MAP4K2	0.166419
FUS	0.166389
PDIA6	0.166262
ATP6V1F	0.166216
ENSSSCG00000016330	0.165873
NCL	0.165756
ENSSSCG00000040827	0.165734
TMEM30A	0.165696
WDR82	0.165638
CSDE1	0.165268
CUEDC2	0.165084
SIGIRR	0.165043
PAK2	0.164969
NSD3	0.164966
SDCBP	0.164837
TMEM9B	0.164601
CYC1	0.164555
GRK6	0.164528
ATP5F1D	0.164465
IVNS1ABP	0.164364
ANAPC16	0.164298
ENSSSCG00000010795	0.164154
AIMP1	0.164079
SPAG8	0.164004
CORO1C	0.16399
LY9	0.163944
PARP8	0.163857
REEP5	0.163802
ENSSSCG00000023323	0.163505
NDUFB7	0.163482
STOML2	0.163233
MRPL11	0.162801
ENSSSCG00000010158	0.162656
ARPC5L	0.162649
NBN	0.162633
HP1BP3	0.162588
IRF2	0.162186
C19orf53	0.162084
ENSSSCG00000013052	0.162075
RHEB	0.161988
DPP4	0.161933
SPEN	0.161852
SETD3	0.16183
TMEM59	0.16176
NAPRT	0.161751
CLTB	0.161719
DPY30	0.161574
SF3A1	0.1615
GSN	0.161173
MAPK1IP1L	0.161029
RPN1	0.160939
CTCF	0.16084
ATP6V0C	0.160739
ELOVL5	0.160708
NDUFAF3	0.160689
GTF2H5	0.160363
CHD2	0.160331
PET100	0.160319
MICOS13	0.160192
EGFL8	0.160165
ENSSSCG00000017032	0.160104
ELOC	0.160004
ENSSSCG00000037399	0.159998
PAG1	0.159964
AIP	0.159892
ENSSSCG00000011290	0.159722
RCSD1	0.159711
ALOX5AP	0.159599
VAPA	0.159419
DCTN6	0.159318
ENSSSCG00000034190	0.159296
ENSSSCG00000009625	0.159194
WDR1	0.159024
ENSSSCG00000015305	0.158939
ZCCHC17	0.158884
PSMB2	0.15874
SNU13	0.158505
MRPS35	0.158458
RAB5C	0.158442
PTP4A3	0.158308
SLC38A2	0.158291
BDH2	0.158179
ENSSSCG00000026064	0.158078
LAMP1	0.158073
GYPC	0.158067
IRF5	0.158036
TNRC6B	0.158025
TP53	0.158015
UBE2A	0.157934
LAPTM4A	0.157841
DUSP1	0.15771
ENSSSCG00000013650	0.157696
ACYP1	0.157676
CAMTA2	0.157603
SF3B2	0.157267
EIF3L	0.157093
WDR45	0.157041
NPRL2	0.157013
U2SURP	0.156948
BCCIP	0.156806
LGALS3BP	0.156781
VCL	0.156763
CCR4	0.156449
RIDA	0.156376
PSMD14	0.155719
RAB2A	0.155705
RAB5A	0.155695
RHOH	0.155674
ENSSSCG00000033757	0.155465
RAB6A	0.155306
BCAP31	0.155299
ENSSSCG00000011676	0.155298
AIG1	0.155244
H2AFZ	0.155142
DBNL	0.155108
ENSSSCG00000006665	0.155106
RESF1	0.154902
CCT4	0.154754
COMMD1	0.154731
NDUFAF8	0.154714
SLIRP	0.154708
FIP1L1	0.154691
CEBPZOS	0.154586
KTN1	0.154402
PLSCR3	0.154325
ENSSSCG00000035048	0.154257
ENSSSCG00000000377	0.154229
PTBP3	0.154184
TNIK	0.154158
MFF	0.154004
ARL2	0.153949
ENSSSCG00000036483	0.153948
EIF3A	0.153897
NDUFV3	0.153766
CLDND1	0.153699
NIN	0.153687
PIK3CG	0.153546
EXOSC8	0.153539
ENSSSCG00000017928	0.153503
DAZAP2	0.153276
CPNE3	0.15326
LAT2	0.15315
PSENEN	0.152856
CCDC115	0.152794
DLGAP4	0.152617
RCN2	0.152606
MANF	0.152557
STK38	0.152387
DHX9	0.152264
RNF4	0.152263
TXK	0.152185
TAOK3	0.152151
FNBP4	0.152119
ZNF106	0.151958
ENSA	0.151941
SAFB	0.151867
HYOU1	0.151646
FUNDC1	0.151642
ENSSSCG00000012178	0.151633
TBC1D17	0.151611
STK26	0.151544
CACYBP	0.151352
TWISTNB	0.151329
MRPL52	0.151242
DDOST	0.151148
ADGRE5	0.151112
PAXX	0.151095
ENSSSCG00000016100	0.150904
SH3GLB1	0.150819
TMUB1	0.150728
CMPK2	0.150517
TIMM17B	0.150449
AURKAIP1	0.150291
AKR1A1	0.150191
MAP1LC3B	0.150092
TMEM154	0.149865
CYTIP	0.149854
CAB39	0.149633
RSAD2	0.149522
RPS19BP1	0.149382
SHISA5	0.149316
FLI1	0.149161
HDAC1	0.149153
TMEM165	0.149125
MRPL38	0.148968
PHC2	0.148948
IL4R	0.148915
LRP10	0.148895
ENSSSCG00000025060	0.148886
ERP29	0.148866
MYO5A	0.148746
C5orf15	0.148683
ENSSSCG00000015434	0.148662
APBB1IP	0.148606
GGNBP2	0.148586
RHOF	0.148575
ENSSSCG00000002841	0.148498
ZBTB38	0.148426
ENSSSCG00000009770	0.148393
EBNA1BP2	0.148042
UBE2J1	0.147992
PGK1	0.147906
GSK3B	0.147884
FIBP	0.147734
TMEM126B	0.147675
PKNOX1	0.147582
ENSSSCG00000036892	0.147563
MAT2B	0.147405
TMEM87B	0.147384
GNLY	0.147351
FBXO39	0.147216
PYGM	0.147
CNOT6L	0.146886
ENSSSCG00000031169	0.146802
KHDRBS1	0.146681
GIT2	0.146608
TSPAN14	0.146398
PHB	0.14632
PI4K2B	0.146115
SLA	0.145997
BDP1	0.145993
PTGER2	0.14563
STARD4	0.145619
SMARCA5	0.145522
HIF1A	0.145442
MRPL21	0.145437
MOB3A	0.145189
SRRM1	0.145187
ENSSSCG00000003211	0.145184
CSRP1	0.144925
PPIG	0.144924
PAFAH1B3	0.14492
RAB24	0.14491
OGA	0.14471
DTX3	0.144692
SLC9A3R1	0.144624
AP1S1	0.14445
ENSSSCG00000009788	0.144432
CPPED1	0.144248
NIPBL	0.144246
RNF7	0.144207
YIPF5	0.144077
CDK4	0.14394
EFTUD2	0.14389
RASSF5	0.143825
EMC3	0.143746
ENSSSCG00000028397	0.143686
PRDX6	0.143639
AP2S1	0.143607
ATP6AP2	0.1434
RALA	0.143133
SNRPD1	0.142909
CCS	0.142806
SQSTM1	0.142798
CDC42SE1	0.142771
BUD23	0.142743
AHI1	0.142736
SMC1A	0.142687
MRPL20	0.142658
RNF149	0.142428
LITAF	0.142322
RSL24D1	0.142275
ACAP1	0.142169
IRF1	0.142106
ENSSSCG00000004307	0.142105
GDI1	0.142099
EIF5B	0.142081
ATP2B1	0.142053
SDHB	0.142018
ENSSSCG00000010301	0.141861
RAB10	0.141807
VTI1B	0.141726
CISH	0.141669
ADD3	0.141643
PSMB3	0.141612
RSU1	0.141598
ZNF512B	0.141581
DAPL1	0.141353
COMMD6	0.141223
ENSSSCG00000027907	0.141079
PPHLN1	0.140981
HAUS1	0.14089
ITGA2B	0.140753
TMCO1	0.140751
KLF13	0.14069
MAP4K1	0.140598
SMC3	0.140523
ENSSSCG00000027746	0.140414
RAD23A	0.140395
AKAP9	0.140194
ENSSSCG00000040248	0.139951
MAP2K3	0.139833
CLOCK	0.139704
NDUFA10	0.139576
FUNDC2	0.139539
FOXN3	0.139193
DDX19B	0.13918
RAB27A	0.139133
CLINT1	0.139128
ND6	0.139073
STUB1	0.138855
POLE4	0.13885
DDX24	0.138802
ENSSSCG00000013878	0.1388
CELF1	0.138788
JMJD1C	0.138644
ENSSSCG00000015499	0.138523
RAB21	0.138428
UPRT	0.138299
IL6R	0.138274
RPL7L1	0.138269
PRR7	0.138204
G3BP2	0.138198
ACOX1	0.13818
TYMS	0.138101
PEF1	0.138028
BRD7	0.138004
STRAP	0.137845
EIF6	0.137772
CWF19L2	0.137671
USP39	0.137067
THOC2	0.136948
ENSSSCG00000026354	0.136841
PLEKHA2	0.136795
ATXN7L3B	0.136764
CREBZF	0.136763
PPP2R5A	0.136726
ENSSSCG00000029577	0.136464
TMEM147	0.136442
CLTA	0.136042
CSE1L	0.135975
FLNA	0.135904
NCBP2	0.135787
RPIA	0.135723
EML2	0.135634
ENSSSCG00000035686	0.135546
POLR2E	0.135387
RCHY1	0.135351
ENSSSCG00000016323	0.135229
FYB1	0.135164
ELAVL1	0.135068
MEA1	0.135063
LRCH3	0.13499
UBL3	0.134939
GTF2F1	0.13487
CNOT7	0.13462
NAGA	0.134616
NANS	0.134412
LEPROTL1	0.134404
ENSSSCG00000014094	0.134303
RRP15	0.134292
USP11	0.13416
BCAT1	0.133962
ENSSSCG00000037251	0.133915
ACADVL	0.133799
ENSSSCG00000008452	0.133768
PHF14	0.133666
MTA2	0.133478
CAPNS1	0.13346
TGFB1	0.13337
RETREG2	0.133241
DYNLRB1	0.13322
TMED5	0.133123
IRF2BP2	0.132971
MPHOSPH8	0.132942
MAP7D1	0.132897
SMAD2	0.132848
WTAP	0.132547
FLII	0.132444
PDK1	0.13238
CCDC82	0.132345
MAP2K6	0.132323
FAM210B	0.132242
SARS	0.132229
XBP1	0.132215
TBRG1	0.132154
NDUFB11	0.132142
DLG1	0.132067
RER1	0.132063
CALM3	0.131963
CHCHD10	0.131947
ENSSSCG00000037565	0.131759
PUM2	0.131629
DERA	0.131472
PDAP1	0.131467
MED6	0.131462
PUS3	0.131387
MGAT4A	0.131373
PDCD5	0.131341
HDAC2	0.131217
BCAP29	0.131052
ENSSSCG00000004414	0.130875
TAF7	0.130846
ENSSSCG00000016970	0.130727
ZNF148	0.130641
ZBTB20	0.130608
RAB11A	0.130591
CERS2	0.130522
CCNC	0.130414
NAPA	0.130251
COMMD3	0.130156
ENSSSCG00000036224	0.130122
KDELR2	0.130089
LMNB2	0.130005
SIVA1	0.129976
HMOX2	0.129971
NAXE	0.12996
CGAS	0.129958
RAB35	0.129952
EXOC4	0.12994
ENSSSCG00000038351	0.129912
LENG8	0.129831
COTL1	0.12977
TMED10	0.129749
M6PR	0.129748
TUBGCP2	0.129745
ZNF395	0.12969
SSR1	0.129606
EPB41	0.12938
VPS25	0.129206
ENSSSCG00000034072	0.129139
CD48	0.129125
UQCR10	0.129104
MRPS26	0.129022
NFKBIA	0.128938
PHF3	0.128928
ENSSSCG00000002449	0.128873
COPS6	0.128864
BTF3L4	0.128496
CASTOR1	0.128423
MED4	0.128351
CCNL1	0.128252
ENSSSCG00000004253	0.128195
SUPT3H	0.128169
SRSF11	0.128068
ENSSSCG00000010517	0.128064
SLC35C2	0.127976
ENSSSCG00000021738	0.127974
ENSSSCG00000027790	0.127933
UBE2G1	0.127905
METAP2	0.127788
MRPS10	0.127783
ENSSSCG00000037475	0.127747
RFC1	0.127746
GMPS	0.127727
ENSSSCG00000034868	0.127716
LARS	0.127672
PIK3R1	0.127621
IL10RA	0.127618
CPSF6	0.127388
SRP54	0.127366
TERF2IP	0.127323
DCUN1D5	0.127314
DDX3X	0.127211
ENSSSCG00000011493	0.127166
BTG2	0.127105
ENSSSCG00000010954	0.127102
RBPJ	0.1271
TCEA1	0.12709
FAM76A	0.127074
ENSSSCG00000035209	0.127063
TOB2	0.127061
SF3A3	0.127024
ENSSSCG00000002996	0.127019
WAS	0.126931
TNFSF11	0.126902
CENPH	0.126824
BIN1	0.126696
EIF4H	0.126671
ENSSSCG00000000365	0.126666
E2F4	0.126636
ABI1	0.126606
BYSL	0.126562
YY1	0.126541
ENSSSCG00000004666	0.126506
MCL1	0.126454
SRPK1	0.126395
DDX47	0.126285
ALG13	0.126265
ESF1	0.126245
CCDC25	0.12615
GOLGB1	0.126077
PRKCSH	0.126066
NARS	0.125987
SERPINB1	0.125966
ENSSSCG00000010674	0.125877
PBXIP1	0.125845
PCID2	0.125758
PARVG	0.125713
TM6SF1	0.125669
ENSSSCG00000014280	0.125589
RPN2	0.125475
STK19	0.125469
ENSSSCG00000031278	0.125326
SELENOT	0.125301
EIPR1	0.125292
UPP1	0.125269
ENSSSCG00000035224	0.125044
CLK1	0.125004
FUCA2	0.124967
CAPRIN1	0.124894
RAB11B	0.12488
CHCHD1	0.124815
VPS37B	0.124774
EDF1	0.124767
SPOCK2	0.124755
STIM1	0.124746
TFRC	0.124683
IFIH1	0.124661
ANXA7	0.124616
CCT8	0.124556
SHOC2	0.124458
CCDC174	0.124455
YPEL5	0.124369
PRDX4	0.124365
TSPAN31	0.124175
TMED9	0.12412
ERP44	0.124077
SNRNP27	0.124069
ANXA11	0.12406
NUDC	0.124009
ERGIC3	0.123954
NAXD	0.12391
CFAP36	0.123873
SLC4A7	0.123824
MOV10	0.123751
STRADA	0.123718
LPCAT2	0.12368
UBE2V2	0.123635
SUCLG2	0.123632
ENSSSCG00000038187	0.123589
ENSSSCG00000011917	0.123489
ENSSSCG00000040782	0.123448
RBM4	0.12333
NELFB	0.123317
ATP6V0B	0.123196
ACIN1	0.123133
SLC25A36	0.123088
PSMD3	0.122993
DCUN1D1	0.12295
INPP5B	0.122906
BOLA3	0.122886
SUN2	0.122811
ZFP36L1	0.122773
ATF7IP	0.122763
NDEL1	0.122737
PHIP	0.12264
MOB1A	0.122515
CZIB	0.122514
NDUFA8	0.122464
POP7	0.122304
PPM1A	0.122234
GSE1	0.122187
ZC3H15	0.122177
CARHSP1	0.122047
MBD1	0.121933
NSMCE1	0.121913
RBMS1	0.121779
RASSF3	0.121768
CRIPT	0.121739
CREB3	0.121736
ZNF282	0.121676
PSME3	0.121624
C7orf50	0.121482
BUB3	0.121454
TMC8	0.12144
PYGL	0.121439
AGO3	0.121376
ENSSSCG00000014618	0.121361
PDLIM7	0.121333
UQCRQ	0.121324
ENSSSCG00000037299	0.121321
VAMP4	0.121302
RDH14	0.121249
NXT1	0.121231
DCTN5	0.12116
EIF4E	0.121134
ENSSSCG00000040294	0.121107
INTS6	0.12104
FAM172A	0.121027
CCNB1IP1	0.120955
PCMT1	0.120821
MLF2	0.120787
TMEM18	0.120747
ENSSSCG00000035869	0.120594
ASAP1	0.120569
NME1	0.120536
ARHGDIA	0.120328
SNUPN	0.120328
TP53I11	0.120189
POLR2D	0.120102
ENSSSCG00000008057	0.120001
PABPN1	0.119951
APOBEC3B	0.119897
GYG1	0.119878
SUN1	0.119783
LAMTOR2	0.119728
ENSSSCG00000006363	0.119707
TPGS1	0.119549
PDGFA	0.119517
ST3GAL1	0.119502
ENSSSCG00000007098	0.119484
TTC9C	0.119476
USF2	0.119451
ENSSSCG00000006919	0.119408
MPV17L2	0.119342
HNRNPD	0.119321
CCL5	0.119319
ENSSSCG00000025028	0.119251
UGP2	0.119235
BID	0.119209
ABCC1	0.119203
FBXL15	0.119107
USP15	0.119065
ENSSSCG00000014387	0.119054
NUP50	0.1189
CASP8	0.118865
ENSSSCG00000034129	0.118861
RCC2	0.118852
SNRNP40	0.118834
NNT	0.118813
RRBP1	0.118768
RO60	0.118729
RAE1	0.118706
ENSSSCG00000031152	0.118696
ENSSSCG00000004583	0.118691
PRPS1	0.118666
CHIC2	0.11863
BPTF	0.118569
PPP4C	0.118431
RBM25	0.118353
ENSSSCG00000027974	0.11834
BRD9	0.118319
MRPL22	0.118308
DGUOK	0.118295
CWC15	0.118129
GHDC	0.118122
EIF2S1	0.118107
PARP9	0.118067
WAPL	0.117989
MOBKL3	0.117969
ENSSSCG00000011121	0.117966
SQLE	0.117961
ATOX1	0.117921
UCHL5	0.117846
CTSF	0.117778
UBE2K	0.117774
FAM120A	0.117754
MFGE8	0.117719
PCOLCE	0.117685
CHCHD3	0.117611
IPO7	0.117599
NMI	0.117583
UBE4A	0.117509
RNF5	0.117486
POC5	0.117399
LSM7	0.117357
ENSSSCG00000027085	0.117269
SMARCE1	0.117181
ADAM19	0.117139
SNRPA1	0.117112
RRAGB	0.117026
LYRM1	0.117018
ENSSSCG00000021380	0.116955
NBR1	0.11688
NAA10	0.116813
CNP	0.116801
TMEM248	0.116764
EMC2	0.116678
CISD2	0.116649
PRPF4B	0.116623
SYAP1	0.116619
TBC1D20	0.116599
SPTAN1	0.116554
GPD1	0.116499
2021-09-02	0.11643
VIRMA	0.116387
RAB22A	0.116347
SPG21	0.116309
NDUFS6	0.116301
TXNL1	0.116237
SDHAF1	0.11623
SEC11A	0.116202
ENSSSCG00000002296	0.116053
YIPF3	0.116038
TMEM189	0.116036
HNRNPH2	0.116035
ENSSSCG00000038963	0.116012
ENSSSCG00000006324	0.115962
H2AFY	0.11586
STIP1	0.115803
PDCD6	0.115408
DOCK11	0.115387
DOCK10	0.115373
USP8	0.115287
ATG3	0.115273
RBBP7	0.115238
NUDT21	0.115204
MDH1	0.115119
DDX27	0.115001
ENSSSCG00000010734	0.114952
ENSSSCG00000002505	0.114924
SMIM7	0.114781
RTN4	0.114681
IDH2	0.114585
NCOR1	0.114507
RFX7	0.114462
RBM38	0.114415
CDV3	0.114403
FOLR1	0.11439
GSTO1	0.114385
HSPD1	0.114369
MRPL41	0.114368
THUMPD1	0.114361
PRDX5	0.114347
ENSSSCG00000001505	0.114319
NIFK	0.114281
PSMC5	0.114242
ENSSSCG00000038444	0.114241
DYRK2	0.114223
SNRPF	0.114195
ENSSSCG00000035738	0.114084
ELMO1	0.114068
ND4L	0.114064
ENSSSCG00000000097	0.113968
ITGAE	0.113923
RAB1A	0.113822
VPS16	0.113763
UBE2D2	0.113667
NDUFS4	0.11366
PDIA3	0.113496
GNAI3	0.113384
RNF20	0.113372
SNRNP200	0.11324
DUT	0.113006
SNX2	0.112972
ENSSSCG00000007203	0.112949
PTBP1	0.112933
PRDX3	0.112931
VTI1A	0.112848
UBE2L6	0.112826
ANKRD27	0.112608
MED19	0.112608
KLHL28	0.112599
STMN3	0.112447
SGTA	0.112424
GIN1	0.1124
BRD2	0.112346
FBXW7	0.112286
EXOSC4	0.112224
OGFOD2	0.112212
TMEM97	0.112175
FLOT1	0.1121
ENSSSCG00000026719	0.112028
PIK3R5	0.111986
DYNLT1	0.111937
ARHGEF6	0.111921
C19orf66	0.111817
GPBP1	0.111749
PLXNC1	0.111741
DARS	0.111718
MLEC	0.111691
PLGRKT	0.111679
ENSSSCG00000007944	0.111646
KPNB1	0.111637
TUT4	0.111584
KAT8	0.111526
PFDN4	0.111369
VAPB	0.111331
P2RY10	0.111244
VAV1	0.111058
SNAPC4	0.111026
RNF146	0.110973
R3HDM4	0.110952
SERPINB9	0.110882
MIS12	0.110729
ASB9	0.110671
ENSSSCG00000004392	0.11055
MEF2A	0.110547
LFNG	0.110473
DIS3	0.110412
UBAP2L	0.110345
TUT7	0.110314
ZBTB7A	0.110303
DKC1	0.110209
PRF1	0.110186
INPP1	0.110156
DYRK1A	0.110057
MICU2	0.109932
CSNK1G1	0.109931
SUCLA2	0.109924
EEF1AKMT1	0.109869
RRN3	0.109858
PCNA	0.109857
STX8	0.109852
RUVBL1	0.109834
PBDC1	0.109833
ENG	0.10974
UBE2W	0.109738
CDC26	0.109596
NOL8	0.109496
ROMO1	0.10949
ZC3HAV1	0.109435
VDAC3	0.109422
CLK3	0.109371
PARVB	0.109348
VPS72	0.109333
COA3	0.109272
CBX5	0.109247
IL18R1	0.109231
PSTPIP1	0.109163
MRPL55	0.109038
ENSSSCG00000031073	0.109034
PIP4K2A	0.108956
UBA1	0.108914
GOLM1	0.10885
XRCC6	0.108831
CDC42SE2	0.108791
ENSSSCG00000030131	0.10874
EMC10	0.10865
HSPH1	0.108366
KIF2A	0.108341
LRRC8C	0.108239
SIRT2	0.108219
PXK	0.108169
LASP1	0.108157
ENSSSCG00000001927	0.108156
JOSD2	0.108054
ERGIC2	0.108013
DUSP11	0.107953
SELENOH	0.107923
DENND1C	0.107912
ENSSSCG00000016041	0.107906
FYTTD1	0.107898
PTTG1IP	0.107889
MDH2	0.107843
INPP5D	0.107829
CCNH	0.107816
ENSSSCG00000025593	0.107762
JAK3	0.107739
STOM	0.107723
FERMT3	0.107665
ACADSB	0.107617
SAR1A	0.107595
IWS1	0.107566
CORO1B	0.107545
BRWD1	0.107495
REL	0.107414
LARP4	0.107338
JADE1	0.107297
CCDC66	0.107088
DCTN2	0.10687
SNW1	0.106862
LAMP2	0.106832
CPD	0.106817
U2AF2	0.106801
C1orf43	0.106741
TRA2A	0.106721
TECR	0.106676
ZNF292	0.106609
GOLGA7	0.106514
BIRC6	0.106428
TOR4A	0.106348
POLM	0.106229
MYDGF	0.106075
RAB18	0.106045
ENSSSCG00000038403	0.105855
NAT9	0.105846
NSRP1	0.105775
MRPS18A	0.10576
ENSSSCG00000017165	0.105752
SPPL2A	0.105663
UQCRC2	0.10566
RBM5	0.105644
SNRPC	0.10562
IDH3G	0.105586
ANKRD44	0.105461
PLEKHB2	0.105458
ZNF207	0.10525
FBXO6	0.105248
TNFAIP8L2	0.105127
SMCHD1	0.105091
TAP1	0.105067
RIPK3	0.105012
GBE1	0.104972
DPY19L1	0.104965
ENSSSCG00000026488	0.104943
ENSSSCG00000039618	0.104687
SRPRB	0.104648
TM9SF3	0.104616
ENSSSCG00000016768	0.104528
ORAI3	0.104444
NCOA7	0.104418
ENSSSCG00000027491	0.104351
PPP3CA	0.104201
USP5	0.104186
SPRYD7	0.104186
VPS26A	0.104183
ENSSSCG00000004349	0.104083
RASSF2	0.104066
CCSER2	0.104048
HERC6	0.10373
MRPS12	0.103714
RMDN1	0.103698
ENSSSCG00000012046	0.103651
PLEKHA1	0.10362
LDLRAD4	0.103588
EXOSC3	0.103564
NDUFA11	0.103489
DUSP2	0.103431
FCMR	0.103425
ENSSSCG00000007749	0.103419
ZCRB1	0.103253
NDUFA9	0.10323
LAMTOR1	0.103207
CHURC1	0.103179
ACYP2	0.103177
FBXO11	0.103039
CLNS1A	0.10301
ABHD1	0.102755
TMEM71	0.102732
DR1	0.102702
HADHA	0.102638
PIM1	0.102554
ENSSSCG00000013155	0.102454
PMPCA	0.102376
ENSSSCG00000026446	0.102369
COX6A2	0.102223
MAP3K1	0.102216
ENSSSCG00000028794	0.102155
HSPA4	0.102119
DNMT1	0.102114
PSMC1	0.102104
PLXND1	0.102101
PUM1	0.102088
MRPL9	0.102063
HLF	0.101941
PSMF1	0.101904
ENSSSCG00000008383	0.101893
SNRNP25	0.10188
PMPCB	0.101857
ZMYND11	0.101827
CHD9	0.10182
UQCC3	0.101798
ENSSSCG00000025007	0.101793
MRPS24	0.101792
KPNA1	0.101633
CRIP2	0.101576
ENSSSCG00000039331	0.101571
MPC2	0.101534
TNRC6C	0.101464
COG3	0.101464
TMEM126A	0.10146
RBMX2	0.101388
RILPL2	0.101364
SART1	0.101222
GTF2B	0.101194
PFKL	0.101192
BCAT2	0.101183
UXS1	0.101166
DHRS3	0.101144
EMC7	0.101069
SMAP1	0.101023
ENSSSCG00000007609	0.100978
STAT5A	0.100961
TGIF1	0.100935
SECISBP2	0.10089
TMEM19	0.100871
BRMS1	0.10085
ENSSSCG00000038989	0.100847
ING2	0.100774
[truncated: 12,388 more rows]

## Sheet: 6v21_Permutation
Supplementary File 14. Random forest pair-wise analyses of CD2 ɣ𝛿 T-cell cluster. For each model represented below the porcine scRNA-seq cluster IDs compared are shown along with the parameters used and resulting OOB prediction error. Variable importance was assigned by measuring node impurity (Impurity) and using permutations (Permutation). Features that reduced error in predictive accuracy are …
Gene	Permutation
LGALS1	0.0185953
S100A4	0.00678357
S100A11	0.00419598
ITGB1	0.00311055
S100A6	0.00272465
S100A10	0.00152617
ID3	0.0013973
CGA	0.00135408
ANXA2	0.00123493
COX1	0.00101753
TMSB10	0.000935535
ENSSSCG00000004970	0.000874299
ENSSSCG00000037142	0.00085626
NDFIP2	0.000842835
ENSSSCG00000033721	0.000770022
C15orf48	0.000764715
RPS16	0.000728194
CAMK2N1	0.000533675
ENSSSCG00000000663	0.000526076
AQP3	0.000497805
RORA	0.000479222
ENSSSCG00000014565	0.000478082
RORC	0.000462232
ATP6	0.000453555
VIM	0.000425702
RHEX	0.000423759
COX2	0.000417847
CD74	0.00040903
PLP2	0.000407281
CD247	0.00040551
TSPO	0.000400038
LTB	0.000385105
TPT1	0.000376905
MT3	0.000369951
COX3	0.000365362
HLA.DRA	0.000346497
FAM129A	0.000331862
ID2	0.000327217
SLA.DQB1	0.000323227
BCAS4	0.000312027
DHRS7	0.00030963
RPS11	0.000291926
GZMB	0.000285875
GPX1	0.000265147
ENSSSCG00000036618	0.000250781
ENSSSCG00000006081	0.00023899
UCP2	0.00023795
RGS19	0.000226512
B2M	0.000221929
ENSSSCG00000005453	0.000206467
SAMHD1	0.000195278
EVL	0.000195015
ENSSSCG00000033734	0.000181919
ARPC3	0.000176456
CAPG	0.000175031
RPS20	0.000170374
EIF4A2	0.000164269
LSP1	0.000164245
ENSSSCG00000033909	0.00016321
CAPZA1	0.000162055
TRAT1	0.000160861
ENSSSCG00000003042	0.000159706
ZRANB2	0.000158864
CD1D	0.00015349
F2R	0.000153074
IL7R	0.000152679
TRDC	0.000146307
PLAAT3	0.000144988
RPL34	0.000144834
RACK1	0.000143401
PRKCB	0.000142998
RETNLB	0.000140236
ENSSSCG00000004145	0.000134632
RPL35	0.000126283
ENSSSCG00000022176	0.000124944
ANXA1	0.000124243
ENSSSCG00000031773	0.000123919
RPS27	0.000123392
PARK7	0.000122346
ENSSSCG00000023158	0.000121037
ATP5MC2	0.000118921
TMOD3	0.000117135
GATA3	0.000116274
CD3E	0.000116028
PLVAP	0.000115957
ETS2	0.000113839
BLK	0.000111637
FLT3LG	0.000105591
ENSSSCG00000036716	0.000104859
IFI6	0.000104791
TMA7	0.000104783
CCND3	0.000103849
ENSSSCG00000011234	0.000102267
SSR2	0.000102024
CTSD	0.000100811
ENSSSCG00000032017	9.91286e-05
ENSSSCG00000027573	9.61234e-05
ENSSSCG00000036096	9.57362e-05
ENSSSCG00000003253	9.55274e-05
CMAS	9.4884e-05
COX6C	9.36584e-05
ENSSSCG00000001229	9.25649e-05
ELK3	9.1296e-05
CCT7	9.10541e-05
PFN1	8.98746e-05
RABAC1	8.97399e-05
TNFRSF1B	8.90541e-05
SH3BGRL3	8.89374e-05
PRKACB	8.83749e-05
TIMP1	8.72454e-05
LIMD2	8.69173e-05
CAMK4	8.64009e-05
CD9	8.60381e-05
CCT3	8.6005e-05
GPR174	8.56202e-05
NDUFB9	8.50661e-05
ENSSSCG00000038507	8.30954e-05
DAAM1	8.25627e-05
MAP1S	8.08468e-05
ITM2C	8.00856e-05
KLF2	7.95468e-05
CDC123	7.91472e-05
ANXA5	7.80883e-05
RCSD1	7.74576e-05
JAML	7.74433e-05
ENSSSCG00000013596	7.7269e-05
TUBB	7.63696e-05
ENSSSCG00000001455	7.63257e-05
ENO1	7.60765e-05
PTPRC	7.56224e-05
MRPS25	7.51563e-05
ENSSSCG00000013366	7.4689e-05
COPS2	7.43762e-05
SEC11C	7.43171e-05
CD52	7.42501e-05
LRCH4	7.41367e-05
SCAF11	7.40905e-05
EIF1B	7.3265e-05
RPL9	7.20513e-05
IFITM3	7.20064e-05
LZTS1	7.18291e-05
ENSSSCG00000030300	7.1757e-05
BATF	7.16579e-05
VPS28	7.16037e-05
MBNL1	6.95022e-05
RPS23	6.92299e-05
ENSSSCG00000001456	6.91708e-05
VASP	6.87484e-05
HYPK	6.84074e-05
ISG15	6.83247e-05
FAM160B1	6.80682e-05
ENSSSCG00000017239	6.72541e-05
ENSSSCG00000034448	6.70642e-05
RPL11	6.67572e-05
COX7B	6.6224e-05
2021-09-06	6.61997e-05
HVCN1	6.61804e-05
HSP90AB1	6.54512e-05
S100A1	6.53413e-05
PSMB9	6.52854e-05
DDIT4	6.52514e-05
DYNLL1	6.51139e-05
MATK	6.48877e-05
RPS18	6.38216e-05
BTG1	6.32789e-05
EMP3	6.30026e-05
CCT5	6.23947e-05
MGST1	6.22869e-05
DNAJC8	6.21991e-05
SRGN	6.11221e-05
PSMA3	6.02559e-05
RPS5	6.00392e-05
CTSW	5.97309e-05
TMEM147	5.97262e-05
ENSSSCG00000037885	5.95161e-05
ND1	5.93883e-05
NDUFC2	5.93784e-05
ENSSSCG00000003885	5.9144e-05
ENSSSCG00000009772	5.90712e-05
TBCA	5.8902e-05
SNX10	5.88651e-05
ENSSSCG00000016679	5.87701e-05
ENSSSCG00000013597	5.87578e-05
CD81	5.8712e-05
PCBP2	5.76745e-05
ITM2B	5.74912e-05
ZMAT5	5.74421e-05
ENSSSCG00000014569	5.68785e-05
EMC3	5.65523e-05
ACTG1	5.6405e-05
ARPC1B	5.63126e-05
AURKAIP1	5.62782e-05
VPS37B	5.60809e-05
VIRMA	5.59585e-05
ENSSSCG00000035507	5.5667e-05
MYL6	5.55067e-05
ENSSSCG00000000905	5.4221e-05
ENSSSCG00000004489	5.39421e-05
CD38	5.37246e-05
HCST	5.37154e-05
OCIAD1	5.34295e-05
ENSSSCG00000039407	5.34066e-05
GCHFR	5.32298e-05
POP7	5.32e-05
TRAPPC5	5.31777e-05
MTMR6	5.31651e-05
ITGA4	5.30654e-05
RPL27	5.30117e-05
MRPL52	5.26699e-05
ENSSSCG00000033697	5.18132e-05
ENSSSCG00000028485	5.1487e-05
NAGA	5.1467e-05
HNRNPDL	5.13862e-05
ENSSSCG00000016758	5.13558e-05
CCR8	5.10285e-05
ENSSSCG00000032003	5.0879e-05
ESD	5.07431e-05
DDX39B	5.06769e-05
VTA1	5.04068e-05
EIF2S2	5.03492e-05
PLAC8	5.02999e-05
MKNK1	5.02725e-05
ENSSSCG00000037565	5.02638e-05
HSPA8	4.99121e-05
ND3	4.98623e-05
ENSSSCG00000026064	4.98261e-05
HNRNPK	4.96862e-05
PPP1CC	4.92008e-05
IAH1	4.88336e-05
GLUD1	4.85236e-05
UBE2K	4.84538e-05
GSN	4.81297e-05
SPEN	4.80852e-05
DTX3	4.79986e-05
PAK2	4.78798e-05
TNFAIP8	4.78731e-05
RPL26L1	4.78269e-05
EHD1	4.77488e-05
IL2RA	4.77015e-05
TRAF1	4.76343e-05
TUBA1B	4.76119e-05
NAT9	4.75056e-05
CNBP	4.73694e-05
ENSSSCG00000039249	4.72898e-05
ZNF277	4.71429e-05
ENSSSCG00000009327	4.71128e-05
RASSF2	4.70729e-05
PSMB10	4.70559e-05
ENSSSCG00000036296	4.70264e-05
TWISTNB	4.69948e-05
PTPN6	4.66332e-05
TPI1	4.64027e-05
ZFP36L1	4.62603e-05
CFDP1	4.61641e-05
ENSSSCG00000038187	4.58646e-05
ATP6V1G1	4.58164e-05
BUD23	4.57347e-05
RPL39	4.54318e-05
ANXA11	4.5365e-05
GGNBP2	4.53004e-05
YWHAH	4.52564e-05
MAX	4.52518e-05
ELOVL5	4.52413e-05
RDX	4.52211e-05
ENSSSCG00000006628	4.51473e-05
RNF7	4.51177e-05
SDF4	4.50024e-05
ARRB2	4.49972e-05
ENSSSCG00000010517	4.4941e-05
SSR4	4.48586e-05
HMGB2	4.48014e-05
CUTA	4.46422e-05
CIRBP	4.45702e-05
ENSSSCG00000037143	4.44412e-05
ENSSSCG00000006665	4.43516e-05
SFT2D1	4.42245e-05
ENSSSCG00000034617	4.41486e-05
ATP5PB	4.40202e-05
ZBTB20	4.39953e-05
PSME1	4.39532e-05
ENSSSCG00000035728	4.38564e-05
GABARAPL2	4.35079e-05
ENSSSCG00000016263	4.29102e-05
MIEN1	4.24219e-05
EIF4EBP1	4.23295e-05
ENSSSCG00000014850	4.21088e-05
AGA	4.20466e-05
ENSSSCG00000027074	4.19916e-05
TMEM154	4.19663e-05
FBL	4.18979e-05
JMJD1C	4.17934e-05
HSPA5	4.15334e-05
IL4R	4.1364e-05
SLAMF7	4.13349e-05
OAZ1	4.13102e-05
VAV1	4.12202e-05
RPL26	4.10506e-05
HP1BP3	4.09099e-05
REX1BD	4.0707e-05
CD86	4.03159e-05
SLC25A4	3.96374e-05
MCL1	3.95115e-05
ENSSSCG00000006061	3.93154e-05
SLC25A24	3.92395e-05
IQGAP1	3.91966e-05
DR1	3.90963e-05
OXA1L	3.89361e-05
AGTRAP	3.88557e-05
GUK1	3.87939e-05
NEDD8	3.8792e-05
ENSSSCG00000014343	3.87455e-05
TBC1D10C	3.86857e-05
TNFSF14	3.86828e-05
SF3B1	3.86547e-05
POLR2I	3.8622e-05
GTF2H3	3.84715e-05
CLK3	3.84171e-05
ENSSSCG00000014997	3.83982e-05
HINT1	3.83798e-05
ARHGEF7	3.83599e-05
HMGN3	3.83107e-05
ENSSSCG00000005768	3.8293e-05
CALM3	3.81205e-05
ATP5F1A	3.7894e-05
ENSSSCG00000011272	3.71957e-05
ISCU	3.69215e-05
ACP1	3.66743e-05
ENSSSCG00000020830	3.65939e-05
SF3A1	3.63508e-05
SUSD3	3.61769e-05
GNB1	3.61516e-05
GPD1	3.61414e-05
ND4	3.61258e-05
PNRC1	3.60926e-05
PDLIM7	3.60674e-05
COX4I1	3.59791e-05
ENSSSCG00000039460	3.5804e-05
PRRC2C	3.57884e-05
ENSSSCG00000001063	3.57697e-05
ELAVL1	3.57657e-05
ENSSSCG00000031278	3.57642e-05
SNAPC4	3.57548e-05
PGAM5	3.57446e-05
TNNI2	3.57124e-05
RPS3A	3.56869e-05
ACYP2	3.56661e-05
NOLC1	3.56626e-05
ARPC5L	3.56504e-05
BOLA3	3.56345e-05
TOB1	3.56126e-05
TIA1	3.55299e-05
FXR1	3.5482e-05
SNU13	3.54467e-05
PTBP3	3.54394e-05
RAD21	3.53999e-05
ZNF613	3.53838e-05
PVRIG	3.52667e-05
ZNF511	3.524e-05
MDFIC	3.51312e-05
ENSSSCG00000028397	3.49285e-05
MRPL17	3.48062e-05
ARF6	3.4368e-05
MICOS10	3.41289e-05
PXK	3.39925e-05
ENSSSCG00000000273	3.35537e-05
MGMT	3.35474e-05
CMTM3	3.34448e-05
ENSSSCG00000003520	3.3424e-05
MLF2	3.34157e-05
CCNI	3.3375e-05
AIG1	3.33667e-05
PLXNC1	3.3278e-05
ADSL	3.32078e-05
ENSSSCG00000031897	3.31297e-05
ENSSSCG00000002449	3.30872e-05
MIER1	3.30803e-05
HIGD2A	3.3003e-05
GIPC1	3.29877e-05
CCL5	3.29736e-05
FKBP3	3.29104e-05
GYPC	3.2908e-05
ENSSSCG00000027085	3.28753e-05
SRSF4	3.28352e-05
ENSSSCG00000002296	3.28332e-05
ENSSSCG00000037595	3.282e-05
UBAP2L	3.27561e-05
UQCC2	3.26512e-05
DUSP1	3.26447e-05
RBMX2	3.26402e-05
ENSSSCG00000000365	3.25594e-05
RPL17.C18orf32	3.25586e-05
CFL1	3.25252e-05
MEX3C	3.24931e-05
PDK1	3.24893e-05
RCN2	3.24881e-05
HIKESHI	3.2477e-05
ABCC1	3.24697e-05
FYB1	3.24696e-05
SUN2	3.24659e-05
DGUOK	3.24645e-05
TM2D1	3.24439e-05
PUM2	3.23926e-05
ENSSSCG00000012166	3.23897e-05
NIPBL	3.23382e-05
TMEM248	3.2211e-05
MPG	3.21167e-05
ENSSSCG00000036988	3.21069e-05
ELF1	3.19333e-05
ENSSSCG00000000071	3.17627e-05
RPS13	3.17134e-05
SLC25A6	3.14322e-05
RPL5	3.12598e-05
SMDT1	3.12293e-05
OSTF1	3.11731e-05
HBB	3.06502e-05
SLC11A2	3.06214e-05
ENSSSCG00000016711	3.0593e-05
S1PR1	3.0559e-05
SCAND1	3.05125e-05
THAP7	3.03899e-05
NAF1	3.03724e-05
KAT8	3.03598e-05
SLA2	3.03587e-05
DDT	3.03243e-05
DCUN1D1	3.03004e-05
DNAJA1	3.02845e-05
TMCO1	3.02353e-05
UBQLN1	3.01656e-05
COPA	3.01507e-05
TSC22D3	3.01451e-05
ENSSSCG00000016970	3.01238e-05
PDCD10	3.01193e-05
ENSSSCG00000040857	3.01019e-05
RBM4	3.00806e-05
AHSA1	3.00636e-05
GLCE	3.00165e-05
PPP4R3B	2.99708e-05
ATP5F1D	2.99637e-05
ENSSSCG00000037602	2.99235e-05
TP53I11	2.99233e-05
ENSSSCG00000015305	2.99054e-05
ENSSSCG00000040118	2.98745e-05
EXOSC1	2.98687e-05
ENSSSCG00000003211	2.98661e-05
RPL23	2.98658e-05
LY96	2.98506e-05
MRPL43	2.98477e-05
ENSSSCG00000008236	2.98087e-05
MRPS15	2.97795e-05
KHDRBS1	2.97601e-05
SLA.DMA	2.97503e-05
TMEM50B	2.97459e-05
RSRP1	2.97191e-05
TPST1	2.97035e-05
NDUFB10	2.96394e-05
FUOM	2.96035e-05
CXCR4	2.95916e-05
TNKS2	2.95514e-05
ATM	2.95277e-05
ETS1	2.95035e-05
PAXX	2.9461e-05
SQLE	2.93569e-05
NLRC5	2.9242e-05
CPNE1	2.92351e-05
PSMB7	2.92059e-05
ENSSSCG00000023331	2.9139e-05
ENSSSCG00000039544	2.9053e-05
ENSSSCG00000004945	2.90526e-05
MFNG	2.90396e-05
TYMS	2.89896e-05
2021-09-07	2.89332e-05
ENSSSCG00000001075	2.77374e-05
NDUFA8	2.7551e-05
PTPN22	2.75289e-05
PYGM	2.75285e-05
PLEKHB2	2.74828e-05
MIF	2.74289e-05
OTUD5	2.73418e-05
ENSSSCG00000002505	2.73127e-05
CYP51A1	2.72443e-05
SEMA4A	2.72422e-05
IQGAP2	2.72278e-05
C12orf10	2.71922e-05
RASSF5	2.71874e-05
RBPJ	2.71858e-05
LAMTOR5	2.71637e-05
RAB28	2.71207e-05
CAMTA2	2.71156e-05
ERG28	2.71073e-05
ATG4C	2.706e-05
CPPED1	2.70513e-05
MGAT5	2.70498e-05
CRYBG1	2.70226e-05
MEA1	2.69793e-05
RBX1	2.69701e-05
RHOA	2.69311e-05
GNL3	2.69147e-05
APP	2.68913e-05
ENSSSCG00000036595	2.68906e-05
LAX1	2.6869e-05
ENSSSCG00000001407	2.68565e-05
CUEDC2	2.68505e-05
FAM126A	2.68437e-05
SUGT1	2.68417e-05
SLC25A36	2.68063e-05
PHC2	2.67768e-05
HYOU1	2.67643e-05
MRPL49	2.67325e-05
ENSSSCG00000032942	2.67227e-05
C19orf66	2.67219e-05
CASP6	2.67142e-05
AGO3	2.67109e-05
DONSON	2.67074e-05
UBE4A	2.67047e-05
C12orf73	2.66995e-05
RALBP1	2.66771e-05
UBE2A	2.66638e-05
POLR2C	2.66634e-05
ENSSSCG00000002898	2.66496e-05
UQCRQ	2.66458e-05
RPN2	2.66399e-05
ATP5PO	2.6627e-05
CRYL1	2.66251e-05
EML2	2.65904e-05
PGK1	2.65837e-05
RANBP6	2.65734e-05
RILPL2	2.65717e-05
CD63	2.65459e-05
CCT2	2.65416e-05
PSAP	2.6532e-05
ATP6V0C	2.65266e-05
PSMC2	2.65075e-05
ACADVL	2.64625e-05
CDKAL1	2.64591e-05
RNASEH2C	2.64152e-05
RAP1B	2.63861e-05
TALDO1	2.63652e-05
DPY19L1	2.63436e-05
MMADHC	2.63436e-05
GPATCH11	2.63096e-05
DCP2	2.62814e-05
MYO5A	2.6265e-05
ERH	2.62419e-05
HNRNPM	2.62072e-05
CST7	2.62022e-05
TAGAP	2.61471e-05
STXBP2	2.61009e-05
MISP3	2.60812e-05
MAPK1IP1L	2.59702e-05
ENSSSCG00000035520	2.59322e-05
ITSN2	2.59132e-05
GIGYF1	2.58709e-05
NPM1	2.5691e-05
PPHLN1	2.51307e-05
APOBEC3B	2.49301e-05
GNG2	2.49251e-05
POLR1D	2.45033e-05
TRA2B	2.44496e-05
ENSSSCG00000017213	2.44386e-05
RALGAPA1	2.44262e-05
ADSS	2.44193e-05
TMEM123	2.43715e-05
ENSSSCG00000013992	2.43517e-05
ARID4A	2.43432e-05
ENSSSCG00000022906	2.43378e-05
LPCAT2	2.43211e-05
WDR43	2.42004e-05
ENSSSCG00000010056	2.41963e-05
RNF13	2.41945e-05
CDC42SE1	2.41931e-05
ZNF683	2.41886e-05
CSNK1A1	2.41831e-05
ZFP62	2.41676e-05
HPS3	2.41351e-05
LENG8	2.41306e-05
TTC17	2.4123e-05
CALM1	2.41079e-05
MOCS3	2.4106e-05
COMMD6	2.40961e-05
TRIM11	2.40688e-05
POLM	2.40569e-05
NAA20	2.40535e-05
ST3GAL1	2.40532e-05
GCFC2	2.4047e-05
SNX3	2.40449e-05
AHNAK	2.40422e-05
ENSSSCG00000039731	2.40047e-05
GNB2	2.40035e-05
NR3C1	2.40031e-05
2021-03-06	2.39809e-05
PAFAH1B1	2.39804e-05
CCSER2	2.39773e-05
VAMP4	2.39752e-05
FGD3	2.39556e-05
MRPL19	2.39505e-05
GPR171	2.39431e-05
ENSSSCG00000020777	2.39395e-05
STMN3	2.39329e-05
SLC9A9	2.39193e-05
SRI	2.39178e-05
NDUFB2	2.38945e-05
SUSD6	2.38877e-05
NDUFB8	2.38729e-05
FCER1A	2.38633e-05
WDR82	2.38594e-05
TCF7	2.38581e-05
DOCK8	2.38443e-05
RNF115	2.38385e-05
BTBD1	2.38369e-05
UFM1	2.38186e-05
TLE5	2.38086e-05
ENSSSCG00000040248	2.38061e-05
ABR	2.37743e-05
BCAP31	2.37713e-05
STYX	2.37582e-05
ENSSSCG00000007203	2.37471e-05
SMARCE1	2.37443e-05
ENSSSCG00000010301	2.37428e-05
NNT	2.37397e-05
ENSSSCG00000015664	2.37257e-05
PSMD7	2.36603e-05
COX5A	2.36565e-05
EIF3F	2.36527e-05
TGFB1	2.36368e-05
RRP9	2.36241e-05
DLG1	2.36053e-05
MED4	2.3598e-05
ZYX	2.35956e-05
TBC1D17	2.35937e-05
HSD17B8	2.35871e-05
PKN2	2.35838e-05
ENSSSCG00000007749	2.35634e-05
DDX17	2.35174e-05
SLC9A3R1	2.35122e-05
TESK2	2.35069e-05
PACSIN2	2.34975e-05
EXOC2	2.34892e-05
CCDC71	2.34849e-05
ENSSSCG00000010203	2.34583e-05
CRLF3	2.34356e-05
CCDC115	2.34338e-05
METTL6	2.3431e-05
ZFP36L2	2.34189e-05
ENSSSCG00000031705	2.33923e-05
ENSSSCG00000037251	2.3385e-05
ZNRD1	2.33818e-05
RAB1B	2.33764e-05
SNRNP27	2.33467e-05
ELP5	2.33281e-05
RCHY1	2.32641e-05
COMMD3	2.32262e-05
ENSSSCG00000013721	2.31158e-05
ENSSSCG00000012916	2.3045e-05
RAB24	2.26612e-05
ENSSSCG00000007688	2.23867e-05
TGIF2.RAB5IF	2.20287e-05
BIN1	2.17446e-05
CIAO2A	2.15981e-05
PDCD4	2.15782e-05
BIN2	2.15349e-05
ENSSSCG00000023126	2.13806e-05
RBL1	2.13232e-05
IRF3	2.12928e-05
VPS16	2.12491e-05
HDAC2	2.12454e-05
BRMS1	2.12302e-05
PMPCA	2.12009e-05
RRP15	2.11915e-05
SPTBN1	2.11881e-05
ASB9	2.11796e-05
RNF19B	2.11656e-05
RNF141	2.11555e-05
ATP5F1C	2.11332e-05
STUB1	2.11152e-05
MAP2K2	2.11039e-05
PHF14	2.1101e-05
DUSP2	2.1097e-05
PPIL1	2.10834e-05
RDH14	2.10769e-05
RNF19A	2.10626e-05
PRMT3	2.1056e-05
IRF5	2.10531e-05
ADD3	2.10223e-05
ANAPC13	2.10102e-05
SLC26A2	2.10097e-05
ECHDC1	2.09945e-05
U2AF2	2.09932e-05
BIRC6	2.09904e-05
XPA	2.09827e-05
ENSSSCG00000027778	2.09768e-05
SHISA5	2.09713e-05
TRDMT1	2.09674e-05
ACADSB	2.09641e-05
MRPL35	2.09556e-05
COA6	2.09501e-05
OGA	2.09487e-05
PNRC2	2.09399e-05
PHF3	2.09396e-05
SRP54	2.09386e-05
ZC3H15	2.09289e-05
ENSSSCG00000014361	2.09281e-05
IFI35	2.09244e-05
GSPT1	2.09229e-05
ENSSSCG00000013052	2.0914e-05
PHKG2	2.09098e-05
CHMP2B	2.08969e-05
DENND4B	2.08914e-05
SNX12	2.08901e-05
DCUN1D5	2.08891e-05
ENSSSCG00000033037	2.08861e-05
ENSSSCG00000003930	2.08764e-05
KDM5A	2.08634e-05
RUSC1	2.08528e-05
ZBTB25	2.08441e-05
FAM210B	2.08432e-05
CTNNB1	2.08144e-05
TRMU	2.08107e-05
PAPSS1	2.08092e-05
KRR1	2.07926e-05
CCNL1	2.07829e-05
RAD23A	2.07819e-05
PSMD2	2.07809e-05
THOC7	2.07802e-05
GCC2	2.07747e-05
SPAG8	2.07624e-05
OARD1	2.07431e-05
ATP6V1D	2.07403e-05
FAM120B	2.07333e-05
GIT2	2.07248e-05
PPP1R13B	2.07168e-05
PLEKHO1	2.07088e-05
PRPF4B	2.07041e-05
SMPD1	2.0704e-05
PRPS1	2.06984e-05
UBL7	2.06889e-05
ARFIP1	2.06528e-05
SMC1A	2.06521e-05
TMEM106B	2.06482e-05
BCL10	2.06365e-05
FBXO22	2.06317e-05
ZNF146	2.06309e-05
ENSSSCG00000015337	2.0619e-05
RFX7	2.05862e-05
ENSSSCG00000023160	2.05819e-05
PPM1J	2.0577e-05
GMFG	2.05721e-05
PSENEN	2.05582e-05
ENSSSCG00000039071	2.05481e-05
KIF2A	2.05383e-05
CTSA	2.05307e-05
ENSSSCG00000002743	2.0501e-05
CHURC1	2.04728e-05
EXOC8	2.04675e-05
ARMC10	2.04618e-05
LRCH3	2.04618e-05
DPY30	2.04488e-05
ENSSSCG00000011237	2.04297e-05
HLF	2.04144e-05
PIK3CG	2.03969e-05
TWF2	2.0384e-05
G3BP2	2.03802e-05
ATRX	2.03797e-05
NUDT1	2.03439e-05
R3HDM4	2.03436e-05
UBE2G1	2.02743e-05
PCF11	2.01932e-05
ADGRG5	2.01838e-05
FAM43A	2.01784e-05
CNOT7	2.01519e-05
MAPRE2	2.00015e-05
CANX	1.99337e-05
RHOH	1.98621e-05
ACBD6	1.94165e-05
ORMDL3	1.878e-05
CAPZB	1.87561e-05
MTCH1	1.8611e-05
ENSSSCG00000001341	1.86091e-05
RPL7	1.85832e-05
GPSM3	1.85116e-05
ENSSSCG00000037071	1.85034e-05
LYPLA2	1.83883e-05
MSL3	1.83466e-05
GALK1	1.83212e-05
CDKN2AIPNL	1.83091e-05
MCM7	1.83034e-05
PSMC3	1.83033e-05
ENSSSCG00000014371	1.83024e-05
UNC45A	1.82905e-05
MRTO4	1.82629e-05
OVCA2	1.82525e-05
RBM38	1.82251e-05
TCEA1	1.82235e-05
C14orf119	1.82135e-05
HELQ	1.82109e-05
MFAP1	1.8201e-05
RBM25	1.81828e-05
C19orf53	1.81766e-05
LSM1	1.81685e-05
DAPK3	1.81516e-05
SRSF2	1.81498e-05
ENSSSCG00000037775	1.81445e-05
ADAM19	1.81404e-05
SLIRP	1.81389e-05
ENSSSCG00000032984	1.81384e-05
ENSSSCG00000007098	1.81345e-05
ARHGAP25	1.81309e-05
ENSSSCG00000025525	1.81232e-05
SSRP1	1.80967e-05
M6PR	1.80956e-05
RHOC	1.80924e-05
NFIC	1.80608e-05
TRIM56	1.80534e-05
NARF	1.80479e-05
MAP4K2	1.80411e-05
PCMT1	1.80387e-05
MRPL20	1.80309e-05
ULK2	1.803e-05
ENSSSCG00000021427	1.80233e-05
TNRC6B	1.80221e-05
SEC61A1	1.80051e-05
CTR9	1.80004e-05
FMNL1	1.79945e-05
RANBP3	1.79932e-05
NOTCH2	1.79912e-05
RBM23	1.79899e-05
EIF2B2	1.79864e-05
NECAP2	1.79852e-05
PHF11	1.7966e-05
EAPP	1.79604e-05
ENSSSCG00000016441	1.79523e-05
CTSF	1.79469e-05
CCT4	1.79401e-05
VAPA	1.79395e-05
FKBP5	1.79246e-05
RNF146	1.79239e-05
TRNT1	1.79236e-05
ENSSSCG00000008677	1.7921e-05
LANCL2	1.7914e-05
RNF138	1.79047e-05
FSD1L	1.78953e-05
ENSSSCG00000040056	1.7893e-05
NFRKB	1.78814e-05
CPOX	1.78774e-05
ENSSSCG00000016828	1.78771e-05
UBXN1	1.78759e-05
MTMR4	1.78732e-05
MNDA	1.78604e-05
ENSSSCG00000020686	1.78499e-05
HERC6	1.78413e-05
NDUFAF2	1.78397e-05
ACBD3	1.78264e-05
MED7	1.78217e-05
ATP13A2	1.78183e-05
CAAP1	1.78183e-05
MRPS33	1.78151e-05
LNPEP	1.78138e-05
REEP5	1.78108e-05
CARD19	1.78091e-05
ENSSSCG00000008496	1.78084e-05
ENSSSCG00000008137	1.77988e-05
PGM1	1.77984e-05
ENSSSCG00000030801	1.77892e-05
ENSSSCG00000011952	1.77878e-05
MORF4L1	1.77859e-05
FOXS1	1.77803e-05
MRPL24	1.77537e-05
GHDC	1.77531e-05
TUBB2B	1.77484e-05
ENSSSCG00000034896	1.77464e-05
TFPT	1.77437e-05
AKAP8L	1.77355e-05
SLA	1.77169e-05
HK3	1.77103e-05
SEC62	1.77091e-05
ATP6V0B	1.77085e-05
ENSSSCG00000017949	1.77059e-05
FAM104A	1.77002e-05
C2orf68	1.76978e-05
RAB11B	1.76935e-05
MTSS1	1.76622e-05
COQ5	1.76607e-05
EYA3	1.7655e-05
SRPK1	1.76499e-05
B3GAT3	1.76329e-05
UBE2B	1.76251e-05
TRMT10C	1.76188e-05
UCHL3	1.76176e-05
CLTB	1.76158e-05
ALG2	1.76155e-05
SDHC	1.76082e-05
YAF2	1.76043e-05
MAP2K7	1.76022e-05
MCC	1.76014e-05
HDGFL3	1.75902e-05
TRA2A	1.75716e-05
KAT6A	1.75714e-05
TMEM126B	1.75545e-05
DDX3Y	1.75376e-05
ENSSSCG00000030295	1.7536e-05
NFKBIZ	1.75288e-05
ABHD16A	1.75185e-05
FANCF	1.75182e-05
KIAA2026	1.75038e-05
EEF2	1.74335e-05
NAA60	1.74199e-05
ENSSSCG00000034314	1.74093e-05
ENSSSCG00000013064	1.73925e-05
LFNG	1.73834e-05
GPN3	1.73718e-05
MBIP	1.73474e-05
DVL2	1.7341e-05
CTDSP1	1.734e-05
PTPRCAP	1.73381e-05
CAPNS1	1.73058e-05
FBXO9	1.72695e-05
RSAD2	1.71908e-05
LMO4	1.71687e-05
UQCC3	1.70313e-05
PPP1R18	1.5822e-05
ENSSSCG00000033019	1.57881e-05
IL9R	1.55016e-05
PPP2R1A	1.54765e-05
ENSSSCG00000010734	1.54744e-05
WASHC3	1.5389e-05
ASH1L	1.5369e-05
ENSSSCG00000038469	1.53563e-05
LSM7	1.53318e-05
C9orf78	1.53302e-05
IFT57	1.5314e-05
NDUFS6	1.53068e-05
RRBP1	1.53053e-05
FAF1	1.52629e-05
ENSSSCG00000011329	1.52562e-05
SLC10A3	1.52526e-05
CDK2AP2	1.52525e-05
PDIA6	1.52458e-05
TMEM128	1.52378e-05
AKR1A1	1.52218e-05
PFKL	1.52088e-05
PTDSS1	1.52026e-05
C2orf15	1.51879e-05
TMEM129	1.5179e-05
FLNA	1.51683e-05
TRAPPC2L	1.51617e-05
C1orf74	1.51376e-05
CFLAR	1.51373e-05
PPP6R3	1.51339e-05
HSPA4	1.51156e-05
RNF123	1.51121e-05
ENSSSCG00000015710	1.51085e-05
ENSSSCG00000013453	1.5107e-05
DNAJA2	1.50992e-05
GATD1	1.50992e-05
PDXP	1.50887e-05
ENSSSCG00000033006	1.50831e-05
TCEANC	1.50615e-05
CDCA7L	1.50564e-05
UBE4B	1.50532e-05
WDR45	1.50519e-05
ENSSSCG00000028117	1.50506e-05
TSPAN31	1.50482e-05
PLEKHF2	1.50467e-05
LPIN1	1.50432e-05
TMEM68	1.50431e-05
TAF9B	1.50425e-05
ENSSSCG00000000148	1.503e-05
ENSSSCG00000000473	1.50248e-05
ANKRD39	1.50227e-05
TIMM29	1.50199e-05
PMPCB	1.50135e-05
NKAP	1.50135e-05
PITHD1	1.50115e-05
G3BP1	1.50101e-05
ENSSSCG00000006418	1.50092e-05
MAZ	1.49943e-05
MOB3A	1.49942e-05
SPSB2	1.49853e-05
PKNOX1	1.49847e-05
BAX	1.49836e-05
TRAM1	1.49811e-05
PDE7A	1.49794e-05
RENBP	1.49762e-05
XRCC1	1.49744e-05
OGFR	1.49706e-05
PRKD3	1.4968e-05
RBCK1	1.49664e-05
ENSSSCG00000012654	1.49644e-05
HSPB1	1.49602e-05
NT5C	1.4951e-05
TXNRD1	1.49501e-05
ENSSSCG00000027556	1.49488e-05
FLOT2	1.49465e-05
ULK3	1.49413e-05
AP5Z1	1.49322e-05
C5orf30	1.49305e-05
PPP2CA	1.49262e-05
CYTIP	1.49255e-05
FECH	1.49254e-05
PQLC3	1.49178e-05
MYO9A	1.49126e-05
DDA1	1.4911e-05
NPAT	1.49107e-05
RHBDD1	1.49096e-05
ENSSSCG00000008183	1.4909e-05
SNAPC2	1.49084e-05
LIN9	1.49001e-05
MARK3	1.48988e-05
PHGDH	1.48906e-05
EFCAB14	1.48898e-05
NDUFS4	1.4881e-05
ELK4	1.4881e-05
ENSSSCG00000040528	1.48805e-05
TMEM131L	1.48737e-05
CD96	1.48734e-05
FHOD1	1.48733e-05
ENSSSCG00000024696	1.48727e-05
PIGG	1.48667e-05
ZNF614	1.48652e-05
TFAM	1.48593e-05
PEX13	1.48571e-05
COPZ1	1.48551e-05
LMBR1	1.48522e-05
MRPL3	1.48521e-05
THAP1	1.48454e-05
SGK1	1.48388e-05
TFG	1.48383e-05
PSMA6	1.48363e-05
INKA1	1.48343e-05
TMEM43	1.48333e-05
FBXO31	1.48326e-05
ENSSSCG00000004415	1.48207e-05
CCT8	1.48203e-05
TCOF1	1.48133e-05
PABPC4	1.48114e-05
ENSSSCG00000015814	1.48101e-05
URI1	1.48096e-05
ENSSSCG00000008990	1.48053e-05
ENSSSCG00000001779	1.48041e-05
NFX1	1.48026e-05
RIOX2	1.48012e-05
SUMF1	1.4801e-05
CEP295	1.47997e-05
NDUFA9	1.47985e-05
NTAN1	1.47871e-05
CSRP1	1.47828e-05
ZBTB33	1.47817e-05
PIAS4	1.47718e-05
RASGEF1B	1.47582e-05
FAM76B	1.47482e-05
ENSSSCG00000001927	1.47403e-05
FEZ2	1.47358e-05
RETREG2	1.47347e-05
LIX1L	1.47256e-05
MCOLN2	1.47253e-05
MFSD5	1.47252e-05
ENSSSCG00000015011	1.47242e-05
CCDC137	1.47193e-05
TMEM214	1.47191e-05
TIGAR	1.47189e-05
ENSSSCG00000021322	1.47179e-05
FIGNL1	1.47148e-05
ACLY	1.47139e-05
ENSSSCG00000013836	1.47111e-05
DIMT1	1.47102e-05
2021-09-02	1.47095e-05
NIN	1.4709e-05
ENSSSCG00000031269	1.47021e-05
ENSSSCG00000027840	1.46904e-05
TMEM206	1.46874e-05
APOO	1.46833e-05
TRPV2	1.4679e-05
COX17	1.46732e-05
NCAPD3	1.4673e-05
PIGC	1.46664e-05
BIRC5	1.46501e-05
PAF1	1.46485e-05
ENSSSCG00000039706	1.46459e-05
AK6	1.46426e-05
CWF19L2	1.464e-05
TSPAN13	1.46312e-05
FAM162A	1.46286e-05
ENSSSCG00000035557	1.46259e-05
MGAT1	1.46249e-05
ATP6V1E1	1.45924e-05
PLGRKT	1.45906e-05
PLK3	1.45904e-05
GIMAP8	1.45896e-05
ENSSSCG00000021591	1.45846e-05
RPAIN	1.45823e-05
SNW1	1.45798e-05
MED21	1.45776e-05
USP15	1.45664e-05
PLIN2	1.45625e-05
ENSSSCG00000009770	1.4556e-05
UMAD1	1.45462e-05
ENSSSCG00000005841	1.45455e-05
AGFG1	1.45434e-05
ENSSSCG00000004547	1.45205e-05
CMBL	1.45195e-05
MAP2K1	1.45192e-05
MED15	1.45105e-05
ICOS	1.45015e-05
ENSSSCG00000040801	1.44882e-05
TXNDC17	1.44698e-05
ENSSSCG00000029857	1.44588e-05
ENSSSCG00000039635	1.44437e-05
DDX3X	1.44435e-05
POLR2D	1.44235e-05
PAFAH1B3	1.44076e-05
DLGAP4	1.44032e-05
MEMO1	1.43973e-05
MED31	1.43959e-05
STARD4	1.43924e-05
VAMP8	1.43809e-05
CDC42SE2	1.43637e-05
RAB10	1.43536e-05
COX7A2L	1.43282e-05
KLF13	1.43162e-05
EXOSC8	1.42869e-05
HSD11B1L	1.42528e-05
RPS9	1.42509e-05
ENSSSCG00000012811	1.42237e-05
ENSSSCG00000033068	1.42228e-05
RIOK3	1.41392e-05
ENSSSCG00000021560	1.40606e-05
CIR1	1.39894e-05
NME2	1.39181e-05
PRMT1	1.39117e-05
ATXN7L1	1.38817e-05
CSDE1	1.38574e-05
SYNCRIP	1.32084e-05
PBDC1	1.29055e-05
FERMT3	1.27425e-05
DUT	1.26724e-05
DDX46	1.26682e-05
SEC31A	1.26464e-05
RNH1	1.26215e-05
EXOSC7	1.25604e-05
UBALD2	1.25387e-05
PRPF40A	1.2532e-05
EVI2B	1.24491e-05
XPO1	1.24476e-05
ORAI3	1.24265e-05
POC5	1.23825e-05
ENSSSCG00000005201	1.236e-05
TMEM173	1.23463e-05
DAP3	1.2329e-05
RPL10A	1.23253e-05
PDGFA	1.23231e-05
SWAP70	1.22802e-05
CSE1L	1.2279e-05
OGN	1.22761e-05
IDH3G	1.22512e-05
ENSSSCG00000026719	1.22461e-05
TXNL4B	1.22293e-05
ENSSSCG00000039618	1.2225e-05
MRPL55	1.22199e-05
ARPC5	1.22182e-05
PGPEP1	1.22172e-05
SKP1	1.22074e-05
LSM6	1.21858e-05
CCNB1	1.21818e-05
IPO9	1.21812e-05
DAPK2	1.21662e-05
ATG5	1.21662e-05
SND1	1.2164e-05
PTPN4	1.21524e-05
ZRANB1	1.21508e-05
PIGL	1.21488e-05
NFATC2IP	1.21397e-05
CCPG1	1.21332e-05
RMND1	1.21273e-05
MTFMT	1.21267e-05
HSPD1	1.21245e-05
CPSF3	1.21205e-05
ENSSSCG00000028670	1.21179e-05
CHCHD10	1.21138e-05
ENSSSCG00000003664	1.21116e-05
ENSSSCG00000016212	1.21029e-05
HIST1H1D	1.21025e-05
RBM41	1.20944e-05
C16orf91	1.2093e-05
ICE2	1.20875e-05
NDUFB6	1.20828e-05
ESCO1	1.20772e-05
BCL2A1	1.20756e-05
PSMD1	1.2073e-05
ENSSSCG00000037655	1.20666e-05
KPNA2	1.20664e-05
ARHGDIA	1.20663e-05
DSTN	1.20604e-05
VAMP5	1.206e-05
UBE2D1	1.20536e-05
ACSS1	1.20509e-05
ENSSSCG00000031083	1.20493e-05
SETX	1.20459e-05
SSX2IP	1.2044e-05
ENSSSCG00000028458	1.20422e-05
POLI	1.20392e-05
ACTN1	1.20341e-05
ARL8A	1.20328e-05
FNBP1	1.20313e-05
IKZF5	1.20311e-05
SNRPE	1.20287e-05
WDR48	1.20262e-05
ENSSSCG00000010525	1.2026e-05
NCOA5	1.20222e-05
ENSSSCG00000026389	1.20221e-05
AASDHPPT	1.20205e-05
TYK2	1.20188e-05
YPEL3	1.20186e-05
HIPK1	1.20178e-05
UGP2	1.20178e-05
PATZ1	1.20137e-05
EIF1AX	1.20133e-05
ABHD3	1.20129e-05
SDF2	1.20122e-05
C14orf28	1.20097e-05
HYI	1.2009e-05
RBM5	1.20071e-05
ENSSSCG00000034866	1.20013e-05
ENSSSCG00000007705	1.20003e-05
ASH2L	1.19957e-05
RSBN1	1.19951e-05
ENSSSCG00000036892	1.19912e-05
TMEM184C	1.19906e-05
GAK	1.19899e-05
KCTD20	1.19899e-05
SLC7A5	1.19833e-05
CD79A	1.19831e-05
IFI30	1.19814e-05
TM9SF2	1.19791e-05
ME3	1.19767e-05
ROMO1	1.19762e-05
MFN1	1.1976e-05
WDFY1	1.19695e-05
NCL	1.19692e-05
ACSF2	1.19646e-05
DNAJC2	1.1964e-05
MECP2	1.19627e-05
NRAS	1.1962e-05
DHCR24	1.19582e-05
ADD1	1.19574e-05
CCDC18	1.19567e-05
PLBD2	1.19543e-05
ENSSSCG00000016451	1.19541e-05
ENSSSCG00000008070	1.19522e-05
TTC3	1.19517e-05
NT5C3B	1.19508e-05
WBP1	1.19494e-05
RNF113A	1.1946e-05
UNC5B	1.19455e-05
PREP	1.19382e-05
COX6A2	1.19379e-05
NUP188	1.19309e-05
ENSSSCG00000038963	1.19305e-05
RFC2	1.19236e-05
IL10RB	1.19226e-05
ENSSSCG00000018029	1.19208e-05
PPP2R3C	1.19173e-05
NKTR	1.19137e-05
SNCA	1.19084e-05
LIMK2	1.19077e-05
ZNF319	1.1906e-05
THEMIS2	1.1906e-05
ARID5A	1.19058e-05
TLE3	1.19052e-05
ENSSSCG00000025253	1.19049e-05
IKZF2	1.19041e-05
USP46	1.19037e-05
MLLT6	1.1892e-05
LITAF	1.18909e-05
PIGT	1.18888e-05
AREL1	1.18873e-05
GCN1	1.18845e-05
TEX10	1.18845e-05
RYBP	1.18838e-05
ENSSSCG00000011068	1.18824e-05
PNKD	1.1879e-05
ANKMY2	1.18769e-05
STRBP	1.18745e-05
HAT1	1.18739e-05
VPS26B	1.18732e-05
ENSSSCG00000016226	1.18709e-05
ENSSSCG00000000639	1.18699e-05
TAP1	1.18695e-05
CEP83	1.18694e-05
TRPC3	1.18679e-05
PSPC1	1.18673e-05
ARHGAP12	1.18663e-05
GEN1	1.18657e-05
EXO5	1.18654e-05
ALDH7A1	1.18617e-05
MREG	1.186e-05
MTPN	1.18578e-05
CLEC16A	1.18575e-05
TASOR	1.18563e-05
ATP6V1F	1.18529e-05
SLC25A39	1.18499e-05
DNAJC9	1.18497e-05
SDE2	1.18479e-05
ENSSSCG00000005658	1.18451e-05
ADAM10	1.18369e-05
BZW1	1.18349e-05
RABEP1	1.18343e-05
SLC35B1	1.18322e-05
PLEKHA1	1.18288e-05
MAPKAPK3	1.18261e-05
GID8	1.1826e-05
PGM2	1.18256e-05
TSTD1	1.18188e-05
CASS4	1.18168e-05
TBL2	1.18122e-05
SRP72	1.1811e-05
ENSSSCG00000012731	1.18102e-05
YME1L1	1.18088e-05
DNASE1L1	1.18054e-05
GTPBP8	1.18021e-05
ALMS1	1.18002e-05
KLF10	1.18001e-05
C6orf89	1.17996e-05
ENSSSCG00000017108	1.17994e-05
AMN1	1.17953e-05
LSM12	1.17946e-05
POLR2K	1.17944e-05
YKT6	1.17929e-05
TMEM14A	1.17899e-05
GNE	1.17868e-05
RETREG1	1.1786e-05
ZNF45	1.17833e-05
PTPA	1.17824e-05
DBT	1.1782e-05
ALG14	1.1782e-05
CCDC69	1.17779e-05
GADD45A	1.17736e-05
STT3A	1.17718e-05
AP1B1	1.17689e-05
ERCC5	1.17654e-05
SELENOT	1.17634e-05
ZFP36	1.17606e-05
SFT2D2	1.17584e-05
RPP25L	1.17564e-05
SMC3	1.17564e-05
RECQL5	1.17564e-05
ENSSSCG00000011917	1.1751e-05
TMEM205	1.17478e-05
ZNF18	1.17475e-05
NRROS	1.17474e-05
CCDC50	1.17435e-05
AKAP7	1.17396e-05
INTS8	1.17348e-05
TMEM60	1.17329e-05
TRMT11	1.17326e-05
PARG	1.17249e-05
HSCB	1.17235e-05
SERINC5	1.17226e-05
INO80	1.17195e-05
GDI1	1.17165e-05
FBXW7	1.17146e-05
PARVB	1.17124e-05
MRPS35	1.17115e-05
ENSSSCG00000012602	1.17088e-05
PLEKHA3	1.16919e-05
LY9	1.16865e-05
TMED7	1.16807e-05
CASP8	1.16795e-05
FAM160B2	1.16789e-05
ENPP4	1.16774e-05
ENSSSCG00000007322	1.16726e-05
DYNC1H1	1.16712e-05
PUS3	1.16668e-05
RIDA	1.16634e-05
UBE2M	1.16511e-05
CISH	1.16487e-05
ZNF622	1.16454e-05
TBCB	1.16453e-05
ENSSSCG00000009911	1.16407e-05
SAP130	1.16406e-05
ENSSSCG00000014267	1.16406e-05
ENSSSCG00000005738	1.16391e-05
AUH	1.16359e-05
SRPK2	1.16257e-05
UXS1	1.16193e-05
MRPS12	1.16125e-05
ENSSSCG00000022178	1.15942e-05
DAZAP1	1.15889e-05
ENSSSCG00000033880	1.15831e-05
ENSSSCG00000012264	1.15774e-05
STARD3NL	1.1577e-05
ANKRD10	1.15756e-05
ALKBH7	1.15591e-05
CDKN3	1.15518e-05
TVP23C	1.15495e-05
GMPR2	1.15488e-05
NPC2	1.15432e-05
PFDN2	1.15339e-05
ZMYM4	1.15289e-05
CD44	1.15155e-05
CSNK1G1	1.1495e-05
PRPF6	1.14267e-05
TP53	1.14219e-05
APIP	1.13773e-05
TLN1	1.13679e-05
UBFD1	1.13579e-05
PPP1CB	1.13231e-05
MED24	1.12558e-05
ENSSSCG00000039331	1.12335e-05
DHX9	1.12317e-05
CAPN1	1.12145e-05
DAZAP2	1.11856e-05
NMRAL1	1.1184e-05
EIF1	1.11838e-05
BACH1	1.11819e-05
COMMD5	1.11175e-05
ENSSSCG00000002841	1.10757e-05
RPL36AL	1.09497e-05
CD5	1.06659e-05
SLC25A3	9.84469e-06
ENSSSCG00000008433	9.70011e-06
ATP5ME	9.69118e-06
NFKB1	9.60554e-06
PDIA3	9.58513e-06
TMED9	9.54232e-06
CD3G	9.43647e-06
FKBP11	9.39249e-06
PDIA4	9.3852e-06
ENSSSCG00000001696	9.33533e-06
ZFC3H1	9.30994e-06
MAP2K6	9.30411e-06
TM6SF1	9.29993e-06
MAT2A	9.29706e-06
MRPL36	9.29249e-06
RIF1	9.2836e-06
ENSSSCG00000013391	9.27685e-06
AAGAB	9.27357e-06
GPI	9.26619e-06
NPEPPS	9.26413e-06
ENSSSCG00000013874	9.26401e-06
ENSSSCG00000030131	9.26375e-06
PTGER2	9.25286e-06
IL17RA	9.2523e-06
ARFGEF2	9.23724e-06
MRI1	9.2214e-06
CD40LG	9.21648e-06
CYLD	9.21513e-06
YIF1B	9.21268e-06
LRRC1	9.20672e-06
PLCL1	9.20583e-06
FAM214A	9.20042e-06
WDR25	9.1989e-06
UROS	9.19865e-06
TFRC	9.19158e-06
NOP58	9.18813e-06
BICRAL	9.18489e-06
MX2	9.17796e-06
RABGEF1	9.17794e-06
ABCC10	9.1747e-06
ADORA2B	9.1745e-06
ENSSSCG00000020677	9.16857e-06
NUCKS1	9.15527e-06
GNLY	9.14748e-06
NDUFS2	9.14672e-06
NFATC2	9.13843e-06
UROD	9.13242e-06
RBMS1	9.13135e-06
ENSSSCG00000016949	9.12163e-06
GGPS1	9.11914e-06
CCDC167	9.11853e-06
ETNK1	9.11605e-06
PALM3	9.11493e-06
DNMT3A	9.1132e-06
NAA38	9.11245e-06
H2AFY	9.11095e-06
C5orf15	9.10417e-06
GFPT1	9.10353e-06
DPM3	9.10349e-06
ENSSSCG00000017670	9.10329e-06
ENSSSCG00000028633	9.10235e-06
ENSSSCG00000007826	9.10213e-06
ENSSSCG00000004082	9.10192e-06
ACSL4	9.10154e-06
THG1L	9.10011e-06
CAMK2G	9.09597e-06
ALDH3A2	9.09227e-06
NCLN	9.08644e-06
SMC4	9.08559e-06
GSPT2	9.08229e-06
ZNF624	9.07744e-06
VEZF1	9.07679e-06
TXN2	9.07573e-06
CHML	9.07265e-06
SMARCA2	9.07008e-06
GGACT	9.06969e-06
AS3MT	9.06929e-06
ETNK2	9.06891e-06
GBP2	9.06847e-06
PIGA	9.06757e-06
ATG16L1	9.06739e-06
AKNA	9.06692e-06
STAT6	9.06525e-06
PIGM	9.05896e-06
MOCS2	9.05688e-06
LRRC70	9.05444e-06
MTREX	9.0532e-06
KDSR	9.05266e-06
KLHL18	9.05062e-06
ENSSSCG00000022912	9.04957e-06
RBM14	9.04892e-06
ENSSSCG00000027905	9.04627e-06
RFTN1	9.03986e-06
LMNA	9.03862e-06
RAB3GAP2	9.03794e-06
PIK3R1	9.03748e-06
PTGDR2	9.03664e-06
RFESD	9.03635e-06
FADS2	9.03614e-06
OXSM	9.03614e-06
ENSSSCG00000011081	9.03614e-06
PPP2R5B	9.03613e-06
RRP36	9.03558e-06
ZNF385A	9.03228e-06
STAR	9.02797e-06
SFXN2	9.0271e-06
UBN2	9.02619e-06
DDX58	9.02458e-06
DPF2	9.02431e-06
MLLT1	9.02331e-06
FASTKD3	9.0226e-06
RAD54L2	9.02256e-06
RSC1A1	9.02249e-06
MTA2	9.02052e-06
DHX15	9.01881e-06
DHX36	9.01849e-06
BPHL	9.01503e-06
NOL11	9.01363e-06
RAB3GAP1	9.01074e-06
STK39	9.00979e-06
TDRD3	9.00901e-06
FAM53B	9.00901e-06
FAM222B	9.00828e-06
POLR2H	9.00816e-06
ABHD1	9.00556e-06
MAD1L1	9.00472e-06
SCNM1	9.00286e-06
MTMR10	9.00178e-06
SLC30A5	9.00164e-06
TUT4	9.00157e-06
SLC4A1AP	9.00129e-06
ENSSSCG00000017146	9.00054e-06
GRN	9.00029e-06
PPBP	9.00002e-06
TXNDC5	8.99615e-06
DPM1	8.99607e-06
STAG1	8.9956e-06
ENSSSCG00000024791	8.99554e-06
DOC2A	8.99554e-06
ENSSSCG00000037009	8.9955e-06
GATAD2B	8.99498e-06
MED23	8.99496e-06
ENSSSCG00000033700	8.99483e-06
GCNT1	8.99399e-06
PIGK	8.99272e-06
SKA3	8.99186e-06
MOSPD3	8.99109e-06
CORO1B	8.99062e-06
TMCO3	8.98606e-06
VPS36	8.9824e-06
ETFDH	8.97945e-06
NDUFV2	8.97815e-06
COPS7A	8.97815e-06
DDX20	8.97309e-06
RTF1	8.97114e-06
BNIP2	8.97104e-06
ENSSSCG00000010519	8.97069e-06
ALKBH8	8.96865e-06
ENSSSCG00000016096	8.96808e-06
ENSSSCG00000032552	8.96686e-06
PLAGL1	8.96622e-06
TAF1C	8.96598e-06
MRPL39	8.96594e-06
PRXL2A	8.96565e-06
HNRNPH2	8.96555e-06
E2F2	8.96507e-06
CCDC91	8.96459e-06
COX7A1	8.96451e-06
TXK	8.963e-06
ARG2	8.96245e-06
EARS2	8.96142e-06
BUB3	8.95902e-06
BTAF1	8.95855e-06
CFAP20	8.95852e-06
FBXO33	8.95841e-06
ENSSSCG00000011506	8.95657e-06
DIABLO	8.95587e-06
ENTR1	8.9538e-06
ENSSSCG00000036688	8.95276e-06
TLE1	8.94771e-06
ZBTB46	8.94746e-06
ENSSSCG00000026689	8.94707e-06
CEP170	8.94701e-06
COMT	8.94677e-06
DYNC1LI1	8.94468e-06
SYNGR2	8.94394e-06
ZC3H12D	8.9436e-06
C2CD2L	8.94288e-06
LIMD1	8.94286e-06
STX4	8.94251e-06
ENSSSCG00000029066	8.94197e-06
ENSSSCG00000032594	8.94188e-06
RFC4	8.94188e-06
ENSSSCG00000039978	8.9412e-06
THAP5	8.93223e-06
ALDH4A1	8.93174e-06
QDPR	8.92982e-06
TKFC	8.92955e-06
RBM12B	8.92952e-06
ENSSSCG00000014893	8.9292e-06
GABBR1	8.92908e-06
CCDC62	8.92512e-06
VPS72	8.92506e-06
SORT1	8.9247e-06
RNF219	8.92255e-06
PUS1	8.92124e-06
ENSSSCG00000033024	8.9208e-06
TP53I13	8.91863e-06
KLHL28	8.91708e-06
GGA1	8.91615e-06
CBLB	8.91611e-06
SLC25A5	8.91552e-06
ERO1A	8.91519e-06
SCLY	8.9118e-06
PDE3B	8.91071e-06
NDUFV3	8.90896e-06
CEP164	8.9077e-06
RNF166	8.90729e-06
CCDC102A	8.90692e-06
SHC1	8.9067e-06
NGDN	8.90619e-06
CTSH	8.90424e-06
POMK	8.90351e-06
UTP11	8.90306e-06
KHSRP	8.90286e-06
LPIN2	8.90259e-06
MARK2	8.90208e-06
CD2	8.90208e-06
SLC16A4	8.90044e-06
PCM1	8.89761e-06
DDX19B	8.89501e-06
LONP1	8.89454e-06
TOMM70	8.89335e-06
TOM1	8.89328e-06
PTPDC1	8.89325e-06
CHCHD5	8.89267e-06
EED	8.8914e-06
PARP12	8.89124e-06
ENSSSCG00000036626	8.88889e-06
CCNY	8.88755e-06
HGH1	8.88576e-06
SDC4	8.88493e-06
ENSSSCG00000024950	8.88454e-06
FBXO4	8.88422e-06
HERC4	8.88171e-06
MTMR3	8.88008e-06
AKR1B1	8.8782e-06
LUC7L	8.87766e-06
TCP11L2	8.87702e-06
CDK12	8.87463e-06
CAMLG	8.87402e-06
TMEM18	8.87299e-06
REC8	8.87152e-06
ENSSSCG00000026140	8.87037e-06
ABCB7	8.86987e-06
ENSSSCG00000018063	8.86872e-06
ENSSSCG00000004024	8.86788e-06
TNPO3	8.86683e-06
MAFG	8.86656e-06
ATP10B	8.86579e-06
WSB1	8.86254e-06
SOCS5	8.86218e-06
2021-09-09	8.86071e-06
TAOK2	8.85911e-06
MAPKAP1	8.85893e-06
RNF26	8.85869e-06
CLK2	8.85838e-06
RNASEH2B	8.85498e-06
ANKLE2	8.85482e-06
GCC1	8.85391e-06
CCNL2	8.85387e-06
CD2BP2	8.85199e-06
RNF170	8.84956e-06
ENSSSCG00000022057	8.84956e-06
ENSSSCG00000036407	8.84956e-06
HNRNPD	8.84877e-06
ILF3	8.84855e-06
TRMT112	8.84834e-06
PPP2CB	8.84593e-06
PARP11	8.8434e-06
NELFB	8.8414e-06
CORO2A	8.83967e-06
ZDHHC15	8.83719e-06
RELL1	8.83668e-06
ENSSSCG00000039612	8.83664e-06
JAZF1	8.83652e-06
KDM8	8.83246e-06
SPPL3	8.83123e-06
DECR1	8.82756e-06
HSPA9	8.825e-06
PYM1	8.82414e-06
ENSSSCG00000023560	8.82357e-06
CCNJ	8.82357e-06
ENSSSCG00000031744	8.82353e-06
CREG1	8.82353e-06
TTL	8.82147e-06
ENSSSCG00000033601	8.82079e-06
SHARPIN	8.81868e-06
C15orf61	8.81838e-06
IER5	8.81756e-06
INTS13	8.81736e-06
DDX24	8.81694e-06
UGDH	8.81648e-06
TAZ	8.81516e-06
ABCD3	8.8149e-06
SRPRA	8.8149e-06
NPM3	8.81432e-06
NUCB1	8.81274e-06
DNAJC7	8.81119e-06
PRPF38A	8.80749e-06
VPS53	8.80678e-06
KLHL15	8.8062e-06
USP37	8.80489e-06
SNX8	8.80316e-06
PSMD13	8.80284e-06
SPOPL	8.80097e-06
ENSSSCG00000009241	8.79992e-06
ENSSSCG00000040264	8.79908e-06
CEBPG	8.79811e-06
NDUFAF4	8.79336e-06
UTP18	8.79294e-06
MIIP	8.79153e-06
SCYL2	8.79025e-06
METTL21C	8.78978e-06
CSNK2A2	8.78948e-06
BCS1L	8.78932e-06
SNX19	8.78908e-06
ARHGAP30	8.78844e-06
LRCH1	8.78791e-06
ENSSSCG00000019375	8.78614e-06
ENSSSCG00000009128	8.78272e-06
AIDA	8.78233e-06
ACAP1	8.78162e-06
IFIT1	8.78095e-06
PDE4B	8.77409e-06
TNK2	8.77395e-06
ENSSSCG00000005437	8.77294e-06
NR4A2	8.77224e-06
IFNAR1	8.77197e-06
ESYT2	8.76861e-06
TYW3	8.7684e-06
TMED10	8.7683e-06
SLF1	8.76781e-06
ENSSSCG00000033814	8.76725e-06
ATE1	8.76577e-06
ARL10	8.76048e-06
EPC2	8.7601e-06
DNPEP	8.75884e-06
MOB1A	8.75591e-06
CDK6	8.75563e-06
FNIP1	8.75487e-06
CCDC22	8.75302e-06
MFSD14B	8.74854e-06
ENSSSCG00000009139	8.74759e-06
RPP30	8.74636e-06
HDGFL2	8.74611e-06
DKKL1	8.74067e-06
SLC25A12	8.74042e-06
LANCL1	8.74017e-06
XPOT	8.73938e-06
MCAT	8.73936e-06
CDKN2C	8.73378e-06
WDR46	8.73377e-06
SEC63	8.73333e-06
ADAMTS10	8.72093e-06
IPP	8.72093e-06
PSMC1	8.71873e-06
ELMO1	8.71716e-06
CALCOCO2	8.71698e-06
ENSSSCG00000006559	8.7118e-06
CD3EAP	8.70827e-06
MORF4L2	8.70827e-06
WDR91	8.70827e-06
DECR2	8.69643e-06
ENSSSCG00000036745	8.69565e-06
DEF6	8.69565e-06
ACTN4	8.68955e-06
AMFR	8.68619e-06
CRY1	8.67855e-06
DHX58	8.67783e-06
DCLRE1C	8.67431e-06
ARRDC3	8.66338e-06
RASSF7	8.66161e-06
PLOD3	8.65934e-06
OGDH	8.65593e-06
SOS1	8.65346e-06
DRAP1	8.65155e-06
NEK6	8.65104e-06
ALG13	8.64789e-06
SIRT2	8.6475e-06
ACTR8	8.64553e-06
CINP	8.63281e-06
PRRC2B	8.62867e-06
UBASH3B	8.62619e-06
MPV17L2	8.62325e-06
POLD1	8.62266e-06
GOT1	8.61284e-06
DNASE2	8.60954e-06
ENSSSCG00000037324	8.60741e-06
GTF2F1	8.60131e-06
SKA2	8.59832e-06
FLOT1	8.58362e-06
ATG3	8.58229e-06
SMC2	8.55998e-06
EDF1	8.54121e-06
ANAPC7	8.53313e-06
DDX21	8.53308e-06
RASAL2	8.52495e-06
SERPINB9	8.49172e-06
ENSSSCG00000032110	8.45994e-06
ABLIM1	8.44455e-06
NPDC1	8.41993e-06
ZBTB38	8.38794e-06
SAMD9	8.36392e-06
IFIH1	8.34568e-06
TMC8	8.33569e-06
MRPS26	8.28444e-06
CPNE3	8.28027e-06
TAPBP	8.27933e-06
ENSSSCG00000008170	8.23684e-06
ARHGAP4	8.17092e-06
ENSSSCG00000000405	8.16721e-06
SCG5	8.16583e-06
FUCA2	8.11928e-06
MOV10	8.06649e-06
NPL	7.90923e-06
EZR	7.71243e-06
CORO1A	7.66853e-06
RTRAF	7.18859e-06
RASSF1	7.13418e-06
PLSCR3	6.75878e-06
ENSSSCG00000032556	6.74212e-06
POLR2G	6.7354e-06
HSD17B7	6.6008e-06
TRPS1	6.58194e-06
HSH2D	6.52485e-06
TMEM134	6.42427e-06
ENSSSCG00000025565	6.41487e-06
TADA2A	6.40916e-06
C6orf203	6.39606e-06
ACAT1	6.39499e-06
ENSSSCG00000031073	6.37037e-06
CCNDBP1	6.36937e-06
SPTSSA	6.35637e-06
GOT2	6.33568e-06
SAMD13	6.33037e-06
IRF2BP2	6.32439e-06
DDX50	6.30597e-06
WDCP	6.30184e-06
ENSSSCG00000009293	6.30178e-06
DBNL	6.29622e-06
INPP1	6.29538e-06
DCTN6	6.29504e-06
TXNDC9	6.2929e-06
ENSSSCG00000024313	6.28016e-06
ZFP2	6.27219e-06
ENSSSCG00000012757	6.26945e-06
MGST3	6.26349e-06
NOP53	6.24995e-06
ENSSSCG00000016330	6.24865e-06
ENSSSCG00000017983	6.24048e-06
ENSSSCG00000009633	6.23441e-06
ANGPTL7	6.23053e-06
EIF3L	6.22955e-06
ENSSSCG00000014094	6.22283e-06
BAG6	6.22169e-06
APPBP2	6.22116e-06
SEC22A	6.21909e-06
NBR1	6.21084e-06
ITGA2B	6.20661e-06
MKNK2	6.20497e-06
ASXL1	6.20493e-06
NAT10	6.19403e-06
CEPT1	6.18614e-06
CLEC11A	6.18353e-06
PUM3	6.18238e-06
DGKZ	6.18206e-06
NKG7	6.18176e-06
ENSSSCG00000006260	6.18129e-06
RAB21	6.18079e-06
TRAPPC2	6.17624e-06
METTL8	6.17353e-06
ENSSSCG00000007188	6.17342e-06
AACS	6.16333e-06
ABCE1	6.15893e-06
ENSSSCG00000008767	6.15787e-06
TWF1	6.15603e-06
TNPO2	6.15382e-06
TADA1	6.15339e-06
MRPL34	6.14958e-06
CSK	6.1489e-06
WAPL	6.14518e-06
PEX5	6.14439e-06
PHYH	6.14159e-06
RPH3AL	6.14108e-06
RAB39A	6.13497e-06
VWF	6.13497e-06
MKLN1	6.13423e-06
ENSSSCG00000014949	6.12786e-06
LMOD3	6.12557e-06
PTP4A2	6.123e-06
CHCHD4	6.12215e-06
STK26	6.11842e-06
EXOSC4	6.11754e-06
ENSSSCG00000030015	6.11677e-06
CDK16	6.11627e-06
ST3GAL3	6.11072e-06
DTX3L	6.10999e-06
RAB29	6.10723e-06
POGZ	6.10694e-06
LACTB2	6.10687e-06
IQCB1	6.10683e-06
SENP5	6.10672e-06
ENSSSCG00000032748	6.10637e-06
BAK1	6.10618e-06
ENSSSCG00000030478	6.10612e-06
UTP23	6.10587e-06
RCL1	6.10301e-06
ZUP1	6.10283e-06
SLC9A1	6.10075e-06
APEH	6.1e-06
ANKRA2	6.09993e-06
KLF11	6.09831e-06
ZBTB37	6.09756e-06
CAPN2	6.09756e-06
ENSSSCG00000028965	6.09756e-06
MMAB	6.09677e-06
REXO2	6.09607e-06
UNC93B1	6.0956e-06
NSRP1	6.09466e-06
RPAP3	6.09397e-06
IDH3A	6.09064e-06
PDXK	6.08828e-06
GLTP	6.08627e-06
GADD45GIP1	6.08441e-06
FBXO30	6.08303e-06
RMND5B	6.08215e-06
ENSSSCG00000038633	6.08031e-06
TP53BP1	6.07953e-06
LYSMD1	6.07903e-06
SLC4A2	6.07662e-06
RGS10	6.07601e-06
FRS2	6.0745e-06
CLP1	6.07387e-06
ENSSSCG00000008317	6.07262e-06
RER1	6.07152e-06
B4GALT1	6.0698e-06
PRKAA1	6.06862e-06
ENSSSCG00000038506	6.06793e-06
ARRB1	6.06455e-06
RUNDC3A	6.06413e-06
RTCB	6.06229e-06
AKAP8	6.06214e-06
ELAC2	6.06061e-06
PPFIA1	6.06061e-06
CCNT1	6.06061e-06
UHMK1	6.05768e-06
PEX19	6.05727e-06
BSCL2	6.05644e-06
WAC	6.0563e-06
PDCD11	6.05601e-06
NEDD4	6.05592e-06
TCAIM	6.05144e-06
FUZ	6.05144e-06
DHCR7	6.05144e-06
ARMCX3	6.05144e-06
ENSSSCG00000016687	6.05144e-06
CRNKL1	6.05144e-06
ENSSSCG00000035768	6.05118e-06
SNX16	6.04977e-06
ENSSSCG00000033369	6.04799e-06
ESS2	6.04714e-06
NCBP3	6.04703e-06
MTIF3	6.04695e-06
ZBTB7A	6.04585e-06
ENSSSCG00000032297	6.04583e-06
ACSF3	6.04444e-06
INTS6L	6.04399e-06
TATDN1	6.04283e-06
NHLRC3	6.04252e-06
SLC35A2	6.03928e-06
[truncated: 12,388 more rows]

## Sheet: 6v24_Impurity
Supplementary File 14. Random forest pair-wise analyses of CD2 ɣ𝛿 T-cell cluster. For each model represented below the porcine scRNA-seq cluster IDs compared are shown along with the parameters used and resulting OOB prediction error. Variable importance was assigned by measuring node impurity (Impurity) and using permutations (Permutation). Features that reduced error in predictive accuracy are …
Gene	Impurity
ENSSSCG00000032017	37.4733
RHEX	33.2318
SRGN	21.7002
CD2	20.1087
LCK	15.1696
TRAT1	15.0971
ENSSSCG00000014565	13.1428
PLAC8	9.96724
IKZF2	7.82017
ENSSSCG00000013260	7.71322
ENSSSCG00000023584	7.6465
CD52	5.96285
ITGA4	5.85674
SMC4	5.80412
TOX	5.72921
NPY	5.67526
ENSSSCG00000029596	5.52342
FCRL6	5.44322
CAMK4	5.35907
ENSSSCG00000037142	5.18028
ENSSSCG00000037885	4.9524
ITM2B	4.66249
BLK	4.55261
ANXA1	4.32315
B2M	4.23818
ENSSSCG00000003042	4.19519
GATA3	4.047
EOMES	3.99995
LAPTM5	3.78521
CAPG	3.74322
ENSSSCG00000017032	3.47971
ENSSSCG00000034914	3.44376
FSCN1	3.22898
SAMSN1	3.02201
ENSSSCG00000000635	2.93289
STMN3	2.90316
COTL1	2.80985
ENSSSCG00000012119	2.63447
HMGN3	2.55583
S100A11	2.37729
STK17B	2.37116
PPP1CC	2.32599
ENSSSCG00000040155	2.23137
S100A4	2.22246
LGALS1	2.22121
S100A6	2.21968
XCL1	2.18984
ENSSSCG00000003930	2.16501
ENSSSCG00000033734	2.09191
SELL	2.07833
JAML	2.03038
PSIP1	2.00727
ENSSSCG00000039658	1.97659
PTMA	1.94181
ENSSSCG00000033721	1.92385
NREP	1.90141
ENSSSCG00000034617	1.86009
ARHGAP5	1.8488
IL2RB	1.80784
FCER1A	1.79928
KIT	1.78246
CD6	1.65003
ENSSSCG00000026217	1.6349
RCAN3	1.62771
RPS11	1.56085
PARK7	1.54677
STARD4	1.479
ENSSSCG00000011234	1.42978
STMN1	1.39391
YBX3	1.38618
IL6R	1.38267
PIK3AP1	1.34539
PLEKHF2	1.30437
ENSSSCG00000003691	1.29409
TPM1	1.28426
ENSSSCG00000001229	1.26986
FAM49B	1.24937
ZAP70	1.21761
GPX1	1.21307
EMP3	1.18
ENSSSCG00000005095	1.165
CCR9	1.15454
PTPN22	1.15364
ADGRG1	1.13614
CD8A	1.0775
CD74	1.07239
ENSSSCG00000008433	1.06778
RPL39	1.06492
ABLIM1	1.06331
RPS16	1.0604
ENSSSCG00000037566	1.05849
S100A10	1.05758
ARPC1B	1.04687
RHOH	1.04662
ENSSSCG00000031088	1.04614
ARHGDIB	1.03655
SASH3	1.02821
PIK3R1	1.00718
SNTB2	1.00477
ATP6V1G1	0.982236
EPHB6	0.967006
ENO1	0.922451
CTSW	0.918565
RPL10	0.907814
PTPN1	0.894713
GNA15	0.883177
SGCA	0.881272
CALM1	0.879847
PYCARD	0.873134
UBASH3B	0.859102
TCF7	0.831524
RPL23	0.826999
DGKZ	0.823713
CYBRD1	0.812005
H3F3B	0.805821
CTSD	0.791584
TST	0.762536
ENSSSCG00000013720	0.760297
ENSSSCG00000015664	0.741351
HES1	0.739053
RESF1	0.733807
FADS3	0.733392
VIM	0.728551
ENSSSCG00000014855	0.726327
NAPSA	0.711057
PECAM1	0.706276
ENSSSCG00000034448	0.703536
SH3BGRL3	0.685733
COX3	0.681997
HPSE	0.681512
SLC11A2	0.662786
ENSSSCG00000022912	0.6465
TAGAP	0.637629
GYPC	0.630419
ITGAM	0.630023
ITGB2	0.627919
DGKA	0.60754
ZNF683	0.60631
LSP1	0.587565
ENSSSCG00000012166	0.583852
ACTG1	0.583184
TSPO	0.579262
RPLP2	0.577323
PVRIG	0.573059
SNX10	0.572426
PHACTR2	0.566942
SLC25A24	0.561503
ELK3	0.56056
TFDP2	0.560214
UBAC2	0.558442
ENSSSCG00000039544	0.552664
ENSSSCG00000008032	0.549084
IFT80	0.548991
ENSSSCG00000001455	0.544279
ENSSSCG00000027826	0.537569
DCK	0.532804
FLNB	0.529079
RIN3	0.528516
EMB	0.528247
ENSSSCG00000038507	0.526255
GSTA4	0.517245
ENSSSCG00000009327	0.504655
DAPL1	0.502212
LPAR6	0.502051
MGST1	0.498753
LAX1	0.496725
HLA.DRA	0.494455
ENSSSCG00000007435	0.492516
HMOX2	0.49119
ENSSSCG00000035080	0.48995
ITM2C	0.48948
ENSSSCG00000033090	0.489164
FYB1	0.481498
IFI6	0.481211
MAF	0.480489
UBB	0.47648
SOD1	0.474185
TMSB10	0.472484
ENSSSCG00000001341	0.471453
NCK1	0.469543
BZW1	0.464109
ND4	0.458177
CRLF3	0.458001
ENSSSCG00000036296	0.457969
GSN	0.455859
PTPRC	0.452141
LY6D	0.444933
ENSSSCG00000027790	0.442952
ENSSSCG00000017509	0.441972
ENSSSCG00000040273	0.433748
MARCKS	0.42316
CCDC69	0.421558
ENSSSCG00000004970	0.420315
SSR4	0.413901
TRDC	0.413213
IKZF3	0.411296
IL9R	0.411107
PKIG	0.408745
FES	0.408737
ID3	0.401577
CST3	0.399634
MYL6	0.395796
PNRC1	0.395424
ETS1	0.392996
B4GALT1	0.389541
PPP3CA	0.384715
ISG15	0.383868
THEMIS	0.381019
KXD1	0.379611
RPS14	0.375401
H2AFV	0.374155
PDCD1	0.373798
ENSSSCG00000005453	0.370874
KLF2	0.36914
ENSSSCG00000011272	0.367374
UCP2	0.365571
TSC22D4	0.363119
ENSSSCG00000039581	0.35837
OCIAD1	0.358027
TPT1	0.357152
ENSSSCG00000030197	0.356336
TSC22D3	0.352689
ENSSSCG00000011329	0.350897
ENSSSCG00000032591	0.349988
PRDX5	0.345846
CD63	0.344527
MRPS9	0.344262
CYTB	0.332442
RPS23	0.330863
VAMP8	0.330701
CD99	0.330323
ENSSSCG00000031278	0.329689
ARF6	0.329142
ENSSSCG00000006081	0.327105
RPL37	0.326477
ENSSSCG00000037775	0.32585
2021-09-11	0.325816
PDCD4	0.325012
EVL	0.323832
RPS20	0.323289
RPS6	0.322454
PPP2R5C	0.321998
RPS27	0.319652
DDAH2	0.313836
RPS17	0.312931
EIF1	0.308327
IL21R	0.308162
RPL11	0.3069
BTG1	0.306315
CGGBP1	0.304319
LTB	0.303313
ENSSSCG00000000097	0.301749
TIMP1	0.298405
RPL7	0.297987
SMARCA4	0.294185
RTRAF	0.292414
GABARAPL2	0.290653
ETS2	0.290581
BZW2	0.290459
ENSSSCG00000037595	0.290154
HVCN1	0.288428
BIRC3	0.286155
ATP6	0.284605
RPS15	0.284381
FGL2	0.283171
IPO11	0.281757
PTPN12	0.280091
PTPN6	0.279014
CXXC5	0.278801
ENSSSCG00000036618	0.277235
HSPB1	0.275812
SUMO2	0.274831
PTPN18	0.274697
TRAF3IP3	0.274409
H3F3A	0.273447
ENSSSCG00000025928	0.273291
MIF	0.272847
ENSSSCG00000033019	0.272354
EEF1B2	0.270873
KRAS	0.269844
RPL34	0.269797
RPL35	0.269748
NIPSNAP3B	0.269558
ENSSSCG00000035811	0.269313
TXNIP	0.269156
IFITM3	0.269014
ENSSSCG00000013889	0.267161
ENSSSCG00000036716	0.266201
ENSSSCG00000014267	0.265576
KLRK1	0.263874
GPR183	0.262806
NDUFS8	0.261372
ENSSSCG00000011952	0.261176
CD247	0.259283
PRKCB	0.258021
ENSSSCG00000001063	0.257071
TUBA1B	0.256965
ENSSSCG00000014540	0.256593
MISP3	0.255571
ND1	0.254069
TMEM87B	0.252994
ENSSSCG00000009303	0.25298
FAM89A	0.25264
ENSSSCG00000015390	0.251545
ENSSSCG00000000576	0.250908
CDC42EP3	0.249572
ENSSSCG00000035768	0.248861
WAS	0.248074
CD3G	0.247406
ENSSSCG00000039740	0.246358
LYN	0.24622
CHD3	0.245841
PNRC2	0.245627
ENHO	0.245556
ARPC2	0.245467
ENSSSCG00000013597	0.243703
C1orf21	0.243164
NDUFB8	0.241925
ENSSSCG00000014569	0.241789
RPL3	0.240399
WDR1	0.239603
JARID2	0.237842
BID	0.237744
EXOC1	0.237299
TRAPPC5	0.237241
ENSSSCG00000037030	0.236493
HSD11B1L	0.236245
LCP1	0.234244
TNFSF14	0.234184
PLVAP	0.233469
FGR	0.232446
RPS21	0.231759
RAB10	0.231591
RPS9	0.231071
YPEL3	0.231037
STRBP	0.230638
BAZ2B	0.230609
CCNG1	0.227422
COX1	0.227401
HSP90AB1	0.227386
BTF3	0.227102
ARPC5L	0.227087
CIRBP	0.226828
SAT1	0.226226
BIN1	0.226182
FUT7	0.225649
ENSSSCG00000016737	0.225553
ENSSSCG00000038825	0.224761
PSMA7	0.22405
RPL6	0.223271
PNISR	0.222989
RPL9	0.221762
RACK1	0.221369
REV1	0.22098
TPM3	0.220974
YWHAQ	0.22091
ENSSSCG00000008898	0.219534
NDFIP1	0.218287
RPS10.NUDT3	0.21811
FTL	0.217876
ACTB	0.216613
CFL1	0.216454
RPS5	0.215453
TRIM44	0.214742
RPL17.C18orf32	0.214542
ENSSSCG00000024974	0.213579
ATF4	0.213333
ENSSSCG00000004489	0.213065
ENSSSCG00000017239	0.212498
ARFGAP3	0.212172
ENSSSCG00000033500	0.211625
RPIA	0.21097
ENSSSCG00000005481	0.210772
MRPL57	0.210605
ENSSSCG00000020830	0.210054
PSMB8	0.209814
RASA1	0.209515
RPS12	0.208875
DYNLT3	0.208808
ENSSSCG00000033733	0.208613
GABARAP	0.206758
VAV1	0.206111
RPS3A	0.205904
RPSA	0.205726
COX6C	0.205537
LNPEP	0.204938
RPL27	0.204781
TMEM9	0.204751
ENSSSCG00000003903	0.203956
ANAPC16	0.203396
DHRS3	0.202887
SPCS3	0.202452
ENSSSCG00000033697	0.202075
ND2	0.201661
SYT8	0.20074
NTAN1	0.200532
ENSSSCG00000002550	0.20037
ENSSSCG00000039046	0.199564
ENSSSCG00000028485	0.199378
LIMD2	0.19852
CAT	0.1976
ENSSSCG00000035520	0.197554
TNFAIP8	0.195597
ACOT13	0.195362
DAZAP2	0.194369
BAG2	0.194012
RAN	0.193839
BIN2	0.193249
CNP	0.192962
RPL26	0.192556
ENSSSCG00000037081	0.192423
ENSSSCG00000016990	0.192215
CAP1	0.19189
GPX4	0.191719
ENSSSCG00000003236	0.191623
COX4I1	0.191088
SNAP29	0.19041
RPS18	0.189789
LRRC42	0.189276
CD3E	0.18909
ENSSSCG00000006418	0.189086
SNX18	0.188971
COQ8B	0.188954
SERBP1	0.188873
HBB	0.188815
RUNX1	0.188798
RPS26	0.188581
PABPN1	0.188249
OTULINL	0.187671
TXK	0.187009
NDUFS5	0.186899
TUBB	0.186691
PTPRCAP	0.186683
ENSSSCG00000026140	0.186531
COX2	0.186393
HIF1A	0.185747
ENSSSCG00000018063	0.184392
ENSSSCG00000008170	0.18424
NPM1	0.183387
ENSSSCG00000003914	0.182692
GNG2	0.18226
ARL5A	0.181928
PFN1	0.181798
ARPP21	0.179403
TTYH3	0.179398
RPLP0	0.179284
ENSSSCG00000007688	0.179266
ENSSSCG00000033987	0.1792
MRPS25	0.179014
S100A1	0.178931
ENSSSCG00000008061	0.178921
CASS4	0.176903
RPS13	0.176303
CD226	0.175683
TNRC6B	0.175436
CD1D	0.175106
PPP1R18	0.175084
MNDA	0.174825
CST7	0.173787
CALCOCO2	0.173781
CBLB	0.172728
SMAD2	0.172049
ENSSSCG00000037475	0.170894
SHISA5	0.170548
COX5B	0.169899
CCSAP	0.169181
ATP5PF	0.168446
NDUFA13	0.168393
NEIL2	0.168106
ENSSSCG00000009625	0.167913
CD53	0.167149
RAC2	0.16687
ENSSSCG00000035869	0.166856
ENSSSCG00000027196	0.166362
CYTH4	0.166045
SNRPN	0.165461
CCT2	0.164691
ND3	0.164302
ENSSSCG00000006395	0.163785
KRTCAP2	0.163623
ZNHIT1	0.163193
PABPC1	0.163177
ENSSSCG00000029830	0.163143
ABR	0.162844
GZMM	0.162749
RPL22	0.162261
RPL5	0.160766
HCST	0.160396
RAB11B	0.159813
MATK	0.159792
GSDMD	0.159685
HNRNPK	0.159242
MPZL3	0.15884
FAM78A	0.157859
ENSSSCG00000000657	0.157301
TESC	0.157119
COX7A2L	0.156832
BCAS4	0.156822
ISCU	0.156812
RPS4X	0.156236
RASA3	0.156023
FAM49A	0.155405
DDX46	0.155297
IL10RA	0.155011
PCOLCE	0.155005
NME2	0.154963
ENSSSCG00000006919	0.154923
TMEM173	0.154732
ENSSSCG00000000697	0.154632
TRMT112	0.154568
CORO1A	0.154485
TMA7	0.154032
PTPN7	0.152902
SRPK1	0.152514
SKP1	0.151453
OAZ1	0.151428
ENSSSCG00000003520	0.151336
ENSSSCG00000013064	0.151318
H2AFY	0.150867
COX8A	0.150672
SUCLG2	0.150154
ENSSSCG00000004446	0.149947
RPL10A	0.149895
FAM171B	0.149874
ENSSSCG00000038711	0.149868
RPL7A	0.149628
TIAM1	0.149058
GPR18	0.148335
ARPC5	0.148282
DBI	0.14729
RASGRP1	0.147125
ENSSSCG00000035706	0.147066
CD37	0.146843
SPG21	0.146625
MBNL1	0.146511
EEF2	0.146337
ENSSSCG00000039071	0.146267
ENSSSCG00000017213	0.146207
REL	0.145571
ENSSSCG00000039460	0.145518
TMEM123	0.145052
ENSSSCG00000012916	0.144973
HSP90AA1	0.143624
ENSSSCG00000039706	0.142614
HYPK	0.142376
IRF7	0.142363
DYNLRB1	0.142023
CCR7	0.141419
CLINT1	0.141083
HNRNPDL	0.140992
WBP1L	0.140577
IL18R1	0.140219
SCARB2	0.139985
ENSSSCG00000009239	0.139665
ENSSSCG00000036350	0.138932
ENSSSCG00000017754	0.138447
COX7B	0.137591
PRKD3	0.137589
SMARCA2	0.137498
ENSSSCG00000040294	0.137488
ARRB2	0.137376
CD81	0.13695
RABAC1	0.136686
ARL4C	0.13638
GSTO1	0.136363
SLC25A6	0.13573
KHDRBS1	0.135617
RPL36AL	0.135534
CREBZF	0.135303
ENSSSCG00000014371	0.134876
ENSSSCG00000037071	0.134628
GLIPR2	0.134618
ETNK2	0.134368
EEF1AKMT1	0.13404
ENSSSCG00000000071	0.133916
UBE2H	0.133122
ENSSSCG00000003261	0.132762
JUP	0.132683
CNBP	0.132609
TPI1	0.132523
PFDN1	0.132387
TNFRSF1A	0.13235
ENSSSCG00000034190	0.13235
VCL	0.132194
OSTF1	0.132116
ATP5PB	0.131529
EIF4G2	0.13108
ENSSSCG00000004945	0.130897
SCAND1	0.130799
ENSSSCG00000023158	0.130778
PARVG	0.13071
AKT2	0.130602
GAPDH	0.130513
NDUFAF3	0.130196
NFKBIA	0.130144
PDGFB	0.130128
ENSSSCG00000000405	0.130046
ARL6IP1	0.12989
PSMB4	0.12959
SAMHD1	0.129263
ENSSSCG00000015710	0.129209
SLAMF7	0.128904
ENSSSCG00000035256	0.128867
RAP2A	0.128521
STAT1	0.128504
PPM1A	0.128489
ENSSSCG00000031912	0.128332
SRSF2	0.128209
U2SURP	0.128173
VPS28	0.127995
EIF2S2	0.127884
IFNAR1	0.127865
PDK1	0.127776
ENSSSCG00000036013	0.127534
NOP10	0.127402
NAP1L1	0.127346
PSMB1	0.127218
COX7C	0.126741
SNRK	0.126523
ENSSSCG00000027573	0.126497
YWHAZ	0.126153
RSRC2	0.126014
EIF4A2	0.125921
EIF3K	0.125613
EDF1	0.125457
CTSC	0.125357
ENSSSCG00000037187	0.125331
ENSSSCG00000027565	0.124729
DYNLL1	0.124326
S1PR1	0.124259
ENSSSCG00000039731	0.124239
MRPS15	0.123456
EIF5B	0.123297
RCSD1	0.123241
ENSSSCG00000038359	0.123239
2021-09-06	0.123217
NUDT21	0.123139
UBXN1	0.122634
ENSSSCG00000013366	0.122471
TBCA	0.122378
CSRP1	0.122317
SYTL3	0.122258
HMGN2	0.121733
BCAP31	0.12173
2021-09-01	0.121515
TGFB1	0.121204
PCBP2	0.120413
SMARCE1	0.120184
DDX5	0.119943
IGFBP2	0.119942
ENSSSCG00000004963	0.119607
FNBP4	0.119492
CUL3	0.119467
SRI	0.119311
ANKRD10	0.11915
HNRNPM	0.119085
ENSSSCG00000006376	0.118943
CXCR4	0.118824
ENSSSCG00000037299	0.118636
PAIP2	0.118591
PLP2	0.118347
ENSSSCG00000034709	0.118244
BRK1	0.117864
HNRNPU	0.117778
ENSSSCG00000012654	0.117704
ENSA	0.117687
SEC61B	0.117249
GMPR	0.117136
SEC62	0.117038
GRB2	0.116422
ITGB7	0.116243
DDX17	0.116144
RAP1B	0.116055
MVB12B	0.116006
RALY	0.115983
MMADHC	0.115841
LCN2	0.115824
CTNNBIP1	0.11531
IFIT1	0.115298
ENSSSCG00000027491	0.114977
LSM14A	0.114888
ENSSSCG00000040529	0.114705
SLC9A3R1	0.114411
PKM	0.114155
DDOST	0.113485
ACP1	0.113246
ACSS3	0.113175
TPM4	0.113097
ENSSSCG00000004145	0.113089
BRD4	0.112371
ECHS1	0.112217
FLI1	0.112166
ENSSSCG00000037364	0.111729
TMEM59	0.111441
ENSSSCG00000024588	0.11123
CCNI	0.111136
KDSR	0.111048
SON	0.110902
SKAP1	0.110567
RNASEH2B	0.110484
PRELID1	0.110466
ENSSSCG00000001097	0.110386
COX7A2	0.110182
EIF3E	0.110137
MAX	0.110117
ENSSSCG00000037602	0.110053
CCDC50	0.109967
HSPA8	0.109188
GADD45GIP1	0.108638
ARGLU1	0.108528
ENSSSCG00000034527	0.108231
VASP	0.108165
C12orf10	0.108069
NUCKS1	0.107958
FBXO39	0.10785
RNF44	0.107714
ASPSCR1	0.107653
S100A13	0.107422
PSMB9	0.107167
CEP170	0.107155
MX1	0.107106
ILF2	0.106954
TRIM13	0.106892
HIKESHI	0.106833
EPSTI1	0.106806
SARS	0.106727
IQGAP1	0.106709
ENSSSCG00000002907	0.106672
ENSSSCG00000012397	0.106597
HSPA5	0.106565
PRKACB	0.106475
CD38	0.106438
PPIB	0.106169
GMFG	0.106085
ORAI3	0.106073
ENSSSCG00000027907	0.106032
RAP1A	0.105958
RBBP6	0.105957
MYO1G	0.105701
PLIN3	0.105487
EEF1D	0.105463
RNF7	0.105458
ARHGDIA	0.105351
BPTF	0.105345
ARHGAP9	0.105268
ENSSSCG00000012178	0.105266
SAP18	0.105255
PDPK1	0.10523
ENSSSCG00000004666	0.105226
ENSSSCG00000031773	0.105222
FKBP11	0.104947
LXN	0.104845
NOP53	0.104488
PHGDH	0.104133
ST6GALNAC4	0.104115
MAP1LC3A	0.103979
ENSSSCG00000000905	0.103955
RHOG	0.103943
ENSSSCG00000029857	0.103879
C6orf62	0.103833
SARNP	0.103728
AHR	0.103517
ENSSSCG00000013315	0.103489
LBR	0.103343
APPL2	0.10322
SCAPER	0.103115
SH2D1A	0.103086
JAK1	0.102766
PBRM1	0.102715
SIGIRR	0.102567
UQCC2	0.102094
ENSSSCG00000033744	0.102044
NUB1	0.102
TCF25	0.10191
CD44	0.101609
ATP5F1E	0.101524
SFT2D1	0.101422
ADSL	0.101206
UBE2D3	0.101092
FAXDC2	0.101083
HSPE1	0.101064
ENSSSCG00000035507	0.101
ENSSSCG00000033909	0.100952
MRPL12	0.100888
ARL6IP5	0.100852
CTSB	0.100839
PIK3IP1	0.10081
RSU1	0.100377
SCAF11	0.100352
ENSSSCG00000036096	0.100196
STRAP	0.100179
ENSSSCG00000013661	0.10017
SERPINF1	0.100051
ENSSSCG00000001414	0.0999797
PRPF4B	0.0998656
CAPZB	0.0998566
CCT7	0.0993344
ACAT1	0.0990357
RASGRP2	0.0988415
CYTIP	0.0988075
CD28	0.098797
EIF4B	0.0985967
SELENOH	0.0985805
ROCK1	0.0984235
NUDC	0.0983203
CCT5	0.0978782
LZTS1	0.0978238
SRRM1	0.09781
MAN1C1	0.0977303
DOCK8	0.0976822
SRSF5	0.0976233
NDUFC1	0.097518
TAX1BP1	0.0973669
DCXR	0.0972645
INVS	0.0972161
SPCS1	0.097214
JCHAIN	0.0971749
UBE2L6	0.0970259
IDH2	0.0969819
ENSSSCG00000040857	0.0967283
ENSSSCG00000036988	0.0966197
EZR	0.0965645
GPSM3	0.0962298
ARPC4	0.0960159
KAT6B	0.095935
ERAP2	0.0957604
ENSSSCG00000005436	0.0954037
ENSSSCG00000002004	0.0953233
CDIPT	0.0951375
ENSSSCG00000023331	0.0951262
NBEAL2	0.0950187
SELENOF	0.0949822
PFDN2	0.0948792
CSK	0.0948612
AUP1	0.094852
TLE5	0.0948279
FKBP8	0.094735
CD3D	0.0946633
TRAPPC6A	0.0940437
ERBIN	0.0940187
ENSSSCG00000000663	0.0938539
PRMT1	0.0937504
HMGB2	0.0936923
TRIM32	0.0936768
SF3B6	0.0934748
SNRPE	0.0934698
SSR2	0.0934687
HNRNPH3	0.0934416
ENSSSCG00000001075	0.0933994
SIPA1	0.0933625
HERC5	0.0933316
MSN	0.0932471
TOMM7	0.0930733
ITPRID2	0.0930087
CCNG2	0.0929934
ENSSSCG00000025499	0.0928548
STK38	0.092742
PPP4R3B	0.0927197
ENSSSCG00000039980	0.0926675
ASAP1	0.0925233
STRADB	0.0924901
TKT	0.0922977
ENSSSCG00000005656	0.0922439
C12orf57	0.0917659
ENSSSCG00000028479	0.0917288
ILK	0.0916911
SCML4	0.091622
CDC42SE2	0.0915832
TCF3	0.0915766
ATP5PO	0.0915341
EIF6	0.0915333
ENSSSCG00000002505	0.0914789
ENSSSCG00000020790	0.0914188
PLEKHA2	0.0913965
ENSSSCG00000039407	0.0913101
ASB9	0.091177
DIABLO	0.0911652
TRAPPC2L	0.0911071
ENSSSCG00000013453	0.090709
TNFSF11	0.0906848
HBS1L	0.0906812
ENSSSCG00000003348	0.0906099
RAB5A	0.0903564
SRSF10	0.0903126
CCDC9	0.0902155
LAT	0.0902059
CHIC2	0.0902036
ENSSSCG00000004307	0.0900881
ENSSSCG00000013992	0.0900596
PFDN4	0.0900515
ENSSSCG00000007188	0.0900466
TPR	0.0900072
KPNB1	0.0899941
TPM2	0.0899522
CHD1	0.0899332
ENSSSCG00000009926	0.0897908
UBXN11	0.089701
ARHGAP15	0.0896839
ATRX	0.089655
CAPRIN1	0.0892938
LRRC70	0.0892564
CUEDC2	0.0890897
SSB	0.089088
MPHOSPH8	0.089053
SPON2	0.0890002
ENSSSCG00000007203	0.0888043
ATP5MC2	0.0887647
EIF3H	0.088605
LAT2	0.0886012
CYFIP2	0.0886002
ENSSSCG00000036114	0.0885722
SLA2	0.088548
NDUFB10	0.0884486
TRIB2	0.0884482
EIF3I	0.0883985
ATP5MC1	0.0883842
PRKAR1A	0.088368
ZNF395	0.0882402
LAMTOR4	0.0882233
CWF19L2	0.0881195
DDX60	0.0880293
SRRM2	0.0877784
PSMF1	0.0877291
UBE2B	0.0876535
SCG5	0.0874986
ENSSSCG00000007978	0.0874692
CMAS	0.0874395
MRPL20	0.0874202
PDIA3	0.0873882
ENSSSCG00000006061	0.0872443
EIF3D	0.0871699
ENSSSCG00000013878	0.0871625
ATP5MD	0.0869775
PRRC2C	0.0869621
ENSSSCG00000010203	0.0869405
ARF4	0.0868538
CSTB	0.0868148
POLR2G	0.0867833
ND5	0.0864318
BCAT1	0.0863771
AKR1A1	0.0863722
PNN	0.0863378
ATP5F1A	0.0862968
ENSSSCG00000001456	0.0862268
TXNDC15	0.0862211
ENSSSCG00000013721	0.0861216
PPP2CA	0.0861127
ME2	0.0860162
ENSSSCG00000006628	0.0860013
ENSSSCG00000003253	0.0858892
UBC	0.0858556
SH3BGRL	0.0857953
ENSSSCG00000024263	0.0855889
ZFP36L2	0.0855003
STXBP3	0.0854908
RGS19	0.0853684
TMEM50A	0.085303
YWHAB	0.0852833
2021-09-07	0.085266
PPP2R5E	0.0852308
TMEM131L	0.085225
MID1IP1	0.0851857
ELMO1	0.0851322
FNBP1	0.0851044
TMEM258	0.085015
MICOS10	0.0849676
CHID1	0.0849642
ENSSSCG00000010158	0.0849554
RAB27A	0.0848534
ENSSSCG00000034802	0.0847855
DDX21	0.0846501
ENSSSCG00000007743	0.0845407
RHOQ	0.0844215
CAMTA2	0.084419
ENSSSCG00000017928	0.0843349
ITGB1	0.084334
APOBEC3B	0.0842769
ERH	0.0841525
MX2	0.0839942
UFM1	0.0839623
GNB2	0.0837386
ENSSSCG00000012757	0.0836781
RSRP1	0.0835549
DHX58	0.0835243
SFPQ	0.0835243
TGFBR3	0.0832827
TRIM27	0.0832048
KIAA2026	0.0831241
RASSF2	0.0831131
TMBIM6	0.0830693
FGD3	0.0830535
ENSSSCG00000016758	0.0829157
ZC3HAV1	0.0828467
EIF4A1	0.0828222
COX6A1	0.0828116
RFXANK	0.0827508
EIF1B	0.0827224
PDE4B	0.0826744
SIVA1	0.0826425
PSMB7	0.0825557
ENSSSCG00000011290	0.0824792
TMEM263	0.0823493
SDCBP	0.0822748
ENSSSCG00000001396	0.082011
ARHGAP30	0.0819226
CDKN1B	0.0818859
NKTR	0.081865
ARPC3	0.0817907
SAFB	0.0817791
ENSSSCG00000004583	0.0816964
MANF	0.0816606
REX1BD	0.0815976
WDR5	0.0815699
ENSSSCG00000001398	0.0813675
RAD23A	0.0813463
ENSSSCG00000013596	0.0812687
ENSSSCG00000032003	0.0812643
RAC1	0.0812187
POLR2I	0.0810058
ENSSSCG00000023126	0.0810024
EAPP	0.0807847
CWC22	0.0807454
ENSSSCG00000038364	0.080581
DBNL	0.0805435
TRAM1	0.0805208
OSGEPL1	0.0805023
ENSSSCG00000025631	0.0804033
APBB1IP	0.0802719
CASP6	0.0802282
HIGD2A	0.080219
ICAM2	0.0801897
RGS14	0.080049
RUSC1	0.0800257
COX17	0.0798241
NKG7	0.0796912
RALA	0.0796836
CCDC181	0.0796656
UBE2V2	0.0796571
SLCO3A1	0.0796365
CD96	0.0795762
RER1	0.0794787
GBP2	0.0792118
ITGA2B	0.0792084
NDUFA9	0.0791923
CDKN2AIPNL	0.0791664
SPAG8	0.0791204
HINT1	0.0790552
CHRAC1	0.0788563
FAM32A	0.0787774
HNRNPH1	0.0786814
SPEN	0.0785514
YIPF4	0.0785291
COX5A	0.0785128
ENSSSCG00000015040	0.0784599
EML4	0.0784559
SLC25A36	0.0783644
ENSSSCG00000014013	0.0782809
ENSSSCG00000036658	0.0780492
ENSSSCG00000024313	0.0780406
MIOS	0.0780244
SDHB	0.078013
ENSSSCG00000001696	0.0779593
DONSON	0.0779571
ENSSSCG00000021560	0.0778745
LASP1	0.0778529
ZRANB2	0.0778373
SRP14	0.0778254
ENSSSCG00000016100	0.0776617
OSBPL9	0.0776483
ACTR2	0.0775964
MRPL21	0.0774479
CCT4	0.0773753
EMD	0.0771156
XBP1	0.0770538
RCC2	0.0770499
PTGES3	0.0770159
GLIPR1	0.0769984
ENSSSCG00000039612	0.0768527
RASL10B	0.0768168
CCDC124	0.0767839
TXNDC9	0.0767575
ENSSSCG00000001038	0.0767527
RILPL2	0.0767049
HPF1	0.0766905
GUK1	0.0766341
ATP5F1C	0.0765917
EMC6	0.0764123
ENSSSCG00000016711	0.076395
G3BP1	0.076319
DDIT4	0.0763166
IFI30	0.0762607
PUF60	0.0762523
UCHL5	0.0762443
SNRPD1	0.0762209
PAK2	0.076207
RAB4A	0.0761714
DPY30	0.0761435
SEC11C	0.0760872
ENSSSCG00000034868	0.0759951
MFNG	0.0759175
ENSSSCG00000035728	0.0758795
SEC63	0.0758743
RIF1	0.0758703
GLRX3	0.0758074
GRK6	0.0757303
ENSSSCG00000000273	0.0756899
COX6A2	0.0756738
AP2B1	0.0756466
IRF2	0.0756087
PSME1	0.0756059
LMO4	0.075435
RHOA	0.0753769
CARHSP1	0.0753703
NEIL1	0.0752685
GPBP1	0.0752675
CD69	0.0751418
USP10	0.0751321
KARS	0.0751155
PSMB10	0.0750081
GNAI2	0.0749877
MED30	0.0749678
FKBP3	0.0749396
TRAPPC6B	0.0748882
RBBP4	0.0747077
ENSSSCG00000031580	0.0746821
PRDX4	0.0746393
POLE4	0.0746002
TMC6	0.0745269
ENSSSCG00000003885	0.0744342
MRPL52	0.0743205
HDAC1	0.0742644
PTGER4	0.0742416
PIK3CG	0.0741569
MBNL3	0.0740612
CNOT6L	0.0740408
ENSSSCG00000008057	0.074025
ATP1A1	0.0740134
TNFAIP3	0.0738096
ATP5F1D	0.0737133
WDR45	0.0735828
VPS29	0.0735822
PSMB2	0.0735666
ENSSSCG00000011798	0.0735595
CALR	0.0735143
PHB2	0.0735105
UBL3	0.0733802
ENSSSCG00000016263	0.0733405
FLOT1	0.0733296
ENSSSCG00000035048	0.0732761
SERP1	0.0732735
KIF5B	0.0732169
ENSSSCG00000008990	0.0732095
BPI	0.0731859
MORF4L1	0.0731529
RBM8A	0.0731515
CPNE3	0.073115
STAG2	0.0731078
ENSSSCG00000010517	0.0730462
C9orf78	0.0729667
ATP5ME	0.0728907
TALDO1	0.0728751
ENSSSCG00000026446	0.0728402
PPIP5K2	0.0728156
SERINC3	0.0728064
ENSSSCG00000040118	0.072798
HMCES	0.0727829
TERF2IP	0.0726577
NPB	0.0726451
ENSSSCG00000032748	0.0726171
ENSSSCG00000017626	0.0725908
PIN4	0.0725673
CHST7	0.0724805
ARID4B	0.0723756
POLR2F	0.0723352
ENSSSCG00000011506	0.0723204
ELF1	0.0723073
DUT	0.0722774
CCT3	0.072251
NLRC5	0.0722203
ENSSSCG00000021591	0.072091
ZNRF1	0.0720866
PSMD2	0.0720544
TNFAIP8L2	0.0720295
TBC1D10C	0.0720026
ENSSSCG00000015337	0.0719634
ZC3H14	0.0719113
SUMO1	0.0717366
RBMX	0.0717241
LY96	0.071713
GNB1	0.0716819
ATP6V0B	0.0715684
ENSSSCG00000035955	0.0715123
STK26	0.0714497
ENSSSCG00000035538	0.0713598
RTF1	0.0712804
TSR3	0.071237
CCND2	0.0711757
DUSP1	0.0708746
ENSSSCG00000032556	0.0708423
H2AFZ	0.0708042
PSTPIP1	0.0707918
ELAVL1	0.070608
EIF4H	0.0705992
ENSSSCG00000014850	0.0705628
ENSSSCG00000024500	0.0704914
RBM4	0.0704664
POLR1D	0.070452
MGST3	0.0703626
MYB	0.0703443
RBL2	0.0703279
SELENOT	0.0703162
SMCHD1	0.0701738
C19orf53	0.0701558
HMGA1	0.0701134
PLEK	0.0700707
ATP5MC3	0.0700642
RBPMS	0.0700621
NXT1	0.0700592
ATAD1	0.0700437
LITAF	0.0700277
LEPROTL1	0.0700245
ENSSSCG00000012811	0.0698653
CLDND1	0.0698097
SEC61G	0.0697488
VAMP5	0.0697468
APMAP	0.0696381
SCLY	0.0695937
MALT1	0.0695023
TMTC3	0.0694463
ENSSSCG00000006156	0.0694199
PPP2R5A	0.0694139
KCTD20	0.0693024
TRIP12	0.0692975
PRPF40A	0.0692317
SDF4	0.0691953
SMPD1	0.0691855
AGTRAP	0.0691074
PSENEN	0.0691021
ENSSSCG00000040248	0.0690699
NEDD8	0.0689138
HERC6	0.0688785
SCART1	0.0688309
YIPF1	0.0687168
ATP6V1F	0.0686523
CMSS1	0.0686143
DAD1	0.0685207
CDH1	0.0685185
MED4	0.0684987
MEAF6	0.0684919
GEMIN7	0.0684853
ID2	0.0684537
HDAC2	0.0684391
CSNK1G3	0.0684285
SNRPF	0.0683861
PSMC5	0.0683607
SUCLG1	0.0683405
ENSSSCG00000002996	0.0683351
CERS2	0.0683311
NIPBL	0.0682829
OPTN	0.0682677
NSD3	0.0681039
ARID2	0.0680504
ARHGEF6	0.067989
RAB2A	0.0679853
ENSSSCG00000039635	0.0679817
TMCO1	0.0679487
CHMP1A	0.0679299
GMPS	0.0679098
C11orf58	0.0678964
CYCS	0.0678658
AP2S1	0.067861
RNF2	0.0678486
DDX6	0.0678055
DNAJC8	0.0677602
ENSSSCG00000032459	0.0677579
EIF3A	0.0677567
THOC7	0.0677484
GPR171	0.0677458
PDCD5	0.0677318
CCDC32	0.067689
CELF1	0.0675366
SLC25A5	0.0675016
NDUFA1	0.0674952
RPL7L1	0.0674911
PDIA6	0.0674766
EPC1	0.0673011
LDHD	0.0671684
ENSSSCG00000008183	0.0671658
ENSSSCG00000010056	0.0671126
ENSSSCG00000024973	0.0670674
ENSSSCG00000035224	0.0670502
DZIP3	0.0669694
ENSSSCG00000033089	0.0668611
SAFB2	0.0668489
PRDX2	0.0668259
NRROS	0.066765
YWHAH	0.0666533
FAR1	0.066614
YKT6	0.066611
THOC2	0.0665876
NME1	0.0665839
NEDD9	0.0664746
VMP1	0.0664256
YPEL5	0.0663396
ADGRE5	0.0663392
NONO	0.0663392
CDC37	0.0662898
SMNDC1	0.0662889
ENSSSCG00000005768	0.0662507
LGALS3BP	0.0661889
PPIG	0.0661191
EHD1	0.0661174
TUBA4A	0.0660527
ENSSSCG00000029066	0.0660097
ENSSSCG00000007322	0.0659442
MPC2	0.0659006
TM2D1	0.0658249
MAP4K4	0.0657607
SMDT1	0.0657017
TAF1D	0.0656953
ENSSSCG00000020808	0.0656096
RAB18	0.0655805
PSAP	0.0655393
RNF146	0.0655381
COMMD1	0.0654935
MED21	0.0654669
RNF38	0.0654161
RNF10	0.0651313
MESD	0.0650762
DNAJA1	0.0650606
FAM53B	0.064999
ENSSSCG00000027085	0.0648762
POLM	0.0648742
TRPV5	0.0648676
PCNA	0.0648491
SNU13	0.0648269
HNRNPA1	0.064736
RNH1	0.0647194
BRD7	0.064714
ACP5	0.0646948
AP1G2	0.0646891
FCGRT	0.0646872
ENSSSCG00000017749	0.0646713
BDH1	0.0646253
MRPL17	0.0645858
DHRS11	0.0645387
AGO2	0.0645373
CYB5A	0.0645301
SLC35B1	0.064512
ENSSSCG00000039249	0.0644816
MRPS18B	0.0644683
HCLS1	0.0643725
TAPBP	0.0643475
ENSSSCG00000036603	0.0643312
POGLUT1	0.0643293
CTSS	0.0643211
GDI1	0.0641703
SYF2	0.0640832
ENSSSCG00000010734	0.0640665
ENSSSCG00000007719	0.0640419
LBH	0.0639567
PCMT1	0.0639336
RTF2	0.0638698
RGS10	0.0638634
PPP1R12A	0.0638226
ENSSSCG00000009145	0.0637875
API5	0.0637719
CD47	0.0637439
SSBP4	0.0637135
CAPZA1	0.063674
ENSSSCG00000037143	0.0636453
RAB1B	0.0636116
EPB41	0.0635882
SETD2	0.0635409
HP1BP3	0.0634744
KATNA1	0.0634696
TNFSF10	0.0634229
COMMD5	0.0633632
RBM39	0.0633292
PHF3	0.0632993
ENSSSCG00000002449	0.063284
RBM25	0.0632153
ENSSSCG00000028035	0.0631304
MRPS24	0.0631152
RPL26L1	0.0630536
PTGER2	0.0629776
FCMR	0.0629679
RBM38	0.0628993
PACSIN2	0.0628668
MFAP1	0.0628538
ITSN2	0.0628246
GCNT4	0.0628135
RCHY1	0.0628088
SH3GLB1	0.0627594
THOC5	0.0627213
PSMA6	0.062714
UQCR10	0.0626735
SPTBN1	0.0626667
NUCB1	0.0626646
PDAP1	0.0625949
HSPD1	0.0624741
CDC26	0.062434
CCNDBP1	0.0623925
ACYP1	0.0623746
RAB28	0.0622493
MFF	0.0622018
SYNGR2	0.0621111
CAPN1	0.0621096
PARP8	0.0619843
SLC44A2	0.0618844
SRSF6	0.0618731
ZNF260	0.0618538
RNGTT	0.061797
CINP	0.0617719
DDA1	0.0617251
ENSSSCG00000004414	0.0616841
ENSSSCG00000022176	0.0615543
ENSSSCG00000011493	0.0614174
ENSSSCG00000030015	0.0614171
CAPZA2	0.0614009
GMDS	0.0613969
SLA.DQB1	0.0612112
FAM76B	0.0612003
ENSSSCG00000003849	0.061179
MVP	0.0611675
LEF1	0.0611667
KIF2A	0.0611363
CSDE1	0.061104
ARHGAP25	0.0609389
ACRBP	0.0609365
NIFK	0.060866
CMTM3	0.0608484
SLC9A3R2	0.0607512
UBE2G1	0.0607323
ENSSSCG00000012961	0.0606423
ARID5B	0.0606368
ENSSSCG00000009128	0.0605904
ENSSSCG00000033104	0.0604996
BRIX1	0.0604968
ESD	0.0604821
DENND2D	0.0604656
ENSSSCG00000037054	0.0603394
NCALD	0.0603165
LAMTOR5	0.06031
GPD1	0.0602774
ARL2BP	0.0602138
SLC16A1	0.0601868
ENSSSCG00000000640	0.0601712
DHX9	0.0600988
ENSSSCG00000030295	0.0600778
RAB24	0.0600617
ENSSSCG00000036622	0.060059
NOL7	0.0600452
RBMS1	0.0600315
ROMO1	0.0600131
FLNA	0.0599831
FBL	0.059906
ADRM1	0.0598596
ENSSSCG00000008452	0.0597916
ENSSSCG00000014031	0.0597286
SMIM20	0.0596745
ENSSSCG00000025525	0.059648
SMARCB1	0.0596301
CAST	0.0596053
BDH2	0.0595619
RRP36	0.0595467
ATG5	0.0594766
PGK1	0.0594742
MAPK8	0.0594732
SSBP3	0.0594697
SENP5	0.0594673
GALNT1	0.059466
BAZ2A	0.0594407
THRAP3	0.0593122
FDFT1	0.0592874
PDS5A	0.0592694
CEBPB	0.0592429
AGFG2	0.0591496
NCOA4	0.0591226
DDT	0.0590576
LAMTOR1	0.0590037
HSPB11	0.0588994
AHDC1	0.0588838
ENSSSCG00000006363	0.0588385
C4orf48	0.0588062
MCL1	0.0587698
PSMA3	0.0587652
YAF2	0.0587331
KLF13	0.0587123
LAMTOR2	0.058657
RAB5C	0.0585945
SNRNP40	0.0585008
SLIRP	0.0584283
CCDC34	0.0583982
ENSSSCG00000013391	0.0583364
ENSSSCG00000014075	0.0582729
INO80C	0.0582617
M6PR	0.058236
CHCHD7	0.0581977
RALBP1	0.0581605
CASP3	0.0581261
RNF40	0.0581026
SMIM19	0.0580515
ENSSSCG00000011764	0.0580396
MMD	0.057999
SCAMP1	0.0579694
PRMT7	0.0579675
AP5Z1	0.057931
N4BP2	0.0579222
CHMP4B	0.0578768
CRYL1	0.0578594
NKAP	0.0578415
PIN1	0.0577978
ZHX1	0.0577809
SPTAN1	0.0577384
AP3M1	0.0577237
IFI35	0.0576503
ENSSSCG00000009772	0.0576424
URM1	0.0576358
USP11	0.0576258
GCHFR	0.0575837
POMP	0.0575823
PGRMC2	0.0575705
ENSSSCG00000038989	0.0575391
CDC40	0.0575211
ENSSSCG00000026719	0.0574902
ELOC	0.0574871
MDM4	0.0572887
MAPK1IP1L	0.0572325
CDC42SE1	0.0572309
SYNCRIP	0.0572104
NAA25	0.0571565
ENSSSCG00000031705	0.0571369
2021-09-09	0.0571332
RPS6KA3	0.057133
LIG3	0.0570913
ENSSSCG00000014997	0.0570768
LUC7L	0.0569609
ELOF1	0.0568899
MRPL55	0.056868
C21orf91	0.0568326
RNF8	0.0568182
ARHGAP4	0.0567567
ENSSSCG00000024776	0.0567478
KDELR1	0.0567362
ADI1	0.0567122
PDHB	0.0567034
HIST1H1E	0.0566862
AIP	0.0566385
TBL3	0.0566014
GSE1	0.0565735
GCC2	0.0565654
ANXA11	0.0565254
AKAP8L	0.0565055
ZNF146	0.0564868
TWISTNB	0.0564837
NDUFA11	0.0564765
PSMC3	0.0564662
ATP6V0C	0.0564507
CTBP1	0.0564395
PPP2R1B	0.0564315
ENSSSCG00000038444	0.0564181
ENSSSCG00000008309	0.0564166
ENSSSCG00000033212	0.0562954
ENSSSCG00000028663	0.0562375
STAT5B	0.0562138
PNPLA8	0.0561693
LCLAT1	0.0561632
SMAP1	0.0561433
PPM1G	0.0560939
ENSSSCG00000034019	0.0560827
ENSSSCG00000016262	0.0560543
PSMC2	0.0559973
SLC25A1	0.0559739
ABCD1	0.0558833
POP7	0.0558439
PRXL2B	0.0558361
CENPH	0.0558302
RAB8A	0.055749
THYN1	0.0557302
GZMB	0.0556965
SMIM7	0.0556436
RCN2	0.0556193
AMZ2	0.0555601
ATG101	0.0555355
MED10	0.0554993
GLUD1	0.0554861
BUD31	0.0554755
WDR46	0.0554691
ETFB	0.0554495
PSMB6	0.0554239
ENSSSCG00000038351	0.0553388
CWC25	0.0553008
GYG1	0.055292
ENSSSCG00000033272	0.055205
NPM3	0.0552031
ZC3H13	0.0551509
SERPINB1	0.0551453
C5orf15	0.0551375
TMEM186	0.0551321
MBP	0.0551169
POLR2C	0.0551165
ELK4	0.0550933
CITED2	0.0550822
GYS1	0.0550774
PTBP3	0.0550356
ABI1	0.0550297
TIMM29	0.0550139
COG3	0.0550123
NIN	0.0549781
RBCK1	0.0548998
STIP1	0.0548035
TCEA1	0.0547202
GPS1	0.0546928
MRPS31	0.0546895
IKZF1	0.0546333
ENSSSCG00000033653	0.0546194
ZBTB20	0.0544964
ENSSSCG00000001779	0.0544446
LAMP2	0.0544375
POLR3C	0.0544272
ENSSSCG00000001010	0.0544226
SERTAD3	0.0544216
TMED10	0.054417
RIC8B	0.0543689
MRPL28	0.0542962
SNX2	0.0542113
RRBP1	0.0541622
RPN1	0.0541298
ILKAP	0.0541195
DYNLT1	0.0540673
ENSSSCG00000008496	0.0540655
VPS4B	0.0540548
ARMCX3	0.0540521
ENSSSCG00000011077	0.0539815
TLE4	0.0539407
EMILIN2	0.0538099
ENSSSCG00000032166	0.053729
SARAF	0.0536577
COPG2	0.0535864
CBX4	0.0535631
ADD1	0.0535582
UQCRC2	0.0535163
URI1	0.053489
ENSSSCG00000040801	0.0534595
ITGA5	0.0533826
LSM12	0.0533323
ENSSSCG00000027556	0.0533209
ENSSSCG00000007253	0.0533058
WIPI2	0.0533048
GPI	0.0533007
ANXA2	0.0532939
CCDC186	0.0532888
GHDC	0.0532728
SEMA4A	0.0532665
NPC2	0.0532616
ENSSSCG00000000365	0.0532571
ENSSSCG00000037565	0.0532446
PET100	0.0531627
ENSSSCG00000010685	0.0531371
PAXX	0.0530489
MTDH	0.0530418
CCR4	0.0530093
TRPC4AP	0.0529534
SMAD4	0.0529466
MOV10	0.0529456
BPHL	0.0528996
ABCE1	0.0528708
RAB7A	0.052858
OAZ2	0.052777
IVNS1ABP	0.0527588
UQCRQ	0.0526722
ENSSSCG00000010674	0.0526286
NDUFB7	0.0526124
EWSR1	0.0525788
PHB	0.0525785
NAA20	0.0525624
IFI44L	0.0524979
UBE2V1	0.0524544
THUMPD3	0.0524538
SNX6	0.0523898
PRKCSH	0.0523787
ENSSSCG00000034314	0.0523647
USP3	0.05235
FUNDC1	0.0523468
PPP1R16B	0.0523441
MRPL41	0.0522984
CCNL1	0.0522809
TLN1	0.0522418
NOP58	0.0521829
MRPL40	0.0521649
ENSSSCG00000037869	0.0521503
PUM1	0.0521224
NDUFC2	0.052107
MRPL18	0.0520484
TMED5	0.0520452
COPB2	0.052031
PAIP1	0.0519682
TIMM13	0.051936
ESF1	0.051907
ZBTB44	0.0518901
MDH2	0.0518794
ENSSSCG00000015305	0.0518707
FHL3	0.0517878
ENSSSCG00000014094	0.0517847
ENSSSCG00000009534	0.0517724
ENSSSCG00000027675	0.0517686
CCT8	0.0517629
IMMP1L	0.0517545
TECR	0.0517146
PTP4A2	0.0517081
ENSSSCG00000036491	0.0515918
MEF2D	0.0515568
TGIF2.RAB5IF	0.0515382
DPM2	0.0514744
PDCD10	0.0514248
DOCK2	0.0514088
B3GLCT	0.0514087
TRNT1	0.0513838
VTI1A	0.0513782
MRPL58	0.0513513
COPS3	0.0513378
HERC4	0.0512578
TMEM109	0.051231
ERGIC2	0.0512282
ENSSSCG00000040897	0.0511969
SELENOS	0.0511824
EPN1	0.0511776
NDUFV2	0.0511738
MBTD1	0.0511459
IK	0.0511419
ITPA	0.0511359
NGRN	0.0511222
ENSSSCG00000007609	0.0511182
P2RY10	0.0511063
USP16	0.0510377
ENSSSCG00000014969	0.0510091
PIGM	0.0509937
ENSSSCG00000005480	0.0508792
COA3	0.0508526
ATRN	0.0508513
ENSSSCG00000032073	0.0507975
PRRC2B	0.050791
LARP7	0.0507861
PPP6R3	0.0507861
AKAP9	0.0506874
NANS	0.0506542
DNAJC10	0.050597
FPGS	0.0505871
ST6GAL1	0.0505629
PNKP	0.0505295
ENSSSCG00000039618	0.0504637
TBCC	0.0504531
MRPL39	0.0504241
ENSSSCG00000031152	0.0503682
ENSSSCG00000016970	0.0503575
TUBB4B	0.0503541
CASTOR1	0.0503078
ENSSSCG00000035762	0.050298
ST3GAL6	0.0502957
DNAJB1	0.050243
RTCA	0.0502022
SIT1	0.0501853
CFDP1	0.050177
STXBP2	0.0501238
NDUFB11	0.0501126
TMEM30A	0.0500874
ENSSSCG00000032552	0.0500535
LRCH3	0.0500278
UFD1	0.0500159
ENSSSCG00000039582	0.0500041
RNASEH2C	0.0500002
CD93	0.0499093
C12orf29	0.0499043
TNNI2	0.0499032
CLTA	0.0498958
AP3B1	0.0498116
SLC37A3	0.0497783
MRPS18A	0.04971
UBA1	0.0496974
MDH1	0.0496598
REEP5	0.049645
TXN2	0.0496231
ENSSSCG00000036877	0.0495809
RPS19BP1	0.0495215
NDUFS4	0.0495137
LRCH4	0.0495128
TAF7	0.0494737
UTP15	0.0494688
WDR41	0.0494685
ACYP2	0.0494664
ELP5	0.0494498
ENSSSCG00000015814	0.0494285
NDUFS7	0.0494178
NKX3.1	0.0493998
ENSSSCG00000032942	0.0493644
ARID1A	0.0493417
DECR2	0.0493271
SLC25A3	0.0493243
SF3A1	0.0493145
ENSSSCG00000009293	0.0492765
PNPLA6	0.0492585
HMGN4	0.0492359
ENSSSCG00000011676	0.049211
GCSAML	0.0491885
HSD17B10	0.0491724
TOR4A	0.0491679
ENSSSCG00000026064	0.0491523
PEX19	0.04915
RASSF1	0.0491468
PAFAH1B3	0.0491222
PLGRKT	0.0490908
PSMD3	0.0489957
GTF2H5	0.0489825
ENSSSCG00000035908	0.0489439
CYB5B	0.0489303
GM2A	0.0487445
DNAJB12	0.0487185
ENSSSCG00000002743	0.048696
CDK6	0.0486936
CCDC93	0.0486788
MYO1F	0.0486777
RBM26	0.0486733
SNX3	0.0486728
TMEM147	0.0486542
TAB1	0.0486454
FBXO11	0.0485877
METAP2	0.0485298
ENSSSCG00000002351	0.0485131
FH	0.0485067
RDX	0.0484915
KHDC4	0.0484708
NAT9	0.0484694
BECN1	0.0484647
RPA2	0.0483945
HNRNPR	0.0483626
TSR2	0.0483087
WBP1	0.0483044
ENSSSCG00000017555	0.0482688
SAMD9	0.048183
VDAC3	0.0481578
CCL5	0.048154
NSRP1	0.0480944
ENSSSCG00000026354	0.0480832
TFB2M	0.0480564
ENSSSCG00000013436	0.0480206
SYS1	0.0479656
NCKAP1L	0.0479182
C5orf24	0.04787
CCDC82	0.0478699
RRP15	0.0478397
ALG13	0.0478075
ENSSSCG00000039158	0.0477826
EXOC5	0.047769
ENSSSCG00000023792	0.0477638
APPL1	0.0477296
NARF	0.0477274
SLC35C2	0.0477001
FAM43A	0.0476965
YEATS2	0.0476923
JADE1	0.0476819
MGAT4A	0.0476397
OARD1	0.0476338
TAF13	0.0476041
ALDH4A1	0.0475726
ENSSSCG00000010320	0.0475504
FUS	0.047546
ENSSSCG00000027689	0.0475447
PLEKHA1	0.0475418
INO80E	0.0475283
SPOCK2	0.0475163
RNPS1	0.0475078
ACIN1	0.0474912
CEBPZOS	0.0474826
NAXD	0.0474807
TBL1XR1	0.0474683
METTL27	0.0474392
LONRF3	0.0473808
PKN1	0.0473725
CTSA	0.0473576
SMARCD1	0.0473558
ATP5IF1	0.0472517
UGCG	0.0472318
EIF4EBP1	0.0472197
ENSSSCG00000028677	0.0471988
MAPK1	0.0471684
CD79A	0.0471562
RHOC	0.0471264
MKNK2	0.047116
SEC11A	0.0470658
UBL4A	0.0470592
RCBTB2	0.0470426
MYDGF	0.0470237
ENSSSCG00000015434	0.0470197
RFC4	0.0469556
RRAGC	0.0469075
ENSSSCG00000017146	0.0468392
SERPINB9	0.0468212
FAM98A	0.046801
TMED4	0.0467968
MAK16	0.0467778
CC2D1B	0.046754
CACYBP	0.0467124
BCLAF1	0.0466692
DICER1	0.0465865
ENSSSCG00000027988	0.0465799
ENSSSCG00000036892	0.0465671
STX16	0.0465384
ENSSSCG00000000500	0.0464905
PIAS2	0.0464368
AIMP1	0.0463622
SNRNP25	0.0463474
RNMT	0.0462837
GANAB	0.046266
RFC2	0.0462548
MINPP1	0.0462501
COQ5	0.0462485
POLR2H	0.0462348
HSF1	0.0461859
DYRK1B	0.0461665
BRD1	0.0461657
NCOR1	0.046147
NIPA2	0.0461442
FAM117A	0.0461332
ENSSSCG00000011917	0.0460983
MAP3K1	0.0460797
ENSSSCG00000031288	0.0460625
ENSSSCG00000021427	0.0460596
ATXN7L1	0.0460542
CRTAM	0.0460448
SEMA4D	0.0460376
GATAD2A	0.0460156
YTHDF2	0.0460125
SERTAD1	0.0459883
ENSSSCG00000014343	0.0459776
TRAF5	0.0459393
SLC30A5	0.0459081
ENSSSCG00000012046	0.0458993
ENSSSCG00000007098	0.0458742
NDUFB6	0.0458603
ZFAND2B	0.0458062
SEC13	0.0458005
LRP10	0.0457888
TMOD3	0.0457695
RBBP7	0.0457524
TMEM107	0.0457479
MRPL38	0.0457302
CCDC25	0.0457239
ENSSSCG00000010006	0.0457185
ENSSSCG00000006559	0.0457047
ENSSSCG00000030578	0.0457026
SMPD2	0.0456626
PSMD13	0.0456619
RNF5	0.0456568
IAH1	0.045642
ENSSSCG00000017300	0.045636
POLR2B	0.0456236
TMED9	0.0456197
ANKRD12	0.0456093
ENSSSCG00000033068	0.0456038
ENSSSCG00000039217	0.0456023
ZFAND5	0.0455995
MOBKL3	0.0455957
OGFOD3	0.0455811
HSPA4	0.045575
GTF2E2	0.0455701
HNRNPD	0.0455401
SMIM4	0.0455224
DCTN2	0.0455163
TUT4	0.0455053
INPP4B	0.0454306
SS18	0.0454102
POLR2D	0.045397
ENSSSCG00000013874	0.0453563
BAIAP2L1	0.0453509
DDB2	0.04534
SNW1	0.0453087
NOSIP	0.045307
WTAP	0.0453017
SMIM26	0.0452855
GTF3A	0.045237
GRK2	0.045185
MON1B	0.0451844
ZNRD1	0.0451703
SRA1	0.0451476
P2RY14	0.0451133
MRPL11	0.0451067
EXOSC9	0.0451017
STRN3	0.0450874
USP14	0.0450825
POP4	0.0450817
HM13	0.0450659
MRPS33	0.0450599
ADSS	0.0450322
GTF2F2	0.0449798
BCAP29	0.0449414
TCP1	0.0449358
ENSSSCG00000034469	0.0449147
[truncated: 12,388 more rows]

## Sheet: 6v24_Permutation
Supplementary File 14. Random forest pair-wise analyses of CD2 ɣ𝛿 T-cell cluster. For each model represented below the porcine scRNA-seq cluster IDs compared are shown along with the parameters used and resulting OOB prediction error. Variable importance was assigned by measuring node impurity (Impurity) and using permutations (Permutation). Features that reduced error in predictive accuracy are …
Gene	Permutation
ENSSSCG00000032017	0.0369845
RHEX	0.0245
SRGN	0.0141692
CD2	0.0128818
LCK	0.00894862
TRAT1	0.00820693
ENSSSCG00000014565	0.00782016
ENSSSCG00000013260	0.00489844
TOX	0.00480999
NPY	0.00455774
ENSSSCG00000023584	0.0044267
FCRL6	0.00434914
PLAC8	0.003994
CAMK4	0.0038016
IKZF2	0.00358327
ENSSSCG00000034914	0.00302757
SMC4	0.00283469
EOMES	0.0027622
BLK	0.00274534
CD52	0.00245103
ENSSSCG00000029596	0.00232512
ANXA1	0.00220041
ITGA4	0.00204642
ENSSSCG00000037885	0.00199255
FSCN1	0.00194011
GATA3	0.0018627
CAPG	0.00180593
LAPTM5	0.00178098
SAMSN1	0.00174788
ITM2B	0.00172401
ENSSSCG00000037142	0.00171877
ENSSSCG00000017032	0.00150876
FCER1A	0.00147249
B2M	0.00144124
ENSSSCG00000003042	0.00136126
LGALS1	0.00129381
ENSSSCG00000000635	0.00124575
S100A11	0.00122093
XCL1	0.00121504
NREP	0.00109865
S100A6	0.000990013
KIT	0.000975852
S100A4	0.000962551
STMN3	0.000955651
IL6R	0.000926413
ARHGAP5	0.000917166
ENSSSCG00000003930	0.000906174
ENSSSCG00000012119	0.0009037
SELL	0.000896493
COTL1	0.000889754
ENSSSCG00000026217	0.000856767
IL2RB	0.000854853
ENSSSCG00000039658	0.000838643
JAML	0.00081773
PIK3AP1	0.000807797
PPP1CC	0.000803946
STK17B	0.000704561
STARD4	0.000700608
RPS11	0.000698106
ENSSSCG00000033734	0.000674357
PLEKHF2	0.000664615
RCAN3	0.000630307
ENSSSCG00000040155	0.000615569
PSIP1	0.000614284
CD6	0.000612846
ENSSSCG00000001229	0.000583935
CCR9	0.000580672
HMGN3	0.000561685
ADGRG1	0.000531576
RPS16	0.000530976
ZAP70	0.000487786
ENSSSCG00000013720	0.000460319
ENSSSCG00000033721	0.000460148
MAF	0.000458725
PARK7	0.000454123
SNTB2	0.000453142
CYBRD1	0.000433373
CD74	0.000430618
PTMA	0.000429562
NAPSA	0.000426991
TST	0.000419584
ENSSSCG00000034617	0.000412506
ENSSSCG00000005095	0.0004109
PTPN1	0.000402326
ENSSSCG00000011234	0.000399962
GPX1	0.000393989
RPL39	0.00038993
SLC25A24	0.000381001
ENSSSCG00000037566	0.000361232
S100A10	0.000359249
SGCA	0.000351316
ITGAM	0.000343353
YBX3	0.000339426
FAM49B	0.000336348
PECAM1	0.000333303
UBASH3B	0.000322274
PIK3R1	0.000321661
EMP3	0.000321199
IFT80	0.000319424
STMN1	0.0003181
FADS3	0.000313304
PYCARD	0.000310539
HES1	0.000305369
ENSSSCG00000007435	0.000304145
PHACTR2	0.000296191
PTPN22	0.000295796
SASH3	0.000295711
ENSSSCG00000012166	0.000294378
ARPC1B	0.000290939
EPHB6	0.000286065
ATP6V1G1	0.000284232
ENSSSCG00000008433	0.000279088
CD8A	0.000270175
THEMIS	0.000264948
TFDP2	0.000258354
TPM1	0.000258246
ENSSSCG00000015664	0.000257557
ARHGDIB	0.000252047
MARCKS	0.000251977
SLC11A2	0.000246776
TCF7	0.000240302
TSPO	0.000231814
LPAR6	0.000230698
DGKA	0.00022964
FES	0.000227488
KLF2	0.000222772
ENSSSCG00000003691	0.000222465
CTSD	0.000217319
PDCD1	0.000217009
ENSSSCG00000031088	0.000216615
IL9R	0.000210252
RESF1	0.000203317
ENSSSCG00000022912	0.000202793
TMEM87B	0.000199626
SNX10	0.000199163
RPL23	0.000197542
COX3	0.000195298
ENSSSCG00000033090	0.000195261
GNA15	0.000192973
PKIG	0.000192822
LY6D	0.000190976
KLRK1	0.000190471
FLNB	0.000190031
HPSE	0.000188209
IFI6	0.000182868
ENSSSCG00000031278	0.000182283
MGST1	0.00017899
PTPRC	0.000176704
CD63	0.000175544
EMB	0.00017103
SH3BGRL3	0.000170778
GSN	0.000169423
ZNF683	0.000168882
H3F3B	0.000163486
ENO1	0.000162996
CALM1	0.000160588
LAX1	0.000159423
BIRC3	0.000158152
ETS2	0.000157069
CTSW	0.00015677
CST3	0.000154193
PRKCB	0.000152787
TAGAP	0.000149242
KXD1	0.000147831
FGL2	0.000147095
ENHO	0.00014446
TXNIP	0.000144259
2021-09-11	0.000142926
PVRIG	0.000142835
FYB1	0.000142336
CXXC5	0.000139971
HLA.DRA	0.000139804
ITGB2	0.000139789
RIN3	0.000139774
ENSSSCG00000014855	0.000138961
DDAH2	0.000135071
ELK3	0.000134518
ENSSSCG00000039544	0.000133563
LTB	0.000132423
ENSSSCG00000008032	0.000131205
DGKZ	0.000130378
RPLP2	0.000130273
DAPL1	0.000129866
MISP3	0.000129698
ENSSSCG00000027790	0.000127501
ABLIM1	0.0001269
ENSSSCG00000014569	0.000124944
TIMP1	0.000124095
ENSSSCG00000001341	0.000123949
IPO11	0.000120824
PNRC1	0.000119979
FUT7	0.000119729
TTYH3	0.000119614
PTPN6	0.000118248
ACTG1	0.000117481
ENSSSCG00000034448	0.000117129
ENSSSCG00000036716	0.000114596
VAMP8	0.000112603
HSPB1	0.000112184
HVCN1	0.000109796
LSP1	0.000109312
IKZF3	0.000108832
LYN	0.000106883
FAM89A	0.000106753
TSC22D3	0.000106244
ITM2C	0.000106133
ENSSSCG00000035706	0.000103131
VCL	0.000102367
GSDMD	0.00010207
ENSSSCG00000040529	0.000101835
VIM	0.00010076
ARPP21	0.000100543
BZW1	9.96161e-05
PPP3CA	9.95875e-05
ENSSSCG00000027826	9.93515e-05
ETS1	9.88438e-05
S100A1	9.80356e-05
ENSSSCG00000017509	9.80039e-05
RPL10	9.75969e-05
TNFSF14	9.73929e-05
DCK	9.71494e-05
BAG2	9.64997e-05
BTG1	9.61662e-05
ENSSSCG00000006376	9.59561e-05
NCK1	9.56705e-05
ISG15	9.2418e-05
ZNHIT1	9.22774e-05
ENSSSCG00000039581	9.16106e-05
SSR4	9.12137e-05
GABARAPL2	9.05486e-05
ENSSSCG00000003236	9.03325e-05
GPR183	8.83718e-05
B4GALT1	8.81957e-05
ENSSSCG00000037475	8.76447e-05
ENSSSCG00000005453	8.71472e-05
ENSSSCG00000038507	8.62486e-05
CD247	8.59648e-05
ENSSSCG00000035520	8.59501e-05
IL10RA	8.58873e-05
EVL	8.58372e-05
TPT1	8.46023e-05
CD1D	8.44e-05
ENSSSCG00000011329	8.43411e-05
LRRC42	8.30428e-05
PABPN1	8.2842e-05
CCDC69	8.21309e-05
CASS4	8.09601e-05
RHOH	8.09041e-05
ENSSSCG00000036618	8.08026e-05
FGR	8.01584e-05
GYPC	7.95232e-05
PDGFB	7.94655e-05
REV1	7.88925e-05
TSC22D4	7.84997e-05
ENSSSCG00000037595	7.83071e-05
IL18R1	7.83051e-05
CYTB	7.77804e-05
RPS13	7.73355e-05
COQ8B	7.73322e-05
PPP2R5C	7.72706e-05
SNX18	7.71182e-05
ENSSSCG00000001455	7.68825e-05
ASB9	7.53564e-05
SYTL3	7.53113e-05
ARF6	7.52518e-05
MAP4K4	7.48196e-05
IL21R	7.47384e-05
MYB	7.41789e-05
ENSSSCG00000004970	7.39504e-05
BCAS4	7.25304e-05
H2AFV	7.20593e-05
RPIA	7.19011e-05
RPL11	7.1839e-05
MATK	7.17257e-05
REL	7.14977e-05
BZW2	7.09601e-05
CRLF3	7.0934e-05
ENSSSCG00000009303	7.03076e-05
CBLB	6.95e-05
ABR	6.93699e-05
ENSSSCG00000036013	6.84205e-05
SAMHD1	6.80217e-05
DHRS3	6.79394e-05
DYNLT3	6.76894e-05
HSP90AB1	6.63472e-05
CCSAP	6.54733e-05
PHGDH	6.52232e-05
TIAM1	6.50488e-05
CIRBP	6.3452e-05
JARID2	6.25399e-05
ATF4	6.21957e-05
PTPN12	6.17175e-05
UBAC2	6.15058e-05
CNP	6.04081e-05
FAM49A	6.02286e-05
BAZ2B	6.0082e-05
IRF7	5.9356e-05
IFIT1	5.91512e-05
ETNK2	5.91042e-05
RPS18	5.8591e-05
NFKBIA	5.84925e-05
PCOLCE	5.78264e-05
ENSSSCG00000030197	5.76538e-05
ENSSSCG00000035080	5.75229e-05
ENSSSCG00000033733	5.74669e-05
NPB	5.65755e-05
SPCS3	5.64851e-05
UBB	5.64413e-05
2021-09-06	5.61299e-05
MPZL3	5.60766e-05
RPS14	5.60701e-05
SYT8	5.57063e-05
OCIAD1	5.51365e-05
JUP	5.50233e-05
VAV1	5.50076e-05
PKM	5.38164e-05
ENSSSCG00000037030	5.3295e-05
SPG21	5.31318e-05
ENSSSCG00000040294	5.30898e-05
EXOC1	5.29894e-05
AHR	5.29531e-05
HSPE1	5.28036e-05
RNASEH2B	5.26487e-05
ENSSSCG00000040857	5.24069e-05
SLC1A4	5.23587e-05
CTNNBIP1	5.23404e-05
MIF	5.22881e-05
CYTH4	5.22524e-05
ENSSSCG00000001063	5.08739e-05
STK38	5.05509e-05
CCR7	5.01208e-05
ENSSSCG00000002550	5.00268e-05
SMARCA2	4.99899e-05
TMEM173	4.98159e-05
GLIPR2	4.97745e-05
NPM1	4.97665e-05
PRDX5	4.97439e-05
ENSSSCG00000016737	4.9443e-05
GMPR	4.88765e-05
CST7	4.87231e-05
NDFIP1	4.78048e-05
ENSSSCG00000039731	4.70172e-05
OTULINL	4.7011e-05
SMARCA4	4.69925e-05
S1PR1	4.69023e-05
SERPINF1	4.68508e-05
ACAT1	4.67343e-05
FNBP4	4.66475e-05
ENSSSCG00000025928	4.66375e-05
ENSSSCG00000006418	4.65886e-05
CD99	4.65055e-05
ENSSSCG00000033019	4.64946e-05
CDC42EP3	4.64942e-05
GZMM	4.62976e-05
YWHAQ	4.61636e-05
HBB	4.61331e-05
SCAPER	4.6071e-05
ND4	4.58601e-05
GPR18	4.582e-05
ENSSSCG00000005481	4.55115e-05
MRPL57	4.55006e-05
ASAP1	4.54339e-05
PDCD4	4.51265e-05
RPL34	4.46508e-05
ENSSSCG00000006919	4.41971e-05
LNPEP	4.41776e-05
BRD4	4.404e-05
COX2	4.40124e-05
IFNAR1	4.39198e-05
KAT6B	4.36751e-05
ENSSSCG00000017239	4.36625e-05
HSP90AA1	4.35741e-05
ENSSSCG00000000657	4.31587e-05
EEF1AKMT1	4.29894e-05
PRKD3	4.29449e-05
CD28	4.28906e-05
NDUFS5	4.28771e-05
TXK	4.27871e-05
TOMM7	4.26249e-05
GSTO1	4.22859e-05
KRTCAP2	4.13309e-05
ENSSSCG00000009926	4.08346e-05
ARHGAP25	4.081e-05
SERBP1	4.07385e-05
TAF13	4.04455e-05
ENSSSCG00000027565	4.03562e-05
RPS17	4.02927e-05
ENSSSCG00000032591	4.01619e-05
MRPS25	4.01556e-05
IQGAP1	4.00509e-05
DCXR	4.00289e-05
ENSSSCG00000008576	3.99495e-05
CAT	3.96653e-05
PTPN18	3.96653e-05
ENSSSCG00000036296	3.95143e-05
TRIM44	3.93897e-05
SUMO2	3.93135e-05
KRAS	3.85074e-05
ENSSSCG00000000071	3.8034e-05
DDX21	3.79451e-05
ANKRD10	3.79341e-05
ENSSSCG00000006081	3.77432e-05
RPL35	3.76783e-05
POLR2F	3.76178e-05
ASPSCR1	3.75915e-05
RPL6	3.75729e-05
CMIP	3.74997e-05
RUNX1	3.74919e-05
APPL2	3.74663e-05
LDHD	3.74166e-05
C1orf21	3.73897e-05
CD53	3.73214e-05
GABARAP	3.72878e-05
VPS4B	3.71925e-05
ADSL	3.69746e-05
NKX3.1	3.69539e-05
EEF2	3.69372e-05
RPS15	3.68656e-05
HIF1A	3.67908e-05
FCGRT	3.67778e-05
ENSSSCG00000032003	3.67074e-05
ENSSSCG00000002907	3.664e-05
SPRED2	3.66202e-05
ENSSSCG00000000905	3.6619e-05
CEP170	3.65654e-05
RNF146	3.64361e-05
LIMD2	3.46444e-05
CD3G	3.44262e-05
CD5	3.43991e-05
GMFG	3.43781e-05
CHIC2	3.43735e-05
XBP1	3.43581e-05
ARRB2	3.43306e-05
CTU2	3.43256e-05
MX2	3.42459e-05
ISCU	3.42334e-05
ENSSSCG00000039046	3.42333e-05
CDK2AP2	3.42255e-05
RAN	3.41609e-05
CAPZA1	3.41123e-05
TPR	3.40735e-05
TBCA	3.40517e-05
IGFBP2	3.40479e-05
STRBP	3.40445e-05
ENSSSCG00000016263	3.39873e-05
TUBA1B	3.39534e-05
DUSP1	3.39461e-05
TRAPPC5	3.39442e-05
ENSSSCG00000014031	3.39227e-05
RUNDC3A	3.39155e-05
C11orf58	3.38455e-05
RASA1	3.36318e-05
NDUFS8	3.35922e-05
ID3	3.35233e-05
RPL3	3.33923e-05
ENSSSCG00000015390	3.33803e-05
ACSS3	3.33441e-05
CALCOCO2	3.32883e-05
ARFGAP3	3.31438e-05
MAX	3.22252e-05
COX7A2L	3.21745e-05
FKBP3	3.19182e-05
ENSSSCG00000011952	3.18277e-05
SNRPD1	3.17343e-05
BUD31	3.1636e-05
EIF4B	3.16088e-05
YWHAH	3.14329e-05
MFNG	3.13365e-05
TMA7	3.13346e-05
H2AFY	3.12783e-05
SRI	3.12744e-05
SH3GLB1	3.12642e-05
MBNL3	3.12349e-05
RUSC1	3.10838e-05
MYL6	3.09953e-05
LGALS3BP	3.09141e-05
NONO	3.08524e-05
SUCLG1	3.085e-05
ENSSSCG00000006363	3.07887e-05
SCARB2	3.07689e-05
TGFBR3	3.07605e-05
ENSSSCG00000035538	3.07493e-05
RTF1	3.07226e-05
ARGLU1	3.0718e-05
ITGA2B	3.05871e-05
HMGB2	3.0544e-05
SMAD2	3.05291e-05
PLEK	3.05214e-05
ARPC2	3.03467e-05
ND3	3.0229e-05
MRPS9	3.00859e-05
CHD3	2.99201e-05
RASGRP1	2.88779e-05
PRELID1	2.88323e-05
SPEN	2.87548e-05
NSD3	2.85232e-05
PBRM1	2.8462e-05
MRPS18B	2.83659e-05
EIF1	2.832e-05
ENSSSCG00000009633	2.83147e-05
CGGBP1	2.82479e-05
FAM32A	2.82244e-05
PDE4B	2.8211e-05
ARL4C	2.81964e-05
ENSSSCG00000039706	2.8126e-05
ENSSSCG00000039217	2.80855e-05
ENSSSCG00000000576	2.80143e-05
TNFSF10	2.80136e-05
ENSSSCG00000026719	2.79694e-05
CHRAC1	2.79388e-05
TAF1D	2.79386e-05
EIF2B5	2.79128e-05
MAN1C1	2.7874e-05
ENSSSCG00000000640	2.78565e-05
ENSSSCG00000034190	2.7779e-05
GPR171	2.77731e-05
GNG2	2.77668e-05
SNU13	2.77554e-05
RASL10B	2.77527e-05
EDF1	2.77521e-05
AGTRAP	2.77391e-05
WDR5	2.77359e-05
SPON2	2.76816e-05
ATP5PO	2.76734e-05
ENSSSCG00000024973	2.76004e-05
ENSSSCG00000001927	2.75983e-05
SHISA5	2.75589e-05
BPI	2.7553e-05
MRPL24	2.75146e-05
ENSSSCG00000032073	2.75134e-05
ACIN1	2.75034e-05
ENSSSCG00000025060	2.75023e-05
UFM1	2.74899e-05
RPLP0	2.74881e-05
NEIL2	2.74166e-05
TNFAIP8	2.7394e-05
PSMA7	2.73528e-05
MVB12B	2.72883e-05
RAB23	2.70105e-05
ENSSSCG00000037775	2.59751e-05
UBALD2	2.56553e-05
ENSSSCG00000004446	2.56031e-05
ENSSSCG00000013661	2.55468e-05
ATG12	2.54162e-05
BTF3	2.53855e-05
SKP1	2.53586e-05
EMILIN2	2.52891e-05
ESF1	2.52786e-05
ENSSSCG00000039635	2.52765e-05
BCLAF1	2.52693e-05
ADGRE5	2.52476e-05
CREM	2.51969e-05
PABPC1	2.51105e-05
STRADB	2.50905e-05
CUEDC2	2.50666e-05
SDHB	2.50656e-05
UQCR10	2.5029e-05
EIF4H	2.49954e-05
TM2D1	2.49904e-05
ENSSSCG00000039158	2.49904e-05
GMFB	2.49883e-05
UCP2	2.49629e-05
RAB10	2.49608e-05
RAB2A	2.49485e-05
TAX1BP1	2.49292e-05
ST3GAL6	2.48646e-05
THOC7	2.48607e-05
SCNM1	2.47877e-05
CLINT1	2.4769e-05
CSNK1G3	2.47468e-05
SRSF2	2.4742e-05
SNX2	2.47401e-05
OTULIN	2.47266e-05
POLE4	2.47199e-05
ENSSSCG00000040273	2.46845e-05
TCP1	2.46844e-05
GUK1	2.46703e-05
NOC4L	2.46637e-05
UHRF1BP1L	2.46163e-05
CD44	2.4597e-05
ENSSSCG00000034019	2.45926e-05
HERC6	2.45898e-05
NOP53	2.45496e-05
RPS21	2.45414e-05
PSMA4	2.45252e-05
ENSSSCG00000006665	2.45022e-05
ENSSSCG00000024588	2.44602e-05
MAP2K2	2.44096e-05
ARL6IP1	2.44063e-05
CCDC34	2.43902e-05
ENSSSCG00000016475	2.43828e-05
PDK1	2.43088e-05
PSTPIP1	2.42776e-05
RPS23	2.42368e-05
LONRF3	2.41723e-05
TMEM154	2.41302e-05
ENSSSCG00000012811	2.40222e-05
RPL27	2.39498e-05
DNM1L	2.37974e-05
CXCR4	2.35353e-05
PRKACB	2.33157e-05
TNFAIP3	2.29411e-05
RPS4X	2.24584e-05
LBR	2.23219e-05
CACYBP	2.23102e-05
NAXE	2.22846e-05
ENSSSCG00000008898	2.22808e-05
ERP29	2.22677e-05
DUSP6	2.22576e-05
RAP1B	2.22193e-05
ENSSSCG00000009293	2.21932e-05
RASGRP2	2.21084e-05
STOML2	2.21053e-05
ENSSSCG00000028479	2.20353e-05
CCDC9	2.20241e-05
CYB5A	2.19973e-05
UGCG	2.1965e-05
NBEAL2	2.19379e-05
APBB1IP	2.18869e-05
RBL2	2.18436e-05
RPS6	2.18342e-05
CSK	2.18183e-05
PSMB8	2.18028e-05
ARRB1	2.17851e-05
NOP10	2.17569e-05
SLC35A4	2.17505e-05
MRPL18	2.17421e-05
ENSSSCG00000034802	2.17322e-05
ATP5F1D	2.16976e-05
ENSSSCG00000012916	2.16742e-05
CAP1	2.16387e-05
GCSAML	2.16307e-05
FAM171B	2.16277e-05
SEMA4D	2.16249e-05
MNDA	2.15924e-05
ENSSSCG00000037054	2.15812e-05
CTSB	2.15388e-05
ZC3H12D	2.15326e-05
ENSSSCG00000004666	2.15109e-05
BCAS3	2.14917e-05
IDH3B	2.14833e-05
SELENOF	2.14579e-05
ENSSSCG00000039460	2.14037e-05
SSB	2.14003e-05
ENSSSCG00000034709	2.13816e-05
HINT1	2.13789e-05
TRAPPC6A	2.13744e-05
ENSSSCG00000034072	2.13671e-05
RAD23A	2.13417e-05
SSR1	2.12781e-05
CERS6	2.12778e-05
CEBPB	2.12523e-05
LEPROTL1	2.11995e-05
ENSSSCG00000015710	2.11897e-05
PLCL2	2.11865e-05
CORO1A	2.11526e-05
SPTAN1	2.11259e-05
EPSTI1	2.10258e-05
CD226	2.10176e-05
RPL9	2.06823e-05
ENSSSCG00000000097	1.95949e-05
EML4	1.95442e-05
SLC35C2	1.9388e-05
CD320	1.9313e-05
ENSSSCG00000004963	1.92626e-05
RAB1A	1.92317e-05
TRDC	1.91839e-05
TRPV5	1.90968e-05
ENSSSCG00000013315	1.90705e-05
RALY	1.90564e-05
TMEM9B	1.90552e-05
HSD17B10	1.90507e-05
TPM2	1.90332e-05
ENSSSCG00000001010	1.8997e-05
RSL24D1	1.89834e-05
SH2D2A	1.89795e-05
MAP11	1.89726e-05
SREBF2	1.89296e-05
PLIN3	1.89063e-05
ELMO1	1.88935e-05
RNF2	1.88887e-05
ARID2	1.88876e-05
ENSSSCG00000001979	1.88748e-05
RBM42	1.88694e-05
PARM1	1.88678e-05
PLGRKT	1.88587e-05
2021-09-09	1.88562e-05
MRRF	1.88286e-05
CDIPT	1.88283e-05
UBXN11	1.88277e-05
EIF3E	1.8791e-05
PLEKHO1	1.87867e-05
IK	1.87712e-05
SRSF10	1.87698e-05
COX5A	1.87628e-05
NEK7	1.87508e-05
SESN1	1.87478e-05
CD37	1.87425e-05
PNN	1.87326e-05
CD200	1.87255e-05
INO80C	1.87181e-05
ENSSSCG00000017300	1.87123e-05
SHKBP1	1.87089e-05
TAF7	1.86872e-05
CMTM8	1.86772e-05
PPP2R5E	1.8677e-05
HBS1L	1.86756e-05
NDFIP2	1.86631e-05
POLR2C	1.86501e-05
DYNLL1	1.86485e-05
ENSSSCG00000038359	1.86437e-05
ENSSSCG00000006156	1.86421e-05
ZC3H7B	1.8639e-05
ENSSSCG00000039618	1.86388e-05
ENSSSCG00000005480	1.86329e-05
CCR4	1.86322e-05
CAPN7	1.86283e-05
ENSSSCG00000009338	1.8626e-05
MEF2A	1.86259e-05
TAOK3	1.85864e-05
TRIB2	1.85479e-05
MED21	1.85297e-05
ENSSSCG00000027491	1.85149e-05
LIG3	1.85076e-05
B3GLCT	1.85056e-05
PNKP	1.85001e-05
ARL2BP	1.84949e-05
ENSSSCG00000016711	1.84829e-05
ATM	1.84749e-05
CITED2	1.84711e-05
KHDRBS1	1.84702e-05
ZC3HAV1	1.84601e-05
ENSSSCG00000027085	1.84402e-05
RHBDL2	1.84387e-05
TIMM10	1.84263e-05
NKAP	1.84247e-05
TMEM160	1.84201e-05
UBE2R2	1.84052e-05
MYO1F	1.84029e-05
CTCF	1.83891e-05
LIX1	1.83815e-05
NUCKS1	1.83746e-05
RBBP4	1.83693e-05
ENSSSCG00000010203	1.8339e-05
BECN1	1.83311e-05
RCBTB2	1.83206e-05
OSGEPL1	1.83069e-05
PFDN1	1.82711e-05
ENSSSCG00000040248	1.82692e-05
H3F3A	1.8268e-05
EHD1	1.82398e-05
WBP1L	1.82171e-05
M6PR	1.81883e-05
UXS1	1.81372e-05
PTBP3	1.81035e-05
RACK1	1.81025e-05
ENSSSCG00000035955	1.80919e-05
PDIA6	1.80778e-05
ST6GAL1	1.80484e-05
CCDC150	1.79978e-05
ENSSSCG00000013992	1.79638e-05
RPL10A	1.79376e-05
YPEL3	1.79216e-05
CYTIP	1.78963e-05
ATP5F1A	1.78226e-05
ARL5A	1.77917e-05
DAZAP2	1.77884e-05
ENSSSCG00000038711	1.64304e-05
RPS20	1.64177e-05
SLC37A3	1.62581e-05
ENSSSCG00000007743	1.61886e-05
TP53RK	1.61763e-05
BAZ1B	1.61715e-05
ENSSSCG00000017749	1.61551e-05
TMEM258	1.61411e-05
KLF13	1.6045e-05
TMEM9	1.60297e-05
TRAPPC2L	1.60292e-05
RANBP1	1.59816e-05
RIPK3	1.5949e-05
ITGA1	1.59445e-05
CHID1	1.59302e-05
ECHS1	1.59289e-05
MOV10	1.59204e-05
ARPC5	1.59165e-05
POLR2E	1.59103e-05
CTSS	1.59058e-05
NUDT5	1.58983e-05
EBAG9	1.58968e-05
RBM26	1.58894e-05
CD3E	1.58794e-05
SSR3	1.58505e-05
ZNF618	1.58104e-05
HIST1H1E	1.58098e-05
ENSSSCG00000035908	1.58062e-05
RNF40	1.57991e-05
NDUFA13	1.5795e-05
PRPF4B	1.57851e-05
CNN2	1.57624e-05
SOS1	1.57569e-05
ENSSSCG00000008440	1.5748e-05
NUP93	1.57397e-05
ARPC3	1.57366e-05
OTUB1	1.57317e-05
TMEM50A	1.57313e-05
ENSSSCG00000017146	1.57233e-05
TRAPPC11	1.57213e-05
TNFSF11	1.57159e-05
UTP6	1.57062e-05
ENSSSCG00000034469	1.57036e-05
ENSSSCG00000028633	1.56986e-05
NDUFB8	1.5698e-05
PSMD11	1.56937e-05
ENSSSCG00000031580	1.56888e-05
CFL1	1.56888e-05
C21orf91	1.56868e-05
ENSSSCG00000026064	1.56845e-05
SEC11A	1.566e-05
B3GNT2	1.56594e-05
EEFSEC	1.56537e-05
ENSSSCG00000031773	1.56524e-05
LHPP	1.56495e-05
CD79A	1.56438e-05
THAP5	1.56368e-05
MAP4K2	1.56351e-05
BPHL	1.56299e-05
DDB2	1.56262e-05
ENSSSCG00000011917	1.56204e-05
GEMIN7	1.56133e-05
BCKDHB	1.56087e-05
RBMS2	1.56027e-05
ENSSSCG00000011506	1.55982e-05
TMOD3	1.55955e-05
ENSSSCG00000021591	1.55909e-05
STIP1	1.55889e-05
EHBP1	1.55888e-05
HTATIP2	1.55757e-05
SRRM1	1.55748e-05
SERTAD3	1.55664e-05
ITPRID2	1.55561e-05
OGFOD3	1.55535e-05
ENSSSCG00000010674	1.5547e-05
KIAA2026	1.55457e-05
BLZF1	1.55441e-05
PARS2	1.55425e-05
RAB4A	1.55345e-05
PEX13	1.55331e-05
PTGER2	1.55324e-05
ANXA7	1.55289e-05
CCND2	1.5521e-05
ENSSSCG00000017868	1.55203e-05
TOR4A	1.55195e-05
SEC22B	1.5519e-05
ENSSSCG00000004489	1.55189e-05
LCP1	1.55172e-05
RSRC2	1.55093e-05
LIX1L	1.55091e-05
FMNL1	1.55069e-05
PBXIP1	1.55012e-05
ZHX1	1.54785e-05
MORF4L1	1.54686e-05
MX1	1.54647e-05
ENSSSCG00000022906	1.54628e-05
RNPEP	1.54612e-05
TP53INP1	1.5456e-05
CNPY3	1.54517e-05
RNF44	1.54506e-05
RAP2B	1.54448e-05
COPS5	1.54425e-05
FDFT1	1.54352e-05
LMAN1	1.54348e-05
NKG7	1.54345e-05
RUFY1	1.54248e-05
BET1L	1.54194e-05
RPS3A	1.54178e-05
FTL	1.54163e-05
THRAP3	1.54131e-05
FUS	1.54086e-05
OTOS	1.53981e-05
CCDC80	1.53942e-05
TRIM32	1.53926e-05
MRPL12	1.53904e-05
SLC39A10	1.53846e-05
KLHL26	1.53784e-05
ENSSSCG00000003914	1.53747e-05
ZBTB48	1.53648e-05
NUDT3	1.5361e-05
RIC8B	1.53593e-05
DDX39A	1.53582e-05
MRPL21	1.53557e-05
RGS19	1.53494e-05
PHF5A	1.53375e-05
IRGQ	1.53374e-05
CNOT4	1.53289e-05
PCMT1	1.53275e-05
HIST1H2AG	1.53096e-05
EVI2B	1.53046e-05
PRDX4	1.53021e-05
TRAF5	1.52725e-05
DBNL	1.52691e-05
NDUFS7	1.52648e-05
TNRC6B	1.52607e-05
TLN1	1.525e-05
RPUSD1	1.52498e-05
CLK1	1.52451e-05
RBPMS	1.52442e-05
NCSTN	1.52439e-05
EMC6	1.52423e-05
CRTAM	1.52407e-05
ARL6IP5	1.52323e-05
PELI1	1.52285e-05
HMGN4	1.52216e-05
IWS1	1.52078e-05
ENSSSCG00000035611	1.52057e-05
PSMD2	1.52024e-05
ORC4	1.51893e-05
ENSSSCG00000028035	1.5184e-05
LRRC70	1.51828e-05
PTPRE	1.51701e-05
KIF2A	1.51662e-05
ENSSSCG00000038403	1.51533e-05
DHX29	1.51329e-05
ATXN7L1	1.51291e-05
JADE1	1.51196e-05
SIPA1	1.5104e-05
CNBP	1.50874e-05
NEDD9	1.50864e-05
YIPF3	1.50716e-05
TMC6	1.50643e-05
MRPS23	1.50599e-05
RSRP1	1.50357e-05
ARPC5L	1.50208e-05
EIF3K	1.50164e-05
H2AFZ	1.49925e-05
PPP1R18	1.49351e-05
GAPDH	1.49313e-05
ENSSSCG00000024486	1.48838e-05
MGST3	1.484e-05
CIAO2A	1.47929e-05
PTPN7	1.46214e-05
ATP2A2	1.45626e-05
HCST	1.4481e-05
ORAI3	1.34309e-05
ENSSSCG00000038825	1.3057e-05
TMTC3	1.29997e-05
ATP5ME	1.2933e-05
ENSSSCG00000036114	1.29153e-05
KLHDC4	1.2913e-05
ENSSSCG00000009625	1.28798e-05
COX8A	1.28527e-05
PFN1	1.28462e-05
MAP2K4	1.28e-05
LEF1	1.27968e-05
NTAN1	1.27967e-05
ENSSSCG00000024974	1.27936e-05
TRNT1	1.27796e-05
TET2	1.27692e-05
SSR2	1.27685e-05
ATP8	1.27592e-05
RFXANK	1.27252e-05
BSDC1	1.27188e-05
PHF20	1.27104e-05
BBS7	1.27038e-05
ENSSSCG00000010301	1.27038e-05
ZMAT3	1.27035e-05
CD2BP2	1.26984e-05
METTL23	1.26984e-05
RHOT1	1.26836e-05
DIMT1	1.26805e-05
SRA1	1.26798e-05
REEP5	1.26795e-05
PTBP1	1.26768e-05
WDR26	1.26735e-05
MSH6	1.26722e-05
CKAP5	1.26642e-05
SLU7	1.26616e-05
ATE1	1.26595e-05
ABCC5	1.26558e-05
SPCS1	1.2654e-05
RASSF2	1.26472e-05
ENSSSCG00000010734	1.26453e-05
INVS	1.2644e-05
ELP5	1.26417e-05
TRIP12	1.26396e-05
HADHA	1.26382e-05
TMEM189	1.26342e-05
COPS3	1.26334e-05
ENSSSCG00000032556	1.26324e-05
ZCWPW1	1.26285e-05
ZNRF2	1.26246e-05
ZNF462	1.26183e-05
RAB24	1.26148e-05
SACM1L	1.26053e-05
SCAF8	1.26015e-05
TTC3	1.26e-05
SLC9A3R1	1.25996e-05
PDCD6	1.25993e-05
ENSSSCG00000031152	1.25992e-05
COMMD5	1.25968e-05
NDUFB4	1.25894e-05
UBR2	1.25868e-05
MIOS	1.25811e-05
ENSSSCG00000014672	1.25786e-05
MGAT4A	1.25783e-05
CMPK2	1.25701e-05
MRPL47	1.25687e-05
IRF2	1.25637e-05
ASCC1	1.2562e-05
ENSSSCG00000037187	1.25614e-05
TRAPPC6B	1.25524e-05
NSMCE1	1.25507e-05
ENSSSCG00000005518	1.25489e-05
PSMC4	1.25448e-05
UBE2G2	1.25392e-05
SUSD6	1.25392e-05
CCDC115	1.25392e-05
LAMTOR5	1.25223e-05
DNAJB1	1.25219e-05
GSE1	1.25212e-05
TFB2M	1.25198e-05
PCM1	1.25174e-05
ENSSSCG00000004547	1.25147e-05
PCNA	1.25074e-05
SLC22A17	1.25056e-05
TXNRD2	1.2505e-05
MRPS18C	1.25026e-05
CENPH	1.2501e-05
FRMD8	1.25e-05
EFNA2	1.25e-05
GCSAM	1.24973e-05
LZTS1	1.24967e-05
ZNF217	1.24963e-05
RNF10	1.24915e-05
SP110	1.24903e-05
ENSSSCG00000002351	1.24854e-05
FLNA	1.24838e-05
PIH1D1	1.2481e-05
NAMPT	1.24805e-05
DHX58	1.24773e-05
SPATA5	1.24758e-05
HELZ	1.24717e-05
EIF3D	1.24697e-05
WDR7	1.24633e-05
UBE2V1	1.24619e-05
CEP295	1.24613e-05
MICOS10	1.2459e-05
ARIH1	1.24565e-05
PHF3	1.24556e-05
ENSSSCG00000026354	1.24517e-05
LYSMD3	1.24503e-05
DNAJB14	1.24497e-05
STK39	1.24474e-05
WAS	1.24466e-05
YARS	1.24432e-05
FAM98A	1.24427e-05
PFN2	1.24417e-05
TARS2	1.24417e-05
TRPC3	1.24417e-05
STXBP2	1.24362e-05
UBAP2	1.24279e-05
DRG1	1.24234e-05
ZNF655	1.24224e-05
NBR1	1.2417e-05
MRPL54	1.24127e-05
AP3M1	1.24105e-05
MTA2	1.24099e-05
EXOC6	1.24089e-05
ATAD5	1.24082e-05
DDX3X	1.24081e-05
ITGB7	1.24071e-05
TNNI2	1.24049e-05
ND5	1.23988e-05
ALAS1	1.23962e-05
2021-03-02	1.23959e-05
COX6A2	1.23939e-05
EIF4A2	1.23938e-05
SLC25A3	1.23886e-05
TUT7	1.23869e-05
STX8	1.23866e-05
USP1	1.23853e-05
USP7	1.23839e-05
PRXL2B	1.23837e-05
NOL11	1.2382e-05
EXOSC4	1.23791e-05
LIPA	1.23771e-05
ENSSSCG00000010158	1.23733e-05
PLEKHF1	1.2372e-05
DYRK2	1.23716e-05
PARP11	1.23706e-05
ZBTB44	1.23701e-05
SCAP	1.237e-05
CD48	1.23692e-05
SOX4	1.23677e-05
SEMA7A	1.23614e-05
GNAI3	1.23601e-05
GPSM3	1.2359e-05
SHARPIN	1.23554e-05
ENSSSCG00000026446	1.23522e-05
LAT2	1.23397e-05
FH	1.23388e-05
NRROS	1.23381e-05
EIF2A	1.23283e-05
MAT2A	1.23232e-05
ENSSSCG00000010685	1.23202e-05
SAMD9	1.23201e-05
ENSSSCG00000016376	1.23188e-05
CARHSP1	1.23172e-05
TIMMDC1	1.23172e-05
RRAGC	1.23148e-05
ENSSSCG00000000405	1.23124e-05
EXOC5	1.23077e-05
ARHGAP30	1.2297e-05
ENSSSCG00000033987	1.22917e-05
MRPL45	1.22804e-05
NUP54	1.22788e-05
HDAC1	1.2278e-05
UGP2	1.22773e-05
CDK10	1.22745e-05
TIMM21	1.22715e-05
RBM4	1.22714e-05
RNPS1	1.22671e-05
PRKAR2B	1.2264e-05
EIF1AX	1.22561e-05
CRBN	1.22554e-05
PSMB1	1.22534e-05
RPS19BP1	1.22513e-05
MMP25	1.22409e-05
ENSSSCG00000039612	1.22364e-05
LMF1	1.2233e-05
FGGY	1.22324e-05
KIF5B	1.22269e-05
FBXO30	1.22172e-05
TXNDC5	1.22137e-05
TNIK	1.22103e-05
CCL5	1.22084e-05
FBXO39	1.22019e-05
PHIP	1.21966e-05
CCDC124	1.21908e-05
BRK1	1.21873e-05
MTHFR	1.21867e-05
NDUFB2	1.21859e-05
EMG1	1.21827e-05
DONSON	1.21825e-05
ZDHHC24	1.21786e-05
PGM2	1.2171e-05
ARL8A	1.21611e-05
PDIA4	1.21581e-05
ENSSSCG00000017165	1.21448e-05
MTA1	1.21332e-05
COX1	1.21331e-05
EMD	1.2128e-05
COMMD4	1.21266e-05
LCN2	1.21091e-05
PARVG	1.21069e-05
RAP2A	1.20974e-05
OSBPL8	1.20925e-05
C12orf10	1.20924e-05
GUCD1	1.20664e-05
ENSSSCG00000010056	1.20604e-05
ENSSSCG00000010519	1.20482e-05
F3	1.20482e-05
KIAA0930	1.20467e-05
ZNF239	1.20448e-05
DUSP7	1.20301e-05
ETFB	1.20171e-05
STAT5B	1.1976e-05
MYO1G	1.19736e-05
TBRG4	1.19586e-05
GPR55	1.19581e-05
DUSP5	1.19543e-05
RPRD1A	1.19073e-05
METTL27	1.18401e-05
PLP2	1.18023e-05
SDCBP	1.0299e-05
CFDP1	1.01216e-05
NUDC	9.88518e-06
ACOT13	9.83875e-06
EAPP	9.74026e-06
MYNN	9.73854e-06
PALM2	9.73703e-06
CBFB	9.73158e-06
AKAP8L	9.71331e-06
MRPL17	9.70292e-06
ENSSSCG00000000365	9.68155e-06
RIOX1	9.67861e-06
PRRC2A	9.67742e-06
RAP1GAP2	9.67742e-06
ATF6	9.67742e-06
NEIL1	9.67553e-06
CAST	9.67512e-06
ENSSSCG00000014850	9.66279e-06
ENSSSCG00000031117	9.66184e-06
PSMA6	9.65365e-06
NANS	9.63328e-06
GSR	9.63192e-06
CCT7	9.61272e-06
RCSD1	9.61135e-06
ENSSSCG00000011676	9.60329e-06
NOP56	9.60222e-06
BATF	9.59627e-06
CCT4	9.59255e-06
P2RY14	9.5892e-06
BAP1	9.58624e-06
SLC37A1	9.58466e-06
TLE4	9.58169e-06
USF1	9.57487e-06
SCG5	9.57283e-06
TAZ	9.56984e-06
ATG4A	9.56938e-06
ND6	9.56938e-06
MED6	9.56508e-06
ABLIM3	9.54465e-06
SLC25A17	9.54401e-06
IDH2	9.53946e-06
HEBP1	9.53895e-06
TTC9B	9.53895e-06
RXRB	9.53526e-06
ENSSSCG00000027974	9.53392e-06
KDELR2	9.53231e-06
ESCO1	9.52381e-06
SPSB3	9.52381e-06
IKZF1	9.52302e-06
ATG5	9.52125e-06
AHCYL1	9.52012e-06
TUBB2B	9.51609e-06
SEC31A	9.51547e-06
WSB1	9.51482e-06
HNRNPR	9.51335e-06
USP5	9.51295e-06
MRPL46	9.50872e-06
PSMD3	9.49798e-06
SMU1	9.49624e-06
QPCTL	9.49367e-06
SYNCRIP	9.49339e-06
NPM3	9.48811e-06
SPTBN1	9.48726e-06
PSMB9	9.48248e-06
SETD2	9.47979e-06
ZDHHC14	9.47867e-06
PTPRK	9.47867e-06
INTS7	9.47867e-06
FUCA2	9.47705e-06
ARHGAP9	9.47398e-06
RC3H2	9.46372e-06
POLR2D	9.46372e-06
DUS1L	9.46372e-06
ENSSSCG00000003885	9.45853e-06
ENSSSCG00000008990	9.45386e-06
USP18	9.45385e-06
FAM162A	9.45255e-06
SPIN3	9.45208e-06
RAB28	9.45026e-06
AP1S1	9.44942e-06
KLHDC3	9.44924e-06
SND1	9.44882e-06
CREB1	9.44829e-06
SIT1	9.4469e-06
AKR1A1	9.44529e-06
ENSSSCG00000038708	9.44513e-06
TCEA2	9.44387e-06
TGS1	9.43839e-06
SULT2B1	9.4373e-06
PANK2	9.43563e-06
SSBP1	9.43466e-06
POFUT2	9.43445e-06
ZFP2	9.43396e-06
EVA1B	9.43396e-06
NR2C1	9.43396e-06
TLE3	9.42929e-06
ENSSSCG00000012654	9.42369e-06
RCCD1	9.41915e-06
ZNF768	9.41877e-06
HSD17B8	9.41735e-06
ENSSSCG00000007719	9.41631e-06
CCDC181	9.4145e-06
LCLAT1	9.41412e-06
RPRD2	9.41366e-06
CDK5	9.4103e-06
PPP1R13B	9.40963e-06
KIAA0040	9.40957e-06
PSMB6	9.40481e-06
ENSSSCG00000013453	9.40435e-06
ITK	9.40393e-06
AHI1	9.4035e-06
THOC5	9.40299e-06
SART1	9.40188e-06
CDH24	9.40073e-06
ENSSSCG00000032894	9.40017e-06
ALG5	9.39998e-06
MAP1LC3B	9.3995e-06
NLRC5	9.39947e-06
CWC22	9.39823e-06
ENSSSCG00000003211	9.39641e-06
PSMC1	9.39604e-06
MPHOSPH10	9.39307e-06
CXXC1	9.39258e-06
ENSSSCG00000013836	9.39258e-06
ENSSSCG00000009128	9.39032e-06
LRBA	9.38967e-06
CWF19L1	9.38967e-06
FBXL6	9.38967e-06
PTCD2	9.38967e-06
ENSSSCG00000033918	9.38967e-06
PARP2	9.38684e-06
COX7B	9.38448e-06
HSD11B1L	9.38114e-06
PELO	9.37797e-06
AGO2	9.37679e-06
PRDX6	9.375e-06
CASC3	9.37331e-06
CYCS	9.37317e-06
NUBP2	9.37035e-06
MACO1	9.36485e-06
ENSSSCG00000001414	9.36405e-06
PPP2R3A	9.36401e-06
UQCRC1	9.36352e-06
PIGW	9.36326e-06
ANXA5	9.36235e-06
NASP	9.36111e-06
TBPL1	9.36037e-06
PLCL1	9.36037e-06
FBH1	9.36037e-06
WDR48	9.35864e-06
MPI	9.3578e-06
COPS6	9.35577e-06
DAXX	9.35561e-06
ENSSSCG00000038550	9.35542e-06
SERTAD1	9.3522e-06
ATXN10	9.35162e-06
ENSSSCG00000009239	9.34863e-06
FAM83A	9.34579e-06
MRPL13	9.34579e-06
TWF2	9.34566e-06
CPSF3	9.34552e-06
CISH	9.34506e-06
ENSSSCG00000034223	9.34483e-06
FIP1L1	9.34278e-06
SMARCE1	9.34147e-06
TENT5A	9.34119e-06
PRRC2B	9.33793e-06
ENSSSCG00000023643	9.33609e-06
EIF1B	9.33197e-06
ELP2	9.33126e-06
BCL10	9.32986e-06
SLC9A7	9.32848e-06
ANGPTL1	9.32706e-06
JCHAIN	9.32655e-06
ENSSSCG00000013436	9.32637e-06
HIGD2A	9.32617e-06
KHDC4	9.32518e-06
PREB	9.32453e-06
SCLY	9.32381e-06
TRIM45	9.32247e-06
DNAJC5	9.3224e-06
U2AF2	9.32193e-06
SIRT7	9.31936e-06
GFPT1	9.31735e-06
USP38	9.31695e-06
TMEM106B	9.31677e-06
CACNB3	9.31677e-06
ST7L	9.31677e-06
RAD51B	9.31677e-06
RAB40B	9.31677e-06
ENSSSCG00000034231	9.31656e-06
TP53I13	9.31279e-06
CEP192	9.31278e-06
RFX2	9.3127e-06
FOXN3	9.31219e-06
ITM2A	9.31197e-06
LAMTOR4	9.30985e-06
AGFG2	9.30906e-06
DHX36	9.30759e-06
GHDC	9.30738e-06
RAB27B	9.30515e-06
ENSSSCG00000015337	9.30457e-06
NARS	9.30372e-06
C6orf120	9.30324e-06
ENSSSCG00000012984	9.30233e-06
DNAJB4	9.30233e-06
FAM3A	9.30233e-06
NUB1	9.3019e-06
ENSSSCG00000014267	9.30053e-06
GNPTG	9.30048e-06
DDHD1	9.29868e-06
MSMO1	9.29856e-06
ACLY	9.2985e-06
SEC22A	9.29835e-06
OARD1	9.29823e-06
NELFE	9.2976e-06
PMM1	9.29754e-06
NAXD	9.29677e-06
SMAD4	9.29353e-06
RIC1	9.29322e-06
CDH1	9.28954e-06
SMPD2	9.2895e-06
NME1	9.2893e-06
ARHGAP15	9.28877e-06
SMAP2	9.28834e-06
ELOA	9.28793e-06
NAGPA	9.28793e-06
POGLUT3	9.28793e-06
ERN1	9.28793e-06
MRPL22	9.28781e-06
SLC26A2	9.28374e-06
NCOA4	9.28347e-06
DKC1	9.28316e-06
DPPA5	9.27859e-06
DMAP1	9.27847e-06
RHOQ	9.27825e-06
NFIL3	9.27357e-06
RBL1	9.27357e-06
ALKBH4	9.27339e-06
QTRT2	9.26892e-06
ENSSSCG00000008137	9.26664e-06
CUL5	9.26446e-06
ENSSSCG00000037143	9.26286e-06
ENSSSCG00000035561	9.2593e-06
RBX1	9.25531e-06
HERC5	9.25421e-06
HDAC3	9.25265e-06
GATM	9.25206e-06
RAB7A	9.25128e-06
GTF2B	9.25005e-06
MCC	9.24982e-06
NUCB1	9.24625e-06
GCNT4	9.24618e-06
ENSSSCG00000013874	9.24499e-06
NOL8	9.24499e-06
FNTA	9.24499e-06
MPHOSPH8	9.24382e-06
MED9	9.23953e-06
CBLL1	9.23718e-06
KHSRP	9.23464e-06
ALG13	9.23245e-06
CCDC107	9.23209e-06
ENSSSCG00000021200	9.23147e-06
VRK1	9.23077e-06
A1CF	9.23077e-06
BEX1	9.23077e-06
PARP14	9.23073e-06
ATAD2B	9.22368e-06
GOLGB1	9.22337e-06
PDE3B	9.22272e-06
SYNGR2	9.22183e-06
PPIG	9.22147e-06
NDUFAF8	9.21978e-06
TMEM186	9.21926e-06
ZBTB7A	9.21848e-06
NUDT9	9.21817e-06
GPR174	9.21671e-06
STX12	9.21659e-06
ANAPC5	9.21659e-06
APTX	9.21659e-06
C12orf57	9.2155e-06
SRP14	9.21498e-06
RRAGB	9.21485e-06
CTSC	9.2143e-06
C6orf203	9.2118e-06
DCTN2	9.21099e-06
SRSF11	9.2025e-06
RBMS3	9.20245e-06
SERTAD2	9.20245e-06
ENSSSCG00000007203	9.20003e-06
GNL3L	9.19988e-06
PPP4C	9.19771e-06
FEM1B	9.19313e-06
RIOK3	9.19306e-06
ENSSSCG00000025940	9.19181e-06
MMD	9.1917e-06
HDAC5	9.19077e-06
RBCK1	9.18978e-06
GINS2	9.18836e-06
TBC1D5	9.18836e-06
ZYG11B	9.18836e-06
LRRC28	9.18369e-06
ELOC	9.17905e-06
AKR1B1	9.17739e-06
SLC6A8	9.17538e-06
SCART1	9.17494e-06
ZNF646	9.17448e-06
TMCO3	9.17431e-06
SH2D3C	9.17352e-06
RANBP3	9.17171e-06
FLCN	9.16987e-06
TFCP2	9.16536e-06
MAP7D1	9.16521e-06
CCS	9.16219e-06
USP3	9.16192e-06
CD93	9.16081e-06
SLF1	9.16035e-06
FAM98C	9.16031e-06
ORAI1	9.16031e-06
TMEM201	9.16031e-06
SSRP1	9.15644e-06
RAB21	9.15266e-06
BCAP29	9.15226e-06
INTS9	9.14789e-06
PSMB7	9.146e-06
ATP5MC1	9.14561e-06
ZDHHC6	9.14302e-06
FXR1	9.14125e-06
SLCO3A1	9.13878e-06
SLC36A4	9.13841e-06
DEGS2	9.1378e-06
ETAA1	9.13729e-06
CDKN2AIP	9.13396e-06
TMEM214	9.13242e-06
ENSSSCG00000007454	9.13242e-06
PRKCSH	9.13143e-06
ENSSSCG00000013723	9.13004e-06
CCDC6	9.12969e-06
RAPGEF2	9.12836e-06
ACP5	9.12659e-06
SMC6	9.12621e-06
DERA	9.12502e-06
ALS2	9.12282e-06
COPZ1	9.12047e-06
SLC16A3	9.11892e-06
GP9	9.11854e-06
DERPC	9.11854e-06
ENSSSCG00000007253	9.11821e-06
HMGN2	9.11667e-06
IQCE	9.11435e-06
UTP15	9.11203e-06
ARL14EP	9.11011e-06
HMGA1	9.10595e-06
MDH2	9.10531e-06
ENSSSCG00000033500	9.1049e-06
ENSSSCG00000025525	9.10095e-06
ECH1	9.10056e-06
LAMP2	9.0976e-06
ACBD3	9.09145e-06
STXBP5	9.09095e-06
SFR1	9.09091e-06
TMC8	9.09091e-06
PPP1R10	9.08974e-06
DDT	9.08575e-06
PTGES3	9.08415e-06
UBN1	9.07716e-06
TARS	9.07716e-06
CD27	9.06847e-06
2021-09-02	9.06344e-06
RPL22	9.04522e-06
PIGT	9.04146e-06
ENSSSCG00000020790	9.03825e-06
ELL2	9.03763e-06
LACTB2	9.03614e-06
SPRYD7	9.02921e-06
CSDE1	9.02773e-06
ELOVL5	9.02445e-06
ABCD1	9.02374e-06
ZMAT5	9.02256e-06
IPO8	9.01846e-06
LAMTOR1	9.01594e-06
TIMM17B	9.01394e-06
RETREG2	9.01302e-06
ATP5MC2	9.01185e-06
MFSD6	9.00499e-06
RIPOR1	8.9955e-06
HAVCR2	8.98204e-06
LMBR1L	8.96861e-06
TFDP1	8.96766e-06
MRPL58	8.95459e-06
PCBP2	8.94418e-06
SH2D1A	8.93908e-06
ENSSSCG00000007789	8.92857e-06
CYP4V2	8.92319e-06
KLHL15	8.90917e-06
RCHY1	8.90508e-06
FGF11	8.90208e-06
RABEP2	8.89859e-06
SERP1	8.89858e-06
GRK6	8.89554e-06
SMG7	8.88889e-06
ENSSSCG00000015434	8.88755e-06
SMIM4	8.88102e-06
ENSSSCG00000023603	8.87373e-06
ECHDC1	8.869e-06
TBC1D10C	8.85836e-06
ENSSSCG00000026746	8.85253e-06
SLC25A6	8.78303e-06
ENSSSCG00000006395	8.74604e-06
ENSSSCG00000003226	8.7239e-06
HNRNPU	8.66645e-06
ENSSSCG00000027196	8.60217e-06
ACTB	8.56246e-06
RPL7A	8.49967e-06
GSTA4	8.46806e-06
RPS10.NUDT3	8.45996e-06
NDUFAF3	7.70194e-06
RPS5	7.11278e-06
RPL37	7.0141e-06
ENSSSCG00000009341	6.8318e-06
NOLC1	6.74774e-06
ENSSSCG00000012202	6.72904e-06
ATP6V0B	6.69362e-06
TRMT112	6.67265e-06
GTF2E2	6.66525e-06
ZNF827	6.65234e-06
ENSSSCG00000007188	6.63415e-06
PEPD	6.61613e-06
ENSSSCG00000012178	6.60636e-06
CCNG2	6.56484e-06
CDC26	6.56285e-06
PAK1IP1	6.55971e-06
ZNF260	6.55372e-06
NDUFB9	6.55067e-06
HSPA8	6.54267e-06
PNPO	6.53595e-06
FAM172A	6.5339e-06
GADD45GIP1	6.52532e-06
RASAL2	6.52401e-06
ENSSSCG00000011077	6.51658e-06
CMSS1	6.51629e-06
ENSSSCG00000012757	6.51549e-06
RPL26	6.5123e-06
SLAMF7	6.50593e-06
ENSSSCG00000017928	6.50373e-06
DPM2	6.50264e-06
TRRAP	6.49927e-06
WDR1	6.49783e-06
TAF1B	6.4936e-06
ENSSSCG00000033572	6.49351e-06
TM9SF2	6.49257e-06
CRYL1	6.48417e-06
NDUFA1	6.48298e-06
ENSSSCG00000010517	6.47679e-06
TUBA4A	6.47337e-06
TOX4	6.47327e-06
ATP6V1E1	6.47319e-06
PPIH	6.47033e-06
ENSSSCG00000040566	6.46204e-06
C4orf48	6.46134e-06
MMADHC	6.46036e-06
HERC4	6.45173e-06
ENSSSCG00000016903	6.45161e-06
UTP3	6.447e-06
DCAF1	6.44668e-06
RNF125	6.44223e-06
HDDC2	6.44122e-06
RNF113A	6.44122e-06
GDI1	6.43603e-06
CRTC2	6.43491e-06
ENSSSCG00000037364	6.43238e-06
RAB5C	6.43136e-06
SERINC5	6.43093e-06
CD38	6.42643e-06
PLEKHA2	6.4238e-06
DIS3	6.42055e-06
ENSSSCG00000030002	6.41026e-06
RAB6A	6.41026e-06
SNRPD3	6.40909e-06
SPPL2A	6.40175e-06
CCDC62	6.39492e-06
RBKS	6.39058e-06
APOO	6.38978e-06
TBC1D7	6.38978e-06
LTA4H	6.38978e-06
WDR45B	6.38978e-06
ALYREF	6.38978e-06
ITGB1	6.38561e-06
R3HDM4	6.38346e-06
ATP6AP2	6.38331e-06
SRSF4	6.38215e-06
AP2A2	6.38062e-06
ENSSSCG00000003719	6.37959e-06
ACSL1	6.37959e-06
PUS7L	6.37959e-06
WDR70	6.37873e-06
BCAP31	6.37499e-06
SLC9A8	6.37253e-06
FAM192A	6.37138e-06
TMEM134	6.36969e-06
EIF4G3	6.36943e-06
ENSSSCG00000035650	6.36943e-06
SLC29A3	6.36943e-06
SDE2	6.36943e-06
INPP4B	6.36924e-06
SMCHD1	6.36871e-06
CD84	6.36736e-06
YEATS4	6.36648e-06
OGFOD1	6.36249e-06
LMBRD1	6.36177e-06
R3HDM1	6.36103e-06
HSD17B4	6.36025e-06
WDTC1	6.3593e-06
PGPEP1	6.3593e-06
CXorf38	6.3593e-06
XRN2	6.3593e-06
TRMT2A	6.3593e-06
VPS25	6.3579e-06
GZMB	6.35554e-06
ACADSB	6.35439e-06
CSF1R	6.35425e-06
ENSSSCG00000007088	6.35395e-06
TMED4	6.35224e-06
MBNL1	6.352e-06
WDR83	6.34921e-06
JPT2	6.34921e-06
ERCC5	6.34921e-06
DEGS1	6.34921e-06
ZNF862	6.34921e-06
GPR137B	6.34485e-06
APOBEC3B	6.34483e-06
ZRANB2	6.34221e-06
HK1	6.34144e-06
MLLT1	6.33914e-06
PDLIM1	6.33914e-06
PDE7A	6.33914e-06
DNAL4	6.33914e-06
CKB	6.33914e-06
N4BP2	6.33753e-06
ENSSSCG00000031594	6.33747e-06
ELK1	6.33432e-06
SF3B5	6.33216e-06
MYO5A	6.32993e-06
GOLIM4	6.32951e-06
ENSSSCG00000013650	6.32911e-06
DPCD	6.32911e-06
ZBTB46	6.32911e-06
AMMECR1	6.32911e-06
ENSSSCG00000032942	6.32705e-06
TENT5C	6.32699e-06
KAT14	6.3243e-06
ZADH2	6.32421e-06
ERO1A	6.32421e-06
HSDL1	6.32415e-06
ARID4B	6.32022e-06
EIF4EBP3	6.31951e-06
IFITM3	6.31932e-06
ENSSSCG00000010440	6.31914e-06
PTAR1	6.31912e-06
ABHD6	6.31912e-06
NAPEPLD	6.31912e-06
SARS	6.31858e-06
TSTD1	6.31072e-06
FBXO9	6.30993e-06
PPTC7	6.30921e-06
TIMM50	6.30915e-06
CENPE	6.30915e-06
SH3RF3	6.30915e-06
UHRF1BP1	6.30915e-06
SYNE3	6.30915e-06
DCLRE1C	6.30915e-06
CDK6	6.30505e-06
MRPS12	6.30484e-06
BCCIP	6.30465e-06
MAPRE2	6.30374e-06
PATZ1	6.29998e-06
OTUD3	6.29921e-06
MCRIP2	6.29921e-06
TIGD2	6.29921e-06
ENSSSCG00000006984	6.29921e-06
STX16	6.29921e-06
ENSSSCG00000039139	6.29921e-06
NDUFA9	6.29917e-06
ADI1	6.29887e-06
ENSSSCG00000014387	6.2988e-06
PTOV1	6.29748e-06
DNAJC7	6.29669e-06
ATP5MC3	6.29598e-06
CZIB	6.29544e-06
BCAT2	6.29429e-06
CALM3	6.29151e-06
RAPGEF3	6.29086e-06
PIAS2	6.2904e-06
TNPO2	6.29014e-06
RABEPK	6.28931e-06
CDC23	6.28931e-06
OLA1	6.28931e-06
UBN2	6.28931e-06
CYB5R4	6.28931e-06
ENSSSCG00000011236	6.28931e-06
CNNM4	6.28931e-06
ENSSSCG00000033312	6.28931e-06
TSR2	6.28931e-06
MSL2	6.28863e-06
MRPL27	6.28577e-06
C17orf58	6.28524e-06
PHAX	6.28446e-06
MKKS	6.28437e-06
IL4R	6.28331e-06
DUSP28	6.28289e-06
TNFRSF1A	6.28275e-06
CARNMT1	6.28069e-06
COMT	6.28019e-06
ENSSSCG00000009911	6.27982e-06
NADK2	6.27982e-06
SPAG9	6.27961e-06
PIM2	6.27943e-06
DCP1B	6.27943e-06
TSC22D1	6.27943e-06
ADORA2B	6.27943e-06
MTPN	6.27943e-06
GRHPR	6.27938e-06
ORC6	6.27692e-06
SLC35B3	6.27621e-06
PRKAA1	6.27444e-06
ENSSSCG00000040801	6.27425e-06
UBFD1	6.27312e-06
ARID5A	6.27084e-06
NAPG	6.27058e-06
TMEM120A	6.27058e-06
OGN	6.27058e-06
TMEM30A	6.27001e-06
SLC49A3	6.26998e-06
ENSSSCG00000028458	6.26973e-06
CTSO	6.26965e-06
TCOF1	6.26959e-06
CEP83	6.26959e-06
EXOSC8	6.26959e-06
MKNK1	6.26959e-06
ENSSSCG00000012541	6.26959e-06
PGRMC1	6.26959e-06
RGS18	6.26959e-06
COX7A2	6.26907e-06
UBC	6.26871e-06
MRPS2	6.26801e-06
ENSSSCG00000033037	6.26603e-06
FGD3	6.2655e-06
ZNF609	6.26401e-06
GDPD5	6.26279e-06
EIF3A	6.26179e-06
GNE	6.25978e-06
RRP1	6.25978e-06
PLK3	6.25978e-06
ITPR2	6.25978e-06
ENSSSCG00000017942	6.25978e-06
ENSSSCG00000023264	6.25978e-06
ENSSSCG00000007749	6.25978e-06
CMBL	6.25869e-06
TTLL12	6.25657e-06
BOLA3	6.2552e-06
AUP1	6.25505e-06
ABCB7	6.25492e-06
BCL3	6.25258e-06
ENSSSCG00000013042	6.25098e-06
NPAT	6.25055e-06
SSH1	6.25038e-06
ANKRA2	6.25e-06
RHBDD3	6.25e-06
NSMCE2	6.25e-06
ZNF449	6.25e-06
TTC33	6.25e-06
ENSSSCG00000025403	6.25e-06
TNRC6A	6.25e-06
ARID1A	6.24762e-06
ENSSSCG00000008309	6.24685e-06
ENSSSCG00000036970	6.24598e-06
PIK3CD	6.24367e-06
UTRN	6.24267e-06
ARFGEF1	6.24244e-06
SLC9A3R2	6.24184e-06
MRPS34	6.24031e-06
ENSSSCG00000033424	6.24026e-06
ARHGEF7	6.24026e-06
NECTIN2	6.24025e-06
ENSSSCG00000003664	6.24025e-06
ENSSSCG00000013862	6.24025e-06
ATPAF2	6.24025e-06
LANCL2	6.24025e-06
ALAD	6.24025e-06
LENG1	6.24025e-06
NFIC	6.24025e-06
MIS12	6.24025e-06
PGM1	6.23999e-06
SUOX	6.23947e-06
FAM53B	6.23648e-06
IL16	6.23603e-06
CLOCK	6.23584e-06
TMUB1	6.23548e-06
C17orf75	6.23548e-06
SNAPC1	6.23542e-06
ENSSSCG00000001433	6.23542e-06
NAA16	6.23539e-06
CRKL	6.23392e-06
NCAPD3	6.23309e-06
PI4K2B	6.23107e-06
ADIPOR2	6.23107e-06
BIN3	6.23091e-06
XRCC6	6.23067e-06
LACTB	6.23053e-06
MFN2	6.23053e-06
DGCR8	6.23053e-06
ENSSSCG00000012238	6.23053e-06
FMR1	6.23053e-06
CTDSP2	6.23053e-06
PFKP	6.23053e-06
OGFR	6.23053e-06
RBM18	6.22967e-06
HILPDA	6.22653e-06
COQ5	6.22628e-06
PPP1CB	6.22599e-06
NCK2	6.22587e-06
VPS54	6.22578e-06
SF3B1	6.22568e-06
RNF25	6.22568e-06
EDEM3	6.22565e-06
GAREM2	6.22539e-06
CCDC91	6.22469e-06
ULK1	6.22426e-06
ENSSSCG00000013596	6.2234e-06
ENSSSCG00000008845	6.22234e-06
TESPA1	6.22223e-06
REEP4	6.22138e-06
TIPRL	6.22122e-06
LPGAT1	6.22085e-06
DAGLB	6.22085e-06
NDUFAF1	6.22084e-06
ENSSSCG00000027046	6.22084e-06
PSTPIP2	6.22084e-06
ENSSSCG00000011678	6.22084e-06
PPP1R14B	6.22084e-06
MLST8	6.22084e-06
TSSK4	6.22084e-06
GABARAPL1	6.22084e-06
ZEB1	6.22084e-06
ENSSSCG00000018029	6.22084e-06
APH1A	6.22044e-06
DDX39B	6.22016e-06
PCGF6	6.21982e-06
SECISBP2	6.21709e-06
CBX6	6.21604e-06
TXNDC9	6.21434e-06
ENSSSCG00000035224	6.21131e-06
NOL4L	6.21124e-06
THUMPD3	6.21118e-06
CTR9	6.21118e-06
TARBP1	6.21118e-06
ENSSSCG00000003352	6.21118e-06
OSBPL5	6.21118e-06
B3GAT3	6.21118e-06
ENSSSCG00000032119	6.21118e-06
CNOT8	6.21118e-06
PGS1	6.21118e-06
VCPKMT	6.21096e-06
FUBP3	6.20666e-06
CDV3	6.20666e-06
ZPBP2	6.20654e-06
MFAP1	6.20519e-06
DNAAF5	6.20505e-06
GPR141	6.20491e-06
FCHSD2	6.20228e-06
GGACT	6.20209e-06
TICAM1	6.20155e-06
GORASP2	6.20155e-06
ENSSSCG00000033792	6.20155e-06
ENSSSCG00000039523	6.20155e-06
EFNB1	6.20155e-06
ZBTB33	6.20155e-06
ENSSSCG00000012602	6.20155e-06
MPP7	6.20155e-06
JAZF1	6.20155e-06
DVL3	6.20032e-06
CGA	6.19738e-06
ENSSSCG00000007031	6.19693e-06
SUPT4H1	6.19676e-06
ERCC4	6.19644e-06
ENSSSCG00000018061	6.19597e-06
NKTR	6.1947e-06
POLG	6.19375e-06
ENSSSCG00000011237	6.19248e-06
ENSSSCG00000012046	6.19248e-06
KANSL3	6.19208e-06
ZNF35	6.19195e-06
GMEB1	6.19195e-06
UNC119B	6.19195e-06
STX6	6.19195e-06
DDX24	6.19195e-06
MSH3	6.19195e-06
PDGFA	6.19195e-06
DHRS7B	6.19195e-06
MRPL28	6.19023e-06
MFSD5	6.18912e-06
NOC2L	6.1889e-06
SLTM	6.18866e-06
ZNRD1	6.18831e-06
ENSSSCG00000000611	6.18799e-06
ENSSSCG00000004583	6.18778e-06
THRA	6.18761e-06
ENSSSCG00000015473	6.18746e-06
DSP	6.18725e-06
TLK2	6.18688e-06
RSL1D1	6.1857e-06
SH3KBP1	6.18404e-06
TLR2	6.18275e-06
LASP1	6.18265e-06
JMY	6.18238e-06
CRNKL1	6.18238e-06
CD109	6.18238e-06
CNFN	6.18238e-06
ZMYM4	6.18238e-06
ZNF75D	6.18238e-06
PGK1	6.17867e-06
ATP13A1	6.17551e-06
MYCBP2	6.17532e-06
C19orf54	6.17356e-06
ENSSSCG00000009772	6.17355e-06
[truncated: 12,388 more rows]

## Sheet: 6v31_Impurity
Supplementary File 14. Random forest pair-wise analyses of CD2 ɣ𝛿 T-cell cluster. For each model represented below the porcine scRNA-seq cluster IDs compared are shown along with the parameters used and resulting OOB prediction error. Variable importance was assigned by measuring node impurity (Impurity) and using permutations (Permutation). Features that reduced error in predictive accuracy are …
Gene	Impurity
CCL5	17.7834
SRGN	9.71188
ENSSSCG00000032017	9.1606
RHEX	8.80671
ENSSSCG00000036618	8.22813
KLRK1	8.1558
CD2	7.79003
GNLY	7.53908
TRAT1	7.28083
FCER1G	7.05298
NKG7	7.03716
ENSSSCG00000026217	5.85025
GPX1	5.55492
ENSSSCG00000016903	5.31913
ADGRG1	5.05167
GZMM	4.58736
CD8A	4.56086
LCK	4.47105
ENSSSCG00000024973	4.21031
ID2	4.11125
RDX	3.61628
CX3CR1	3.56201
CD244	3.32567
ENSSSCG00000012119	3.20866
ITGA4	3.03206
ENSSSCG00000008898	2.98101
TBX21	2.96559
BATF	2.87439
IL2RB	2.86724
FAM49A	2.5647
HLA.DRA	2.35827
SLA.DQB1	2.15541
ID3	2.04147
ENSSSCG00000000640	2.00629
PTPN22	2.00527
ANXA1	2.00426
S1PR5	1.8442
GZMB	1.8408
ENSSSCG00000036114	1.81377
CD1D	1.75772
ENSSSCG00000014565	1.71446
ITM2B	1.71219
GATA3	1.66972
ENSSSCG00000023584	1.63431
ENSSSCG00000000663	1.6132
CD247	1.57893
FTL	1.49697
ENSSSCG00000034617	1.49508
DUT	1.45982
ENSSSCG00000006919	1.44908
SNX10	1.42973
ARPC5L	1.39888
CAMK4	1.39398
FSCN1	1.34151
FGR	1.30757
SAMD3	1.28458
CTSW	1.28431
ENSSSCG00000003042	1.27123
TESC	1.25536
PLEK	1.2531
ITGB1	1.25013
IKZF2	1.24507
ENSSSCG00000001455	1.20898
EFHD2	1.16361
CST7	1.13125
RPS16	1.12008
BLK	1.11821
SEMA6D	1.09777
ITM2C	1.06128
ENSSSCG00000033721	1.05874
CAPG	1.01866
ENSSSCG00000029596	1.00391
RPS27	1.00192
SELL	0.981972
UBAC2	0.960823
ENSSSCG00000039658	0.937164
RPL34	0.93292
SERPINB9	0.916627
COX1	0.913459
ACTG1	0.904018
S100A10	0.889873
PPP1CC	0.879121
BCAS4	0.876002
RPS11	0.873191
IFI6	0.867634
PTPN12	0.84538
PRF1	0.834077
SKAP2	0.797542
AOAH	0.786605
COX3	0.778224
UCP2	0.772205
ENSSSCG00000034868	0.757345
ITGAL	0.756
CTSD	0.754131
CD74	0.71718
SAMSN1	0.705406
ENSSSCG00000035224	0.692136
CD99	0.657725
ENSSSCG00000001456	0.653479
ITGAM	0.613772
ENSSSCG00000037187	0.612316
RORA	0.602929
TMEM123	0.594341
ENSSSCG00000005095	0.583941
PLEKHF2	0.580903
NAPSA	0.577282
ANXA2	0.574833
ZNF683	0.566307
SH2D1A	0.563676
FLNA	0.560987
RPS3A	0.560108
FAM49B	0.559854
RPL22	0.548492
PTMA	0.547385
PLEKHF1	0.540084
PRR5	0.536185
S100A13	0.533775
ITGB2	0.533095
SLA.DMA	0.528681
YBX3	0.528224
CD96	0.511783
XCL1	0.510595
RAC2	0.504201
ENSSSCG00000035080	0.485534
EIF3I	0.458627
STK17B	0.436803
LSP1	0.429724
ENSSSCG00000020777	0.41719
COTL1	0.414326
ENSSSCG00000035520	0.414182
S100A1	0.413418
FUNDC1	0.403525
ENSSSCG00000011272	0.399528
RPS14	0.396961
ZEB2	0.391584
UBB	0.390871
B2M	0.38263
CCSAP	0.377678
PPP3CC	0.371254
ENSSSCG00000014855	0.368815
THEMIS2	0.366661
SUPT4H1	0.363818
DDX5	0.354088
TOX	0.351073
GPR183	0.348813
RPL6	0.347924
RAP1B	0.345895
ENSSSCG00000004489	0.344214
RILPL2	0.341917
ENSSSCG00000030300	0.337909
EVL	0.333559
TMEM71	0.333454
CRTAM	0.328157
ENSSSCG00000009673	0.327198
H2AFV	0.32305
ENSSSCG00000012916	0.321028
ENSSSCG00000025928	0.319965
CALHM6	0.318231
KLHL8	0.315503
WDR1	0.313365
GPR55	0.310552
EMB	0.310319
PCOLCE	0.310155
CD226	0.30834
CCL3L1	0.305939
FCER1A	0.305928
LAT2	0.302981
ENSSSCG00000003691	0.300637
ABHD15	0.299752
ENSSSCG00000034914	0.290538
STMN1	0.290532
RPSA	0.290294
ENSSSCG00000031897	0.281648
CYBRD1	0.27745
GPR18	0.276883
RPL5	0.268036
LTB	0.26694
HMGB2	0.265981
ENSSSCG00000017749	0.26466
CD52	0.264418
TNFSF10	0.263521
C15orf48	0.262814
LCP1	0.262516
ARPC1B	0.262141
SLC9A3R1	0.261481
RPL37	0.261389
ENSSSCG00000021591	0.25978
ND4	0.258505
ENSSSCG00000033734	0.253779
RPL35	0.250489
FYB1	0.243693
POLR1D	0.241486
RHOQ	0.241451
RPLP0	0.240065
FGL2	0.238926
ENSSSCG00000040273	0.232235
ZAP70	0.229449
CCR5	0.227858
ENSSSCG00000015447	0.227294
PIK3R1	0.223528
PLAC8	0.222879
ISG20	0.222625
PIK3CG	0.2226
ENSSSCG00000027826	0.219696
MAP2K2	0.219622
BTG1	0.219452
EMP3	0.218177
ARRB2	0.217234
ENSSSCG00000022912	0.216814
TXNIP	0.216289
MIF	0.216214
RGS19	0.213464
HINT1	0.212186
CXCR3	0.210902
OSBPL3	0.210387
SPNS3	0.209509
SIT1	0.209298
PARK7	0.209268
RIN3	0.208879
ENSSSCG00000001229	0.206377
TUBA1B	0.205329
ENSSSCG00000007188	0.204657
PTH1R	0.20284
AP2S1	0.202485
PNRC1	0.202388
GRB2	0.201582
ENSSSCG00000036296	0.198576
EOMES	0.197934
ENSSSCG00000000635	0.197352
ARPC2	0.197056
RPS21	0.19697
IFITM3	0.196956
ENSSSCG00000000576	0.194041
ENSSSCG00000039071	0.193243
TUBB	0.192682
ENSSSCG00000027196	0.192105
ENSSSCG00000003930	0.190928
IFNG	0.18708
ENSSSCG00000013597	0.186109
HCST	0.185599
RPS20	0.184263
SNTB2	0.182174
S100A11	0.181521
PNPLA6	0.180819
ENSSSCG00000035768	0.180655
COX5B	0.180628
PRDX3	0.179938
FASLG	0.179025
HVCN1	0.179005
ZFP36L2	0.176952
ENSSSCG00000038507	0.176909
RPS15	0.176707
RASAL3	0.176582
ATP6	0.176085
ENSSSCG00000035811	0.1731
RPL9	0.172512
RPL11	0.172128
ENSSSCG00000001341	0.171342
LPCAT2	0.170642
LITAF	0.170209
2021-09-01	0.1687
ENSSSCG00000001407	0.168661
ENSSSCG00000037030	0.165952
VMP1	0.163692
ACTB	0.162315
JAKMIP1	0.162281
GYG1	0.161079
ENSSSCG00000000097	0.16105
RPS18	0.160999
LPAR6	0.160307
ENSSSCG00000031088	0.160272
EEF1B2	0.159458
ENSSSCG00000028485	0.159138
ENSSSCG00000015664	0.15904
MYO1F	0.157254
CNBP	0.156715
HSD11B1L	0.156166
HSP90AA1	0.155756
ENSSSCG00000036096	0.155369
AQP3	0.15364
ENSSSCG00000032003	0.153109
TYROBP	0.152085
ENSSSCG00000003914	0.151867
ENSSSCG00000003903	0.151134
ARL4C	0.150886
ENSSSCG00000013720	0.150367
PTPRC	0.149922
UPB1	0.149708
PLAAT3	0.149649
ND1	0.149534
RPL36AL	0.148938
LGALS1	0.148705
TP53I13	0.148407
ENSSSCG00000033500	0.148101
TMSB10	0.147508
CCDC50	0.14734
ENSSSCG00000005453	0.147199
RPS5	0.145395
CD86	0.144523
RPLP2	0.143216
ENSSSCG00000002907	0.142986
RPS12	0.142709
KLRB1	0.142182
SEC61B	0.140078
PTP4A2	0.139204
RPS6	0.13886
BRK1	0.138687
MYL6	0.138669
RPS13	0.138594
ENSSSCG00000020830	0.137762
ENSSSCG00000006081	0.137603
VIM	0.13749
TNFRSF1B	0.137266
ENSSSCG00000004970	0.137168
TTF2	0.137062
FAM89A	0.136549
ENSSSCG00000001063	0.13629
HMCES	0.135558
SH3BGRL3	0.135389
TMEM134	0.13329
HSPE1	0.133174
EIF3K	0.133072
TCF7	0.132467
GBP2	0.131895
NCALD	0.131804
CCRL2	0.131563
PSMB9	0.131492
TRAPPC5	0.13101
FBXO39	0.130526
ATP5MC3	0.129983
RPL7	0.129953
TPT1	0.129157
GABARAP	0.129151
COX6C	0.129136
ENSSSCG00000014909	0.128978
ENSSSCG00000016737	0.128476
ENSSSCG00000011952	0.12771
CYTB	0.126898
ENSSSCG00000008170	0.125958
RPL3	0.1246
EIF4A2	0.124026
KRAS	0.123504
ENSSSCG00000034448	0.122968
PRDM1	0.122135
ENSSSCG00000024974	0.122009
ENSSSCG00000033733	0.121716
OAZ1	0.120356
GMFG	0.120313
PIK3AP1	0.119134
NBEAL2	0.118945
MBOAT1	0.118731
ENSSSCG00000039544	0.117732
EGLN3	0.117697
VAMP5	0.117669
IKZF3	0.117312
ENSSSCG00000005481	0.116511
ENSSSCG00000009303	0.116118
TRMT112	0.114745
RPS23	0.11472
EMP1	0.114543
UBXN11	0.114233
ENSSSCG00000032556	0.114224
SSRP1	0.113644
TIAM1	0.113562
CORO1A	0.113402
CARHSP1	0.113235
ENSSSCG00000008433	0.113083
STARD4	0.112961
HMGN3	0.112411
ENSSSCG00000017509	0.111822
CD3G	0.110927
IPO11	0.110814
S100A4	0.110306
DYNLT3	0.110006
SHKBP1	0.109776
NDUFS7	0.108764
OSBPL8	0.108666
NAA40	0.107517
ENSSSCG00000008061	0.10742
RACK1	0.107226
RUNX3	0.107095
ENSSSCG00000013889	0.106989
RPS17	0.106822
SRSF10	0.106184
ENSSSCG00000035256	0.105305
NPM1	0.105038
S100A6	0.104788
DNAJA1	0.104677
ENSSSCG00000017239	0.104052
PARP12	0.103967
LMO4	0.103911
EDF1	0.103834
TKT	0.103719
DHRS3	0.103664
FAM83A	0.103663
TPI1	0.103269
IL6R	0.103237
ND2	0.103201
HSPA8	0.102796
RPL17.C18orf32	0.102738
ENSSSCG00000018063	0.102549
NME2	0.102323
MED27	0.101904
ENSSSCG00000033697	0.101407
ENSSSCG00000031705	0.100612
RPL27	0.100267
COX7A2	0.0998815
RPL23	0.0997165
ENSSSCG00000030015	0.0994173
MRRF	0.0994101
DAD1	0.0993964
LAPTM5	0.0983076
NDFIP1	0.0982951
CD3E	0.0982127
H3F3A	0.0980768
TNFSF14	0.0980214
EIF3H	0.0976684
ENSSSCG00000027907	0.0972445
ENSSSCG00000006156	0.0965688
SOD1	0.0965376
GAPDH	0.0963872
GPR37	0.0962724
CDC42EP3	0.0961403
ENSSSCG00000037602	0.0961183
DBI	0.0958916
RPS6KA1	0.0958019
PNISR	0.0957748
RCHY1	0.0956773
RCAN3	0.0952592
CCNG1	0.0948083
SERTAD1	0.0943539
RFX2	0.0939451
PPP1R18	0.0934291
ENSSSCG00000012166	0.0933873
SERBP1	0.0933868
LEF1	0.0932302
ENSSSCG00000033019	0.0931645
FUNDC2	0.0929002
ENSSSCG00000033909	0.0913149
CA11	0.0912508
HNRNPK	0.0912492
CIRBP	0.0912338
IRF2	0.0912244
ENSSSCG00000011329	0.0910755
ENSSSCG00000017032	0.0909626
ENSSSCG00000035162	0.0906956
ENSSSCG00000013992	0.0904535
SLC25A24	0.0904528
EZR	0.0904489
COX4I1	0.0899616
ERH	0.0898862
WAS	0.0897899
FKBP11	0.0896042
S1PR1	0.0888706
ENSSSCG00000027778	0.08882
RPL26	0.0887766
FERMT3	0.0887645
COX2	0.0886646
PRDX2	0.0886269
CAPZA1	0.0885394
ENSSSCG00000027790	0.088524
NDUFB9	0.0885135
SMPD1	0.0884643
ENSSSCG00000037595	0.0883303
PSIP1	0.0883067
CFL1	0.0882254
KXD1	0.0879819
RHOG	0.0877557
ANAPC13	0.0875351
CAPZB	0.0874556
ENSSSCG00000012397	0.0873525
SSR4	0.0872273
ENSSSCG00000034896	0.0871875
RPS26	0.0870392
RABAC1	0.0869962
LYN	0.0868326
ENSSSCG00000039046	0.0862828
PNN	0.0862485
COX8A	0.086218
CD53	0.0861738
NCK1	0.086013
ENSSSCG00000000657	0.0859406
SF3B5	0.0857761
RPL10	0.0857577
ENSSSCG00000035507	0.0857179
PTPRE	0.0854056
NFKBIB	0.085286
ATP5F1E	0.0852354
TRDC	0.0852068
RPL10A	0.0851788
CBLB	0.0847173
SPINT2	0.0846929
ENSSSCG00000016902	0.0846625
NDUFS8	0.0842931
ARHGDIB	0.0839538
SLC11A2	0.0838274
ENSSSCG00000028663	0.0831203
ENSSSCG00000012811	0.0829312
ENSSSCG00000015710	0.0828187
ENSSSCG00000037775	0.0821476
ENSSSCG00000000636	0.0819774
ZRANB2	0.0819444
CD63	0.0816477
SRSF6	0.081618
ENSSSCG00000002449	0.0814214
ENSSSCG00000017146	0.0811983
TECR	0.0811699
MRPL57	0.0810295
EEF2	0.0808061
ZBTB8OS	0.0807791
ENSSSCG00000027348	0.0806187
RGS1	0.0804998
ARPC3	0.080434
ENSSSCG00000016263	0.0804207
ENSSSCG00000016990	0.0802354
SF3B6	0.0802044
HSPB1	0.0799707
ENSSSCG00000039407	0.0799032
COX7A2L	0.0794915
KLHL26	0.0793344
SPTBN1	0.0791362
CFDP1	0.0785209
ZFP36L1	0.0785121
MRPS25	0.0784989
THEMIS	0.0783916
CALM1	0.0782693
ENSSSCG00000033653	0.0781303
ENSSSCG00000034709	0.078052
SSB	0.0780458
OXA1L	0.0779115
ENSSSCG00000031773	0.0778433
VPS25	0.0774744
TERF2IP	0.0773523
FMNL1	0.0772522
RPS9	0.0771371
LRMP	0.0765954
RPS10.NUDT3	0.0765849
RPL7A	0.0765445
KRTCAP2	0.0764757
EIF1	0.0764089
UNC119	0.076219
HNRNPDL	0.0760506
SMC4	0.0760435
SAP18	0.0756599
EEF1D	0.0755501
BAZ1A	0.0755345
PSMB10	0.0754038
FLI1	0.0753974
CXXC5	0.0753941
ARHGAP27	0.0751673
JAK1	0.075119
PTPN1	0.074916
SMCHD1	0.0748628
LRCH4	0.0747416
CMAS	0.0746215
PAK2	0.0743857
ENSSSCG00000013661	0.0743218
SHISA5	0.0741475
TMEM38B	0.0740617
SEC61G	0.0740604
ENSSSCG00000002550	0.0740342
TMA7	0.0738845
HYPK	0.0738461
CCDC69	0.073731
TMBIM6	0.0737166
ENSSSCG00000037565	0.0734044
FAXDC2	0.0733607
YWHAZ	0.073335
AIMP1	0.0732934
SAT1	0.0731811
ENSSSCG00000012517	0.0730236
DAPL1	0.072961
PPIB	0.0728291
SRSF5	0.0727867
RAB5A	0.0727605
HNRNPH1	0.0723089
ENSSSCG00000037885	0.0723003
VPS29	0.0722229
CD37	0.0721633
BCAP31	0.0721216
SEMA4D	0.0720702
GPSM3	0.0717982
TLE5	0.0715657
PVRIG	0.0715046
EIF4G2	0.0714864
ENSSSCG00000020686	0.0713761
RASGRP1	0.0710185
ENSSSCG00000007088	0.0709697
GORASP2	0.0709108
ENSSSCG00000004945	0.0708994
NOL7	0.0708283
PLP2	0.0707882
PSMB2	0.0707196
HCLS1	0.0705854
EIF3E	0.0705806
PLD3	0.0704561
TAGAP	0.0703891
TIMM13	0.0703231
PEA15	0.070268
CCT7	0.0702667
SMC6	0.0701631
ENSSSCG00000037142	0.0700107
BIN2	0.0697761
FAS	0.0696642
SLA.DMB	0.0696051
U2SURP	0.0695904
CCDC80	0.0695829
ENSSSCG00000007098	0.0695122
CALCOCO2	0.0693115
ACADSB	0.0690535
ENSSSCG00000040118	0.0684906
RPL39	0.0684299
ENSSSCG00000003520	0.0682968
CCT3	0.0682917
LAT	0.0682233
BTF3	0.0679787
ENSSSCG00000013064	0.0679786
RAP1A	0.0679729
GYPC	0.0678925
ENSSSCG00000036988	0.0678026
SRPK1	0.0677949
SDF2L1	0.0675631
ENSSSCG00000004145	0.0674872
PTPRCAP	0.0672077
SMARCAL1	0.0671992
EIF2B2	0.0669215
ENSSSCG00000039460	0.0669054
SNF8	0.066881
ENSSSCG00000036716	0.066656
GTF2F2	0.066621
NUCKS1	0.0665991
PIGC	0.0665104
TTYH1	0.0663939
GPR174	0.0663646
ARL6IP5	0.0662568
URM1	0.0660509
ENSSSCG00000000905	0.0659483
IL12RB1	0.0657804
PPP1R12C	0.06573
GPX4	0.0656258
CASC1	0.0655848
ENSSSCG00000030295	0.0655281
COX7C	0.065062
RPS4X	0.0650484
GLIPR2	0.0648982
ENSSSCG00000016758	0.0647726
UBE2D3	0.0645324
KLF2	0.064528
SON	0.0645259
ENSSSCG00000010320	0.064412
ENSSSCG00000014569	0.0641967
ENSSSCG00000004414	0.064078
CTSS	0.0640655
SEC11C	0.0639253
PRKAR2B	0.0638658
ENSSSCG00000013878	0.0638606
GPR34	0.0638292
IL12RB2	0.0636159
ENSSSCG00000001075	0.0635528
MPC2	0.0635337
NDUFS5	0.063295
ENSSSCG00000001398	0.0632322
POLE4	0.0630552
PYCARD	0.0629439
GUK1	0.0629396
GZMK	0.0629144
CD6	0.0628725
TPMT	0.0628286
TXNL1	0.0626598
TPM3	0.0625089
SEC11A	0.0624879
RTF2	0.0624478
CSK	0.062414
HNRNPC	0.0623276
PSMC6	0.0622312
ENSSSCG00000023331	0.0621887
CASS4	0.0621398
TMEM160	0.062109
DGKZ	0.0620204
ENSSSCG00000024500	0.0620111
ENSSSCG00000027573	0.0617552
KIAA2013	0.0616101
TAX1BP1	0.0616061
SSR2	0.0614208
APBB1IP	0.0612637
PCBD2	0.0609186
ENSSSCG00000011234	0.0608078
CTSA	0.0607038
SERP1	0.0606909
ENSSSCG00000006363	0.0605706
CALHM2	0.0605704
ARF6	0.0604583
RTRAF	0.0604461
CD3D	0.0604185
ZNF207	0.0603768
USP25	0.0602429
MPZL3	0.0602319
PSMC3	0.0602177
ATP5PF	0.059984
NTAN1	0.0599819
ENSSSCG00000032894	0.0599146
CD47	0.0599003
ENSSSCG00000004307	0.0597591
ARPC4	0.059688
ENSSSCG00000012961	0.0596101
CHMP4B	0.0595802
SLC35E4	0.0594603
PSMB8	0.0594583
ENSSSCG00000029830	0.0594324
SRI	0.059394
EPS15	0.0592182
ANKS3	0.0591832
ENSSSCG00000036401	0.0589797
ATP5F1C	0.0589687
TIMP1	0.0589092
ENO1	0.058832
TSR3	0.0588009
ENSSSCG00000027491	0.0587436
ENSSSCG00000037081	0.0587203
C12orf57	0.058643
SMARCE1	0.0585281
HIST1H2AB	0.0585142
COX6A1	0.0583735
MPHOSPH8	0.0580903
SCAMP5	0.0580408
RAB4A	0.058016
ALG13	0.0579989
YWHAB	0.0578647
DPM1	0.057759
VPS28	0.0576916
ENSSSCG00000027746	0.0576668
STMN3	0.0576631
ENSSSCG00000009327	0.0576502
ENSSSCG00000009241	0.0576479
HSPA5	0.0575902
UBE2V1	0.0575467
OGFR	0.0575438
HADHB	0.0574401
DCXR	0.0573456
ZNF831	0.0572564
NCL	0.0571238
ENSSSCG00000000273	0.057004
SFT2D1	0.0569965
REEP5	0.0568913
ATP2A3	0.0568212
IQGAP2	0.0567617
DDX17	0.0567353
PSMB7	0.0565319
C11orf58	0.0565221
SRRM1	0.0564927
WTAP	0.0563034
ENSSSCG00000009633	0.0562685
DDX21	0.0561923
NDUFV2	0.0561514
AICDA	0.0561115
ATP5PB	0.0560342
LXN	0.056029
KHDRBS1	0.0560039
ATRX	0.0559423
ENSSSCG00000007609	0.0558903
EEF1AKMT1	0.0558199
SUCLG2	0.055536
GABARAPL2	0.0555087
BHLHE40	0.0554689
CAMTA2	0.0554185
ENSSSCG00000032166	0.0554163
ATXN7L1	0.0553428
PKM	0.0553309
MICOS13	0.05519
ENSSSCG00000031530	0.0551666
PSMA7	0.0551656
ABHD1	0.0550802
ENSA	0.0550536
TIGIT	0.0549904
HADH	0.0549531
PAIP2	0.0548853
POMP	0.0548209
ENSSSCG00000002688	0.0547331
SRSF7	0.0546913
SNW1	0.0546162
FCRL6	0.0545794
GLUD1	0.0544285
ENSSSCG00000027085	0.0543565
H3F3B	0.0542495
NUDT21	0.0541662
BUD31	0.0539928
SLAMF7	0.0539569
DMD	0.0537908
SLC25A6	0.0537519
WBP1	0.0537314
SPTLC2	0.0536231
LIMD2	0.0534037
SEC62	0.0533449
CALM3	0.0533376
CUEDC2	0.0531237
SERPINB1	0.0530878
LRP10	0.0530515
MICOS10	0.0528878
ENSSSCG00000020790	0.0526409
CLINT1	0.0525732
PRKCB	0.05245
LMBR1	0.0523404
PNRC2	0.0523074
UHMK1	0.0521551
SRP19	0.0520837
ATF4	0.0520489
REL	0.0520292
ENSSSCG00000031912	0.0519614
TAPBPL	0.0518844
PPHLN1	0.0518837
ABI1	0.0517355
RGCC	0.0515743
FAM126A	0.0515417
MGST3	0.0515394
NDUFA13	0.0515097
FNBP4	0.0514866
NDUFB7	0.0514636
TNFAIP8	0.051443
2021-09-06	0.0513958
2021-09-07	0.0513697
ENSSSCG00000028479	0.051367
MED7	0.0513429
BNIP3	0.0513197
RESF1	0.0512971
CASC4	0.0512064
NFKBIA	0.0511788
PTBP1	0.0511719
RBL2	0.0511325
COPS2	0.0509121
TIA1	0.0509035
LAMTOR4	0.0508893
ATP6V1G1	0.0508845
PTPN18	0.0508725
ENSSSCG00000009046	0.0508516
PCBP2	0.0507723
SKAP1	0.0505695
BZW1	0.0505688
UBC	0.0505667
SPTAN1	0.0505524
LTA4H	0.0505213
SCAND1	0.0504805
AGPS	0.0503939
NOP10	0.05031
ISCU	0.0502868
TNRC6B	0.0502559
PSMA3	0.0501718
TMEM192	0.0501597
LFNG	0.0500281
ITPA	0.049974
FYN	0.0499306
EIF4H	0.04992
THYN1	0.0498109
ENSSSCG00000037971	0.0497335
SLC1A5	0.0496217
ORAI3	0.0496158
RAB11A	0.0496096
ENSSSCG00000027046	0.0494985
ARF4	0.0494848
FOS	0.0494602
RAB11B	0.0494519
NDUFB11	0.0494408
RIN2	0.049383
ENSSSCG00000005768	0.0493778
ITGB7	0.0493701
SNRK	0.0492432
PSMD7	0.0491124
NCAPD3	0.0491063
ENSSSCG00000013260	0.049082
RNH1	0.0489889
PDLIM7	0.0489743
CD81	0.0489596
ATP5F1A	0.0489023
ATXN7L3B	0.0488903
UBXN1	0.0488173
CCR3	0.0487749
WIPI2	0.0486882
PDIA4	0.0486611
CYBA	0.0486374
MAX	0.0486304
FAM43A	0.0486237
ENSSSCG00000037074	0.0486116
SLC39A10	0.0485664
MAT2A	0.0484709
PFN1	0.0483958
MDM4	0.048369
TUT4	0.0483483
TMEM189	0.0482945
LYSMD2	0.0482842
FAM3C	0.0482603
SNRPD3	0.0481722
AGFG2	0.0481537
MTHFR	0.0480478
OSTF1	0.0480291
ENSSSCG00000040056	0.0480244
C5orf24	0.0480213
PAFAH1B3	0.0480012
MFAP1	0.048001
CCND3	0.0479589
HMGN2	0.0479155
ENSSSCG00000001779	0.0477516
ENSSSCG00000028397	0.0477077
ENSSSCG00000003348	0.0476931
SKP1	0.0476821
FAR2	0.0476289
ENSSSCG00000029160	0.0475995
2021-09-11	0.0475427
MRPL9	0.0475251
ENSSSCG00000031172	0.0475078
SCML4	0.0474855
NR1D1	0.0474423
ENSSSCG00000039706	0.0473294
SOWAHD	0.0473142
CPM	0.0472764
ENSSSCG00000038963	0.0472602
NFIL3	0.0472544
RAB8A	0.0472522
MMD	0.0469812
ARFGAP3	0.0469659
SNRPC	0.0469289
LAPTM4A	0.0468698
DYNLRB1	0.0468222
LAMTOR2	0.0467852
MAPRE2	0.046711
MPG	0.0466372
TRIM22	0.0466327
FRYL	0.0466109
RETNLB	0.0465879
TMEM156	0.0465188
PPM1A	0.0465173
COX17	0.0465151
COX7B	0.0465049
ENSSSCG00000015499	0.0464594
SF3B2	0.0463792
CCPG1	0.0463661
CRIPT	0.0463185
OCIAD1	0.0462393
SUSD3	0.0462219
CNNM4	0.0461666
TRADD	0.0461362
ENSSSCG00000003253	0.046109
FAM162A	0.0460808
RITA1	0.0460685
PAFAH1B1	0.0460623
ATF6	0.0460621
MCRIP1	0.0459913
VAMP8	0.0459521
LEPROTL1	0.0459423
LENG8	0.0459202
RNF7	0.045872
ARHGAP15	0.0458227
GCSAM	0.0457888
DYNLL1	0.0457611
ENSSSCG00000022176	0.0456685
DBNL	0.0455431
ATP6V1F	0.045505
TCEA1	0.0454867
ENSSSCG00000033757	0.0454485
GNG2	0.0453853
WDR45	0.0453706
DUSP1	0.0453223
METTL22	0.0453003
EPSTI1	0.04521
TGIF1	0.0451908
ENSSSCG00000014075	0.0451849
TRAF3IP3	0.0451484
CHD9	0.0451405
SNRPN	0.045127
BIRC5	0.045086
ENSSSCG00000022246	0.045078
ARID4B	0.045013
ENSSSCG00000014540	0.0449516
SMG7	0.0449325
ZFP36	0.0448994
NDUFAF3	0.0448831
TMEM43	0.044719
MSN	0.0447145
TSC22D3	0.0446658
CD2BP2	0.044504
ENSSSCG00000013436	0.0444328
ENSSSCG00000030478	0.0443888
TMED5	0.0443346
ARHGAP4	0.0443016
CHP1	0.0442612
BUB3	0.0442482
TMEM30A	0.0442201
ENSSSCG00000002004	0.0440817
RRP15	0.0440731
DNAJC13	0.0440578
ENSSSCG00000007978	0.0440083
KIT	0.0439988
PIN1	0.0439915
NUMBL	0.0439737
STXBP3	0.0439726
TMCO1	0.0439564
RPS6KB2	0.0439487
ENSSSCG00000007552	0.0439193
ENSSSCG00000039740	0.0437893
EWSR1	0.0437432
PFDN1	0.0437409
LSM2	0.0437031
KMT2E	0.0436992
LAX1	0.0436689
IFI30	0.0435912
SNU13	0.0435749
SIPA1	0.0435683
CEND1	0.0435311
ENSSSCG00000031278	0.0435122
ENSSSCG00000034072	0.0434374
STAG2	0.0434137
TMEM147	0.0433289
SDCBP	0.0432525
ARID5B	0.0432473
ZCCHC7	0.0432396
SERTAD3	0.0432289
MGAT4A	0.0432092
CREB3L1	0.0432056
CIR1	0.0431987
EIF4A1	0.0431875
ARPC5	0.043103
TPR	0.0431013
YWHAQ	0.0430966
ENSSSCG00000037299	0.0430839
HBP1	0.0430629
REX1BD	0.0430488
KCTD20	0.0430332
ATG12	0.0430238
DR1	0.0429536
ISG15	0.0429528
ACOT13	0.042874
ENSSSCG00000036350	0.042836
SUMO1	0.0427515
VPS41	0.0427427
CHMP5	0.042697
PDCD10	0.0425905
SELENOT	0.0424733
ENSSSCG00000015337	0.0424317
UBTF	0.0424175
TAB2	0.0423961
ENSSSCG00000024263	0.0423487
COQ5	0.0423435
ADCK2	0.04229
GPR171	0.0422335
ENSSSCG00000015011	0.0421879
EVI2B	0.0421381
TMEM50A	0.042115
PFDN2	0.0420714
ENSSSCG00000016323	0.0420698
TBCA	0.0420412
MBNL1	0.0420222
ZC3H15	0.0420193
ENSSSCG00000037475	0.0420085
ITPRIPL1	0.0419962
TIMM8B	0.0419865
CYC1	0.0419626
ELK3	0.041946
MAP4K1	0.0419306
RNPS1	0.0419272
IFT122	0.041913
ENSSSCG00000039581	0.0417698
MAP1LC3B	0.0417151
GPBP1	0.0416704
PLAGL1	0.0416694
NMI	0.0416649
ENSSSCG00000010203	0.0415946
GHR	0.0415754
PARVG	0.0415552
GTF2H5	0.0415367
CDC42SE1	0.0414631
PSMC4	0.0414184
ENSSSCG00000013366	0.041396
NSMF	0.0412916
ENSSSCG00000013596	0.0412005
ENSSSCG00000013232	0.0411753
ENSSSCG00000000071	0.0411548
YTHDF2	0.0410899
CNPY2	0.0410454
VASP	0.0409792
UCHL5	0.0409715
FUS	0.0409366
FAM32A	0.0409294
BECN1	0.0409198
ENSSSCG00000007355	0.0408934
EIF3D	0.0408687
SEMA7A	0.0408212
ENSSSCG00000017940	0.0407716
ENSSSCG00000036257	0.0407709
RPAP2	0.0407702
PAXX	0.040744
CHD1	0.0407218
BAZ2A	0.0407141
CAST	0.0406623
PSTPIP2	0.0406594
RSRP1	0.0406468
ENSSSCG00000007435	0.0406421
DDT	0.0405511
CANX	0.0404854
RHOH	0.0404779
ENSSSCG00000005518	0.0404638
SRSF2	0.0404518
TXNL4A	0.0404341
DNAJC8	0.04041
CHCHD3	0.0403688
RBM41	0.040302
COG4	0.0402366
NANS	0.0401748
DAPK2	0.0401662
DPY19L3	0.0401532
COL23A1	0.0401226
ENSSSCG00000004446	0.0401176
TMEM126B	0.0399565
ZNF277	0.0399514
CELF1	0.0399494
PSMA6	0.039898
BRD2	0.0398606
UBE2B	0.0397708
BSDC1	0.0397625
ARHGAP26	0.0396937
NOP53	0.0396846
IRF1	0.0396812
ENSSSCG00000029251	0.0396629
INPP5K	0.0396054
RASSF1	0.0395853
ABHD16A	0.0395575
CAMK2G	0.0395094
STX7	0.0395029
ENSSSCG00000006395	0.0394796
PPP4R2	0.0394787
MOSPD3	0.0394694
TRAM1	0.0394647
CHPF2	0.0394015
NCOR1	0.0393751
ALDH16A1	0.039375
FAM160B1	0.0393195
MRPL40	0.0393175
OPTN	0.039283
EIF2B5	0.0392505
MAP2K3	0.0392355
TAF2	0.0391814
ND3	0.0391178
ENSSSCG00000010954	0.0390992
STK26	0.0390929
ATP5PO	0.03908
ERBIN	0.0390708
ASXL2	0.0390439
MAF	0.0390318
GNAI2	0.0388618
ENSSSCG00000031169	0.0387881
ENSSSCG00000038825	0.0387526
ENSSSCG00000017796	0.038715
PTGER2	0.0386123
TVP23C	0.0385675
ENSSSCG00000023126	0.0385457
DOCK10	0.0385374
ENSSSCG00000010158	0.0384764
MED6	0.0384447
ENSSSCG00000006260	0.0383855
PEF1	0.0383714
ENSSSCG00000016480	0.0383368
SNRPE	0.0383354
GPD1	0.0383104
ENSSSCG00000016262	0.0382988
ENSSSCG00000009851	0.0382964
ZC3H7A	0.038289
PTP4A1	0.0382805
SMIM19	0.0382691
PPP4C	0.0382548
ARIH2	0.0382486
ENSSSCG00000000638	0.0382211
TMEM11	0.0382183
ENSSSCG00000010674	0.0382041
LYST	0.0381381
ENSSSCG00000024776	0.0381292
HNRNPU	0.0381108
PDHB	0.0381028
CCND2	0.0380946
TNPO2	0.0380941
BAX	0.0380192
CLIP4	0.0379992
SESN2	0.0379936
NDUFS2	0.0379921
CYLD	0.0379851
RAB2A	0.0379515
WDR5	0.0379466
INTS11	0.0379441
RPN1	0.0379424
FLT3LG	0.0379395
CUTA	0.0379117
PRELID1	0.0379116
FH	0.0379008
WDR61	0.0378971
ATAD5	0.0378952
FAM161A	0.0378794
IFI44L	0.0378654
FKBP3	0.0378614
CREBZF	0.0378342
ENSSSCG00000006510	0.0377789
ENSSSCG00000014343	0.0377204
ENSSSCG00000009772	0.0376759
ADGRE5	0.0376758
DIABLO	0.037649
NDUFB10	0.0375711
ECHS1	0.0375543
EFTUD2	0.0375188
ETFA	0.0375149
POLE3	0.0374864
RPA1	0.0374505
ENSSSCG00000000365	0.0374481
TAF1D	0.0374231
DUSP6	0.0374219
NOP56	0.037413
ARHGEF3	0.037404
ENSSSCG00000013052	0.0373751
MAP1LC3A	0.0373373
SRRM2	0.0373289
HSPA9	0.037292
LAMP1	0.0372619
ENSSSCG00000009934	0.0372502
TMEM173	0.0372398
NENF	0.0371902
SEC23B	0.0371776
CKS2	0.0371266
RPIA	0.0370969
METTL27	0.0370483
EIF2S2	0.0370349
YPEL5	0.0370225
NAP1L4	0.0369763
CASP3	0.0369644
CDKN1B	0.0369497
PTK2B	0.036943
ENSSSCG00000023158	0.0368132
MAN1C1	0.0367964
RNASEH2B	0.0367582
RCC2	0.0367538
AGTRAP	0.0367456
TBC1D10A	0.0367243
MAPK6	0.0366956
FCGRT	0.036674
LY6E	0.0366098
DHX58	0.0365905
DDA1	0.0365622
CGAS	0.0365365
NDUFA6	0.036502
CRLF3	0.0364805
MOV10	0.0364677
CYCS	0.0363798
HSPA4	0.0363051
ENSSSCG00000009625	0.0363
CCR9	0.0362725
MRPL55	0.0362061
RBPMS	0.0361374
C15orf39	0.0361235
PLGRKT	0.036119
CHCHD5	0.0360707
CCNL1	0.0360296
LBH	0.0359818
STXBP2	0.0359776
GNL1	0.0359717
MID1IP1	0.0359638
CYTIP	0.035936
GNB2	0.0359266
CGGBP1	0.0359257
TBC1D2B	0.0359094
MRPL38	0.0359024
NAGK	0.0358686
ELOC	0.0358522
EXOC4	0.0358373
ENSSSCG00000009788	0.0358343
TNRC6C	0.0357809
TXNDC17	0.035719
PSKH1	0.0356881
ENSSSCG00000007743	0.0356873
TPST2	0.0356733
ATP5MC1	0.03562
ENSSSCG00000026064	0.0356079
UQCRC1	0.035565
MANEA	0.0355492
PTPN13	0.0355311
PSMA4	0.0355187
MOCOS	0.0355075
RALA	0.0354863
ZNHIT6	0.0354627
RFESD	0.035452
SIAH2	0.0354433
TGFB1	0.0354361
EMC7	0.0354127
HNRNPD	0.035392
MYO9B	0.0353497
UBA1	0.0353308
ENSSSCG00000021560	0.0353215
RRAGC	0.035281
HBEGF	0.035264
MIEN1	0.0352327
TOMM34	0.0352046
ATXN10	0.0351678
INO80C	0.0351523
ARGLU1	0.0351418
ITM2A	0.0351346
PSTPIP1	0.0350699
ENSSSCG00000035762	0.0350568
WDR26	0.0350531
RAB5C	0.0350521
CST3	0.0350472
NEDD8	0.0350274
GNPAT	0.0350181
COMMD4	0.0350132
ENSSSCG00000003219	0.0349912
TAP1	0.0349703
JMJD1C	0.0349324
RARG	0.0349065
ENSSSCG00000040849	0.0348205
SPPL2B	0.0347948
NOL8	0.0347653
TRA2A	0.0347622
PRKD3	0.0347592
PLIN2	0.0347576
ENSSSCG00000010734	0.0347458
RHOBTB1	0.0347339
ENSSSCG00000040248	0.0346849
RBM39	0.0346687
ENSSSCG00000023792	0.0346317
ENSSSCG00000040295	0.0346047
ATP5ME	0.0345778
RBMS1	0.0345584
ENSSSCG00000033068	0.0345521
ENSSSCG00000037143	0.0345201
CHIC2	0.0345133
KARS	0.0344733
ENSSSCG00000005656	0.034472
IL10RA	0.0344222
MED10	0.0344161
FADS3	0.034399
TESK2	0.0343927
SENP5	0.0343859
ALDH2	0.0343817
ENSSSCG00000001396	0.0343766
ENSSSCG00000000697	0.0343278
CDC14A	0.0342834
ATP5IF1	0.0342053
TNKS	0.0342
UBXN8	0.0341941
ENSSSCG00000001414	0.0341918
SMARCA5	0.0341522
JPT2	0.034147
NRROS	0.0341433
SSH1	0.0341162
ERAP2	0.0341102
RBM4	0.0341053
TOX4	0.034086
RASGRP2	0.0340705
CDKN2AIPNL	0.0340444
TMEM101	0.0340321
RAB28	0.034028
EIF4E2	0.0339957
ATG4A	0.0339545
PDCD5	0.0339364
TTC4	0.0339238
PAIP1	0.0338458
CSNK1G3	0.0338049
STAT1	0.0338031
ACIN1	0.0337933
VSIR	0.0337882
TMEM87B	0.0337792
PRDX4	0.0337564
ENSSSCG00000005135	0.0336848
RAP1GDS1	0.0336695
NUDT1	0.0336432
AP3B1	0.0336382
FMC1	0.0336262
SPC24	0.0336166
TIPRL	0.0335937
CEMIP2	0.0335502
ENSSSCG00000035617	0.0335405
OTULINL	0.0335299
MTA2	0.0335005
ILF2	0.03349
MISP3	0.033483
POGLUT1	0.0334075
PYGM	0.0333812
SETD3	0.0333112
ND5	0.0333083
SCAMP1	0.0333058
SH3GLB1	0.0332363
ENSSSCG00000006418	0.0332156
SLU7	0.0331418
GOLGA7	0.0331101
IDH2	0.0330488
ANXA7	0.0330234
ENSSSCG00000036491	0.0329996
ENSSSCG00000016100	0.0329894
NDUFS4	0.0329865
H2AFZ	0.0329088
NPRL2	0.032897
CTNNB1	0.032869
SLC38A2	0.0328674
NFE2L1	0.0328375
RNF139	0.0328197
PABPC1	0.0328159
RBM38	0.0328033
SDHC	0.032794
ENSSSCG00000010214	0.0327768
HSF4	0.032773
ENSSSCG00000016041	0.032722
NAA30	0.0327197
MED1	0.0326911
RNF216	0.0326836
FNBP1	0.0326673
ZYX	0.0326379
ENSSSCG00000012178	0.0326329
CCNI	0.0326258
PHB	0.0326132
CSDE1	0.03261
VPS16	0.0326086
CD38	0.0325967
EXOC6	0.0325873
SPOCK2	0.0324973
ATOX1	0.0324752
ENSSSCG00000035856	0.0324663
NABP1	0.0323857
AGAP3	0.0323794
SERPINF1	0.0323685
C21orf91	0.0323536
CSTF2T	0.0323448
LMBRD2	0.0323221
LBR	0.0323149
TMED9	0.0323043
ERP29	0.0322873
SASH3	0.0322444
GNA15	0.0322356
KLF3	0.032233
RNF181	0.0321938
RASSF4	0.0321191
RPS19BP1	0.0321122
RIOK3	0.0320091
CAB39	0.0319601
VCP	0.0319529
PPP1CB	0.0319477
HIGD2A	0.0319411
HSH2D	0.0319317
LMAN2	0.0319244
BCAP29	0.0319107
ADH5	0.0318609
ENSSSCG00000003849	0.0318403
NFYC	0.0318061
ENSSSCG00000010795	0.0318028
NDUFA11	0.0317757
NCBP2	0.0317501
ZFAND2B	0.0317305
ARHGAP30	0.0317207
C12orf10	0.0317141
ZNF395	0.0317054
UQCRQ	0.0316565
SMAD2	0.0316538
PCNX1	0.0316398
MMAB	0.0316232
ENSSSCG00000039635	0.031618
EIF2AK3	0.0316089
ATP6AP2	0.0316052
IRAK2	0.0315978
PPIH	0.0315728
IL10	0.0315476
GADD45B	0.031538
DCAF8	0.0315273
RBM42	0.0314975
SSR1	0.0314732
DCTN5	0.0314403
ZFAND5	0.0314156
UBASH3B	0.0313991
GATD1	0.0313677
ENSSSCG00000033987	0.0313571
ENSSSCG00000026140	0.0313168
MLF1	0.0312952
CSNK1A1	0.0312802
PABPN1	0.0312662
NME1	0.0312024
ENSSSCG00000013315	0.0311727
RER1	0.0311556
ENSSSCG00000007944	0.0311534
KDELR1	0.0311267
FBXO6	0.0311211
ENSSSCG00000020808	0.0311091
FGD4	0.0310742
ARF5	0.0310645
OARD1	0.0310515
OVCA2	0.0309966
RFXAP	0.0309938
RBX1	0.0309601
ENSSSCG00000005436	0.0309597
RFNG	0.0309519
GAB3	0.0309334
DNAJC17	0.0309268
GCHFR	0.0309185
BATF3	0.0308657
LIX1	0.0308563
SCAP	0.0308372
RNF138	0.0308279
ENSSSCG00000025499	0.0308
DNASE1L1	0.0307185
PORCN	0.0307126
UBE2K	0.0307064
POLR2F	0.030706
TNFAIP3	0.0306959
FLCN	0.0306833
ENSSSCG00000033572	0.0306789
MRPS31	0.0306688
SIGIRR	0.0306622
DNTTIP2	0.0306492
PACS2	0.030645
CENPH	0.0305903
ABCD2	0.0305871
ZBTB24	0.0305822
MCL1	0.0305806
ENSSSCG00000039582	0.0305774
SLC5A10	0.0305376
C18orf32	0.0305227
BPTF	0.0305202
PRKAG2	0.0305068
GPS1	0.0304883
KCNAB2	0.0304211
RHOC	0.0303902
LCP2	0.030387
ENSSSCG00000006376	0.0303709
CBX4	0.0303402
SEMA4A	0.0303365
CXCR4	0.0303321
FNTA	0.0303006
SMPDL3A	0.0302934
TBRG1	0.0302928
DRG1	0.030279
FHL3	0.0302688
SPEN	0.0302501
MRPL17	0.0302176
ENSSSCG00000037566	0.0301996
GYS1	0.0301969
STK4	0.0301767
RHEB	0.0301459
TSTD1	0.0300722
MRPL18	0.0300307
DHX29	0.0299853
ELL	0.0299828
SYNGR2	0.0299791
RBM8A	0.0299672
HMG20B	0.0299664
HP1BP3	0.0299649
ENSSSCG00000040294	0.0299327
CRADD	0.0299233
OXR1	0.0299199
BIN1	0.0298772
KAT7	0.0298762
CEBPG	0.0298373
CPD	0.0298239
ENSSSCG00000014280	0.0297758
ETS1	0.0297575
CENPU	0.0297517
UQCR10	0.0297328
UBLCP1	0.029727
CTSC	0.029721
ANXA11	0.0296901
KDSR	0.029637
MAGT1	0.0296341
MRPL34	0.0296253
RAB7A	0.0296208
ENSSSCG00000015434	0.0296116
RABGEF1	0.0295908
ATP5MD	0.0295675
EFCAB8	0.0295661
RPA2	0.0295646
RFX1	0.0295593
RUVBL1	0.0295025
ENSSSCG00000013721	0.0294956
CPNE2	0.0294706
ENSSSCG00000007688	0.0294597
ENSSSCG00000040857	0.0294501
PSME1	0.0294267
ENSSSCG00000004130	0.0294113
ACP1	0.0293919
ENSSSCG00000002898	0.0293914
ND4L	0.0293255
PRKAR1A	0.0292869
ENSSSCG00000040155	0.0292551
FOXN3	0.0292549
HDAC1	0.0292405
NELFB	0.0292243
GSE1	0.0292114
DDX39A	0.0291646
PPP2R5A	0.0291085
PRKACB	0.0290665
MIIP	0.0290309
ACTR2	0.029027
NFKB1	0.0289966
U2AF2	0.0289891
ENSSSCG00000037185	0.0289812
ZKSCAN1	0.0289805
STARD3NL	0.0289759
DALRD3	0.0289588
ITFG1	0.0289358
UBALD2	0.0288642
MTIF2	0.0288585
MRNIP	0.0288442
SLC25A3	0.0288325
SAMM50	0.0288255
TPPP3	0.0288167
UBAP2L	0.028792
SMC3	0.0287894
LHPP	0.028764
USF1	0.0287387
ARHGDIA	0.028735
ETFRF1	0.0287335
ATP6V1E1	0.0287015
ARHGAP9	0.0286754
ENSSSCG00000032459	0.028668
RNF214	0.028665
ZCWPW1	0.0286598
AKAP7	0.0286075
UBL4A	0.0285795
MRPL35	0.0285735
VWA7	0.0285481
TRIM23	0.0285125
ENSSSCG00000004963	0.0285076
SELENOF	0.0284599
ENSSSCG00000027565	0.0284398
SOX4	0.0284353
CYB5A	0.0284331
EXOC3	0.0284248
MRPL27	0.0284107
ILK	0.0283995
RUSC1	0.0283923
PSMC2	0.0283895
CLK1	0.0283843
HPF1	0.028338
CPPED1	0.0283132
SF3B1	0.0282794
JARID2	0.0282731
ENSSSCG00000033272	0.0282628
ANKMY2	0.0282627
ZNHIT1	0.0282298
SLA	0.0282236
ZNF655	0.0282001
PCMT1	0.0281927
SNRPF	0.0281695
BPHL	0.0281586
ST6GALNAC2	0.0281089
HIKESHI	0.0281014
TCP1	0.028099
EMC10	0.0280955
HECTD1	0.0280896
EML4	0.0280775
DPP7	0.0280507
UBE4A	0.0280456
PNKP	0.0280287
CITED2	0.028011
ENSSSCG00000034527	0.0280053
PIGV	0.027966
AHCY	0.0279576
DHX40	0.0279148
UBL3	0.0279137
MYO5A	0.0279079
SUN2	0.0278859
NAPRT	0.0278817
HBB	0.0278739
ENSSSCG00000002472	0.0278578
MRPS15	0.0278492
SNRPD1	0.0278393
ZNFX1	0.0278343
PPP2R2A	0.0278342
UBE2G2	0.027758
COMMD6	0.0277247
MTG2	0.0277171
TET2	0.0276709
DPYD	0.0276676
SH3BP2	0.0276425
WDR43	0.0276416
ENSSSCG00000014850	0.0276311
GGNBP2	0.027608
GEMIN2	0.0276039
ENSSSCG00000008576	0.0275734
ENSSSCG00000012757	0.0275611
ORMDL3	0.027549
PLIN3	0.0275473
UBR5	0.0275405
BRD3	0.0275348
EIF2A	0.0275108
OGA	0.0275044
C14orf119	0.0274989
PDCD1	0.0274945
TM9SF3	0.0274772
RLBP1	0.0274639
ARHGAP25	0.0274544
VPS26A	0.0274417
SLC25A39	0.0274378
SUDS3	0.0274142
TM2D1	0.0274078
ENSSSCG00000001696	0.0274013
ROCK2	0.0273744
RBPJ	0.0273679
ENSSSCG00000014371	0.0273524
UGDH	0.0273368
MAP3K1	0.0273257
MGST1	0.0273182
COQ9	0.0273087
CCDC189	0.0273028
DCTN3	0.027292
CNOT4	0.0272764
DUSP5	0.0272749
GHITM	0.027251
OSTM1	0.0272304
HNRNPM	0.0272129
ZNF146	0.0272085
ENSSSCG00000033744	0.027199
CDC37	0.0271868
RPL7L1	0.0271465
AMPD3	0.0271288
RSRC2	0.0271152
PDK1	0.0270902
RSBN1L	0.0270581
COX5A	0.0270419
PLEKHM2	0.0270275
SRSF4	0.0270198
ATP5F1D	0.0270193
ENSSSCG00000001252	0.0270033
MRPL24	0.0270028
TXK	0.0269939
HERC1	0.0269901
ENSSSCG00000009926	0.0269818
SOS1	0.0269687
ENSSSCG00000033212	0.0269606
UBE3B	0.0269272
HYAL2	0.026923
SMYD2	0.026915
MRPL21	0.0269093
IL9R	0.0269029
QKI	0.0268902
SRP54	0.0268699
ENSSSCG00000040827	0.026845
PRR7	0.0268433
PPP2CA	0.0268117
BRD4	0.0267899
RFX5	0.0267863
PGAM5	0.0267688
SDK1	0.026734
GON7	0.0267298
RHBDL2	0.0267295
COPS6	0.0267127
CCHCR1	0.0267003
CIAO2B	0.0266718
URI1	0.0266403
CEP170	0.0266298
SLC25A53	0.0266205
IARS2	0.0266114
G3BP1	0.0265954
SUGP2	0.0265856
PRPF38A	0.0265422
FIBP	0.0265143
UTP6	0.0264872
APOBEC3B	0.0264849
HIF1A	0.0264778
KIF5B	0.0264717
TRIM58	0.0264563
ENSSSCG00000040528	0.0264532
ZNF638	0.0264509
MORF4L1	0.0264495
GCC2	0.0264429
SC5D	0.0264133
DYRK1A	0.0263931
NDUFS3	0.0263634
PDIA3	0.0263629
ZFYVE27	0.0263536
DDX42	0.0263426
YPEL3	0.02634
ST6GALNAC4	0.026338
JOSD2	0.0263187
ENSSSCG00000000194	0.0263165
NPLOC4	0.0263046
SPRY1	0.026299
DPCD	0.0262822
TLN1	0.026249
IGFBP2	0.0262459
XPO1	0.0262424
CNOT7	0.0262367
DDX6	0.0262312
LSM7	0.0262124
ALMS1	0.0262085
TBL1XR1	0.0261999
SPCS1	0.0261989
CDIPT	0.0261751
ENSSSCG00000038711	0.0261738
ENSSSCG00000021427	0.0261429
PRDX5	0.0261156
RIC8B	0.0261144
ATP6V0C	0.0261041
HAUS2	0.0260925
CLK4	0.0260807
C7orf50	0.0260699
LIG3	0.0260691
FAM199X	0.0260573
ENSSSCG00000033700	0.0260471
ANGEL2	0.0260143
FNIP1	0.025963
ORC6	0.0258515
TRAF5	0.0258504
SNRPA1	0.0258502
2021-09-09	0.0258434
SMYD3	0.0258279
GSPT2	0.0258068
DENND1B	0.0258005
RB1CC1	0.0257797
PLEKHB2	0.0257669
HSP90AB1	0.0257667
TMEM14A	0.025764
ENSSSCG00000031073	0.025763
STAT3	0.0257606
PSMF1	0.0257466
HSDL2	0.0257432
ZNF688	0.025741
BCLAF1	0.0257306
UQCC1	0.0257186
PDK3	0.0257166
IMP4	0.0257038
THAP5	0.0257038
NXT1	0.0257012
TMEM242	0.0256894
ROCK1	0.0256602
TRAP1	0.0256574
MPI	0.0256426
ENG	0.0256308
PDE3B	0.0256272
BRWD1	0.0256234
CD84	0.0256194
GNB1	0.0256088
YWHAH	0.0255949
BCAS2	0.025578
NPY2R	0.0255369
TOMM7	0.0255333
ELOVL6	0.0255118
SMNDC1	0.0255019
PAK1IP1	0.0255009
NAA15	0.0254856
ABHD12	0.0254824
DYNC1H1	0.025476
YBEY	0.0254735
ENSSSCG00000010056	0.0254662
TRAPPC8	0.0254662
DTD2	0.0254538
NIPA2	0.0254399
ENSSSCG00000037364	0.025437
ENSSSCG00000036595	0.0254225
CAPRIN1	0.025415
MBIP	0.0254146
EMC4	0.0254125
ENSSSCG00000011121	0.0253496
ATP1A1	0.0253273
ENSSSCG00000001994	0.0253222
TRMT11	0.0253146
MRPS5	0.0253127
IPO5	0.0253121
ENSSSCG00000002743	0.0253103
OTUB1	0.0252984
HMOX2	0.0252961
HSPD1	0.0252829
NFYB	0.0252689
METTL26	0.0252646
ENSSSCG00000024313	0.0252477
ZNRF1	0.0252459
ACD	0.0252424
BBX	0.0252161
COMMD5	0.0251966
SSBP4	0.0251654
CDC123	0.0251579
RAB11FIP4	0.0251515
SNX2	0.0251395
PACS1	0.0250672
SH3BGRL	0.0250469
UFD1	0.0250459
FAM104A	0.0250376
ENSSSCG00000009341	0.0250286
TP53	0.0250176
KATNA1	0.0250119
NDUFAF1	0.0250101
PFKL	0.0249855
ZCCHC9	0.0249706
PLAA	0.0249686
BCL2L11	0.0249133
DUSP2	0.0249008
SLA2	0.0249
FAM78A	0.0248697
MZT1	0.0248687
ENSSSCG00000038506	0.0248678
UFM1	0.0248673
AKAP8L	0.0248217
VEZF1	0.024794
OSER1	0.0247735
ADRB2	0.0247646
ITGAE	0.0247261
DNAJB2	0.0247091
RPUSD1	0.0246982
DOCK11	0.0246885
ENSSSCG00000009293	0.0246774
GSTZ1	0.0246347
DAP3	0.0246341
TSTA3	0.0246109
DUSP28	0.0246085
NOB1	0.0246053
CD44	0.0245907
SFR1	0.0245711
PLEKHA2	0.0245608
ENSSSCG00000039217	0.02453
ENSSSCG00000026498	0.0245161
TRIP12	0.0244819
RALY	0.0244748
TIMM10	0.02444
ENSSSCG00000017213	0.0244334
NUDT5	0.024422
PPP1R12A	0.0244196
CASP8	0.0244187
LRRC42	0.0244065
OTUD5	0.0243777
ENSSSCG00000023324	0.0243771
FEZ2	0.0243696
RHOA	0.0243122
CREB3	0.0243098
SNX3	0.0242968
TMEM259	0.0242934
EMG1	0.0242707
ERMARD	0.0242548
UQCC2	0.0242547
PHF3	0.0242479
ITK	0.0242465
SOCS4	0.0242437
RBM12B	0.0242181
BIRC3	0.0242154
PPIG	0.0242151
ENSSSCG00000014013	0.0242138
CHRAC1	0.0242136
RAB35	0.024187
MAPK7	0.0241519
TCEAL1	0.024137
ZBTB37	0.0241281
CDK9	0.0241228
ENSSSCG00000034129	0.0241158
ENSSSCG00000008032	0.0240996
DDX52	0.0240992
PSMD14	0.0240822
TMED4	0.0240789
RRBP1	0.0240478
HDDC3	0.0240442
CCDC93	0.0239771
IRF2BP2	0.0239754
SLC25A5	0.0239424
REXO4	0.0239299
ZNRD2	0.0239152
ENSSSCG00000010172	0.0238854
DNAJC19	0.0238644
ST3GAL1	0.0238511
CACYBP	0.0238097
CDK5RAP3	0.0237861
TNPO1	0.0237845
ENSSSCG00000013038	0.0237609
ENSSSCG00000010104	0.0237548
NMD3	0.0237521
ENSSSCG00000003211	0.0237471
PICALM	0.0237361
ENSSSCG00000032599	0.0237279
TREX1	0.0237161
TYK2	0.0236924
CSNK1D	0.023682
CDC5L	0.0236653
IFI35	0.0236586
CAGE1	0.0236488
PHAX	0.0236299
RNF4	0.0236252
NUDC	0.0235758
DNAJB14	0.0235738
ADORA2A	0.0235468
ENSSSCG00000015687	0.0235409
ZNF292	0.0235203
C12orf75	0.0235013
SYF2	0.023483
VPS37B	0.0234822
HSBP1L1	0.0234789
TGFBR2	0.0234774
NAXE	0.0234739
SARNP	0.0234725
API5	0.0234628
ASAP1	0.0234558
GMPR2	0.0234483
ALPK3	0.0234212
UBE2J1	0.0234197
FBL	0.0234127
ENSSSCG00000037869	0.0234121
RIPK1	0.0234096
RCSD1	0.0234065
SAMHD1	0.0233857
HSD17B4	0.0233794
ENSSSCG00000016768	0.0233793
PARP14	0.0233676
GRAP2	0.0233566
AVL9	0.0233427
USF2	0.0233391
MRPS7	0.0233331
[truncated: 12,388 more rows]

## Sheet: 6v31_Permutation
Supplementary File 14. Random forest pair-wise analyses of CD2 ɣ𝛿 T-cell cluster. For each model represented below the porcine scRNA-seq cluster IDs compared are shown along with the parameters used and resulting OOB prediction error. Variable importance was assigned by measuring node impurity (Impurity) and using permutations (Permutation). Features that reduced error in predictive accuracy are …
Gene	Permutation
CCL5	0.0255148
ENSSSCG00000032017	0.0136437
GNLY	0.00883456
KLRK1	0.00876447
RHEX	0.00808937
NKG7	0.00630497
ENSSSCG00000036618	0.00599519
SRGN	0.0058523
GZMM	0.00465054
CD2	0.00463597
FCER1G	0.00444006
ENSSSCG00000016903	0.00442963
TRAT1	0.00399931
ENSSSCG00000026217	0.003666
ADGRG1	0.00364771
GPX1	0.00302309
CD8A	0.00262202
CX3CR1	0.00252951
CD244	0.00240567
TBX21	0.00235847
ID3	0.00233225
LCK	0.00230943
ENSSSCG00000000640	0.00224823
ANXA1	0.00211164
ENSSSCG00000012119	0.00179488
ENSSSCG00000024973	0.00167869
FAM49A	0.00155782
ID2	0.00153489
ITGA4	0.00152429
ENSSSCG00000008898	0.00142999
BATF	0.00142175
SEMA6D	0.00129825
S1PR5	0.00128838
IL2RB	0.00121114
RDX	0.00118362
GATA3	0.00116487
HLA.DRA	0.00103761
ENSSSCG00000023584	0.000996885
FGR	0.000993318
CD1D	0.000953334
SAMD3	0.000929634
BLK	0.000890957
PLEK	0.000888907
SLA.DQB1	0.000800094
SAMSN1	0.000773782
SELL	0.000765141
CD247	0.000731422
SNX10	0.000729626
PTPN22	0.000729161
TESC	0.000725072
ENSSSCG00000001455	0.000687433
ENSSSCG00000036114	0.000678145
FTL	0.000662715
PPP1CC	0.000654047
RPS16	0.000620112
GZMB	0.000616341
ARPC5L	0.000612031
RPS11	0.000608013
ENSSSCG00000000663	0.000606898
DUT	0.000602457
FSCN1	0.000570588
CTSW	0.000562499
ENSSSCG00000039658	0.000549736
PLEKHF2	0.000509014
CAPG	0.000498426
PLEKHF1	0.000468976
CST7	0.000461794
ENSSSCG00000034617	0.000455001
ITGAM	0.00045355
IKZF2	0.000450705
CAMK4	0.000450164
FCER1A	0.000423172
ENSSSCG00000014565	0.000422259
ENSSSCG00000003042	0.000420776
XCL1	0.000419019
ITM2B	0.000414036
SKAP2	0.000405829
BCAS4	0.000394861
TMEM123	0.000376488
NAPSA	0.00037487
LSP1	0.000365787
RPL34	0.000360609
IFI6	0.000359398
ENSSSCG00000006919	0.000349436
PRF1	0.000345019
ENSSSCG00000033721	0.000330572
RPS27	0.000330074
FLNA	0.000325009
YBX3	0.000312186
AOAH	0.000299117
ITGB1	0.00029198
PTPN12	0.000290836
EFHD2	0.000287765
ENSSSCG00000030300	0.000283048
COX1	0.000281185
UBAC2	0.000277662
EVL	0.000275629
CTSD	0.000274635
GPR55	0.000274023
ENSSSCG00000034914	0.000258913
COX3	0.000257229
ENSSSCG00000001456	0.000251104
ENSSSCG00000015447	0.000250553
SH2D1A	0.000249305
ACTG1	0.000246781
S100A10	0.000242953
CD74	0.000242534
ENSSSCG00000029596	0.000239635
CCR5	0.000233031
ITM2C	0.000226937
CYBRD1	0.000223362
RPS3A	0.000222174
ZNF683	0.000216726
ENSSSCG00000035224	0.000216254
GPR183	0.000211389
ENSSSCG00000009673	0.000207365
ZEB2	0.000192757
RPL22	0.000189541
ENSSSCG00000011272	0.000187967
EIF3I	0.000187183
ENSSSCG00000037187	0.000181685
PRDX3	0.00017497
CCSAP	0.00017462
ENSSSCG00000005095	0.000174374
ITGAL	0.000172991
KLHL8	0.000169384
ANXA2	0.000161261
ITGB2	0.000155966
SERPINB9	0.000152403
ENSSSCG00000004489	0.000151854
ABHD15	0.000150002
COTL1	0.000147415
PIK3R1	0.000147231
PRR5	0.000146688
TOX	0.000145761
TXNIP	0.000137512
RORA	0.000136782
ENSSSCG00000035080	0.000135814
ENSSSCG00000017749	0.000135262
KLRB1	0.000132591
STMN1	0.000132552
SUPT4H1	0.000127058
CCL3L1	0.000126141
IL6R	0.000119845
ENSSSCG00000033734	0.000117233
RPSA	0.000115285
RIN3	0.000115009
CRTAM	0.00011487
ARPC1B	0.000114059
B2M	0.000112401
RPS14	0.000112048
ENSSSCG00000003691	0.000111774
ENSSSCG00000035811	0.000111017
RHOQ	0.000110745
SIT1	0.000110586
CXCR3	0.000110545
HINT1	0.000109659
RAP1B	0.000109363
THEMIS2	0.000108719
SLC9A3R1	0.000107942
H2AFV	0.000103356
ENSSSCG00000031088	0.000103283
SLA.DMA	0.000101474
TYROBP	0.000100542
CD96	9.98141e-05
SPTBN1	9.89821e-05
PARK7	9.873e-05
DDX5	9.85263e-05
PCOLCE	9.83571e-05
SLC25A24	9.68241e-05
LPAR6	9.64377e-05
ENSSSCG00000035507	9.61567e-05
RPLP0	9.24971e-05
IFNG	9.24246e-05
ENSSSCG00000012916	9.21132e-05
CALHM6	9.14801e-05
UCP2	9.04619e-05
PIK3AP1	8.96091e-05
TPI1	8.92931e-05
TUBA1B	8.83297e-05
ENSSSCG00000013720	8.81822e-05
GPR37	8.78407e-05
S100A1	8.52917e-05
FGL2	8.52142e-05
SNTB2	8.379e-05
ND4	8.34256e-05
ENSSSCG00000021591	8.25647e-05
UPB1	8.22501e-05
ENSSSCG00000000576	8.19789e-05
RPL6	8.10887e-05
ENSSSCG00000016737	8.00844e-05
RPL35	8.008e-05
DUSP6	7.95242e-05
PNPLA6	7.84722e-05
ENSSSCG00000017032	7.84585e-05
GPR18	7.7671e-05
FUNDC1	7.75517e-05
LEF1	7.67511e-05
TCF7	7.65331e-05
PTP4A2	7.64629e-05
ARRB2	7.46627e-05
FAM89A	7.4551e-05
CA11	7.45148e-05
EOMES	7.41713e-05
RCAN3	7.37902e-05
FYB1	7.3609e-05
ENSSSCG00000034868	7.34294e-05
ISG20	7.29952e-05
ENSSSCG00000006156	7.05518e-05
HVCN1	7.05202e-05
ENSSSCG00000001407	7.02504e-05
ENSSSCG00000022912	6.95967e-05
HMGB2	6.67359e-05
PPP3CC	6.64477e-05
ENSSSCG00000003930	6.64464e-05
CCRL2	6.59505e-05
GRB2	6.59074e-05
JAKMIP1	6.49258e-05
LMO4	6.49176e-05
NFKBIA	6.46417e-05
RPS15	6.43832e-05
ENSSSCG00000015664	6.36734e-05
PLP2	6.35753e-05
ENSSSCG00000013597	6.3354e-05
EEF1B2	6.3231e-05
C15orf48	6.2318e-05
RPS13	6.22542e-05
ACTB	6.22237e-05
SPNS3	6.20391e-05
GBP2	5.97397e-05
S100A13	5.92842e-05
POLR1D	5.90728e-05
CD99	5.9035e-05
CCR3	5.89654e-05
OSBPL3	5.8655e-05
SLC1A5	5.75998e-05
ENSSSCG00000039071	5.73661e-05
PLAC8	5.57855e-05
ENSSSCG00000015710	5.57716e-05
IPO11	5.53854e-05
RPS23	5.53056e-05
CD52	5.51267e-05
MBOAT1	5.46809e-05
OAZ1	5.44342e-05
ENSSSCG00000031897	5.37138e-05
TUBB	5.27231e-05
RPL5	5.23826e-05
S100A6	5.23585e-05
PNRC1	5.20747e-05
ENSSSCG00000038507	5.19589e-05
PTPRC	5.19217e-05
CNBP	5.18993e-05
PTMA	5.16258e-05
ENSSSCG00000033019	5.1396e-05
KRAS	5.13749e-05
AIMP1	5.13495e-05
SEC61G	5.1192e-05
LTB	5.09479e-05
DNAJA1	5.04788e-05
TP53I13	5.01563e-05
TMEM71	5.01176e-05
ENSSSCG00000000636	4.9087e-05
ENSSSCG00000002907	4.89367e-05
S1PR1	4.88834e-05
RFX2	4.8536e-05
ANAPC13	4.8365e-05
SLAMF7	4.82311e-05
COX5B	4.80503e-05
ETS2	4.80461e-05
NDFIP1	4.80406e-05
SMIM19	4.79444e-05
RAB5A	4.78141e-05
ENSSSCG00000040273	4.76313e-05
TTF2	4.74251e-05
BRD2	4.73168e-05
RPS4X	4.6942e-05
BTG1	4.66469e-05
ENSSSCG00000031278	4.56096e-05
ENSSSCG00000027778	4.48165e-05
ENSSSCG00000036401	4.47231e-05
UBXN11	4.45771e-05
CCNG1	4.44774e-05
CASC1	4.44361e-05
CASS4	4.41222e-05
RASAL3	4.40996e-05
PRDX2	4.39731e-05
GTF2F2	4.38945e-05
TMA7	4.37025e-05
UBB	4.36662e-05
STK17B	4.3567e-05
LAT2	4.34854e-05
DYNLT3	4.34577e-05
CAPZB	4.3457e-05
VMP1	4.32166e-05
ENSSSCG00000003914	4.27277e-05
RPL37	4.20278e-05
ENSSSCG00000035520	4.16495e-05
FAM49B	4.16242e-05
RABAC1	4.11912e-05
PEA15	4.10957e-05
KXD1	4.10721e-05
IQGAP2	4.10407e-05
CD226	4.08499e-05
RETNLB	4.07022e-05
ENSSSCG00000037595	4.06561e-05
PTPN1	4.06452e-05
ENSSSCG00000011329	4.06239e-05
ENSSSCG00000006830	4.05904e-05
ST3GAL1	4.05784e-05
MRRF	4.04417e-05
CBLB	4.0431e-05
CCT3	4.04017e-05
PTH1R	4.03022e-05
NDUFS7	4.02339e-05
GYG1	4.0214e-05
TMSB10	4.02027e-05
CXXC5	4.01261e-05
ENSSSCG00000005453	3.99945e-05
HSPE1	3.99728e-05
MAF	3.99412e-05
ARPC3	3.98721e-05
GNA15	3.98496e-05
ZAP70	3.97195e-05
PTPRE	3.83046e-05
CELF1	3.76291e-05
FASLG	3.75648e-05
DDT	3.74427e-05
ZRANB2	3.74258e-05
ENSSSCG00000018063	3.72884e-05
LGALS1	3.7277e-05
CD47	3.71801e-05
ENSSSCG00000013661	3.71752e-05
GLIPR2	3.70512e-05
NANS	3.70439e-05
NDUFS8	3.70338e-05
ENSSSCG00000027046	3.69342e-05
UBE2J1	3.68742e-05
DMD	3.67892e-05
ENSSSCG00000034709	3.67871e-05
SRSF5	3.67673e-05
GPSM3	3.67276e-05
DAD1	3.66244e-05
RHOG	3.65658e-05
ENSSSCG00000037074	3.65416e-05
DHRS3	3.64284e-05
ENSSSCG00000020777	3.62489e-05
RASSF2	3.59629e-05
ZFP36L2	3.56274e-05
EMP1	3.40754e-05
SCAMP1	3.40379e-05
CFDP1	3.39538e-05
PNISR	3.3764e-05
IFITM3	3.36914e-05
GLUD1	3.36891e-05
IRF2	3.363e-05
ENSSSCG00000037081	3.36282e-05
ENSSSCG00000001341	3.34671e-05
ENSSSCG00000016902	3.34508e-05
ENSSSCG00000037566	3.34383e-05
SNRPC	3.34108e-05
MAP2K3	3.33254e-05
HNRNPH1	3.33162e-05
ENSSSCG00000001398	3.33077e-05
ACIN1	3.33e-05
GZMK	3.31482e-05
COX6A1	3.31423e-05
RNF7	3.29537e-05
TAX1BP1	3.29484e-05
COX6C	3.29214e-05
FUS	3.28608e-05
EDF1	3.24253e-05
PNRC2	3.19568e-05
ENSSSCG00000014855	3.07259e-05
HMCES	3.06026e-05
HACD4	3.04913e-05
EMB	3.02602e-05
TPMT	3.01981e-05
RPS18	3.01591e-05
MPZL3	3.01104e-05
LAT	3.00849e-05
ZNF831	3.00378e-05
RGS19	3.00312e-05
ENSSSCG00000033500	3.00164e-05
INTS11	2.99706e-05
RNF19A	2.9825e-05
FGD4	2.97204e-05
PPP1R18	2.97139e-05
RTF2	2.9675e-05
2021-09-01	2.96656e-05
ATXN7L3B	2.9664e-05
LPCAT2	2.96261e-05
RHOC	2.96253e-05
P2RY10	2.96041e-05
SRSF4	2.95612e-05
FNBP4	2.95203e-05
CD86	2.9513e-05
TNFRSF1B	2.95125e-05
SEC61B	2.94487e-05
ENSSSCG00000039635	2.93818e-05
TAGAP	2.93737e-05
PRDM1	2.93706e-05
TIMM13	2.93483e-05
EIF3H	2.93085e-05
TSC22D3	2.92207e-05
CEND1	2.92136e-05
ENSSSCG00000016758	2.91501e-05
LXN	2.90456e-05
NOP56	2.90348e-05
RRBP1	2.90339e-05
TPT1	2.89113e-05
RBPMS	2.88334e-05
ENSSSCG00000001063	2.87472e-05
ARHGEF3	2.87278e-05
ENSSSCG00000037885	2.85585e-05
LCP1	2.76399e-05
STARD4	2.6948e-05
PPP2R2A	2.66765e-05
ENSSSCG00000025928	2.66568e-05
PSMC3	2.66559e-05
ITGB7	2.64719e-05
MAN1C1	2.64468e-05
SESN2	2.64223e-05
ENSSSCG00000022176	2.63849e-05
FBXO39	2.63655e-05
CALCOCO2	2.62217e-05
RALA	2.61862e-05
ENSSSCG00000040529	2.61194e-05
PLAAT3	2.61102e-05
ENSSSCG00000036716	2.60917e-05
ENSSSCG00000013052	2.60482e-05
PAK2	2.60449e-05
SMC6	2.60132e-05
LAX1	2.59666e-05
BUB3	2.59388e-05
DHX29	2.59072e-05
ERH	2.58854e-05
ISYNA1	2.58745e-05
ENSSSCG00000008433	2.58423e-05
SOWAHD	2.58349e-05
SF3B6	2.58313e-05
ENSSSCG00000035162	2.5826e-05
PSTPIP2	2.5822e-05
SERTAD1	2.58218e-05
TIGIT	2.58117e-05
RPL23	2.58073e-05
CTNNB1	2.57991e-05
RPS26	2.57971e-05
CHMP4B	2.57871e-05
CD53	2.57617e-05
PSMA4	2.57182e-05
NME2	2.57056e-05
INPP5D	2.56881e-05
TMEM30A	2.56855e-05
RPL26	2.56084e-05
EGLN3	2.56074e-05
SSB	2.55092e-05
RPS20	2.54993e-05
FLI1	2.54581e-05
GTF3A	2.54543e-05
ENG	2.53558e-05
ZNF277	2.52976e-05
OSBPL8	2.52534e-05
ATP5F1C	2.52439e-05
BCAP31	2.51675e-05
BHLHE40	2.5161e-05
NDUFV3	2.51366e-05
ENSSSCG00000009303	2.5091e-05
GPBP1	2.48429e-05
PFDN2	2.47708e-05
TRMT112	2.38795e-05
ENSSSCG00000004963	2.35266e-05
SRSF10	2.30915e-05
ARFGAP3	2.29109e-05
THRAP3	2.29083e-05
GYPC	2.27674e-05
FMNL1	2.27351e-05
ENSSSCG00000007088	2.26957e-05
GPR171	2.26843e-05
SLC35E4	2.26702e-05
PPHLN1	2.26684e-05
RGS1	2.25987e-05
TESK2	2.25797e-05
RASA1	2.2556e-05
SEC62	2.25229e-05
PSIP1	2.24908e-05
SSR4	2.2489e-05
UBE2B	2.2483e-05
CDC42EP3	2.24802e-05
COX17	2.24754e-05
ENSSSCG00000005436	2.24714e-05
AP2S1	2.24573e-05
FAM162A	2.2436e-05
TMBIM6	2.24319e-05
TRAPPC5	2.24314e-05
H2AFZ	2.23889e-05
MPHOSPH8	2.23175e-05
TIAM1	2.23132e-05
ZC3H12D	2.23062e-05
SSRP1	2.22932e-05
POLE3	2.22789e-05
ATF4	2.22513e-05
ATP5F1A	2.22469e-05
ENSSSCG00000010320	2.22381e-05
SMCHD1	2.22374e-05
MRPL21	2.22312e-05
MED27	2.22131e-05
PTPRCAP	2.21889e-05
SMARCAL1	2.21804e-05
CCR9	2.21785e-05
ENSSSCG00000003520	2.21746e-05
REL	2.21711e-05
PSMB7	2.21482e-05
HIF1A	2.21414e-05
URM1	2.21362e-05
RNPS1	2.21169e-05
SKAP1	2.21075e-05
MAP4K4	2.20994e-05
LAPTM4A	2.20745e-05
SERPINF1	2.20743e-05
ENSSSCG00000040294	2.20602e-05
FAR2	2.20557e-05
DUSP1	2.20386e-05
MLLT10	2.20378e-05
RCHY1	2.20329e-05
NUMBL	2.20275e-05
TANGO2	2.1978e-05
ENSSSCG00000022246	2.19314e-05
NDUFV2	2.19205e-05
EZR	2.19204e-05
STXBP3	2.18829e-05
COL23A1	2.18785e-05
LRMP	2.18658e-05
ENSSSCG00000004414	2.17811e-05
ARFGEF1	2.17786e-05
RAB11A	2.1646e-05
CNPY2	2.16216e-05
SNU13	2.15695e-05
VPS28	2.14184e-05
FAS	2.13647e-05
ENSSSCG00000001979	2.12389e-05
ENSSSCG00000000657	2.11528e-05
ENSSSCG00000040528	1.96078e-05
RPL3	1.95305e-05
HSD17B4	1.92952e-05
ENSSSCG00000017509	1.91312e-05
PPP1CB	1.91159e-05
ENSSSCG00000039618	1.90476e-05
SH3BGRL3	1.901e-05
HSPB1	1.89925e-05
ATP5MC3	1.89547e-05
PRKCB	1.89449e-05
PPP1R12C	1.89293e-05
ENSSSCG00000036096	1.89071e-05
SLC25A53	1.89041e-05
AKAP7	1.88908e-05
ENSSSCG00000016262	1.88828e-05
RBL2	1.88421e-05
GMFG	1.88222e-05
DDX21	1.88029e-05
CREBZF	1.87771e-05
CD63	1.87726e-05
EIF4H	1.87705e-05
HDGF	1.87657e-05
ENSSSCG00000004307	1.87419e-05
PPIB	1.87303e-05
RPS5	1.87236e-05
CRADD	1.87213e-05
SIAH2	1.87195e-05
NR1D1	1.87086e-05
ENSSSCG00000036350	1.87059e-05
CEP170	1.86916e-05
MED11	1.86855e-05
ENSSSCG00000023126	1.86852e-05
ENSSSCG00000035869	1.86838e-05
BIN1	1.86707e-05
TOMM34	1.86519e-05
ENSSSCG00000015337	1.86462e-05
CASP8	1.86399e-05
CLIP4	1.86373e-05
FAM104A	1.86367e-05
SCAND1	1.86289e-05
PKM	1.85981e-05
ENSSSCG00000007688	1.85825e-05
USP5	1.85699e-05
ENSSSCG00000007552	1.85669e-05
BTF3	1.8558e-05
TMEM134	1.85562e-05
ENSSSCG00000010214	1.85529e-05
ZNF75D	1.85183e-05
EIF3E	1.85146e-05
SPOCK2	1.85058e-05
ENSSSCG00000033909	1.84797e-05
ATXN7L1	1.84709e-05
ENSSSCG00000009241	1.84675e-05
ARF4	1.84636e-05
ENSSSCG00000004441	1.84601e-05
CCDC186	1.84596e-05
CD3D	1.84502e-05
RPL17.C18orf32	1.84423e-05
MRPL24	1.84313e-05
ENSSSCG00000028479	1.84273e-05
ENSSSCG00000020790	1.84212e-05
NAPA	1.84165e-05
TMED5	1.83979e-05
IKZF1	1.83824e-05
TIMP1	1.83821e-05
ENSSSCG00000027826	1.83804e-05
RAB2A	1.83769e-05
LEPROTL1	1.83646e-05
HNRNPDL	1.83364e-05
ENSSSCG00000024500	1.83265e-05
CYTB	1.83261e-05
ARHGAP9	1.83155e-05
ENSSSCG00000034129	1.83154e-05
2021-09-07	1.83147e-05
NOL7	1.83121e-05
ATF6	1.83098e-05
ENSSSCG00000030295	1.83069e-05
ENSSSCG00000033987	1.83016e-05
EIF3D	1.82992e-05
HNRNPD	1.82897e-05
ENSSSCG00000035686	1.8283e-05
LIG3	1.82815e-05
ENSSSCG00000020830	1.82702e-05
UQCC1	1.82627e-05
KDSR	1.82602e-05
TBL1XR1	1.82548e-05
ZFP36L1	1.82505e-05
IL12RB2	1.8242e-05
SEMA7A	1.82387e-05
SRSF6	1.82373e-05
ENSSSCG00000015499	1.8213e-05
ENSSSCG00000027196	1.82037e-05
PDK1	1.82016e-05
CPNE1	1.81912e-05
SURF2	1.81896e-05
TP53	1.81702e-05
PVRIG	1.81424e-05
ORC6	1.81163e-05
EMP3	1.80947e-05
CCDC50	1.80633e-05
ARL4C	1.80276e-05
ATP5PB	1.80117e-05
BNIP3	1.79723e-05
ARID4A	1.79181e-05
MYO5A	1.78961e-05
ST6GALNAC4	1.779e-05
WDR1	1.77239e-05
DGKZ	1.77189e-05
XRCC6	1.75131e-05
TLE5	1.74698e-05
ATP6	1.59998e-05
MFHAS1	1.5534e-05
ND5	1.54761e-05
CYBA	1.54032e-05
ISG15	1.53846e-05
U2SURP	1.53609e-05
STAU1	1.53551e-05
ZFP36	1.5335e-05
ENSSSCG00000037475	1.52887e-05
TRAF3IP3	1.52845e-05
MAPRE2	1.52763e-05
ENSSSCG00000014094	1.52687e-05
RPL36AL	1.52125e-05
BAX	1.51682e-05
TRDC	1.51586e-05
ENSSSCG00000013596	1.51496e-05
NOP53	1.51237e-05
CALM3	1.50966e-05
COX7A2L	1.5096e-05
YWHAZ	1.50876e-05
SF3B5	1.50611e-05
ENSSSCG00000005768	1.50545e-05
YPEL5	1.50469e-05
PDCD1LG2	1.5038e-05
ENSSSCG00000028035	1.50376e-05
PTK2B	1.50347e-05
ENSSSCG00000007978	1.50235e-05
MRPL18	1.50113e-05
ENSSSCG00000026498	1.50095e-05
BUD13	1.50094e-05
ENSSSCG00000016451	1.50011e-05
ENSSSCG00000001994	1.49986e-05
CALM1	1.49885e-05
ENSSSCG00000035048	1.49855e-05
CCDC80	1.49819e-05
PREP	1.49813e-05
ENSSSCG00000039544	1.49739e-05
MOV10	1.49673e-05
ENSSSCG00000038711	1.49603e-05
ENSSSCG00000025593	1.49533e-05
SNRNP35	1.49468e-05
PPP6C	1.49458e-05
TFAM	1.49397e-05
FAM32A	1.49267e-05
NXT1	1.49118e-05
MAP2K2	1.49096e-05
ENSSSCG00000031172	1.49063e-05
CHD3	1.4905e-05
UBE3A	1.48978e-05
SEC61A1	1.48961e-05
CPM	1.48859e-05
NUDT1	1.48838e-05
KHDRBS1	1.48773e-05
RFX5	1.48772e-05
GPR34	1.48713e-05
LYN	1.48704e-05
ENSSSCG00000016323	1.48699e-05
BAIAP2L1	1.48699e-05
TMEM18	1.48699e-05
PARP16	1.48699e-05
CENPF	1.48699e-05
DPYD	1.48423e-05
OXA1L	1.48368e-05
CAPZA2	1.48344e-05
EXOC6	1.48156e-05
CARHSP1	1.48145e-05
RBM4	1.48076e-05
MRPL39	1.48011e-05
THYN1	1.47987e-05
RHOBTB1	1.4793e-05
COMMD6	1.4789e-05
CCT7	1.4788e-05
AKAP9	1.47779e-05
ENSSSCG00000032343	1.47747e-05
RPA3	1.4767e-05
APP	1.47534e-05
FCRL6	1.47532e-05
ENSSSCG00000030183	1.4733e-05
ENSSSCG00000000697	1.47309e-05
UTP4	1.47271e-05
GSPT2	1.47131e-05
OSTM1	1.47059e-05
DCP2	1.47059e-05
JPT2	1.47034e-05
DNAJB2	1.46947e-05
TMUB1	1.46872e-05
WAS	1.46844e-05
ACP1	1.4683e-05
PDCD5	1.4679e-05
PTP4A1	1.46789e-05
SNX12	1.46789e-05
FBXO6	1.46733e-05
ENSSSCG00000024950	1.46655e-05
UFD1	1.46614e-05
ZBTB7B	1.46593e-05
DBI	1.46492e-05
RABGAP1	1.46409e-05
STAG2	1.4639e-05
MAP1LC3B	1.46325e-05
UCHL1	1.46319e-05
PRKAR2B	1.46203e-05
SLC4A7	1.45985e-05
NDUFAF3	1.45891e-05
ARL6IP5	1.45877e-05
ENSSSCG00000006395	1.45863e-05
CLK1	1.45832e-05
AKR1A1	1.45786e-05
CRLF3	1.45731e-05
ATG12	1.45719e-05
MAP1LC3A	1.45709e-05
BRK1	1.45506e-05
VIM	1.45357e-05
STXBP2	1.45336e-05
ANKS3	1.45269e-05
CSNK1A1	1.45189e-05
ENSSSCG00000013260	1.45169e-05
TNFSF10	1.451e-05
ARHGAP27	1.44916e-05
NENF	1.44888e-05
SKA2	1.44777e-05
COPS2	1.44745e-05
ENSSSCG00000034896	1.44552e-05
GPX4	1.44492e-05
ENSSSCG00000014909	1.44483e-05
NME1	1.44348e-05
FAM83A	1.44309e-05
TMEM170A	1.44148e-05
DPM1	1.43863e-05
ZNF395	1.43685e-05
MYL6	1.43649e-05
ENSSSCG00000025060	1.43627e-05
C5orf24	1.43609e-05
EFCAB8	1.43531e-05
METRNL	1.43302e-05
PDCD10	1.43247e-05
MRPL40	1.43163e-05
RARG	1.43049e-05
NDUFC1	1.42602e-05
NOTCH1	1.42349e-05
EIF4A3	1.423e-05
ZNF207	1.42222e-05
POMP	1.42066e-05
TERF2IP	1.41764e-05
ATAD5	1.41593e-05
ALCAM	1.40074e-05
SOD1	1.3904e-05
SHISA5	1.25876e-05
ENSSSCG00000012517	1.21148e-05
PRKD3	1.18467e-05
KLF12	1.18343e-05
ENSSSCG00000040422	1.17713e-05
PIK3IP1	1.17665e-05
LPGAT1	1.16279e-05
TXNL1	1.16166e-05
PIK3R5	1.15479e-05
ENSSSCG00000035273	1.15387e-05
RABL3	1.15332e-05
LTA4H	1.14991e-05
NOLC1	1.14943e-05
MCM7	1.14943e-05
SMU1	1.14776e-05
CREB3L1	1.14286e-05
ENSSSCG00000016044	1.14286e-05
DNAJC13	1.1413e-05
TUT7	1.14114e-05
ENSSSCG00000034555	1.14068e-05
PYCARD	1.14056e-05
ENSSSCG00000037565	1.13951e-05
ENO1	1.1387e-05
CHPF2	1.13807e-05
BDH1	1.13799e-05
PNN	1.1378e-05
MRPL49	1.13636e-05
PIN1	1.13588e-05
SELENOF	1.13523e-05
YWHAQ	1.13498e-05
SEC11A	1.13407e-05
OAZ3	1.13252e-05
SNAPIN	1.13208e-05
UQCR10	1.13172e-05
ATP5MC1	1.13117e-05
FRYL	1.13112e-05
ACYP1	1.13109e-05
CPEB3	1.13107e-05
ENSSSCG00000032003	1.13009e-05
POC1A	1.12994e-05
ENSSSCG00000038900	1.12994e-05
ATP6V1G1	1.12975e-05
ENSSSCG00000016263	1.12871e-05
AGAP3	1.12857e-05
DHX9	1.12809e-05
ENSSSCG00000007944	1.12783e-05
BEX3	1.12782e-05
TRDMT1	1.12673e-05
ZNF580	1.12664e-05
RGS14	1.1257e-05
ANGPTL1	1.1257e-05
RNF13	1.1257e-05
PGAP2	1.1257e-05
UQCC2	1.1257e-05
CENPH	1.12556e-05
NDUFS2	1.12511e-05
ZNF251	1.12435e-05
MRPL57	1.1237e-05
ENSSSCG00000003664	1.1236e-05
FABP3	1.1236e-05
SMARCA2	1.12345e-05
HIKESHI	1.12321e-05
ARPC5	1.12307e-05
CCDC189	1.12298e-05
ENSSSCG00000005656	1.1226e-05
MRPL52	1.12221e-05
FAM78A	1.12215e-05
STRADB	1.12203e-05
TPM3	1.1218e-05
TAB2	1.1215e-05
PQLC2	1.1215e-05
CDIPT	1.12086e-05
CGGBP1	1.12081e-05
LYPLA2	1.11952e-05
KDELR1	1.11947e-05
EIF2S2	1.11943e-05
SLC25A6	1.11943e-05
PDLIM7	1.11936e-05
GON7	1.11876e-05
PRKAG2	1.11874e-05
IRF1	1.11831e-05
PPP1R12A	1.11758e-05
PGRMC1	1.11758e-05
APRT	1.11739e-05
C1orf74	1.11739e-05
CDC14A	1.11735e-05
PBDC1	1.11733e-05
ENSSSCG00000034092	1.11732e-05
HYPK	1.11706e-05
TMEM50B	1.11689e-05
ENSSSCG00000002996	1.11668e-05
RBM18	1.11665e-05
ENSSSCG00000017940	1.1164e-05
POLR2F	1.11618e-05
SHKBP1	1.11596e-05
ENSSSCG00000036988	1.1149e-05
RBM39	1.11469e-05
ENSSSCG00000010440	1.11461e-05
BAZ2A	1.11454e-05
RABGEF1	1.11417e-05
NDUFB9	1.11415e-05
ENSSSCG00000012811	1.11355e-05
ZNF692	1.11324e-05
URB2	1.1132e-05
RUNX1	1.11317e-05
ENSSSCG00000027085	1.11317e-05
CD5	1.11317e-05
CORO1C	1.11317e-05
UFSP2	1.11317e-05
PHTF1	1.11317e-05
ATF7IP	1.11317e-05
ITGA2B	1.11317e-05
FUT7	1.11317e-05
GTF3C6	1.11254e-05
RNF4	1.11251e-05
STAT3	1.11251e-05
WDR18	1.1125e-05
ENSSSCG00000038414	1.11249e-05
GABARAPL1	1.11236e-05
CYB5R1	1.11182e-05
RSL1D1	1.11175e-05
ATF7IP2	1.11144e-05
ENSSSCG00000027907	1.11134e-05
TMEM120A	1.1113e-05
SLC25A36	1.1113e-05
CNNM4	1.11118e-05
UBE3B	1.11118e-05
RSRP1	1.11112e-05
FMR1	1.11111e-05
USF3	1.11111e-05
EIF2S1	1.11111e-05
HILPDA	1.11111e-05
FHL3	1.11059e-05
ENSSSCG00000013568	1.11044e-05
SLC39A10	1.11016e-05
ZNF16	1.11004e-05
ACTR2	1.10991e-05
GNAI3	1.10982e-05
SRRM2	1.10944e-05
SMAD2	1.10909e-05
PLSCR1	1.10906e-05
MBOAT7	1.10906e-05
RNF145	1.10906e-05
ABHD12	1.10906e-05
TKT	1.10904e-05
TBCC	1.10838e-05
GOLGA4	1.1077e-05
KLF2	1.1076e-05
MOSPD3	1.10708e-05
RNF20	1.10701e-05
KMT2E	1.10662e-05
RAB35	1.10654e-05
FBXO4	1.10647e-05
TMPO	1.10633e-05
ELOA	1.10574e-05
METTL22	1.10565e-05
ZNFX1	1.10516e-05
TYMS	1.10509e-05
SPPL2B	1.10509e-05
HBEGF	1.10508e-05
PSMC1	1.10508e-05
ENSSSCG00000030197	1.10497e-05
TMEM94	1.10497e-05
ENSSSCG00000004082	1.10497e-05
ENSSSCG00000038757	1.10497e-05
ENSSSCG00000012046	1.10497e-05
SP3	1.10497e-05
SUPT20H	1.10497e-05
NOS2	1.10497e-05
ENSSSCG00000034448	1.10446e-05
ASNA1	1.10417e-05
IL12RB1	1.10406e-05
ENSSSCG00000003261	1.10383e-05
BCKDHB	1.10372e-05
RSF1	1.10321e-05
SPCS3	1.10306e-05
LMAN1	1.10294e-05
PSMD11	1.10294e-05
ENSSSCG00000002688	1.10273e-05
ST3GAL5	1.10271e-05
PLEKHM2	1.10257e-05
RMND5B	1.10237e-05
ATP5MD	1.10213e-05
RNH1	1.10203e-05
ENSSSCG00000039740	1.10191e-05
DDX46	1.10172e-05
ATP6AP1	1.10163e-05
ENSSSCG00000008576	1.10155e-05
CNN2	1.10092e-05
KATNA1	1.10088e-05
PDZD11	1.10054e-05
ATP5ME	1.10028e-05
ZNHIT1	1.10027e-05
WDR5	1.09996e-05
DDX27	1.09978e-05
ENSSSCG00000015814	1.09974e-05
DHX40	1.09937e-05
CAMLG	1.09927e-05
LRCH4	1.09899e-05
ZNF710	1.0989e-05
MCM2	1.09871e-05
CCT4	1.09834e-05
LRCH3	1.09825e-05
DPY30	1.09823e-05
FKBP11	1.09805e-05
MGAT4A	1.09735e-05
TCIRG1	1.09689e-05
HNRNPR	1.09638e-05
CUTA	1.09614e-05
RPN2	1.09578e-05
SMIM20	1.09516e-05
TLN1	1.09489e-05
VPS26A	1.09489e-05
CYTIP	1.09444e-05
ENSSSCG00000003211	1.09438e-05
LYSMD2	1.09335e-05
LYAR	1.09324e-05
ENSSSCG00000027689	1.0929e-05
MRPL35	1.0929e-05
MDFIC	1.0929e-05
GTPBP4	1.09285e-05
RANBP1	1.09223e-05
ENSSSCG00000031169	1.09192e-05
ACTR6	1.09168e-05
THEMIS	1.09158e-05
ACADSB	1.09157e-05
ENSSSCG00000012523	1.09091e-05
HIST1H2AB	1.09091e-05
PLAA	1.08992e-05
ELOC	1.08974e-05
SUMO2	1.08897e-05
IFI44L	1.08894e-05
SGTA	1.08893e-05
D2HGDH	1.08893e-05
DNTTIP2	1.08893e-05
ENSSSCG00000030801	1.08893e-05
GRAP2	1.08893e-05
TIA1	1.08855e-05
IRF2BP2	1.08849e-05
ND4L	1.08831e-05
SLC25A4	1.08825e-05
ME2	1.08792e-05
CHCHD5	1.08688e-05
ENSSSCG00000039473	1.0863e-05
PPP2R5A	1.08602e-05
ESF1	1.08572e-05
AURKC	1.08568e-05
HBB	1.08499e-05
SMIM7	1.08476e-05
VAPA	1.08401e-05
ENSSSCG00000024974	1.08374e-05
PLEKHA2	1.08348e-05
CSGALNACT2	1.08321e-05
RAF1	1.08186e-05
ENSSSCG00000009934	1.08163e-05
ALDH2	1.08161e-05
ENSSSCG00000013436	1.08158e-05
MAGT1	1.08143e-05
KMO	1.08134e-05
SASH3	1.08114e-05
DCAF6	1.08108e-05
NCR1	1.08108e-05
ENSSSCG00000029160	1.08048e-05
MID1IP1	1.08047e-05
ENSSSCG00000015011	1.0798e-05
ENSSSCG00000039538	1.07931e-05
ABRAXAS2	1.07914e-05
ZFR	1.07914e-05
CFL1	1.07873e-05
CTSO	1.0772e-05
SUCLG1	1.0772e-05
ACOT8	1.07659e-05
PFKL	1.07447e-05
SSBP4	1.07418e-05
TRAF5	1.07391e-05
CCND2	1.07335e-05
ORC2	1.07335e-05
C4orf48	1.07335e-05
FAM207A	1.07335e-05
ENSSSCG00000027573	1.07292e-05
ENSSSCG00000014267	1.07244e-05
EVI2B	1.07093e-05
FNDC3A	1.06952e-05
ENSSSCG00000017146	1.0686e-05
CCNL1	1.06829e-05
RRAGD	1.06762e-05
AGO2	1.06762e-05
ENSSSCG00000027840	1.06539e-05
NT5DC2	1.06394e-05
RABEP1	1.06383e-05
BDH2	1.06211e-05
ENSSSCG00000039807	1.06195e-05
ENSSSCG00000009341	1.06007e-05
ENSSSCG00000027348	1.05948e-05
URI1	1.05449e-05
TNRC6B	1.04979e-05
TNFSF14	1.02388e-05
ATP5PF	1.00178e-05
RAC2	9.18275e-06
ABI1	8.74995e-06
RPL27	8.44282e-06
HMGN3	8.28353e-06
RPL11	8.25278e-06
PAFAH1B3	8.15444e-06
ENSSSCG00000035768	8.12529e-06
ENSSSCG00000028485	8.09986e-06
LENG8	7.9816e-06
MAX	7.97882e-06
INTS6	7.85167e-06
RTF1	7.83959e-06
RTRAF	7.81592e-06
EIF3K	7.8159e-06
GPD1	7.8033e-06
ENSSSCG00000034072	7.80141e-06
FERMT3	7.79701e-06
PPIH	7.7914e-06
HSH2D	7.78368e-06
TMEM186	7.7821e-06
TMEM131	7.77268e-06
NDUFB10	7.76146e-06
CDK5RAP3	7.72201e-06
BIN2	7.71438e-06
SGK1	7.70713e-06
SLC39A9	7.70713e-06
CLBA1	7.70713e-06
ENSSSCG00000027746	7.70402e-06
RBX1	7.70149e-06
MCL1	7.69972e-06
KIF21B	7.69413e-06
CD38	7.69301e-06
ENSSSCG00000016768	7.69231e-06
RNASEH2A	7.69231e-06
CSNK1G2	7.68867e-06
HACD2	7.68498e-06
HADHB	7.68277e-06
SFT2D2	7.67754e-06
CDC42SE2	7.66977e-06
TMEM192	7.66809e-06
ENSSSCG00000039217	7.66445e-06
ENSSSCG00000012166	7.66367e-06
HMGN2	7.66354e-06
PDE4D	7.66284e-06
RPS10.NUDT3	7.6563e-06
CPNE2	7.65556e-06
MUS81	7.65535e-06
CAGE1	7.64675e-06
TNFAIP8	7.64194e-06
SMPDL3A	7.62665e-06
PSMA6	7.62468e-06
RPL10	7.62212e-06
TMCC1	7.61905e-06
NADSYN1	7.61905e-06
ENSSSCG00000008035	7.61905e-06
PSMD12	7.61905e-06
DAZAP2	7.61905e-06
DNAJC8	7.61405e-06
SERP1	7.60852e-06
FAM76A	7.60456e-06
RFX3	7.60456e-06
CCDC97	7.60456e-06
SART3	7.60108e-06
DPF2	7.59013e-06
PTPRJ	7.59013e-06
ENSSSCG00000009772	7.5887e-06
CAPRIN1	7.5872e-06
COA3	7.58563e-06
RASSF1	7.58348e-06
SUDS3	7.57796e-06
NAA30	7.57576e-06
ENSSSCG00000003771	7.57576e-06
EIF6	7.57392e-06
LMBR1	7.56914e-06
ALDH1A3	7.56168e-06
RANBP3	7.56144e-06
GSDMD	7.56144e-06
CA5B	7.56144e-06
TDP2	7.56144e-06
RAB19	7.56144e-06
LAMP2	7.55463e-06
NUDC	7.55463e-06
SLC9A7	7.54898e-06
GSTO1	7.54849e-06
POLR2E	7.54728e-06
ERO1B	7.54717e-06
TMEM9B	7.54717e-06
EBAG9	7.54717e-06
EXOC8	7.54022e-06
ENSSSCG00000000638	7.5332e-06
GTF2F1	7.53296e-06
PPP2R5C	7.53296e-06
NSD3	7.53185e-06
ARRB1	7.52969e-06
SLC9A3R2	7.527e-06
GALK1	7.52668e-06
DHRS7B	7.5262e-06
SUCLG2	7.52538e-06
USP11	7.52262e-06
AICDA	7.52145e-06
DAPK2	7.52145e-06
SDF4	7.51904e-06
FAM102A	7.5188e-06
CWF19L1	7.5188e-06
AHR	7.5188e-06
SLC10A7	7.5188e-06
AACS	7.5188e-06
ENSSSCG00000027988	7.5188e-06
ZSCAN2	7.5188e-06
NUP85	7.5188e-06
ITPK1	7.51731e-06
TMEM101	7.51704e-06
ENSSSCG00000025305	7.51227e-06
MRPL20	7.51225e-06
RSBN1L	7.51064e-06
TERF1	7.5103e-06
RUVBL1	7.50749e-06
CD6	7.50703e-06
RBM12B	7.50493e-06
USP1	7.50469e-06
MRNIP	7.50469e-06
TM6SF1	7.50469e-06
C15orf39	7.50469e-06
TNFSF11	7.50469e-06
RARA	7.50469e-06
ARL6IP1	7.50246e-06
UCHL5	7.49719e-06
PCBD2	7.49492e-06
BOD1L1	7.49442e-06
TMEM160	7.49192e-06
FBXO30	7.49064e-06
ENSSSCG00000005663	7.49064e-06
NDUFS3	7.49064e-06
ADRB2	7.49064e-06
ENSSSCG00000039368	7.49064e-06
PGPEP1	7.48993e-06
NCL	7.48802e-06
COG4	7.48772e-06
VARS	7.48416e-06
SCAMP5	7.48416e-06
GTF3C2	7.48379e-06
ENSSSCG00000017626	7.4783e-06
SUSD3	7.47749e-06
ENSSSCG00000031871	7.47687e-06
LDLR	7.47674e-06
ENSSSCG00000013042	7.47664e-06
COX15	7.47664e-06
KIF3C	7.47664e-06
ASH1L	7.47664e-06
NXT2	7.47664e-06
MECP2	7.47664e-06
EIF2B2	7.47664e-06
STRAP	7.47664e-06
RSU1	7.47664e-06
NEMF	7.47664e-06
RIF1	7.47664e-06
MTCH1	7.47664e-06
TST	7.47664e-06
ENSSSCG00000003885	7.47656e-06
MICOS10	7.47293e-06
UBE4A	7.4709e-06
ENSSSCG00000026055	7.47076e-06
FAM234B	7.46997e-06
SARNP	7.46966e-06
TES	7.46957e-06
EEF1AKNMT	7.4691e-06
SLC25A5	7.46833e-06
CCS	7.46292e-06
KDM4C	7.46269e-06
HTATIP2	7.46269e-06
SBNO1	7.46269e-06
PDE6D	7.46269e-06
ENSSSCG00000027723	7.46269e-06
PLA2G4A	7.46269e-06
LARP7	7.46269e-06
ZNF484	7.46269e-06
COPZ1	7.46269e-06
DENND5A	7.46269e-06
PI4K2B	7.46269e-06
TIMM8B	7.45681e-06
AKNA	7.44944e-06
CWC15	7.44902e-06
ENSSSCG00000034185	7.44889e-06
TRIM37	7.44889e-06
CISH	7.44879e-06
KLK7	7.44879e-06
MAP3K11	7.44879e-06
TOR1AIP1	7.44879e-06
AUP1	7.44879e-06
ZNF182	7.44879e-06
PAN3	7.44879e-06
ENTPD6	7.44879e-06
GYS1	7.44805e-06
KHDC4	7.44423e-06
TRADD	7.44218e-06
ENSSSCG00000009926	7.43661e-06
PAIP1	7.43589e-06
NDUFB11	7.43559e-06
PUM3	7.43494e-06
DNAJA2	7.43494e-06
ENSSSCG00000036658	7.43494e-06
TRMT61B	7.43494e-06
PI4KB	7.43494e-06
TRMT13	7.43494e-06
ENSSSCG00000032768	7.43494e-06
ARFGAP1	7.43494e-06
FAM43A	7.4311e-06
IRF3	7.43035e-06
ENSSSCG00000011234	7.42805e-06
PABPC1	7.42508e-06
ENSSSCG00000016212	7.42397e-06
RIN2	7.4226e-06
LYST	7.42176e-06
SMARCE1	7.42156e-06
ENSSSCG00000012178	7.42123e-06
ENSSSCG00000033918	7.42118e-06
FAM234A	7.42115e-06
ENSSSCG00000005841	7.42115e-06
HSF2	7.42115e-06
TMEM179B	7.42115e-06
CASTOR1	7.42115e-06
RRN3	7.42115e-06
ENSSSCG00000020808	7.42115e-06
PDK3	7.42115e-06
TNFRSF1A	7.42115e-06
ACSF2	7.42115e-06
PECR	7.41706e-06
PRMT2	7.41458e-06
CCHCR1	7.41433e-06
SEC61A2	7.41428e-06
LHPP	7.41122e-06
NAA15	7.40924e-06
PRR7	7.40804e-06
MRPS7	7.40804e-06
DTX3L	7.40804e-06
ENSSSCG00000001097	7.40751e-06
RALGAPA2	7.40741e-06
KIF2A	7.40741e-06
ENSSSCG00000040155	7.40713e-06
CEBPZ	7.40383e-06
ROMO1	7.40163e-06
PREB	7.40071e-06
ITPRIPL2	7.40061e-06
DPY19L3	7.40061e-06
ENSSSCG00000030015	7.39677e-06
PGLYRP2	7.39462e-06
IFT122	7.39372e-06
HIRA	7.39372e-06
RTN4IP1	7.39372e-06
ENSSSCG00000030578	7.39372e-06
FAM118A	7.39372e-06
PSTK	7.39339e-06
GNG2	7.39321e-06
ENSSSCG00000003348	7.38767e-06
ADCK5	7.38694e-06
CAPN15	7.385e-06
TGFBR2	7.38315e-06
TRIM4	7.38131e-06
AHI1	7.3801e-06
MRTFA	7.38007e-06
TBK1	7.38007e-06
ZBTB48	7.38007e-06
ENSSSCG00000040974	7.38007e-06
TRAPPC4	7.38007e-06
BAZ1B	7.38007e-06
CPSF3	7.38007e-06
PDGFB	7.38007e-06
NECAP1	7.38007e-06
SRP68	7.38007e-06
ENSSSCG00000037071	7.37468e-06
TOPBP1	7.37378e-06
GPR108	7.37333e-06
SEC31A	7.37008e-06
ENSSSCG00000000611	7.36851e-06
CTSA	7.36851e-06
FAM210B	7.36734e-06
SPAG8	7.36656e-06
GRSF1	7.36648e-06
OLFM1	7.36648e-06
TIMM10	7.36648e-06
ENSSSCG00000014031	7.36648e-06
ENSSSCG00000032073	7.36648e-06
SEC24D	7.36648e-06
ENSSSCG00000026653	7.36648e-06
AMMECR1	7.36648e-06
NUP50	7.36648e-06
ENSSSCG00000014569	7.3651e-06
FAM126A	7.36481e-06
CAMK2G	7.36457e-06
CTNNBL1	7.36425e-06
GTPBP8	7.36046e-06
LCP2	7.35954e-06
RBM17	7.35925e-06
EFTUD2	7.35381e-06
ENSSSCG00000013650	7.35316e-06
SWAP70	7.35316e-06
DCP1A	7.35294e-06
VCL	7.35294e-06
YOD1	7.35294e-06
TAF2	7.35294e-06
MTMR6	7.35294e-06
GOLM1	7.35294e-06
TM9SF3	7.34798e-06
WDR46	7.34754e-06
ESYT2	7.34649e-06
CASP1	7.34634e-06
NDUFAF1	7.34309e-06
ASB9	7.33945e-06
UBASH3A	7.33945e-06
FUCA1	7.33945e-06
AGO3	7.33945e-06
ENSSSCG00000037341	7.33945e-06
TRMT1	7.33945e-06
NUP35	7.33945e-06
SNTB1	7.33945e-06
ABHD2	7.33945e-06
TACO1	7.33945e-06
ST7	7.33945e-06
PEF1	7.33945e-06
ENSSSCG00000022963	7.33945e-06
ENSSSCG00000024163	7.33945e-06
ABCB7	7.33945e-06
BCAP29	7.3327e-06
ENSSSCG00000038825	7.33035e-06
NUDT21	7.32866e-06
GOLGA1	7.32721e-06
PAIP2	7.32704e-06
TOMM40	7.32689e-06
NUP160	7.32603e-06
KDM5D	7.32601e-06
TSC22D4	7.32367e-06
RRP15	7.3198e-06
NSMF	7.31926e-06
COX4I1	7.31557e-06
ANKRD12	7.31506e-06
PIK3CG	7.31389e-06
SCG5	7.31323e-06
MED7	7.31261e-06
FBH1	7.31261e-06
TNFRSF11A	7.31261e-06
TLNRD1	7.31261e-06
RIC8B	7.31261e-06
RBM8A	7.31106e-06
TBCB	7.31038e-06
NT5C2	7.30715e-06
UPP1	7.30623e-06
MRPS18B	7.30594e-06
CUEDC2	7.30502e-06
SMARCA4	7.30474e-06
ENSSSCG00000036257	7.30375e-06
COMMD1	7.30083e-06
TMEM173	7.30037e-06
TPP1	7.29927e-06
ENSSSCG00000011077	7.29927e-06
PLAGL2	7.29927e-06
C21orf91	7.29927e-06
GOT2	7.29927e-06
PSMD13	7.29927e-06
ETF1	7.29927e-06
WDR33	7.29927e-06
TMEM41B	7.29927e-06
DHX15	7.29927e-06
PBX2	7.29927e-06
C5orf22	7.29927e-06
KIF5B	7.29927e-06
CBX4	7.29814e-06
TIMM22	7.29142e-06
ZNF512B	7.28839e-06
ENSSSCG00000020402	7.28619e-06
HSBP1L1	7.28607e-06
CHRAC1	7.286e-06
ENSSSCG00000004392	7.28597e-06
ENSSSCG00000039972	7.28597e-06
PPP2R1A	7.28597e-06
PRXL2B	7.28597e-06
SYNGR2	7.28597e-06
ENSSSCG00000035522	7.28591e-06
COX6A2	7.28442e-06
PSMC5	7.28311e-06
EIF3A	7.28105e-06
KRTCAP2	7.28005e-06
ENSSSCG00000031288	7.2794e-06
ARL1	7.27935e-06
SLCO3A1	7.27814e-06
ADRM1	7.27564e-06
CSRNP2	7.27525e-06
NAA40	7.27497e-06
RNF115	7.27468e-06
PRR5L	7.27359e-06
KLHL26	7.27294e-06
NUCB1	7.27273e-06
TMEM258	7.27273e-06
PSAP	7.27273e-06
CYHR1	7.27273e-06
DDX3X	7.27273e-06
KIAA0930	7.27273e-06
GIMAP8	7.27273e-06
ENSSSCG00000038581	7.26929e-06
PCBP2	7.26772e-06
ITFG1	7.26747e-06
DHX58	7.26613e-06
NUDT5	7.26297e-06
FLCN	7.26192e-06
DNAJB14	7.25953e-06
PTRH2	7.25953e-06
NLK	7.25953e-06
STRN	7.253e-06
BUD31	7.25149e-06
FAM222B	7.24792e-06
ENSSSCG00000007355	7.2474e-06
RPL39	7.24706e-06
PRMT1	7.24659e-06
RXRA	7.24638e-06
EIF4G3	7.24638e-06
PCBD1	7.24638e-06
AP1S1	7.24638e-06
VARS2	7.24638e-06
ARHGEF7	7.24638e-06
PIGN	7.2403e-06
NCBP2	7.2403e-06
MOB3A	7.2356e-06
LANCL1	7.23327e-06
APH1A	7.23327e-06
NAT9	7.23327e-06
ENSSSCG00000039056	7.23327e-06
ENSSSCG00000016711	7.22822e-06
XPO5	7.22679e-06
AHCY	7.2266e-06
AP3B1	7.22625e-06
SLC25A3	7.22417e-06
NEDD8	7.21757e-06
GOLPH3L	7.21629e-06
FYTTD1	7.20721e-06
PSMB6	7.20721e-06
NDEL1	7.20721e-06
PAFAH2	7.20073e-06
SF3B1	7.19799e-06
ENSSSCG00000029627	7.19424e-06
HSF4	7.19424e-06
SYAP1	7.19254e-06
COX7B	7.18725e-06
ENSSSCG00000008061	7.18594e-06
ENSSSCG00000037143	7.18397e-06
ADAT3	7.18133e-06
ENSSSCG00000013232	7.18078e-06
SNRPA1	7.1752e-06
FNTA	7.17233e-06
TUBB2B	7.16508e-06
SMARCD1	7.15564e-06
CDKN1B	7.15564e-06
HMMR	7.15564e-06
ENSSSCG00000013435	7.14288e-06
ENSSSCG00000031152	7.14288e-06
ARL14EP	7.14286e-06
MTDH	7.14286e-06
NDUFB7	7.14261e-06
SFT2D1	7.13846e-06
ENSSSCG00000037364	7.13276e-06
ATP5MC2	7.13271e-06
MYDGF	7.13012e-06
ENSSSCG00000036483	7.13012e-06
RNF181	7.13012e-06
ENSSSCG00000031166	7.13012e-06
FAM129A	7.11744e-06
MDH1	7.11744e-06
DYRK2	7.11744e-06
JARID2	7.11351e-06
ENSSSCG00000014280	7.11116e-06
ENSSSCG00000032459	7.1048e-06
GNAI2	7.09616e-06
ENSSSCG00000000071	7.09256e-06
NMD3	7.0922e-06
KRR1	7.08501e-06
PTCD2	7.07965e-06
ZMYM6	7.06714e-06
ZNF146	7.04225e-06
ENSSSCG00000036379	7.04225e-06
LRP10	7.04102e-06
ADD3	7.03892e-06
DAPL1	7.03522e-06
ENSSSCG00000002898	7.02184e-06
QARS	7.01754e-06
EMC10	7.01754e-06
H3F3A	7.00105e-06
BCCIP	6.99737e-06
ENSSSCG00000000635	6.99179e-06
SELENOT	6.98677e-06
CST3	6.98537e-06
RESF1	6.83989e-06
DDA1	6.83656e-06
RPS6	6.82957e-06
ADH5	6.8167e-06
UBLCP1	6.79041e-06
ENSSSCG00000017248	6.75554e-06
ENSSSCG00000027790	6.42415e-06
HSD11B1L	4.91405e-06
LITAF	4.36517e-06
RAP2C	4.18173e-06
RALY	4.18018e-06
ND1	4.17557e-06
CCND3	4.17416e-06
ATP5PO	4.17276e-06
ENSSSCG00000001779	4.15954e-06
MRPL55	4.14107e-06
ZCCHC7	4.09049e-06
STMN3	4.07964e-06
MED8	4.06537e-06
DDOST	4.06383e-06
MDH2	4.05647e-06
UBXN4	4.04249e-06
DCTN3	4.03565e-06
BPHL	4.03066e-06
C7orf50	4.02994e-06
ARGLU1	4.02344e-06
PPP4R3B	4.01093e-06
ENSSSCG00000037030	4.00331e-06
FUNDC2	3.99526e-06
MTA2	3.98972e-06
CAMTA2	3.95924e-06
CD37	3.9583e-06
ENSSSCG00000035256	3.95007e-06
BLOC1S5	3.94477e-06
MAPK7	3.94002e-06
ENSSSCG00000032552	3.93701e-06
ENSSSCG00000003849	3.92927e-06
SELENOP	3.92658e-06
TGIF1	3.92267e-06
CMIP	3.92157e-06
PAMR1	3.92157e-06
MXI1	3.92157e-06
CCT5	3.91735e-06
SPC24	3.90625e-06
OARD1	3.90421e-06
UQCRC1	3.9017e-06
ECHS1	3.89753e-06
CFAP54	3.89105e-06
ENSSSCG00000024419	3.8835e-06
AGPAT5	3.8835e-06
PPIG	3.87951e-06
STX7	3.87597e-06
CENPW	3.87597e-06
PIGV	3.87597e-06
NCOR2	3.87597e-06
ANXA4	3.87597e-06
LACTB2	3.87597e-06
MAP3K12	3.87597e-06
PFDN4	3.87597e-06
DYNLL2	3.87597e-06
ROCK1	3.87303e-06
ENSSSCG00000031855	3.86947e-06
ENSSSCG00000004970	3.86918e-06
SETD2	3.86847e-06
FNBP1	3.86556e-06
ENSSSCG00000037185	3.86518e-06
ARID1B	3.861e-06
VPS9D1	3.861e-06
LDLRAD4	3.861e-06
ENSSSCG00000028670	3.861e-06
ATL2	3.861e-06
EMG1	3.85715e-06
CBX1	3.85713e-06
ENSSSCG00000031530	3.85547e-06
TMEM87B	3.85389e-06
ACOT7	3.85356e-06
OTUB1	3.85356e-06
HMGXB3	3.85356e-06
PLBD2	3.85356e-06
MRPS18C	3.85356e-06
VPS35L	3.85356e-06
ITSN2	3.85356e-06
SCAMP3	3.85356e-06
DIPK1A	3.85356e-06
GEMIN8	3.85356e-06
ENSSSCG00000031255	3.85356e-06
FMNL3	3.85356e-06
AGK	3.85356e-06
ANLN	3.85356e-06
PIAS1	3.84615e-06
PDE3B	3.84615e-06
DDX39A	3.84615e-06
LNPK	3.84615e-06
ZNF827	3.84615e-06
NDUFA4L2	3.84615e-06
RBMX	3.84171e-06
ENSSSCG00000019768	3.83877e-06
WNT10B	3.83877e-06
SEC23IP	3.83877e-06
PCED1A	3.83877e-06
ENSSSCG00000017906	3.83803e-06
RHOA	3.83497e-06
ENSSSCG00000004446	3.8323e-06
UGCG	3.83142e-06
EXO5	3.83142e-06
GDF15	3.83142e-06
ANKRD61	3.83142e-06
TMEM67	3.83142e-06
ORAI3	3.83142e-06
CDK7	3.83142e-06
ITPA	3.83142e-06
BZW1	3.83027e-06
METAP2	3.82928e-06
ENSSSCG00000015434	3.82755e-06
ENSSSCG00000034697	3.82442e-06
SERTAD3	3.82409e-06
SLC25A40	3.82409e-06
LFNG	3.82409e-06
TNPO2	3.82409e-06
ENSSSCG00000036083	3.82409e-06
MRPL17	3.82409e-06
PQBP1	3.82038e-06
IL7R	3.81679e-06
DCLRE1C	3.81679e-06
THAP1	3.81679e-06
PLCG1	3.81679e-06
RAB28	3.81458e-06
CTDSP1	3.80952e-06
NCF1	3.80952e-06
SERHL2	3.80952e-06
UFM1	3.80952e-06
EZH1	3.80952e-06
POLR2M	3.80952e-06
DPH3	3.80952e-06
ZNF148	3.80952e-06
MTHFSD	3.80952e-06
NIPA2	3.80952e-06
ZNF341	3.80952e-06
CANT1	3.80952e-06
ZC3H15	3.80768e-06
STAT1	3.80588e-06
CDC40	3.80228e-06
GEMIN5	3.80228e-06
LIPH	3.80228e-06
CD80	3.80228e-06
RAD9A	3.80228e-06
NUP54	3.80228e-06
JADE1	3.80228e-06
ENSSSCG00000036247	3.80228e-06
INO80E	3.80228e-06
GPATCH4	3.80228e-06
KYAT3	3.80228e-06
SETD9	3.80228e-06
ENSSSCG00000017446	3.80228e-06
PDK2	3.80228e-06
NELFB	3.80228e-06
TTYH1	3.80217e-06
ENSSSCG00000035544	3.79507e-06
TTF1	3.79507e-06
CCDC51	3.79507e-06
FAM160B2	3.79507e-06
NDUFB8	3.79507e-06
CYP51A1	3.79507e-06
ENSSSCG00000021941	3.79507e-06
FBXO22	3.79507e-06
ENSSSCG00000028531	3.79507e-06
ENSSSCG00000000278	3.79507e-06
SLC38A9	3.79507e-06
SDE2	3.79507e-06
ARFGEF2	3.79507e-06
RUNX3	3.79075e-06
NEDD4L	3.78788e-06
HAO2	3.78788e-06
ALDOC	3.78788e-06
ENSSSCG00000004729	3.78788e-06
EVA1B	3.78788e-06
TMEM126B	3.78788e-06
NEK9	3.78788e-06
GHR	3.78788e-06
ELF1	3.78788e-06
DCAF7	3.78788e-06
TMEM92	3.78788e-06
VRK2	3.78725e-06
NUP210	3.78072e-06
ESRRA	3.78072e-06
NUDT22	3.78072e-06
UEVLD	3.78072e-06
JAK3	3.78072e-06
SPATA24	3.78072e-06
TAF7	3.78072e-06
DIABLO	3.78072e-06
TOP3B	3.78072e-06
MCMBP	3.78072e-06
DNPEP	3.78072e-06
COPA	3.78072e-06
TAF13	3.78072e-06
PMM1	3.78072e-06
HEBP1	3.78072e-06
ATP2B1	3.78072e-06
RAP1GAP2	3.78072e-06
ENSSSCG00000016597	3.78072e-06
PAXX	3.78072e-06
NGLY1	3.77358e-06
TIMM50	3.77358e-06
LPXN	3.77358e-06
MTX3	3.77358e-06
PTPN11	3.77358e-06
CYP4V2	3.77358e-06
PPID	3.77358e-06
SLC39A7	3.77358e-06
MFAP5	3.77358e-06
UBQLN1	3.77358e-06
SGCA	3.77358e-06
DDX17	3.77356e-06
ABHD17A	3.77335e-06
ALDH16A1	3.77156e-06
NPRL2	3.77002e-06
ENSSSCG00000033697	3.76769e-06
SH3GLB1	3.76753e-06
DOCK8	3.76648e-06
VRK3	3.76648e-06
ENSSSCG00000028802	3.76648e-06
TP53I11	3.76648e-06
PRMT3	3.76648e-06
C19orf66	3.76648e-06
ENSSSCG00000029035	3.76648e-06
HARS2	3.76648e-06
AASDHPPT	3.76648e-06
ENSSSCG00000015390	3.76648e-06
ENSSSCG00000008032	3.76648e-06
ZNF318	3.76648e-06
SCAF11	3.76648e-06
UBE2T	3.76648e-06
ALOX15	3.76648e-06
CNOT4	3.76648e-06
FRMD4B	3.76648e-06
NR2C2AP	3.76648e-06
PPIL1	3.76648e-06
SMYD2	3.7657e-06
ENSSSCG00000010056	3.76457e-06
CNOT10	3.75995e-06
CEP78	3.7594e-06
MEPCE	3.7594e-06
BFAR	3.7594e-06
ERMP1	3.7594e-06
ZNF618	3.7594e-06
PAF1	3.7594e-06
ENSSSCG00000033340	3.7594e-06
ENSSSCG00000003984	3.7594e-06
TRMT1L	3.7594e-06
NAGPA	3.7594e-06
ENSSSCG00000039331	3.7594e-06
SPAST	3.7594e-06
SLC5A6	3.7594e-06
ABHD1	3.7594e-06
ENSSSCG00000037971	3.7594e-06
ENSSSCG00000002296	3.7594e-06
C22orf23	3.7594e-06
MTIF3	3.7594e-06
TGIF2.RAB5IF	3.7594e-06
BCAS3	3.7594e-06
GADD45B	3.75851e-06
HP1BP3	3.75815e-06
CLK4	3.75526e-06
CCDC32	3.7539e-06
CCM2	3.75244e-06
ENSSSCG00000032067	3.75235e-06
ENSSSCG00000013584	3.75235e-06
WDR41	3.75235e-06
PLEKHA3	3.75235e-06
CUL3	3.75235e-06
CUL5	3.75235e-06
ZC2HC1A	3.75235e-06
RBBP7	3.75235e-06
KLHL4	3.75235e-06
MORF4L2	3.75235e-06
MTMR1	3.75235e-06
ENSSSCG00000000185	3.75235e-06
SLC6A3	3.75235e-06
HSPH1	3.75235e-06
SLAIN1	3.75235e-06
STK24	3.75235e-06
MAPT	3.75235e-06
ACADVL	3.75235e-06
ENSSSCG00000004666	3.75235e-06
BMF	3.75235e-06
ATP6V0D1	3.75235e-06
EMC1	3.75235e-06
ENSSSCG00000021738	3.75235e-06
CNPPD1	3.75235e-06
CASP6	3.75235e-06
HSD17B10	3.75235e-06
SNX6	3.75235e-06
KHNYN	3.75235e-06
PANK3	3.75235e-06
ENSSSCG00000007454	3.75235e-06
NPEPPS	3.75235e-06
ARHGAP15	3.75232e-06
POU2F2	3.74532e-06
POLR3A	3.74532e-06
CRTC2	3.74532e-06
KNSTRN	3.74532e-06
JAK2	3.74532e-06
ENSSSCG00000023325	3.74532e-06
GNL3	3.74532e-06
GFM1	3.74532e-06
FBXO46	3.74532e-06
LMNB1	3.74532e-06
MSMB	3.74532e-06
ENSSSCG00000015313	3.74532e-06
NCF2	3.74532e-06
HSD17B13	3.74532e-06
MOB1A	3.74532e-06
FANCL	3.74532e-06
CSF1	3.74532e-06
SYN1	3.74532e-06
TBC1D25	3.74532e-06
HUWE1	3.74532e-06
GMPR	3.74532e-06
ENSSSCG00000039980	3.74532e-06
FOS	3.74532e-06
TTLL12	3.74532e-06
WBP4	3.74532e-06
POMK	3.74532e-06
HELZ	3.74532e-06
ENSSSCG00000017766	3.74532e-06
INSIG1	3.74532e-06
RNF166	3.74532e-06
TRAF3	3.74532e-06
FAM3C	3.74501e-06
ENSSSCG00000002036	3.74468e-06
ENSSSCG00000006363	3.74371e-06
GNB2	3.74277e-06
NSUN3	3.73832e-06
LTN1	3.73832e-06
ACP4	3.73832e-06
TPRG1L	3.73832e-06
PRDX5	3.73832e-06
TTC17	3.73832e-06
RAD23A	3.73832e-06
TCF3	3.73832e-06
MLXIP	3.73832e-06
ACADL	3.73832e-06
ING5	3.73832e-06
ENSSSCG00000035894	3.73832e-06
LDOC1	3.73832e-06
STK19	3.73832e-06
RING1	3.73832e-06
NPTN	3.73832e-06
CDK17	3.73832e-06
CARD6	3.73832e-06
GGA3	3.73832e-06
CNTNAP1	3.73832e-06
SEC16A	3.73832e-06
ZNHIT2	3.73832e-06
FEM1C	3.73832e-06
NEIL2	3.73832e-06
CNOT9	3.73832e-06
TMEM165	3.73832e-06
CUX1	3.73832e-06
MEMO1	3.73832e-06
HIST1H2AC	3.73832e-06
MIEN1	3.73741e-06
CD200R1	3.73565e-06
CGAS	3.73534e-06
RAB7A	3.73326e-06
LSM2	3.73222e-06
CNIH1	3.73134e-06
NUDT16	3.73134e-06
PSMD6	3.73134e-06
VPS35	3.73134e-06
CYTH2	3.73134e-06
SLC44A2	3.73134e-06
NPM2	3.73134e-06
TNKS2	3.73134e-06
NIFK	3.73134e-06
EMSY	3.73134e-06
ENSSSCG00000038754	3.73134e-06
PARP2	3.73134e-06
MAP3K8	3.73134e-06
ENSSSCG00000032984	3.73134e-06
TM9SF4	3.73134e-06
NCOA6	3.73134e-06
C17orf80	3.73134e-06
MMD	3.73134e-06
EPHA1	3.73134e-06
ZNRF2	3.73134e-06
ZFAND3	3.73134e-06
UBAP2L	3.73134e-06
RASA3	3.73044e-06
YWHAH	3.7301e-06
CAP1	3.72988e-06
CSNK1G3	3.72756e-06
CPOX	3.72439e-06
ZFP30	3.72439e-06
PIP5K1C	3.72439e-06
REXO2	3.72439e-06
RASAL2	3.72439e-06
FBXL5	3.72439e-06
MED28	3.72439e-06
EXOC6B	3.72439e-06
NSMAF	3.72439e-06
ENSSSCG00000032736	3.72439e-06
BRWD3	3.72439e-06
PACSIN2	3.72439e-06
GTPBP1	3.72439e-06
SLC30A5	3.72439e-06
ENSSSCG00000017038	3.72439e-06
ENSSSCG00000040566	3.72439e-06
ENSSSCG00000037997	3.72439e-06
LBR	3.72439e-06
GPS1	3.72439e-06
MRPL46	3.72439e-06
CEP192	3.72439e-06
HSPA4	3.72439e-06
[truncated: 12,388 more rows]

## Sheet: 21v24_Impurity
Supplementary File 14. Random forest pair-wise analyses of CD2 ɣ𝛿 T-cell cluster. For each model represented below the porcine scRNA-seq cluster IDs compared are shown along with the parameters used and resulting OOB prediction error. Variable importance was assigned by measuring node impurity (Impurity) and using permutations (Permutation). Features that reduced error in predictive accuracy are …
Gene	Impurity
SRGN	16.9214
RHEX	16.6494
ENSSSCG00000032017	16.2485
CD2	11.8284
LCK	11.7548
LGALS1	11.12
S100A11	10.4894
S100A6	9.30519
S100A4	9.11909
PLAC8	7.68949
TRAT1	7.02896
ENSSSCG00000037142	6.72843
CAPG	6.33068
ANXA1	5.50032
B2M	5.2341
ENSSSCG00000014565	5.1392
ENSSSCG00000023584	4.64103
SMC4	4.47824
FCRL6	4.42461
IKZF2	4.35399
NPY	4.12987
ENSSSCG00000013260	4.08013
S100A10	3.73817
LAPTM5	3.64687
PTMA	3.29659
BLK	3.26931
ENSSSCG00000029596	3.26348
SAMSN1	3.17715
CAMK4	3.16857
TSPO	2.85455
ITM2B	2.79696
ENSSSCG00000037885	2.70423
TOX	2.61031
VIM	2.55186
CD52	2.44616
ENSSSCG00000033734	2.42386
ENSSSCG00000003042	2.32731
FCER1A	2.29119
SELL	2.22463
FSCN1	2.10096
UCP2	2.02052
HMGN3	2.0096
EMP3	1.95085
ENSSSCG00000005453	1.84731
ABLIM1	1.82434
ENSSSCG00000017032	1.77321
ENSSSCG00000034914	1.76138
ENSSSCG00000000635	1.74285
PSIP1	1.73461
STMN3	1.70267
EOMES	1.65116
ENSSSCG00000040155	1.64369
ENSSSCG00000039658	1.55682
ENSSSCG00000026217	1.54108
NREP	1.49623
ITGA4	1.48812
ENSSSCG00000004970	1.47807
TAGAP	1.45164
ARHGDIB	1.42935
ENSSSCG00000031088	1.41113
TIMP1	1.40866
RPL10	1.36708
COTL1	1.34731
XCL1	1.34599
SH3BGRL3	1.34542
CALM1	1.31993
PIK3AP1	1.3113
RHOH	1.30381
ENSSSCG00000003930	1.29032
RPL23	1.26083
EVL	1.19889
KIT	1.19781
STK17B	1.15025
TMSB10	1.10049
ENSSSCG00000038507	1.0961
RCAN3	1.06584
UBASH3B	1.05884
ENSSSCG00000005095	1.03792
LTB	1.03376
PPP1CC	1.0334
CD63	1.02887
GATA3	1.00877
ENSSSCG00000003691	0.979022
CD6	0.971352
ENSSSCG00000001229	0.968806
ARF6	0.927852
ENSSSCG00000008032	0.924529
DGKZ	0.919371
BTG1	0.907646
ATP6V1G1	0.900859
PTPRC	0.886605
FAM49B	0.877084
GYPC	0.871208
IL6R	0.851813
RPL39	0.845242
GNA15	0.8434
MATK	0.832602
SGCA	0.823001
ARPC1B	0.81969
PLEKHF2	0.817879
ARHGAP5	0.814569
TCF7	0.814021
PARK7	0.809707
ENSSSCG00000013720	0.805783
RPS11	0.778965
MYL6	0.764902
ENO1	0.761515
ENSSSCG00000034617	0.734564
STMN1	0.734546
CXCR4	0.724724
CD247	0.707939
IL2RB	0.689736
CCR9	0.669033
ITGB1	0.664605
TRDC	0.641643
ADGRG1	0.634736
SAMHD1	0.632955
ENSSSCG00000001341	0.628667
LCP1	0.61265
H3F3A	0.605164
MISP3	0.591231
SLC25A24	0.584483
KRTCAP2	0.56323
HPSE	0.561272
CCR7	0.557269
CGA	0.556853
C15orf48	0.556453
PLVAP	0.555599
HSP90AB1	0.554844
SASH3	0.548522
GSTA4	0.540088
ENSSSCG00000034448	0.533247
MGST1	0.531527
IKZF3	0.528144
MAF	0.512892
HCST	0.512648
GLIPR2	0.505544
UBB	0.50317
PVRIG	0.502623
HMOX2	0.49912
TPM1	0.498901
GSN	0.482957
FADS3	0.474993
ENSSSCG00000037566	0.474445
FUT7	0.472632
BZW1	0.463538
RASGRP1	0.462808
PNISR	0.452448
UBAC2	0.450389
RPL11	0.446776
DCK	0.445994
F2R	0.444021
HES1	0.427005
OTULINL	0.42697
ITM2C	0.426169
ENSSSCG00000003253	0.417481
TST	0.417413
H3F3B	0.417024
STARD4	0.416603
NAPSA	0.416133
VCL	0.414799
ENSSSCG00000033987	0.414273
LAX1	0.412759
ENSSSCG00000027790	0.412661
H2AFV	0.411179
CTSW	0.406876
ENSSSCG00000012119	0.405589
DGKA	0.402812
SOD1	0.3975
CAT	0.393661
FAM171B	0.392682
FAM89A	0.392648
RESF1	0.391581
ENSSSCG00000036296	0.384074
ENSSSCG00000017509	0.383475
KLRK1	0.381053
RPLP2	0.373927
RPS15	0.371494
HBB	0.369159
ENSSSCG00000037595	0.368782
RPS20	0.364568
SLC25A6	0.360872
FES	0.3459
RPL35	0.343177
ENSSSCG00000039544	0.341535
CSTB	0.33963
FYB1	0.338028
ZNF683	0.33678
LNPEP	0.334119
ENSSSCG00000032591	0.333675
CYBRD1	0.331845
CRLF3	0.331581
CST3	0.330169
ENSSSCG00000011234	0.329158
PPP2R5C	0.327739
ENSSSCG00000039581	0.326401
ENSSSCG00000039740	0.324598
ENSSSCG00000008433	0.322059
CIRBP	0.319395
TSC22D3	0.313725
SOX4	0.313343
CCNG2	0.313342
BIRC3	0.312805
ENSSSCG00000014569	0.312464
RPL6	0.312108
RPS14	0.311551
FAM129A	0.307871
JAML	0.306309
ENSSSCG00000012166	0.305502
TMEM173	0.303675
ZAP70	0.30002
ENSSSCG00000006395	0.299908
RACK1	0.299688
RPS21	0.298669
SNTB2	0.297301
PLP2	0.294098
OCIAD1	0.293746
ENSSSCG00000040294	0.293197
MRPS25	0.292653
NDFIP1	0.289743
ANKRD10	0.285922
RPS16	0.284419
MRPL57	0.282729
PTPN18	0.282345
KXD1	0.280821
CBLB	0.280655
PIK3R1	0.280632
PNN	0.278563
ENSSSCG00000033721	0.276825
MNDA	0.275616
YWHAQ	0.273557
DNMT3A	0.273434
ENSSSCG00000009327	0.270877
TNFSF14	0.270548
ANXA5	0.270289
CYTB	0.269003
SUMO2	0.265903
ENSSSCG00000037030	0.265826
PNRC1	0.264314
RGS10	0.26397
PYCARD	0.262163
CLINT1	0.261706
RPS3A	0.261601
ETS1	0.261037
COX1	0.259686
RPS17	0.259676
VAMP8	0.258219
THEMIS	0.257578
NCK1	0.2575
ENSSSCG00000026064	0.256775
DAPL1	0.255699
DUSP1	0.254401
MIF	0.251593
ENSSSCG00000020830	0.25132
ENSSSCG00000026140	0.250896
ATP6	0.250644
ENSSSCG00000000071	0.246392
ENSSSCG00000031773	0.244645
IL18R1	0.244571
PDCD4	0.241279
ENSSSCG00000010203	0.241183
ENSSSCG00000027826	0.240864
PABPN1	0.239392
ENSSSCG00000003520	0.238174
ENSSSCG00000040273	0.238133
JARID2	0.236392
ENSSSCG00000022912	0.23491
CHIC2	0.234403
HSPE1	0.233712
ENSSSCG00000035768	0.232869
RASSF1	0.230928
ENSSSCG00000033019	0.228009
RPS6	0.227854
RPS23	0.224195
ENSSSCG00000013889	0.223278
FLNA	0.223189
YPEL3	0.223151
HSD11B1L	0.221531
ENSSSCG00000013366	0.219197
WAS	0.219054
SNRPN	0.218437
ENSSSCG00000016737	0.218304
ENSSSCG00000036013	0.21795
TFDP2	0.21646
ENSSSCG00000035080	0.216287
COX7C	0.216256
CNP	0.215961
CTSD	0.215625
RPS27	0.213932
ANAPC16	0.21333
PTPRCAP	0.212445
PHACTR2	0.212169
TPM3	0.210475
ITGB2	0.208056
IL21R	0.206154
ENSSSCG00000014855	0.20513
SEC11C	0.2028
ARHGAP9	0.202591
SYTL3	0.202576
LY6D	0.201897
ENSSSCG00000033909	0.201399
PTPN6	0.201081
IFITM3	0.200583
DNAJA1	0.199072
ENSSSCG00000025928	0.198308
ENSSSCG00000039046	0.196878
PSMB8	0.196781
ACTG1	0.196313
SERBP1	0.195587
ENSSSCG00000015710	0.195282
ENSSSCG00000013064	0.195045
EEF1B2	0.194434
ENSSSCG00000006418	0.193427
SNRK	0.192929
RPL9	0.19238
ND5	0.191861
YBX3	0.191719
ND4	0.190514
PDCD1	0.190306
C1orf21	0.189677
NEIL2	0.189219
ENSSSCG00000004145	0.189209
RPSA	0.189182
PPP3CA	0.189071
CGGBP1	0.18852
ENSSSCG00000005481	0.188464
ENSSSCG00000027573	0.18827
ARPC5L	0.188197
PABPC1	0.187979
BZW2	0.187956
ENSSSCG00000017239	0.187935
ARL5A	0.187677
CD3E	0.186973
IL7R	0.186198
ENSSSCG00000008170	0.18611
CCNG1	0.185006
ENSSSCG00000003236	0.184316
ENSSSCG00000014540	0.183769
SMAD2	0.183425
ITGB7	0.183309
ENSSSCG00000030197	0.182989
HSPB1	0.182896
COX4I1	0.182823
RPS26	0.182212
LPAR6	0.181975
RPS10.NUDT3	0.181857
RAC2	0.181566
RPL10A	0.18122
IRF5	0.181083
ENSSSCG00000033697	0.179762
PKIG	0.178727
FLNB	0.177985
ENSSSCG00000029830	0.176983
CD3G	0.176583
PLCL2	0.176442
PTPN22	0.175714
SHISA5	0.173658
H2AFY	0.172242
SPCS3	0.172168
S100A1	0.171403
ITGAM	0.171226
GMPR	0.170836
SAT1	0.16938
HIF1A	0.169373
BIN2	0.167652
RPS9	0.166827
ENSSSCG00000004945	0.166113
COX8A	0.16554
TMEM9	0.165191
PDGFB	0.165053
PTPN1	0.164764
PECAM1	0.164701
LRRC42	0.16428
ENSSSCG00000027491	0.164218
RTRAF	0.163868
RCN2	0.163853
RPL5	0.163658
SSR2	0.163475
RPS5	0.163301
BTF3	0.162774
ENSSSCG00000000576	0.162373
DAZAP2	0.161787
TNRC6B	0.16157
RPS12	0.161336
TRAF3IP3	0.161245
RPS4X	0.16115
ENSSSCG00000037775	0.159505
ENSSSCG00000039460	0.15939
ZNRF1	0.158431
FDFT1	0.158291
RPIA	0.158252
DPP4	0.158096
ENSSSCG00000039706	0.157995
RASGRP2	0.15798
RPLP0	0.157362
RPS18	0.157303
HYPK	0.157169
ENSSSCG00000007355	0.156989
ENSSSCG00000013661	0.156689
TRIM44	0.156627
CCR4	0.156441
SSB	0.156239
TPM4	0.155029
GPR183	0.154613
KLF2	0.154356
RPS13	0.154257
HSPA5	0.154111
IFI6	0.15404
ARPC5	0.153863
STRBP	0.153818
RPL17.C18orf32	0.153149
RAP1B	0.153132
GABARAP	0.15304
TPT1	0.153
ENSSSCG00000035811	0.152373
ENSSSCG00000037364	0.152262
RPL34	0.152253
GMFG	0.151922
ENSSSCG00000037475	0.151595
HSPA8	0.151387
ZNF395	0.150786
VASP	0.150504
RPL22	0.150215
FTL	0.14982
FGR	0.149794
ENSSSCG00000033500	0.149321
CCT2	0.149104
RORA	0.148833
HNRNPH1	0.148762
CCNI	0.148473
FGL2	0.148025
ENSSSCG00000034868	0.148016
CD74	0.147993
GPR18	0.146053
ISG15	0.145732
NOP10	0.145535
SLC11A2	0.145058
HSP90AA1	0.144877
OAZ1	0.144507
RPL37	0.144482
BIN1	0.143571
EIF3H	0.142616
TUBB	0.141765
ENSSSCG00000035507	0.14161
SNAP29	0.141234
TMA7	0.141232
DDAH2	0.141106
YWHAB	0.140417
ENSSSCG00000001063	0.139767
XBP1	0.13927
ENSSSCG00000032003	0.13919
COX2	0.138918
S100A13	0.138682
NDFIP2	0.138643
SUCLG1	0.138261
ND1	0.137814
KDM6B	0.137045
SSR4	0.136751
PFN1	0.136534
HERC5	0.136297
GZMB	0.136219
ENSSSCG00000035869	0.1356
DDX5	0.135411
FLI1	0.134337
TSC22D4	0.133259
GABARAPL2	0.132887
CAMK2N1	0.132569
MRPL40	0.132542
CFL1	0.13246
RFXANK	0.132257
LSP1	0.132233
IRF7	0.132149
TP53I11	0.132044
ENSSSCG00000009303	0.132012
ENSSSCG00000010734	0.131113
EIF4G2	0.130557
ENSA	0.130364
SLC9A3R1	0.129667
ENSSSCG00000006081	0.129024
UPP1	0.12898
ARPC2	0.128757
ENSSSCG00000014075	0.128582
MAP4K4	0.127662
ENSSSCG00000000663	0.127456
IFNAR1	0.127318
2021-09-06	0.126644
FKBP8	0.126209
ENSSSCG00000035224	0.126148
RBM26	0.125918
PSMA4	0.124615
COX6C	0.124519
NDUFB8	0.124341
COX7A2	0.124173
ELK3	0.124096
ENSSSCG00000013992	0.123864
ENSSSCG00000013597	0.123821
NME2	0.123819
ASAP1	0.123768
SRI	0.123458
WFDC2	0.123393
LBR	0.122923
ARPC3	0.122546
S1PR1	0.122477
ENSSSCG00000017213	0.122288
ENSSSCG00000036716	0.122243
ARPC4	0.122239
CAP1	0.121498
MAPKAP1	0.121374
ENSSSCG00000027196	0.120854
THYN1	0.12074
SERPINB1	0.119902
CUTA	0.11969
THOC5	0.119536
POP7	0.118351
GPX4	0.118013
ENSSSCG00000024974	0.117986
ARFGAP3	0.117836
NPM1	0.117742
ENSSSCG00000011272	0.117377
MYO1F	0.117116
NSD3	0.11676
SSR3	0.116726
ENSSSCG00000038825	0.116724
ENSSSCG00000032556	0.11671
GNG2	0.116572
HNRNPDL	0.116469
ATP5F1C	0.116103
ANXA2	0.116013
TNFRSF1A	0.115984
RPL7A	0.11598
ENSSSCG00000014371	0.115659
PARVG	0.115654
NOP53	0.115459
POLR2K	0.115448
COQ8B	0.115137
RPL3	0.114844
RAB4A	0.114159
DDIT4	0.113733
NDUFS5	0.113582
ENSSSCG00000033733	0.113261
ENSSSCG00000028479	0.113204
SMARCE1	0.113099
EIF4A1	0.112906
PRDX2	0.112686
AP2B1	0.112491
ENSSSCG00000012961	0.111922
EEF1AKMT1	0.111679
SRRM2	0.11134
INO80C	0.111236
ENSSSCG00000038711	0.111235
RIN3	0.111007
ENSSSCG00000006919	0.110776
CDC42EP3	0.110601
RUNX3	0.110495
ENSSSCG00000011952	0.109982
ENSSSCG00000009851	0.10966
CDK2AP2	0.109453
ENSSSCG00000000657	0.109328
TRA2B	0.109321
NUCKS1	0.10908
LACTB2	0.10906
ENSSSCG00000036622	0.108831
PKM	0.108602
CD8A	0.107986
ENSSSCG00000025499	0.107358
UQCRC1	0.107055
DBI	0.106705
FKBP11	0.106546
CCNDBP1	0.106516
ENSSSCG00000009239	0.106316
TCF25	0.106298
LIMD2	0.106282
CLDND1	0.106102
ENSSSCG00000006061	0.106033
ENSSSCG00000009772	0.105638
RRP15	0.1056
RNF181	0.105403
ENSSSCG00000008576	0.105298
PRRC2C	0.105001
EIF3I	0.104965
AGFG2	0.104823
RAP1A	0.104692
NDUFA13	0.104689
ISCU	0.104645
ENSSSCG00000030578	0.104141
NTAN1	0.103926
ENSSSCG00000033090	0.103827
AQP3	0.103729
ENSSSCG00000014343	0.103658
SMDT1	0.103597
ENSSSCG00000027348	0.10344
RHOG	0.103321
FBL	0.103271
ID3	0.10321
ENSSSCG00000002550	0.103187
COX6A1	0.103062
ENSSSCG00000004414	0.102905
MGST3	0.102794
ENSSSCG00000034709	0.102712
JAK1	0.102607
ACOT13	0.102526
ENSSSCG00000002004	0.102283
MMADHC	0.102049
CCPG1	0.10202
SPG21	0.101657
ENSSSCG00000035955	0.101581
SPCS1	0.10138
ENSSSCG00000014267	0.10124
CST7	0.100832
ENSSSCG00000004489	0.100677
ENSSSCG00000037081	0.100576
ENSSSCG00000007743	0.100362
ENSSSCG00000001075	0.100361
TMEM9B	0.100357
CORO1A	0.100355
MRPS9	0.100352
ARPP21	0.100094
GBP2	0.0997809
RTF1	0.0993108
HMGA1	0.099049
EIF3K	0.0987852
HNRNPK	0.0987275
ARID4B	0.0986923
HMGB2	0.0985688
IL10RA	0.0984461
TPST2	0.0983974
PSMB10	0.0978598
RPL26	0.0975456
MARCKS	0.0975149
ENHO	0.0973812
SLC25A39	0.0971484
ENSSSCG00000034019	0.0969119
RNF44	0.0968968
SSBP3	0.0967572
ENSSSCG00000002449	0.0965042
PSMB1	0.0964609
RNF19A	0.0962307
TIAM1	0.0959964
ENSSSCG00000001398	0.0957684
HNRNPC	0.095531
ENSSSCG00000002898	0.0954738
AHR	0.0953813
ENSSSCG00000031278	0.0952593
WDR6	0.0952153
ENSSSCG00000004963	0.094787
ENSSSCG00000007188	0.0946758
ZFP36L2	0.0945548
GAPDH	0.0943226
RALGPS2	0.0940447
ERBIN	0.093962
TRAPPC2L	0.0937144
PTBP3	0.0936573
IL4R	0.0932825
ENSSSCG00000001455	0.0932801
TUBA1B	0.0931126
PRDX6	0.0926791
FKBP3	0.092668
C12orf75	0.0925133
PTPN12	0.0925094
SRSF10	0.0924435
CCDC69	0.0923758
PTPN7	0.0920985
ENSSSCG00000028485	0.0919587
UBXN11	0.0917863
ENSSSCG00000003885	0.0916223
GPSM3	0.0916168
COX3	0.091557
SELENOH	0.0912631
TRAPPC5	0.0911248
REX1BD	0.0908838
GPX1	0.0904206
DNAJC5	0.0903657
DBNL	0.0900884
ENSSSCG00000034190	0.0898928
BID	0.0898844
ENSSSCG00000020790	0.0897111
ENSSSCG00000031897	0.0897045
KAT6B	0.089369
CITED2	0.0892205
TLE5	0.0890609
MAX	0.089004
ENSSSCG00000035728	0.0889864
NDUFV2	0.0888745
ECHS1	0.0886951
ARRB2	0.0886026
KLHL15	0.0885897
ENSSSCG00000002505	0.0883447
GLUD1	0.0883123
TMEM107	0.0881282
ST6GALNAC4	0.0880599
ENSSSCG00000000905	0.0880287
ENSSSCG00000035256	0.0879964
COX5B	0.0878906
PDAP1	0.0877092
CASP3	0.087709
NAP1L1	0.0876427
STK26	0.087361
ENSSSCG00000036350	0.0872136
EEF2	0.0870841
ENSSSCG00000037602	0.0870698
ENSSSCG00000003903	0.08704
URM1	0.0869546
KRAS	0.086872
AGK	0.0868286
IAH1	0.0868041
ENSSSCG00000009625	0.0867706
ENSSSCG00000000405	0.0866927
NDUFB4	0.0866821
SERPINF1	0.0866106
H2AFZ	0.0864943
EIF2S2	0.0863759
ENSSSCG00000000500	0.0862791
EEF1D	0.086102
ARL6IP5	0.0860628
ME2	0.0860403
FLT3LG	0.0860223
ENSSSCG00000012916	0.0859033
ERH	0.0858883
CHCHD7	0.0858606
EMB	0.0857438
RANBP1	0.0857292
REV1	0.0856749
EPHB6	0.0855088
ENSSSCG00000033653	0.0854591
PRPF4B	0.0853364
ENSSSCG00000031912	0.0853095
VCP	0.0852728
TIA1	0.0852081
ZRANB2	0.0851791
TUT4	0.0851664
SCARB2	0.085142
ENSSSCG00000012403	0.0849447
RASA3	0.0849226
SRP14	0.0848243
TMEM123	0.0845773
C12orf45	0.0845522
AKT2	0.0844205
PDIA3	0.084369
NDUFA6	0.0843334
ACOX1	0.0841358
AIMP1	0.0840738
TGIF1	0.0840361
KDM5B	0.0839338
SNRNP200	0.0838829
EIF3E	0.083869
LGALS3BP	0.0838071
SUCLG2	0.0837265
RFC2	0.0835882
DYRK2	0.0835662
SPTBN1	0.0835217
G3BP1	0.0834566
WASF2	0.0834396
ENSSSCG00000004446	0.083432
SF3B2	0.0833324
ND2	0.0832843
SON	0.0832359
ACP5	0.0830646
TMBIM6	0.083022
FCGRT	0.0829584
COX6A2	0.082939
SUMO1	0.0829305
ENSSSCG00000024973	0.0828578
CCDC82	0.0828386
HVCN1	0.0827249
STRADB	0.0826492
ATP6V0B	0.0826298
RPL7	0.0825354
ENSSSCG00000001097	0.0824438
CYP51A1	0.082383
ARHGAP15	0.082327
DDX17	0.0823218
ENSSSCG00000030295	0.0822951
ENSSSCG00000008898	0.0822871
SDE2	0.082195
ENSSSCG00000023331	0.0821795
SDF2	0.0821395
PSMD2	0.0818536
TERF2IP	0.0818276
ATP5ME	0.0814531
UQCRQ	0.0814335
GSE1	0.0813697
ENSSSCG00000036988	0.0813578
SRSF2	0.0810612
NFKBIA	0.0810074
DCXR	0.0809697
ADH5	0.0809001
ENSSSCG00000040118	0.0808723
EMD	0.0807089
TWF2	0.0806399
ENSSSCG00000024263	0.0805592
ACTR2	0.0805321
SUPT4H1	0.0805008
SRSF5	0.0804038
SMPD2	0.0803662
EPSTI1	0.0802771
SDHB	0.0802418
DCTN5	0.0801588
YWHAZ	0.0799182
ENSSSCG00000003914	0.0798546
PSMB4	0.0798409
ATP5F1E	0.0797642
CAMTA2	0.0796996
WBP1L	0.0796779
ENSSSCG00000034314	0.0796088
HCLS1	0.079512
SYNGR2	0.0794758
KLHDC3	0.0794602
ENSSSCG00000024776	0.0792865
PAIP2	0.0791445
RHEB	0.0790239
TMEM71	0.0790076
NCL	0.0788956
RNASEH2C	0.0788734
ENSSSCG00000001407	0.0787878
ENSSSCG00000016096	0.0787658
ATF4	0.0784992
KHDRBS1	0.0784
ENSSSCG00000013721	0.078278
MRPS23	0.0782725
UBXN1	0.0781648
PRELID1	0.0781466
TCF3	0.0781447
CSNK1A1	0.0780261
TRPV5	0.0779069
RALY	0.0777769
SEC61B	0.0777502
REL	0.0776711
GCHFR	0.0775353
MAP3K1	0.0772924
CCT4	0.0772312
CSRP1	0.0772311
TP53INP1	0.0769613
PRKCB	0.0767423
CLTA	0.0767172
RCC2	0.0767048
MYO1G	0.076702
EMC6	0.0766487
TMED10	0.0765356
SNX6	0.0765283
MAP1LC3B	0.076462
PSMD1	0.0763968
ENSSSCG00000012178	0.0763474
PXK	0.076309
ENSSSCG00000014013	0.0762659
ENSSSCG00000031730	0.0762637
ENSSSCG00000007609	0.0762551
RPL36AL	0.076208
DUSP2	0.0759061
ENSSSCG00000007978	0.0758681
NEDD8	0.0758189
TGIF2.RAB5IF	0.0757971
RAB10	0.0757532
NDUFC1	0.0757427
ENSSSCG00000013436	0.0757405
HP1BP3	0.0757375
DHX9	0.0756405
ENSSSCG00000015337	0.0755684
ELF1	0.075294
NANS	0.0751626
SELENOF	0.0749961
ELMO1	0.0748022
DAD1	0.0748017
EIF1	0.0745102
ENSSSCG00000013874	0.0741193
HIST1H1E	0.0740884
MBNL1	0.0740268
STAT1	0.0739101
ENSSSCG00000027907	0.0738576
ENSSSCG00000004583	0.0737574
ENSSSCG00000017626	0.0737437
UBXN4	0.0736268
LAMTOR4	0.0734581
RAB7A	0.0733567
WDR48	0.0732173
CHD3	0.0732112
MRPS36	0.0731665
ENSSSCG00000036491	0.0731447
RRAGC	0.0731141
RHOQ	0.0730059
CD37	0.0729412
ENSSSCG00000006376	0.0727862
ENSSSCG00000007435	0.0727467
GADD45A	0.0727401
OGA	0.0725414
SLC25A36	0.0725393
HSPD1	0.0724744
RAB8B	0.0723513
ENSSSCG00000039407	0.0723492
METTL27	0.0723436
BRD4	0.0723124
PUF60	0.0722054
UBE2D3	0.0720861
COX5A	0.072077
GTF2I	0.0719573
COX7A2L	0.0719052
RBM39	0.0718033
SEC61G	0.0717586
TMEM59	0.0715484
MCL1	0.0715156
EIF4H	0.0715155
RAB1B	0.0714598
CCT5	0.0714569
ANKRD12	0.071384
NBN	0.0713716
FAM32A	0.0713303
IL9R	0.0712815
ZNHIT1	0.0712543
TIMM10	0.0712096
BCAP31	0.0711998
BCLAF1	0.0710877
NAXE	0.0710809
ENSSSCG00000029066	0.0710143
OTULIN	0.0709917
RORC	0.0709272
TAX1BP1	0.0708661
C19orf53	0.0708534
CCL5	0.0707927
ZNF207	0.0707576
CHRAC1	0.0706497
ATP5MC2	0.0706386
PTPN11	0.0706179
ENSSSCG00000018063	0.070487
SEC62	0.0704794
LAT	0.0701247
SIVA1	0.0701029
RGS19	0.0700461
SFT2D1	0.0700236
EMILIN2	0.0699715
ENSSSCG00000017555	0.06993
TRAM1	0.0698113
POLR2E	0.0698062
TALDO1	0.0698037
OTUB1	0.0697646
ND4L	0.0697197
RAN	0.0697196
PPP1CA	0.0696214
ENSSSCG00000027840	0.0696051
RABAC1	0.0695881
ENSSSCG00000008061	0.0694605
PRDX4	0.0693999
ARL6IP6	0.0693216
ABI1	0.0693065
BAZ1B	0.0692522
DDX39B	0.0692219
SELENOS	0.0691391
CD48	0.0688412
ATF7IP	0.0687836
GUK1	0.0687564
SRRM1	0.0687523
RGCC	0.0686869
RASSF2	0.0686365
LAT2	0.0684616
TAF1D	0.0682571
ND3	0.0682084
RBX1	0.0681335
TUT7	0.0680682
RALB	0.0680674
ZNF292	0.0680338
ATP5PF	0.0680245
PPIB	0.0680242
ENSSSCG00000025525	0.0679934
BRWD1	0.0679202
KMT2E	0.0677832
TRAF5	0.0677475
YIPF4	0.0676575
ZNF354C	0.0676516
CASS4	0.0676188
UFM1	0.067532
CYFIP2	0.06744
ENSSSCG00000033068	0.0673886
ENSSSCG00000010320	0.0673651
ACTB	0.0672717
NCKAP1L	0.0671752
IDH2	0.0671332
ERAP2	0.0671321
TNFAIP8	0.0670679
PCNA	0.0670623
EZR	0.0669931
ENSSSCG00000027565	0.0669407
GALNT1	0.0668797
ENSSSCG00000038900	0.0668477
ENSSSCG00000013568	0.0668
NAA20	0.0667192
TOM1	0.0665737
SMIM7	0.0665715
TUBB2B	0.0665477
ATP5PO	0.0664718
POLR1D	0.0663385
ENSSSCG00000013878	0.0662573
YTHDF2	0.0661815
TMBIM1	0.0660867
STK38	0.0660757
ENSSSCG00000015664	0.0658415
PSMA7	0.065817
ILK	0.0658138
ENSSSCG00000016758	0.0657971
EIF3L	0.0657699
TBC1D10C	0.065719
MRPL20	0.0656915
CTSB	0.0656586
NONO	0.0656354
NAPRT	0.0656277
COMMD3	0.0655694
CRADD	0.0655118
ENSSSCG00000003348	0.0654765
PSMC5	0.0654673
DHX15	0.0654109
ARGLU1	0.0654086
DYNLRB1	0.0653314
CD44	0.0653032
ENSSSCG00000038989	0.0653027
PBRM1	0.0651389
RAB1A	0.0651125
CASP7	0.0650922
OXLD1	0.0650681
COX7B	0.0649868
BCCIP	0.0649402
TXNDC17	0.0649204
CDC14A	0.0649172
MYO5A	0.06487
GLRX3	0.0648509
ENSSSCG00000016711	0.0648403
SCAND1	0.0647318
TYMS	0.0646715
COPS2	0.0645004
B3GNT2	0.064471
FAM192A	0.0644681
GTF2H5	0.0644491
SMARCA5	0.0644473
BCAP29	0.0643729
LRCH4	0.0643716
RAB24	0.0643481
RBBP4	0.0642855
CFLAR	0.0642283
ID2	0.064205
LMO4	0.0641973
ACSS3	0.0641583
CCSER2	0.0641424
ENSSSCG00000014850	0.0641074
CCNL1	0.0640239
ITGA5	0.0640033
PAFAH1B1	0.0639614
CTSC	0.0638064
PPP2R2A	0.063705
EIF1B	0.0636737
BATF	0.0636258
CCDC28A	0.0635508
UQCR10	0.0634306
DMAC2	0.0633501
ENSSSCG00000023792	0.0631743
UBE2B	0.063171
2021-09-01	0.0629672
ENSSSCG00000011237	0.0628979
ACO2	0.0628855
TTYH3	0.0628777
LASP1	0.0628728
NAT9	0.0628276
TAB2	0.0627873
TMCO1	0.0626933
SMARCA4	0.0626832
DHX29	0.0626222
2021-09-09	0.0626058
CD69	0.0625047
CAPZB	0.0624414
MFAP1	0.062423
MICOS10	0.0624136
SF3B1	0.0623174
DPM2	0.0622956
GLS	0.0622367
CD53	0.0622284
C12orf10	0.062222
MTA2	0.0622205
ENSSSCG00000011764	0.0619885
CTNNB1	0.0619812
PSMA6	0.0619708
IFI30	0.0619528
AHSA1	0.0618556
XPA	0.0618111
FH	0.0618099
NDUFS4	0.0617362
ZNF277	0.0617228
CUL3	0.0616993
RCSD1	0.0616619
PRKACB	0.0616552
SF3B6	0.0615412
NDUFA9	0.0615036
SF3B5	0.0613895
FAXDC2	0.0613644
PLEKHA1	0.0613321
ATP5IF1	0.0613196
NARS	0.0612335
SFPQ	0.0611348
LENG8	0.0611326
CASP6	0.0611011
FERMT3	0.0609507
DPPA5	0.0609104
ENSSSCG00000035538	0.0608872
ENSSSCG00000001456	0.0607245
FAM49A	0.0606625
ENSSSCG00000035162	0.060651
CISH	0.0606498
SQLE	0.0606014
NAA10	0.0604531
PDHB	0.0604379
H6PD	0.0603564
ENSSSCG00000037071	0.0603012
DYNLT3	0.0602003
REEP5	0.0601801
ITPRID2	0.0601658
ATP5MD	0.0601618
ENSSSCG00000013315	0.0601617
UCHL5	0.060153
ASPSCR1	0.0601077
PRKCSH	0.0600999
CASTOR1	0.0600127
PFDN2	0.0599975
FAM78A	0.0599702
TPR	0.0599504
IFI35	0.059937
WDR1	0.059886
PIP4K2A	0.0598705
MAP2K3	0.0598427
IRF1	0.0597151
ELP5	0.0596556
CSDE1	0.0595399
THRAP3	0.05952
ATP6V0C	0.0594958
ACRBP	0.0594911
ENSSSCG00000021591	0.0594662
HNRNPM	0.0593249
PSME1	0.0593192
SNRPD1	0.0592546
UBXN6	0.0590629
GTF2F2	0.0589618
NDUFA10	0.0589183
POLR2I	0.0589097
THOC2	0.0589057
ENSSSCG00000007253	0.058895
PDGFA	0.058789
STK4	0.0587667
SPOP	0.0586872
ATP5PB	0.0586608
TES	0.0586054
RHOA	0.0585806
ENSSSCG00000000611	0.0584905
C6orf62	0.0584675
NIPBL	0.058459
ENSSSCG00000018061	0.0584132
2021-09-07	0.0583999
ZFAND2B	0.0583342
ENSSSCG00000012397	0.058127
ENSSSCG00000035738	0.0581268
PRMT1	0.0580288
DNAJC9	0.0580033
RAB11B	0.0579925
CAPNS1	0.0579235
CSNK1D	0.0579193
HSPA4	0.0578245
GPD1	0.0578173
MIEN1	0.0578157
GRAP	0.0578028
MAP2K2	0.0577971
SH3GLB1	0.0577686
ZNF609	0.0577297
CCNB1IP1	0.0575919
STOML2	0.0575633
ENSSSCG00000009788	0.0575381
ENSSSCG00000024313	0.0574211
ROCK1	0.0573784
RAB2A	0.0573578
CNOT6L	0.0573513
ENSSSCG00000000097	0.0573469
ENSSSCG00000016263	0.0573304
SRSF11	0.0572195
TRAPPC3	0.0572168
TPM2	0.0571783
ALOX5AP	0.057171
ENSSSCG00000040529	0.0571655
PPP2R3C	0.0571611
TNFSF10	0.0571575
ENSSSCG00000033212	0.0571541
RBM8A	0.0571506
DNAJC8	0.0571463
ENSSSCG00000016990	0.0571117
RNASEH2B	0.0570266
SAP18	0.0570134
EIF3D	0.0569685
INSIG1	0.0569658
STARD3NL	0.05684
ARHGAP4	0.0568305
ACTN4	0.0568257
DDX18	0.0567805
CD226	0.0567736
NCOA7	0.056731
ARL6IP1	0.056724
ENSSSCG00000002996	0.0566961
CEP170	0.0566718
DDT	0.0566198
IFI44L	0.0565772
YTHDC1	0.0565373
AUP1	0.0565096
PLAAT3	0.0563752
GNAI2	0.0563684
CD81	0.0563669
ACAT1	0.056338
HSBP1	0.0562118
TWISTNB	0.0561623
LBH	0.0561182
CSK	0.0561026
CENPH	0.0560887
STX10	0.0560777
APOBEC3B	0.0560707
ARL2BP	0.0560568
TXNL4A	0.0560237
TLE4	0.0559865
PPP2R1A	0.0559611
MAN1C1	0.0559191
NOP58	0.0558478
MTF2	0.055839
TBX21	0.0558301
ENSSSCG00000011917	0.0557021
ENSSSCG00000015040	0.0556677
PGM1	0.0556627
IFT80	0.0556588
PRPF8	0.0556134
NKG7	0.0556056
EIF4A2	0.0556045
ENSSSCG00000023126	0.0555828
EML4	0.0554547
DDRGK1	0.0554159
TPI1	0.0553996
UXT	0.0553873
DPM1	0.0553437
PSMB6	0.0552482
TM6SF1	0.0551895
CRIPT	0.0551094
ZC3H14	0.0550905
LEF1	0.0550281
MRPS26	0.0549119
PSMD13	0.054883
SUPT16H	0.0548763
GMPS	0.0548644
PTBP1	0.0548432
ARHGDIA	0.0548379
ENSSSCG00000031855	0.0548064
ENSSSCG00000036593	0.0547434
AHI1	0.0546776
FUNDC1	0.0546497
ADNP	0.0546485
ENSSSCG00000021560	0.0546418
PHYH	0.0546049
GCNT4	0.054562
ETS2	0.0545331
ENSSSCG00000010795	0.0544141
ZC3H13	0.0543336
SMNDC1	0.0543293
DHX58	0.0542608
SIGIRR	0.0542473
PTP4A2	0.0542277
TIMM13	0.0542066
POLR2F	0.054129
AKR1A1	0.0541206
PTGES3	0.0540858
ENSSSCG00000029857	0.0540725
RAB18	0.0540682
PRDX5	0.0540519
B4GALT1	0.0540384
SSBP4	0.054032
HM13	0.0540072
UBE2H	0.0539443
NUBP2	0.053892
ACSS1	0.0538588
BPTF	0.0538532
RNPS1	0.0538393
SGTA	0.0538326
TCEA2	0.0538234
TESC	0.0537622
SEC11A	0.0537204
CWC15	0.0537077
CAPN1	0.0536923
ENSSSCG00000001414	0.0536597
UNC13D	0.0536061
ANGEL2	0.0536006
NCALD	0.053582
SUPT3H	0.0535754
RSAD2	0.0535741
FBXL5	0.0535281
DHRS11	0.0535252
SNX2	0.0534584
VPS28	0.0534028
PHF5A	0.053388
KHSRP	0.0533817
NECAP2	0.0533538
RASL10B	0.0533056
PRKD3	0.053294
SVIL	0.0532804
RPL27	0.0532745
SLC35C2	0.0532455
ENSSSCG00000013176	0.0532239
CYCS	0.0531951
BRK1	0.0531793
HNRNPD	0.0530747
ENSSSCG00000034072	0.0530738
OSTF1	0.0530572
MAP4K2	0.0530313
PEF1	0.0530281
ENSSSCG00000010104	0.053003
TAF7	0.0529625
SKP1	0.0529351
SNF8	0.0528657
SAMM50	0.0528583
ENSSSCG00000040857	0.0527729
ANKRD13A	0.0525926
ATP6V1F	0.0525844
TMOD3	0.0525751
COMMD1	0.0525614
ENSSSCG00000003849	0.0525477
GPR174	0.0525232
CD99	0.0524968
ENSSSCG00000037299	0.0524945
GPR171	0.052378
PRPS1	0.0523651
NDUFAF3	0.0523107
ENSSSCG00000021427	0.052276
STIP1	0.0521689
CCT3	0.0521674
NCOA3	0.0520593
NOL7	0.0519692
TRMT112	0.0519594
CD5	0.0518223
MRPL39	0.0517671
ENSSSCG00000012459	0.0517642
SH2D1A	0.0517629
TOX4	0.0517534
ENSSSCG00000027689	0.0517332
LAMTOR5	0.0516913
ENSSSCG00000025565	0.0516767
ATP5F1A	0.0516669
PSMD14	0.0516598
DDX46	0.0515839
DTX3	0.0515499
ENSSSCG00000033918	0.0515245
ENSSSCG00000013596	0.0514826
ACBD6	0.0514661
PPP2R5E	0.0514531
POLR2G	0.0514426
ENSSSCG00000003211	0.051315
FAM177A1	0.0512999
PTP4A1	0.0512776
ENSSSCG00000033272	0.051262
ANGPTL1	0.0512402
ESD	0.0512305
RBL2	0.0511317
FOS	0.0511277
ADCY7	0.0510676
PLEKHB2	0.0510212
ADD3	0.0510199
MINDY2	0.0509798
FOXK1	0.0508756
SAFB2	0.0508721
DDX27	0.0508636
SMARCA2	0.0508565
PIK3IP1	0.050845
ATRX	0.0507449
GHITM	0.050714
SIPA1	0.050696
COPB1	0.0506755
GDI1	0.0506308
ENSSSCG00000022246	0.0505084
ENSSSCG00000027905	0.0504523
ORC3	0.0504314
HNRNPR	0.0503931
ENSSSCG00000028663	0.050384
DARS	0.0503492
SPTAN1	0.0503143
ENSSSCG00000030478	0.0503085
RAB5A	0.0502689
HDGF	0.0502291
AGTRAP	0.0502164
TOMM7	0.0501982
ZFP36L1	0.0501912
TMEM11	0.0501482
ENSSSCG00000016323	0.0501383
2021-03-07	0.0501296
ITPR2	0.0501272
TMEM189	0.0501229
STRAP	0.050097
ENSSSCG00000007944	0.0500874
ENSSSCG00000012517	0.0499761
ACSF2	0.049902
ENSSSCG00000016400	0.0498833
CHCHD10	0.0497121
RECQL	0.049643
RPN2	0.0496428
LRRC8A	0.0495493
MICU1	0.0495373
AFTPH	0.0495221
NDUFA1	0.049494
ENSSSCG00000005656	0.0494802
GPR155	0.0494649
YWHAH	0.0494391
ETFB	0.0494383
DHRS3	0.0494257
KDSR	0.0494075
POLR2C	0.0493372
PAIP1	0.0493207
RAC1	0.049248
TMEM30A	0.0492274
ANXA11	0.0491437
EIF3A	0.0490417
RER1	0.0490182
RPUSD1	0.0489683
THOC1	0.0489537
UBE2V1	0.0489433
SNX18	0.0488967
FNBP1	0.0488598
TXNIP	0.0488527
PDCD5	0.0487427
MORF4L1	0.0486777
VPS36	0.0486765
DCTN6	0.0486741
ZC3H12D	0.0486595
SKAP1	0.0486454
CTBP1	0.0485072
MACO1	0.048478
POMP	0.0484169
HMGN2	0.0484136
ERO1A	0.0483174
TMEM50B	0.0483075
TMEM258	0.0482877
UBC	0.0482491
ENSSSCG00000039071	0.0482385
LXN	0.0482061
ATP2A3	0.0480897
AMZ2	0.0480825
ELAVL1	0.0480779
NIPSNAP3B	0.0480567
SAR1A	0.0480071
CYLD	0.0479892
BAZ1A	0.0479632
MRPL22	0.0479587
P2RY10	0.0479528
HMGN4	0.0479239
RASSF3	0.0478888
ENSSSCG00000011077	0.047851
ENSSSCG00000036096	0.0478337
PSMC6	0.0477459
UROS	0.0477055
CAST	0.0476438
TSR3	0.047636
KATNA1	0.0475839
ENSSSCG00000022176	0.0475187
COMTD1	0.0475178
GNB2	0.0474686
YIPF5	0.0474607
GSTO1	0.0474384
ENSSSCG00000005480	0.047416
ENSSSCG00000016100	0.0473833
SF3A3	0.047352
SNRPD3	0.0472315
ENSSSCG00000004253	0.0471809
NUDT21	0.0470929
ENSSSCG00000028035	0.0470881
YPEL5	0.0470761
LY96	0.0470571
TAF13	0.0470233
RIT1	0.046995
VMP1	0.0469776
ENSSSCG00000002907	0.0469158
PIP4P1	0.0468682
TVP23C	0.0468412
UPF3B	0.0468329
POGLUT1	0.0468276
POLD3	0.0468243
LSM3	0.046768
ENSSSCG00000006665	0.0467465
SH3KBP1	0.0467197
SLC25A3	0.0466882
CYBC1	0.046607
MAP1S	0.0465366
ENSSSCG00000038359	0.0464974
DDX47	0.0464556
PIK3C2B	0.046448
ENSSSCG00000034527	0.0464479
NXT1	0.0464392
AICDA	0.0464348
SLAIN1	0.0464325
SELENOT	0.0464243
ELK4	0.0464041
CHTOP	0.0463811
CENPC	0.0463358
B3GNT3	0.0462917
PSMB7	0.0462888
JADE1	0.046282
U2SURP	0.0462768
SDHAF2	0.0462404
FIP1L1	0.0462003
ENSSSCG00000032942	0.0461779
CDC37	0.0461579
RSF1	0.0460882
GZMM	0.0460882
ENSSSCG00000031169	0.0460772
SH2D3C	0.0460357
FAM210A	0.046029
ROMO1	0.0459436
ANXA7	0.0458719
ENSSSCG00000031580	0.045843
NSRP1	0.0458289
ENSSSCG00000006830	0.0457713
EXOSC8	0.0457707
MDM4	0.0457501
TIMM50	0.0457372
THY1	0.0456208
ENSSSCG00000021663	0.0456101
ENSSSCG00000003261	0.0455974
SDHD	0.0455216
CD47	0.0454854
PCM1	0.0454741
CAPZA1	0.0454731
STK25	0.0454325
TXNL1	0.0454302
MRPS11	0.0454291
FBXW7	0.0454279
ENSSSCG00000036603	0.0453789
ENSSSCG00000016044	0.0453554
ZNF644	0.0452987
NFE2L2	0.0452364
TMEM50A	0.0452224
NPC2	0.0452194
RAB11A	0.045193
MIB2	0.0451793
SLC25A5	0.0451533
PSMB3	0.0451486
LPAR3	0.045142
CEP192	0.0450716
MYCBP2	0.0450662
NFATC2	0.0450575
C20orf27	0.0450439
ATP5MC3	0.0449778
DTYMK	0.0449589
SNRPE	0.0449424
ETF1	0.0449397
ENSSSCG00000011117	0.0449123
DAP3	0.0448885
CSNK1G3	0.0448616
ENSSSCG00000016970	0.0448542
NOTCH2	0.0448319
NSFL1C	0.0448081
DONSON	0.0447783
PDCD10	0.0447696
RBM12	0.0447588
PPP1R18	0.0447552
ZNF428	0.0446862
PKN1	0.0446808
ABR	0.0446314
PHKG2	0.0446115
ENSSSCG00000036114	0.0446097
PRR7	0.0445534
PPIF	0.0445477
TMEM160	0.0444633
ENSSSCG00000011290	0.0444564
SLCO3A1	0.0444439
DLG1	0.0444167
HDAC1	0.0444065
ENSSSCG00000035048	0.0443929
DENND2D	0.044342
ACTR6	0.0443341
BABAM2	0.0442374
ASB9	0.044227
STAT4	0.0442103
NDUFV3	0.0442088
CHORDC1	0.0441816
NSMCE4A	0.0441687
EIF4B	0.044077
PIP5K1C	0.0440509
SAR1B	0.0440445
C6orf203	0.044007
SH3BGRL	0.0439793
DAXX	0.0439431
CAPZA2	0.0439424
ENSSSCG00000039217	0.0439409
ACTR1A	0.043934
ARMC10	0.0438719
IMP4	0.0438635
FIBP	0.0438623
C21orf91	0.0438547
HNRNPU	0.0438542
ZCCHC9	0.0438504
ENSSSCG00000001779	0.0438413
ARL4C	0.043823
TRIM38	0.0438109
FOXO3	0.043799
TUFM	0.0437704
RAB27A	0.0437422
ENSSSCG00000023643	0.0437224
GP9	0.0436902
TUBA4A	0.0436783
GABARAPL1	0.0436456
CD200	0.0435925
CAPRIN1	0.0435837
TM2D1	0.0435584
TRUB2	0.0435563
TIPRL	0.0435246
PSMA3	0.0435076
CCDC9	0.0434949
ENSSSCG00000017146	0.043455
IVNS1ABP	0.0434511
CD38	0.043421
NUB1	0.0433874
NUP50	0.043387
DENND1C	0.0433776
KPNB1	0.0433489
CORO1C	0.0433395
CMAS	0.0433141
RSRP1	0.043267
RTF2	0.0432427
MED4	0.0432398
MDH1	0.0432096
NEIL1	0.0432029
STAR	0.0431822
DYNLL1	0.0431635
ENSSSCG00000007203	0.0431633
DLD	0.0431607
NDUFC2	0.0431384
HNRNPH3	0.0431099
TMCO3	0.0430835
SYF2	0.0430523
UBL4A	0.0430092
CCDC115	0.0430063
FNBP4	0.0429892
ENSSSCG00000027085	0.042982
ZNF358	0.042982
ENSSSCG00000025060	0.0429117
ZBTB38	0.0429089
ENSSSCG00000039635	0.0428539
ENSSSCG00000036483	0.0428316
BAZ2B	0.0427258
TMED4	0.0427102
VPS11	0.0426934
PSMB2	0.0426767
ZC3H7A	0.0426703
ENSSSCG00000022906	0.0426548
RNMT	0.0426153
CHMP5	0.0426092
EFTUD2	0.0425852
DYRK1A	0.0425708
PRPF40A	0.0425585
PATL1	0.0425187
PDK1	0.0425105
ENSSSCG00000009926	0.0424173
ENSSSCG00000039249	0.0424164
ENSSSCG00000007749	0.0423633
TGFBR2	0.0423531
SLA.DQB1	0.0423243
TNNI2	0.0423037
FBXO7	0.0422869
EIF2B2	0.0422782
OXA1L	0.0422512
SYT8	0.0422364
TAPBP	0.0422125
PDZD11	0.0421687
IMMT	0.0421663
ZFP36	0.0421263
ENSSSCG00000000365	0.0420295
FUS	0.0420009
NDUFAF2	0.0419959
CANX	0.041987
SRSF6	0.0419639
SMC3	0.0419617
DUSP11	0.0419229
PSMB9	0.0419167
RHOF	0.0418976
POFUT2	0.0418972
C12orf73	0.0418592
GPS1	0.0418315
FMNL1	0.0418292
NFRKB	0.0417796
EIF4A3	0.0417065
PPP4R3B	0.0416789
ENSSSCG00000032166	0.0416423
ENSSSCG00000037597	0.0416416
ENSSSCG00000016451	0.041635
DDX3X	0.0416271
SLU7	0.0416119
EDEM1	0.0416044
ELOC	0.0415628
SMIM19	0.0415495
GEMIN7	0.04153
PIAS1	0.0415122
CYP4V2	0.0414992
PTDSS1	0.0414568
ENSSSCG00000013052	0.0414567
RAB28	0.0414495
TDP2	0.0414396
BCL10	0.0414317
SSRP1	0.0414151
SAMD9	0.041408
CD96	0.0414036
MAPK1IP1L	0.0413802
FAM104A	0.0413532
RBPMS	0.0413077
LAMP2	0.0412908
ENSSSCG00000017038	0.041273
APBB1IP	0.0412711
ENSSSCG00000006363	0.0412636
KAT8	0.0412293
TMEM126A	0.0412271
KLF13	0.041219
FGD3	0.041163
COPS6	0.0411461
ENSSSCG00000013232	0.0411271
ENSSSCG00000004349	0.041038
CNN2	0.0409398
PCBP2	0.0409396
DDX41	0.0408908
NRBP1	0.0408665
THOC6	0.0408393
CETN3	0.0408352
SNX3	0.0408268
USP48	0.0408184
ENSSSCG00000015390	0.0407894
SLC7A6	0.0407808
PQBP1	0.0407799
MRPL37	0.0407484
IMMP1L	0.0407335
PIGY	0.0407333
SNAPIN	0.0407329
ENSSSCG00000037399	0.0406856
CASC3	0.040661
BTF3L4	0.0406376
MAEA	0.0406281
ENSSSCG00000006996	0.0406268
MLLT3	0.0406238
SETX	0.0405901
NCOA4	0.0405899
SNRNP40	0.0405276
PPP4R3A	0.0405217
RAB19	0.0404957
TMEM165	0.0404875
ATP6V1E1	0.0404778
DDX6	0.0404628
SNRPC	0.0404543
CDC16	0.0404456
ALG13	0.0404311
UBE3A	0.0404225
SUSD3	0.0403782
CCDC18	0.0403477
ENSSSCG00000022058	0.0403457
GARS	0.0403343
ZNF300	0.040323
HLA.DRA	0.0403203
MRPL38	0.040302
MSL1	0.0402922
BRD9	0.0402407
VPS16	0.0402251
PRPF19	0.040221
GTF2F1	0.040218
ENSSSCG00000040248	0.0401615
CTSA	0.0401495
IKBKE	0.0401119
ATG5	0.0400788
MED21	0.0400756
TBCA	0.0400528
CHSY1	0.0400377
VPS13C	0.040018
DHX36	0.0400005
RBM41	0.039953
MTDH	0.0399355
RIOX1	0.039925
RAB35	0.0399156
ARID4A	0.0398727
GDI2	0.0397577
DDX42	0.0397417
CHMP6	0.039725
TRIM24	0.0397155
YKT6	0.0397128
ORAI3	0.039708
UBE2L6	0.0396772
TMEM109	0.0396638
RASAL3	0.0396511
USO1	0.0396267
LMAN2	0.0396179
MLX	0.0395961
PAK2	0.0395932
RUNX1	0.0395751
TASOR	0.0395747
NDUFB10	0.0395407
CBFB	0.0395169
ATP5F1D	0.0395086
CRKL	0.0394895
MYB	0.0394505
DNAJB1	0.0394414
RSRC2	0.0394253
EPS15	0.0393947
LSM7	0.0393877
IFIT1	0.0393404
CNBP	0.0393285
TMEM69	0.0392831
ENSSSCG00000023323	0.0392377
GNPDA2	0.0392323
RIOK3	0.0391959
GYS1	0.0391681
GLIPR1	0.0391644
NDUFS8	0.039056
CARF	0.0390225
ENSSSCG00000011329	0.0390214
SREK1	0.0389842
ABCB7	0.0389837
ENSSSCG00000025028	0.0389383
PIGU	0.0389359
ENSSSCG00000037869	0.0389351
BDP1	0.0389194
MRPL11	0.0389068
ENSSSCG00000038351	0.0389035
MALT1	0.0388971
DCLRE1C	0.0388921
ND6	0.0388563
PPIG	0.0388238
SLA.DMB	0.0387911
USE1	0.0387868
CLOCK	0.0387425
SRFBP1	0.0387231
SOCS5	0.0386368
PSMC4	0.0386363
XPO6	0.0386247
MAT2B	0.0386219
ECD	0.0386072
ENSSSCG00000017928	0.0385825
SLC4A7	0.038572
CIAO2B	0.0385618
NAGLU	0.0385524
VPS4B	0.0385497
ARF4	0.0385119
SKIV2L	0.038505
PIAS2	0.0385041
ASCC1	0.0384987
FNIP2	0.0384977
DHRS7	0.0384532
ENSSSCG00000001396	0.0384239
SYVN1	0.038419
MRPL55	0.038419
ACP1	0.0384035
PCMT1	0.0383805
TMED9	0.0383246
ENSSSCG00000028458	0.0383226
ENSSSCG00000016376	0.0383146
CMPK2	0.038308
PBXIP1	0.0382858
COMT	0.0382588
NCOR1	0.0382399
TMEM131L	0.038203
ABHD17B	0.0381995
UVRAG	0.0381882
ABRAXAS1	0.0381678
IRF3	0.0381566
CIR1	0.0381469
GRAMD2B	0.0381373
USP10	0.0381114
SPOPL	0.038102
FAM162A	0.0380982
ENSSSCG00000010674	0.0380862
TANGO2	0.0380614
NUP153	0.0380432
EXOSC10	0.0379704
MTPN	0.0379549
MTX2	0.0379327
RBMS1	0.0379062
UQCRC2	0.0378923
HSD17B12	0.0378831
EIF5B	0.0378684
BOD1L1	0.0378137
MAP2K7	0.0378079
ENSSSCG00000038249	0.0377796
CCNL2	0.0377326
PFDN4	0.0377264
NOC2L	0.0376977
WDR74	0.0376964
CHD1	0.0376957
SLC22A17	0.037649
HDGFL3	0.0376479
CDK8	0.0376107
PRRC2B	0.0375886
FUT8	0.0375743
CYBA	0.0375323
GMFB	0.0375268
RF02116	0.0375014
RBM42	0.0374933
CD3D	0.0374412
LRRC8C	0.0374341
ZBTB37	0.0374149
CPD	0.0373711
SERP1	0.0373638
PLA2G4A	0.0373271
ENSSSCG00000016768	0.0373253
PCF11	0.0373126
ENSSSCG00000035561	0.0373024
RRP7A	0.0372742
SARAF	0.0372548
NKTR	0.0372495
RYBP	0.0372394
PNRC2	0.037235
MPHOSPH8	0.037226
ZNF655	0.037223
RSL1D1	0.0372193
ENSSSCG00000027723	0.0371884
ENSSSCG00000007088	0.0371758
PAN2	0.0371754
HOMER2	0.0371739
LAPTM4A	0.0371709
GRB2	0.0371635
ENSSSCG00000027778	0.0371365
ZNF770	0.0370935
EBNA1BP2	0.0370887
KIAA0040	0.0370607
USP5	0.0370527
SERTAD3	0.0369788
LRRC70	0.0369739
OS9	0.0369645
SNX14	0.0369639
SARS	0.0369612
USP15	0.0369568
PSMD11	0.0369047
PELP1	0.0368969
CMAH	0.03683
MRPL12	0.0368154
ABCF1	0.0368098
GLRX2	0.0368089
NSL1	0.0368015
HDAC2	0.0367981
ZFP2	0.0367949
ENSSSCG00000028397	0.0367855
ENSSSCG00000007688	0.0367586
METAP2	0.0367189
SCAPER	0.03667
CTR9	0.0366126
ITSN2	0.0366071
EMG1	0.0365889
ARHGAP25	0.0365671
SECISBP2	0.0365407
ALDOC	0.0365072
FCMR	0.0364844
CHCHD6	0.0364723
FZR1	0.0364426
TFRC	0.0363875
ADD1	0.0363546
CD40LG	0.0363498
ARFGAP2	0.03634
RAB21	0.0362848
BCL2L1	0.0362681
PRXL2A	0.0362526
CIAO1	0.036248
ENSSSCG00000035706	0.0362364
PRDX3	0.0362092
SNRPF	0.0361858
RPAIN	0.0361757
BCL3	0.0360947
RBMX	0.0360804
BUB3	0.0360465
ENSSSCG00000006510	0.0360436
PSAP	0.0360246
MEF2A	0.0360119
WASHC4	0.0360026
STOM	0.0359986
ENSSSCG00000017940	0.0359879
CXCR5	0.0359873
WDR63	0.0359702
HCFC1R1	0.0359679
AATF	0.0359669
CCND3	0.0359649
ENSSSCG00000039331	0.0359608
YJU2	0.0359603
ENSSSCG00000002259	0.0359569
SDF4	0.0359536
C18orf32	0.0359225
ZNF638	0.0358868
RBMX2	0.0358828
ENSSSCG00000002743	0.0358714
ENSSSCG00000012046	0.035867
ELOVL5	0.0358503
ILF2	0.0358355
CD2BP2	0.0358277
SPOCK2	0.0357965
ENSSSCG00000012811	0.035758
NFE2L1	0.0357458
LSG1	0.0357168
VPS25	0.0356883
EPHA1	0.0356774
ENSSSCG00000007098	0.0356767
TAP1	0.0356313
ILKAP	0.0356277
ENSSSCG00000011567	0.0356079
C15orf61	0.0355755
DDOST	0.0355725
COMMD4	0.0355596
PPP2CA	0.0355568
PRR5L	0.035538
ENSSSCG00000036618	0.0355212
DDX60	0.0355162
[truncated: 12,388 more rows]

## Sheet: 21v24_Permutation
Supplementary File 14. Random forest pair-wise analyses of CD2 ɣ𝛿 T-cell cluster. For each model represented below the porcine scRNA-seq cluster IDs compared are shown along with the parameters used and resulting OOB prediction error. Variable importance was assigned by measuring node impurity (Impurity) and using permutations (Permutation). Features that reduced error in predictive accuracy are …
Gene	Permutation
ENSSSCG00000032017	0.0282929
RHEX	0.0177109
SRGN	0.0172575
LGALS1	0.0131797
LCK	0.0126258
CD2	0.0110091
S100A11	0.00805763
S100A6	0.00702334
S100A4	0.0066105
PLAC8	0.00570475
ENSSSCG00000037142	0.00513703
ENSSSCG00000014565	0.00438158
TRAT1	0.00433029
ENSSSCG00000013260	0.00428103
CAPG	0.00422241
FCRL6	0.0038825
ENSSSCG00000023584	0.00342297
NPY	0.00330968
ANXA1	0.0031794
BLK	0.00310203
B2M	0.0030051
IKZF2	0.00281663
SAMSN1	0.00267646
TOX	0.00252474
SMC4	0.00244792
TSPO	0.00236627
CAMK4	0.00227957
S100A10	0.00216452
ENSSSCG00000034914	0.00203496
EOMES	0.0020331
FCER1A	0.00202808
FSCN1	0.00200959
LAPTM5	0.00197522
ENSSSCG00000029596	0.0019012
ITM2B	0.0018237
SELL	0.00163574
ENSSSCG00000026217	0.00157583
ENSSSCG00000037885	0.00152394
PTMA	0.00149949
ENSSSCG00000003042	0.00148421
XCL1	0.0013854
CD52	0.00132913
STMN3	0.00121447
NREP	0.00120166
ENSSSCG00000017032	0.00118924
ENSSSCG00000005453	0.00117539
KIT	0.00115349
ENSSSCG00000033734	0.0011427
ENSSSCG00000040155	0.00112833
VIM	0.00111292
UCP2	0.00110153
TIMP1	0.00104886
HMGN3	0.000984429
ABLIM1	0.000969011
ENSSSCG00000000635	0.000919069
TAGAP	0.000916732
ENSSSCG00000004970	0.000911552
EMP3	0.000890733
CALM1	0.000842072
ENSSSCG00000005095	0.00083398
PIK3AP1	0.00082587
ENSSSCG00000039658	0.000819615
RCAN3	0.000798751
MATK	0.000791824
ENSSSCG00000031088	0.00076249
ARHGAP5	0.000736212
RHOH	0.000723505
SGCA	0.000716275
ARHGDIB	0.000695197
RPL23	0.000686051
GATA3	0.000669809
SH3BGRL3	0.000650712
CD6	0.000645501
COTL1	0.000609579
CGA	0.000608483
CCR9	0.000602375
STK17B	0.000593281
LTB	0.000590565
ENSSSCG00000008032	0.00056985
PPP1CC	0.000566835
ENSSSCG00000013720	0.000561417
ENSSSCG00000003930	0.000551034
IL6R	0.000539575
PSIP1	0.000526463
ENSSSCG00000003691	0.000525942
GNA15	0.000501457
MAF	0.000476506
TCF7	0.000473706
TMSB10	0.000471434
TST	0.000460345
UBASH3B	0.000459891
MISP3	0.000451179
GYPC	0.000447218
SAMHD1	0.000435015
C15orf48	0.000428064
CD247	0.000421625
F2R	0.000419868
CCR7	0.000415218
ITGA4	0.000412209
HPSE	0.000410328
ADGRG1	0.000401697
PLEKHF2	0.000401473
VCL	0.000399569
PLVAP	0.000398263
NAPSA	0.000393164
IL2RB	0.000392774
ATP6V1G1	0.000388637
CD63	0.000386476
UBAC2	0.000380519
RPS11	0.00037226
FUT7	0.000371171
DGKZ	0.000370435
GSN	0.000365978
SLC25A24	0.000360036
EVL	0.000357193
HES1	0.000356345
PARK7	0.000335447
FAM49B	0.000333205
SASH3	0.000325593
PVRIG	0.000324288
DGKA	0.000320487
FES	0.000312478
ENSSSCG00000038507	0.000311944
HCST	0.000310515
ITGB1	0.00030917
ENSSSCG00000037566	0.00030791
MGST1	0.000304763
GLIPR2	0.000302326
TPM1	0.00029479
ARPC1B	0.000294274
KRTCAP2	0.000289818
RPL11	0.000288355
ENSSSCG00000034617	0.000287497
ENSSSCG00000034448	0.000286507
MYL6	0.000282546
OTULINL	0.000268281
DCK	0.000266287
RPL10	0.000263267
FAM89A	0.000258608
RESF1	0.000246303
LCP1	0.000245971
ENSSSCG00000003253	0.000243421
GSTA4	0.000242101
ENSSSCG00000033987	0.000235121
FAM129A	0.00023457
LAX1	0.000231108
ENSSSCG00000027790	0.000229504
TRDC	0.000228886
TMEM173	0.000228796
ENSSSCG00000001341	0.000228624
PTPRC	0.000226644
LY6D	0.00022471
CYBRD1	0.000217841
CBLB	0.000214702
STMN1	0.000210994
BZW1	0.000209562
KLRK1	0.000205529
CXCR4	0.000202636
THEMIS	0.000201865
RASGRP1	0.000197844
SNTB2	0.000196759
ENO1	0.000194235
H3F3A	0.000193843
ENSSSCG00000037595	0.000189565
DPP4	0.00018749
RPLP2	0.000183058
STARD4	0.000182905
ARF6	0.00018278
FAM171B	0.000182099
ENSSSCG00000001229	0.000179452
PLP2	0.000178963
RPL39	0.000178412
PECAM1	0.000175905
HSP90AB1	0.000170772
ITGAM	0.000169455
FYB1	0.000168962
IRF5	0.000167022
IL18R1	0.000166726
RPS20	0.000166545
CAT	0.0001641
UPP1	0.000162894
PNISR	0.000162616
ZAP70	0.000161524
ZNF683	0.000161298
MIF	0.000161291
ANXA5	0.000160985
RACK1	0.000157846
ENSSSCG00000003903	0.000154995
XBP1	0.000154297
TNFSF14	0.000149004
SOD1	0.000148322
PKIG	0.000146435
DUSP1	0.000139988
COX1	0.000139973
FADS3	0.000138597
CTSW	0.000137529
CST3	0.000137273
YWHAQ	0.000137071
ENSSSCG00000006395	0.000136956
LPAR6	0.000136464
ANKRD10	0.000136207
ETS1	0.000135887
CCNI	0.000134281
VAMP8	0.000131835
FLNB	0.00013079
ENSSSCG00000033721	0.000130343
GMPR	0.000129939
RORA	0.000129416
ENSSSCG00000037475	0.000128598
ENSSSCG00000036013	0.000127484
ENSSSCG00000012119	0.000127261
PDCD1	0.000126349
RPL35	0.000126082
HMOX2	0.000125758
ITM2C	0.00012524
ENSSSCG00000026140	0.000124513
ENSSSCG00000026064	0.000124309
CCNG2	0.000123913
MRPL57	0.000122002
ENSSSCG00000033090	0.000120321
CRLF3	0.000119872
DAPL1	0.000119678
ENSSSCG00000039544	0.000119319
RPS21	0.000118209
H2AFV	0.00011727
PHACTR2	0.000116199
MARCKS	0.000115014
WAS	0.000114122
ENSSSCG00000008433	0.00011381
THOC5	0.000113734
BTG1	0.000112263
EEF1B2	0.000110488
GPR183	0.000110185
ENSSSCG00000017509	0.000110117
ENSSSCG00000032591	0.000109464
HERC5	0.000107811
SYTL3	0.000107628
DDAH2	0.000106529
ENSSSCG00000030197	0.000106431
RPS9	0.000105892
ENSSSCG00000007355	0.000105572
ENSSSCG00000037364	0.000105546
NEIL2	0.000105213
LNPEP	0.000104197
PIK3R1	0.000103842
SEC11C	0.000102738
TRIM44	0.000102672
HVCN1	0.000101904
C1orf21	0.000100974
ENSSSCG00000040294	0.000100897
GZMB	0.000100819
ENSSSCG00000014540	0.00010077
ENSSSCG00000027491	0.000100755
DDIT4	9.99673e-05
SLC25A6	9.68507e-05
CCR4	9.68417e-05
SOX4	9.59721e-05
RTRAF	9.58045e-05
RPS14	9.54731e-05
SNRPN	9.53854e-05
PTPN22	9.36208e-05
TCF3	9.28836e-05
SPCS3	9.27671e-05
KDM6B	9.27039e-05
ARPC5L	9.22742e-05
FGL2	9.22209e-05
IL21R	8.81569e-05
PNRC1	8.80392e-05
ENSSSCG00000014855	8.75941e-05
CHIC2	8.67826e-05
ENSSSCG00000033019	8.62176e-05
ENSSSCG00000035080	8.60744e-05
ENSSSCG00000036296	8.57703e-05
ENSSSCG00000003520	8.54027e-05
GPR18	8.42178e-05
PDAP1	8.40777e-05
PABPN1	8.35778e-05
HSPA5	8.34838e-05
TFDP2	8.34037e-05
HNRNPH1	8.30106e-05
PPP2R5C	8.18319e-05
FBL	8.17933e-05
STK26	8.05092e-05
EMILIN2	8.01289e-05
METTL27	7.97912e-05
COX7C	7.9598e-05
ACP5	7.94063e-05
RPS5	7.92838e-05
TRAF3IP3	7.89719e-05
ENSSSCG00000031773	7.88832e-05
ENSSSCG00000006418	7.78745e-05
NCK1	7.7464e-05
ENSSSCG00000016737	7.72369e-05
ENSSSCG00000009239	7.57026e-05
MRPS9	7.52254e-05
ENSSSCG00000039740	7.49213e-05
CAMK2N1	7.41518e-05
RGS10	7.41099e-05
PDGFB	7.39607e-05
SLC11A2	7.39346e-05
FGR	7.33182e-05
CLINT1	7.3125e-05
RAP1B	7.29158e-05
RIN3	7.21931e-05
ANAPC16	7.17391e-05
ENSSSCG00000000500	7.07102e-05
COX6C	6.9769e-05
PLAAT3	6.96241e-05
ENSSSCG00000004414	6.91707e-05
VASP	6.89958e-05
ELK3	6.8847e-05
ND5	6.87317e-05
HNRNPC	6.78396e-05
BAZ1A	6.69717e-05
HNRNPDL	6.68426e-05
SNRK	6.63007e-05
IKZF3	6.60016e-05
EMB	6.5743e-05
PARVG	6.57392e-05
PYCARD	6.52921e-05
ENSSSCG00000035768	6.52469e-05
ENSSSCG00000003236	6.5147e-05
SUMO2	6.50885e-05
ENSSSCG00000027573	6.50831e-05
RFXANK	6.50023e-05
SRRM2	6.49502e-05
WDR6	6.49305e-05
ENSSSCG00000013889	6.47251e-05
LACTB2	6.46998e-05
HMGA1	6.46413e-05
ARL5A	6.44734e-05
ENSSSCG00000001075	6.42709e-05
ENSSSCG00000029830	6.41574e-05
TPM4	6.41536e-05
PPP3CA	6.41487e-05
H3F3B	6.40875e-05
ENSSSCG00000013568	6.40827e-05
EEF1AKMT1	6.40164e-05
JARID2	6.39701e-05
POP7	6.38789e-05
ENSSSCG00000024974	6.34383e-05
ENHO	6.20929e-05
ENSSSCG00000031278	6.18802e-05
ENSSSCG00000011234	6.13641e-05
RHOQ	6.10628e-05
ASAP1	6.06021e-05
ENSSSCG00000010734	6.03808e-05
RASL10B	6.02092e-05
RCN2	6.01722e-05
ENSSSCG00000039046	6.01698e-05
ZNF395	5.98604e-05
FLI1	5.96733e-05
TIAM1	5.94465e-05
B3GNT2	5.89241e-05
CCL5	5.87414e-05
EPHB6	5.84257e-05
RPL17.C18orf32	5.69176e-05
ENSSSCG00000035706	5.64101e-05
CTSB	5.63193e-05
PNN	5.6231e-05
UBB	5.59384e-05
KDM5B	5.58506e-05
SMAD2	5.58162e-05
RIT1	5.57601e-05
GTF2I	5.54746e-05
ROCK1	5.54122e-05
ENSSSCG00000038825	5.54044e-05
BIN1	5.53504e-05
YBX3	5.53173e-05
TMEM9	5.52868e-05
SNX18	5.51526e-05
CTNNB1	5.48661e-05
NDUFA13	5.47513e-05
AGTRAP	5.44842e-05
ENSSSCG00000002505	5.42364e-05
TTYH3	5.41302e-05
CCDC69	5.38545e-05
ACTG1	5.30527e-05
NOP53	5.213e-05
SUPT4H1	5.19243e-05
CENPH	5.17886e-05
HNRNPD	5.17716e-05
ERBIN	5.16887e-05
YWHAZ	5.15845e-05
PTPN1	5.14608e-05
TMED4	5.14183e-05
ITGB7	5.1335e-05
AHR	5.10767e-05
HSPB1	5.09642e-05
RHBDL2	5.09486e-05
BRD4	5.08725e-05
CD8A	5.08459e-05
ENSSSCG00000035955	5.07792e-05
STAT1	5.06147e-05
COX3	5.05392e-05
IFNAR1	5.04587e-05
CTR9	5.04459e-05
C12orf75	5.04017e-05
ENSSSCG00000008576	5.03977e-05
OAZ1	5.0326e-05
COPS6	5.02822e-05
ASPSCR1	4.99767e-05
ME2	4.97496e-05
FOXS1	4.97166e-05
FKBP8	4.94838e-05
ENSSSCG00000037775	4.93088e-05
H2AFY	4.83048e-05
HMGN4	4.76947e-05
NSD3	4.76102e-05
RNF19A	4.76043e-05
ENSSSCG00000000657	4.75503e-05
RAB18	4.70688e-05
REL	4.69291e-05
AQP3	4.68375e-05
CD3G	4.67875e-05
ATP6V1E1	4.67744e-05
RNF44	4.66781e-05
RPL5	4.66552e-05
DHRS7	4.6653e-05
KLHL15	4.65979e-05
B4GALT1	4.65864e-05
RER1	4.65514e-05
ATP5ME	4.65243e-05
MYO1F	4.63885e-05
GPX1	4.63434e-05
RAB19	4.63169e-05
ENSSSCG00000006376	4.62556e-05
COQ8B	4.62347e-05
FTL	4.62321e-05
ENSSSCG00000039217	4.60886e-05
DNMT3A	4.58425e-05
NDUFB4	4.57412e-05
TNRC6B	4.57004e-05
AKT2	4.53492e-05
ENSSSCG00000012166	4.52721e-05
LRRC42	4.48601e-05
RCSD1	4.46345e-05
ND2	4.43021e-05
ATP6V1F	4.42925e-05
MNDA	4.39561e-05
ENSSSCG00000023792	4.33628e-05
SIGIRR	4.26317e-05
ACSS3	4.22889e-05
RPS6	4.22282e-05
SNAP29	4.22249e-05
PDGFA	4.21317e-05
ITGB2	4.19072e-05
EEF2	4.1888e-05
ENSSSCG00000012403	4.16815e-05
OGA	4.15562e-05
ENSSSCG00000010203	4.15238e-05
ELP5	4.14845e-05
CASS4	4.14685e-05
EZR	4.14514e-05
IAH1	4.13788e-05
IL9R	4.13522e-05
ENSSSCG00000009327	4.13064e-05
PSMD1	4.12812e-05
MAP1LC3B	4.1271e-05
OCIAD1	4.12631e-05
ENSSSCG00000007435	4.11587e-05
ENSSSCG00000039706	4.0831e-05
IL10RA	4.07372e-05
EMC6	4.0683e-05
BEX3	4.06529e-05
TMCO1	4.03691e-05
SLC25A36	4.01627e-05
PDCD4	4.01398e-05
ENSSSCG00000035507	3.99774e-05
BIRC3	3.95608e-05
FDFT1	3.92314e-05
NDFIP1	3.88512e-05
RPIA	3.87077e-05
HSD17B10	3.85542e-05
EIF4G2	3.84107e-05
REV1	3.78372e-05
CD3E	3.78358e-05
ENSSSCG00000033733	3.77793e-05
BCL7A	3.77154e-05
ENSSSCG00000012916	3.76646e-05
TRAPPC6A	3.75922e-05
TBC1D20	3.75404e-05
CCT5	3.74201e-05
ACTR6	3.73862e-05
ENSSSCG00000014031	3.73822e-05
RPL26	3.73397e-05
TAPBPL	3.73223e-05
UBXN4	3.72837e-05
ENSSSCG00000000611	3.72744e-05
HSD11B1L	3.72473e-05
AP2B1	3.72455e-05
LDLRAD4	3.72319e-05
STK4	3.7196e-05
CAP1	3.71806e-05
EVI2B	3.71723e-05
RPL6	3.71654e-05
ENSSSCG00000001063	3.71434e-05
HIST1H1E	3.70897e-05
EIF3I	3.70802e-05
ZC3H12D	3.70758e-05
RIOK3	3.69856e-05
RPS4X	3.69655e-05
ENSSSCG00000036491	3.68391e-05
CSRP1	3.68035e-05
ENSSSCG00000008898	3.67601e-05
NFKBIA	3.67494e-05
EIF1B	3.67435e-05
APBB1	3.66995e-05
RPL7A	3.66639e-05
PKM	3.66546e-05
ENSSSCG00000038392	3.66059e-05
PSMA3	3.66033e-05
ARHGEF2	3.65419e-05
TTC14	3.64704e-05
TXNL4A	3.64557e-05
ACTB	3.64533e-05
FAM32A	3.63493e-05
ALDOC	3.62857e-05
HNRNPM	3.62003e-05
ENSSSCG00000014267	3.61798e-05
TRAF5	3.61379e-05
NUCKS1	3.5972e-05
YPEL3	3.59215e-05
HNRNPLL	3.5826e-05
CHMP6	3.58216e-05
MRPL40	3.54622e-05
RPS27	3.50133e-05
CLDND1	3.44809e-05
ENSSSCG00000034868	3.36951e-05
KXD1	3.33439e-05
NDUFS5	3.32764e-05
EIF2A	3.31974e-05
SRI	3.31545e-05
RNASEH2B	3.30699e-05
SERPINB1	3.30185e-05
SETX	3.30103e-05
ENSSSCG00000017555	3.30076e-05
SPG21	3.29343e-05
PTGES3	3.29097e-05
TMEM107	3.28866e-05
ARHGDIA	3.28556e-05
ENSSSCG00000039249	3.28512e-05
ENSSSCG00000037399	3.27963e-05
ENSSSCG00000031912	3.27493e-05
ETS2	3.27327e-05
PTPN12	3.27191e-05
PIGU	3.26598e-05
MAPKAP1	3.26542e-05
RPS18	3.25808e-05
LAMTOR4	3.25382e-05
HIF1A	3.25257e-05
TSC22D4	3.25223e-05
CMAS	3.24834e-05
ITGA5	3.23882e-05
CSK	3.23797e-05
IL7R	3.23766e-05
TIMM17B	3.2333e-05
SRP14	3.23296e-05
ENSSSCG00000024588	3.23143e-05
POLR1D	3.23035e-05
JUP	3.2284e-05
ENSSSCG00000026719	3.22581e-05
ARFGAP3	3.22247e-05
ENSSSCG00000010795	3.21963e-05
CCNL1	3.21854e-05
SF3B6	3.21708e-05
FOXN3	3.2135e-05
ARPP21	3.21342e-05
OXLD1	3.21057e-05
BAZ2B	3.20581e-05
MFAP1	3.20246e-05
SSR2	3.20191e-05
DNAJC5	3.19951e-05
SLC35A5	3.19787e-05
ITPRID2	3.19689e-05
INSIG1	3.19683e-05
ABCE1	3.19413e-05
ENSSSCG00000036603	3.19346e-05
ANXA2	3.18125e-05
ARPC5	3.1803e-05
PSMA4	3.1793e-05
SMIM7	3.17753e-05
TUFM	3.17641e-05
ENSSSCG00000036716	3.16336e-05
ATF4	3.16267e-05
DDX5	3.16074e-05
XPO1	3.16027e-05
JAML	3.15935e-05
VCP	3.15166e-05
ORAI3	3.14103e-05
ENSSSCG00000005481	3.14012e-05
PHF14	3.1378e-05
TMED9	3.13485e-05
TPT1	3.10327e-05
H6PD	3.05934e-05
RALGPS2	2.88385e-05
RFC2	2.88136e-05
WFDC2	2.88126e-05
CCNG1	2.87756e-05
AFTPH	2.8658e-05
LARP4B	2.85714e-05
DPH3	2.85637e-05
MRPL12	2.85368e-05
ERP29	2.84148e-05
CD44	2.84133e-05
TNFSF10	2.83781e-05
PLIN3	2.83019e-05
ELOVL5	2.83019e-05
DDX24	2.82235e-05
CCDC32	2.82196e-05
GOLPH3L	2.82152e-05
ENSSSCG00000010006	2.82047e-05
LAMTOR2	2.81786e-05
TUBA4A	2.81521e-05
TGIF1	2.81476e-05
PSMB4	2.81226e-05
ENSSSCG00000004666	2.8103e-05
THOC2	2.80662e-05
SELENOS	2.80586e-05
RAB2A	2.80495e-05
FIBP	2.80486e-05
ENSSSCG00000013596	2.79818e-05
ENSSSCG00000000663	2.79662e-05
FOXK1	2.79537e-05
MVP	2.79297e-05
GNB2	2.79192e-05
RAB27A	2.79181e-05
ORMDL3	2.7907e-05
ATXN7L3	2.78809e-05
CNOT6L	2.7866e-05
ENSSSCG00000014618	2.78422e-05
SSB	2.78341e-05
CNP	2.7804e-05
SS18	2.77825e-05
PPIF	2.77755e-05
MTF2	2.77648e-05
CCNDBP1	2.77612e-05
CAMTA2	2.7732e-05
PSMC4	2.77313e-05
DCLRE1C	2.77019e-05
CCS	2.76928e-05
ENSSSCG00000040529	2.76879e-05
DAPK2	2.76565e-05
RPL9	2.76549e-05
NXT2	2.76498e-05
PRKD3	2.76325e-05
TCEA1	2.76299e-05
PDCD5	2.75919e-05
GMPS	2.75772e-05
POLR2I	2.75742e-05
ANKRD12	2.75686e-05
PDE9A	2.75654e-05
DDX1	2.75549e-05
SREK1	2.75371e-05
CD28	2.75157e-05
FCSK	2.74672e-05
ENSSSCG00000000377	2.74671e-05
RAB7A	2.74614e-05
HERPUD1	2.74607e-05
RBM25	2.7447e-05
TBX21	2.7447e-05
ENSSSCG00000016263	2.74245e-05
ADNP	2.73723e-05
GBP2	2.73639e-05
CD226	2.73613e-05
SH2D1A	2.7349e-05
RAP2A	2.73425e-05
STK24	2.73203e-05
TSN	2.72727e-05
DNAJC9	2.72508e-05
REEP5	2.71393e-05
TVP23C	2.70642e-05
BROX	2.70488e-05
ATP5MD	2.70379e-05
GPR55	2.7027e-05
NAXE	2.70259e-05
LEF1	2.69743e-05
ENSSSCG00000017928	2.69536e-05
PTOV1	2.69525e-05
PIAS1	2.68837e-05
TPM3	2.68303e-05
ENSSSCG00000013878	2.68201e-05
MRPL48	2.6196e-05
SLC9A3R1	2.60403e-05
ENSSSCG00000027348	2.57659e-05
S100A1	2.5632e-05
RRP15	2.55834e-05
DOCK8	2.44817e-05
LY9	2.43442e-05
RPL22	2.41859e-05
EIF1AD	2.4157e-05
DPF2	2.40964e-05
UQCRQ	2.4063e-05
ENSSSCG00000002036	2.39696e-05
ENSSSCG00000017239	2.39456e-05
SNF8	2.39234e-05
PSMD2	2.3913e-05
NSMCE4A	2.38616e-05
PRKAR2B	2.38095e-05
TOPBP1	2.3753e-05
ENSSSCG00000006360	2.37433e-05
THOC7	2.37387e-05
RAPGEF2	2.37171e-05
IFI35	2.36964e-05
SFT2D1	2.36807e-05
ENSSSCG00000001407	2.36003e-05
ASB9	2.35904e-05
CXXC5	2.35849e-05
ATP5PB	2.35712e-05
USP10	2.35463e-05
MTHFD2	2.35425e-05
ENSSSCG00000013366	2.35379e-05
COIL	2.35278e-05
ENSSSCG00000027905	2.35185e-05
RALY	2.35084e-05
TNFSF11	2.35e-05
LMO4	2.34789e-05
CKB	2.34731e-05
ZNRF1	2.3453e-05
RASSF3	2.34447e-05
HNRNPH3	2.34367e-05
ZNF217	2.34305e-05
MRPL35	2.34284e-05
SH3BP5	2.34192e-05
STXBP2	2.33679e-05
CMSS1	2.33433e-05
NAA10	2.33357e-05
ELF4	2.33331e-05
BCL3	2.33252e-05
ENSSSCG00000014075	2.33252e-05
TAF3	2.33239e-05
ENSSSCG00000000640	2.33125e-05
TMED10	2.32922e-05
MCRIP1	2.32894e-05
DDX39B	2.32824e-05
ZBTB18	2.32803e-05
NUB1	2.32793e-05
RASA1	2.32645e-05
RIC3	2.32602e-05
FAM78A	2.32539e-05
PTP4A1	2.32535e-05
SDE2	2.3219e-05
UBC	2.32038e-05
ENSSSCG00000007031	2.32007e-05
TUBB2B	2.31904e-05
CBX4	2.31813e-05
DPPA5	2.31797e-05
KLHDC3	2.31732e-05
ZCCHC17	2.31605e-05
PRR5	2.31481e-05
ENSSSCG00000011290	2.3144e-05
NONO	2.31306e-05
SNX6	2.31268e-05
PTPN7	2.31209e-05
ELF1	2.31141e-05
GSDMD	2.31117e-05
SCARB2	2.30989e-05
UBE2J1	2.30956e-05
SKAP1	2.30947e-05
IPO9	2.30799e-05
EIF4A1	2.30771e-05
ZNF609	2.30691e-05
KLF2	2.30667e-05
SAMD9	2.30566e-05
ENSSSCG00000036114	2.30307e-05
TMEM87B	2.30279e-05
NCK2	2.3025e-05
ENSSSCG00000015040	2.30245e-05
TM6SF1	2.30224e-05
ENSSSCG00000025525	2.30216e-05
SLAIN1	2.30154e-05
ENSSSCG00000024776	2.30098e-05
ADGRE5	2.29986e-05
DPM2	2.29876e-05
YIPF4	2.29829e-05
EIF1AX	2.29822e-05
BRIX1	2.29794e-05
ENSSSCG00000001455	2.29415e-05
ANKRD27	2.29221e-05
ACO2	2.29202e-05
GPR171	2.29096e-05
SGTA	2.29017e-05
MRPL38	2.28815e-05
CUEDC2	2.28731e-05
ENSSSCG00000035869	2.28509e-05
THYN1	2.28461e-05
USE1	2.28304e-05
ENSSSCG00000011121	2.28267e-05
ENSSSCG00000016211	2.28206e-05
BAZ1B	2.28204e-05
ERO1B	2.27998e-05
COMMD4	2.27935e-05
FAM120A	2.27882e-05
SELENOF	2.27844e-05
BID	2.27841e-05
RORC	2.2779e-05
PSTPIP1	2.27605e-05
RTF1	2.27346e-05
SUCLG2	2.27268e-05
PPP1R18	2.27129e-05
XPO6	2.27089e-05
BAZ2A	2.26973e-05
SLCO3A1	2.26914e-05
C19orf53	2.26892e-05
NDUFV2	2.26863e-05
ENSSSCG00000002003	2.26683e-05
ABR	2.26564e-05
MTX2	2.26555e-05
MORF4L1	2.26317e-05
C6orf62	2.2597e-05
ST8SIA1	2.25857e-05
REXO2	2.25686e-05
UBE2G1	2.25511e-05
ENSSSCG00000016711	2.25259e-05
ELAVL1	2.25164e-05
B3GNT3	2.24215e-05
CDK9	2.23861e-05
DBI	2.23758e-05
ENSSSCG00000037299	2.23698e-05
PSMB8	2.23359e-05
RNPEP	2.23328e-05
ERH	2.23321e-05
NECAP2	2.22222e-05
ENSSSCG00000033918	2.21733e-05
ENSSSCG00000014280	2.20755e-05
NDUFB8	2.20507e-05
RPL3	2.19276e-05
MPI	2.15983e-05
ENSSSCG00000022176	2.10717e-05
ENSSSCG00000025928	2.00527e-05
HNRNPK	1.97943e-05
MTLN	1.96078e-05
ENSSSCG00000002004	1.94758e-05
PCSK7	1.94647e-05
S100A13	1.94521e-05
CMTM8	1.94175e-05
TBC1D10C	1.93291e-05
TSC22D3	1.93106e-05
BUD13	1.92824e-05
ENSSSCG00000016096	1.92183e-05
EHMT1	1.92004e-05
GSE1	1.91704e-05
HSD17B14	1.91696e-05
TRPV5	1.91184e-05
CFL1	1.91094e-05
ENSSSCG00000013315	1.90785e-05
COPZ1	1.89991e-05
BBS7	1.89799e-05
IFI6	1.89732e-05
GSTO1	1.89686e-05
VARS	1.89573e-05
XYLT2	1.89573e-05
NDUFB6	1.89261e-05
RDX	1.8913e-05
C1orf35	1.89047e-05
ENSSSCG00000016100	1.89047e-05
MRPL11	1.88416e-05
ENSSSCG00000001398	1.88393e-05
SMPD2	1.88231e-05
CCDC181	1.88093e-05
C12orf45	1.88084e-05
UBA1	1.88068e-05
ENSSSCG00000007978	1.88053e-05
PHF21A	1.88021e-05
PTPRE	1.87945e-05
MRPS24	1.87891e-05
CIAO2B	1.87831e-05
EIPR1	1.87793e-05
LRPAP1	1.87772e-05
AGPS	1.87612e-05
ISCU	1.87438e-05
MT3	1.87354e-05
NKIRAS2	1.87354e-05
SENP2	1.87227e-05
RNMT	1.87121e-05
FASN	1.86918e-05
CEP192	1.86633e-05
DNAJB1	1.86625e-05
PIP4K2A	1.86607e-05
MLST8	1.86605e-05
TPM2	1.86593e-05
FAM210A	1.86545e-05
TBCA	1.86512e-05
ST3GAL6	1.86496e-05
LRRC70	1.86392e-05
CD9	1.8631e-05
TMEM97	1.86297e-05
DTX3L	1.86268e-05
MIPEP	1.86201e-05
GRAMD2B	1.86158e-05
ENSSSCG00000031169	1.86083e-05
ENSSSCG00000012238	1.85994e-05
SNU13	1.85984e-05
RPSA	1.85983e-05
TCEA2	1.85942e-05
CWF19L1	1.85867e-05
IFT80	1.85864e-05
DDT	1.85858e-05
SMIM4	1.8574e-05
NDUFB9	1.85692e-05
TCF12	1.85615e-05
FAM118B	1.85615e-05
CMAH	1.85547e-05
MEPCE	1.85532e-05
ABCB7	1.85506e-05
RPL34	1.85481e-05
CHCHD1	1.85462e-05
TNIP1	1.85402e-05
ACSS1	1.85239e-05
TRPC3	1.85185e-05
ORC6	1.8518e-05
NIPBL	1.85164e-05
SLIRP	1.85141e-05
LFNG	1.85013e-05
DPYD	1.84991e-05
CFAP36	1.84984e-05
ENSSSCG00000007749	1.84974e-05
GLRX3	1.8491e-05
CTCF	1.849e-05
ENSSSCG00000034527	1.84887e-05
NAA25	1.84793e-05
PLEK	1.84551e-05
ENSSSCG00000027565	1.84538e-05
THRAP3	1.84526e-05
RASSF2	1.84453e-05
OTULIN	1.84452e-05
SSR1	1.84336e-05
CPSF6	1.84332e-05
ENSSSCG00000008222	1.84332e-05
MTSS1	1.84332e-05
CUL3	1.8429e-05
EML4	1.84224e-05
RAP1GAP2	1.84135e-05
MYB	1.84026e-05
USP15	1.84014e-05
LAT	1.83944e-05
ENSSSCG00000038364	1.83908e-05
ENSSSCG00000035611	1.83739e-05
DDX42	1.83728e-05
SDHD	1.83586e-05
GPSM3	1.83566e-05
SLC43A2	1.83489e-05
ADPRHL2	1.83486e-05
MON1B	1.83419e-05
INTS11	1.83317e-05
CENPC	1.83245e-05
FCGRT	1.83234e-05
TMEM123	1.83202e-05
ENSSSCG00000037187	1.83186e-05
MYSM1	1.83173e-05
AKR1A1	1.83083e-05
ENSSSCG00000032748	1.83066e-05
RNF114	1.83066e-05
ND1	1.83001e-05
DCXR	1.8298e-05
VPS52	1.82893e-05
MAP4K4	1.82866e-05
ZNF300	1.82759e-05
LY96	1.82706e-05
CDC123	1.827e-05
MINDY2	1.82653e-05
ACVR2A	1.82648e-05
BPI	1.82566e-05
ST3GAL2	1.82492e-05
PSMD11	1.82428e-05
NSUN2	1.82351e-05
ANKRD44	1.82321e-05
RNF25	1.82287e-05
LDHD	1.82277e-05
GTF2H5	1.82242e-05
RBBP6	1.82094e-05
HSBP1	1.82077e-05
ULK2	1.82037e-05
SH3KBP1	1.82021e-05
RENBP	1.82005e-05
RBM18	1.81917e-05
PCOLCE	1.81818e-05
ENSSSCG00000008061	1.81796e-05
EDF1	1.81742e-05
OTUD6B	1.81719e-05
CBL	1.81665e-05
DNAJC15	1.81664e-05
DERA	1.81644e-05
RNASEH2C	1.81621e-05
ENSSSCG00000027723	1.81515e-05
PRRC2C	1.81488e-05
KDELR1	1.81435e-05
PRDX2	1.81434e-05
TAB2	1.81407e-05
PPIB	1.81406e-05
SNRPA	1.81406e-05
PSEN2	1.81406e-05
MRPL20	1.8124e-05
ATRX	1.81063e-05
RASGRP2	1.81028e-05
ARFRP1	1.80995e-05
ATF1	1.80893e-05
CNST	1.80791e-05
RSL24D1	1.80598e-05
SPAG9	1.80595e-05
PSMG3	1.80587e-05
EPRS	1.80524e-05
NRDC	1.80478e-05
ENSSSCG00000016262	1.80389e-05
NIPSNAP3B	1.80358e-05
DYNLRB1	1.80337e-05
TNNI2	1.80264e-05
LZTR1	1.79775e-05
CEP170	1.79447e-05
POLR2K	1.79426e-05
YARS	1.79396e-05
ENSSSCG00000039731	1.79272e-05
MED7	1.79248e-05
CAPN10	1.78675e-05
CUL5	1.78594e-05
ARHGEF3	1.7839e-05
HDGF	1.78322e-05
ENSSSCG00000009128	1.78174e-05
DYNLT3	1.78126e-05
ANGEL2	1.77983e-05
DGUOK	1.77966e-05
ENSSSCG00000004489	1.77884e-05
UQCR10	1.77806e-05
SLC35C2	1.77749e-05
CTSH	1.77629e-05
GALNT11	1.77567e-05
FAM210B	1.77096e-05
PELO	1.77029e-05
TMEM120A	1.76994e-05
TRIM38	1.76145e-05
ENSSSCG00000023126	1.75987e-05
ZC3H13	1.75963e-05
ISG15	1.75939e-05
ENSSSCG00000022246	1.7316e-05
NDUFV1	1.7316e-05
PRDX6	1.72737e-05
ENSSSCG00000027826	1.70563e-05
DNAJA1	1.70078e-05
INO80C	1.66783e-05
CYTB	1.52767e-05
SF3B5	1.49122e-05
DDA1	1.48922e-05
SESN3	1.48515e-05
IFI44L	1.4635e-05
CDK10	1.46288e-05
PPP2CA	1.4621e-05
RAP2B	1.45985e-05
NR4A2	1.45631e-05
TEC	1.45631e-05
ENSSSCG00000021738	1.45278e-05
CHSY1	1.45089e-05
ENOSF1	1.44578e-05
AICDA	1.44479e-05
JADE1	1.44347e-05
ESS2	1.44237e-05
NR1D2	1.44231e-05
ENSSSCG00000009792	1.44231e-05
ENSSSCG00000020830	1.44229e-05
KPNB1	1.44209e-05
PCBP2	1.44122e-05
MAPK6	1.43988e-05
PSMB3	1.4379e-05
FAM214B	1.43402e-05
CLTA	1.43378e-05
ENSSSCG00000025499	1.43353e-05
SLU7	1.43312e-05
MLLT6	1.43223e-05
PFDN1	1.43198e-05
GADD45A	1.43117e-05
ENSSSCG00000031897	1.43114e-05
HSP90AA1	1.43005e-05
AIDA	1.42864e-05
UBE2Z	1.42859e-05
IP6K1	1.42857e-05
2021-03-02	1.42857e-05
MAN2A1	1.42857e-05
MRPL9	1.42857e-05
NKTR	1.42783e-05
ADCY7	1.42748e-05
SRSF10	1.42748e-05
EXOSC1	1.42635e-05
NTPCR	1.42518e-05
ENSSSCG00000032003	1.42496e-05
MAP4K1	1.4241e-05
FERMT3	1.42386e-05
ENSSSCG00000013721	1.42335e-05
POLR2E	1.42311e-05
API5	1.42085e-05
PSMC5	1.42077e-05
GEMIN5	1.42077e-05
CCNB1IP1	1.41915e-05
NIT2	1.41871e-05
TCTA	1.41844e-05
KPNA2	1.41844e-05
MSL1	1.41815e-05
RTF2	1.41807e-05
ENSSSCG00000027840	1.4178e-05
CDKN2AIPNL	1.41737e-05
RABAC1	1.41712e-05
ENSSSCG00000006870	1.41707e-05
NARS	1.41672e-05
ENSSSCG00000030295	1.41656e-05
TNFAIP8	1.41613e-05
PRRC2B	1.41524e-05
PGGHG	1.41509e-05
THOP1	1.41509e-05
ENSSSCG00000037431	1.41509e-05
ND6	1.41509e-05
LCN2	1.4146e-05
DRG2	1.41401e-05
ZNF358	1.41312e-05
URM1	1.41289e-05
MRPS15	1.41228e-05
MARS	1.41216e-05
ASPH	1.41215e-05
SLC31A1	1.41199e-05
ERGIC1	1.41183e-05
LHPP	1.41176e-05
M6PR	1.41176e-05
PSMD13	1.41152e-05
ZFAND2B	1.41127e-05
ENSSSCG00000007088	1.40973e-05
PGM1	1.40972e-05
IFI30	1.4094e-05
ENSSSCG00000006363	1.40935e-05
PIAS2	1.40884e-05
ENSSSCG00000036622	1.40878e-05
ENSSSCG00000008452	1.40851e-05
NUDCD3	1.40845e-05
RRNAD1	1.40845e-05
RAB24	1.40843e-05
ENSSSCG00000010104	1.40824e-05
OGDH	1.40817e-05
EXOSC8	1.40693e-05
TSNAX	1.40666e-05
IBA57	1.40515e-05
ZNF26	1.40515e-05
RMND5A	1.40515e-05
ATP6AP2	1.40515e-05
BAG1	1.40515e-05
BAMBI	1.40515e-05
ENSSSCG00000037324	1.40515e-05
PCMT1	1.40502e-05
TOMM7	1.40466e-05
OS9	1.40464e-05
COX5B	1.40314e-05
CFLAR	1.40313e-05
PPM1G	1.40293e-05
STAT4	1.40291e-05
TGFBR2	1.40289e-05
CEP44	1.40193e-05
CHML	1.40188e-05
SPPL2A	1.40187e-05
KLF11	1.40181e-05
ALDH16A1	1.40174e-05
ENSSSCG00000040801	1.40174e-05
ENSSSCG00000011676	1.40099e-05
TMEM189	1.40086e-05
SMARCD1	1.40076e-05
IFT46	1.39967e-05
C19orf25	1.39862e-05
ENSSSCG00000023331	1.39856e-05
SCAF8	1.39855e-05
MRPL37	1.39832e-05
SH2B3	1.39812e-05
LAMP2	1.3978e-05
TNKS	1.39768e-05
ZNF354C	1.39752e-05
ENSSSCG00000013064	1.39747e-05
RAB1B	1.39661e-05
SLC25A33	1.39647e-05
GPI	1.39553e-05
MRI1	1.39548e-05
DAG1	1.39535e-05
RRP36	1.39535e-05
ENSSSCG00000002697	1.39535e-05
ENSSSCG00000013391	1.39535e-05
ABCB10	1.39535e-05
MRPS23	1.39529e-05
CHRAC1	1.39508e-05
TOB2	1.39495e-05
RSF1	1.39471e-05
ENSSSCG00000038900	1.3946e-05
WDR1	1.39431e-05
ENSSSCG00000033068	1.39381e-05
MED21	1.39345e-05
PBRM1	1.39343e-05
TBCK	1.39324e-05
CDK5	1.39322e-05
SYNGR2	1.39321e-05
TRIM24	1.39308e-05
GZMM	1.39248e-05
ENSSSCG00000038633	1.39224e-05
CPSF7	1.39217e-05
USP22	1.39211e-05
ENSSSCG00000032650	1.39211e-05
PRPS1	1.39166e-05
ENSSSCG00000009338	1.39136e-05
NDUFA1	1.39114e-05
TXNL1	1.39104e-05
TXN2	1.39104e-05
UCHL5	1.39037e-05
LEPROTL1	1.39024e-05
ATP5F1D	1.38988e-05
PCM1	1.38984e-05
SP110	1.38982e-05
SELENOH	1.38941e-05
ENSSSCG00000016758	1.38938e-05
NRBP1	1.38908e-05
CIR1	1.38904e-05
QKI	1.3889e-05
AGPAT3	1.38889e-05
PEF1	1.38889e-05
PDS5B	1.38889e-05
ENSSSCG00000040252	1.38883e-05
ENSSSCG00000017038	1.3884e-05
PAQR8	1.38792e-05
SEMA4A	1.38786e-05
SF3B2	1.38675e-05
SRA1	1.38662e-05
ENSSSCG00000040849	1.38596e-05
AP3D1	1.38582e-05
ALOX5AP	1.3857e-05
FAM13B	1.38568e-05
C16orf91	1.38568e-05
ARFGAP2	1.3854e-05
CTSA	1.38501e-05
PTPRA	1.38494e-05
SUMF1	1.38489e-05
ARHGAP1	1.38468e-05
AKAP8L	1.38346e-05
ENSSSCG00000013232	1.38264e-05
RMC1	1.38255e-05
RBMS2	1.38249e-05
ENSSSCG00000002953	1.38249e-05
MYC	1.38249e-05
NFKBIE	1.38248e-05
IK	1.38239e-05
SCAPER	1.38159e-05
UHMK1	1.3814e-05
RNF181	1.38021e-05
LAT2	1.37974e-05
ASCC1	1.37932e-05
PDCD7	1.37931e-05
PIN4	1.37931e-05
NANP	1.37931e-05
CHD6	1.37925e-05
SQLE	1.37845e-05
PPP1R16B	1.37841e-05
TRMU	1.37836e-05
PISD	1.37829e-05
AEN	1.37821e-05
ABI1	1.37778e-05
CD200	1.3777e-05
SPTSSA	1.3776e-05
CD53	1.37749e-05
MIER1	1.3773e-05
CHCHD6	1.37724e-05
GRAP	1.37722e-05
RPA3	1.37668e-05
RBM38	1.37638e-05
ENSSSCG00000038469	1.37628e-05
RBMX2	1.37619e-05
HIST2H2AC	1.37615e-05
ENSSSCG00000007203	1.37578e-05
SLC9A3R2	1.37524e-05
IFIT2	1.3751e-05
LZTFL1	1.3751e-05
PRELID1	1.37463e-05
EIF2S1	1.37454e-05
CHST7	1.37451e-05
HPF1	1.37436e-05
SCYL3	1.37424e-05
ENSSSCG00000032556	1.37384e-05
HTATSF1	1.37365e-05
ENSSSCG00000040942	1.37363e-05
POLDIP2	1.37305e-05
GPR155	1.373e-05
LRRC8D	1.373e-05
ACP6	1.373e-05
ENSSSCG00000026389	1.373e-05
ADD3	1.37164e-05
STAMBP	1.37153e-05
BRMS1	1.37136e-05
DAXX	1.37136e-05
AATF	1.37136e-05
ENSSSCG00000030300	1.37121e-05
KCTD15	1.37105e-05
TFCP2	1.37101e-05
IRF3	1.37094e-05
TWNK	1.37091e-05
DUSP28	1.36988e-05
CASP7	1.36965e-05
MAGT1	1.36918e-05
TRIM14	1.36892e-05
NDUFS4	1.36867e-05
TMEM268	1.36794e-05
GPANK1	1.3678e-05
PTRH2	1.36779e-05
ENSSSCG00000025107	1.36718e-05
TAPBP	1.36701e-05
SEC22B	1.36674e-05
ZNF793	1.36674e-05
LRRC45	1.36674e-05
KDELR2	1.36612e-05
ENSSSCG00000033697	1.366e-05
NUP85	1.36575e-05
SEC24D	1.36573e-05
RNF115	1.36365e-05
ENSSSCG00000033700	1.36364e-05
ENSSSCG00000005643	1.36335e-05
TMEM18	1.36285e-05
CD74	1.36282e-05
NAA20	1.36247e-05
BLOC1S6	1.36094e-05
CD96	1.36058e-05
RHOF	1.36054e-05
TMC6	1.36054e-05
PRXL2A	1.36046e-05
SLC38A2	1.35982e-05
FAM160B2	1.35956e-05
CDC37L1	1.35952e-05
SARS	1.35913e-05
PYROXD1	1.35748e-05
LMBR1L	1.35747e-05
MIEN1	1.35747e-05
ENSSSCG00000000887	1.35747e-05
CYTH1	1.35704e-05
CDK4	1.35658e-05
GTF2F1	1.35654e-05
RMND5B	1.35586e-05
NSFL1C	1.3555e-05
PHF3	1.35548e-05
LTN1	1.35546e-05
TMEM70	1.35545e-05
UBE2H	1.35492e-05
KDM7A	1.35482e-05
ENSSSCG00000006049	1.35462e-05
FYCO1	1.3544e-05
DUSP11	1.3544e-05
COA6	1.3544e-05
YME1L1	1.35429e-05
TRADD	1.35353e-05
NUP107	1.35341e-05
DHRS3	1.35285e-05
ERCC4	1.35246e-05
NOTCH2	1.35225e-05
ACBD6	1.35135e-05
REEP2	1.35135e-05
PRXL2B	1.35082e-05
KCNC3	1.35041e-05
CHD7	1.35041e-05
CASC3	1.34948e-05
TPST1	1.34844e-05
SGK1	1.34831e-05
NCOA3	1.34758e-05
ENSSSCG00000037869	1.3473e-05
SIPA1	1.34529e-05
NAF1	1.34529e-05
STAG2	1.34529e-05
CEP135	1.34509e-05
ENSSSCG00000009772	1.34429e-05
SRSF6	1.3426e-05
ABTB2	1.34228e-05
HSPB11	1.34228e-05
2021-09-07	1.34188e-05
AGK	1.34169e-05
DHX9	1.34004e-05
ENSSSCG00000033792	1.33929e-05
SPATA5	1.3363e-05
C19orf54	1.3363e-05
MAEA	1.3363e-05
RBM8A	1.33507e-05
ENSSSCG00000002550	1.33327e-05
NCOA7	1.33206e-05
GPS1	1.3318e-05
BABAM2	1.33156e-05
DMAP1	1.33038e-05
KLHDC10	1.33038e-05
POLR2F	1.32986e-05
EIF2B2	1.32955e-05
DCTN5	1.32943e-05
ENSSSCG00000016044	1.32895e-05
STOM	1.32876e-05
GALNT1	1.32693e-05
FOS	1.32508e-05
ENSSSCG00000028633	1.32476e-05
SMAP1	1.3245e-05
BUD31	1.32404e-05
RARS	1.32381e-05
FCER1G	1.31868e-05
DAZAP2	1.31612e-05
C20orf27	1.31199e-05
ELK4	1.31146e-05
CRTAP	1.31004e-05
ADH5	1.30982e-05
ND3	1.30621e-05
CHD3	1.30554e-05
CIAO1	1.30435e-05
ARPC2	1.30187e-05
THY1	1.29748e-05
RSL1D1	1.29607e-05
ABHD17B	1.29534e-05
RAD21	1.29063e-05
RRAGC	1.21353e-05
FLT3LG	1.14963e-05
PRPF4B	1.01073e-05
PAIP2	1.01033e-05
ARL4C	1.00756e-05
MAP3K1	1.00292e-05
ARPC3	9.98773e-06
ENSSSCG00000015664	9.97133e-06
MFF	9.96404e-06
MICOS10	9.95952e-06
ENSSSCG00000028479	9.93349e-06
MYNN	9.92357e-06
CCDC9	9.90222e-06
ZNF34	9.90099e-06
ENSSSCG00000035762	9.88631e-06
HES6	9.88156e-06
UBXN6	9.87938e-06
ESD	9.82005e-06
INTS9	9.80392e-06
OGFOD3	9.80392e-06
FNBP1	9.78265e-06
SSRP1	9.76572e-06
ELOC	9.75966e-06
WTAP	9.7561e-06
KLHDC2	9.7561e-06
TOR1A	9.7561e-06
MYBL1	9.7561e-06
WDR74	9.72706e-06
AFMID	9.72089e-06
ENSSSCG00000013874	9.71192e-06
COQ8A	9.70874e-06
IPO5	9.7071e-06
MCFD2	9.70273e-06
PCMTD1	9.70087e-06
RAB10	9.70005e-06
ENSSSCG00000016990	9.68925e-06
SETD9	9.68523e-06
ENSSSCG00000016597	9.68523e-06
GPD1	9.67727e-06
PDCD6	9.67657e-06
SIN3B	9.66184e-06
SEMA6C	9.66184e-06
BATF	9.64771e-06
MRPS28	9.64057e-06
NAA15	9.63855e-06
COPG2	9.63855e-06
ENSSSCG00000040586	9.61538e-06
PSMD10	9.61538e-06
MAN1C1	9.61413e-06
LRRC28	9.5968e-06
USF2	9.59233e-06
LMAN2	9.5839e-06
TMEM184C	9.58012e-06
THAP5	9.5696e-06
ACSF3	9.56938e-06
FAF1	9.56938e-06
EIF2B4	9.56938e-06
NIPA2	9.56938e-06
LUC7L	9.56938e-06
MGAT1	9.55829e-06
ENSSSCG00000008352	9.55801e-06
ENSSSCG00000004446	9.55147e-06
PHYH	9.54863e-06
CASC4	9.54654e-06
IMPAD1	9.54654e-06
MRPL55	9.53716e-06
HMCES	9.53271e-06
WDR33	9.52818e-06
STXBP3	9.52664e-06
ENSSSCG00000036988	9.52445e-06
GTF2F2	9.52386e-06
ZNF462	9.52381e-06
PDXK	9.52381e-06
UROD	9.52381e-06
GLMN	9.52381e-06
KDM6A	9.52381e-06
ENSSSCG00000039139	9.52381e-06
LRRC8A	9.52095e-06
RABEP1	9.5189e-06
GATM	9.51637e-06
G3BP1	9.51195e-06
ENSSSCG00000006628	9.51134e-06
PRR14	9.50119e-06
A4GALT	9.50119e-06
PBXIP1	9.50119e-06
TBC1D15	9.49827e-06
STAR	9.49143e-06
ABCC5	9.49025e-06
PITHD1	9.48005e-06
RBM26	9.47859e-06
HEMK1	9.4775e-06
SURF1	9.47628e-06
CLCF1	9.46757e-06
RPS26	9.46429e-06
UBE2V1	9.46149e-06
ATP1A1	9.46049e-06
ADAMTS10	9.45911e-06
ARID1B	9.45632e-06
SPTAN1	9.45626e-06
DCBLD2	9.45626e-06
MED19	9.45626e-06
TRAFD1	9.45626e-06
TAF6	9.45626e-06
DLD	9.45574e-06
ENSSSCG00000009633	9.44015e-06
ANKLE2	9.43585e-06
FAM151B	9.43396e-06
PIAS3	9.43396e-06
ZCCHC2	9.43396e-06
RNF125	9.43396e-06
ENSSSCG00000007826	9.43396e-06
USP18	9.43396e-06
ADSS	9.43396e-06
CPNE1	9.43396e-06
TOM1L2	9.43396e-06
AKIP1	9.43337e-06
RUBCNL	9.43258e-06
ERO1A	9.43018e-06
SC5D	9.42445e-06
FAM160B1	9.42443e-06
ENSSSCG00000017749	9.41432e-06
MAP2K5	9.41432e-06
EEFSEC	9.41176e-06
ENSSSCG00000039085	9.41176e-06
SGF29	9.41176e-06
SH3RF3	9.41176e-06
PSMD5	9.41176e-06
ENSSSCG00000039705	9.41163e-06
TRAPPC6B	9.41161e-06
MYO9A	9.41018e-06
TMEM258	9.41002e-06
CASTOR1	9.40686e-06
ENSSSCG00000025060	9.40618e-06
RANBP6	9.40363e-06
NFRKB	9.40176e-06
HAX1	9.40176e-06
DKC1	9.40176e-06
COX8A	9.40157e-06
CCDC85B	9.40134e-06
URI1	9.40082e-06
NAPRT	9.39683e-06
ARRB2	9.39641e-06
WBP1	9.39485e-06
KARS	9.38991e-06
CDKN2AIP	9.38972e-06
CDK19	9.38967e-06
ENSSSCG00000014165	9.38967e-06
CDK18	9.38967e-06
IFFO1	9.38967e-06
MED11	9.38967e-06
CLCN3	9.38967e-06
CNOT9	9.38967e-06
TRIM28	9.38921e-06
TBXA2R	9.38493e-06
CHMP1A	9.38435e-06
PGD	9.37899e-06
LANCL1	9.37868e-06
MED25	9.37422e-06
HCFC1R1	9.37184e-06
IRF1	9.37087e-06
DIAPH2	9.36904e-06
PARP8	9.3685e-06
BLOC1S5	9.36814e-06
COMTD1	9.36789e-06
GALK2	9.36768e-06
SPINT2	9.36768e-06
TTC4	9.36768e-06
DGCR8	9.36768e-06
IRF6	9.36768e-06
OMD	9.36768e-06
FAM104A	9.36768e-06
RPN2	9.36655e-06
UGCG	9.36043e-06
FEM1B	9.35705e-06
NR4A1	9.35674e-06
ENSSSCG00000024486	9.35669e-06
ENSSSCG00000023643	9.35507e-06
DYRK3	9.34993e-06
SPINDOC	9.34906e-06
ING2	9.34906e-06
PSMA6	9.34878e-06
RSRC2	9.34661e-06
FCF1	9.34579e-06
FGFR1OP	9.34579e-06
DNASE2	9.34579e-06
POLD3	9.34579e-06
MTIF2	9.34432e-06
BCL10	9.34284e-06
ENSSSCG00000001927	9.34227e-06
VPS13B	9.34006e-06
AP1B1	9.33948e-06
ETHE1	9.33592e-06
MSMB	9.33521e-06
ENSSSCG00000036229	9.335e-06
CCND2	9.335e-06
EFTUD2	9.3346e-06
ENSSSCG00000017626	9.3295e-06
BPNT1	9.32811e-06
CD99	9.32673e-06
CAMK2G	9.32649e-06
TYMS	9.32552e-06
PAG1	9.32406e-06
HSH2D	9.32406e-06
ACER1	9.32401e-06
CLK1	9.32401e-06
HSD3B7	9.32401e-06
MCRIP2	9.32401e-06
ARL16	9.32401e-06
MSI2	9.32401e-06
MANEA	9.32401e-06
ABHD10	9.32401e-06
TRAF6	9.32401e-06
D2HGDH	9.32401e-06
ENSSSCG00000021236	9.32401e-06
E2F3	9.32401e-06
NAPB	9.32401e-06
ENSSSCG00000013453	9.31951e-06
ZNF507	9.31418e-06
ENSSSCG00000017316	9.31377e-06
HLTF	9.31327e-06
COPB1	9.31274e-06
YIPF5	9.3122e-06
ENSSSCG00000040857	9.30936e-06
RIC1	9.30736e-06
ENSSSCG00000024973	9.30555e-06
RBBP4	9.30519e-06
PLAA	9.30233e-06
SLC25A46	9.30233e-06
EMC9	9.30233e-06
KLHDC4	9.30233e-06
RBM4	9.30233e-06
MYDGF	9.30233e-06
PI4K2B	9.30233e-06
DAGLB	9.30233e-06
CNNM4	9.30233e-06
GALNT10	9.30233e-06
MTIF3	9.30233e-06
PCYT2	9.30233e-06
SLC39A11	9.30233e-06
VPS26C	9.29832e-06
UBASH3A	9.29364e-06
PTPN4	9.29364e-06
ENSSSCG00000038444	9.29364e-06
ANKRD28	9.29304e-06
SIAH1	9.29214e-06
EEF2K	9.292e-06
STX8	9.29163e-06
INTS6	9.29096e-06
PSMB1	9.28928e-06
TPR	9.28882e-06
CAST	9.28665e-06
CFAP97	9.28479e-06
C12orf57	9.28199e-06
PARP12	9.28094e-06
ENSSSCG00000032459	9.28074e-06
TMEM134	9.28074e-06
PGAM5	9.28074e-06
CDK2AP1	9.28074e-06
PDK3	9.28064e-06
TIGD2	9.27777e-06
NAPA	9.27548e-06
MKNK2	9.2706e-06
WDR92	9.2701e-06
XRN2	9.2701e-06
CCDC25	9.27e-06
BNIP3	9.26903e-06
UXS1	9.26146e-06
INPP4B	9.25971e-06
MICOS13	9.25946e-06
EXOC2	9.25926e-06
ZMYM1	9.25926e-06
ENSSSCG00000003667	9.25926e-06
PCBD2	9.25926e-06
NPM2	9.25926e-06
PPID	9.25926e-06
ENSSSCG00000008584	9.25926e-06
ENSSSCG00000017754	9.25926e-06
ENSSSCG00000004349	9.25926e-06
GLCE	9.25926e-06
KLK7	9.25926e-06
ZFAND3	9.25629e-06
SMIM14	9.24857e-06
MEF2A	9.24846e-06
CTSS	9.24771e-06
RIPK1	9.24621e-06
HTRA2	9.24281e-06
EIF3A	9.24277e-06
MTMR12	9.24103e-06
PER3	9.23832e-06
KIF3A	9.23832e-06
TIMM29	9.23807e-06
USP4	9.23788e-06
CIC	9.23788e-06
ZDHHC24	9.23788e-06
SUV39H1	9.23788e-06
SERPINB9	9.23788e-06
CUL4A	9.23788e-06
ENSSSCG00000031659	9.23788e-06
MBIP	9.23788e-06
KANSL1	9.23618e-06
TMEM109	9.23264e-06
ENSSSCG00000005768	9.23225e-06
DUSP7	9.23077e-06
ZC3H7B	9.23075e-06
WDR43	9.22998e-06
HLA.DOB	9.22723e-06
ENSSSCG00000016091	9.22619e-06
UBE4A	9.21835e-06
ENSSSCG00000013836	9.21835e-06
PPP4R3B	9.21737e-06
XPA	9.21737e-06
RBM17	9.21737e-06
CASP8	9.21664e-06
SRBD1	9.21659e-06
SRP68	9.21659e-06
C1orf122	9.21659e-06
TIE1	9.21659e-06
DIABLO	9.21659e-06
IARS	9.21659e-06
POLH	9.21659e-06
MAN2A2	9.21659e-06
USP44	9.21659e-06
SND1	9.21659e-06
IPO8	9.21625e-06
ENSSSCG00000006996	9.21036e-06
RBM42	9.20745e-06
RRBP1	9.20697e-06
MSL3	9.20697e-06
ENSSSCG00000039551	9.20658e-06
ZDHHC17	9.20629e-06
DPH7	9.20609e-06
GLS	9.20509e-06
FAM49A	9.20505e-06
SNAPIN	9.20494e-06
ENSSSCG00000002759	9.20425e-06
UBE2B	9.20107e-06
WAPL	9.19866e-06
LSM7	9.19851e-06
CD109	9.1954e-06
ESRRA	9.1954e-06
NUBP1	9.1954e-06
TTF2	9.1954e-06
BOD1L1	9.1954e-06
ENSSSCG00000038550	9.1954e-06
CRTC2	9.1954e-06
TNK1	9.1954e-06
ENSSSCG00000010158	9.19526e-06
UTP11	9.19413e-06
ENSSSCG00000023158	9.19129e-06
RSAD2	9.19019e-06
CD3D	9.18835e-06
SDF4	9.18816e-06
CHCHD4	9.18757e-06
TOMM40	9.18631e-06
DONSON	9.18544e-06
ANKRD49	9.18515e-06
PHF20L1	9.18495e-06
MOB3A	9.17668e-06
BRAP	9.17605e-06
STK11IP	9.17605e-06
RICTOR	9.17605e-06
MED1	9.17552e-06
BOLA3	9.1745e-06
ATP6V0D1	9.17431e-06
PATL1	9.17431e-06
EAF1	9.17431e-06
GBE1	9.17431e-06
CTNNA1	9.17431e-06
PBLD	9.17431e-06
ACADL	9.17431e-06
B3GNT7	9.17431e-06
TMEM60	9.17431e-06
ZBTB1	9.17431e-06
NHLRC3	9.17431e-06
TMCO3	9.17431e-06
PRKCA	9.17431e-06
ABHD15	9.17431e-06
JAZF1	9.17431e-06
ENSSSCG00000028794	9.17208e-06
ZNF654	9.17132e-06
ENSSSCG00000000207	9.16911e-06
PHGDH	9.16584e-06
TXNDC15	9.16052e-06
SCRN2	9.1572e-06
SUOX	9.15452e-06
CHID1	9.15409e-06
ARHGAP17	9.15409e-06
ATP13A1	9.15332e-06
IL27RA	9.15332e-06
PTPN11	9.15332e-06
RNF10	9.15332e-06
EVA1A	9.15332e-06
PDE7A	9.15332e-06
LMNA	9.15332e-06
ARID3A	9.14631e-06
ENSSSCG00000026354	9.14488e-06
TSPYL2	9.14344e-06
ENSSSCG00000012523	9.14253e-06
TMEM164	9.14182e-06
IKZF5	9.13547e-06
ENSSSCG00000009419	9.13361e-06
NCSTN	9.13318e-06
PLEKHA1	9.13309e-06
GRK6	9.13261e-06
IFT57	9.13242e-06
CELF1	9.13242e-06
ENSSSCG00000037009	9.13242e-06
CLEC11A	9.13242e-06
ENSSSCG00000039639	9.13242e-06
ATP6V1H	9.13242e-06
ENSSSCG00000016949	9.13242e-06
FLII	9.12829e-06
PYGB	9.12758e-06
COX17	9.12724e-06
BAX	9.12401e-06
AKAP7	9.1223e-06
RSU1	9.12211e-06
ESYT2	9.12165e-06
ETF1	9.11812e-06
CGGBP1	9.11711e-06
NUDT18	9.11464e-06
CLK3	9.11393e-06
ITGA1	9.11393e-06
SLC7A6	9.11393e-06
STK39	9.1131e-06
RLF	9.1128e-06
ENSSSCG00000034990	9.11162e-06
FUZ	9.11162e-06
DNAJB2	9.11162e-06
ENSSSCG00000006380	9.11162e-06
LPCAT4	9.11162e-06
OXCT1	9.11162e-06
ENSSSCG00000016970	9.11031e-06
MED4	9.10941e-06
SH3GLB1	9.10926e-06
TNFRSF1A	9.1045e-06
PSMD14	9.10221e-06
PDIA4	9.10183e-06
TFB2M	9.10155e-06
DOCK9	9.09392e-06
GDI2	9.09335e-06
ENSSSCG00000006260	9.09208e-06
TRAM2	9.09133e-06
CDKN3	9.09091e-06
HAUS6	9.09091e-06
RFX1	9.09091e-06
BTAF1	9.09091e-06
COQ10B	9.09091e-06
TXNDC9	9.09091e-06
EXTL3	9.08883e-06
GNPDA2	9.0807e-06
DDX47	9.0807e-06
HSPB6	9.0806e-06
MYH9	9.07945e-06
VPS16	9.07692e-06
KCMF1	9.07328e-06
CAGE1	9.07328e-06
NEPRO	9.07029e-06
ENSSSCG00000024950	9.07029e-06
DBN1	9.07029e-06
ENSSSCG00000016401	9.07029e-06
ENTPD5	9.07029e-06
ENSSSCG00000007688	9.06855e-06
GYG1	9.06617e-06
MRPL41	9.06617e-06
VEGFB	9.06143e-06
CD93	9.06096e-06
RNF7	9.06059e-06
ENSSSCG00000005982	9.06059e-06
RNF13	9.06021e-06
ENSSSCG00000011272	9.0576e-06
NCOA6	9.05204e-06
CEP85	9.05051e-06
NFAT5	9.04977e-06
KDM2A	9.04977e-06
CALCRL	9.04977e-06
UBR5	9.04977e-06
HSPH1	9.04977e-06
EIF6	9.04977e-06
U2SURP	9.03402e-06
ATG4C	9.031e-06
ZNF770	9.0305e-06
TPMT	9.02935e-06
MAD2L1BP	9.02935e-06
RNF111	9.02753e-06
TMEM126A	9.025e-06
HMGXB3	9.02248e-06
TNRC6C	9.02105e-06
HTATIP2	9.0185e-06
ECHDC1	9.00901e-06
CCR2	9.00901e-06
CLP1	9.00901e-06
BCAT1	9.00901e-06
DCTN3	9.0032e-06
CRADD	9.00183e-06
C5orf30	8.9998e-06
SYNCRIP	8.99943e-06
SWAP70	8.99511e-06
TCF25	8.99487e-06
TTL	8.98876e-06
NAT14	8.98876e-06
CUX1	8.98876e-06
BRCC3	8.98876e-06
FARS2	8.98876e-06
ENSSSCG00000033457	8.98876e-06
INKA1	8.98414e-06
LBH	8.97847e-06
PTBP1	8.97641e-06
ENSSSCG00000037597	8.97468e-06
MEA1	8.97082e-06
ZNF251	8.96933e-06
ENSSSCG00000036618	8.96861e-06
QRICH1	8.96861e-06
PQLC3	8.96861e-06
WDR46	8.96861e-06
ENSSSCG00000027085	8.96719e-06
FARSA	8.96684e-06
ARHGAP18	8.96496e-06
ENSSSCG00000009926	8.9545e-06
TSR1	8.95245e-06
FGD3	8.95216e-06
ZNFX1	8.95174e-06
OTUD3	8.94855e-06
ZNF653	8.94855e-06
DTX2	8.94855e-06
NADK2	8.94855e-06
CENPE	8.94347e-06
UQCC2	8.94049e-06
ENSSSCG00000033386	8.92857e-06
RIC8A	8.92449e-06
APBB1IP	8.92264e-06
COLGALT1	8.90869e-06
VPS39	8.90869e-06
USP7	8.90869e-06
MRPS18A	8.90869e-06
COA3	8.90869e-06
AHCYL1	8.90869e-06
GTF2A1	8.90869e-06
EED	8.90118e-06
PRKACB	8.89984e-06
GLIPR1	8.89948e-06
TMTC3	8.88889e-06
PACS2	8.88889e-06
SDCCAG8	8.88744e-06
SLC25A39	8.88602e-06
ENSSSCG00000031655	8.87912e-06
CYBA	8.86918e-06
DPH5	8.86918e-06
RAB4A	8.86298e-06
P2RY10	8.85366e-06
PPM1F	8.84956e-06
CARD19	8.84174e-06
NIN	8.83723e-06
ENSSSCG00000038067	8.83002e-06
TMEM192	8.81057e-06
GUK1	8.8004e-06
TMPO	8.79682e-06
NEIL1	8.79342e-06
GNB1	8.79121e-06
CGAS	8.79121e-06
ACSL4	8.79121e-06
DDX3Y	8.78219e-06
ZFP30	8.78182e-06
TBL3	8.77392e-06
ND4L	8.76501e-06
AP1G2	8.76086e-06
ENSSSCG00000032060	8.75808e-06
ENSSSCG00000030882	8.75274e-06
NCBP2	8.74507e-06
PDPK1	8.74169e-06
DDX60	8.73362e-06
GABARAP	8.71853e-06
RCHY1	8.70663e-06
COX7A2	8.70265e-06
PRCC	8.68965e-06
CTBP1	8.68647e-06
ITGAL	8.63931e-06
LARP1	8.62847e-06
CNOT3	8.58285e-06
ENSSSCG00000015710	8.57334e-06
ENSSSCG00000004583	8.50674e-06
ENSSSCG00000039407	8.47161e-06
PDIA3	8.46785e-06
TP53INP1	8.32642e-06
DYRK1A	8.32446e-06
TIMM13	8.31182e-06
UBP1	8.22511e-06
CIRBP	8.10906e-06
EIF3H	8.02909e-06
ENSSSCG00000011117	7.99777e-06
STRBP	7.98777e-06
CCDC82	6.33385e-06
NPM1	5.95787e-06
CWC15	5.84702e-06
[truncated: 12,388 more rows]

## Sheet: 21v31_Impurity
Supplementary File 14. Random forest pair-wise analyses of CD2 ɣ𝛿 T-cell cluster. For each model represented below the porcine scRNA-seq cluster IDs compared are shown along with the parameters used and resulting OOB prediction error. Variable importance was assigned by measuring node impurity (Impurity) and using permutations (Permutation). Features that reduced error in predictive accuracy are …
Gene	Impurity
CCL5	16.855
SRGN	9.98981
KLRK1	9.20351
ENSSSCG00000032017	9.13542
GNLY	7.36625
NKG7	6.4668
CD2	6.06814
RHEX	6.04642
CD8A	6.01824
GZMM	5.59572
ENSSSCG00000036618	5.47491
LCK	4.79152
FCER1G	4.4911
ENSSSCG00000026217	4.31772
LGALS1	4.09979
GZMB	3.61468
ENSSSCG00000008898	3.51678
ENSSSCG00000024973	3.35433
ADGRG1	3.34802
CAPG	3.24177
CX3CR1	3.13335
IL2RB	2.99118
ANXA1	2.89901
ENSSSCG00000016903	2.73376
ENSSSCG00000000640	2.5804
RDX	2.54232
TBX21	2.54093
ENSSSCG00000012119	2.36283
ENSSSCG00000023584	2.35996
TRAT1	2.27863
GPX1	1.86055
ENSSSCG00000006919	1.83193
S100A4	1.79891
BATF	1.68203
FGR	1.66194
S1PR5	1.66152
ITM2B	1.55292
ENSSSCG00000003042	1.54782
ENSSSCG00000039658	1.51551
ID2	1.36498
DUT	1.3211
SELL	1.28467
PLEK	1.28296
BLK	1.24756
CD244	1.24717
ARPC5L	1.18614
ITGA4	1.18591
HLA.DRA	1.17469
SAMD3	1.16311
TESC	1.11595
FSCN1	1.09048
ENSSSCG00000033734	1.08613
CTSW	1.0346
FAM49A	1.00174
SNX10	0.997457
PPP1CC	0.983894
SAMSN1	0.97345
ZNF683	0.96882
SEMA6D	0.965737
ITM2C	0.958786
RPL34	0.94463
ITGB2	0.943351
ZEB2	0.907698
S100A11	0.906724
ENSSSCG00000029596	0.877977
ENSSSCG00000034868	0.864547
UBAC2	0.862866
PRF1	0.855143
FTL	0.846636
SKAP2	0.832656
EMP3	0.79138
IFI6	0.774305
IKZF2	0.758013
ENSSSCG00000035224	0.751154
PTPN22	0.728207
ENSSSCG00000036114	0.712885
SLA.DQB1	0.712056
PLVAP	0.7029
ENSSSCG00000005095	0.686892
ENSSSCG00000034617	0.684209
YBX3	0.669222
PRR5	0.662259
RPS11	0.647416
GATA3	0.641028
PTPN12	0.640767
XCL1	0.630739
ENSSSCG00000034914	0.619061
ENSSSCG00000037142	0.616013
FLNA	0.607195
DDX5	0.60546
TMEM71	0.594182
ACTG1	0.578555
SH2D1A	0.577682
ENSSSCG00000037187	0.574908
ID3	0.5749
S100A1	0.563651
RPS27	0.55741
B2M	0.555159
TMEM123	0.550319
RUNX3	0.541858
ENSSSCG00000014565	0.52368
CD247	0.522142
ENSSSCG00000000663	0.520373
CD63	0.517931
ENSSSCG00000003691	0.511469
ENSSSCG00000001455	0.510107
ENSSSCG00000027826	0.49548
CD1D	0.490126
NAPSA	0.484142
LTB	0.478183
CST7	0.47535
S100A6	0.473342
SERPINB9	0.470773
EFHD2	0.470495
PTPRC	0.467123
IFITM3	0.459156
TTF2	0.454287
RAC2	0.449461
FUNDC1	0.449351
VIM	0.431302
ITGAL	0.431011
ENSSSCG00000017749	0.424843
ENSSSCG00000014909	0.411626
AOAH	0.383713
ENSSSCG00000001229	0.381531
SIT1	0.3809
STK17B	0.379177
TNFSF10	0.37111
CD74	0.369493
UBB	0.368393
CCL3L1	0.363333
RPL22	0.362582
ENSSSCG00000000635	0.35968
CBLB	0.359511
SLA.DMA	0.35809
EIF3I	0.357942
TMEM134	0.356817
ARPC1B	0.349061
FCER1A	0.342
ENSSSCG00000035520	0.34
ENSSSCG00000036296	0.33739
MIF	0.336572
SUPT4H1	0.335241
ITGAM	0.330453
RPS15	0.328684
RHOQ	0.326337
RCAN3	0.326308
CALHM6	0.324472
H2AFV	0.322702
CYBRD1	0.315385
ENSSSCG00000035768	0.314196
ENSSSCG00000031088	0.313262
RPSA	0.313134
RIN3	0.309966
TIMP1	0.309779
CTSD	0.307593
ENSSSCG00000017032	0.30176
IKZF3	0.296573
ENSSSCG00000003930	0.293997
ENSSSCG00000016737	0.276783
CAMK4	0.276589
SNTB2	0.273363
VAMP5	0.266629
PARK7	0.265427
LSM2	0.265203
LAT2	0.264596
TOX	0.262209
LITAF	0.261401
COTL1	0.260973
ENSSSCG00000001456	0.260349
PIK3CG	0.259884
COX17	0.25862
ENSSSCG00000038507	0.258301
FGL2	0.25794
TMSB10	0.255991
GPR55	0.25421
SH3BGRL3	0.251997
RAP1B	0.251608
PIK3R1	0.249542
ENSSSCG00000013597	0.248433
PPP3CC	0.246803
PLEKHF2	0.245114
RPL37	0.236415
GPR18	0.236205
IL6R	0.235183
ISG20	0.234496
HVCN1	0.232908
WDR1	0.232365
RPS14	0.228358
RPS3A	0.227581
JAKMIP1	0.22272
GPR183	0.222644
TUT4	0.221955
ENSSSCG00000040273	0.221487
ENSSSCG00000025928	0.221229
HMGB2	0.220337
TECR	0.216569
THEMIS2	0.211096
IFNG	0.20951
FAM49B	0.205641
COX6C	0.20267
ENSSSCG00000000576	0.201744
STMN1	0.20164
ENSSSCG00000033721	0.199284
SOD1	0.195391
SLA.DMB	0.19308
UBXN11	0.192494
CD52	0.191418
RPL6	0.189644
TAGAP	0.188061
ENSSSCG00000037364	0.187242
ACTB	0.185594
GBP2	0.185216
IL7R	0.18338
ENSSSCG00000039071	0.182125
PLAC8	0.181202
BIN1	0.178084
RPL23	0.175442
ENSSSCG00000003520	0.175179
PIK3AP1	0.174129
LPAR6	0.170172
VASP	0.169612
RPL11	0.168987
ENSSSCG00000022912	0.168161
ENSSSCG00000021591	0.167
TRDC	0.166628
APBB1IP	0.166101
RPS9	0.165944
EPS15	0.165346
ENSSSCG00000029830	0.165319
ENSSSCG00000027196	0.164992
NDFIP1	0.162454
PCBD2	0.161468
CALM1	0.161247
RPLP2	0.160117
ENSSSCG00000039460	0.159804
TYROBP	0.159069
SF3B6	0.15895
RPL7	0.1587
SMC4	0.156323
TUBB	0.155713
NFKBIB	0.154418
CXCR3	0.15438
CCDC50	0.152392
ABHD15	0.151874
GPR174	0.151758
CD37	0.149533
CD99	0.147838
CD226	0.147052
LSP1	0.146675
ENSSSCG00000035811	0.145642
RPLP0	0.144997
2021-09-01	0.144514
CD96	0.143893
RPS13	0.143725
PCOLCE	0.14272
ARL4C	0.142186
NCALD	0.140248
RPL17.C18orf32	0.140199
PRDX3	0.139417
KLRB1	0.13898
ENSSSCG00000039407	0.138877
RAB4A	0.138808
ENSSSCG00000005481	0.138397
SLC25A24	0.13698
COX1	0.136266
ENSSSCG00000035256	0.135949
ENSSSCG00000014855	0.135504
SPINT2	0.135087
FYB1	0.134847
MAP2K2	0.132709
ENSSSCG00000032003	0.131684
ENSSSCG00000027348	0.131063
PTP4A2	0.130277
ENSSSCG00000014569	0.129886
ENSSSCG00000013064	0.129239
EVL	0.128759
RPS18	0.127788
HINT1	0.127435
KXD1	0.127044
ENSSSCG00000017509	0.126732
IRF2	0.126711
PTMA	0.126664
MRPS25	0.126664
CLINT1	0.126457
KLF2	0.12606
FAM89A	0.123665
ENSSSCG00000013889	0.12358
RPL3	0.122961
YWHAQ	0.122654
EEF1B2	0.12236
VMP1	0.122026
GNA15	0.121545
RPS12	0.121469
SMPD1	0.121394
UCP2	0.121296
TPT1	0.119688
ANAPC16	0.11931
ENSSSCG00000017940	0.118873
ENSSSCG00000033500	0.118376
NDFIP2	0.117903
HSPA8	0.117818
S100A13	0.117395
RPS17	0.117337
EIF4A2	0.117138
PTPRCAP	0.116549
ANXA5	0.115626
ENSSSCG00000004489	0.115394
EVI2B	0.115198
RPIA	0.115178
LMO4	0.114968
PFN1	0.114897
ENSSSCG00000024974	0.114889
LPCAT2	0.114527
PSMA7	0.114495
LAPTM5	0.114375
COX2	0.113556
PRKAR2B	0.113465
ENSSSCG00000020777	0.11298
ENSSSCG00000031897	0.112946
SLC9A3R1	0.112818
GRAP2	0.111542
LAT	0.110883
GRB2	0.110779
RPL39	0.110357
ENSSSCG00000011272	0.11035
EIF3H	0.110161
RPS23	0.10991
ENSSSCG00000007188	0.10977
ENSSSCG00000035080	0.10913
ENSSSCG00000034448	0.109083
WAS	0.109074
CORO1A	0.108482
ENSSSCG00000032918	0.108432
ARF6	0.108335
PLP2	0.108187
RPS16	0.108185
AIMP1	0.107754
TXNIP	0.107008
TMEM189	0.106214
RPS6	0.106213
PSMB4	0.10581
DAPK2	0.105289
ENSSSCG00000038711	0.105241
ENSSSCG00000004970	0.104875
RPS26	0.104541
ND4	0.104354
DPP4	0.103734
ENSSSCG00000014540	0.103461
COX3	0.10253
HSD11B1L	0.102529
VPS25	0.102328
PPP1R18	0.102101
EZR	0.101911
TSC22D3	0.101751
NFIL3	0.101694
HSP90AA1	0.101335
FASLG	0.100811
ENSSSCG00000013661	0.0997022
NTAN1	0.0996416
CDC42EP3	0.0996111
ATP5F1E	0.0991831
OAZ1	0.09909
ENSSSCG00000020830	0.0989016
RPS10.NUDT3	0.0988523
ENSSSCG00000008170	0.0985729
ATP6	0.0982993
KRCC1	0.0981501
HYPK	0.0981463
RPL36AL	0.0977783
ENSSSCG00000039582	0.0974958
KLHL8	0.0974227
ENSSSCG00000018063	0.0969615
ENSSSCG00000015447	0.0966743
RGS1	0.0965578
LEF1	0.0963427
ENSSSCG00000006395	0.09623
COX7A2L	0.0959321
TUBA1B	0.0957142
H3F3A	0.0955452
EMC6	0.0953107
RPL9	0.0952604
GLIPR1	0.0947679
ENSSSCG00000039740	0.0943669
RPS21	0.0936861
ST6GALNAC4	0.0934269
SEC11A	0.0930769
SERTAD1	0.0930685
ENSSSCG00000001063	0.0929813
PNRC1	0.0925666
ENSSSCG00000010320	0.0922111
ENSSSCG00000037602	0.091355
EIF2S2	0.0912713
RPL5	0.0911165
EIF1	0.0907844
CRIPT	0.0901818
HSPE1	0.0900479
ENSSSCG00000013878	0.0895307
ATP5MD	0.0895201
ENSSSCG00000004145	0.0893879
ITGB7	0.0893821
PABPC1	0.0893503
SSR4	0.089212
LRMP	0.0888394
CD53	0.0886398
LCP1	0.0885782
COX8A	0.0881209
SNRPA1	0.0878388
CPPED1	0.0876842
TPM3	0.0876726
ENSSSCG00000027573	0.0876283
ENSSSCG00000015710	0.0871608
RAP1A	0.0870966
CD5	0.0867629
GABARAP	0.0866868
ENSSSCG00000003903	0.0861779
BTF3	0.0857225
CAPZA1	0.0856364
RASAL3	0.0855382
HMOX2	0.085135
RESF1	0.0848733
MYL6	0.0838844
SIGIRR	0.0838835
ENSSSCG00000031912	0.0837502
TES	0.0832699
POLR1D	0.0831783
SPCS1	0.0831757
SERPINB1	0.0829216
NME2	0.0827257
PSMB2	0.0825484
ENSSSCG00000036716	0.0825221
TLE5	0.0825152
TAX1BP1	0.0824425
PSIP1	0.0822902
H3F3B	0.0820418
ARL6IP5	0.0818448
ENSSSCG00000039544	0.0816203
ENSSSCG00000035162	0.0815135
CFDP1	0.0815121
COX5B	0.0813991
TNFAIP8	0.0810741
CRADD	0.0809902
CYTB	0.0808231
TMBIM6	0.0808068
ARPC3	0.0805583
CDC123	0.079957
ENSSSCG00000036350	0.0796443
ZAP70	0.07956
DBI	0.0793922
ENSSSCG00000037595	0.0792875
EMB	0.0789081
GPR37	0.0786834
EEF2	0.0786328
KIF5B	0.0783725
SEC62	0.0781802
BCAS4	0.0780014
CARHSP1	0.0779451
2021-09-07	0.0777343
SAE1	0.0774608
ENSSSCG00000016735	0.0774446
ENSSSCG00000000071	0.0774013
PSMA6	0.077271
RPS4X	0.077113
ND2	0.0770269
ENSSSCG00000033697	0.0767468
SH3GLB1	0.0767365
COX7A2	0.0765326
DBNL	0.0765
TRAF3IP3	0.0764028
ZNF618	0.076266
DNAJA1	0.0758721
CCSAP	0.0758668
ENSSSCG00000009327	0.0754423
ENSSSCG00000040248	0.074999
MRPL41	0.0744588
ENSSSCG00000022176	0.0742714
PSMB8	0.0739143
HCST	0.0736498
STRBP	0.0729801
LENG8	0.0725688
ENSSSCG00000033909	0.0725235
ENSSSCG00000035728	0.0724818
RTRAF	0.0723945
ENSSSCG00000009303	0.0723325
TXK	0.0721138
SMCHD1	0.0719471
ENSSSCG00000004963	0.0716777
PLCL2	0.071508
CST3	0.0713669
S1PR1	0.0711901
GABARAPL2	0.0711901
DPM2	0.0709379
ND1	0.0707438
DUSP1	0.070475
RPS6KA1	0.0704553
MAP1LC3B	0.070432
NUDT21	0.0703899
ENSSSCG00000032166	0.0703659
ILF2	0.0703157
OSTF1	0.0699314
GAPDH	0.0692868
CFL1	0.0692598
CTSC	0.0689218
EIF3K	0.0686445
MCL1	0.0683268
ENSSSCG00000039139	0.0679773
ENSSSCG00000009772	0.0678028
ENSSSCG00000014969	0.0677376
ATP6V1E1	0.0677299
CYTIP	0.0677047
GPX4	0.06747
ENSSSCG00000022246	0.0673062
RPL10A	0.0672144
ARPC2	0.0671289
UBE2V1	0.0670883
CAPZA2	0.0670174
ENSSSCG00000033019	0.066939
PPP1CB	0.0669258
JAK1	0.0667899
CAB39L	0.0667183
EIF3E	0.0666442
ARHGEF3	0.0665494
ENSSSCG00000001341	0.0665116
ATP6AP1	0.0664157
GORASP2	0.0662785
RORA	0.0662674
ENSSSCG00000017928	0.0660602
COX4I1	0.0660146
ENSSSCG00000037775	0.06579
EWSR1	0.0657749
ATP5IF1	0.0657575
PSMB6	0.065633
UBE2D3	0.0655906
ENSSSCG00000023323	0.0655246
WDR45	0.0653452
ZFP36L2	0.065192
TRAM1	0.0651886
HACD4	0.0650791
RABAC1	0.0650491
SNRK	0.0643462
YTHDF2	0.0643052
ENSSSCG00000035869	0.0642142
ZFP36L1	0.0641401
TCF7	0.0638513
ENSSSCG00000033744	0.0636711
GMFG	0.0636369
ENSSSCG00000016758	0.0635403
S100A10	0.0634994
CINP	0.0633681
UNC119	0.0632678
HSPA4	0.0631926
SLC25A6	0.0631188
STXBP2	0.062986
HNRNPDL	0.0627636
U2SURP	0.0626209
ZNRF1	0.0625847
SNRNP40	0.0625592
BZW1	0.0624667
ENSSSCG00000007088	0.062429
PNISR	0.0622635
VPS28	0.0622226
CIRBP	0.0621449
ENSSSCG00000031152	0.0621017
CD44	0.0620613
FUT7	0.0618977
EIF4A1	0.0618704
ENSSSCG00000007978	0.0617953
PSAP	0.0617615
RGS19	0.0617487
HNRNPK	0.0616277
VAMP8	0.061385
PYCARD	0.0612682
BCCIP	0.0611922
SMARCA4	0.0610734
CASC1	0.060964
ENSSSCG00000006830	0.0607406
IL10RA	0.0605702
ENSSSCG00000027675	0.060536
ENSSSCG00000017239	0.060506
ENSSSCG00000008433	0.060454
ENSSSCG00000013992	0.0604149
CD3G	0.0603802
PSMB9	0.0602631
ENSSSCG00000037030	0.0600947
SPTAN1	0.0600456
HBB	0.0600438
JAML	0.0600359
FLT3LG	0.059913
BIN2	0.0598336
HMCES	0.0598014
RSU1	0.0597529
ARID4B	0.0597098
RPL26	0.0596527
LYAR	0.0596055
WDR18	0.0595765
SIPA1	0.0595114
MSN	0.0592546
ENSSSCG00000037143	0.059243
SAMHD1	0.0592392
CCNG1	0.059167
NEDD8	0.0590402
NOL7	0.0590203
SLC1A5	0.0589553
NDUFB4	0.0589497
SRSF10	0.0588318
SRSF2	0.0587547
MAF	0.0587035
ENSSSCG00000017038	0.0586959
SKAP1	0.0585319
GPAA1	0.0584786
MORF4L1	0.0584496
ENSSSCG00000024263	0.058423
COX7B	0.0584166
ENSSSCG00000023158	0.058273
MRRF	0.0582476
NDUFB7	0.0580251
TMEM43	0.0577803
NUMBL	0.0577789
DPM1	0.0577524
PRMT2	0.0576912
NDUFS3	0.0576793
BUB3	0.0576746
ENSSSCG00000040857	0.0573705
CHPF2	0.0573206
CCR9	0.057275
ATP5MC2	0.0572278
STRN	0.0571268
OSBPL8	0.0570338
TOX4	0.0566182
ANKRD54	0.0566155
ARHGAP27	0.0565318
ENSSSCG00000039062	0.056405
F2R	0.0562421
ENSSSCG00000039706	0.0560397
COX5A	0.0560368
HSPB1	0.0558735
ENSSSCG00000039046	0.0558335
ABLIM1	0.0557533
ENSSSCG00000038444	0.0557211
ENSSSCG00000031773	0.0557146
TGFB1	0.05568
SERPINF1	0.0556361
ENSSSCG00000010203	0.0555163
HNRNPR	0.0552959
ENSSSCG00000038825	0.0552329
ENSSSCG00000010517	0.0551727
ENSSSCG00000034709	0.0550214
SSR2	0.0550055
BHLHE40	0.0549214
ENSSSCG00000028485	0.0547762
TMEM50A	0.0547524
UQCRQ	0.0546394
STX11	0.0544455
CGA	0.0544316
CD81	0.0543778
ESD	0.0543402
BRK1	0.0542816
CHRAC1	0.0542562
GYG1	0.0542138
MRPS2	0.0541895
LRRC42	0.0540444
RBM42	0.0540191
ATP13A2	0.0538847
NAGA	0.0538427
CFLAR	0.0538318
RBM12	0.0538215
ATP5MC1	0.0537897
LAMTOR1	0.0537141
C14orf119	0.0536638
RFC2	0.0535134
SRRM2	0.0535093
ENSSSCG00000033733	0.0534683
PRELID1	0.053296
ENSSSCG00000013052	0.0532857
RHEB	0.053268
AGO2	0.053228
GSN	0.0530101
PIGT	0.0530044
SFT2D1	0.052944
ZNF330	0.0528677
CIR1	0.0528566
OSBPL3	0.0528358
CYCS	0.0528178
MRPL20	0.0528016
ATXN7L3B	0.0527414
FOXN3	0.0527072
DCAF8	0.0526996
ENSSSCG00000032556	0.0526974
C15orf48	0.0525931
BBX	0.0524469
SLC25A5	0.052422
ATP5PO	0.0524183
ANAPC13	0.0524055
PKM	0.052367
PQLC3	0.0522991
COX6A1	0.0522033
CAST	0.0522008
CTSZ	0.0519912
ANXA2	0.0519856
ATP6V0C	0.0518441
GNAI2	0.0517714
PPP2R5E	0.0517362
SH3BGRL	0.0516402
PTPN18	0.0516393
CRTAM	0.0515669
RPL27	0.0514028
ATP6V1G1	0.0513743
C12orf75	0.0513741
ELOC	0.0513577
ENSSSCG00000003914	0.0511819
NCR1	0.0510555
SAT1	0.0509945
ENSSSCG00000006081	0.0509549
PNPLA6	0.0508772
ENSSSCG00000031117	0.0507587
RASGRP1	0.0507232
CACYBP	0.0507025
REX1BD	0.0505996
RPL7A	0.0505949
C12orf10	0.0505623
LMAN2	0.050483
ENSSSCG00000011952	0.050415
TXNDC17	0.0503918
CA11	0.0503367
SMC6	0.050251
CCT5	0.0501542
ENSSSCG00000016990	0.0500917
RPS5	0.0500265
RPL10	0.050005
ACTR2	0.0499895
GZMK	0.0499651
TCERG1	0.0499252
POLE4	0.0498743
COMMD4	0.0498581
ISCU	0.0498347
GNPAT	0.049821
ENSSSCG00000000905	0.0497972
IRF1	0.0497536
DUSP6	0.0496972
RAP2B	0.0495777
CCR5	0.0494529
TMEM38B	0.049424
NCK1	0.0492797
RNASEH2B	0.0492506
RAB11FIP2	0.0492028
PTPN1	0.0491704
ENSSSCG00000005656	0.0491581
NCL	0.0489271
ACP5	0.0487261
ENSSSCG00000039581	0.0487208
SERBP1	0.0486861
SPG21	0.0485797
ENSSSCG00000000405	0.0485446
PITHD1	0.048529
AKAP8L	0.0484803
ENSSSCG00000003253	0.0484339
SAMD9	0.0484295
WFDC2	0.0484224
ARHGDIB	0.0483249
FCMR	0.0482783
ENSSSCG00000000657	0.048261
HPF1	0.0482182
THEMIS	0.0482088
LFNG	0.0480037
SREBF2	0.0479404
SF3B1	0.0479297
ENSSSCG00000007743	0.0479045
ENSSSCG00000037885	0.0478939
ENSSSCG00000012916	0.0478823
ENSSSCG00000000097	0.0478482
LRCH1	0.0477864
CTNNB1	0.0477737
GNB2	0.047739
CAP1	0.0476246
CD38	0.0476233
AGFG2	0.0476063
ENSSSCG00000007031	0.0475186
PDCD10	0.0474879
ASNA1	0.0474257
MIEN1	0.0473744
FMNL1	0.0473544
NAP1L1	0.0472851
YPEL5	0.0472444
RNASEH2C	0.0472206
DMD	0.0471896
CDK4	0.0471778
TBCA	0.0471124
TBC1D20	0.0471098
RTF1	0.0470816
LIMD2	0.047018
ENSSSCG00000015664	0.046971
ENSSSCG00000001396	0.0468835
ACP1	0.046841
NEDD1	0.0468214
ND3	0.0467463
DHRS7	0.0466574
NKAPD1	0.0466475
SRRM1	0.0466455
EIF3L	0.0466127
COX7C	0.0465423
HDAC2	0.0464936
MGAT4A	0.0464264
ENSSSCG00000026449	0.0463267
ENSSSCG00000013720	0.0463237
DYNLT3	0.0462949
EIF6	0.0462105
ATP5ME	0.0462039
RPL35	0.0460728
FAR2	0.0459858
CREB3L1	0.0459719
PDCD4	0.0459276
U2AF2	0.0457571
ARRB2	0.0456705
HSH2D	0.0456488
RAB1B	0.0456389
GPSM3	0.0456085
PHF3	0.0456
KDSR	0.0455693
ENSSSCG00000017213	0.0454732
ENSSSCG00000034314	0.0454528
ENSSSCG00000029857	0.0454374
TPD52L2	0.0453838
PDLIM7	0.045381
AP1M1	0.0453284
ETS1	0.0453179
MFNG	0.0451849
IFI44L	0.0451609
HNRNPH3	0.0450631
SRI	0.0450592
ENSSSCG00000023331	0.0450586
TM2D1	0.0450288
KDM5A	0.0449884
ENSSSCG00000033786	0.0449653
MAPK6	0.0449241
IL10RB	0.0449002
C1orf21	0.0448854
SEC11C	0.044875
ATP5PB	0.0448257
ENSSSCG00000020686	0.0446692
CUTA	0.0446444
ENSSSCG00000036229	0.0446011
WSB1	0.0445545
MBNL1	0.0445152
AGO3	0.0444481
ENSSSCG00000002907	0.0443756
IPO11	0.0443641
EMC10	0.0443269
SRSF5	0.0443109
ENSSSCG00000001779	0.0442556
FCF1	0.0441951
ENSSSCG00000002505	0.0441865
PUF60	0.0441585
ENSSSCG00000002898	0.0441436
NUF2	0.0440848
SEC61G	0.0440716
C6orf62	0.044049
EMD	0.0440452
ENSSSCG00000036491	0.0438692
PARP12	0.0438461
SIVA1	0.0436592
ENSSSCG00000038963	0.0435776
ENSSSCG00000037979	0.0435355
TVP23C	0.0435263
KLHDC3	0.0435182
HNRNPM	0.0434897
LAP3	0.0434831
SP110	0.0433003
SUCLG1	0.0432963
ARHGAP30	0.0432886
PFKP	0.0432342
CCAR1	0.0432256
MAX	0.0431742
PIGC	0.0431404
EMG1	0.0431274
PLEKHB2	0.0430461
IFIT1	0.0430407
PSMB1	0.0430231
NDUFC2	0.0430118
TMEM107	0.0429311
ITGB1	0.0429301
RIN2	0.042919
TRAPPC2L	0.0428858
ENSSSCG00000010674	0.0428464
P3H1	0.0428364
UBE2J1	0.0426865
PPP2CA	0.0426836
UROD	0.0426639
STK10	0.0426243
ENSSSCG00000027491	0.0425866
ENSSSCG00000008061	0.0425627
ENSSSCG00000038989	0.0425072
WDR91	0.0424772
PLXND1	0.0424621
OTULINL	0.042431
ENSSSCG00000016475	0.0424098
FLI1	0.0422793
ENSSSCG00000017555	0.0422693
PRPS1	0.0421981
CYBA	0.0421897
ENSSSCG00000013232	0.0421066
TOR4A	0.0421037
NDUFB9	0.0420131
PIP4K2A	0.0419991
ENSSSCG00000012961	0.0419033
ENSSSCG00000014267	0.0418762
ENSSSCG00000001696	0.0418239
LMAN2L	0.0418179
ENSSSCG00000016212	0.0418125
ZNF655	0.0417476
CYTH4	0.0417169
CPM	0.0416802
CCR7	0.0416727
BTF3L4	0.0416673
ENSSSCG00000031705	0.041556
ENSSSCG00000013315	0.0415309
BUD23	0.041487
MPG	0.041481
ENSSSCG00000013366	0.0414481
LY9	0.0414302
CHIC2	0.041397
OCIAD1	0.0413606
ETFA	0.0413557
STK4	0.0413129
ILK	0.0412889
FERMT3	0.0412622
CNBP	0.0412322
ACTR6	0.0412198
ENSSSCG00000038633	0.0412147
THRAP3	0.0411781
TWF2	0.0411456
ENSSSCG00000037399	0.0411202
ERBIN	0.041056
PSMD14	0.0410354
ENSSSCG00000004414	0.0410199
ENSSSCG00000009673	0.0409505
NDUFAF3	0.0409407
MOBKL3	0.0408849
NFYB	0.0408444
ENSSSCG00000032501	0.0408281
KARS	0.0408202
ENSSSCG00000001398	0.0407585
CAPZB	0.0406918
DDX23	0.0406114
ARGLU1	0.0405918
GNG2	0.0405852
KRTCAP2	0.0405845
ENSSSCG00000035048	0.0405825
TSC22D4	0.0405818
ATP5PF	0.0405793
ATP6AP2	0.040522
ENSSSCG00000020790	0.040492
RANBP1	0.0404719
SND1	0.0404372
NSMCE4A	0.0403716
TAPBP	0.0403526
ENSSSCG00000006260	0.0403458
ENSSSCG00000018061	0.0402875
PNRC2	0.0402489
ENSSSCG00000011676	0.040186
ASRGL1	0.0401504
CDK5	0.04014
UBE2V2	0.0401154
C14orf28	0.0401033
ENSSSCG00000034190	0.0400988
TRAPPC5	0.0400968
PHYH	0.0400897
ENSSSCG00000027085	0.0400556
YIPF5	0.040045
TPI1	0.0400053
SARNP	0.0400008
SSR3	0.0399401
2021-03-02	0.0399216
SERP1	0.0398866
BATF3	0.0398682
ENSSSCG00000031172	0.0398425
ATP6V1D	0.0398271
ENSSSCG00000007688	0.0398031
CENPW	0.0397958
SUN2	0.0397385
ENSSSCG00000013721	0.0396797
MLF2	0.0396081
CCSER2	0.0395929
ARPC5	0.0395485
NDUFB10	0.039501
EIF4G2	0.039491
ENSSSCG00000011329	0.039458
ENSSSCG00000033700	0.0394399
C9orf78	0.0394175
FGD4	0.0393039
G6PD	0.0392526
ARID3A	0.0392341
CNPY3	0.0391975
SLK	0.03917
C5orf24	0.0391674
ARPC4	0.0390674
ENSSSCG00000016451	0.0390517
ASXL1	0.0390386
SPTBN1	0.0389747
NBEAL2	0.0389697
ENSSSCG00000014850	0.0389136
CNN2	0.0388746
HSD17B12	0.0388695
DDX46	0.0388231
CLDND1	0.0387563
ENSSSCG00000000377	0.0386966
SSRP1	0.0386288
ENSSSCG00000023792	0.0385907
CSNK1G3	0.0385678
ENSSSCG00000030295	0.0385563
ENSSSCG00000015337	0.0385554
SEMA4D	0.0385192
GSPT2	0.0384779
CGAS	0.038463
IGF2R	0.0384219
SRSF6	0.0383925
VTA1	0.038333
ENSSSCG00000016711	0.0383203
ABI1	0.0382467
MAPRE2	0.0382263
C5orf15	0.0382035
MIIP	0.0381998
ADI1	0.0381603
CRLF3	0.0380958
SYAP1	0.0380751
STAT3	0.038037
PDE4D	0.0380351
SEC61B	0.0379828
ARHGEF6	0.0379745
CCT8	0.0379472
ND4L	0.0379325
ENSSSCG00000002472	0.0379147
SYNGR2	0.0378984
RAD21	0.0378785
ENSSSCG00000009145	0.0378594
CEP192	0.0378243
SDHAF2	0.0378056
CMAH	0.0377734
ENSSSCG00000007609	0.0377606
MYO1F	0.0377444
SRPK1	0.0377376
POMP	0.0376934
TMEM192	0.0375977
SSBP4	0.0375845
MBOAT1	0.037537
PAFAH1B3	0.037523
BPTF	0.0374924
SPOCK2	0.0374513
ENSSSCG00000009926	0.0373881
GLRX3	0.0373408
SEMA4A	0.0373232
ENSSSCG00000036096	0.0373089
ENSSSCG00000034527	0.0373072
ENSSSCG00000011290	0.0372884
H2AFY	0.0372562
SSH1	0.0372174
C11orf58	0.0372151
FBXO25	0.0372125
BTG1	0.0372064
CAPRIN1	0.037191
ATP5MC3	0.0371601
MED7	0.0371377
POLDIP2	0.0370632
CDK2AP2	0.037045
ENSSSCG00000015040	0.0370065
CXCR4	0.0369954
PPP1R12A	0.0369744
MOB3A	0.0369356
BRI3BP	0.0369207
LAMP2	0.0369095
CCDC69	0.0369082
EIF4B	0.036904
DHRS3	0.0369018
PIN1	0.0368277
COPZ1	0.0368133
RBMS1	0.0367278
URB2	0.0367225
SF3B5	0.0366738
SELENOS	0.0366641
BROX	0.0366598
SCAND1	0.0366512
RIOK3	0.0366412
ENSSSCG00000010685	0.0366404
EEF1D	0.0366049
2021-09-11	0.0365622
RASSF4	0.0365569
HPCAL1	0.0365541
LYST	0.0365532
ADORA2A	0.0365051
ENSSSCG00000010855	0.0364954
MAT2A	0.0364885
CD9	0.0364519
KCNAB3	0.0364339
UXT	0.0364115
TMEM104	0.0363885
RNPS1	0.0363637
SDHB	0.0363153
MICOS13	0.0362479
SNRPE	0.0362389
REPIN1	0.0362155
SUMO2	0.0362072
SSB	0.0361803
ADGRE5	0.0361641
BRD2	0.0361458
STRADB	0.0361244
TAP1	0.0361008
ENSSSCG00000033572	0.0360728
MRPL57	0.0360585
ACBD6	0.0360556
EIF1AX	0.0360405
ENSSSCG00000036658	0.0359881
YBEY	0.0359064
YPEL3	0.0359019
VSIR	0.0358761
NUDT22	0.0358489
ENSSSCG00000040294	0.0358311
ENSSSCG00000003211	0.0358217
RTN4	0.0357869
DCK	0.0357787
LIAS	0.0357563
TIMM8B	0.0357283
ENSSSCG00000001097	0.0356069
ENSSSCG00000007203	0.0355978
IVNS1ABP	0.0355939
RCSD1	0.0355883
PSMC4	0.0355323
ENSSSCG00000037081	0.0355101
EGLN3	0.0355008
GLCCI1	0.0354667
TNFAIP3	0.0354216
ZRANB2	0.0354156
ITSN2	0.0354084
IFIT5	0.0353955
SAR1A	0.0353756
SMDT1	0.0353689
COPS2	0.0353435
SYF2	0.0352255
TSHZ1	0.0352034
SEC13	0.0351986
MEAF6	0.0351762
SLC25A53	0.0351572
TLN1	0.0351388
BIRC3	0.035087
TPR	0.0350776
RNF5	0.0350618
ENSSSCG00000007749	0.035031
MRPL24	0.0350291
RAB5A	0.0350215
FDX1	0.0350171
ENSSSCG00000004307	0.0350023
PIAS2	0.0349862
ENSSSCG00000005453	0.0349824
HEATR3	0.0349719
MDH2	0.0349574
CNOT4	0.0349291
SYTL3	0.0348281
COL23A1	0.0347285
VRK2	0.0346141
RRP15	0.0345659
ENSSSCG00000014343	0.0345396
C7orf50	0.0345332
ENSSSCG00000021560	0.0345253
NIFK	0.0345111
ENSSSCG00000026064	0.0344775
CSTB	0.034419
DTX3	0.0343733
ENSSSCG00000023595	0.0343487
TAF7	0.0343075
SUMO1	0.0343048
BAZ1A	0.0342906
LY96	0.0342509
CMPK2	0.034215
TSPO	0.0341652
EFR3A	0.0341592
CAMK1	0.0341459
TBX6	0.0341384
PPP2R1B	0.0341109
USO1	0.034105
ENSSSCG00000012731	0.0340998
SKIL	0.0340687
STMN3	0.034037
ENSSSCG00000036988	0.0340164
BNIP2	0.0340026
HERPUD2	0.0339537
GOLGB1	0.0339536
DHCR7	0.033944
ENSSSCG00000004392	0.0339248
PELP1	0.0339116
STXBP3	0.033895
SF3B2	0.0338853
RBL2	0.0338703
EIF4H	0.0337618
KTN1	0.0337425
LCP2	0.0337309
SQSTM1	0.0337203
UNC45B	0.033708
ENSSSCG00000033653	0.0336897
RASAL2	0.0336721
SUSD3	0.0336532
LYPLA2	0.0336421
CNPY2	0.0336395
MAP3K1	0.0336374
FAM210B	0.0336203
ENSSSCG00000034896	0.0336141
SYMPK	0.033574
LRCH4	0.0335459
ASXL2	0.0335232
CARD6	0.0335168
MTSS1	0.033512
PIK3CD	0.0334771
ENSSSCG00000037971	0.0334729
EXOC6B	0.0334662
CHMP5	0.0334317
ENSSSCG00000005768	0.0334043
DECR2	0.0333973
BCL10	0.0333596
TRMT112	0.0332889
NUCKS1	0.0332157
OGA	0.0332121
ENSSSCG00000000636	0.033201
CTSH	0.0331762
DDX39B	0.0331688
ENSSSCG00000024776	0.0331659
FIBP	0.0331611
TMEM126B	0.0331451
SLC25A36	0.0331271
ENSSSCG00000026488	0.0330171
MISP3	0.0330107
IRF3	0.0329797
ENO1	0.0329501
LTA4H	0.0329458
SLC7A5	0.032928
PSMB7	0.0328907
TMEM109	0.032789
BAZ1B	0.0327884
MTCH1	0.0327818
UBA1	0.0327806
ENSSSCG00000040529	0.0327751
PIK3C3	0.0327655
ENSSSCG00000003348	0.0327509
MID1IP1	0.0327425
FBXW7	0.0327347
ELF4	0.0327343
HSP90AB1	0.0327094
PAXX	0.0326481
ENSSSCG00000012397	0.0326263
THOC2	0.0326187
DIS3L2	0.0326051
RCL1	0.032557
NUDT16	0.0325434
ENSSSCG00000035507	0.032531
NMT1	0.0325225
P2RY11	0.0325217
PLEKHF1	0.0325212
CALR	0.0324963
ENSSSCG00000002996	0.0324692
FH	0.0324662
GPR171	0.0324265
PSTPIP2	0.0324154
ORC2	0.0324026
HP1BP3	0.0322095
PYROXD1	0.0321883
HMGA1	0.0321831
PAK2	0.0321663
ENSSSCG00000027746	0.0321198
HNRNPU	0.0320982
TOB2	0.0320582
RAB5C	0.0320314
DDX6	0.031973
ARHGAP26	0.0319409
IL12RB2	0.0318918
TRIM27	0.0318847
LY6D	0.0318792
CHMP4B	0.0318502
TAOK3	0.0318465
CRK	0.0318399
CCRL2	0.0318098
RPS20	0.0317616
UBXN1	0.0317566
SNU13	0.0317124
MRPL44	0.0317041
ISG15	0.0317011
ENSSSCG00000001414	0.0316891
SPNS3	0.0316826
JPT2	0.0316418
EMC3	0.0316254
ARHGAP15	0.0316158
IK	0.0315911
ENSSSCG00000014371	0.031587
HSPA5	0.0315632
CEP170	0.0315148
CSK	0.0314974
GNAI3	0.0314594
SFPQ	0.0314554
RALY	0.0314512
ELOVL5	0.0314398
PPM1A	0.0314339
RELA	0.0314278
TCP11L2	0.0314253
EDF1	0.0314098
HDGFL3	0.0313847
CUEDC2	0.0313778
KMT5B	0.0313661
SNX2	0.0313449
TMEM59	0.0312928
ATG3	0.0312657
RILPL2	0.0312271
MYO5A	0.0312053
TUFM	0.0311971
IDH2	0.0311764
PRPF38A	0.0311493
DYNC1H1	0.0311063
CRTC3	0.0311013
GNB1	0.03106
ENSSSCG00000010795	0.0310245
SSBP3	0.0309984
PSMC5	0.0309862
CD3D	0.0309761
ENSSSCG00000012885	0.0309659
SGTA	0.0309633
SARAF	0.0309501
DAPL1	0.0309278
PLAGL1	0.0308969
DDX20	0.0308877
PRKCB	0.030875
UQCC2	0.0308714
LAMTOR5	0.0308674
ENSSSCG00000007253	0.0308655
ENSSSCG00000036595	0.0308438
FPGS	0.0308363
PIAS1	0.0308237
ACSF2	0.030768
PHF14	0.0307398
TMED10	0.0307367
CTSA	0.030727
LBR	0.0307144
NFKB1	0.0306792
PTGER2	0.0306792
RHOA	0.030619
DCAF7	0.0306172
SPTLC2	0.0306054
TIAM1	0.030596
ENSSSCG00000012403	0.0305699
ENSSSCG00000017670	0.0305208
USP25	0.0305075
TXNL4A	0.030501
ENSSSCG00000035561	0.0304422
MAD2L2	0.0303735
STAG2	0.0303182
ENSSSCG00000027790	0.0302993
CHCHD3	0.0302675
LNPEP	0.0302657
KIF21B	0.0302606
ENSSSCG00000005358	0.0302504
PABPN1	0.0302263
OSBPL2	0.0301954
HLTF	0.0301903
ZNF207	0.030171
ILKAP	0.0301103
NUDC	0.0300958
KMT2E	0.030088
TTYH1	0.0300317
TXNDC5	0.0300158
RHOG	0.0300155
GLUD1	0.0300153
CMBL	0.029995
C21orf91	0.0299741
LDLRAD4	0.0299494
BET1	0.0299279
ADSS	0.0299178
DAD1	0.029903
MPZL3	0.0298701
PRDX4	0.0298688
PARP2	0.0298277
PTBP1	0.0298234
HNRNPH1	0.0298202
ZNF277	0.0298197
ILRUN	0.0298173
RASA1	0.029794
DTWD1	0.0297814
MORC3	0.029771
SERINC1	0.0297698
RACK1	0.0297608
SNRPN	0.0297418
PI4K2B	0.029735
FUT8	0.0296753
EMC7	0.0296144
NDUFS5	0.0295931
ENSSSCG00000002790	0.0295904
SASH3	0.0295843
ENSSSCG00000012166	0.029567
MRPS15	0.0295601
CHP1	0.0295464
TGS1	0.0295388
GIMAP2	0.0294878
PPIB	0.0294874
PTPN7	0.0294488
PSMB10	0.0294347
NOP58	0.0294302
RAX2	0.0294202
KIF20B	0.0293828
ADRM1	0.0293775
CDIP1	0.0293738
ENSSSCG00000002550	0.029346
EXOSC4	0.0293401
TRA2B	0.0293324
MAEA	0.0292962
NT5DC2	0.0292905
ENSSSCG00000032949	0.0292666
SNRPF	0.0292558
ENSSSCG00000000273	0.0292538
HMGN3	0.0292269
HMG20A	0.0292026
CLK4	0.029188
GOLGA4	0.0291668
TIMM13	0.0291104
CIB1	0.0290886
SMG7	0.0290861
MDFIC	0.029053
PARP14	0.0290342
CCND3	0.0290161
RBM26	0.0289766
TMCO6	0.0289645
DICER1	0.0289622
CTSS	0.0289097
STAT1	0.0289091
TRAPPC8	0.028891
GMNN	0.0288904
BUD31	0.0288366
ENSSSCG00000035617	0.0288172
GSPT1	0.0287928
ITPRIPL1	0.028773
PRDM1	0.0287577
AGTPBP1	0.0287469
CRAMP1	0.0287407
DYNLL1	0.0286536
ENSSSCG00000030300	0.0286481
UBE4A	0.0285813
DCXR	0.0285679
ENSSSCG00000009633	0.0285457
ENSSSCG00000008309	0.0285394
CAPNS1	0.0285193
HDAC1	0.0284728
FAR1	0.0284508
KIAA0930	0.0284441
ANKS3	0.0284294
FCRL6	0.0283906
ZC3H13	0.0283846
NCOA4	0.0283629
RGCC	0.0282812
SNRNP25	0.0282786
SLC37A4	0.0282151
MPHOSPH6	0.028215
ENSSSCG00000004441	0.0282074
CWC27	0.0281934
NONO	0.0281876
TERF2IP	0.0281815
TSC22D2	0.0281796
EIF1B	0.0281713
ACAT1	0.0281687
PEA15	0.028168
VRK1	0.0281668
ENSSSCG00000040118	0.0281655
HSPD1	0.0281635
LRRC45	0.0281397
TMEM39A	0.0281141
TNFRSF1A	0.028113
ENSSSCG00000012046	0.0281078
ENSSSCG00000003885	0.0280818
RFESD	0.0280724
ZNF800	0.0280665
ENSSSCG00000004583	0.0280637
NSD1	0.0280129
EIF2AK3	0.0280123
KLHL11	0.0279956
HTATSF1	0.0279838
ATP5F1A	0.0279763
ENSSSCG00000001075	0.027962
2021-09-02	0.0279586
RSBN1	0.0278955
ENSSSCG00000033212	0.0278798
ARL6IP1	0.0278693
LY86	0.0278479
STK39	0.0278417
UBE2G1	0.0278391
MAD2L1BP	0.0277698
WDR5	0.0277676
CCT3	0.0277675
PPP2R5C	0.027729
KCNAB2	0.0277212
LEPROTL1	0.0277041
CD84	0.027694
ZC3H15	0.0276878
RANBP6	0.0276672
NCK2	0.0276653
ENSSSCG00000039612	0.0276394
ERH	0.0276182
RSRP1	0.0276107
TMEM30A	0.0276055
PSMC6	0.0275886
TEX264	0.0275774
ENSSSCG00000016902	0.0275129
IL10	0.0275098
ZFYVE19	0.0275019
CSDE1	0.0274794
GRK6	0.0274695
TPM4	0.0274236
ANXA11	0.0274194
TYMS	0.0274075
TMEM209	0.0274059
FCGRT	0.0274034
AKR1A1	0.0274024
CEP250	0.0273733
2021-03-05	0.0273699
NDUFC1	0.0273647
PICALM	0.0273485
ELF1	0.0273302
SAP30L	0.0273201
TNFSF14	0.027318
COA3	0.0273171
SCML4	0.0273131
MNDA	0.0273044
HIGD2A	0.0272772
SH2D2A	0.0272494
DDX3Y	0.0272424
UGDH	0.0272343
BLOC1S1	0.027234
CCNI	0.0272144
RARG	0.0272115
ACOT4	0.0271989
EIPR1	0.0271828
ENSSSCG00000016687	0.0271816
NOP10	0.0271779
DRG1	0.0271776
MED9	0.0271598
PRRC2B	0.0271514
JARID2	0.0271502
ATXN10	0.0271309
CTCF	0.0271241
SUPT3H	0.0271232
PRKAG2	0.0271221
FXR1	0.0271115
RFNG	0.0271003
TNRC6C	0.0270914
MRPL43	0.0270809
ENSSSCG00000023126	0.0270465
ATF2	0.0270265
CCDC115	0.0270207
TMEM173	0.0270137
MRPL21	0.0269841
GCHFR	0.0269466
ENSSSCG00000009851	0.0269442
SLAMF7	0.0269367
APMAP	0.0269294
UBR5	0.0269234
VPS13D	0.0269174
THUMPD2	0.0269136
ENSSSCG00000012178	0.0269128
ZNF688	0.0269063
NSD3	0.0268962
ENSSSCG00000037655	0.026883
ENSSSCG00000038630	0.0268816
JAK3	0.0268788
NFYC	0.026863
PLSCR3	0.0268602
BOLA3	0.0268554
LSM8	0.0268368
GAB3	0.0268309
MAP2K3	0.02682
SLC44A2	0.0268105
UMODL1	0.0268039
EIF4G3	0.02679
PRKD3	0.0267647
ACTN4	0.0267469
SPTY2D1	0.0267357
NIPAL3	0.0267163
SHISA5	0.0266963
ARFGAP1	0.0266845
PIEZO1	0.026669
AP3B1	0.0266452
ZKSCAN1	0.0266449
ENSSSCG00000031855	0.0266196
OXLD1	0.0266159
C3orf38	0.0266095
CEP290	0.0266017
RASA3	0.026596
PLAAT3	0.0265816
SIKE1	0.0265809
EXOSC8	0.0265758
ENSSSCG00000026389	0.0265178
SMARCA5	0.0265082
CDKN1B	0.0264919
ENSSSCG00000006628	0.0264689
ACIN1	0.0264575
ATP6V1F	0.0264292
SNX3	0.0263927
SDCBP	0.0263719
QARS	0.0263712
TXNDC9	0.0263538
IARS	0.0263493
PRPF40A	0.0263437
RTF2	0.0263375
EMP1	0.0263273
LMBR1	0.0263056
DYNLRB1	0.0262898
MKRN1	0.0262773
TAF1D	0.026273
TMEM11	0.0262679
RFXANK	0.0262654
ATP5F1C	0.0262596
ENSSSCG00000028097	0.026252
DDT	0.0262504
SLC35B1	0.0262344
SON	0.0262339
ANGEL2	0.0262245
ENSSSCG00000003219	0.0261907
PSMB3	0.0261847
UPF3B	0.0261832
ENSSSCG00000014280	0.0261534
RIT1	0.0261191
ARCN1	0.0261167
YME1L1	0.0260776
MT3	0.0260484
TMED8	0.0260425
ENSSSCG00000014094	0.0260371
NKAP	0.0260318
ZFC3H1	0.0260236
PACS2	0.0260141
ENSSSCG00000006559	0.026012
UBFD1	0.0259898
YWHAB	0.0259889
TMEM131L	0.0259676
BRI3	0.0259653
ENSSSCG00000020870	0.0259539
ATF4	0.0259477
ENSSSCG00000021738	0.0259374
ENSSSCG00000004446	0.0259191
MFSD5	0.0258721
C18orf54	0.0258665
CTPS2	0.0258513
DEGS1	0.0258502
CAAP1	0.0258492
SLC35C2	0.0258299
UFD1	0.0258188
GPS1	0.0257768
SELENOF	0.0257749
CEP350	0.0257722
REEP5	0.0257705
MTPAP	0.0257202
CCND2	0.0257064
DPP9	0.0256723
RNF2	0.0256635
ENSSSCG00000026893	0.0256425
TCEAL1	0.025624
PIM1	0.0256011
ACADSB	0.0255499
FNBP1	0.0255332
PSMD2	0.0254801
APTX	0.0254785
NDUFS4	0.0254735
TERF2	0.0254694
MVP	0.0254398
GLUL	0.0254334
NFKBIA	0.0254171
EXOC2	0.0253935
ENSSSCG00000035894	0.0253909
CDS2	0.0253583
CALCOCO2	0.0253472
DHRS11	0.025345
ENSSSCG00000038359	0.0253075
RAB11A	0.025302
RAB28	0.0252767
COA6	0.0252581
USP18	0.0252574
EID1	0.025226
ENSSSCG00000014296	0.0252195
TRPM7	0.0252053
PSMC3	0.0252013
NDUFAF8	0.0251922
SRSF4	0.025174
RRAGC	0.0251729
EPS15L1	0.0251263
POLE3	0.0251067
SUCLG2	0.0251046
STARD4	0.0250928
WDR26	0.0250921
LSM14A	0.0250689
ATRX	0.0250628
ZBTB41	0.0250473
DAXX	0.0250413
ENSSSCG00000032616	0.0250218
CCDC102A	0.0250097
FAM43A	0.0249841
NUCB1	0.0249772
FBXL5	0.024957
UCK1	0.024939
NCOA1	0.0249269
ENSSSCG00000013260	0.0249243
PHKA1	0.0249209
PSMD6	0.0249149
BST2	0.0249039
CPNE3	0.0249002
NCBP2	0.0248834
GPBP1	0.0248611
PDAP1	0.0248547
PSMC2	0.0248503
TRNT1	0.0248461
GPI	0.0248172
NFAT5	0.0248105
CCNY	0.0248101
ETFB	0.0248032
GRHPR	0.0248025
BACH2	0.0247625
ENSSSCG00000029003	0.0247317
PTGES3	0.0246807
TPRG1L	0.0246397
WDR36	0.0246215
YTHDF3	0.0245709
SKP1	0.024568
TTC7A	0.0245673
ENSSSCG00000006851	0.0245654
LYRM7	0.0245415
ACADVL	0.0245311
ENSSSCG00000002688	0.0245199
RNF4	0.0244789
SHKBP1	0.0244764
ENSSSCG00000013568	0.0244547
ATPAF2	0.0244481
PGK1	0.0244235
TMEM14A	0.0243934
NAPRT	0.0243672
ZNF146	0.0243615
ENSSSCG00000009341	0.0243541
ORAI3	0.0243521
ENSSSCG00000007944	0.0243388
NAA10	0.0243381
KATNA1	0.0243371
RECQL	0.0243021
PNN	0.0242948
ENSSSCG00000031140	0.0242907
COMMD3	0.024281
PMPCB	0.0242625
RHBDL2	0.0242281
SMG1	0.0242142
RBFA	0.024205
PBRM1	0.0242018
CCP110	0.0241955
ERO1A	0.0241841
CNDP2	0.024178
MAP3K4	0.0241738
MPHOSPH8	0.0241576
ENSSSCG00000039249	0.0241467
SUPT20H	0.0241292
CEBPZ	0.0241274
ESCO1	0.0241229
AQP3	0.0241104
ZFPL1	0.0241103
ENSSSCG00000004945	0.0241085
SLA	0.0241049
LSM7	0.0240981
MCRIP1	0.0240795
STK19	0.0240462
SERTAD3	0.0240366
HSD17B4	0.0240184
MRPL16	0.0239581
CWF19L2	0.0239526
DNAJC10	0.0239426
CAMTA2	0.0239404
PTGER4	0.0239244
POLR2K	0.0238982
ZYG11B	0.0238966
MAP4K3	0.0238879
SMPD2	0.0238781
PRRC2C	0.0238741
NR3C1	0.0238732
AEBP2	0.0238627
WASF2	0.023858
MRPL55	0.0238444
GNE	0.0238112
OTULIN	0.0237778
GPD1	0.0237504
UTP18	0.0237478
ENSSSCG00000032942	0.0237404
DDX24	0.0237291
PRPF31	0.0237153
TMEM87B	0.0237065
ADH5	0.0236962
RNF166	0.0236512
WBP2	0.0236294
P2RY10	0.0236292
WHAMM	0.0235976
DPF2	0.0235747
PXMP4	0.0235734
UVRAG	0.023573
DDB2	0.0235596
DTNBP1	0.0235579
ARID1A	0.0235221
GOT1	0.023508
TMEM203	0.0235035
POP7	0.0235018
HERC1	0.0234838
PARP11	0.0234679
SMARCA2	0.0234463
PPP1R11	0.0234372
SETX	0.0234274
PDCD1LG2	0.0234111
ENSSSCG00000012517	0.0234042
SNRPD3	0.0234015
ENSSSCG00000016768	0.0233952
FKBP5	0.0233718
ENSSSCG00000031169	0.0233657
MAPK3	0.0233644
PCBP2	0.0233458
ENSSSCG00000008222	0.0233449
PFDN2	0.023338
MRPL38	0.0233333
DSP	0.0233163
PGAM5	0.0233011
ENSSSCG00000025631	0.0232955
BCAT1	0.0232858
ENSSSCG00000035856	0.0232826
ENSSSCG00000008576	0.0232748
MARK4	0.0232699
ENSSSCG00000038187	0.0232444
ENSSSCG00000014387	0.0232279
DTYMK	0.0232212
ENSSSCG00000027840	0.0232171
DIABLO	0.0232037
RASSF5	0.0231948
AKT3	0.0231937
DLST	0.0231394
FAM114A2	0.0231384
DR1	0.0231344
UBL3	0.0231255
AACS	0.0231188
DHRS1	0.0231163
ENSSSCG00000015011	0.0231135
NRROS	0.0231008
ENSSSCG00000038960	0.0230971
NAV1	0.023049
SAMM50	0.0230172
MTHFD2	0.0230151
DCTN3	0.0230149
NPM1	0.0230073
RCBTB1	0.0229951
CREBZF	0.0229796
ENSSSCG00000037299	0.0229683
CD3E	0.0229472
UPP1	0.0229421
PSKH1	0.0229335
RAB11B	0.022932
RPS19BP1	0.0229169
ENSSSCG00000033272	0.0228895
SLTM	0.0228863
ENSSSCG00000030002	0.0228848
ENSSSCG00000011764	0.0228735
ENSSSCG00000024313	0.0228574
GPR137	0.0228299
ENSSSCG00000001038	0.0228211
2021-09-06	0.022816
AGAP2	0.02281
PCLAF	0.0228002
SCAF11	0.0227814
PGLYRP2	0.0227793
RB1	0.022774
ENSSSCG00000012654	0.0227722
SESN1	0.0227695
NSFL1C	0.0227681
TMOD3	0.0227584
ENSSSCG00000017165	0.0227402
INO80C	0.0227179
ENSSSCG00000027046	0.0227092
DAZAP2	0.0227031
ZHX1	0.0226881
ERP29	0.0226623
ENSSSCG00000027905	0.0226316
C14orf132	0.0226158
BIRC5	0.0226132
GABBR1	0.0226048
ENSSSCG00000025107	0.0226014
MINPP1	0.0225987
ZNRF2	0.0225948
PRADC1	0.0225925
CSAD	0.0225836
BLVRB	0.0225422
EIF2AK1	0.0225396
MRPS11	0.0225355
FAM32A	0.0225352
AVL9	0.0225153
ENSSSCG00000014031	0.0225039
SLA2	0.0224964
ENSSSCG00000006376	0.0224894
H2AFZ	0.0224826
ROMO1	0.0224686
RSF1	0.0224638
ORC6	0.0224569
ARFGAP2	0.0224494
ETFRF1	0.0224486
TMA7	0.0224343
ELP4	0.0224279
ENSSSCG00000032894	0.0224265
SCRN2	0.0224259
VAPA	0.022419
RAB2A	0.0223967
NOLC1	0.022389
RMDN1	0.0223779
FAS	0.0223731
TBC1D10C	0.0223624
PTTG1IP	0.0223581
MVD	0.0223556
TOR1AIP1	0.0223358
SLC11A2	0.0223305
CCS	0.0223239
ACO2	0.0223085
SEC16A	0.0223038
GEMIN2	0.0222783
PPP2R5D	0.0222754
YWHAH	0.0222721
CHFR	0.0222697
TM9SF3	0.0222687
TATDN1	0.0222641
ADCY4	0.0222625
RIC8A	0.0222063
NOP56	0.022202
RALBP1	0.0221882
ERGIC3	0.0221565
MEF2A	0.0221558
GDI2	0.0221515
GLIPR2	0.022145
YIPF2	0.0221226
DYNC1LI1	0.0221127
MTX2	0.0221117
ARHGAP31	0.022092
IL27RA	0.0220891
GARS	0.0220883
REL	0.0220729
ZNF140	0.0220643
DOCK11	0.0220339
TNFSF11	0.0220306
LASP1	0.0220118
NAGLU	0.0220071
RALA	0.0220058
SRSF7	0.0220046
CCDC6	0.021981
NME6	0.0219736
MED13	0.0219725
ZNF292	0.0219713
ENSSSCG00000016323	0.0219711
ALAD	0.0219677
ENSSSCG00000005440	0.0219608
CCDC71	0.0219452
MIB1	0.021939
ENSSSCG00000012886	0.0219376
RNF135	0.0219182
AVIL	0.0219007
PFDN4	0.0218977
NCKAP1L	0.0218949
BSDC1	0.0218727
ENSSSCG00000005518	0.0218611
PDK1	0.0218569
LACTB	0.0218526
CORO1C	0.0218524
AGPS	0.0218215
TMEM186	0.0218181
PDCD5	0.0218009
NAF1	0.0217843
ANKRD44	0.0217842
COG4	0.0217803
FLOT1	0.0217797
MYH11	0.0217681
CCDC186	0.0217606
PCM1	0.0217493
ENSSSCG00000017754	0.0217455
ENSSSCG00000027974	0.0217385
PSME1	0.0217363
BNIP3	0.0217169
RALGAPA2	0.0217156
NAA20	0.0217147
MTG1	0.0217063
MRPS24	0.0217021
RBM39	0.021698
GALNT3	0.0216749
ENSSSCG00000004082	0.0216694
ENSSSCG00000040827	0.0216642
PCMT1	0.0216633
PRKCSH	0.0216576
PTK2B	0.0216554
NOB1	0.0216458
ENSA	0.0216335
NAT9	0.0216214
GNPDA2	0.0215898
ENSSSCG00000015473	0.0215775
ENSSSCG00000038708	0.0215659
LMNB1	0.0215606
MCF2L	0.0215592
MPP1	0.0215524
ERAP1	0.0215465
ENSSSCG00000014997	0.0215461
TCEANC	0.0215441
[truncated: 12,388 more rows]

[truncated: 7 more sheets: 21v31_Permutation, 24v31_Impurity, 24v31_Permutation, Error_rate, RF_Impurity_GD, RF_Permutation_GD, DEG CD2 gdTCR]
